# Supplementary material for: Targeted degradation of BRD9 reverses oncogenic gene expression in synovial sarcoma
Source: eLife. 2018 Nov 15;7:e41305. doi: 10.7554/eLife.41305 (PMC6277197; doi:10.7554/eLife.41305)
Supplement: Figure 1—source data 1. [file elife-41305-fig1-data1.xlsx]

## Sheet: Figure 1-source data 1
Replicate1						Replicate2
sgRNA_name	Domain class	Day3_reads	Day15_reads	Fold Change (d3/d15)		sgRNA_name	Domain class	Day3_reads	Day15_reads	Fold Change (d3/d15)
ACAT1_e7_151.0	AT	792	844	0.702218		ACAT1_e7_151.0	AT	1192	536	0.863269
ACAT1_e7_151.4	AT	351	385	0.681517		ACAT1_e7_151.4	AT	352	236	0.57845
ACAT1_e7_151.6	AT	1707	1493	0.855914		ACAT1_e7_151.6	AT	2494	1225	0.790628
ACAT1_e8_96.0	AT	1137	1675	0.50819		ACAT1_e8_96.0	AT	1738	1277	0.528538
ACAT1_e8_96.1	AT	2334	1659	1.05325		ACAT1_e8_96.1	AT	3302	1424	0.90053
ACTR_e18_255.23	AT	1029	377	2.04026		ACTR_e18_255.23	AT	1316	435	1.17416
ACTR_e18_255.26	AT	942	376	1.87272		ACTR_e18_255.26	AT	1749	312	2.17492
ACTR_e19_105.4	AT	1102	532	1.54929		ACTR_e19_105.4	AT	1731	418	1.60719
ACTR_e20_258.1	AT	2194	1101	1.49152		ACTR_e20_258.1	AT	3475	728	1.85328
ACTR_e20_258.22	AT	981	997	0.736414		ACTR_e20_258.22	AT	1238	661	0.727132
ASH1L_BD_e18_55.0	BD	1117	830	1.00707		ASH1L_BD_e18_55.0	BD	1598	603	1.0288
ASH1L_BD_e18_55.1	BD	1268	806	1.17721		ASH1L_BD_e18_55.1	BD	1655	505	1.2721
ASH1L_BD_e19_133.3	BD	626	626	0.748092		ASH1L_BD_e19_133.3	BD	914	299	1.18593
ASH1L_BD_e19_133.7	BD	1931	658	2.19552		ASH1L_BD_e19_133.7	BD	2754	732	1.46074
ASH1L_BD_e20_79.1	BD	1474	376	2.93035		ASH1L_BD_e20_79.1	BD	2033	413	1.91042
ASH1L_BD_e20_79.2	BD	1345	1914	0.52612		ASH1L_BD_e20_79.2	BD	1740	1149	0.588074
ASH1L_e11_118.0	SET	1112	1912	0.435433		ASH1L_e11_118.0	SET	1890	1190	0.616769
ASH1L_e11_118.11	SET	1347	726	1.38822		ASH1L_e11_118.11	SET	2169	535	1.57377
ASH1L_e12_147.13	SET	3016	1320	1.71035		ASH1L_e12_147.13	SET	4063	1328	1.18815
ASH1L_e12_147.5	SET	1291	909	1.06287		ASH1L_e12_147.5	SET	2083	757	1.06837
ASH1L_e13_109.0	SET	438	120	2.71685		ASH1L_e13_109.0	SET	597	172	1.34529
ASH1L_e13_109.1	SET	326	375	0.649822		ASH1L_e13_109.1	SET	412	266	0.600802
ATAD2_BD_e21_95.1	BD	2086	709	2.20132		ATAD2_BD_e21_95.1	BD	3018	671	1.7462
ATAD2_BD_e21_95.2	BD	599	397	1.12796		ATAD2_BD_e21_95.2	BD	984	263	1.45127
ATAD2_BD_e22_197.4	BD	584	208	2.09538		ATAD2_BD_e22_197.4	BD	723	205	1.36745
ATAD2_BD_e22_197.8	BD	1668	1226	1.01839		ATAD2_BD_e22_197.8	BD	2598	933	1.08125
ATAD2_BD_e23_86.1	BD	3122	1988	1.17578		ATAD2_BD_e23_86.1	BD	4505	1337	1.30854
ATAD2_BD_e23_86.2	BD	258	188	1.02379		ATAD2_BD_e23_86.2	BD	530	146	1.40643
ATAD2B_BD_e21_95.5	BD	1128	733	1.15143		ATAD2B_BD_e21_95.5	BD	1646	380	1.68094
ATAD2B_BD_e21_95.6	BD	928	277	2.50248		ATAD2B_BD_e21_95.6	BD	1601	328	1.89388
ATAD2B_BD_e22_160.4	BD	747	397	1.40665		ATAD2B_BD_e22_160.4	BD	1042	475	0.851468
ATAD2B_BD_e22_160.8	BD	2080	1834	0.849104		ATAD2B_BD_e22_160.8	BD	2897	1028	1.09431
ATAD2B_BD_e23_86.1	BD	877	474	1.3836		ATAD2B_BD_e23_86.1	BD	1278	676	0.73398
ATAD2B_BD_e23_86.2	BD	1907	1023	1.39518		ATAD2B_BD_e23_86.2	BD	2840	836	1.31905
ATAT1_e4_50.0	AT	1425	1114	0.957441		ATAT1_e4_50.0	AT	1959	1124	0.676811
ATAT1_e5_114.0	AT	1892	1516	0.93429		ATAT1_e5_114.0	AT	2634	1187	0.861732
ATAT1_e5_114.2	AT	1315	629	1.56399		ATAT1_e5_114.2	AT	2002	444	1.75005
ATAT1_e5_114.5	AT	528	320	1.23294		ATAT1_e5_114.5	AT	782	220	1.37837
ATAT1_e6_102.0	AT	1096	1009	0.812964		ATAT1_e6_102.0	AT	2009	860	0.907057
ATAT1_e6_102.1	AT	1226	1025	0.895208		ATAT1_e6_102.1	AT	1743	551	1.22797
ATAT1_e6_102.6	AT	2436	1989	0.916966		ATAT1_e6_102.6	AT	3758	1669	0.874478
ATF2_e11_150.10	AT	3204	2579	0.930228		ATF2_e11_150.10	AT	4943	1969	0.975009
ATF2_e11_150.4	AT	545	563	0.724078		ATF2_e11_150.4	AT	700	358	0.758741
ATF2_e11_150.5	AT	1512	1225	0.923899		ATF2_e11_150.5	AT	2124	950	0.868166
ATF2_e11_150.7	AT	2293	2892	0.593701		ATF2_e11_150.7	AT	3489	2307	0.587394
ATF2_e11_150.9	AT	2435	1340	1.36027		ATF2_e11_150.9	AT	3806	1056	1.39957
ATRX_D_e18_147.2	ATPase	1094	756	1.08278		ATRX_D_e18_147.2	ATPase	1710	611	1.0865
ATRX_D_e19_178.0	ATPase	1080	697	1.15931		ATRX_D_e19_178.0	ATPase	1778	473	1.45903
ATRX_D_e19_178.6	ATPase	960	1053	0.682352		ATRX_D_e19_178.6	ATPase	1482	772	0.745353
ATRX_D_e20_138.2	ATPase	1368	1178	0.869239		ATRX_D_e20_138.2	ATPase	2227	749	1.15442
ATRX_H_e26_107.0	ATPase	1081	758	1.06709		ATRX_H_e26_107.0	ATPase	1573	755	0.808924
ATRX_H_e27_109.0	ATPase	1498	1056	1.06173		ATRX_H_e27_109.0	ATPase	2260	836	1.04966
ATRX_H_e28_178.3	ATPase	1539	2060	0.559355		ATRX_H_e28_178.3	ATPase	2146	1588	0.524834
BAZ1A_BD_e25_118.0	BD	1176	1840	0.478506		BAZ1A_BD_e25_118.0	BD	1806	1330	0.527337
BAZ1A_BD_e25_118.1	BD	700	742	0.705879		BAZ1A_BD_e25_118.1	BD	1021	487	0.813767
BAZ1A_BD_e25_118.4	BD	3426	1727	1.48519		BAZ1A_BD_e25_118.4	BD	4917	1547	1.23438
BAZ1A_BD_e26_88.1	BD	1217	1416	0.643387		BAZ1A_BD_e26_88.1	BD	1585	1068	0.576301
BAZ1A_BD_e26_88.4	BD	1699	2112	0.60231		BAZ1A_BD_e26_88.4	BD	2494	1446	0.669824
BAZ1A_BD_e27_135.3	BD	757	435	1.30117		BAZ1A_BD_e27_135.3	BD	1136	466	0.946193
BAZ1A_BD_e27_135.4	BD	1863	2090	0.667399		BAZ1A_BD_e27_135.4	BD	2362	1418	0.646895
BAZ1A_BD_e27_135.5	BD	999	1328	0.563115		BAZ1A_BD_e27_135.5	BD	1681	985	0.662689
BAZ1B_BD_e18_67.0	BD	587	498	0.881517		BAZ1B_BD_e18_67.0	BD	1135	386	1.14109
BAZ1B_BD_e18_67.4	BD	2033	467	3.25536		BAZ1B_BD_e18_67.4	BD	2822	579	1.89207
BAZ1B_BD_e18_67.5	BD	2357	605	2.91435		BAZ1B_BD_e18_67.5	BD	3535	499	2.74979
BAZ1B_BD_e19_237.1	BD	2310	974	1.77498		BAZ1B_BD_e19_237.1	BD	3375	604	2.16924
BAZ1B_BD_e19_237.13	BD	752	114	4.90844		BAZ1B_BD_e19_237.13	BD	1482	90	6.3692
BAZ1B_BD_e19_237.6	BD	324	125	1.92981		BAZ1B_BD_e19_237.6	BD	545	81	2.60126
BAZ2A_BD_e28_144.16	BD	950	651	1.09174		BAZ2A_BD_e28_144.16	BD	1414	381	1.44023
BAZ2A_BD_e28_144.17	BD	1425	825	1.29253		BAZ2A_BD_e28_144.17	BD	2180	467	1.81187
BAZ2A_BD_e28_144.19	BD	335	76	3.26924		BAZ2A_BD_e28_144.19	BD	490	41	4.59903
BAZ2A_BD_e29_135.7	BD	1233	255	3.61097		BAZ2A_BD_e29_135.7	BD	2034	337	2.34191
BAZ2A_BD_e29_135.8	BD	1426	306	3.48186		BAZ2A_BD_e29_135.8	BD	2250	338	2.58295
BAZ2A_BD_e29_135.9	BD	801	142	4.20275		BAZ2A_BD_e29_135.9	BD	1215	146	3.22418
BAZ2B_BD_e36_144.1	BD	836	1050	0.595911		BAZ2B_BD_e36_144.1	BD	1190	809	0.571136
BAZ2B_BD_e36_144.2	BD	717	783	0.685199		BAZ2B_BD_e36_144.2	BD	1059	612	0.671766
BAZ2B_BD_e36_144.8	BD	812	923	0.65838		BAZ2B_BD_e36_144.8	BD	1371	724	0.735217
BAZ2B_BD_e37_139.0	BD	945	967	0.731381		BAZ2B_BD_e37_139.0	BD	1764	633	1.08188
BAZ2B_BD_e37_139.2	BD	217	218	0.742999		BAZ2B_BD_e37_139.2	BD	379	168	0.874332
BAZ2B_BD_e37_139.3	BD	1031	568	1.35773		BAZ2B_BD_e37_139.3	BD	1375	535	0.997661
BPTF_BD_e23_85.10	BD	4152	1954	1.59089		BPTF_BD_e23_85.10	BD	6486	1248	2.01826
BPTF_BD_e23_85.11	BD	2114	898	1.76174		BPTF_BD_e23_85.11	BD	3442	644	2.07497
BPTF_BD_e24_187.1	BD	1473	1534	0.718852		BPTF_BD_e24_187.1	BD	2465	1507	0.635245
BPTF_BD_e24_187.3	BD	2167	1137	1.42655		BPTF_BD_e24_187.3	BD	2816	633	1.72708
BPTF_BD_e24_187.7	BD	1380	385	2.67947		BPTF_BD_e24_187.7	BD	2177	352	2.39986
BRD1_BD_e5_95.10	BD	1747	1423	0.919039		BRD1_BD_e5_95.10	BD	2616	1103	0.920998
BRD1_BD_e5_95.7	BD	1401	721	1.45387		BRD1_BD_e5_95.7	BD	2325	582	1.55081
BRD1_BD_e5_95.9	BD	1757	1572	0.836733		BRD1_BD_e5_95.9	BD	2631	1103	0.926279
BRD1_BD_e6_237.10	BD	509	638	0.596846		BRD1_BD_e6_237.10	BD	786	505	0.604153
BRD1_BD_e6_237.11	BD	492	838	0.439347		BRD1_BD_e6_237.11	BD	916	410	0.867061
BRD1_BD_e6_237.9	BD	1063	1014	0.784601		BRD1_BD_e6_237.9	BD	1588	885	0.696732
BRD2_BD1_e2_109.12	BD1	2173	834	1.94975		BRD2_BD1_e2_109.12	BD1	3097	423	2.84153
BRD2_BD1_e2_109.3	BD1	1743	568	2.29536		BRD2_BD1_e2_109.3	BD1	2291	518	1.7168
BRD2_BD1_e2_109.4	BD1	1027	323	2.37595		BRD2_BD1_e2_109.4	BD1	1867	279	2.59588
BRD2_BD1_e3_138.2	BD1	415	168	1.84196		BRD2_BD1_e3_138.2	BD1	950	131	2.80877
BRD2_BD1_e3_138.3	BD1	1713	984	1.30289		BRD2_BD1_e3_138.3	BD1	2494	593	1.6327
BRD2_BD1_e3_138.8	BD1	3048	471	4.83925		BRD2_BD1_e3_138.8	BD1	4180	610	2.66023
BRD2_BD1_e4_60.1	BD1	896	209	3.1995		BRD2_BD1_e4_60.1	BD1	1214	114	4.12274
BRD2_BD1_e4_60.3	BD1	1666	1414	0.882003		BRD2_BD1_e4_60.3	BD1	2454	946	1.00729
BRD2_BD2_e6_145.6	BD2	1958	764	1.91764		BRD2_BD2_e6_145.6	BD2	2699	612	1.71208
BRD2_BD2_e6_145.7	BD2	1586	568	2.08861		BRD2_BD2_e6_145.7	BD2	2163	537	1.56357
BRD2_BD2_e7_129.0	BD2	806	389	1.5489		BRD2_BD2_e7_129.0	BD2	1302	318	1.58856
BRD2_BD2_e7_129.6	BD2	820	474	1.29367		BRD2_BD2_e7_129.6	BD2	1023	318	1.24815
BRD2_BD2_e7_129.7	BD2	1795	1051	1.27828		BRD2_BD2_e7_129.7	BD2	2378	815	1.13291
BRD3_BD1_e2_112.5	BD1	3477	3135	0.830496		BRD3_BD1_e2_112.5	BD1	4818	1813	1.03211
BRD3_BD1_e2_112.6	BD1	1987	1356	1.09691		BRD3_BD1_e2_112.6	BD1	2635	837	1.22237
BRD3_BD1_e2_112.7	BD1	1239	1156	0.802244		BRD3_BD1_e2_112.7	BD1	2165	969	0.86758
BRD3_BD1_e3_138.5	BD1	682	571	0.893415		BRD3_BD1_e3_138.5	BD1	911	343	1.03058
BRD3_BD1_e3_138.7	BD1	3377	2384	1.06063		BRD3_BD1_e3_138.7	BD1	4600	1861	0.959998
BRD3_BD1_e3_138.8	BD1	3218	2843	0.847557		BRD3_BD1_e3_138.8	BD1	4994	2091	0.927605
BRD3_BD1_e4_66.0	BD1	798	1097	0.54447		BRD3_BD1_e4_66.0	BD1	1036	552	0.728559
BRD3_BD1_e4_66.4	BD1	2130	1405	1.13487		BRD3_BD1_e4_66.4	BD1	2809	1154	0.945255
BRD3_BD1_e4_66.5	BD1	903	302	2.23398		BRD3_BD1_e4_66.5	BD1	1157	194	2.31213
BRD3_BD2_e6_145.5	BD2	1763	1397	0.944708		BRD3_BD2_e6_145.5	BD2	2592	1297	0.776094
BRD3_BD2_e7_129.0	BD2	1060	491	1.6145		BRD3_BD2_e7_129.0	BD2	1653	363	1.76706
BRD3_BD2_e7_129.3	BD2	1600	1704	0.702965		BRD3_BD2_e7_129.3	BD2	2591	988	1.01833
BRD3_BD2_e7_129.8	BD2	786	936	0.628454		BRD3_BD2_e7_129.8	BD2	1004	738	0.5282
BRD4_BD1_e2_121.1	BD1	1399	54	19.1389		BRD4_BD1_e2_121.1	BD1	1947	78	9.64857
BRD4_BD1_e2_121.4	BD1	2064	136	11.3047		BRD4_BD1_e2_121.4	BD1	3373	152	8.59832
BRD4_BD1_e2_121.9	BD1	1690	1216	1.0403		BRD4_BD1_e2_121.9	BD1	2514	740	1.31903
BRD4_BD1_e3_138.0	BD1	566	97	4.33689		BRD4_BD1_e3_138.0	BD1	850	91	3.61307
BRD4_BD1_e3_138.2	BD1	1265	97	9.69288		BRD4_BD1_e3_138.2	BD1	1749	151	4.48793
BRD4_BD1_e3_138.3	BD1	351	82	3.17701		BRD4_BD1_e3_138.3	BD1	496	85	2.25648
BRD4_BD1_e4_68.0	BD1	675	53	9.40606		BRD4_BD1_e4_68.0	BD1	1134	97	4.5233
BRD4_BD1_e4_68.1	BD1	236	19	8.95038		BRD4_BD1_e4_68.1	BD1	424	22	7.35683
BRD4_BD1_e4_68.2	BD1	1301	69	13.9706		BRD4_BD1_e4_68.2	BD1	1838	40	17.6782
BRD4_BD2_e6_148.11	BD2	1938	403	3.59515		BRD4_BD2_e6_148.11	BD2	3170	488	2.52141
BRD4_BD2_e7_130.0	BD2	370	98	2.80636		BRD4_BD2_e7_130.0	BD2	620	116	2.06934
BRD4_BD2_e7_130.13	BD2	1665	398	3.12744		BRD4_BD2_e7_130.13	BD2	2157	392	2.13542
BRD4_BD2_e7_130.14	BD2	1122	282	2.97212		BRD4_BD2_e7_130.14	BD2	1879	227	3.21002
BRD8_BD_e17_77.2	BD	1030	282	2.72842		BRD8_BD_e17_77.2	BD	1361	416	1.26972
BRD8_BD_e18_69.0	BD	324	65	3.69088		BRD8_BD_e18_69.0	BD	368	32	4.41374
BRD8_BD_e18_69.2	BD	2294	624	2.75019		BRD8_BD_e18_69.2	BD	3190	803	1.54246
BRD8_BD_e18_69.3	BD	1234	449	2.05504		BRD8_BD_e18_69.3	BD	2177	478	1.76778
BRD8_BD_e19_178.3	BD	1037	582	1.33282		BRD8_BD_e19_178.3	BD	1456	342	1.65193
BRD8_BD_e19_178.4	BD	1502	312	3.59707		BRD8_BD_e19_178.4	BD	2483	391	2.46444
BRD9_BD_e5_145.7	BD	2497	459	4.06792		BRD9_BD_e5_145.7	BD	3783	480	3.0591
BRD9_BD_e6_111.2	BD	854	77	8.22692		BRD9_BD_e6_111.2	BD	1268	42	11.6204
BRD9_BD_e6_111.4	BD	1667	571	2.18376		BRD9_BD_e6_111.4	BD	2071	371	2.16621
BRDT_BD1_e2_121.3	BD1	2798	1398	1.49824		BRDT_BD1_e2_121.3	BD1	4280	946	1.75681
BRDT_BD1_e2_121.5	BD1	891	658	1.01305		BRDT_BD1_e2_121.5	BD1	1297	432	1.16524
BRDT_BD1_e2_121.6	BD1	1367	509	2.00857		BRDT_BD1_e2_121.6	BD1	1836	362	1.9681
BRDT_BD1_e3_138.1	BD1	347	396	0.65507		BRDT_BD1_e3_138.1	BD1	627	317	0.767407
BRDT_BD1_e3_138.2	BD1	383	587	0.488069		BRDT_BD1_e3_138.2	BD1	528	341	0.600806
BRDT_BD1_e4_68.0	BD1	1449	923	1.17487		BRDT_BD1_e4_68.0	BD1	1899	643	1.14657
BRDT_BD1_e4_68.1	BD1	1434	716	1.4985		BRDT_BD1_e4_68.1	BD1	1726	552	1.2138
BRDT_BD2_e6_150.1	BD2	1181	1500	0.589408		BRDT_BD2_e6_150.1	BD2	1647	1253	0.510455
BRDT_BD2_e6_150.6	BD2	1592	793	1.50222		BRDT_BD2_e6_150.6	BD2	2398	616	1.51128
BRDT_BD2_e6_150.7	BD2	547	493	0.829766		BRDT_BD2_e6_150.7	BD2	747	501	0.578756
BRDT_BD2_e7_129.2	BD2	866	617	1.04998		BRDT_BD2_e7_129.2	BD2	1145	373	1.19123
BRDT_BD2_e7_129.3	BD2	636	634	0.750463		BRDT_BD2_e7_129.3	BD2	1045	500	0.811257
BRDT_BD2_e7_129.4	BD2	647	336	1.43904		BRDT_BD2_e7_129.4	BD2	893	289	1.19873
BRPF1_BD_e6_118.11	BD	885	918	0.721474		BRPF1_BD_e6_118.11	BD	1264	683	0.718503
BRPF1_BD_e6_118.12	BD	1560	1134	1.02967		BRPF1_BD_e6_118.12	BD	2236	1085	0.800269
BRPF1_BD_e6_118.5	BD	2068	893	1.73304		BRPF1_BD_e6_118.5	BD	2687	768	1.35843
BRPF1_BD_e7_237.10	BD	1194	1255	0.712157		BRPF1_BD_e7_237.10	BD	1725	759	0.882418
BRPF1_BD_e7_237.5	BD	585	419	1.04386		BRPF1_BD_e7_237.5	BD	1118	366	1.18536
BRPF1_BD_e7_237.9	BD	735	426	1.29		BRPF1_BD_e7_237.9	BD	1063	486	0.848984
BRPF3_BD_e5_95.0	BD	1655	1293	0.958125		BRPF3_BD_e5_95.0	BD	2716	974	1.0828
BRPF3_BD_e5_95.3	BD	515	374	1.0293		BRPF3_BD_e5_95.3	BD	644	282	0.885907
BRPF3_BD_e6_190.23	BD	579	543	0.797544		BRPF3_BD_e6_190.23	BD	1159	352	1.27765
BRPF3_BD_e6_190.25	BD	779	549	1.06132		BRPF3_BD_e6_190.25	BD	1244	563	0.857752
BRPF3_BD_e6_190.4	BD	2757	2150	0.960111		BRPF3_BD_e6_190.4	BD	3879	1639	0.919152
BRWD1_BD1_e30_74.0	BD1	1046	789	0.992012		BRWD1_BD1_e30_74.0	BD1	1374	694	0.768659
BRWD1_BD1_e31_121.0	BD1	1514	1631	0.694939		BRWD1_BD1_e31_121.0	BD1	2194	1401	0.608173
BRWD1_BD1_e31_121.1	BD1	407	448	0.679306		BRWD1_BD1_e31_121.1	BD1	748	494	0.587736
BRWD1_BD1_e31_121.3	BD1	779	262	2.2206		BRWD1_BD1_e31_121.3	BD1	1261	479	1.02183
BRWD1_BD1_e32_126.0	BD1	2760	1466	1.40938		BRWD1_BD1_e32_126.0	BD1	4440	1122	1.5367
BRWD1_BD1_e32_126.1	BD1	1470	1260	0.873299		BRWD1_BD1_e32_126.1	BD1	2208	806	1.06366
BRWD1_BD1_e32_126.2	BD1	1405	1991	0.528343		BRWD1_BD1_e32_126.2	BD1	2042	1315	0.603047
BRWD1_BD2_e35_98.1	BD2	773	922	0.627437		BRWD1_BD2_e35_98.1	BD2	1590	585	1.05512
BRWD1_BD2_e35_98.2	BD2	1206	655	1.37748		BRWD1_BD2_e35_98.2	BD2	1866	512	1.41469
BRWD1_BD2_e35_98.3	BD2	1421	1567	0.678878		BRWD1_BD2_e35_98.3	BD2	1983	1163	0.662136
BRWD1_BD2_e36_153.0	BD2	1475	1125	0.981352		BRWD1_BD2_e36_153.0	BD2	2418	730	1.28603
BRWD1_BD2_e36_153.1	BD2	2184	1820	0.898415		BRWD1_BD2_e36_153.1	BD2	3351	1511	0.861287
BRWD1_BD2_e36_153.5	BD2	828	796	0.778365		BRWD1_BD2_e36_153.5	BD2	1357	373	1.41178
BRWD3_BD_e30_95.10	BD1	1489	1220	0.913572		BRWD3_BD_e30_95.10	BD1	1941	1290	0.584325
BRWD3_BD_e30_95.8	BD1	520	464	0.838029		BRWD3_BD_e30_95.8	BD1	759	349	0.843884
BRWD3_BD_e30_95.9	BD1	1410	1400	0.753934		BRWD3_BD_e30_95.9	BD1	2344	1049	0.867702
BRWD3_BD_e31_121.1	BD1	1794	1771	0.758394		BRWD3_BD_e31_121.1	BD1	2927	1278	0.889425
BRWD3_BD_e31_121.3	BD1	2499	2341	0.799282		BRWD3_BD_e31_121.3	BD1	3834	1811	0.822223
BRWD3_BD_e31_121.4	BD1	2977	2002	1.11334		BRWD3_BD_e31_121.4	BD1	4312	1973	0.84882
BRWD3_BD_e32_126.2	BD1	316	414	0.570658		BRWD3_BD_e32_126.2	BD1	468	163	1.11269
BRWD3_BD_e32_126.3	BD1	2950	4297	0.514109		BRWD3_BD_e32_126.3	BD1	3978	3056	0.505598
BRWD3_BD_e32_126.5	BD1	1369	1170	0.875818		BRWD3_BD_e32_126.5	BD1	1797	828	0.842681
BRWD3_BD2_e35_105.1	BD2	1053	657	1.19906		BRWD3_BD2_e35_105.1	BD2	1664	779	0.829371
BRWD3_BD2_e35_105.4	BD2	859	637	1.00883		BRWD3_BD2_e35_105.4	BD2	1014	480	0.819964
BRWD3_BD2_e35_105.5	BD2	2139	1784	0.897652		BRWD3_BD2_e35_105.5	BD2	3234	1343	0.935164
BRWD3_BD2_e36_75.0	BD2	1379	1453	0.710476		BRWD3_BD2_e36_75.0	BD2	2103	1563	0.522543
BRWD3_BD2_e37_153.0	BD2	2163	1997	0.810942		BRWD3_BD2_e37_153.0	BD2	3431	1727	0.771578
BRWD3_BD2_e37_153.10	BD2	1305	1374	0.710987		BRWD3_BD2_e37_153.10	BD2	2161	901	0.931305
BRWD3_BD2_e37_153.4	BD2	591	896	0.493618		BRWD3_BD2_e37_153.4	BD2	769	448	0.666226
BRWD3_BD2_e38_95.0	BD2	1857	1227	1.13286		BRWD3_BD2_e38_95.0	BD2	2651	1122	0.917521
CARM1_e5_111.13	RMT	450	398	0.845254		CARM1_e5_111.13	RMT	525	310	0.657057
CARM1_e5_111.6	RMT	1078	384	2.09853		CARM1_e5_111.6	RMT	1675	278	2.33729
CARM1_e5_111.7	RMT	770	442	1.30259		CARM1_e5_111.7	RMT	1103	244	1.75325
CARM1_e6_178.1	RMT	1049	783	1.00247		CARM1_e6_178.1	RMT	1775	347	1.98487
CARM1_e6_178.13	RMT	327	216	1.12997		CARM1_e6_178.13	RMT	487	212	0.890733
CARM1_e6_178.25	RMT	1048	558	1.40481		CARM1_e6_178.25	RMT	1277	385	1.28719
CDK1_e3.1	positive_control	2628	1799	1.09367		CDK1_e3.1	positive_control	3856	1335	1.12171
CDK1_e4.1	positive_control	1931	94	15.2645		CDK1_e4.1	positive_control	2414	63	14.7937
CDK1_e5.1	positive_control	632	14	32.0944		CDK1_e5.1	positive_control	795	31	9.8389
CDK1_e6.1	positive_control	2064	184	8.36762		CDK1_e6.1	positive_control	3059	235	5.04828
CDK1_e7.1	positive_control	1355	58	17.2748		CDK1_e7.1	positive_control	1965	57	13.3011
CDK9_e2.1	positive_control	804	318	1.88922		CDK9_e2.1	positive_control	1217	387	1.22037
CDK9_e3.1	positive_control	1787	561	2.38263		CDK9_e3.1	positive_control	2855	474	2.33788
CDK9_e4.1	positive_control	2152	1134	1.42042		CDK9_e4.1	positive_control	2974	898	1.28596
CDK9_e4.2	positive_control	1198	105	8.48506		CDK9_e4.2	positive_control	1830	76	9.30621
CDK9_e5.1	positive_control	1441	529	2.03736		CDK9_e5.1	positive_control	2122	234	3.51689
CDK9_e5.2	positive_control	1374	143	7.15907		CDK9_e5.2	positive_control	2105	142	5.74284
CECR2_BD_e12_92.0	BD	1052	623	1.26322		CECR2_BD_e12_92.0	BD	1552	366	1.64551
CECR2_BD_e12_92.1	BD	738	441	1.25128		CECR2_BD_e12_92.1	BD	1138	385	1.14708
CECR2_BD_e12_92.7	BD	1456	746	1.46036		CECR2_BD_e12_92.7	BD	2224	577	1.49629
CECR2_BD_e13_127.3	BD	1737	574	2.26358		CECR2_BD_e13_127.3	BD	2475	650	1.47826
CECR2_BD_e13_127.7	BD	1611	1314	0.917756		CECR2_BD_e13_127.7	BD	2111	891	0.919963
CECR2_BD_e13_127.9	BD	1686	1529	0.82549		CECR2_BD_e13_127.9	BD	2730	1030	1.02923
CECR2_BD_e14_59.0	BD	1553	1363	0.852926		CECR2_BD_e14_59.0	BD	2670	899	1.15322
CECR2_BD_e14_59.2	BD	868	439	1.47839		CECR2_BD_e14_59.2	BD	1123	429	1.01597
CECR2_BD_e14_59.3	BD	1125	1350	0.62381		CECR2_BD_e14_59.3	BD	1530	1129	0.526256
CHD1_D_e11_210.0	ATPase	915	944	0.725402		CHD1_D_e11_210.0	ATPase	1269	827	0.595801
CHD1_D_e12_90.0	ATPase	1465	1382	0.79354		CHD1_D_e12_90.0	ATPase	2088	865	0.937279
CHD1_D_e13_135.3	ATPase	956	1028	0.696022		CHD1_D_e13_135.3	ATPase	1450	627	0.897803
CHD1_H_e17_72.2	ATPase	1823	2542	0.536979		CHD1_H_e17_72.2	ATPase	2564	1785	0.557872
CHD1_H_e18_150.7	ATPase	1988	806	1.84566		CHD1_H_e18_150.7	ATPase	2742	990	1.0755
CHD1_H_e18_150.8	ATPase	2208	1467	1.12673		CHD1_H_e18_150.8	ATPase	2752	1133	0.943233
CHD1L_D_e4_115.1	ATPase	750	484	1.15883		CHD1L_D_e4_115.1	ATPase	844	322	1.01698
CHD1L_D_e4_115.7	ATPase	1491	412	2.70562		CHD1L_D_e4_115.7	ATPase	1902	419	1.76175
CHD1L_D_e6_82.1	ATPase	1770	617	2.14603		CHD1L_D_e6_82.1	ATPase	2708	744	1.41318
CHD1L_H_e10_50.2	ATPase	1037	379	2.0453		CHD1L_H_e10_50.2	ATPase	1369	448	1.18604
CHD1L_H_e11_74.2	ATPase	1433	1182	0.907461		CHD1L_H_e11_74.2	ATPase	1888	1139	0.643694
CHD1L_H_e12_111.0	ATPase	292	328	0.665262		CHD1L_H_e12_111.0	ATPase	532	332	0.621749
CHD1L_H_e13_115.2	ATPase	2121	316	5.01533		CHD1L_H_e13_115.2	ATPase	2960	356	3.22639
CHD2_D_e14_210.7	ATPase	937	233	3.00237		CHD2_D_e14_210.7	ATPase	1453	173	3.25533
CHD2_D_e15_90.0	ATPase	2400	3796	0.47345		CHD2_D_e15_90.0	ATPase	3380	2614	0.502222
CHD2_D_e16_135.13	ATPase	927	734	0.944964		CHD2_D_e16_135.13	ATPase	1470	670	0.851805
CHD2_H_e19_153.1	ATPase	739	604	0.915258		CHD2_H_e19_153.1	ATPase	1073	354	1.17617
CHD2_H_e20_72.0	ATPase	1386	383	2.70514		CHD2_H_e20_72.0	ATPase	1781	250	2.76312
CHD2_H_e21_150.10	ATPase	1166	137	6.33993		CHD2_H_e21_150.10	ATPase	1741	103	6.54148
CHD3_D_e14_79.5	ATPase	1375	1755	0.586563		CHD3_D_e14_79.5	ATPase	2337	1073	0.845768
CHD3_D_e15_201.10	ATPase	809	550	1.10019		CHD3_D_e15_201.10	ATPase	1215	578	0.81603
CHD3_D_e16_138.12	ATPase	491	685	0.536279		CHD3_D_e16_138.12	ATPase	659	293	0.872553
CHD3_D_e17_63.0	ATPase	1596	2023	0.590678		CHD3_D_e17_63.0	ATPase	2177	1298	0.651333
CHD3_H_e20_86.3	ATPase	904	975	0.693912		CHD3_H_e20_86.3	ATPase	1695	935	0.703926
CHD3_H_e21_118.4	ATPase	1592	944	1.26212		CHD3_H_e21_118.4	ATPase	1927	769	0.972939
CHD3_H_e22_125.0	ATPase	689	856	0.602338		CHD3_H_e22_125.0	ATPase	994	509	0.75803
CHD3_H_e23_50.0	ATPase	926	832	0.832859		CHD3_H_e23_50.0	ATPase	1449	713	0.789027
CHD4_D_e16_201.15	ATPase	394	17	16.6264		CHD4_D_e16_201.15	ATPase	673	25	10.2974
CHD4_D_e17_138.8	ATPase	710	654	0.81219		CHD4_D_e17_138.8	ATPase	1048	576	0.70631
CHD4_D_e18_55.3	ATPase	1793	87	15.3043		CHD4_D_e18_55.3	ATPase	2585	53	18.8089
CHD4_H_e22_118.4	ATPase	772	63	9.07023		CHD4_H_e22_118.4	ATPase	949	35	10.4173
CHD4_H_e23_125.1	ATPase	623	33	13.8262		CHD4_H_e23_125.1	ATPase	842	76	4.28187
CHD4_H_e24_50.1	ATPase	615	0	615		CHD4_H_e24_50.1	ATPase	859	9	35.5425
CHD5_D_e15_201.32	ATPase	805	817	0.73731		CHD5_D_e15_201.32	ATPase	1227	778	0.612347
CHD5_D_e16_138.10	ATPase	346	270	0.957158		CHD5_D_e16_138.10	ATPase	551	242	0.883058
CHD5_D_e17_59.0	ATPase	1491	1813	0.615708		CHD5_D_e17_59.0	ATPase	2226	1384	0.624621
CHD5_H_e20_95.3	ATPase	442	480	0.688618		CHD5_H_e20_95.3	ATPase	549	193	1.10279
CHD5_H_e21_118.17	ATPase	1370	2057	0.498658		CHD5_H_e21_118.17	ATPase	2189	1307	0.650415
CHD5_H_e22_125.10	ATPase	980	1583	0.463462		CHD5_H_e22_125.10	ATPase	1659	1238	0.520402
CHD5_H_e23_50.4	ATPase	2489	2663	0.699852		CHD5_H_e23_50.4	ATPase	3217	1883	0.66353
CHD6_D_e12_244.11	ATPase	1364	978	1.0438		CHD6_D_e12_244.11	ATPase	2020	746	1.05132
CHD6_D_e13_177.11	ATPase	945	1296	0.545821		CHD6_D_e13_177.11	ATPase	1502	875	0.666528
CHD6_H_e16_105.4	ATPase	746	280	1.99019		CHD6_H_e16_105.4	ATPase	1139	328	1.34736
CHD6_H_e17_196.20	ATPase	651	388	1.25426		CHD6_H_e17_196.20	ATPase	1002	359	1.08306
CHD6_H_e18_47.3	ATPase	2499	1418	1.31927		CHD6_H_e18_47.3	ATPase	3666	1212	1.17463
CHD7_D_e16_118.9	ATPase	1721	635	2.02754		CHD7_D_e16_118.9	ATPase	2587	530	1.89475
CHD7_D_e17_196.1	ATPase	1787	835	1.60149		CHD7_D_e17_196.1	ATPase	2572	930	1.07388
CHD7_H_e12_244.14	ATPase	2437	1239	1.4723		CHD7_H_e12_244.14	ATPase	3989	1023	1.51416
CHD7_H_e13_177.11	ATPase	257	143	1.33907		CHD7_H_e13_177.11	ATPase	500	164	1.18154
CHD8_D_e12_244.18	ATPase	2560	341	5.61057		CHD8_D_e12_244.18	ATPase	3036	251	4.69144
CHD8_D_e13_177.7	ATPase	277	347	0.596607		CHD8_D_e13_177.7	ATPase	555	442	0.487347
CHD8_H_e16_135.0	ATPase	1223	375	2.43783		CHD8_H_e16_135.0	ATPase	1401	165	3.29065
CHD8_H_e17_196.3	ATPase	1655	258	4.79064		CHD8_H_e17_196.3	ATPase	2308	92	9.70437
CHD8_H_e18_52.3	ATPase	1009	1102	0.685313		CHD8_H_e18_52.3	ATPase	1498	961	0.605288
CHD9_D_e12_244.8	ATPase	1865	1261	1.10708		CHD9_D_e12_244.8	ATPase	2943	1067	1.07107
CHD9_D_e13_177.3	ATPase	1145	1256	0.682388		CHD9_D_e13_177.3	ATPase	1736	880	0.765993
CHD9_H_e16_135.3	ATPase	2237	1887	0.887557		CHD9_H_e16_135.3	ATPase	3221	1396	0.896053
CHD9_H_e17_196.11	ATPase	704	364	1.44562		CHD9_H_e17_196.11	ATPase	855	275	1.20606
CHD9_H_e18_50.2	ATPase	1241	1049	0.885443		CHD9_H_e18_50.2	ATPase	2121	860	0.957625
CLOCK_e21_210.10	AT	1534	1305	0.879914		CLOCK_e21_210.10	AT	2436	955	0.990482
CLOCK_e21_210.12	AT	648	730	0.664173		CLOCK_e21_210.12	AT	1346	568	0.919918
CLOCK_e21_210.3	AT	2348	2541	0.691894		CLOCK_e21_210.3	AT	3407	1766	0.749265
CLOCK_e22_203.13	AT	932	565	1.23386		CLOCK_e22_203.13	AT	1450	470	1.19746
CLOCK_e22_203.2	AT	2110	1612	0.979919		CLOCK_e22_203.2	AT	2822	1228	0.892423
CLOCK_e22_203.5	AT	1343	2220	0.452951		CLOCK_e22_203.5	AT	2121	1428	0.576825
CLOCK_e23_256.10	AT	534	655	0.609927		CLOCK_e23_256.10	AT	821	535	0.595694
CLOCK_e23_256.17	AT	656	256	1.91368		CLOCK_e23_256.17	AT	950	328	1.12379
CLOCK_e23_256.6	AT	1178	1225	0.71981		CLOCK_e23_256.6	AT	1441	1017	0.550208
CREBBP_BD_e17_107.0	BD	683	492	1.03817		CREBBP_BD_e17_107.0	BD	1005	332	1.17454
CREBBP_BD_e17_107.5	BD	731	136	4.00376		CREBBP_BD_e17_107.5	BD	1152	142	3.14287
CREBBP_BD_e17_107.6	BD	717	368	1.45634		CREBBP_BD_e17_107.6	BD	1143	317	1.39896
CREBBP_BD_e18_210.14	BD	3319	1942	1.27957		CREBBP_BD_e18_210.14	BD	5143	1863	1.07217
CREBBP_BD_e18_210.15	BD	2042	747	2.04538		CREBBP_BD_e18_210.15	BD	3247	735	1.7152
CREBBP_BD_e18_210.7	BD	454	835	0.406869		CREBBP_BD_e18_210.7	BD	761	432	0.683691
CREBBP_e25_147.2	AT	1203	1316	0.684285		CREBBP_e25_147.2	AT	1846	1290	0.555726
CREBBP_e25_147.7	AT	796	1330	0.448014		CREBBP_e25_147.7	AT	1295	922	0.545388
CREBBP_e25_147.8	AT	2139	998	1.60409		CREBBP_e25_147.8	AT	3164	577	2.12872
CREBBP_e26_114.7	AT	1386	1125	0.922138		CREBBP_e26_114.7	AT	2216	663	1.29763
CREBBP_e26_114.8	AT	639	210	2.27096		CREBBP_e26_114.8	AT	997	186	2.0779
CREBBP_e26_114.9	AT	1584	813	1.45794		CREBBP_e26_114.9	AT	2205	529	1.61802
CREBBP_e27_166.2	AT	594	207	2.14152		CREBBP_e27_166.2	AT	769	295	1.01131
CREBBP_e27_166.7	AT	2585	1448	1.33642		CREBBP_e27_166.7	AT	3839	1013	1.47161
CREBBP_e27_166.8	AT	1639	2132	0.57559		CREBBP_e27_166.8	AT	2573	1793	0.557333
CREBBP_e28_168.12	AT	2214	1128	1.46911		CREBBP_e28_168.12	AT	3196	961	1.29139
CREBBP_e28_168.2	AT	2254	3473	0.485993		CREBBP_e28_168.2	AT	3428	1828	0.728319
CREBBP_e28_168.9	AT	1399	500	2.09253		CREBBP_e28_168.9	AT	2067	342	2.34515
CREBBP_e29_162.10	AT	483	363	0.994534		CREBBP_e29_162.10	AT	653	232	1.09156
CREBBP_e29_162.7	AT	2896	1343	1.61419		CREBBP_e29_162.7	AT	3751	1127	1.29248
CREBBP_e29_162.8	AT	2226	971	1.71572		CREBBP_e29_162.8	AT	2722	724	1.45971
DOT1L_e6_95.2	SET	1044	266	2.93138		DOT1L_e6_95.2	SET	1483	274	2.09954
DOT1L_e6_95.3	SET	2262	690	2.45271		DOT1L_e6_95.3	SET	3409	805	1.64426
DOT1L_e6_95.7	SET	976	365	1.99867		DOT1L_e6_95.7	SET	1511	374	1.5678
DOT1L_e7_63.0	SET	881	388	1.69739		DOT1L_e7_63.0	SET	1760	395	1.72917
DOT1L_e7_63.3	SET	2494	1785	1.04605		DOT1L_e7_63.3	SET	3775	1736	0.844538
DOT1L_e7_63.4	SET	1146	613	1.39852		DOT1L_e7_63.4	SET	1966	677	1.12744
DOT1L_e8_56.0	SET	770	570	1.01046		DOT1L_e8_56.0	SET	1268	426	1.15522
DOT1L_e8_56.1	SET	837	213	2.93289		DOT1L_e8_56.1	SET	1094	271	1.56594
DOT1L_e8_56.3	SET	2992	1315	1.70319		DOT1L_e8_56.3	SET	4102	1260	1.26427
DOT1L_e9_80.5	SET	1198	654	1.37043		DOT1L_e9_80.5	SET	1724	646	1.03608
DOT1L_e9_80.7	SET	1399	774	1.35248		DOT1L_e9_80.7	SET	1839	650	1.09839
DOT1L_e9_80.8	SET	1716	534	2.40349		DOT1L_e9_80.8	SET	2601	476	2.12094
EHMT1_e24_87.1	SET	555	288	1.43962		EHMT1_e24_87.1	SET	785	306	0.995283
EHMT1_e24_87.2	SET	2604	1411	1.38152		EHMT1_e24_87.2	SET	3978	1443	1.07061
EHMT1_e24_87.3	SET	1294	557	1.73768		EHMT1_e24_87.3	SET	1875	620	1.17405
EHMT1_e25_79.0	SET	366	562	0.487125		EHMT1_e25_79.0	SET	540	503	0.416716
EHMT1_e25_79.1	SET	761	387	1.46997		EHMT1_e25_79.1	SET	1302	389	1.2989
EHMT1_e26_176.0	SET	868	748	0.868276		EHMT1_e26_176.0	SET	1240	924	0.521095
EHMT1_e26_176.1	SET	1760	1631	0.807856		EHMT1_e26_176.1	SET	2476	1305	0.736818
EHMT1_e26_176.2	SET	1010	404	1.869		EHMT1_e26_176.2	SET	1283	387	1.28656
EHMT2_e23_87.1	SET	620	516	0.898641		EHMT2_e23_87.1	SET	893	278	1.24609
EHMT2_e23_87.10	SET	2639	1301	1.5184		EHMT2_e23_87.10	SET	3201	828	1.50107
EHMT2_e23_87.11	SET	2442	1078	1.69551		EHMT2_e23_87.11	SET	3634	824	1.71239
EHMT2_e24_79.0	SET	762	786	0.725426		EHMT2_e24_79.0	SET	1119	394	1.10219
EHMT2_e25_176.13	SET	526	411	0.956814		EHMT2_e25_176.13	SET	838	401	0.811014
EHMT2_e25_176.4	SET	1377	1336	0.77154		EHMT2_e25_176.4	SET	2045	1301	0.61043
EHMT2_e25_176.5	SET	1415	1390	0.762048		EHMT2_e25_176.5	SET	2131	1221	0.677765
ELP3_e13_81.0	AT	2960	1063	2.08414		ELP3_e13_81.0	AT	4150	917	1.75729
ELP3_e13_81.1	AT	1813	672	2.01846		ELP3_e13_81.1	AT	2609	564	1.79575
ELP3_e13_81.8	AT	819	154	3.96397		ELP3_e13_81.8	AT	1373	241	2.20955
ELP3_e14_82.0	AT	2099	320	4.90142		ELP3_e14_82.0	AT	3159	363	3.37698
ELP3_e14_82.4	AT	532	306	1.29898		ELP3_e14_82.4	AT	670	200	1.29883
ELP3_e15_58.1	AT	1508	532	2.12008		ELP3_e15_58.1	AT	2501	496	1.95723
ELP3_e15_58.2	AT	1170	1263	0.693425		ELP3_e15_58.2	AT	1705	1015	0.652291
EP300_BD_e17_111.2	BD	1776	1236	1.07556		EP300_BD_e17_111.2	BD	2742	834	1.27658
EP300_BD_e17_111.6	BD	510	116	3.27184		EP300_BD_e17_111.6	BD	664	152	1.69264
EP300_BD_e17_111.7	BD	765	385	1.48536		EP300_BD_e17_111.7	BD	1435	159	3.49739
EP300_BD_e18_196.14	BD	1012	851	0.889904		EP300_BD_e18_196.14	BD	1699	617	1.06902
EP300_BD_e18_196.15	BD	2035	779	1.95472		EP300_BD_e18_196.15	BD	3207	827	1.5057
EP300_BD_e18_196.5	BD	1995	1162	1.28508		EP300_BD_e18_196.5	BD	2994	1034	1.12439
EP300_e25_147.10	AT	1202	535	1.68042		EP300_e25_147.10	AT	1742	373	1.81233
EP300_e25_147.11	AT	1005	745	1.00936		EP300_e25_147.11	AT	1473	547	1.04534
EP300_e25_147.3	AT	1056	505	1.56388		EP300_e25_147.3	AT	1614	406	1.54281
EP300_e26_114.0	AT	2103	1247	1.26237		EP300_e26_114.0	AT	3014	901	1.29891
EP300_e26_114.5	AT	2351	549	3.20304		EP300_e26_114.5	AT	3174	381	3.23287
EP300_e26_114.6	AT	1294	428	2.26051		EP300_e26_114.6	AT	1956	386	1.9665
EP300_e27_166.3	AT	503	150	2.49912		EP300_e27_166.3	AT	723	164	1.70851
EP300_e27_166.6	AT	2124	771	2.06136		EP300_e27_166.6	AT	3253	684	1.84642
EP300_e27_166.7	AT	1170	360	2.42915		EP300_e27_166.7	AT	1834	277	2.56839
EP300_e28_165.12	AT	1554	676	1.71988		EP300_e28_165.12	AT	2402	598	1.55933
EP300_e28_165.2	AT	367	201	1.36248		EP300_e28_165.2	AT	826	122	2.62174
EP300_e28_165.4	AT	2209	744	2.22157		EP300_e28_165.4	AT	3422	633	2.09874
EP300_e29_162.10	AT	1125	421	1.9979		EP300_e29_162.10	AT	1735	355	1.89647
EP300_e29_162.8	AT	2434	1070	1.70258		EP300_e29_162.8	AT	3180	646	1.9111
EP300_e29_162.9	AT	1992	813	1.83347		EP300_e29_162.9	AT	3176	608	2.02791
EP400_D_e14_86.4	ATPase	524	35	10.9785		EP400_D_e14_86.4	ATPase	864	51	6.53127
EP400_D_e15_137.3	ATPase	842	102	6.13775		EP400_D_e15_137.3	ATPase	1253	88	5.50687
EP400_D_e16_170.3	ATPase	597	363	1.22927		EP400_D_e16_170.3	ATPase	836	349	0.929495
EP400_H_e28_170.6	ATPase	906	530	1.27854		EP400_H_e28_170.6	ATPase	1266	353	1.39165
EP400_H_e29_190.15	ATPase	1436	157	6.81808		EP400_H_e29_190.15	ATPase	2036	265	2.9802
ERCC6_D_e7_105.7	ATPase	701	650	0.806824		ERCC6_D_e7_105.7	ATPase	945	452	0.811465
ERCC6_D_e8_136.9	ATPase	1572	753	1.56207		ERCC6_D_e8_136.9	ATPase	2135	581	1.42653
ERCC6_D_e9_171.1	ATPase	1304	2137	0.456873		ERCC6_D_e9_171.1	ATPase	2234	1310	0.662266
ERCC6_H_e13_105.0	ATPase	1323	1278	0.774906		ERCC6_H_e13_105.0	ATPase	2103	895	0.912383
ERCC6_H_e14_111.2	ATPase	2506	2275	0.824767		ERCC6_H_e14_111.2	ATPase	3795	1382	1.06643
ERCC6_H_e15_120.3	ATPase	2338	2821	0.620584		ERCC6_H_e15_120.3	ATPase	3550	2028	0.679871
ERCC6_H_e16_52.2	ATPase	546	500	0.816671		ERCC6_H_e16_52.2	ATPase	798	300	1.03197
EZH1_e17_96.2	SET	490	717	0.511326		EZH1_e17_96.2	SET	806	372	0.840791
EZH1_e17_96.3	SET	831	450	1.38083		EZH1_e17_96.3	SET	1113	290	1.4889
EZH1_e17_96.5	SET	1770	493	2.68498		EZH1_e17_96.5	SET	2642	432	2.3736
EZH1_e18_82.0	SET	2050	848	1.80904		EZH1_e18_82.0	SET	3176	667	1.84863
EZH1_e18_82.1	SET	1401	1865	0.562418		EZH1_e18_82.1	SET	2347	1320	0.690495
EZH1_e19_81.0	SET	1675	1087	1.15335		EZH1_e19_81.0	SET	2304	635	1.40862
EZH1_e19_81.1	SET	743	168	3.29778		EZH1_e19_81.1	SET	1240	146	3.29052
EZH1_e20_85.1	SET	2630	1491	1.32049		EZH1_e20_85.1	SET	3489	1351	1.00293
EZH1_e20_85.2	SET	1858	804	1.72926		EZH1_e20_85.2	SET	2408	746	1.25326
EZH1_e20_85.7	SET	1805	1004	1.34553		EZH1_e20_85.7	SET	2534	891	1.1043
EZH2_e16_96.1	SET	536	256	1.56362		EZH2_e16_96.1	SET	831	313	1.03007
EZH2_e16_96.2	SET	420	508	0.61833		EZH2_e16_96.2	SET	738	419	0.68358
EZH2_e16_96.8	SET	1418	977	1.08623		EZH2_e16_96.8	SET	2213	867	0.991099
EZH2_e19_85.3	SET	379	496	0.571448		EZH2_e19_85.3	SET	575	258	0.864458
GCN5_e11_127.10	AT	1539	1935	0.595476		GCN5_e11_127.10	AT	2098	1046	0.778865
GCN5_e11_127.16	AT	2397	119	14.9924		GCN5_e11_127.16	AT	3480	184	7.33153
GCN5_e11_127.5	AT	1854	316	4.38398		GCN5_e11_127.5	AT	2611	177	5.71783
GCN5_e12_59.0	AT	2518	879	2.14374		GCN5_e12_59.0	AT	3693	639	2.2437
GCN5_e12_59.1	AT	2187	512	3.19461		GCN5_e12_59.1	AT	3116	324	3.73148
GCN5_e12_59.4	AT	1863	538	2.59001		GCN5_e12_59.4	AT	2998	344	3.38168
GTF3C4_e3_131.0	AT	871	658	0.990313		GTF3C4_e3_131.0	AT	1096	321	1.32474
GTF3C4_e3_131.3	AT	2141	2832	0.566087		GTF3C4_e3_131.3	AT	3276	1992	0.638733
GTF3C4_e3_131.4	AT	219	229	0.713945		GTF3C4_e3_131.4	AT	466	154	1.17252
GTF3C4_e4_89.2	AT	1583	673	1.75978		GTF3C4_e4_89.2	AT	2404	661	1.41198
GTF3C4_e4_89.5	AT	633	514	0.921049		GTF3C4_e4_89.5	AT	897	255	1.3644
GTF3C4_e4_89.6	AT	638	384	1.24199		GTF3C4_e4_89.6	AT	1027	414	0.962747
HAT1_e3_76.0	AT	3252	2167	1.12361		HAT1_e3_76.0	AT	4791	1879	0.990282
HAT1_e3_76.1	AT	1776	861	1.54361		HAT1_e3_76.1	AT	2544	640	1.5432
HAT1_e3_76.3	AT	591	273	1.617		HAT1_e3_76.3	AT	700	156	1.73877
HAT1_e4_121.2	AT	1267	795	1.19255		HAT1_e4_121.2	AT	1793	494	1.40884
HAT1_e4_121.4	AT	462	244	1.41382		HAT1_e4_121.4	AT	718	155	1.79496
HAT1_e4_121.5	AT	437	484	0.67521		HAT1_e4_121.5	AT	668	426	0.608584
HAT1_e5_180.0	AT	1580	2380	0.49707		HAT1_e5_180.0	AT	2186	1346	0.630709
HAT1_e5_180.4	AT	2074	970	1.60021		HAT1_e5_180.4	AT	2923	802	1.41512
HAT1_e5_180.9	AT	1053	990	0.796048		HAT1_e5_180.9	AT	1433	725	0.767406
HAT1_e6_73.0	AT	1571	1185	0.992334		HAT1_e6_73.0	AT	2394	815	1.14054
HAT1_e6_73.1	AT	2908	3526	0.617581		HAT1_e6_73.1	AT	4192	2669	0.610041
HBO1_e13_147.4	AT	875	863	0.758743		HBO1_e13_147.4	AT	1477	643	0.891778
HBO1_e14_107.2	AT	1262	600	1.57341		HBO1_e14_107.2	AT	1727	613	1.09372
HBO1_e14_107.4	AT	1232	1520	0.606775		HBO1_e14_107.4	AT	1884	868	0.842784
HBO1_e9_192.3	AT	1972	392	3.76068		HBO1_e9_192.3	AT	2801	387	2.80877
HBO1_e9_192.8	AT	1425	355	3.00017		HBO1_e9_192.8	AT	2074	353	2.27985
HDAC1_e2_113.6	HDAC	2806	1791	1.17296		HDAC1_e2_113.6	HDAC	4398	1512	1.12964
HDAC1_e3_118.4	HDAC	400	358	0.83511		HDAC1_e3_118.4	HDAC	696	178	1.51563
HDAC1_e4_75.0	HDAC	1768	575	2.29998		HDAC1_e4_75.0	HDAC	2720	653	1.61714
HDAC1_e5_139.9	HDAC	2280	1301	1.31184		HDAC1_e5_139.9	HDAC	3165	1217	1.00994
HDAC1_e6_142.2	HDAC	570	304	1.4009		HDAC1_e6_142.2	HDAC	867	300	1.12121
HDAC1_e7_93.0	HDAC	1390	399	2.60436		HDAC1_e7_93.0	HDAC	1899	547	1.34765
HDAC1_e8_109.7	HDAC	595	174	2.55021		HDAC1_e8_109.7	HDAC	746	129	2.23971
HDAC1_e9_140.6	HDAC	1373	923	1.11325		HDAC1_e9_140.6	HDAC	2216	805	1.06884
HDAC10_e10_90.12	HDAC	518	469	0.825921		HDAC10_e10_90.12	HDAC	965	329	1.13807
HDAC10_e11_107.3	HDAC	825	582	1.06034		HDAC10_e11_107.3	HDAC	1115	554	0.781286
HDAC10_e5_105.11	HDAC	1440	1004	1.07344		HDAC10_e5_105.11	HDAC	2178	668	1.26584
HDAC10_e6_69.8	HDAC	1687	1318	0.958136		HDAC10_e6_69.8	HDAC	2335	944	0.960474
HDAC10_e7_127.17	HDAC	646	847	0.570742		HDAC10_e7_127.17	HDAC	772	563	0.532303
HDAC10_e8_66.0	HDAC	1080	604	1.33759		HDAC10_e8_66.0	HDAC	1574	622	0.98241
HDAC10_e9_60.4	HDAC	894	731	0.91506		HDAC10_e9_60.4	HDAC	1179	530	0.863513
HDAC11_e3_101.12	HDAC	1335	1019	0.980533		HDAC11_e3_101.12	HDAC	1915	641	1.15984
HDAC11_e4_117.8	HDAC	1518	1796	0.632789		HDAC11_e4_117.8	HDAC	2502	1381	0.703592
HDAC11_e5_43.3	HDAC	941	1202	0.585988		HDAC11_e5_43.3	HDAC	1345	783	0.666952
HDAC11_e6_77.6	HDAC	2214	1195	1.38679		HDAC11_e6_77.6	HDAC	3263	1081	1.17215
HDAC11_e7_63.4	HDAC	908	601	1.13017		HDAC11_e7_63.4	HDAC	1426	525	1.05436
HDAC11_e8_97.1	HDAC	1485	2044	0.543952		HDAC11_e8_97.1	HDAC	2343	1406	0.647167
HDAC11_e9_118.3	HDAC	1478	1078	1.02619		HDAC11_e9_118.3	HDAC	1957	943	0.805842
HDAC2_e5_139.3	HDAC	889	794	0.837811		HDAC2_e5_139.3	HDAC	1382	592	0.906256
HDAC2_e6_140.2	HDAC	796	434	1.37135		HDAC2_e6_140.2	HDAC	1372	283	1.88071
HDAC2_e7_93.1	HDAC	1058	807	0.981033		HDAC2_e7_93.1	HDAC	1490	535	1.0811
HDAC2_e8_109.3	HDAC	702	704	0.746066		HDAC2_e8_109.3	HDAC	979	548	0.693496
HDAC2_e9_140.4	HDAC	1267	585	1.62009		HDAC2_e9_140.4	HDAC	1880	511	1.42809
HDAC3_e10_65.1	HDAC	2213	691	2.39611		HDAC3_e10_65.1	HDAC	3480	574	2.35355
HDAC3_e11_90.1	HDAC	1704	546	2.3343		HDAC3_e11_90.1	HDAC	2568	482	2.06799
HDAC3_e6_56.1	HDAC	1367	1147	0.892064		HDAC3_e6_56.1	HDAC	1921	730	1.0217
HDAC3_e7_134.16	HDAC	1915	467	3.06641		HDAC3_e7_134.16	HDAC	2514	509	1.91719
HDAC3_e8_81.4	HDAC	1221	459	1.98916		HDAC3_e8_81.4	HDAC	1674	454	1.43112
HDAC3_e9_74.6	HDAC	699	476	1.09815		HDAC3_e9_74.6	HDAC	968	403	0.932183
HDAC4_e19_56.3	HDAC	2250	2295	0.734062		HDAC4_e19_56.3	HDAC	3594	2002	0.697235
HDAC4_e20_88.1	HDAC	1027	1662	0.462613		HDAC4_e20_88.1	HDAC	1456	950	0.595127
HDAC4_e21_120.2	HDAC	2472	2616	0.707556		HDAC4_e21_120.2	HDAC	3735	1924	0.753958
HDAC4_e22_98.4	HDAC	644	992	0.485871		HDAC4_e22_98.4	HDAC	1004	527	0.739524
HDAC4_e23_119.4	HDAC	540	664	0.60843		HDAC4_e23_119.4	HDAC	913	410	0.864221
HDAC5_e20_56.2	HDAC	2309	1797	0.961987		HDAC5_e20_56.2	HDAC	3207	1120	1.11194
HDAC5_e21_88.3	HDAC	1868	534	2.61638		HDAC5_e21_88.3	HDAC	2977	855	1.35196
HDAC5_e22_120.11	HDAC	442	382	0.864933		HDAC5_e22_120.11	HDAC	511	214	0.92591
HDAC5_e23_97.7	HDAC	964	693	1.04076		HDAC5_e23_97.7	HDAC	1249	598	0.810828
HDAC5_e24_119.10	HDAC	989	226	3.26682		HDAC5_e24_119.10	HDAC	1604	300	2.07429
HDAC5_e25_134.18	HDAC	1203	575	1.56497		HDAC5_e25_134.18	HDAC	1588	577	1.06839
HDAC6_a1_e10_69.4	HDAC	1060	622	1.27487		HDAC6_a1_e10_69.4	HDAC	1879	571	1.27745
HDAC6_a1_e11_127.22	HDAC	707	311	1.69859		HDAC6_a1_e11_127.22	HDAC	982	305	1.24913
HDAC6_a1_e12_66.0	HDAC	702	349	1.50333		HDAC6_a1_e12_66.0	HDAC	978	298	1.27323
HDAC6_a1_e13_60.3	HDAC	1504	1080	1.04231		HDAC6_a1_e13_60.3	HDAC	2516	825	1.18414
HDAC6_a1_e14_90.1	HDAC	1540	748	1.54049		HDAC6_a1_e14_90.1	HDAC	2200	943	0.905903
HDAC6_a1_e8_98.7	HDAC	1531	1175	0.975293		HDAC6_a1_e8_98.7	HDAC	2357	841	1.08821
HDAC6_a1_e9_105.4	HDAC	986	489	1.50792		HDAC6_a1_e9_105.4	HDAC	1532	460	1.29266
HDAC6_a2_e20_134.7	HDAC	840	752	0.835802		HDAC6_a2_e20_134.7	HDAC	1300	706	0.714906
HDAC6_a2_e21_69.4	HDAC	2837	1456	1.45864		HDAC6_a2_e21_69.4	HDAC	3757	865	1.68647
HDAC6_a2_e22_193.13	HDAC	748	423	1.32211		HDAC6_a2_e22_193.13	HDAC	1029	388	1.0292
HDAC6_a2_e23_150.7	HDAC	1662	1287	0.966661		HDAC6_a2_e23_150.7	HDAC	2380	939	0.984195
HDAC6_a2_e24_175.10	HDAC	404	266	1.13437		HDAC6_a2_e24_175.10	HDAC	551	268	0.797512
HDAC7_e14_134.17	HDAC	402	64	4.65016		HDAC7_e14_134.17	HDAC	553	66	3.2358
HDAC7_e15_121.13	HDAC	1421	415	2.55998		HDAC7_e15_121.13	HDAC	2318	389	2.31249
HDAC7_e16_50.6	HDAC	651	902	0.540118		HDAC7_e16_50.6	HDAC	1025	609	0.6534
HDAC7_e17_108.0	HDAC	1088	959	0.849074		HDAC7_e17_108.0	HDAC	1495	748	0.776003
HDAC7_e18_56.0	HDAC	1798	747	1.80098		HDAC7_e18_56.0	HDAC	2814	660	1.65529
HDAC7_e19_88.1	HDAC	1196	504	1.77472		HDAC7_e19_88.1	HDAC	1990	329	2.3469
HDAC7_e20_120.12	HDAC	1109	626	1.32529		HDAC7_e20_120.12	HDAC	1583	566	1.08572
HDAC7_e21_98.10	HDAC	729	440	1.23883		HDAC7_e21_98.10	HDAC	1112	249	1.73212
HDAC7_e22_119.18	HDAC	726	300	1.80803		HDAC7_e22_119.18	HDAC	1114	287	1.50579
HDAC8_e3_131.7	HDAC	1589	2369	0.502222		HDAC8_e3_131.7	HDAC	2649	1551	0.663301
HDAC8_e4_142.12	HDAC	1819	2668	0.510504		HDAC8_e4_142.12	HDAC	2761	1639	0.654235
HDAC8_e5_113.2	HDAC	519	652	0.595519		HDAC8_e5_113.2	HDAC	648	512	0.491275
HDAC8_e6_78.4	HDAC	1840	1498	0.919525		HDAC8_e6_78.4	HDAC	2629	1154	0.884684
HDAC8_e7_109.1	HDAC	1287	1847	0.521687		HDAC8_e7_109.1	HDAC	1890	1378	0.532647
HDAC8_e8_173.14	HDAC	2364	2557	0.692252		HDAC8_e8_173.14	HDAC	3668	1918	0.742749
HDAC9_e17_56.1	HDAC	759	904	0.62833		HDAC9_e17_56.1	HDAC	1138	870	0.5079
HDAC9_e19_120.1	HDAC	1802	2073	0.650838		HDAC9_e19_120.1	HDAC	2884	1541	0.726829
HDAC9_e19_120.7	HDAC	290	371	0.584282		HDAC9_e19_120.7	HDAC	538	191	1.09198
HDAC9_e20_98.7	HDAC	2581	2180	0.886455		HDAC9_e20_98.7	HDAC	3430	1909	0.697829
HDAC9_e21_119.13	HDAC	659	737	0.669039		HDAC9_e21_119.13	HDAC	1273	582	0.849112
HDAC9_e22_134.4	HDAC	2183	1903	0.858852		HDAC9_e22_134.4	HDAC	3137	1413	0.862189
HELLS_D_e10_144.9	ATPase	1186	1974	0.449829		HELLS_D_e10_144.9	ATPase	1770	1290	0.532847
HELLS_D_e11_135.2	ATPase	1297	616	1.57509		HELLS_D_e11_135.2	ATPase	2035	430	1.83676
HELLS_D_e9_190.7	ATPase	1881	1325	1.06268		HELLS_D_e9_190.7	ATPase	2426	1186	0.794352
HELLS_H_e18_120.2	ATPase	1415	1846	0.573882		HELLS_H_e18_120.2	ATPase	1907	1345	0.55062
HELLS_H_e19_117.1	ATPase	397	211	1.40425		HELLS_H_e19_117.1	ATPase	605	170	1.37932
HELLS_H_e20_73.0	ATPase	790	354	1.66794		HELLS_H_e20_73.0	ATPase	1066	328	1.26101
HIF1AN_e2_251.15	hydroxylase	804	882	0.682171		HIF1AN_e2_251.15	hydroxylase	1041	370	1.0918
HIF1AN_e2_251.26	hydroxylase	2229	1366	1.22151		HIF1AN_e2_251.26	hydroxylase	3619	1082	1.29884
HIF1AN_e2_251.6	hydroxylase	1186	932	0.952345		HIF1AN_e2_251.6	hydroxylase	1910	767	0.966869
HIF1AN_e3_149.1	hydroxylase	886	299	2.21386		HIF1AN_e3_149.1	hydroxylase	1251	365	1.33
HIF1AN_e4_146.7	hydroxylase	1318	695	1.41885		HIF1AN_e4_146.7	hydroxylase	1890	408	1.79778
HIF1AN_e4_146.8	hydroxylase	1666	833	1.49663		HIF1AN_e4_146.8	hydroxylase	2560	722	1.37663
HIF1AN_e4_146.9	hydroxylase	507	345	1.0983		HIF1AN_e4_146.9	hydroxylase	755	199	1.47094
HLTF_D_e15_144.6	ATPase	910	1324	0.514496		HLTF_D_e15_144.6	ATPase	1530	950	0.625374
HLTF_D_e16_139.7	ATPase	802	964	0.622636		HLTF_D_e16_139.7	ATPase	1422	755	0.731271
HLTF_H_e23_181.0	ATPase	2215	3290	0.504143		HLTF_H_e23_181.0	ATPase	3157	2272	0.539686
HLTF_H_e23_181.1	ATPase	2032	2578	0.590186		HLTF_H_e23_181.1	ATPase	2991	2011	0.577657
HLTF_H_e23_181.2	ATPase	1372	857	1.19803		HLTF_H_e23_181.2	ATPase	1737	655	1.02956
HLTF_H_e24_81.1	ATPase	1998	1752	0.853788		HLTF_H_e24_81.1	ATPase	2912	1247	0.906857
HR_e17_165.23	hydroxylase	593	702	0.632017		HR_e17_165.23	hydroxylase	790	455	0.673898
HR_e17_165.25	hydroxylase	3977	3708	0.803161		HR_e17_165.25	hydroxylase	5911	2340	0.981121
HR_e17_165.26	hydroxylase	3888	3529	0.825005		HR_e17_165.26	hydroxylase	5738	2262	0.985242
HR_e18_129.18	hydroxylase	1500	1501	0.748115		HR_e18_129.18	hydroxylase	2340	1434	0.633722
HR_e18_129.2	hydroxylase	1672	2237	0.559628		HR_e18_129.2	hydroxylase	2398	1419	0.656292
HR_e18_129.3	hydroxylase	972	1312	0.554573		HR_e18_129.3	hydroxylase	1495	1027	0.56527
HSPBAP1_e3_182.1	hydroxylase	1284	1362	0.705706		HSPBAP1_e3_182.1	hydroxylase	1609	877	0.712383
HSPBAP1_e3_182.7	hydroxylase	1207	652	1.38495		HSPBAP1_e3_182.7	hydroxylase	1617	701	0.895573
HSPBAP1_e3_182.8	hydroxylase	421	265	1.18655		HSPBAP1_e3_182.8	hydroxylase	572	244	0.909211
HSPBAP1_e4_137.11	hydroxylase	1626	1341	0.907661		HSPBAP1_e4_137.11	hydroxylase	2691	1120	0.933027
HSPBAP1_e4_137.15	hydroxylase	1265	1023	0.925489		HSPBAP1_e4_137.15	hydroxylase	1825	733	0.96667
HSPBAP1_e4_137.7	hydroxylase	2434	2055	0.886798		HSPBAP1_e4_137.7	hydroxylase	3549	1959	0.703615
HSPBAP1_e5_172.2	hydroxylase	626	471	0.993889		HSPBAP1_e5_172.2	hydroxylase	1119	340	1.27704
HSPBAP1_e5_172.4	hydroxylase	2095	2680	0.585332		HSPBAP1_e5_172.4	hydroxylase	3171	2148	0.573367
HSPBAP1_e5_172.8	hydroxylase	2716	1921	1.05854		HSPBAP1_e5_172.8	hydroxylase	3781	1319	1.11323
INO80_D_e13_81.3	ATPase	830	625	0.993464		INO80_D_e13_81.3	ATPase	1220	379	1.24918
INO80_D_e14_96.3	ATPase	1003	541	1.38668		INO80_D_e14_96.3	ATPase	1346	363	1.43888
INO80_D_e15_60.2	ATPase	2798	3252	0.644275		INO80_D_e15_60.2	ATPase	3775	2360	0.621274
INO80_D_e16_143.11	ATPase	1233	810	1.13907		INO80_D_e16_143.11	ATPase	2126	657	1.25629
INO80_H_e27_128.7	ATPase	1160	505	1.7179		INO80_H_e27_128.7	ATPase	1957	318	2.38772
INO80_H_e28_95.5	ATPase	1235	1421	0.650607		INO80_H_e28_95.5	ATPase	1801	1127	0.620568
INO80_H_e29_73.0	ATPase	758	517	1.09654		INO80_H_e29_73.0	ATPase	1157	368	1.22005
INO80_H_e30_95.11	ATPase	196	61	2.37739		INO80_H_e30_95.11	ATPase	294	70	1.62254
JARID2_e12_115.1	hydroxylase	1851	1569	0.883183		JARID2_e12_115.1	hydroxylase	2670	956	1.08449
JARID2_e12_115.8	hydroxylase	757	838	0.675987		JARID2_e12_115.8	hydroxylase	1088	773	0.546488
JARID2_e13_106.4	hydroxylase	1519	699	1.62589		JARID2_e13_106.4	hydroxylase	1878	592	1.23151
JARID2_e13_106.5	hydroxylase	2023	1119	1.35316		JARID2_e13_106.5	hydroxylase	3026	1033	1.13751
JARID2_e14_158.16	hydroxylase	812	432	1.40538		JARID2_e14_158.16	hydroxylase	1279	391	1.26944
JARID2_e14_158.20	hydroxylase	1222	1059	0.86366		JARID2_e14_158.20	hydroxylase	1755	1042	0.654029
JMJD1C_e21_131.3	hydroxylase	2894	3507	0.617937		JMJD1C_e21_131.3	hydroxylase	4068	2762	0.572065
JMJD1C_e21_131.4	hydroxylase	1271	877	1.08455		JMJD1C_e21_131.4	hydroxylase	2263	844	1.0411
JMJD1C_e21_131.6	hydroxylase	808	568	1.06406		JMJD1C_e21_131.6	hydroxylase	1171	371	1.22484
JMJD1C_e22_86.0	hydroxylase	1244	528	1.76216		JMJD1C_e22_86.0	hydroxylase	1979	636	1.20802
JMJD1C_e22_86.1	hydroxylase	958	575	1.24625		JMJD1C_e22_86.1	hydroxylase	1227	379	1.25635
JMJD1C_e22_86.2	hydroxylase	1130	715	1.18248		JMJD1C_e22_86.2	hydroxylase	1678	778	0.837423
JMJD4_E1_139.0	hydroxylase	943	515	1.36945		JMJD4_E1_139.0	hydroxylase	1327	473	1.08894
JMJD4_E1_139.14	hydroxylase	1671	1206	1.03713		JMJD4_E1_139.14	hydroxylase	2614	848	1.19691
JMJD4_E2_166.20	hydroxylase	1433	637	1.68295		JMJD4_E2_166.20	hydroxylase	1950	632	1.19784
JMJD4_E3_126.0	hydroxylase	1865	1733	0.805688		JMJD4_E3_126.0	hydroxylase	3040	1650	0.715545
JMJD4_E3_126.7	hydroxylase	630	488	0.965448		JMJD4_E3_126.7	hydroxylase	1151	387	1.15419
JMJD4_E4_268.37	hydroxylase	1807	1549	0.873316		JMJD4_E4_268.37	hydroxylase	2745	1110	0.960322
JMJD4_E4_268.42	hydroxylase	1706	1329	0.960912		JMJD4_E4_268.42	hydroxylase	2370	1114	0.826154
JMJD6_e3_280.11	hydroxylase	1171	325	2.69245		JMJD6_e3_280.11	hydroxylase	1577	302	2.02589
JMJD6_e3_280.3	hydroxylase	1626	539	2.25633		JMJD6_e3_280.3	hydroxylase	2595	573	1.75808
JMJD6_e3_280.45	hydroxylase	1566	984	1.19108		JMJD6_e3_280.45	hydroxylase	2284	977	0.907775
JMJD6_e4_52.0	hydroxylase	1873	832	1.6846		JMJD6_e4_52.0	hydroxylase	2607	602	1.68118
JMJD7_e2_95.10	hydroxylase	558	618	0.675451		JMJD7_e2_95.10	hydroxylase	743	587	0.491375
JMJD7_e3_254.41	hydroxylase	969	987	0.73477		JMJD7_e3_254.41	hydroxylase	1395	1035	0.523384
JMJD7_e4_57.0	hydroxylase	1487	1924	0.578644		JMJD7_e4_57.0	hydroxylase	2229	1370	0.631853
JMJD7_e5_96.4	hydroxylase	1367	1209	0.846345		JMJD7_e5_96.4	hydroxylase	1756	901	0.756766
JMJD7_e6_77.10	hydroxylase	734	431	1.27332		JMJD7_e6_77.10	hydroxylase	1044	382	1.06058
JMJD8_E3_49.6	hydroxylase	1668	717	1.7406		JMJD8_E3_49.6	hydroxylase	2763	596	1.7997
JMJD8_E4_97.12	hydroxylase	588	170	2.57925		JMJD8_E4_97.12	hydroxylase	830	182	1.76779
JMJD8_E5_69.9	hydroxylase	889	614	1.08312		JMJD8_E5_69.9	hydroxylase	1423	549	1.00618
JMJD8_E6_120.1	hydroxylase	565	270	1.56299		JMJD8_E6_120.1	hydroxylase	704	175	1.55927
JMJD8_E7_68.4	hydroxylase	1176	653	1.34732		JMJD8_E7_68.4	hydroxylase	1786	632	1.0971
JMJD8_E9_30.0	hydroxylase	1608	810	1.4855		JMJD8_E9_30.0	hydroxylase	2890	495	2.26622
KAT2A_BD_e17_64.2	BD	947	669	1.05904		KAT2A_BD_e17_64.2	BD	1513	614	0.956633
KAT2A_BD_e17_64.4	BD	1564	785	1.49083		KAT2A_BD_e17_64.4	BD	2337	690	1.31497
KAT2A_BD_e17_64.6	BD	2731	603	3.38797		KAT2A_BD_e17_64.6	BD	3709	709	2.03106
KAT2A_BD_e18_158.15	BD	798	279	2.13653		KAT2A_BD_e18_158.15	BD	1451	229	2.45723
KAT2A_BD_e18_158.19	BD	1772	791	1.6763		KAT2A_BD_e18_158.19	BD	2391	517	1.7952
KAT2A_BD_e18_158.5	BD	619	214	2.15891		KAT2A_BD_e18_158.5	BD	1003	161	2.41423
KAT2B_BD_e17_85.0	BD	1957	1203	1.21767		KAT2B_BD_e17_85.0	BD	2894	1457	0.771387
KAT2B_BD_e17_85.3	BD	2229	1781	0.936996		KAT2B_BD_e17_85.3	BD	3233	1313	0.956229
KAT2B_BD_e17_85.8	BD	1790	1655	0.809716		KAT2B_BD_e17_85.8	BD	2849	1291	0.857008
KAT2B_BD_e18_190.12	BD	2230	3448	0.484304		KAT2B_BD_e18_190.12	BD	3936	2628	0.581721
KAT2B_BD_e18_190.13	BD	3240	2274	1.06681		KAT2B_BD_e18_190.13	BD	4960	1613	1.19424
KAT2B_BD_e18_190.14	BD	2480	2065	0.899184		KAT2B_BD_e18_190.14	BD	3372	1550	0.844883
KDM1A_e11_140.8	hydroxylase	2181	1323	1.23403		KDM1A_e11_140.8	hydroxylase	3493	755	1.79629
KDM1A_e13_135.3	hydroxylase	629	233	2.01547		KDM1A_e13_135.3	hydroxylase	955	120	3.08154
KDM1A_e14_112.1	hydroxylase	1354	535	1.89292		KDM1A_e14_112.1	hydroxylase	2174	428	1.97138
KDM1A_e15_133.6	hydroxylase	1325	435	2.27748		KDM1A_e15_133.6	hydroxylase	2074	443	1.81708
KDM1A_e16_188.13	hydroxylase	782	484	1.20827		KDM1A_e16_188.13	hydroxylase	1054	374	1.09362
KDM1A_e17_115.1	hydroxylase	1784	1327	1.00636		KDM1A_e17_115.1	hydroxylase	2997	975	1.1936
KDM1A_e18_128.5	hydroxylase	1654	932	1.32814		KDM1A_e18_128.5	hydroxylase	2641	875	1.17197
KDM1A_e19_147.2	hydroxylase	2429	462	3.93148		KDM1A_e19_147.2	hydroxylase	4105	443	3.59648
KDM1A_e8_82.0	hydroxylase	1444	1939	0.557566		KDM1A_e8_82.0	hydroxylase	2352	1303	0.700992
KDM1A_e9_95.4	hydroxylase	2576	1560	1.2362		KDM1A_e9_95.4	hydroxylase	3588	1219	1.14304
KDM1B_e11_138.6	hydroxylase	1462	838	1.30554		KDM1B_e11_138.6	hydroxylase	1773	733	0.939126
KDM1B_e12_132.8	hydroxylase	1340	825	1.21543		KDM1B_e12_132.8	hydroxylase	2195	727	1.17224
KDM1B_e13_75.2	hydroxylase	1531	1188	0.964627		KDM1B_e13_75.2	hydroxylase	2497	1037	0.935032
KDM1B_e14_117.3	hydroxylase	505	222	1.69805		KDM1B_e14_117.3	hydroxylase	784	165	1.84145
KDM1B_e15_126.10	hydroxylase	260	433	0.448962		KDM1B_e15_126.10	hydroxylase	457	378	0.469167
KDM1B_e16_123.4	hydroxylase	679	755	0.672925		KDM1B_e16_123.4	hydroxylase	836	489	0.663593
KDM1B_e17_153.11	hydroxylase	2122	2757	0.576322		KDM1B_e17_153.11	hydroxylase	3483	2193	0.616861
KDM2A_E10_56.0	hydroxylase	1070	707	1.13235		KDM2A_E10_56.0	hydroxylase	1653	584	1.0988
KDM2A_E10_56.4	hydroxylase	691	194	2.65752		KDM2A_E10_56.4	hydroxylase	1080	270	1.55162
KDM2A_E8_93.0	hydroxylase	1274	1431	0.666464		KDM2A_E8_93.0	hydroxylase	1691	1084	0.60577
KDM2A_E8_93.6	hydroxylase	1834	1013	1.35501		KDM2A_E8_93.6	hydroxylase	2849	917	1.20639
KDM2A_E9_154.1	hydroxylase	2098	1027	1.52895		KDM2A_E9_154.1	hydroxylase	3333	718	1.80229
KDM2A_E9_154.10	hydroxylase	516	254	1.51709		KDM2A_E9_154.10	hydroxylase	641	230	1.0808
KDM2B_e6_107.0	hydroxylase	1388	284	3.65091		KDM2B_e6_107.0	hydroxylase	1892	276	2.6592
KDM2B_e6_107.3	hydroxylase	1210	478	1.89301		KDM2B_e6_107.3	hydroxylase	1877	539	1.3518
KDM2B_e6_107.7	hydroxylase	2033	592	2.56886		KDM2B_e6_107.7	hydroxylase	3297	473	2.70552
KDM2B_e7_94.10	hydroxylase	1917	380	3.77101		KDM2B_e7_94.10	hydroxylase	2834	330	3.33215
KDM2B_e7_94.3	hydroxylase	2382	610	2.92115		KDM2B_e7_94.3	hydroxylase	3796	638	2.30989
KDM3A_e21_131.0	hydroxylase	1778	1050	1.26738		KDM3A_e21_131.0	hydroxylase	2746	749	1.42345
KDM3A_e21_131.1	hydroxylase	533	228	1.74519		KDM3A_e21_131.1	hydroxylase	816	186	1.70067
KDM3A_e21_131.13	hydroxylase	1476	1602	0.689756		KDM3A_e21_131.13	hydroxylase	2352	1118	0.816947
KDM3A_e22_95.1	hydroxylase	1038	901	0.862156		KDM3A_e22_95.1	hydroxylase	1563	607	0.999636
KDM3A_e22_95.4	hydroxylase	1577	680	1.73508		KDM3A_e22_95.4	hydroxylase	2295	698	1.27654
KDM3A_e22_95.5	hydroxylase	1875	2505	0.560452		KDM3A_e22_95.5	hydroxylase	2608	1782	0.568401
KDM3B_e19_131.11	hydroxylase	3224	1035	2.33139		KDM3B_e19_131.11	hydroxylase	4641	845	2.13258
KDM3B_e19_131.2	hydroxylase	674	404	1.24724		KDM3B_e19_131.2	hydroxylase	990	288	1.33354
KDM3B_e19_131.7	hydroxylase	1881	553	2.54419		KDM3B_e19_131.7	hydroxylase	2578	452	2.21371
KDM3B_e20_86.1	hydroxylase	1404	1455	0.722362		KDM3B_e20_86.1	hydroxylase	2084	818	0.989208
KDM4A_e5_95.0	hydroxylase	2250	1220	1.38048		KDM4A_e5_95.0	hydroxylase	3416	1002	1.32383
KDM4A_e6_50.2	hydroxylase	682	204	2.49481		KDM4A_e6_50.2	hydroxylase	892	224	1.54424
KDM4A_e6_50.3	hydroxylase	420	148	2.1148		KDM4A_e6_50.3	hydroxylase	423	101	1.62069
KDM4A_e7_104.4	hydroxylase	546	361	1.13047		KDM4A_e7_104.4	hydroxylase	970	437	0.861497
KDM4A_e7_104.5	hydroxylase	403	190	1.5824		KDM4A_e7_104.5	hydroxylase	578	103	2.17173
KDM4A_e8_95.6	hydroxylase	845	739	0.855553		KDM4A_e8_95.6	hydroxylase	1362	625	0.846012
KDM4A_e8_95.8	hydroxylase	1481	657	1.68643		KDM4A_e8_95.8	hydroxylase	2357	551	1.66055
KDM4B_e6_106.0	hydroxylase	1239	1019	0.910023		KDM4B_e6_106.0	hydroxylase	1943	854	0.883419
KDM4B_e6_106.11	hydroxylase	1007	641	1.17527		KDM4B_e6_106.11	hydroxylase	1727	373	1.79672
KDM4B_e7_50.1	hydroxylase	321	366	0.655557		KDM4B_e7_50.1	hydroxylase	423	224	0.7323
KDM4B_e7_50.4	hydroxylase	461	310	1.11113		KDM4B_e7_50.4	hydroxylase	667	275	0.94087
KDM4B_e8_104.11	hydroxylase	1261	1343	0.702864		KDM4B_e8_104.11	hydroxylase	1791	989	0.703199
KDM4B_e8_104.12	hydroxylase	651	1188	0.410171		KDM4B_e8_104.12	hydroxylase	991	628	0.612625
KDM4B_e8_104.5	hydroxylase	1408	637	1.65359		KDM4B_e8_104.5	hydroxylase	2187	533	1.59278
KDM4B_e9_96.5	hydroxylase	1029	387	1.98765		KDM4B_e9_96.5	hydroxylase	1425	474	1.16689
KDM4B_e9_96.6	hydroxylase	1676	1307	0.959896		KDM4B_e9_96.6	hydroxylase	2396	989	0.940739
KDM4B_e9_96.7	hydroxylase	1024	863	0.887946		KDM4B_e9_96.7	hydroxylase	1401	595	0.914086
KDM4C_e5_106.1	hydroxylase	1360	1417	0.718479		KDM4C_e5_106.1	hydroxylase	2032	1007	0.783567
KDM4C_e5_106.7	hydroxylase	1130	912	0.92726		KDM4C_e5_106.7	hydroxylase	1783	799	0.866449
KDM4C_e6_50.0	hydroxylase	1329	1250	0.795846		KDM4C_e6_50.0	hydroxylase	1935	852	0.881846
KDM4C_e6_50.1	hydroxylase	320	459	0.521319		KDM4C_e6_50.1	hydroxylase	700	419	0.648382
KDM4C_e6_50.2	hydroxylase	2172	1282	1.26821		KDM4C_e6_50.2	hydroxylase	3396	1105	1.19344
KDM4C_e7_104.5	hydroxylase	4215	3827	0.824762		KDM4C_e7_104.5	hydroxylase	6328	2447	1.00441
KDM4C_e7_104.6	hydroxylase	2016	1628	0.927066		KDM4C_e7_104.6	hydroxylase	2897	1013	1.11051
KDM4C_e7_104.8	hydroxylase	1304	1627	0.600018		KDM4C_e7_104.8	hydroxylase	1889	879	0.83445
KDM4C_e8_96.1	hydroxylase	1377	938	1.09865		KDM4C_e8_96.1	hydroxylase	2192	965	0.882039
KDM4C_e8_96.5	hydroxylase	1035	778	0.995445		KDM4C_e8_96.5	hydroxylase	1743	613	1.10385
KDM4D_e3_349.26	hydroxylase	279	507	0.411557		KDM4D_e3_349.26	hydroxylase	539	264	0.791946
KDM4D_e3_349.27	hydroxylase	1156	668	1.2947		KDM4D_e3_349.27	hydroxylase	1752	592	1.14889
KDM4D_e3_349.33	hydroxylase	2874	2442	0.881216		KDM4D_e3_349.33	hydroxylase	4356	1564	1.08166
KDM4D_e3_349.39	hydroxylase	1162	1580	0.550576		KDM4D_e3_349.39	hydroxylase	1873	1198	0.607141
KDM4D_e3_349.45	hydroxylase	889	1152	0.577619		KDM4D_e3_349.45	hydroxylase	1312	894	0.569845
KDM4D_e3_349.63	hydroxylase	915	970	0.705974		KDM4D_e3_349.63	hydroxylase	1178	552	0.828419
KDM5A_e11_79.1	hydroxylase	3697	4624	0.598736		KDM5A_e11_79.1	hydroxylase	5861	3655	0.622856
KDM5A_e12_163.16	hydroxylase	1185	1294	0.6855		KDM5A_e12_163.16	hydroxylase	1887	889	0.824195
KDM5A_e12_163.5	hydroxylase	1083	1440	0.563008		KDM5A_e12_163.5	hydroxylase	1643	840	0.759463
KDM5A_e12_163.8	hydroxylase	1380	1147	0.900547		KDM5A_e12_163.8	hydroxylase	2341	1115	0.815314
KDM5A_e13_120.2	hydroxylase	1684	1101	1.14481		KDM5A_e13_120.2	hydroxylase	2435	1032	0.916231
KDM5A_e13_120.7	hydroxylase	991	801	0.925784		KDM5A_e13_120.7	hydroxylase	1518	836	0.705039
KDM5B_e11_86.2	hydroxylase	1637	483	2.53456		KDM5B_e11_86.2	hydroxylase	2450	348	2.73182
KDM5B_e11_86.5	hydroxylase	510	156	2.43691		KDM5B_e11_86.5	hydroxylase	766	83	3.56839
KDM5B_e12_163.12	hydroxylase	1872	1363	1.02812		KDM5B_e12_163.12	hydroxylase	2914	962	1.17622
KDM5B_e12_163.13	hydroxylase	1206	785	1.14958		KDM5B_e12_163.13	hydroxylase	1897	531	1.38677
KDM5B_e12_163.17	hydroxylase	1815	891	1.52443		KDM5B_e12_163.17	hydroxylase	2691	772	1.3534
KDM5B_e13_120.0	hydroxylase	484	604	0.599438		KDM5B_e13_120.0	hydroxylase	770	502	0.595388
KDM5B_e13_120.1	hydroxylase	575	569	0.75589		KDM5B_e13_120.1	hydroxylase	1002	376	1.03414
KDM5B_e13_120.2	hydroxylase	1202	827	1.08763		KDM5B_e13_120.2	hydroxylase	2099	539	1.51168
KDM5C_e11_95.9	hydroxylase	626	712	0.657828		KDM5C_e11_95.9	hydroxylase	891	410	0.843397
KDM5C_e12_163.1	hydroxylase	3036	1793	1.26769		KDM5C_e12_163.1	hydroxylase	4859	1259	1.49878
KDM5C_e12_163.15	hydroxylase	663	297	1.66778		KDM5C_e12_163.15	hydroxylase	887	327	1.05247
KDM5C_e12_163.18	hydroxylase	1650	1005	1.22876		KDM5C_e12_163.18	hydroxylase	2376	928	0.994182
KDM5C_e13_120.10	hydroxylase	661	339	1.4572		KDM5C_e13_120.10	hydroxylase	956	201	1.84405
KDM5C_e13_120.3	hydroxylase	583	205	2.12229		KDM5C_e13_120.3	hydroxylase	1062	362	1.13841
KDM5C_e13_120.6	hydroxylase	775	1016	0.570903		KDM5C_e13_120.6	hydroxylase	884	629	0.545611
KDM5D_e13_79.1	hydroxylase	2236	2863	0.584805		KDM5D_e13_79.1	hydroxylase	3209	2199	0.566783
KDM5D_e14_163.1	hydroxylase	2097	2711	0.579193		KDM5D_e14_163.1	hydroxylase	3077	1822	0.655897
KDM5D_e14_163.18	hydroxylase	1383	1461	0.708637		KDM5D_e14_163.18	hydroxylase	2033	1654	0.477364
KDM5D_e14_163.8	hydroxylase	528	998	0.395961		KDM5D_e14_163.8	hydroxylase	903	534	0.656417
KDM5D_e15_118.1	hydroxylase	908	1158	0.586909		KDM5D_e15_118.1	hydroxylase	1422	974	0.566914
KDM5D_e15_118.5	hydroxylase	395	1256	0.235409		KDM5D_e15_118.5	hydroxylase	549	466	0.457271
KDM5D_e15_118.7	hydroxylase	1145	1434	0.597728		KDM5D_e15_118.7	hydroxylase	1793	908	0.766758
KDM6A_e25_115.7	hydroxylase	1761	1810	0.728409		KDM6A_e25_115.7	hydroxylase	2631	1170	0.873253
KDM6A_e25_115.8	hydroxylase	1902	1955	0.728403		KDM6A_e25_115.8	hydroxylase	2530	1415	0.694375
KDM6A_e26_188.12	hydroxylase	2826	3050	0.693809		KDM6A_e26_188.12	hydroxylase	4137	2012	0.798589
KDM6A_e26_188.17	hydroxylase	1231	1169	0.788206		KDM6A_e26_188.17	hydroxylase	1736	701	0.96148
KDM6B_e18_115.4	hydroxylase	1007	761	0.990129		KDM6B_e18_115.4	hydroxylase	1710	599	1.10825
KDM6B_e18_115.6	hydroxylase	1768	856	1.54562		KDM6B_e18_115.6	hydroxylase	2456	635	1.50155
KDM6B_e18_115.7	hydroxylase	1275	484	1.97001		KDM6B_e18_115.7	hydroxylase	1827	388	1.82735
KDM6B_e19_188.0	hydroxylase	1748	1646	0.795039		KDM6B_e19_188.0	hydroxylase	2549	997	0.992784
KDM6B_e19_188.26	hydroxylase	700	558	0.93833		KDM6B_e19_188.26	hydroxylase	1159	315	1.42754
KDM6B_e19_188.5	hydroxylase	873	576	1.13371		KDM6B_e19_188.5	hydroxylase	1124	422	1.03372
KDM7A_e6_187.15	hydroxylase	1729	2758	0.469415		KDM7A_e6_187.15	hydroxylase	2547	1869	0.529272
KDM7A_e6_187.17	hydroxylase	1666	2545	0.490155		KDM7A_e6_187.17	hydroxylase	2531	1651	0.595377
KDM7A_e6_187.7	hydroxylase	2036	880	1.73141		KDM7A_e6_187.7	hydroxylase	2941	856	1.33405
KDM7A_e6_187.8	hydroxylase	581	571	0.761106		KDM7A_e6_187.8	hydroxylase	887	384	0.896402
KDM7A_e6_187.9	hydroxylase	2290	1466	1.16938		KDM7A_e6_187.9	hydroxylase	3299	1106	1.15831
KDM8_e4_133.0	hydroxylase	597	168	2.64977		KDM8_e4_133.0	hydroxylase	845	240	1.3655
KDM8_e4_133.7	hydroxylase	2077	2385	0.652058		KDM8_e4_133.7	hydroxylase	2997	1396	0.833739
KDM8_e4_133.8	hydroxylase	1158	508	1.70482		KDM8_e4_133.8	hydroxylase	1879	494	1.47641
KDM8_e5_45.0	hydroxylase	1008	1352	0.558107		KDM8_e5_45.0	hydroxylase	1674	1133	0.573754
KDM8_e5_45.1	hydroxylase	2082	843	1.84817		KDM8_e5_45.1	hydroxylase	3169	873	1.4095
KDM8_e6_150.10	hydroxylase	1783	1702	0.784287		KDM8_e6_150.10	hydroxylase	2541	991	0.995658
KDM8_e6_150.12	hydroxylase	2170	1907	0.851948		KDM8_e6_150.12	hydroxylase	3206	1275	0.976496
KDM8_e6_150.27	hydroxylase	1229	1156	0.795769		KDM8_e6_150.27	hydroxylase	1808	859	0.817256
KDM8_e7_159.0	hydroxylase	1162	648	1.34154		KDM8_e7_159.0	hydroxylase	1632	450	1.40761
KDM8_e7_159.11	hydroxylase	578	180	2.39511		KDM8_e7_159.11	hydroxylase	817	181	1.74969
KDM8_e7_159.7	hydroxylase	421	251	1.25253		KDM8_e7_159.7	hydroxylase	752	301	0.969261
KMT2A_BD_e16_174.15	BD	1889	1226	1.15332		KMT2A_BD_e16_174.15	BD	2771	1035	1.03964
KMT2A_BD_e16_174.16	BD	3949	2121	1.39402		KMT2A_BD_e16_174.16	BD	6099	1614	1.46757
KMT2A_BD_e16_174.22	BD	1079	656	1.23054		KMT2A_BD_e16_174.22	BD	1474	560	1.02178
KMT2A_BD_e17_111.1	BD	1483	790	1.40468		KMT2A_BD_e17_111.1	BD	2112	651	1.25951
KMT2A_BD_e17_111.4	BD	981	573	1.28062		KMT2A_BD_e17_111.4	BD	1491	455	1.27188
KMT2A_BD_e17_111.6	BD	2726	2394	0.85259		KMT2A_BD_e17_111.6	BD	4167	1608	1.00643
KMT2A_BD_e18_50.1	BD	444	521	0.637376		KMT2A_BD_e18_50.1	BD	805	350	0.892474
KMT2A_BD_e18_50.2	BD	2236	1678	0.997609		KMT2A_BD_e18_50.2	BD	3145	1368	0.892813
KMT2A_BD_e18_50.3	BD	1494	1016	1.10055		KMT2A_BD_e18_50.3	BD	2281	1016	0.871796
KMT2B_e36_130.0	SET	1409	615	1.71388		KMT2B_e36_130.0	SET	2195	442	1.92744
KMT2B_e36_130.2	SET	1241	256	3.62024		KMT2B_e36_130.2	SET	1941	225	3.34536
KMT2B_e36_130.3	SET	1215	227	3.99571		KMT2B_e36_130.3	SET	1906	182	4.05952
KMT2B_e37_218.0	SET	1119	549	1.52454		KMT2B_e37_218.0	SET	1791	408	1.70362
KMT2B_e37_218.11	SET	1414	68	15.4049		KMT2B_e37_218.11	SET	2264	123	7.12773
KMT2B_e37_218.25	SET	984	159	4.61351		KMT2B_e37_218.25	SET	1622	167	3.76422
KMT2C_e58_117.3	SET	610	364	1.25259		KMT2C_e58_117.3	SET	901	187	1.8678
KMT2C_e58_117.5	SET	2140	1024	1.56412		KMT2C_e58_117.5	SET	3402	680	1.94235
KMT2C_e58_117.6	SET	664	324	1.53142		KMT2C_e58_117.6	SET	1202	281	1.65939
KMT2C_e59_74.1	SET	1364	1417	0.720592		KMT2C_e59_74.1	SET	2206	1434	0.597431
KMT2C_e59_74.2	SET	856	348	1.83838		KMT2C_e59_74.2	SET	1142	231	1.91723
KMT2C_e59_74.3	SET	725	304	1.78185		KMT2C_e59_74.3	SET	1147	238	1.86908
KMT2C_e60_109.0	SET	2296	1362	1.26192		KMT2C_e60_109.0	SET	3223	823	1.52056
KMT2C_e60_109.5	SET	224	79	2.10377		KMT2C_e60_109.5	SET	249	49	1.9585
KMT2C_e60_109.7	SET	724	934	0.58012		KMT2C_e60_109.7	SET	1381	813	0.659546
KMT2D_e50_153.15	SET	430	51	6.22359		KMT2D_e50_153.15	SET	715	84	3.29134
KMT2D_e50_153.16	SET	1354	242	4.17768		KMT2D_e50_153.16	SET	2128	245	3.36874
KMT2D_e50_153.9	SET	989	237	3.11567		KMT2D_e50_153.9	SET	1868	382	1.89767
KMT2D_e51_74.0	SET	1119	995	0.841695		KMT2D_e51_74.0	SET	1793	908	0.766758
KMT2D_e51_74.1	SET	1291	176	5.47071		KMT2D_e51_74.1	SET	2016	277	2.82326
KMT2D_e52_109.3	SET	938	108	6.46029		KMT2D_e52_109.3	SET	1506	124	4.70321
KMT2D_e52_109.6	SET	357	168	1.58453		KMT2D_e52_109.6	SET	654	209	1.21332
KMT2D_e52_109.8	SET	2762	652	3.16922		KMT2D_e52_109.8	SET	3801	623	2.36858
MINA_e2_254.19	hydroxylase	954	1244	0.574038		MINA_e2_254.19	hydroxylase	1456	705	0.80183
MINA_e3_120.4	hydroxylase	1418	981	1.08181		MINA_e3_120.4	hydroxylase	2193	756	1.12627
MINA_e4_129.12	hydroxylase	917	926	0.741108		MINA_e4_129.12	hydroxylase	1463	903	0.629099
MINA_e5_104.4	hydroxylase	1373	1344	0.764722		MINA_e5_104.4	hydroxylase	2152	897	0.931561
MINA_e6_103.8	hydroxylase	1256	783	1.20029		MINA_e6_103.8	hydroxylase	1972	751	1.01951
MINA_e7_172.5	hydroxylase	1035	1085	0.713979		MINA_e7_172.5	hydroxylase	1586	736	0.836653
MLL1_e35_130.12	SET	1313	623	1.57663		MLL1_e35_130.12	SET	2035	552	1.4311
MLL1_e35_130.6	SET	2832	3913	0.541969		MLL1_e35_130.6	SET	4313	2757	0.607618
MLL1_e35_130.8	SET	1011	557	1.35765		MLL1_e35_130.8	SET	1429	450	1.23252
MLL1_e36_237.14	SET	336	75	3.32228		MLL1_e36_237.14	SET	423	89	1.83827
MLL1_e36_237.6	SET	434	393	0.825552		MLL1_e36_237.6	SET	854	243	1.36304
MLL1_e36_237.8	SET	435	372	0.874072		MLL1_e36_237.8	SET	709	241	1.14098
MLL5_e11_105.0	SET	2107	1337	1.17968		MLL5_e11_105.0	SET	3422	1174	1.13192
MLL5_e11_105.4	SET	705	517	1.01987		MLL5_e11_105.4	SET	969	386	0.974202
MLL5_e11_105.5	SET	1159	761	1.13958		MLL5_e11_105.5	SET	2074	625	1.28827
MLL5_e12_118.4	SET	2152	2031	0.793317		MLL5_e12_118.4	SET	3116	1392	0.869333
MLL5_e12_118.6	SET	977	282	2.58802		MLL5_e12_118.6	SET	1542	389	1.53833
MLL5_e12_118.7	SET	702	307	1.7085		MLL5_e12_118.7	SET	1114	365	1.18435
MLL5_e13_110.1	SET	1682	980	1.28452		MLL5_e13_110.1	SET	2717	842	1.25293
MLL5_e13_110.2	SET	1513	1260	0.898845		MLL5_e13_110.2	SET	2292	1048	0.849262
MLL5_e13_110.3	SET	2042	2643	0.578509		MLL5_e13_110.3	SET	2650	1736	0.592855
MOF_e10_135.9	AT	947	907	0.781373		MOF_e10_135.9	AT	1251	534	0.909389
MOF_e5_164.14	AT	2251	884	1.90559		MOF_e5_164.14	AT	3237	800	1.57105
MOF_e6_90.7	AT	2396	292	6.13008		MOF_e6_90.7	AT	3260	254	4.97817
MOF_e7_141.6	AT	545	793	0.514266		MOF_e7_141.6	AT	829	489	0.658037
MOF_e8_94.3	AT	1105	334	2.47239		MOF_e8_94.3	AT	1881	404	1.80692
MOF_e9_151.11	AT	613	310	1.47749		MOF_e9_151.11	AT	697	196	1.37869
MORF_e12_162.0	AT	666	588	0.847263		MORF_e12_162.0	AT	874	437	0.776235
MORF_e12_162.8	AT	2014	3133	0.48136		MORF_e12_162.8	AT	3093	2041	0.588577
MORF_e12_162.9	AT	459	686	0.500598		MORF_e12_162.9	AT	813	510	0.618784
MORF_e13_94.8	AT	1131	566	1.49467		MORF_e13_94.8	AT	2097	617	1.31944
MORF_e14_210.22	AT	853	607	1.05123		MORF_e14_210.22	AT	1211	443	1.06098
MORF_e14_210.3	AT	1529	969	1.18093		MORF_e14_210.3	AT	2380	624	1.48071
MOZ_e12_162.1	AT	615	281	1.63488		MOZ_e12_162.1	AT	951	225	1.63907
MOZ_e12_162.7	AT	1776	1355	0.981156		MOZ_e12_162.7	AT	2873	1000	1.11562
MOZ_e12_162.8	AT	2016	1068	1.41283		MOZ_e12_162.8	AT	3048	934	1.26718
MOZ_e13_94.4	AT	620	313	1.48008		MOZ_e13_94.4	AT	1023	152	2.60779
MOZ_e13_94.5	AT	2058	779	1.97681		MOZ_e13_94.5	AT	2930	572	1.9885
MOZ_e14_210.0	AT	511	907	0.421628		MOZ_e14_210.0	AT	921	694	0.515236
MOZ_e14_210.3	AT	1235	603	1.53209		MOZ_e14_210.3	AT	1589	588	1.04908
NAT10_e18_75.1	AT	594	571	0.778136		NAT10_e18_75.1	AT	754	464	0.630724
NAT10_e18_75.4	AT	2218	1071	1.55004		NAT10_e18_75.4	AT	3057	950	1.24952
NAT10_e18_75.5	AT	4500	791	4.25696		NAT10_e18_75.5	AT	7157	538	5.16398
NAT10_e18_75.6	AT	2081	290	5.36078		NAT10_e18_75.6	AT	3118	220	5.49587
NAT10_e18_75.7	AT	1136	198	4.28103		NAT10_e18_75.7	AT	1599	166	3.73314
NCOA1_e17_403.2	AT	626	573	0.817197		NCOA1_e17_403.2	AT	1053	455	0.898247
NCOA1_e17_403.26	AT	766	687	0.834206		NCOA1_e17_403.26	AT	1036	501	0.802666
NCOA1_e17_403.31	AT	436	657	0.496479		NCOA1_e17_403.31	AT	660	505	0.507304
NCOA1_e18_175.12	AT	1041	665	1.17116		NCOA1_e18_175.12	AT	1438	307	1.81728
NCOA1_e18_175.13	AT	541	255	1.58437		NCOA1_e18_175.13	AT	687	251	1.0616
NCOA1_e18_175.22	AT	1831	1222	1.12157		NCOA1_e18_175.22	AT	2478	904	1.06438
NCOA2_e19_235.10	AT	1417	1026	1.03367		NCOA2_e19_235.10	AT	2109	846	0.967957
NCOA2_e19_235.14	AT	828	524	1.18182		NCOA2_e19_235.14	AT	1261	444	1.1023
NCOA2_e19_235.16	AT	1333	699	1.4268		NCOA2_e19_235.16	AT	1801	552	1.26654
NCOA2_e20_178.17	AT	2131	1691	0.943457		NCOA2_e20_178.17	AT	2890	1792	0.626347
NCOA2_e20_178.18	AT	2166	2700	0.600688		NCOA2_e20_178.18	AT	3131	1893	0.642381
NCOA2_e20_178.20	AT	1072	644	1.24531		NCOA2_e20_178.20	AT	1314	399	1.27805
neg01	neg_control	706	935	0.565093		neg01	neg_control	1266	849	0.578998
neg02	neg_control	841	1091	0.576962		neg02	neg_control	1351	834	0.628979
neg03	neg_control	3506	4348	0.60384		neg03	neg_control	5175	3757	0.535024
neg04	neg_control	839	1431	0.438904		neg04	neg_control	1205	862	0.542792
neg05	neg_control	263	318	0.61799		neg05	neg_control	483	255	0.734675
neg06	neg_control	2827	4292	0.493247		neg06	neg_control	4563	2774	0.6389
neg07	neg_control	1527	2216	0.515937		neg07	neg_control	2111	1389	0.59022
neg08	neg_control	1626	2567	0.474288		neg08	neg_control	2397	1740	0.535021
neg09	neg_control	717	1117	0.480451		neg09	neg_control	985	913	0.418919
neg10	neg_control	1458	1585	0.688648		neg10	neg_control	1915	1129	0.65868
neg11	neg_control	1385	1571	0.659995		neg11	neg_control	1688	1160	0.565091
neg12	neg_control	817	1025	0.596562		neg12	neg_control	1380	856	0.625976
neg13	neg_control	1472	2165	0.509066		neg13	neg_control	2552	1557	0.636551
neg14	neg_control	57	138	0.307694		neg14	neg_control	47	42	0.430724
neg15	neg_control	668	1160	0.431035		neg15	neg_control	1200	727	0.640862
neg16	neg_control	1306	1979	0.494092		neg16	neg_control	2045	1593	0.498564
neg17	neg_control	870	1007	0.646608		neg17	neg_control	1225	833	0.571002
neg18	neg_control	2209	2951	0.560519		neg18	neg_control	3473	2205	0.611743
neg19	neg_control	665	846	0.588222		neg19	neg_control	1019	755	0.524026
neg20	neg_control	1590	2050	0.58071		neg20	neg_control	2650	1716	0.599763
neg21	neg_control	776	1242	0.467684		neg21	neg_control	1080	840	0.499221
neg22	neg_control	819	1498	0.409288		neg22	neg_control	1437	862	0.647296
neg23	neg_control	1491	1748	0.638594		neg23	neg_control	2190	1398	0.608367
neg24	neg_control	359	563	0.476961		neg24	neg_control	633	478	0.514011
neg25	neg_control	775	768	0.755078		neg25	neg_control	1103	607	0.705437
neg26	neg_control	1970	2965	0.497515		neg26	neg_control	3198	2070	0.600034
neg27	neg_control	1383	1875	0.552232		neg27	neg_control	2077	1586	0.5086
neg28	neg_control	312	657	0.355278		neg28	neg_control	494	301	0.636722
neg29	neg_control	1736	2082	0.624291		neg29	neg_control	2437	1771	0.53443
neg30	neg_control	1773	2184	0.607829		neg30	neg_control	2690	1690	0.61818
neg31	neg_control	771	1628	0.354548		neg31	neg_control	1288	957	0.522609
neg32	neg_control	2919	3662	0.5969		neg32	neg_control	4097	2680	0.593769
neg33	neg_control	831	955	0.651226		neg33	neg_control	1252	692	0.702431
neg34	neg_control	1792	3062	0.438229		neg34	neg_control	2898	2016	0.558308
neg35	neg_control	824	1112	0.554631		neg35	neg_control	1187	727	0.633919
neg36	neg_control	915	1088	0.629459		neg36	neg_control	1236	923	0.519976
neg37	neg_control	712	1015	0.52501		neg37	neg_control	1007	1011	0.386777
neg38	neg_control	594	825	0.538782		neg38	neg_control	1061	671	0.61389
neg39	neg_control	673	1171	0.430185		neg39	neg_control	996	569	0.679517
neg40	neg_control	1907	2394	0.596438		neg40	neg_control	2716	2232	0.472617
neg41	neg_control	711	1026	0.518656		neg41	neg_control	848	723	0.45538
neg42	neg_control	487	882	0.413206		neg42	neg_control	703	499	0.546847
neg43	neg_control	451	718	0.469974		neg43	neg_control	713	564	0.490751
neg44	neg_control	497	824	0.451345		neg44	neg_control	603	491	0.476696
neg45	neg_control	1303	1855	0.525896		neg45	neg_control	1813	1307	0.538694
neg46	neg_control	1067	1634	0.488864		neg46	neg_control	1580	1095	0.560323
neg47	neg_control	857	1073	0.597795		neg47	neg_control	1400	908	0.598695
neg48	neg_control	1178	1195	0.73787		neg48	neg_control	1574	797	0.766804
neg49	neg_control	942	1342	0.525449		neg49	neg_control	1140	913	0.48484
neg50	neg_control	589	600	0.734339		neg50	neg_control	900	590	0.59218
NO66_e1_980.106	hydroxylase	465	185	1.875		NO66_e1_980.106	hydroxylase	647	205	1.22371
NO66_e1_980.131	hydroxylase	2829	1949	1.08675		NO66_e1_980.131	hydroxylase	3888	1352	1.1168
NO66_e1_980.160	hydroxylase	986	558	1.32171		NO66_e1_980.160	hydroxylase	1602	585	1.06308
NO66_e1_980.162	hydroxylase	639	656	0.728745		NO66_e1_980.162	hydroxylase	965	228	1.64136
NO66_e1_980.7	hydroxylase	1570	1430	0.821884		NO66_e1_980.7	hydroxylase	2022	1285	0.611077
NSD1_e19_117.0	SET	1360	1350	0.754117		NSD1_e19_117.0	SET	1917	884	0.842032
NSD1_e20_142.13	SET	1316	527	1.86768		NSD1_e20_142.13	SET	1815	536	1.31446
NSD1_e20_142.4	SET	627	394	1.18965		NSD1_e20_142.4	SET	789	303	1.01025
NSD1_e20_142.7	SET	1448	855	1.26735		NSD1_e20_142.7	SET	1761	507	1.34824
NSD1_e21_41.0	SET	1538	1004	1.1465		NSD1_e21_41.0	SET	2207	912	0.939663
NSD1_e21_41.1	SET	662	800	0.619207		NSD1_e21_41.1	SET	1127	627	0.697809
NSD2_e19_73.7	SET	3543	1037	2.55713		NSD2_e19_73.7	SET	5120	1083	1.83584
NSD2_e19_73.8	SET	1914	434	3.29745		NSD2_e19_73.8	SET	2753	477	2.24018
NSD2_e20_117.0	SET	602	564	0.798391		NSD2_e20_117.0	SET	1015	338	1.1652
NSD2_e20_117.3	SET	1744	785	1.66241		NSD2_e20_117.3	SET	2603	516	1.95815
NSD2_e21_142.16	SET	1874	419	3.34391		NSD2_e21_142.16	SET	2786	557	1.94166
NSD2_e21_142.6	SET	597	174	2.55879		NSD2_e21_142.6	SET	869	177	1.90302
NSD3_e20_117.1	SET	717	910	0.589651		NSD3_e20_117.1	SET	1449	722	0.779196
NSD3_e20_117.2	SET	1212	479	1.89218		NSD3_e20_117.2	SET	1584	399	1.54067
NSD3_e21_142.0	SET	1494	880	1.27049		NSD3_e21_142.0	SET	2021	577	1.35971
NSD3_e21_142.11	SET	1881	831	1.69383		NSD3_e21_142.11	SET	2593	591	1.70325
NSD3_e21_142.4	SET	583	83	5.21391		NSD3_e21_142.4	SET	851	45	7.28339
PADI4_e10_108.0	hydroxylase	1863	1762	0.791584		PADI4_e10_108.0	hydroxylase	2695	1358	0.770698
PADI4_e11_155.15	hydroxylase	1284	1222	0.786506		PADI4_e11_155.15	hydroxylase	1874	1040	0.699719
PADI4_e12_145.10	hydroxylase	1669	1616	0.773193		PADI4_e12_145.10	hydroxylase	2405	1297	0.720103
PADI4_e13_103.11	hydroxylase	1518	1617	0.702805		PADI4_e13_103.11	hydroxylase	2068	1184	0.678275
PADI4_e14_70.0	hydroxylase	2015	2381	0.633656		PADI4_e14_70.0	hydroxylase	2708	1796	0.585596
PADI4_e15_129.1	hydroxylase	427	473	0.675078		PADI4_e15_129.1	hydroxylase	690	244	1.09678
PADI4_e8_104.8	hydroxylase	936	569	1.23046		PADI4_e8_104.8	hydroxylase	1355	474	1.10957
PADI4_e9_112.0	hydroxylase	1132	987	0.858369		PADI4_e9_112.0	hydroxylase	2199	606	1.40872
PBRM1_BD1_e3_98.0	BD1	1795	929	1.44602		PBRM1_BD1_e3_98.0	BD1	2604	865	1.16891
PBRM1_BD1_e3_98.1	BD1	781	366	1.59498		PBRM1_BD1_e3_98.1	BD1	1092	170	2.48961
PBRM1_BD1_e3_98.6	BD1	1546	1016	1.13886		PBRM1_BD1_e3_98.6	BD1	2245	706	1.23459
PBRM1_BD1_e4_148.0	BD1	1579	1143	1.03401		PBRM1_BD1_e4_148.0	BD1	2130	664	1.24539
PBRM1_BD1_e4_148.5	BD1	2548	3099	0.615669		PBRM1_BD1_e4_148.5	BD1	3545	2288	0.601777
PBRM1_BD1_e4_148.6	BD1	966	802	0.901305		PBRM1_BD1_e4_148.6	BD1	1629	518	1.22072
PBRM1_BD1_e5_86.0	BD1	375	484	0.579414		PBRM1_BD1_e5_86.0	BD1	517	277	0.724022
PBRM1_BD1_e5_86.3	BD1	1025	1355	0.566264		PBRM1_BD1_e5_86.3	BD1	1386	887	0.606735
PBRM1_BD1_e5_86.5	BD1	900	865	0.778619		PBRM1_BD1_e5_86.5	BD1	1348	479	1.09232
PBRM1_BD2_e6_117.1	BD2	1215	880	1.03323		PBRM1_BD2_e6_117.1	BD2	1879	735	0.992566
PBRM1_BD2_e6_117.2	BD2	1685	1542	0.818048		PBRM1_BD2_e6_117.2	BD2	2376	1015	0.908999
PBRM1_BD2_e6_117.5	BD2	960	866	0.829569		PBRM1_BD2_e6_117.5	BD2	1546	684	0.877518
PBRM1_BD2_e7_69.1	BD2	2643	1992	0.993388		PBRM1_BD2_e7_69.1	BD2	3610	1062	1.32
PBRM1_BD2_e7_69.2	BD2	1057	587	1.34697		PBRM1_BD2_e7_69.2	BD2	1796	393	1.77351
PBRM1_BD2_e8_99.1	BD2	524	909	0.431404		PBRM1_BD2_e8_99.1	BD2	735	508	0.561618
PBRM1_BD2_e8_99.2	BD2	2349	2100	0.837497		PBRM1_BD2_e8_99.2	BD2	3543	1613	0.853064
PBRM1_BD2_e8_99.4	BD2	2679	1580	1.26936		PBRM1_BD2_e8_99.4	BD2	3757	1320	1.10532
PBRM1_BD3_e12_158.2	BD3	1228	595	1.54387		PBRM1_BD3_e12_158.2	BD3	1948	670	1.12879
PBRM1_BD3_e12_158.3	BD3	1127	917	0.91976		PBRM1_BD3_e12_158.3	BD3	1874	489	1.48753
PBRM1_BD3_e13_140.1	BD3	477	503	0.709216		PBRM1_BD3_e13_140.1	BD3	604	463	0.506339
PBRM1_BD3_e13_140.2	BD3	1911	1428	1.0018		PBRM1_BD3_e13_140.2	BD3	2942	986	1.15863
PBRM1_BD3_e13_140.4	BD3	575	439	0.979349		PBRM1_BD3_e13_140.4	BD3	888	220	1.56521
PBRM1_BD4_e15_277.0	BD4	317	538	0.440704		PBRM1_BD4_e15_277.0	BD4	547	331	0.641209
PBRM1_BD4_e15_277.10	BD4	660	719	0.686811		PBRM1_BD4_e15_277.10	BD4	1099	502	0.849782
PBRM1_BD4_e15_277.14	BD4	1369	1419	0.722215		PBRM1_BD4_e15_277.14	BD4	1897	907	0.812126
PBRM1_BD5_e17_310.11	BD5	1399	599	1.74712		PBRM1_BD5_e17_310.11	BD5	2100	381	2.13895
PBRM1_BD5_e17_310.16	BD5	1299	598	1.62495		PBRM1_BD5_e17_310.16	BD5	1571	516	1.18181
PBRM1_BD5_e17_310.9	BD5	1044	441	1.77011		PBRM1_BD5_e17_310.9	BD5	1602	386	1.6106
PBRM1_BD6_e17_246.5	BD6	1353	514	1.96869		PBRM1_BD6_e17_246.5	BD6	1901	466	1.58337
PBRM1_BD6_e17_246.7	BD6	769	765	0.752167		PBRM1_BD6_e17_246.7	BD6	1110	468	0.92059
PBRM1_BD6_e17_246.8	BD6	348	78	3.30985		PBRM1_BD6_e17_246.8	BD6	578	144	1.55505
PCAF_e11_118.0	AT	688	970	0.530831		PCAF_e11_118.0	AT	1002	688	0.565436
PCAF_e11_118.1	AT	2106	2303	0.684696		PCAF_e11_118.1	AT	2862	1505	0.738534
PCAF_e11_118.7	AT	3271	2780	0.881035		PCAF_e11_118.7	AT	4479	2056	0.846107
PCAF_e11_118.9	AT	1317	1265	0.779314		PCAF_e11_118.9	AT	1959	1270	0.599028
PCAF_e12_59.0	AT	987	876	0.843172		PCAF_e12_59.0	AT	1263	833	0.588715
PCNA_e2.1	positive _control	2223	353	4.70672		PCNA_e2.1	positive _control	3078	3526	0.339069
PCNA_e2.2	positive _control	886	0	886		PCNA_e2.2	positive _control	1221	36	13.0347
PCNA_e3.1	positive _control	2894	3606	0.600976		PCNA_e3.1	positive _control	4760	3066	0.603016
PCNA_e3.2	positive _control	1123	960	0.875476		PCNA_e3.2	positive _control	1556	2754	0.219449
PHF2_e6_79.6	hydroxylase	674	435	1.1585		PHF2_e6_79.6	hydroxylase	931	210	1.719
PHF2_e7_163.12	hydroxylase	842	159	3.94774		PHF2_e7_163.12	hydroxylase	1208	187	2.50423
PHF2_e7_163.13	hydroxylase	1131	587	1.44127		PHF2_e7_163.13	hydroxylase	1557	281	2.14947
PHF2_e7_163.9	hydroxylase	1111	894	0.930009		PHF2_e7_163.9	hydroxylase	1854	548	1.31332
PHF2_e8_50.1	hydroxylase	1134	1697	0.500281		PHF2_e8_50.1	hydroxylase	1971	1202	0.636783
PHF2_e8_50.3	hydroxylase	1974	692	2.13425		PHF2_e8_50.3	hydroxylase	2731	647	1.63873
PHF8_e7_187.10	hydroxylase	2758	997	2.07037		PHF8_e7_187.10	hydroxylase	4347	749	2.25337
PHF8_e7_187.12	hydroxylase	1245	1721	0.541594		PHF8_e7_187.12	hydroxylase	1798	1347	0.518378
PHF8_e7_187.13	hydroxylase	2184	1079	1.51497		PHF8_e7_187.13	hydroxylase	3240	697	1.80476
PHF8_e7_187.2	hydroxylase	294	321	0.684391		PHF8_e7_187.2	hydroxylase	608	136	1.73171
PHF8_e7_187.8	hydroxylase	2308	1285	1.34448		PHF8_e7_187.8	hydroxylase	3537	997	1.37759
PhIP_BD1_e30_86.1	BD1	746	319	1.74745		PhIP_BD1_e30_86.1	BD1	1088	164	2.57103
PhIP_BD1_e30_86.7	BD1	2561	1269	1.51066		PhIP_BD1_e30_86.7	BD1	3792	1191	1.23642
PhIP_BD1_e31_121.0	BD1	1345	1483	0.678948		PhIP_BD1_e31_121.0	BD1	2268	1133	0.777345
PhIP_BD1_e31_121.12	BD1	1829	673	2.03325		PhIP_BD1_e31_121.12	BD1	2841	679	1.62444
PhIP_BD1_e31_121.5	BD1	2006	1963	0.765102		PhIP_BD1_e31_121.5	BD1	2867	1476	0.754356
PhIP_BD1_e32_126.0	BD1	496	292	1.269		PhIP_BD1_e32_126.0	BD1	904	215	1.6304
PhIP_BD1_e32_126.4	BD1	1051	707	1.11224		PhIP_BD1_e32_126.4	BD1	1438	610	0.91517
PhIP_BD1_e32_126.5	BD1	2678	1143	1.7537		PhIP_BD1_e32_126.5	BD1	3808	935	1.58145
PhIP_BD2_e35_80.0	BD2	1243	660	1.40899		PhIP_BD2_e35_80.0	BD2	2114	713	1.15114
PhIP_BD2_e35_80.2	BD2	1286	677	1.42117		PhIP_BD2_e35_80.2	BD2	2033	532	1.4834
PhIP_BD2_e35_80.3	BD2	838	398	1.57405		PhIP_BD2_e35_80.3	BD2	1252	326	1.49011
PhIP_BD2_e36_153.0	BD2	2238	1234	1.35755		PhIP_BD2_e36_153.0	BD2	2953	917	1.25043
PhIP_BD2_e36_153.1	BD2	1230	742	1.24033		PhIP_BD2_e36_153.1	BD2	1468	457	1.24678
PhIP_BD2_e36_153.9	BD2	1820	733	1.8578		PhIP_BD2_e36_153.9	BD2	2614	538	1.88608
PhIP_BD2_e37_80.0	BD2	644	444	1.08454		PhIP_BD2_e37_80.0	BD2	942	315	1.16026
POLR2A_e10.1	positive _control	814	23	25.6716		POLR2A_e10.1	positive _control	1322	17	29.5338
POLR2A_e10.2	positive _control	1141	830	1.0287		POLR2A_e10.2	positive _control	1578	616	0.994493
POLR2A_e2.1	positive _control	465	21	16.0136		POLR2A_e2.1	positive _control	621	19	12.4422
POLR2A_e2.2	positive _control	733	951	0.576841		POLR2A_e2.2	positive _control	1250	698	0.695284
POLR2A_e27.1	positive _control	1647	547	2.25209		POLR2A_e27.1	positive _control	2077	416	1.9377
POLR2A_e27.2	positive _control	1243	1329	0.700125		POLR2A_e27.2	positive _control	1831	875	0.812525
POLR2A_e28.1	positive _control	755	201	2.80292		POLR2A_e28.1	positive _control	1260	76	6.40755
POLR2A_e28.2	positive _control	963	310	2.32108		POLR2A_e28.2	positive _control	1194	140	3.30386
POLR2D_e2.1	positive _control	1211	121	7.44995		POLR2D_e2.1	positive _control	1646	84	7.57698
POLR2D_e3.1	positive _control	451	151	2.226		POLR2D_e3.1	positive _control	699	102	2.65201
PRDM2_e3_47.0	SET	697	813	0.64153		PRDM2_e3_47.0	SET	994	683	0.565026
PRDM2_e3_47.1	SET	562	567	0.741403		PRDM2_e3_47.1	SET	913	416	0.851768
PRDM2_e4_104.3	SET	1663	1816	0.685601		PRDM2_e4_104.3	SET	2524	1729	0.566952
PRDM2_e5_153.4	SET	1294	1339	0.723411		PRDM2_e5_153.4	SET	2149	1164	0.716948
PRDM2_e5_153.5	SET	1533	1869	0.614092		PRDM2_e5_153.5	SET	2552	1250	0.792839
PRDM2_e6_63.3	SET	2112	1372	1.15233		PRDM2_e6_63.3	SET	3027	1349	0.871415
PRDM2_e6_63.7	SET	539	400	1.00737		PRDM2_e6_63.7	SET	892	443	0.781502
PRDM8_e8_135.1	SET	2244	2414	0.696026		PRDM8_e8_135.1	SET	3584	1962	0.709467
PRDM8_e8_135.11	SET	770	929	0.620297		PRDM8_e8_135.11	SET	1131	676	0.649555
PRDM8_e8_135.12	SET	1686	2002	0.63053		PRDM8_e8_135.12	SET	2198	1319	0.647149
PRDM8_e9_190.13	SET	2142	2479	0.646973		PRDM8_e9_190.13	SET	3144	1683	0.725517
PRDM8_e9_190.8	SET	2422	2459	0.737493		PRDM8_e9_190.8	SET	3574	1709	0.8122
PRDM8_e9_190.9	SET	546	792	0.515859		PRDM8_e9_190.9	SET	1092	533	0.795295
PRDM9_e10_135.11	SET	397	400	0.74198		PRDM9_e10_135.11	SET	660	218	1.17399
PRDM9_e8_158.10	SET	2527	2733	0.692343		PRDM9_e8_158.10	SET	3881	1599	0.942625
PRDM9_e8_158.18	SET	2095	2393	0.655511		PRDM9_e8_158.18	SET	3436	1238	1.07782
PRDM9_e8_158.7	SET	1819	1845	0.738133		PRDM9_e8_158.7	SET	2644	1355	0.757787
PRDM9_e9_68.4	SET	1177	1457	0.604739		PRDM9_e9_68.4	SET	1509	996	0.588315
PRMT1_e4_73.0	RMT	1610	86	13.9007		PRMT1_e4_73.0	RMT	2643	179	5.72337
PRMT1_e4_73.6	RMT	1597	175	6.80591		PRMT1_e4_73.6	RMT	1910	189	3.91768
PRMT1_e4_73.7	RMT	1084	1830	0.443481		PRMT1_e4_73.7	RMT	1759	1077	0.634224
PRMT1_e6_143.13	RMT	1213	172	5.2592		PRMT1_e6_143.13	RMT	2298	139	6.40431
PRMT1_e6_143.14	RMT	918	39	17.2978		PRMT1_e6_143.14	RMT	1480	70	8.16788
PRMT2_e6_162.10	RMT	1284	744	1.29131		PRMT2_e6_162.10	RMT	1650	515	1.24365
PRMT2_e6_162.11	RMT	1735	635	2.04403		PRMT2_e6_162.11	RMT	2804	883	1.23304
PRMT2_e6_162.8	RMT	1456	714	1.52575		PRMT2_e6_162.8	RMT	2228	518	1.66959
PRMT2_e7_165.10	RMT	990	441	1.67855		PRMT2_e7_165.10	RMT	1204	318	1.46899
PRMT2_e7_165.12	RMT	649	257	1.88592		PRMT2_e7_165.12	RMT	906	222	1.58258
PRMT2_e7_165.21	RMT	946	941	0.752368		PRMT2_e7_165.21	RMT	1325	513	1.00258
PRMT3_e10_100.0	RMT	1060	1652	0.480367		PRMT3_e10_100.0	RMT	1709	955	0.694883
PRMT3_e10_100.1	RMT	995	1213	0.614		PRMT3_e10_100.1	RMT	1423	925	0.597352
PRMT3_e10_100.2	RMT	2034	3337	0.456427		PRMT3_e10_100.2	RMT	3034	1956	0.602435
PRMT3_e9_122.3	RMT	1017	839	0.907081		PRMT3_e9_122.3	RMT	1355	744	0.707113
PRMT3_e9_122.5	RMT	632	1066	0.443741		PRMT3_e9_122.5	RMT	815	661	0.478686
PRMT3_e9_122.6	RMT	966	792	0.912674		PRMT3_e9_122.6	RMT	1684	645	1.01361
PRMT5_e11_123.12	RMT	691	24	20.912		PRMT5_e11_123.12	RMT	917	12	28.7542
PRMT5_e11_123.13	RMT	643	22	21.1701		PRMT5_e11_123.13	RMT	1036	45	8.86673
PRMT5_e11_123.14	RMT	2171	340	4.77199		PRMT5_e11_123.14	RMT	3308	483	2.65839
PRMT5_e12_106.10	RMT	2219	153	10.8098		PRMT5_e12_106.10	RMT	3020	143	8.18167
PRMT5_e12_106.3	RMT	1432	406	2.63688		PRMT5_e12_106.3	RMT	2094	258	3.14813
PRMT5_e12_106.4	RMT	1098	608	1.35095		PRMT5_e12_106.4	RMT	1740	678	0.996369
PRMT6_e1_281.34	RMT	1020	1101	0.693413		PRMT6_e1_281.34	RMT	1636	841	0.755329
PRMT6_e1_281.50	RMT	474	615	0.576566		PRMT6_e1_281.50	RMT	957	400	0.928495
PRMT6_e1_281.6	RMT	614	610	0.752974		PRMT6_e1_281.6	RMT	786	368	0.828831
PRMT7_e5_73.0	RMT	1018	635	1.19932		PRMT7_e5_73.0	RMT	1423	557	0.991736
PRMT7_e5_73.1	RMT	1050	1134	0.693049		PRMT7_e5_73.1	RMT	1792	733	0.94919
PRMT7_e5_73.2	RMT	945	741	0.954222		PRMT7_e5_73.2	RMT	1398	590	0.919854
PRMT7_e6_79.2	RMT	1988	2402	0.619701		PRMT7_e6_79.2	RMT	2795	1933	0.561581
PRMT7_e6_79.3	RMT	772	249	2.3152		PRMT7_e6_79.3	RMT	1226	237	2.00623
PRMT8_e3_68.3	RMT	872	1180	0.553138		PRMT8_e3_68.3	RMT	1357	834	0.631773
PRMT8_e3_68.8	RMT	1407	2010	0.524096		PRMT8_e3_68.8	RMT	2252	1175	0.74428
PRMT8_e4_64.0	RMT	1815	2103	0.646185		PRMT8_e4_64.0	RMT	2835	1336	0.824081
PRMT8_e4_64.1	RMT	2077	1893	0.821464		PRMT8_e4_64.1	RMT	3279	1721	0.739966
PRMT8_e4_64.2	RMT	653	1057	0.462386		PRMT8_e4_64.2	RMT	1077	583	0.717145
PRMT8_e5_143.10	RMT	1073	1147	0.700208		PRMT8_e5_143.10	RMT	1509	777	0.754051
PRMT8_e5_143.11	RMT	1870	1433	0.976884		PRMT8_e5_143.11	RMT	3041	1225	0.964033
PRMT8_e5_143.13	RMT	1300	1600	0.608267		PRMT8_e5_143.13	RMT	1990	1279	0.604227
PRMT9_e4_168.0	RMT	1688	1560	0.810054		PRMT9_e4_168.0	RMT	2716	1289	0.818268
PRMT9_e4_168.4	ATPase	2584	1918	1.00867		PRMT9_e4_168.4	ATPase	4109	1583	1.00809
PRMT9_e4_168.5	ATPase	2191	2274	0.721412		PRMT9_e4_168.5	ATPase	3557	1798	0.768333
PRMT9_e4_168.6	ATPase	903	963	0.701775		PRMT9_e4_168.6	ATPase	1529	672	0.883358
PRMT9_e4_168.7	ATPase	828	852	0.72725		PRMT9_e4_168.7	ATPase	1287	571	0.874977
RAD54L_D_e7_237.21	ATPase	2724	401	5.0784		RAD54L_D_e7_237.21	ATPase	3573	499	2.77935
RAD54L_D_e8_125.10	ATPase	700	248	2.10771		RAD54L_D_e8_125.10	ATPase	1115	238	1.81693
RAD54L_D_e9_95.6	ATPase	580	273	1.5869		RAD54L_D_e9_95.6	ATPase	750	262	1.11037
RAD54L_H_e14_124.7	ATPase	2133	1024	1.55901		RAD54L_H_e14_124.7	ATPase	3222	585	2.13811
RAD54L_H_e15_79.0	ATPase	1938	732	1.98095		RAD54L_H_e15_79.0	ATPase	2991	632	1.83731
RAD54L_H_e16_180.9	ATPase	1015	618	1.22864		RAD54L_H_e16_180.9	ATPase	1661	360	1.79039
RAD54L2_D_e10_135.5	ATPase	957	989	0.724205		RAD54L2_D_e10_135.5	ATPase	1709	519	1.2782
RAD54L2_D_e7_118.9	ATPase	2311	1778	0.973105		RAD54L2_D_e7_118.9	ATPase	3036	1413	0.834429
RAD54L2_D_e8_134.9	ATPase	574	435	0.98662		RAD54L2_D_e8_134.9	ATPase	1144	488	0.909934
RAD54L2_D_e9_197.16	ATPase	1952	2244	0.651308		RAD54L2_D_e9_197.16	ATPase	3259	2104	0.6016
RAD54L2_H_e13_119.0	ATPase	1455	866	1.25731		RAD54L2_H_e13_119.0	ATPase	1893	673	1.09203
RAD54L2_H_e14_119.4	ATPase	926	652	1.06253		RAD54L2_H_e14_119.4	ATPase	1294	594	0.845694
RAD54L2_H_e15_100.9	ATPase	1884	1211	1.16451		RAD54L2_H_e15_100.9	ATPase	3313	947	1.35845
RAD54L2_H_e16_135.7	ATPase	1446	924	1.17117		RAD54L2_H_e16_135.7	ATPase	2117	664	1.23779
Rosa26	positive _control	5237	15351	0.255505		Rosa26	positive _control	5337	12469	0.166265
RPA3_e1.1	positive _control	1337	171	5.83058		RPA3_e1.1	positive _control	1857	2706	0.266545
RPA3_e1.2	positive _control	2283	442	3.86209		RPA3_e1.2	positive _control	3099	2843	0.423384
RPA3_e1.3	positive _control	483	4675	0.0773696		RPA3_e1.3	positive _control	758	4296	0.0685354
RPA3_e2.1	positive _control	444	414	0.801811		RPA3_e2.1	positive _control	769	297	1.0045
RPL23A_e2.1	positive _control	3890	5255	0.554357		RPL23A_e2.1	positive _control	5702	3605	0.614362
RPL23A_e2.2	positive _control	1080	31	25.4782		RPL23A_e2.2	positive _control	1567	29	20.7129
RPL23A_e3.1	positive _control	1243	139	6.66188		RPL23A_e3.1	positive _control	2014	15	50.8409
RPL9_e3.1	positive _control	1036	480	1.61405		RPL9_e3.1	positive _control	1720	347	1.92337
RPL9_e3.2	positive _control	1188	12	69.7935		RPL9_e3.2	positive _control	1587	59	10.3806
RPL9_e4.1	positive _control	702	0	702		RPL9_e4.1	positive _control	1003	5	72.3078
RPL9_e4.2	positive _control	734	0	734		RPL9_e4.2	positive _control	1305	15	32.9431
SCRAP_D_e14_137.13	ATPase	1577	29	39.704		SCRAP_D_e14_137.13	ATPase	2340	80	11.3076
SCRAP_D_e14_137.15	ATPase	667	192	2.59184		SCRAP_D_e14_137.15	ATPase	999	235	1.64865
SCRAP_D_e15_170.7	ATPase	648	15	30.8175		SCRAP_D_e15_170.7	ATPase	1131	55	7.93218
SCRAP_D_e15_170.8	ATPase	433	275	1.17611		SCRAP_D_e15_170.8	ATPase	478	291	0.637243
SCRAP_H_e28_170.10	ATPase	645	15	30.6748		SCRAP_H_e28_170.10	ATPase	1061	12	33.2696
SCRAP_H_e29_197.18	ATPase	568	33	12.6056		SCRAP_H_e29_197.18	ATPase	898	48	7.20915
SETD1A_e17_120.4	SET	818	65	9.31834		SETD1A_e17_120.4	SET	1355	79	6.63027
SETD1A_e18_138.0	SET	433	82	3.91922		SETD1A_e18_138.0	SET	627	35	6.88264
SETD1A_e18_138.16	SET	995	213	3.48653		SETD1A_e18_138.16	SET	1620	156	4.02402
SETD1A_e18_138.17	SET	1580	197	5.98435		SETD1A_e18_138.17	SET	2303	320	2.79233
SETD1A_e19_118.2	SET	609	210	2.16434		SETD1A_e19_118.2	SET	891	336	1.02893
SETD1A_e19_118.5	SET	5955	1709	2.6087		SETD1A_e19_118.5	SET	9361	1319	2.75613
SETD1A_e19_118.6	SET	3182	904	2.63419		SETD1A_e19_118.6	SET	5327	664	3.11466
SETD1B_e15_95.7	SET	664	117	4.22362		SETD1B_e15_95.7	SET	883	161	2.12538
SETD1B_e16_138.10	SET	1922	816	1.76254		SETD1B_e16_138.10	SET	3036	721	1.63487
SETD1B_e16_138.11	SET	1102	32	25.2033		SETD1B_e16_138.11	SET	1736	20	33.0761
SETD1B_e16_138.9	SET	1396	141	7.37632		SETD1B_e16_138.9	SET	1930	213	3.51347
SETD1B_e17_118.1	SET	1534	138	8.28075		SETD1B_e17_118.1	SET	2261	80	10.9259
SETD1B_e17_118.2	SET	1404	484	2.16932		SETD1B_e17_118.2	SET	2330	423	2.1378
SETD1B_e17_118.3	SET	2108	264	5.96363		SETD1B_e17_118.3	SET	3065	258	4.60794
SETD2_e5_124.1	SET	2380	1656	1.07596		SETD2_e5_124.1	SET	4070	1526	1.03581
SETD2_e5_124.2	SET	590	345	1.2781		SETD2_e5_124.2	SET	692	339	0.792061
SETD2_e5_124.5	SET	1427	1285	0.83127		SETD2_e5_124.5	SET	2035	855	0.924167
SETD2_e6_78.0	SET	1080	1686	0.479565		SETD2_e6_78.0	SET	1781	1040	0.664994
SETD2_e7_98.0	SET	1843	1196	1.15344		SETD2_e7_98.0	SET	2802	846	1.28602
SETD2_e7_98.2	SET	3041	2159	1.0546		SETD2_e7_98.2	SET	4623	1540	1.16585
SETD2_e7_98.3	SET	1724	1215	1.06211		SETD2_e7_98.3	SET	2592	936	1.0753
SETD4_e6_175.12	SET	929	406	1.71066		SETD4_e6_175.12	SET	1175	413	1.10415
SETD4_e6_175.16	SET	1541	1837	0.628045		SETD4_e6_175.16	SET	2026	1414	0.556442
SETD4_e6_175.19	SET	547	438	0.933782		SETD4_e6_175.19	SET	766	435	0.683441
SETD4_e7_103.0	SET	1251	940	0.995997		SETD4_e7_103.0	SET	1822	701	1.00911
SETD4_e7_103.2	SET	1554	1541	0.754939		SETD4_e7_103.2	SET	2443	823	1.15257
SETD5_e10_118.2	SET	2930	2032	1.07959		SETD5_e10_118.2	SET	4368	1472	1.15242
SETD5_e10_118.4	SET	2864	2666	0.804387		SETD5_e10_118.4	SET	4610	2056	0.870854
SETD5_e10_118.5	SET	1240	738	1.25718		SETD5_e10_118.5	SET	1896	726	1.01396
SETD5_e11_110.0	SET	2919	3773	0.579343		SETD5_e11_110.0	SET	4147	2298	0.700906
SETD5_e11_110.1	SET	1613	1874	0.644415		SETD5_e11_110.1	SET	2265	1134	0.775632
SETD5_e9_105.1	SET	445	350	0.95025		SETD5_e9_105.1	SET	471	321	0.569298
SETD5_e9_105.2	SET	501	343	1.09162		SETD5_e9_105.2	SET	708	412	0.666924
SETD6_e4_118.10	SET	744	262	2.12083		SETD6_e4_118.10	SET	1207	243	1.92645
SETD6_e4_118.16	SET	2486	1317	1.413		SETD6_e4_118.16	SET	3776	1073	1.36655
SETD6_e4_118.19	SET	1307	1661	0.589094		SETD6_e4_118.19	SET	2191	1288	0.66061
SETD6_e5_121.11	SET	1450	855	1.2691		SETD6_e5_121.11	SET	1996	636	1.21839
SETD6_e5_121.2	SET	530	154	2.56521		SETD6_e5_121.2	SET	777	122	2.46621
SETD6_e5_121.3	SET	1077	1381	0.583796		SETD6_e5_121.3	SET	1304	837	0.604923
SETD6_e6_67.6	SET	2183	1181	1.38358		SETD6_e6_67.6	SET	3234	837	1.50025
SETD7_e6_86.0	SET	1863	2480	0.562477		SETD7_e6_86.0	SET	2821	1558	0.703197
SETD7_e6_86.1	SET	982	824	0.891793		SETD7_e6_86.1	SET	1267	656	0.749834
SETD7_e6_86.2	SET	556	621	0.669783		SETD7_e6_86.2	SET	736	477	0.598901
SETD7_e7_158.10	SET	1567	1300	0.902298		SETD7_e7_158.10	SET	2315	1149	0.782408
SETD7_e7_158.11	SET	1924	1325	1.08697		SETD7_e7_158.11	SET	2865	1044	1.06564
SETD7_e7_158.13	SET	415	339	0.91488		SETD7_e7_158.13	SET	639	373	0.664797
SETD7_e8_95.11	SET	1264	739	1.27979		SETD7_e8_95.11	SET	1568	622	0.978665
SETD7_e8_95.12	SET	1685	880	1.43292		SETD7_e8_95.12	SET	2056	722	1.10561
SETD7_e8_95.8	SET	1214	882	1.03004		SETD7_e8_95.8	SET	1836	799	0.892204
SETD8_e7_190.11	SET	474	12	27.8469		SETD8_e7_190.11	SET	686	3	78.6449
SETD8_e7_190.14	SET	1417	700	1.51454		SETD8_e7_190.14	SET	1974	518	1.47925
SETD8_e7_190.18	SET	1884	62	22.4879		SETD8_e7_190.18	SET	2536	54	18.1131
SETD8_e8_158.0	SET	743	19	28.1785		SETD8_e8_158.0	SET	1237	10	46.256
SETD8_e8_158.5	SET	985	778	0.947356		SETD8_e8_158.5	SET	1651	466	1.37515
SETDB1_e20_55.0	SET	1388	1477	0.703499		SETDB1_e20_55.0	SET	2284	1361	0.651724
SETDB1_e20_55.1	SET	1110	672	1.23579		SETDB1_e20_55.1	SET	1529	628	0.945211
SETDB1_e20_55.3	SET	1087	353	2.30149		SETDB1_e20_55.3	SET	1646	402	1.58904
SETDB1_e21_89.0	SET	2791	2364	0.883994		SETDB1_e21_89.0	SET	3728	1797	0.805718
SETDB1_e21_89.8	SET	1564	406	2.87995		SETDB1_e21_89.8	SET	2574	459	2.1766
SETDB1_e21_89.9	SET	889	173	3.83225		SETDB1_e21_89.9	SET	1156	262	1.71144
SETDB1_e22_45.0	SET	3000	948	2.36834		SETDB1_e22_45.0	SET	4347	1006	1.67793
SETDB1_e22_45.1	SET	1606	362	3.31599		SETDB1_e22_45.1	SET	2546	475	2.08046
SETDB1_e22_45.2	SET	1012	1199	0.631778		SETDB1_e22_45.2	SET	1444	944	0.593972
SETDB2_e13_63.1	SET	1280	1719	0.557467		SETDB2_e13_63.1	SET	1906	1069	0.692368
SETDB2_e14_89.3	SET	2157	1615	0.999886		SETDB2_e14_89.3	SET	2973	1433	0.805713
SETDB2_e14_89.4	SET	791	681	0.869013		SETDB2_e14_89.4	SET	1219	685	0.690902
SETDB2_e14_89.5	SET	1456	1272	0.856827		SETDB2_e14_89.5	SET	2353	838	1.09025
SETMAR_e2_380.19	SET	1887	1798	0.785734		SETMAR_e2_380.19	SET	2760	1208	0.887262
SETMAR_e2_380.24	SET	1900	1377	1.0329		SETMAR_e2_380.24	SET	2722	1349	0.783611
SETMAR_e2_380.25	SET	1252	814	1.15095		SETMAR_e2_380.25	SET	1653	741	0.866117
SETMAR_e2_380.4	SET	1528	1449	0.789414		SETMAR_e2_380.4	SET	2560	1247	0.797237
SETMAR_e2_380.5	SET	1356	1906	0.532648		SETMAR_e2_380.5	SET	2106	1170	0.699001
SHPRH_H_e26_93.1	ATPase	450	428	0.786111		SHPRH_H_e26_93.1	ATPase	716	237	1.17166
SHPRH_H_e26_93.4	ATPase	813	863	0.704981		SHPRH_H_e26_93.4	ATPase	1328	755	0.682931
SHPRH_H_e26_93.5	ATPase	1043	1300	0.600572		SHPRH_H_e26_93.5	ATPase	1570	675	0.903016
SHPRH_H_e27_179.10	ATPase	2193	1876	0.875199		SHPRH_H_e27_179.10	ATPase	3545	1116	1.23353
SHPRH_H_e27_179.16	ATPase	2862	2157	0.993443		SHPRH_H_e27_179.16	ATPase	4289	1840	0.905307
SHPRH_H_e27_179.9	ATPase	1722	1198	1.07592		SHPRH_H_e27_179.9	ATPase	2166	735	1.14417
SIRT1_e4_153.5	hydroxylase	1662	2291	0.543173		SIRT1_e4_153.5	hydroxylase	2617	1375	0.739142
SIRT1_e4_153.6	hydroxylase	537	798	0.503545		SIRT1_e4_153.6	hydroxylase	1037	651	0.618426
SIRT1_e5_148.2	hydroxylase	714	341	1.56482		SIRT1_e5_148.2	hydroxylase	1062	463	0.890284
SIRT1_e5_148.3	hydroxylase	774	447	1.29473		SIRT1_e5_148.3	hydroxylase	1234	336	1.42503
SIRT1_e6_80.0	hydroxylase	737	580	0.950503		SIRT1_e6_80.0	hydroxylase	1122	516	0.844045
SIRT1_e7_187.11	hydroxylase	715	570	0.938286		SIRT1_e7_187.11	hydroxylase	972	450	0.838356
SIRT1_e7_187.14	hydroxylase	1024	870	0.880808		SIRT1_e7_187.14	hydroxylase	1702	712	0.928094
SIRT2_e10_60.1	hydroxylase	619	477	0.970432		SIRT2_e10_60.1	hydroxylase	1109	343	1.25457
SIRT2_e11_56.0	hydroxylase	371	113	2.44287		SIRT2_e11_56.0	hydroxylase	459	87	2.04037
SIRT2_e12_77.3	hydroxylase	1813	427	3.17456		SIRT2_e12_77.3	hydroxylase	2838	309	3.56334
SIRT2_e13_52.4	hydroxylase	542	237	1.70748		SIRT2_e13_52.4	hydroxylase	771	98	3.0441
SIRT2_e14_70.3	hydroxylase	565	143	2.94387		SIRT2_e14_70.3	hydroxylase	858	56	5.9108
SIRT2_e6_107.11	hydroxylase	1195	154	5.78382		SIRT2_e6_107.11	hydroxylase	1803	106	6.5834
SIRT2_e7_57.7	hydroxylase	538	447	0.899958		SIRT2_e7_57.7	hydroxylase	824	256	1.24847
SIRT2_e8_69.0	hydroxylase	1454	1385	0.785876		SIRT2_e8_69.0	hydroxylase	2197	1046	0.815617
SIRT2_e9_130.10	hydroxylase	563	215	1.95449		SIRT2_e9_130.10	hydroxylase	811	194	1.62069
SIRT3_e3_210.0	hydroxylase	944	556	1.26995		SIRT3_e3_210.0	hydroxylase	1231	657	0.72742
SIRT3_e3_210.28	hydroxylase	773	599	0.965349		SIRT3_e3_210.28	hydroxylase	1326	273	1.88414
SIRT3_e4_101.10	hydroxylase	1304	773	1.26227		SIRT3_e4_101.10	hydroxylase	1726	369	1.81513
SIRT3_e5_162.21	hydroxylase	689	312	1.65005		SIRT3_e5_162.21	hydroxylase	1003	391	0.995502
SIRT3_e6_158.32	hydroxylase	815	1005	0.606935		SIRT3_e6_158.32	hydroxylase	1258	736	0.663625
SIRT4_e2_341.15	hydroxylase	735	187	2.93214		SIRT4_e2_341.15	hydroxylase	1172	243	1.87058
SIRT4_e2_341.60	hydroxylase	1205	86	10.4039		SIRT4_e2_341.60	hydroxylase	1513	280	2.09618
SIRT4_e3_210.14	hydroxylase	2475	1454	1.27427		SIRT4_e3_210.14	hydroxylase	3521	906	1.50904
SIRT4_e3_210.19	hydroxylase	409	263	1.16147		SIRT4_e3_210.19	hydroxylase	640	183	1.35568
SIRT4_e4_158.10	hydroxylase	889	206	3.22057		SIRT4_e4_158.10	hydroxylase	1026	121	3.28337
SIRT4_e4_158.9	hydroxylase	845	535	1.18133		SIRT4_e4_158.9	hydroxylase	1294	287	1.7491
SIRT5_e5_210.25	hydroxylase	970	858	0.846019		SIRT5_e5_210.25	hydroxylase	1355	542	0.970461
SIRT5_e5_210.7	hydroxylase	986	987	0.747661		SIRT5_e5_210.7	hydroxylase	1494	867	0.669093
SIRT5_e6_88.0	hydroxylase	1484	1436	0.773619		SIRT5_e6_88.0	hydroxylase	2215	951	0.90441
SIRT5_e7_54.0	hydroxylase	888	1085	0.612573		SIRT5_e7_54.0	hydroxylase	1733	544	1.23663
SIRT5_e8_124.3	hydroxylase	1174	1678	0.523789		SIRT5_e8_124.3	hydroxylase	1906	1162	0.636973
SIRT5_e9_116.7	hydroxylase	1570	1609	0.730493		SIRT5_e9_116.7	hydroxylase	2281	1058	0.837201
SIRT6_e3_183.25	hydroxylase	1547	1345	0.860995		SIRT6_e3_183.25	hydroxylase	2267	1315	0.669494
SIRT6_e3_183.4	hydroxylase	894	1059	0.631843		SIRT6_e3_183.4	hydroxylase	1201	691	0.674793
SIRT6_e4_60.2	hydroxylase	1650	1176	1.05021		SIRT6_e4_60.2	hydroxylase	2830	991	1.1089
SIRT6_e4_60.3	hydroxylase	2295	1764	0.974034		SIRT6_e4_60.3	hydroxylase	3300	1454	0.88142
SIRT6_e5_96.0	hydroxylase	4397	3280	1.00382		SIRT6_e5_96.0	hydroxylase	6570	2458	1.03816
SIRT6_e5_96.1	hydroxylase	2436	1377	1.32429		SIRT6_e5_96.1	hydroxylase	3524	1219	1.12265
SIRT6_e6_81.6	hydroxylase	1056	730	1.08236		SIRT6_e6_81.6	hydroxylase	1369	538	0.987773
SIRT6_e6_81.7	hydroxylase	738	799	0.691158		SIRT6_e6_81.7	hydroxylase	1096	827	0.514577
SIRT6_e7_124.0	hydroxylase	1294	1642	0.58998		SIRT6_e7_124.0	hydroxylase	2022	1127	0.696718
SIRT6_e7_124.20	hydroxylase	713	223	2.38673		SIRT6_e7_124.20	hydroxylase	761	277	1.06573
SIRT7_e4_70.10	hydroxylase	945	823	0.859234		SIRT7_e4_70.10	hydroxylase	1223	853	0.55671
SIRT7_e4_70.2	hydroxylase	547	431	0.948922		SIRT7_e4_70.2	hydroxylase	701	265	1.02609
SIRT7_e5_73.1	hydroxylase	2095	1405	1.11622		SIRT7_e5_73.1	hydroxylase	3190	940	1.31775
SIRT7_e5_73.8	hydroxylase	1009	445	1.69541		SIRT7_e5_73.8	hydroxylase	1506	455	1.28467
SIRT7_e6_99.10	hydroxylase	885	866	0.764759		SIRT7_e6_99.10	hydroxylase	1484	744	0.774433
SIRT7_e6_99.9	hydroxylase	626	358	1.30695		SIRT7_e6_99.9	hydroxylase	894	364	0.953064
SIRT7_e7_210.3	hydroxylase	621	373	1.24447		SIRT7_e7_210.3	hydroxylase	854	252	1.31443
SIRT7_e7_210.4	hydroxylase	1483	1087	1.02114		SIRT7_e7_210.4	hydroxylase	1812	788	0.892827
SIRT7_e8_81.4	hydroxylase	889	841	0.791031		SIRT7_e8_81.4	hydroxylase	1310	872	0.583325
SIRT7_e8_81.6	hydroxylase	1639	953	1.28712		SIRT7_e8_81.6	hydroxylase	2450	863	1.10232
SMARCA2_BD_e28_218.0	BD	2055	1702	0.903932		SMARCA2_BD_e28_218.0	BD	3334	1471	0.880213
SMARCA2_BD_e28_218.15	BD	480	339	1.05817		SMARCA2_BD_e28_218.15	BD	708	379	0.724934
SMARCA2_BD_e28_218.19	BD	1696	2409	0.527143		SMARCA2_BD_e28_218.19	BD	2502	1856	0.523562
SMARCA2_BD_e29_54.0	BD	1993	2667	0.559547		SMARCA2_BD_e29_54.0	BD	3131	1510	0.805274
SMARCA2_BD_e29_54.2	BD	898	868	0.774206		SMARCA2_BD_e29_54.2	BD	1303	885	0.571689
SMARCA2_BD_e29_54.3	BD	1950	1895	0.770421		SMARCA2_BD_e29_54.3	BD	2856	1531	0.724473
SMARCA2_D_e15_118.0	ATPase	1021	1373	0.556663		SMARCA2_D_e15_118.0	ATPase	1495	996	0.582857
SMARCA2_D_e16_67.2	ATPase	2551	2119	0.901364		SMARCA2_D_e16_67.2	ATPase	4112	1689	0.945525
SMARCA2_D_e17_111.10	ATPase	391	416	0.702711		SMARCA2_D_e17_111.10	ATPase	571	203	1.09058
SMARCA2_D_e18_135.13	ATPase	1955	1748	0.837324		SMARCA2_D_e18_135.13	ATPase	2910	1501	0.752921
SMARCA2_H_e23_167.0	ATPase	1042	1001	0.779082		SMARCA2_H_e23_167.0	ATPase	1503	963	0.606048
SMARCA2_H_e24_164.7	ATPase	729	1043	0.523125		SMARCA2_H_e24_164.7	ATPase	1000	665	0.583813
SMARCA2_H_e25_59.1	ATPase	995	759	0.980906		SMARCA2_H_e25_59.1	ATPase	1486	598	0.964684
SMARCA4_BD_e31_52.1	BD	1410	1041	1.01375		SMARCA4_BD_e31_52.1	BD	2050	694	1.14683
SMARCA4_BD_e32_109.6	BD	1247	385	2.42123		SMARCA4_BD_e32_109.6	BD	1668	323	2.00365
SMARCA4_BD_e32_109.8	BD	2561	1979	0.968889		SMARCA4_BD_e32_109.8	BD	3897	1865	0.811541
SMARCA4_BD_e32_109.9	BD	1662	549	2.26434		SMARCA4_BD_e32_109.9	BD	2840	401	2.74854
SMARCA4_BD_e33_102.10	BD	2773	1587	1.3081		SMARCA4_BD_e33_102.10	BD	3869	1459	1.02986
SMARCA4_BD_e33_102.5	BD	1036	314	2.4653		SMARCA4_BD_e33_102.5	BD	1551	407	1.47895
SMARCA4_BD_e33_102.8	BD	2984	2698	0.828153		SMARCA4_BD_e33_102.8	BD	4050	2269	0.693259
SMARCA4_BD_e34_59.1	BD	925	281	2.45897		SMARCA4_BD_e34_59.1	BD	1461	198	2.86077
SMARCA4_BD_e34_59.2	BD	997	388	1.92088		SMARCA4_BD_e34_59.2	BD	1304	222	2.2778
SMARCAD1_D_e12_100.3	ATPase	781	389	1.50086		SMARCAD1_D_e12_100.3	ATPase	1316	339	1.50629
SMARCAD1_D_e13_60.1	ATPase	2878	2060	1.04602		SMARCAD1_D_e13_60.1	ATPase	4158	1503	1.07439
SMARCAD1_D_e15_136.0	ATPase	696	622	0.837087		SMARCAD1_D_e15_136.0	ATPase	1126	524	0.834132
SMARCAD1_H_e21_119.0	ATPase	1180	702	1.25764		SMARCAD1_H_e21_119.0	ATPase	1699	583	1.13132
SMARCAD1_H_e22_183.0	ATPase	1584	1601	0.740688		SMARCAD1_H_e22_183.0	ATPase	2543	1238	0.797699
SMARCAL1_D_e10_66.2	ATPase	398	226	1.31466		SMARCAL1_D_e10_66.2	ATPase	444	151	1.1393
SMARCAL1_D_e8_135.4	ATPase	1562	2571	0.454911		SMARCAL1_D_e8_135.4	ATPase	2529	1743	0.563513
SMARCAL1_D_e9_159.0	ATPase	973	881	0.826499		SMARCAL1_D_e9_159.0	ATPase	1588	824	0.748287
SMARCAL1_H_e14_103.5	ATPase	550	974	0.422614		SMARCAL1_H_e14_103.5	ATPase	778	710	0.425435
SMARCAL1_H_e15_183.0	ATPase	1827	1447	0.945191		SMARCAL1_H_e15_183.0	ATPase	2501	887	1.09484
SMARCAL1_H_e16_50.0	ATPase	1504	883	1.27466		SMARCAL1_H_e16_50.0	ATPase	2143	657	1.26634
SMYD1_e4_86.3	SET	951	712	0.999352		SMYD1_e4_86.3	SET	1270	497	0.991876
SMYD1_e4_86.7	SET	1406	1497	0.703106		SMYD1_e4_86.7	SET	2608	1147	0.882971
SMYD1_e6_73.0	SET	2138	1984	0.80682		SMYD1_e6_73.0	SET	2833	1611	0.682961
SMYD1_e6_73.3	SET	934	918	0.76142		SMYD1_e6_73.3	SET	1648	660	0.969409
SMYD2_e6_55.0	SET	2481	2853	0.651156		SMYD2_e6_55.0	SET	3723	2424	0.596541
SMYD2_e7_103.5	SET	490	396	0.925027		SMYD2_e7_103.5	SET	582	125	1.80308
SMYD2_e7_103.9	SET	4332	2076	1.56235		SMYD2_e7_103.9	SET	6342	1519	1.62146
SMYD3_e5_95.2	SET	1110	1647	0.504552		SMYD3_e5_95.2	SET	1913	1014	0.732588
SMYD3_e5_95.3	SET	552	648	0.63729		SMYD3_e5_95.3	SET	657	455	0.560445
SMYD3_e6_68.1	SET	238	300	0.592717		SMYD3_e6_68.1	SET	368	206	0.692647
SMYD3_e6_68.3	SET	1004	889	0.845163		SMYD3_e6_68.3	SET	1644	1040	0.613841
SMYD3_e6_68.4	SET	1704	2454	0.51992		SMYD3_e6_68.4	SET	2344	1590	0.572537
SMYD3_e7_103.2	SET	1738	1667	0.780537		SMYD3_e7_103.2	SET	2456	1588	0.600649
SMYD3_e7_103.4	SET	1184	714	1.24072		SMYD3_e7_103.4	SET	1792	569	1.22258
SMYD3_e7_103.7	SET	1595	1713	0.697088		SMYD3_e7_103.7	SET	2396	1019	0.913054
SMYD4_e5_95.0	SET	3138	3015	0.779349		SMYD4_e5_95.0	SET	4647	2295	0.78644
SMYD4_e5_95.4	SET	478	210	1.69878		SMYD4_e5_95.4	SET	811	169	1.85989
SMYD4_e5_95.5	SET	908	616	1.10269		SMYD4_e5_95.5	SET	1216	569	0.829611
SMYD4_e6_183.0	SET	901	581	1.16001		SMYD4_e6_183.0	SET	1092	535	0.792324
SMYD4_e6_183.6	SET	1271	1911	0.497954		SMYD4_e6_183.6	SET	2242	1392	0.625496
SMYD4_e6_183.9	SET	983	1443	0.50996		SMYD4_e6_183.9	SET	1358	1025	0.514471
SMYD5_SET1_e10_57.0	SET	1262	805	1.1731		SMYD5_SET1_e10_57.0	SET	1486	690	0.836132
SMYD5_SET1_e10_57.1	SET	797	900	0.662718		SMYD5_SET1_e10_57.1	SET	1234	511	0.937376
SMYD5_SET1_e10_57.2	SET	556	242	1.7155		SMYD5_SET1_e10_57.2	SET	757	236	1.244
SMYD5_SET1_e11_95.0	SET	431	267	1.20566		SMYD5_SET1_e11_95.0	SET	722	149	1.87745
SMYD5_SET1_e11_95.2	SET	312	148	1.571		SMYD5_SET1_e11_95.2	SET	511	118	1.67672
SMYD5_SET1_e11_95.9	SET	1679	662	1.89747		SMYD5_SET1_e11_95.9	SET	2698	450	2.32704
SMYD5_SET1_e2__73.5	SET	711	664	0.801099		SMYD5_SET1_e2__73.5	SET	827	450	0.713292
SMYD5_SET1_e2__73.6	SET	582	179	2.42511		SMYD5_SET1_e2__73.6	SET	829	209	1.53798
SMYD5_SET1_e2__73.8	SET	1547	417	2.77363		SMYD5_SET1_e2__73.8	SET	1996	452	1.71395
SP100_BD_e27_72.1	BD	1144	1285	0.666414		SP100_BD_e27_72.1	BD	1573	738	0.827548
SP100_BD_e27_72.2	BD	1481	1261	0.879137		SP100_BD_e27_72.2	BD	1943	1078	0.699918
SP100_BD_e28_144.1	BD	1675	1985	0.631779		SP100_BD_e28_144.1	BD	2006	1193	0.652978
SP100_BD_e28_144.2	BD	1013	1051	0.721393		SP100_BD_e28_144.2	BD	1272	786	0.628347
SP100_BD_e28_144.3	BD	542	539	0.752111		SP100_BD_e28_144.3	BD	737	454	0.630071
SP100_BD_e29_79.0	BD	1072	1563	0.513455		SP100_BD_e29_79.0	BD	1645	972	0.657167
SP100_BD_e29_79.3	BD	2071	2922	0.530717		SP100_BD_e29_79.3	BD	3037	1865	0.632448
SP140_BD_e27_79.3	BD	1505	1316	0.856067		SP140_BD_e27_79.3	BD	2250	1180	0.740469
SP140L_BD_e19_73.2	BD	778	866	0.672296		SP140L_BD_e19_73.2	BD	1191	765	0.604476
SUV39H1_e3_105.1	SET	519	867	0.447969		SUV39H1_e3_105.1	SET	833	466	0.69382
SUV39H1_e3_105.10	SET	1816	409	3.3195		SUV39H1_e3_105.10	SET	2319	591	1.52327
SUV39H1_e3_105.3	SET	781	760	0.768925		SUV39H1_e3_105.3	SET	852	540	0.612467
SUV39H1_e4_147.19	SET	342	533	0.479914		SUV39H1_e4_147.19	SET	518	254	0.79101
SUV39H1_e4_147.4	SET	2210	1182	1.3995		SUV39H1_e4_147.4	SET	3290	1271	1.00523
SUV39H1_e4_147.5	SET	1439	524	2.05392		SUV39H1_e4_147.5	SET	2150	615	1.35718
SUV39H1_e5_130.10	SET	555	644	0.644728		SUV39H1_e5_130.10	SET	887	403	0.85418
SUV39H1_e5_130.11	SET	1184	661	1.34009		SUV39H1_e5_130.11	SET	1791	467	1.48856
SUV39H1_e5_130.3	SET	892	302	2.20677		SUV39H1_e5_130.3	SET	1194	233	1.98735
SUV39H2_e3_105.1	SET	945	1382	0.511874		SUV39H2_e3_105.1	SET	1342	909	0.573261
SUV39H2_e3_105.2	SET	1702	1912	0.666463		SUV39H2_e3_105.2	SET	2304	1390	0.643718
SUV39H2_e3_105.3	SET	1014	956	0.793806		SUV39H2_e3_105.3	SET	1348	708	0.73921
SUV39H2_e4_147.1	SET	1833	1949	0.704139		SUV39H2_e4_147.1	SET	2710	1530	0.687887
SUV39H2_e4_147.3	SET	827	946	0.654252		SUV39H2_e4_147.3	SET	1175	545	0.836915
SUV39H2_e4_147.6	SET	1579	1323	0.89341		SUV39H2_e4_147.6	SET	2414	815	1.15006
SUV39H2_e5_130.0	SET	353	213	1.23693		SUV39H2_e5_130.0	SET	435	152	1.10889
SUV39H2_e5_130.5	SET	1312	1738	0.56516		SUV39H2_e5_130.5	SET	2072	1159	0.694241
SUV39H2_e5_130.6	SET	728	757	0.719582		SUV39H2_e5_130.6	SET	965	525	0.713504
SUV420H1_e6_45.0	SET	1829	2639	0.51895		SUV420H1_e6_45.0	SET	2689	1801	0.579873
SUV420H1_e7_167.4	SET	1079	859	0.939992		SUV420H1_e7_167.4	SET	1636	798	0.79601
SUV420H1_e7_167.5	SET	2383	2154	0.828327		SUV420H1_e7_167.5	SET	3285	1703	0.749154
SUV420H1_e7_167.7	SET	1315	1866	0.527611		SUV420H1_e7_167.7	SET	2105	1370	0.596702
SUV420H1_e9_105.0	SET	414	183	1.68752		SUV420H1_e9_105.0	SET	601	270	0.863447
SUV420H1_e9_105.1	SET	881	838	0.786717		SUV420H1_e9_105.1	SET	1550	666	0.903553
SUV420H1_e9_105.5	SET	1691	739	1.71212		SUV420H1_e9_105.5	SET	1995	650	1.19157
SUV420H2_e5_164.12	SET	947	247	2.86294		SUV420H2_e5_164.12	SET	1309	162	3.13137
SUV420H2_e5_164.16	SET	931	306	2.27322		SUV420H2_e5_164.16	SET	1398	222	2.44199
SUV420H2_e5_164.18	SET	551	288	1.42924		SUV420H2_e5_164.18	SET	878	132	2.57628
SUV420H2_e7_105.13	SET	1832	323	4.2383		SUV420H2_e7_105.13	SET	3004	210	5.54661
SUV420H2_e7_105.8	SET	2659	904	2.20123		SUV420H2_e7_105.8	SET	4072	640	2.47009
SUV420H2_e7_105.9	SET	1136	263	3.22598		SUV420H2_e7_105.9	SET	1702	251	2.63005
TAF1_BD1_e28_178.10	BD1	809	1255	0.482525		TAF1_BD1_e28_178.10	BD1	1334	791	0.65481
TAF1_BD1_e28_178.11	BD1	1053	1070	0.736572		TAF1_BD1_e28_178.11	BD1	1554	967	0.624021
TAF1_BD2_e31_93.0	BD2	1546	1438	0.80482		TAF1_BD2_e31_93.0	BD2	2491	1152	0.8397
TAF1_BD2_e32_85.3	BD2	1077	430	1.87269		TAF1_BD2_e32_85.3	BD2	1766	321	2.13457
TAF1_BD2_e33_68.0	BD2	1056	41	18.9449		TAF1_BD2_e33_68.0	BD2	1367	27	19.3888
TAF1_BD2_e33_68.1	BD2	1430	154	6.92122		TAF1_BD2_e33_68.1	BD2	2127	182	4.53022
TAF1_e13_174.15	AT	1939	2165	0.67057		TAF1_e13_174.15	AT	3008	2033	0.574655
TAF1_e15_201.1	AT	723	650	0.832145		TAF1_e15_201.1	AT	1285	488	1.02209
TAF1_e15_201.13	AT	2447	1126	1.6266		TAF1_e15_201.13	AT	3547	875	1.57402
TET1_e10_86.0	hydroxylase	519	809	0.480055		TET1_e10_86.0	hydroxylase	705	281	0.973267
TET1_e10_86.1	hydroxylase	687	407	1.26194		TET1_e10_86.1	hydroxylase	832	237	1.36149
TET1_e10_86.5	hydroxylase	279	154	1.35036		TET1_e10_86.5	hydroxylase	376	150	0.971231
TET1_e7_86.2	hydroxylase	1957	2666	0.549646		TET1_e7_86.2	hydroxylase	2703	1554	0.675516
TET1_e8_90.0	hydroxylase	1463	1524	0.718655		TET1_e8_90.0	hydroxylase	2101	1167	0.699133
TET1_e8_90.1	hydroxylase	1196	1129	0.792909		TET1_e8_90.1	hydroxylase	1961	854	0.891603
TET1_e8_90.2	hydroxylase	1693	2288	0.55403		TET1_e8_90.2	hydroxylase	2637	1392	0.735697
TET1_e9_138.1	hydroxylase	890	664	1.00278		TET1_e9_138.1	hydroxylase	1528	580	1.02271
TET1_e9_138.17	hydroxylase	2845	2952	0.721656		TET1_e9_138.17	hydroxylase	4424	1938	0.886592
TET1_e9_138.18	hydroxylase	1040	290	2.6791		TET1_e9_138.18	hydroxylase	1568	340	1.78945
TET2_e10_86.0	hydroxylase	743	715	0.777504		TET2_e10_86.0	hydroxylase	1099	585	0.729294
TET2_e10_86.1	hydroxylase	1411	1378	0.766507		TET2_e10_86.1	hydroxylase	1874	963	0.755644
TET2_e10_86.3	hydroxylase	1655	1091	1.1354		TET2_e10_86.3	hydroxylase	2519	987	0.991036
TET2_e7_86.0	hydroxylase	1498	1293	0.867234		TET2_e7_86.0	hydroxylase	2558	1056	0.940646
TET2_e7_86.2	hydroxylase	1098	1375	0.597775		TET2_e7_86.2	hydroxylase	1491	992	0.58364
TET2_e7_86.3	hydroxylase	1013	770	0.984398		TET2_e7_86.3	hydroxylase	1567	717	0.848524
TET2_e8_90.0	hydroxylase	2056	1369	1.12423		TET2_e8_90.0	hydroxylase	2879	844	1.32449
TET2_e8_90.2	hydroxylase	1334	1259	0.793133		TET2_e8_90.2	hydroxylase	2187	1016	0.835869
TET2_e8_90.3	hydroxylase	572	501	0.853855		TET2_e8_90.3	hydroxylase	928	244	1.47508
TET2_e9_138.0	hydroxylase	643	427	1.12589		TET2_e9_138.0	hydroxylase	800	379	0.819135
TET2_e9_138.1	hydroxylase	1271	639	1.48803		TET2_e9_138.1	hydroxylase	1779	652	1.0593
TET2_e9_138.14	hydroxylase	927	1062	0.653316		TET2_e9_138.14	hydroxylase	1281	583	0.852984
TET3_e10_79.0	hydroxylase	382	297	0.96092		TET3_e10_79.0	hydroxylase	676	305	0.859891
TET3_e10_79.1	hydroxylase	733	253	2.16359		TET3_e10_79.1	hydroxylase	1100	221	1.93013
TET3_e10_79.2	hydroxylase	2557	1362	1.40537		TET3_e10_79.2	hydroxylase	4019	1300	1.20059
TET3_e7_86.1	hydroxylase	804	443	1.35704		TET3_e7_86.1	hydroxylase	1285	444	1.12328
TET3_e7_86.3	hydroxylase	1642	1497	0.821124		TET3_e7_86.3	hydroxylase	2579	1446	0.692653
TET3_e7_86.4	hydroxylase	3348	2294	1.09276		TET3_e7_86.4	hydroxylase	4857	2013	0.937109
TET3_e8_90.2	hydroxylase	499	557	0.670095		TET3_e8_90.2	hydroxylase	697	393	0.688273
TET3_e8_90.5	hydroxylase	2543	819	2.32348		TET3_e8_90.5	hydroxylase	3579	957	1.45219
TET3_e8_90.9	hydroxylase	1489	965	1.15479		TET3_e8_90.9	hydroxylase	2207	672	1.27506
TET3_e9_138.0	hydroxylase	282	493	0.427777		TET3_e9_138.0	hydroxylase	346	296	0.453486
TET3_e9_138.1	hydroxylase	494	333	1.10862		TET3_e9_138.1	hydroxylase	609	213	1.10865
TET3_e9_138.2	hydroxylase	1123	705	1.1918		TET3_e9_138.2	hydroxylase	1597	553	1.12105
TIP60_e10_94.0	AT	1819	271	5.01348		TIP60_e10_94.0	AT	2559	227	4.37171
TIP60_e10_94.13	AT	1188	364	2.43948		TIP60_e10_94.13	AT	1752	330	2.05996
TIP60_e10_94.5	AT	1029	29	25.907		TIP60_e10_94.5	AT	1400	105	5.16041
TIP60_e10_94.6	AT	910	95	7.11839		TIP60_e10_94.6	AT	1430	103	5.37296
TIP60_e10_94.8	AT	586	17	24.7285		TIP60_e10_94.8	AT	885	28	12.1102
TRIM24_BD_e17_75.0	BD	597	956	0.467359		TRIM24_BD_e17_75.0	BD	870	651	0.518834
TRIM24_BD_e17_75.1	BD	353	474	0.55691		TRIM24_BD_e17_75.1	BD	509	265	0.745049
TRIM24_BD_e17_75.2	BD	1222	1381	0.662394		TRIM24_BD_e17_75.2	BD	1654	614	1.04578
TRIM24_BD_e18_150.2	BD	1295	2367	0.409646		TRIM24_BD_e18_150.2	BD	1914	1249	0.595105
TRIM24_BD_e18_150.4	BD	832	1330	0.468276		TRIM24_BD_e18_150.4	BD	1425	762	0.726086
TRIM24_BD_e19_86.0	BD	483	295	1.2232		TRIM24_BD_e19_86.0	BD	701	260	1.04579
TRIM24_BD_e19_86.1	BD	892	1386	0.481772		TRIM24_BD_e19_86.1	BD	1328	956	0.539403
TRIM24_BD_e19_86.2	BD	1215	1608	0.565669		TRIM24_BD_e19_86.2	BD	1841	976	0.732454
TRIM28_BD_e15_87.1	BD	447	139	2.3957		TRIM28_BD_e15_87.1	BD	712	127	2.1712
TRIM28_BD_e15_87.2	BD	912	346	1.96994		TRIM28_BD_e15_87.2	BD	1462	287	1.97618
TRIM28_BD_e15_87.9	BD	1285	408	2.35462		TRIM28_BD_e15_87.9	BD	1660	356	1.8094
TRIM28_BD_e16_138.19	BD	176	78	1.67395		TRIM28_BD_e16_138.19	BD	394	44	3.44807
TRIM28_BD_e16_138.20	BD	985	312	2.35893		TRIM28_BD_e16_138.20	BD	1599	333	1.86315
TRIM28_BD_e16_138.7	BD	2949	615	3.58712		TRIM28_BD_e16_138.7	BD	4105	541	2.94546
TRIM28_BD_e17_79.1	BD	1100	547	1.50413		TRIM28_BD_e17_79.1	BD	1517	477	1.23442
TRIM28_BD_e17_79.2	BD	190	277	0.51236		TRIM28_BD_e17_79.2	BD	323	92	1.35811
TRIM28_BD_e17_79.3	BD	538	165	2.43112		TRIM28_BD_e17_79.3	BD	860	103	3.23129
TRIM33_BD_e17_75.0	BD	479	422	0.848647		TRIM33_BD_e17_75.0	BD	695	254	1.0613
TRIM33_BD_e17_75.1	BD	1361	1099	0.926913		TRIM33_BD_e17_75.1	BD	2050	815	0.976649
TRIM33_BD_e17_75.2	BD	1281	1196	0.801716		TRIM33_BD_e17_75.2	BD	1774	953	0.722825
TRIM33_BD_e18_153.13	BD	1756	986	1.33288		TRIM33_BD_e18_153.13	BD	2609	714	1.41869
TRIM33_BD_e18_153.5	BD	971	688	1.05592		TRIM33_BD_e18_153.5	BD	1483	577	0.997752
TRIM33_BD_e18_153.8	BD	2268	1373	1.23655		TRIM33_BD_e18_153.8	BD	3050	1067	1.11001
TRIM33_BD_e20_79.0	BD	315	201	1.16943		TRIM33_BD_e20_79.0	BD	450	246	0.709482
TRIM66_BD_e17_75.0	BD	1217	957	0.951729		TRIM66_BD_e17_75.0	BD	2265	845	1.04079
TRIM66_BD_e17_75.1	BD	772	609	0.948289		TRIM66_BD_e17_75.1	BD	1387	535	1.00637
TRIM66_BD_e17_75.4	BD	1166	998	0.874413		TRIM66_BD_e17_75.4	BD	1793	838	0.830777
TRIM66_BD_e18_153.17	BD	1029	1308	0.588889		TRIM66_BD_e18_153.17	BD	1466	795	0.715985
TRIM66_BD_e18_153.20	BD	1578	2464	0.479522		TRIM66_BD_e18_153.20	BD	2431	1521	0.620718
TRIM66_BD_e18_153.3	BD	2894	3021	0.717323		TRIM66_BD_e18_153.3	BD	3929	2435	0.626705
TRIM66_BD_e19_79.5	BD	973	793	0.91813		TRIM66_BD_e19_79.5	BD	1661	796	0.810203
TRIM66_BD_e19_79.6	BD	1356	1008	1.00682		TRIM66_BD_e19_79.6	BD	1995	719	1.07728
TRIM66_BD_e19_79.7	BD	1466	1124	0.976231		TRIM66_BD_e19_79.7	BD	2157	698	1.19978
TTF2_D_e10_120.6	ATPase	1121	470	1.78357		TTF2_D_e10_120.6	ATPase	1602	283	2.19599
TTF2_D_e11_151.10	ATPase	1518	119	9.49455		TTF2_D_e11_151.10	ATPase	2040	287	2.75747
TTF2_D_e12_106.0	ATPase	852	95	6.66469		TTF2_D_e12_106.0	ATPase	1356	80	6.55263
TTF2_D_e13_158.13	ATPase	1100	70	11.6452		TTF2_D_e13_158.13	ATPase	1714	60	11.0257
TTF2_D_e20_151.8	ATPase	765	14	38.8484		TTF2_D_e20_151.8	ATPase	937	18	19.7945
TTF2_D_e21_83.3	ATPase	1374	24	41.5818		TTF2_D_e21_83.3	ATPase	1977	68	11.2298
TTF2_D_e22_75.1	ATPase	1108	462	1.79336		TTF2_D_e22_75.1	ATPase	1494	250	2.31785
UTY_e25_115.1	hydroxylase	849	1163	0.546415		UTY_e25_115.1	hydroxylase	948	654	0.562759
UTY_e25_115.4	hydroxylase	2355	2908	0.6064		UTY_e25_115.4	hydroxylase	3688	2476	0.578524
UTY_e25_115.5	hydroxylase	4397	6353	0.518323		UTY_e25_115.5	hydroxylase	6908	4778	0.561591
UTY_e25_115.6	hydroxylase	1694	2479	0.511658		UTY_e25_115.6	hydroxylase	2317	1589	0.566298
UTY_e25_115.7	hydroxylase	2074	2651	0.585802		UTY_e25_115.7	hydroxylase	2594	1792	0.562195
ZMYND11_BD_e5_50.0	BD	1935	1977	0.732798		ZMYND11_BD_e5_50.0	BD	3043	1321	0.894583
ZMYND11_BD_e5_50.1	BD	1925	2202	0.654546		ZMYND11_BD_e5_50.1	BD	2811	1603	0.681038
ZMYND11_BD_e6_93.3	BD	1334	1269	0.786887		ZMYND11_BD_e6_93.3	BD	2080	824	0.980123
ZMYND11_BD_e6_93.5	BD	541	621	0.651713		ZMYND11_BD_e6_93.5	BD	785	369	0.825535
ZMYND11_BD_e7_88.0	BD	2070	3330	0.465482		ZMYND11_BD_e7_88.0	BD	3354	2051	0.635133
ZMYND11_BD_e7_88.1	BD	970	946	0.767381		ZMYND11_BD_e7_88.1	BD	1338	667	0.778802
ZMYND11_BD_e8_56.0	BD	1196	1437	0.623049		ZMYND11_BD_e8_56.0	BD	1924	1259	0.593464
ZMYND8_BD_e5_59.3	BD	917	431	1.59079		ZMYND8_BD_e5_59.3	BD	1379	225	2.37674
ZMYND8_BD_e5_59.4	BD	537	367	1.0937		ZMYND8_BD_e5_59.4	BD	651	181	1.39419
ZMYND8_BD_e6_93.0	BD	3022	1099	2.05814		ZMYND8_BD_e6_93.0	BD	4806	1112	1.67833
ZMYND8_BD_e6_93.11	BD	281	392	0.535878		ZMYND8_BD_e6_93.11	BD	559	251	0.863805
ZMYND8_BD_e6_93.6	BD	506	174	2.16875		ZMYND8_BD_e6_93.6	BD	433	102	1.64281
ZMYND8_BD_e7_88.1	BD	1038	690	1.12552		ZMYND8_BD_e7_88.1	BD	1694	497	1.32302
ZMYND8_BD_e7_88.2	BD	1748	2410	0.54308		ZMYND8_BD_e7_88.2	BD	2419	1873	0.5016
ZMYND8_BD_e7_88.6	BD	553	630	0.656664		ZMYND8_BD_e7_88.6	BD	906	428	0.821561
