# Supplementary material for: Targeted degradation of BRD9 reverses oncogenic gene expression in synovial sarcoma
Source: eLife. 2018 Nov 15;7:e41305. doi: 10.7554/eLife.41305 (PMC6277197; doi:10.7554/eLife.41305)
Supplement: Figure 1—source data 2. [file elife-41305-fig1-data2.xlsx]

## Sheet: Figure 1-source data 2
Replicate1						Replicate2
sgRNA_name	Domain class	Day3_reads	Day15_reads	Fold Change (d3/d15)		sgRNA_name	Domain class	Day3_reads	Day15_reads	Fold Change (d3/d15)
ACAT1_e7_151.0	AT	769	900	0.667749		ACAT1_e7_151.0	AT	701	734	0.865114
ACAT1_e7_151.4	AT	325	290	0.874223		ACAT1_e7_151.4	AT	299	387	0.699087
ACAT1_e7_151.6	AT	1664	1360	0.95647		ACAT1_e7_151.6	AT	1537	1542	0.903487
ACAT1_e8_96.0	AT	1292	1288	0.784133		ACAT1_e8_96.0	AT	1174	1304	0.815974
ACAT1_e8_96.1	AT	2062	1855	0.869097		ACAT1_e8_96.1	AT	1982	2075	0.865931
ACTR_e18_255.23	AT	922	750	0.960558		ACTR_e18_255.23	AT	820	1051	0.707008
ACTR_e18_255.26	AT	1126	774	1.13675		ACTR_e18_255.26	AT	938	841	1.01048
ACTR_e19_105.4	AT	1083	778	1.08773		ACTR_e19_105.4	AT	849	887	0.867217
ACTR_e20_258.1	AT	2105	1698	0.969217		ACTR_e20_258.1	AT	2005	1769	1.02743
ACTR_e20_258.22	AT	774	706	0.856569		ACTR_e20_258.22	AT	816	673	1.09819
ASH1L_BD_e18_55.0	BD	1107	841	1.02862		ASH1L_BD_e18_55.0	BD	1199	939	1.15697
ASH1L_BD_e18_55.1	BD	1139	835	1.06595		ASH1L_BD_e18_55.1	BD	1016	1127	0.816974
ASH1L_BD_e19_133.3	BD	591	480	0.961492		ASH1L_BD_e19_133.3	BD	520	513	0.917712
ASH1L_BD_e19_133.7	BD	1792	1386	1.01073		ASH1L_BD_e19_133.7	BD	1685	1464	1.04322
ASH1L_BD_e20_79.1	BD	1283	939	1.06784		ASH1L_BD_e20_79.1	BD	1220	951	1.16239
ASH1L_BD_e20_79.2	BD	1083	1437	0.589172		ASH1L_BD_e20_79.2	BD	1084	1394	0.70481
ASH1L_e11_118.0	SET	1285	1142	0.879521		ASH1L_e11_118.0	SET	1229	1310	0.850291
ASH1L_e11_118.11	SET	1487	1125	1.03315		ASH1L_e11_118.11	SET	1359	950	1.29619
ASH1L_e12_147.13	SET	2551	1985	1.00481		ASH1L_e12_147.13	SET	2522	2177	1.05025
ASH1L_e12_147.5	SET	1175	853	1.07646		ASH1L_e12_147.5	SET	1230	1043	1.06864
ASH1L_e13_109.0	SET	434	328	1.0325		ASH1L_e13_109.0	SET	369	299	1.11591
ASH1L_e13_109.1	SET	305	276	0.861923		ASH1L_e13_109.1	SET	280	332	0.762822
ATAD2_BD_e21_95.1	BD	2054	1206	1.33131		ATAD2_BD_e21_95.1	BD	1893	1304	1.31571
ATAD2_BD_e21_95.2	BD	699	715	0.763841		ATAD2_BD_e21_95.2	BD	566	622	0.824102
ATAD2_BD_e22_197.4	BD	527	268	1.53362		ATAD2_BD_e22_197.4	BD	418	693	0.54634
ATAD2_BD_e22_197.8	BD	1629	1507	0.845063		ATAD2_BD_e22_197.8	BD	1418	1457	0.882133
ATAD2_BD_e23_86.1	BD	2792	2459	0.887821		ATAD2_BD_e23_86.1	BD	2735	2725	0.909985
ATAD2_BD_e23_86.2	BD	291	256	0.88641		ATAD2_BD_e23_86.2	BD	251	307	0.739336
ATAD2B_BD_e21_95.5	BD	1074	1000	0.839405		ATAD2B_BD_e21_95.5	BD	973	919	0.959305
ATAD2B_BD_e21_95.6	BD	1053	935	0.880157		ATAD2B_BD_e21_95.6	BD	929	1143	0.736568
ATAD2B_BD_e22_160.4	BD	797	556	1.11964		ATAD2B_BD_e22_160.4	BD	628	792	0.718332
ATAD2B_BD_e22_160.8	BD	1858	1707	0.850981		ATAD2B_BD_e22_160.8	BD	1945	1914	0.921212
ATAD2B_BD_e23_86.1	BD	796	700	0.888458		ATAD2B_BD_e23_86.1	BD	862	769	1.01545
ATAD2B_BD_e23_86.2	BD	1880	1633	0.900058		ATAD2B_BD_e23_86.2	BD	1919	1830	0.950597
ATAT1_e4_50.0	AT	1340	1043	1.00416		ATAT1_e4_50.0	AT	1407	1219	1.04606
ATAT1_e5_114.0	AT	1642	1625	0.789983		ATAT1_e5_114.0	AT	1634	1713	0.864674
ATAT1_e5_114.2	AT	1138	877	1.01406		ATAT1_e5_114.2	AT	1160	1059	0.992609
ATAT1_e5_114.5	AT	585	431	1.05974		ATAT1_e5_114.5	AT	516	535	0.873269
ATAT1_e6_102.0	AT	1161	1064	0.852861		ATAT1_e6_102.0	AT	1119	1333	0.760838
ATAT1_e6_102.1	AT	1208	1001	0.943193		ATAT1_e6_102.1	AT	1195	1209	0.895785
ATAT1_e6_102.6	AT	2175	2098	0.810585		ATAT1_e6_102.6	AT	2149	2072	0.940252
ATF2_e11_150.10	AT	3268	2666	0.95852		ATF2_e11_150.10	AT	2652	2806	0.856906
ATF2_e11_150.4	AT	443	436	0.793315		ATF2_e11_150.4	AT	435	509	0.773724
ATF2_e11_150.5	AT	1355	1075	0.985194		ATF2_e11_150.5	AT	1293	1274	0.91983
ATF2_e11_150.7	AT	2089	2227	0.733453		ATF2_e11_150.7	AT	1921	2763	0.630364
ATF2_e11_150.9	AT	2421	1705	1.11014		ATF2_e11_150.9	AT	1982	1659	1.08295
ATRX_D_e18_147.2	ATPase	1177	600	1.53238		ATRX_D_e18_147.2	ATPase	944	717	1.19259
ATRX_D_e19_178.0	ATPase	989	535	1.44383		ATRX_D_e19_178.0	ATPase	920	737	1.13077
ATRX_D_e19_178.6	ATPase	912	675	1.05559		ATRX_D_e19_178.6	ATPase	878	639	1.24442
ATRX_D_e20_138.2	ATPase	1431	803	1.39254		ATRX_D_e20_138.2	ATPase	1286	800	1.45629
ATRX_H_e26_107.0	ATPase	935	562	1.29951		ATRX_H_e26_107.0	ATPase	1014	461	1.991
ATRX_H_e27_109.0	ATPase	1676	839	1.56104		ATRX_H_e27_109.0	ATPase	1528	1148	1.20622
ATRX_H_e28_178.3	ATPase	1510	1715	0.688369		ATRX_H_e28_178.3	ATPase	1327	1578	0.762258
BAZ1A_BD_e25_118.0	BD	1078	1229	0.685642		BAZ1A_BD_e25_118.0	BD	1263	1684	0.679853
BAZ1A_BD_e25_118.1	BD	714	611	0.912868		BAZ1A_BD_e25_118.1	BD	526	489	0.973778
BAZ1A_BD_e25_118.4	BD	3385	2248	1.17738		BAZ1A_BD_e25_118.4	BD	3397	2951	1.04371
BAZ1A_BD_e26_88.1	BD	963	1130	0.666122		BAZ1A_BD_e26_88.1	BD	968	1249	0.702402
BAZ1A_BD_e26_88.4	BD	1521	1481	0.802882		BAZ1A_BD_e26_88.4	BD	1573	1513	0.942361
BAZ1A_BD_e27_135.3	BD	695	580	0.936005		BAZ1A_BD_e27_135.3	BD	705	747	0.854928
BAZ1A_BD_e27_135.4	BD	1614	1464	0.861861		BAZ1A_BD_e27_135.4	BD	1414	1562	0.820548
BAZ1A_BD_e27_135.5	BD	1021	812	0.982558		BAZ1A_BD_e27_135.5	BD	1016	871	1.05685
BAZ1B_BD_e18_67.0	BD	589	540	0.851922		BAZ1B_BD_e18_67.0	BD	625	499	1.13391
BAZ1B_BD_e18_67.4	BD	1838	1067	1.34639		BAZ1B_BD_e18_67.4	BD	1657	1503	0.999285
BAZ1B_BD_e18_67.5	BD	2296	1542	1.16406		BAZ1B_BD_e18_67.5	BD	2064	1825	1.02522
BAZ1B_BD_e19_237.1	BD	2202	1493	1.15302		BAZ1B_BD_e19_237.1	BD	1877	1731	0.982941
BAZ1B_BD_e19_237.13	BD	791	440	1.40365		BAZ1B_BD_e19_237.13	BD	794	840	0.856368
BAZ1B_BD_e19_237.6	BD	353	267	1.0311		BAZ1B_BD_e19_237.6	BD	309	244	1.14431
BAZ2A_BD_e28_144.16	BD	957	558	1.3396		BAZ2A_BD_e28_144.16	BD	892	581	1.39027
BAZ2A_BD_e28_144.17	BD	1258	953	1.03166		BAZ2A_BD_e28_144.17	BD	1078	1251	0.78097
BAZ2A_BD_e28_144.19	BD	308	160	1.49837		BAZ2A_BD_e28_144.19	BD	240	167	1.29637
BAZ2A_BD_e29_135.7	BD	1221	864	1.10437		BAZ2A_BD_e29_135.7	BD	1105	883	1.13382
BAZ2A_BD_e29_135.8	BD	1283	1101	0.910831		BAZ2A_BD_e29_135.8	BD	1228	1151	0.966871
BAZ2A_BD_e29_135.9	BD	662	592	0.873513		BAZ2A_BD_e29_135.9	BD	610	589	0.937852
BAZ2B_BD_e36_144.1	BD	758	886	0.668589		BAZ2B_BD_e36_144.1	BD	734	854	0.778691
BAZ2B_BD_e36_144.2	BD	725	674	0.840391		BAZ2B_BD_e36_144.2	BD	738	718	0.931047
BAZ2B_BD_e36_144.8	BD	848	781	0.848432		BAZ2B_BD_e36_144.8	BD	784	810	0.876865
BAZ2B_BD_e37_139.0	BD	1005	915	0.858382		BAZ2B_BD_e37_139.0	BD	940	857	0.993746
BAZ2B_BD_e37_139.2	BD	284	190	1.16436		BAZ2B_BD_e37_139.2	BD	268	277	0.874628
BAZ2B_BD_e37_139.3	BD	847	696	0.950809		BAZ2B_BD_e37_139.3	BD	795	660	1.09097
BPTF_BD_e23_85.10	BD	3923	947	3.23755		BPTF_BD_e23_85.10	BD	3796	1196	2.87643
BPTF_BD_e23_85.11	BD	2091	406	4.02067		BPTF_BD_e23_85.11	BD	1954	639	2.76946
BPTF_BD_e24_187.1	BD	1648	1309	0.984158		BPTF_BD_e24_187.1	BD	1550	1458	0.963589
BPTF_BD_e24_187.3	BD	1721	1152	1.16772		BPTF_BD_e24_187.3	BD	1602	1307	1.1109
BPTF_BD_e24_187.7	BD	1355	770	1.37504		BPTF_BD_e24_187.7	BD	1381	1109	1.12848
BRD1_BD_e5_95.10	BD	1669	1432	0.911135		BRD1_BD_e5_95.10	BD	1527	1337	1.03514
BRD1_BD_e5_95.7	BD	1317	890	1.15643		BRD1_BD_e5_95.7	BD	1294	691	1.69619
BRD1_BD_e5_95.9	BD	1668	1463	0.891305		BRD1_BD_e5_95.9	BD	1520	1363	1.01076
BRD1_BD_e6_237.10	BD	610	597	0.798167		BRD1_BD_e6_237.10	BD	499	523	0.863842
BRD1_BD_e6_237.11	BD	506	465	0.849717		BRD1_BD_e6_237.11	BD	441	502	0.795314
BRD1_BD_e6_237.9	BD	1190	972	0.956837		BRD1_BD_e6_237.9	BD	893	930	0.870027
BRD2_BD1_e2_109.12	BD1	1929	1158	1.30208		BRD2_BD1_e2_109.12	BD1	1901	1034	1.66598
BRD2_BD1_e2_109.3	BD1	1535	1008	1.19019		BRD2_BD1_e2_109.3	BD1	1379	1015	1.23111
BRD2_BD1_e2_109.4	BD1	1218	640	1.48677		BRD2_BD1_e2_109.4	BD1	1081	702	1.39481
BRD2_BD1_e3_138.2	BD1	527	258	1.59288		BRD2_BD1_e3_138.2	BD1	526	465	1.02394
BRD2_BD1_e3_138.3	BD1	1523	921	1.29234		BRD2_BD1_e3_138.3	BD1	1463	797	1.66295
BRD2_BD1_e3_138.8	BD1	2743	1617	1.32621		BRD2_BD1_e3_138.8	BD1	2733	1596	1.5522
BRD2_BD1_e4_60.1	BD1	630	371	1.32544		BRD2_BD1_e4_60.1	BD1	595	305	1.76407
BRD2_BD1_e4_60.3	BD1	1554	1048	1.15897		BRD2_BD1_e4_60.3	BD1	1618	827	1.77249
BRD2_BD2_e6_145.6	BD2	1784	1234	1.13009		BRD2_BD2_e6_145.6	BD2	1747	1151	1.37551
BRD2_BD2_e6_145.7	BD2	1427	1017	1.09667		BRD2_BD2_e6_145.7	BD2	1340	806	1.50615
BRD2_BD2_e7_129.0	BD2	809	663	0.9533		BRD2_BD2_e7_129.0	BD2	947	759	1.13026
BRD2_BD2_e7_129.6	BD2	777	633	0.958932		BRD2_BD2_e7_129.6	BD2	802	748	0.971257
BRD2_BD2_e7_129.7	BD2	1639	1194	1.07299		BRD2_BD2_e7_129.7	BD2	1649	1061	1.40839
BRD3_BD1_e2_112.5	BD1	3323	2521	1.03069		BRD3_BD1_e2_112.5	BD1	3057	2631	1.05345
BRD3_BD1_e2_112.6	BD1	1872	1287	1.13703		BRD3_BD1_e2_112.6	BD1	1632	1273	1.1619
BRD3_BD1_e2_112.7	BD1	1379	875	1.23161		BRD3_BD1_e2_112.7	BD1	1351	996	1.2291
BRD3_BD1_e3_138.5	BD1	589	444	1.0358		BRD3_BD1_e3_138.5	BD1	525	721	0.659578
BRD3_BD1_e3_138.7	BD1	3170	2240	1.10654		BRD3_BD1_e3_138.7	BD1	2910	2817	0.9366
BRD3_BD1_e3_138.8	BD1	3172	2596	0.955442		BRD3_BD1_e3_138.8	BD1	3123	2852	0.992824
BRD3_BD1_e4_66.0	BD1	748	560	1.04331		BRD3_BD1_e4_66.0	BD1	677	660	0.929044
BRD3_BD1_e4_66.4	BD1	1762	1422	0.968666		BRD3_BD1_e4_66.4	BD1	1691	1335	1.14804
BRD3_BD1_e4_66.5	BD1	895	498	1.40352		BRD3_BD1_e4_66.5	BD1	886	513	1.56364
BRD3_BD2_e6_145.5	BD2	1545	1368	0.882878		BRD3_BD2_e6_145.5	BD2	1681	1563	0.974865
BRD3_BD2_e7_129.0	BD2	1045	822	0.993432		BRD3_BD2_e7_129.0	BD2	924	1058	0.791411
BRD3_BD2_e7_129.3	BD2	1612	1561	0.80733		BRD3_BD2_e7_129.3	BD2	1724	1631	0.958141
BRD3_BD2_e7_129.8	BD2	748	780	0.749339		BRD3_BD2_e7_129.8	BD2	682	668	0.924712
BRD4_BD1_e2_121.1	BD1	1397	97	11.1749		BRD4_BD1_e2_121.1	BD1	1135	143	7.15322
BRD4_BD1_e2_121.4	BD1	1937	249	6.06562		BRD4_BD1_e2_121.4	BD1	1806	282	5.78978
BRD4_BD1_e2_121.9	BD1	1543	166	7.23641		BRD4_BD1_e2_121.9	BD1	1415	239	5.34935
BRD4_BD1_e3_138.0	BD1	764	30	19.4134		BRD4_BD1_e3_138.0	BD1	586	48	10.8671
BRD4_BD1_e3_138.2	BD1	1160	93	9.67485		BRD4_BD1_e3_138.2	BD1	1128	44	22.7815
BRD4_BD1_e3_138.3	BD1	401	16	18.6897		BRD4_BD1_e3_138.3	BD1	362	23	13.7332
BRD4_BD1_e4_68.0	BD1	777	79	7.61767		BRD4_BD1_e4_68.0	BD1	716	31	20.3524
BRD4_BD1_e4_68.1	BD1	218	3	45.0839		BRD4_BD1_e4_68.1	BD1	189	12	13.2808
BRD4_BD1_e4_68.2	BD1	1167	69	13.0808		BRD4_BD1_e4_68.2	BD1	1103	66	14.9517
BRD4_BD2_e6_148.11	BD2	1804	385	3.65764		BRD4_BD2_e6_148.11	BD2	1792	373	4.34673
BRD4_BD2_e7_130.0	BD2	354	93	2.9525		BRD4_BD2_e7_130.0	BD2	378	118	2.88318
BRD4_BD2_e7_130.13	BD2	1374	588	1.82532		BRD4_BD2_e7_130.13	BD2	1404	520	2.44453
BRD4_BD2_e7_130.14	BD2	1048	305	2.68075		BRD4_BD2_e7_130.14	BD2	902	349	2.33799
BRD8_BD_e17_77.2	BD	933	657	1.10945		BRD8_BD_e17_77.2	BD	897	721	1.12694
BRD8_BD_e18_69.0	BD	247	216	0.89121		BRD8_BD_e18_69.0	BD	282	228	1.11732
BRD8_BD_e18_69.2	BD	2084	1825	0.892803		BRD8_BD_e18_69.2	BD	1946	2414	0.730853
BRD8_BD_e18_69.3	BD	1450	1117	1.01465		BRD8_BD_e18_69.3	BD	1330	1438	0.838314
BRD8_BD_e19_178.3	BD	945	744	0.992451		BRD8_BD_e19_178.3	BD	965	928	0.942199
BRD8_BD_e19_178.4	BD	1644	1121	1.1463		BRD8_BD_e19_178.4	BD	1417	1383	0.928647
BRD9_BD_e5_145.1	BD	502	542	0.723411		BRD9_BD_e5_145.1	BD	515	476	0.979403
BRD9_BD_e5_145.7	BD	2348	2469	0.743612		BRD9_BD_e5_145.7	BD	2384	2367	0.913123
BRD9_BD_e5_145.9	BD	753	917	0.641744		BRD9_BD_e5_145.9	BD	804	899	0.810301
BRD9_BD_e6_111.2	BD	793	509	1.21673		BRD9_BD_e6_111.2	BD	736	493	1.35151
BRD9_BD_e6_111.4	BD	1322	1604	0.64435		BRD9_BD_e6_111.4	BD	1181	1631	0.65636
BRD9_BD_e6_111.5	BD	549	468	0.916026		BRD9_BD_e6_111.5	BD	530	488	0.98319
BRDT_BD1_e2_121.3	BD1	2552	1922	1.03814		BRDT_BD1_e2_121.3	BD1	2397	2074	1.04775
BRDT_BD1_e2_121.5	BD1	719	642	0.874927		BRDT_BD1_e2_121.5	BD1	681	614	1.00444
BRDT_BD1_e2_121.6	BD1	1310	970	1.0555		BRDT_BD1_e2_121.6	BD1	1316	1095	1.08911
BRDT_BD1_e3_138.1	BD1	341	312	0.852745		BRDT_BD1_e3_138.1	BD1	320	401	0.722125
BRDT_BD1_e3_138.2	BD1	393	187	1.63699		BRDT_BD1_e3_138.2	BD1	303	276	0.992422
BRDT_BD1_e4_68.0	BD1	1250	925	1.05611		BRDT_BD1_e4_68.0	BD1	1249	1156	0.979156
BRDT_BD1_e4_68.1	BD1	1283	844	1.18792		BRDT_BD1_e4_68.1	BD1	1034	931	1.00632
BRDT_BD2_e6_150.1	BD2	1068	1081	0.772215		BRDT_BD2_e6_150.1	BD2	1092	1230	0.80461
BRDT_BD2_e6_150.6	BD2	1494	1031	1.13258		BRDT_BD2_e6_150.6	BD2	1275	1227	0.941743
BRDT_BD2_e6_150.7	BD2	443	460	0.751995		BRDT_BD2_e6_150.7	BD2	443	449	0.893036
BRDT_BD2_e7_129.2	BD2	740	507	1.13988		BRDT_BD2_e7_129.2	BD2	772	639	1.09418
BRDT_BD2_e7_129.3	BD2	673	481	1.09262		BRDT_BD2_e7_129.3	BD2	641	546	1.063
BRDT_BD2_e7_129.4	BD2	664	348	1.48909		BRDT_BD2_e7_129.4	BD2	539	361	1.35076
BRPF1_BD_e6_118.11	BD	785	876	0.700301		BRPF1_BD_e6_118.11	BD	854	697	1.10981
BRPF1_BD_e6_118.12	BD	1324	1138	0.909398		BRPF1_BD_e6_118.12	BD	1325	1065	1.12742
BRPF1_BD_e6_118.5	BD	1823	1456	0.978811		BRPF1_BD_e6_118.5	BD	1771	1522	1.05471
BRPF1_BD_e7_237.10	BD	1091	1033	0.825472		BRPF1_BD_e7_237.10	BD	1025	844	1.10028
BRPF1_BD_e7_237.5	BD	619	535	0.903668		BRPF1_BD_e7_237.5	BD	652	496	1.19004
BRPF1_BD_e7_237.9	BD	731	504	1.13271		BRPF1_BD_e7_237.9	BD	823	622	1.1983
BRPF3_BD_e5_95.0	BD	1782	1537	0.906399		BRPF3_BD_e5_95.0	BD	1469	1541	0.864075
BRPF3_BD_e5_95.3	BD	396	358	0.863319		BRPF3_BD_e5_95.3	BD	402	396	0.918597
BRPF3_BD_e6_190.23	BD	622	572	0.849391		BRPF3_BD_e6_190.23	BD	559	579	0.874261
BRPF3_BD_e6_190.25	BD	702	564	0.972216		BRPF3_BD_e6_190.25	BD	559	708	0.715172
BRPF3_BD_e6_190.4	BD	2703	2120	0.996912		BRPF3_BD_e6_190.4	BD	2460	2396	0.930833
BRWD1_BD1_e30_74.0	BD1	756	908	0.650682		BRWD1_BD1_e30_74.0	BD1	884	1015	0.789198
BRWD1_BD1_e31_121.0	BD1	1527	1761	0.677944		BRWD1_BD1_e31_121.0	BD1	1479	1792	0.748166
BRWD1_BD1_e31_121.1	BD1	463	497	0.727526		BRWD1_BD1_e31_121.1	BD1	467	477	0.88626
BRWD1_BD1_e31_121.3	BD1	869	700	0.969937		BRWD1_BD1_e31_121.3	BD1	814	1052	0.701168
BRWD1_BD1_e32_126.0	BD1	3013	3248	0.725413		BRWD1_BD1_e32_126.0	BD1	2550	3626	0.637663
BRWD1_BD1_e32_126.1	BD1	1431	1663	0.672744		BRWD1_BD1_e32_126.1	BD1	1326	1346	0.892881
BRWD1_BD1_e32_126.2	BD1	1275	1470	0.678061		BRWD1_BD1_e32_126.2	BD1	1152	1339	0.779768
BRWD1_BD2_e35_98.1	BD2	997	1096	0.71102		BRWD1_BD2_e35_98.1	BD2	816	1293	0.571972
BRWD1_BD2_e35_98.2	BD2	1200	1203	0.779723		BRWD1_BD2_e35_98.2	BD2	1105	1300	0.770378
BRWD1_BD2_e35_98.3	BD2	1381	1628	0.663189		BRWD1_BD2_e35_98.3	BD2	1294	1659	0.707031
BRWD1_BD2_e36_153.0	BD2	1341	1540	0.68076		BRWD1_BD2_e36_153.0	BD2	1305	1769	0.668725
BRWD1_BD2_e36_153.1	BD2	2160	2228	0.758041		BRWD1_BD2_e36_153.1	BD2	2115	2524	0.759719
BRWD1_BD2_e36_153.5	BD2	1005	964	0.814786		BRWD1_BD2_e36_153.5	BD2	864	993	0.788417
BRWD3_BD_e30_95.10	BD1	1470	1307	0.879202		BRWD3_BD_e30_95.10	BD1	1387	1280	0.98208
BRWD3_BD_e30_95.8	BD1	488	406	0.93835		BRWD3_BD_e30_95.8	BD1	432	506	0.772936
BRWD3_BD_e30_95.9	BD1	1499	1248	0.938905		BRWD3_BD_e30_95.9	BD1	1385	1576	0.796584
BRWD3_BD_e31_121.1	BD1	1745	1778	0.767325		BRWD3_BD_e31_121.1	BD1	1729	1806	0.867855
BRWD3_BD_e31_121.3	BD1	2354	2204	0.835117		BRWD3_BD_e31_121.3	BD1	2469	2466	0.907729
BRWD3_BD_e31_121.4	BD1	2747	2465	0.871386		BRWD3_BD_e31_121.4	BD1	2379	2923	0.737936
BRWD3_BD_e32_126.2	BD1	275	396	0.54211		BRWD3_BD_e32_126.2	BD1	273	253	0.97516
BRWD3_BD_e32_126.3	BD1	2856	3007	0.742709		BRWD3_BD_e32_126.3	BD1	2505	3247	0.699507
BRWD3_BD_e32_126.5	BD1	1385	1261	0.858563		BRWD3_BD_e32_126.5	BD1	1233	1374	0.81335
BRWD3_BD2_e35_105.1	BD2	1037	1076	0.753282		BRWD3_BD2_e35_105.1	BD2	992	1074	0.837006
BRWD3_BD2_e35_105.4	BD2	544	570	0.745479		BRWD3_BD2_e35_105.4	BD2	584	575	0.919704
BRWD3_BD2_e35_105.5	BD2	1994	2276	0.685031		BRWD3_BD2_e35_105.5	BD2	1894	1941	0.884585
BRWD3_BD2_e36_75.0	BD2	1421	1363	0.814997		BRWD3_BD2_e36_75.0	BD2	1388	1641	0.766706
BRWD3_BD2_e37_153.0	BD2	2270	1956	0.907382		BRWD3_BD2_e37_153.0	BD2	1994	2250	0.803444
BRWD3_BD2_e37_153.10	BD2	1384	1435	0.75397		BRWD3_BD2_e37_153.10	BD2	1340	1481	0.820109
BRWD3_BD2_e37_153.4	BD2	506	630	0.627448		BRWD3_BD2_e37_153.4	BD2	498	529	0.852349
BRWD3_BD2_e38_95.0	BD2	1741	1478	0.920876		BRWD3_BD2_e38_95.0	BD2	1517	1754	0.784006
CARM1_e5_111.13	RMT	417	389	0.836798		CARM1_e5_111.13	RMT	381	367	0.939236
CARM1_e5_111.6	RMT	1039	458	1.7714		CARM1_e5_111.6	RMT	939	540	1.57446
CARM1_e5_111.7	RMT	774	313	1.92939		CARM1_e5_111.7	RMT	618	360	1.55303
CARM1_e6_178.1	RMT	1023	613	1.30367		CARM1_e6_178.1	RMT	1056	526	1.81768
CARM1_e6_178.13	RMT	304	199	1.19021		CARM1_e6_178.13	RMT	254	122	1.87433
CARM1_e6_178.25	RMT	902	466	1.51147		CARM1_e6_178.25	RMT	726	433	1.5175
CDK1_e3.1	positive_control	2582	245	8.21699		CDK1_e3.1	positive_control	2427	311	7.0572
CDK1_e4.1	positive_control	1666	164	7.90809		CDK1_e4.1	positive_control	1489	200	6.72183
CDK1_e5.1	positive_control	489	12	29.9234		CDK1_e5.1	positive_control	410	11	31.2299
CDK1_e6.1	positive_control	1749	33	40.4957		CDK1_e6.1	positive_control	1780	27	57.8489
CDK1_e7.1	positive_control	1221	73	12.9441		CDK1_e7.1	positive_control	1092	50	19.4551
CDK9_e2.1	positive_control	873	39	17.1645		CDK9_e2.1	positive_control	716	86	7.47216
CDK9_e3.1	positive_control	1815	57	24.5691		CDK9_e3.1	positive_control	1598	76	18.8451
CDK9_e4.1	positive_control	1986	677	2.2919		CDK9_e4.1	positive_control	1867	536	3.15379
CDK9_e4.2	positive_control	1294	19	51.1643		CDK9_e4.2	positive_control	1039	31	29.5337
CDK9_e5.1	positive_control	1262	38	25.4527		CDK9_e5.1	positive_control	1225	12	86.0795
CDK9_e5.2	positive_control	1255	105	9.27979		CDK9_e5.2	positive_control	1194	131	8.20965
CECR2_BD_e12_92.0	BD	1016	681	1.16561		CECR2_BD_e12_92.0	BD	813	724	1.01718
CECR2_BD_e12_92.1	BD	764	511	1.16766		CECR2_BD_e12_92.1	BD	780	453	1.55853
CECR2_BD_e12_92.7	BD	1344	734	1.4307		CECR2_BD_e12_92.7	BD	1360	970	1.27043
CECR2_BD_e13_127.3	BD	1540	860	1.39938		CECR2_BD_e13_127.3	BD	1327	830	1.44846
CECR2_BD_e13_127.7	BD	1469	953	1.2047		CECR2_BD_e13_127.7	BD	1287	1255	0.929413
CECR2_BD_e13_127.9	BD	1836	1047	1.37059		CECR2_BD_e13_127.9	BD	1830	1289	1.28671
CECR2_BD_e14_59.0	BD	1603	1001	1.2516		CECR2_BD_e14_59.0	BD	1676	1222	1.24299
CECR2_BD_e14_59.2	BD	776	417	1.45284		CECR2_BD_e14_59.2	BD	659	342	1.743
CECR2_BD_e14_59.3	BD	1028	1276	0.629772		CECR2_BD_e14_59.3	BD	979	1081	0.820693
CHD1_D_e11_210.0	ATPase	811	774	0.818744		CHD1_D_e11_210.0	ATPase	716	775	0.836934
CHD1_D_e12_90.0	ATPase	1321	1025	1.00729		CHD1_D_e12_90.0	ATPase	1304	1008	1.17223
CHD1_D_e13_135.3	ATPase	854	832	0.802109		CHD1_D_e13_135.3	ATPase	836	772	0.980995
CHD1_H_e17_72.2	ATPase	1700	1724	0.770941		CHD1_H_e17_72.2	ATPase	1717	2239	0.695229
CHD1_H_e18_150.7	ATPase	1652	1073	1.20337		CHD1_H_e18_150.7	ATPase	1451	1083	1.21412
CHD1_H_e18_150.8	ATPase	1786	1616	0.864046		CHD1_H_e18_150.8	ATPase	1764	1415	1.12993
CHD1L_D_e4_115.1	ATPase	552	491	0.877957		CHD1L_D_e4_115.1	ATPase	606	467	1.17463
CHD1L_D_e4_115.7	ATPase	1453	1245	0.912284		CHD1L_D_e4_115.7	ATPase	1170	1219	0.869855
CHD1L_D_e6_82.1	ATPase	1725	1239	1.0883		CHD1L_D_e6_82.1	ATPase	1415	1277	1.00426
CHD1L_H_e10_50.2	ATPase	846	568	1.16341		CHD1L_H_e10_50.2	ATPase	870	849	0.928401
CHD1L_H_e11_74.2	ATPase	1418	947	1.17024		CHD1L_H_e11_74.2	ATPase	1248	1092	1.03566
CHD1L_H_e12_111.0	ATPase	412	465	0.691865		CHD1L_H_e12_111.0	ATPase	398	509	0.707913
CHD1L_H_e13_115.2	ATPase	2032	1376	1.15442		CHD1L_H_e13_115.2	ATPase	1752	1256	1.26421
CHD2_D_e14_210.7	ATPase	1001	749	1.04425		CHD2_D_e14_210.7	ATPase	857	822	0.944535
CHD2_D_e15_90.0	ATPase	2389	2632	0.709754		CHD2_D_e15_90.0	ATPase	2180	2782	0.71047
CHD2_D_e16_135.13	ATPase	789	651	0.94685		CHD2_D_e16_135.13	ATPase	653	867	0.682382
CHD2_H_e19_153.1	ATPase	685	575	0.930549		CHD2_H_e19_153.1	ATPase	667	812	0.744171
CHD2_H_e20_72.0	ATPase	1157	942	0.959906		CHD2_H_e20_72.0	ATPase	1127	1094	0.933543
CHD2_H_e21_150.10	ATPase	1058	650	1.27162		CHD2_H_e21_150.10	ATPase	1017	1049	0.878533
CHD3_D_e14_79.5	ATPase	1827	1434	0.996		CHD3_D_e14_79.5	ATPase	1480	1473	0.910709
CHD3_D_e15_201.10	ATPase	754	691	0.852528		CHD3_D_e15_201.10	ATPase	798	668	1.08199
CHD3_D_e16_138.12	ATPase	469	507	0.722441		CHD3_D_e16_138.12	ATPase	376	364	0.93453
CHD3_D_e17_63.0	ATPase	1523	1677	0.710021		CHD3_D_e17_63.0	ATPase	1301	1502	0.785114
CHD3_H_e20_86.3	ATPase	987	883	0.873532		CHD3_H_e20_86.3	ATPase	972	1062	0.82939
CHD3_H_e21_118.4	ATPase	1253	1230	0.7963		CHD3_H_e21_118.4	ATPase	1231	1418	0.78685
CHD3_H_e22_125.0	ATPase	492	590	0.651395		CHD3_H_e22_125.0	ATPase	446	521	0.77505
CHD3_H_e23_50.0	ATPase	871	711	0.957145		CHD3_H_e23_50.0	ATPase	770	974	0.716334
CHD4_D_e16_201.15	ATPase	359	33	8.31215		CHD4_D_e16_201.15	ATPase	303	9	27.739
CHD4_D_e17_138.8	ATPase	835	163	3.98774		CHD4_D_e17_138.8	ATPase	589	255	2.08747
CHD4_D_e18_55.3	ATPase	1588	251	4.93324		CHD4_D_e18_55.3	ATPase	1536	168	8.24767
CHD4_H_e22_118.4	ATPase	753	85	6.86601		CHD4_H_e22_118.4	ATPase	666	66	9.02798
CHD4_H_e23_125.1	ATPase	390	17	17.1548		CHD4_H_e23_125.1	ATPase	345	55	5.59682
CHD4_H_e24_50.1	ATPase	625	32	14.9124		CHD4_H_e24_50.1	ATPase	738	21	30.5536
CHD5_D_e15_201.32	ATPase	762	881	0.675928		CHD5_D_e15_201.32	ATPase	719	918	0.709651
CHD5_D_e16_138.10	ATPase	391	307	0.993665		CHD5_D_e16_138.10	ATPase	313	291	0.972496
CHD5_D_e17_59.0	ATPase	1456	1305	0.872162		CHD5_D_e17_59.0	ATPase	1271	1268	0.908455
CHD5_H_e20_95.3	ATPase	345	354	0.760614		CHD5_H_e20_95.3	ATPase	319	444	0.650293
CHD5_H_e21_118.17	ATPase	1368	1214	0.880835		CHD5_H_e21_118.17	ATPase	1285	1177	0.989418
CHD5_H_e22_125.10	ATPase	1099	1053	0.815743		CHD5_H_e22_125.10	ATPase	993	1069	0.841765
CHD5_H_e23_50.4	ATPase	2144	1798	0.932294		CHD5_H_e23_50.4	ATPase	2033	1894	0.973055
CHD6_D_e12_244.11	ATPase	1280	994	1.00644		CHD6_D_e12_244.11	ATPase	1171	880	1.20563
CHD6_D_e13_177.11	ATPase	884	786	0.878829		CHD6_D_e13_177.11	ATPase	839	878	0.865779
CHD6_H_e16_105.4	ATPase	634	594	0.833754		CHD6_H_e16_105.4	ATPase	514	491	0.947694
CHD6_H_e17_196.20	ATPase	732	481	1.18841		CHD6_H_e17_196.20	ATPase	672	532	1.14368
CHD6_H_e18_47.3	ATPase	2214	1827	0.947458		CHD6_H_e18_47.3	ATPase	2098	1975	0.963001
CHD7_D_e16_118.9	ATPase	1571	1313	0.935319		CHD7_D_e16_118.9	ATPase	1523	1524	0.905825
CHD7_D_e17_196.1	ATPase	1539	1594	0.754821		CHD7_D_e17_196.1	ATPase	1456	1944	0.67897
CHD7_H_e12_244.14	ATPase	2390	2098	0.890712		CHD7_H_e12_244.14	ATPase	2235	2491	0.813455
CHD7_H_e13_177.11	ATPase	312	268	0.907948		CHD7_H_e13_177.11	ATPase	244	413	0.534657
CHD8_D_e12_244.18	ATPase	2268	1144	1.54963		CHD8_D_e12_244.18	ATPase	2052	972	1.91291
CHD8_D_e13_177.7	ATPase	310	301	0.80348		CHD8_D_e13_177.7	ATPase	368	207	1.60534
CHD8_H_e16_135.0	ATPase	1101	522	1.6473		CHD8_H_e16_135.0	ATPase	909	468	1.75819
CHD8_H_e17_196.3	ATPase	1576	794	1.55101		CHD8_H_e17_196.3	ATPase	1322	724	1.65401
CHD8_H_e18_52.3	ATPase	1062	942	0.881089		CHD8_H_e18_52.3	ATPase	1008	779	1.17221
CHD9_D_e12_244.8	ATPase	1728	1767	0.764578		CHD9_D_e12_244.8	ATPase	1682	2146	0.71056
CHD9_D_e13_177.3	ATPase	1016	1231	0.645159		CHD9_D_e13_177.3	ATPase	1009	1341	0.681956
CHD9_H_e16_135.3	ATPase	2205	2038	0.84595		CHD9_H_e16_135.3	ATPase	1866	1898	0.891242
CHD9_H_e17_196.11	ATPase	624	712	0.684754		CHD9_H_e17_196.11	ATPase	692	796	0.787565
CHD9_H_e18_50.2	ATPase	1282	1218	0.822752		CHD9_H_e18_50.2	ATPase	1128	1060	0.964316
CLOCK_e21_210.10	AT	1551	1223	0.991321		CLOCK_e21_210.10	AT	1476	1608	0.832038
CLOCK_e21_210.12	AT	739	659	0.876094		CLOCK_e21_210.12	AT	731	894	0.740845
CLOCK_e21_210.3	AT	2234	1938	0.901282		CLOCK_e21_210.3	AT	2198	2583	0.771505
CLOCK_e22_203.13	AT	920	751	0.9572		CLOCK_e22_203.13	AT	870	946	0.833297
CLOCK_e22_203.2	AT	1922	1799	0.835296		CLOCK_e22_203.2	AT	1854	1738	0.966988
CLOCK_e22_203.5	AT	1378	1521	0.708278		CLOCK_e22_203.5	AT	1274	1707	0.676539
CLOCK_e23_256.10	AT	461	484	0.743808		CLOCK_e23_256.10	AT	610	764	0.723284
CLOCK_e23_256.17	AT	663	417	1.24128		CLOCK_e23_256.17	AT	565	650	0.787258
CLOCK_e23_256.6	AT	946	978	0.755983		CLOCK_e23_256.6	AT	1136	1002	1.02732
CREBBP_BD_e17_107.0	BD	667	648	0.804144		CREBBP_BD_e17_107.0	BD	630	1067	0.535051
CREBBP_BD_e17_107.5	BD	673	634	0.829272		CREBBP_BD_e17_107.5	BD	657	441	1.34841
CREBBP_BD_e17_107.6	BD	739	858	0.673082		CREBBP_BD_e17_107.6	BD	638	919	0.62902
CREBBP_BD_e18_210.14	BD	3299	3554	0.725899		CREBBP_BD_e18_210.14	BD	2911	4330	0.609609
CREBBP_BD_e18_210.15	BD	1989	2056	0.756403		CREBBP_BD_e18_210.15	BD	1774	2491	0.645668
CREBBP_BD_e18_210.7	BD	524	493	0.830047		CREBBP_BD_e18_210.7	BD	498	638	0.706935
CREBBP_e25_147.2	AT	1315	1316	0.781121		CREBBP_e25_147.2	AT	1336	1674	0.723442
CREBBP_e25_147.7	AT	865	883	0.765557		CREBBP_e25_147.7	AT	797	1061	0.680706
CREBBP_e25_147.8	AT	1920	1945	0.771816		CREBBP_e25_147.8	AT	2033	2613	0.705399
CREBBP_e26_114.7	AT	1373	1751	0.613052		CREBBP_e26_114.7	AT	1410	2276	0.561645
CREBBP_e26_114.8	AT	549	698	0.614522		CREBBP_e26_114.8	AT	649	733	0.802032
CREBBP_e26_114.9	AT	1490	1553	0.750072		CREBBP_e26_114.9	AT	1197	2218	0.489264
CREBBP_e27_166.2	AT	579	611	0.740267		CREBBP_e27_166.2	AT	525	741	0.641797
CREBBP_e27_166.7	AT	2523	2999	0.657861		CREBBP_e27_166.7	AT	2408	4008	0.544776
CREBBP_e27_166.8	AT	1745	1913	0.713197		CREBBP_e27_166.8	AT	1573	1992	0.715862
CREBBP_e28_168.12	AT	2192	2257	0.759391		CREBBP_e28_168.12	AT	2139	2960	0.6552
CREBBP_e28_168.2	AT	2292	2873	0.623832		CREBBP_e28_168.2	AT	2058	3238	0.576281
CREBBP_e28_168.9	AT	1239	1181	0.820051		CREBBP_e28_168.9	AT	1176	1446	0.737148
CREBBP_e29_162.10	AT	434	477	0.710504		CREBBP_e29_162.10	AT	485	773	0.568383
CREBBP_e29_162.7	AT	2461	2382	0.807856		CREBBP_e29_162.7	AT	2375	2781	0.774299
CREBBP_e29_162.8	AT	1736	1604	0.846136		CREBBP_e29_162.8	AT	1669	1975	0.766086
DOT1L_e6_95.2	SET	994	649	1.19653		DOT1L_e6_95.2	SET	718	523	1.24296
DOT1L_e6_95.3	SET	1980	1567	0.987839		DOT1L_e6_95.3	SET	2061	1674	1.11603
DOT1L_e6_95.7	SET	957	713	1.0487		DOT1L_e6_95.7	SET	820	638	1.16403
DOT1L_e7_63.0	SET	1102	613	1.40435		DOT1L_e7_63.0	SET	1110	783	1.28424
DOT1L_e7_63.3	SET	2406	1763	1.06698		DOT1L_e7_63.3	SET	2408	1665	1.31097
DOT1L_e7_63.4	SET	1207	1012	0.932176		DOT1L_e7_63.4	SET	1117	1050	0.963999
DOT1L_e8_56.0	SET	688	558	0.963058		DOT1L_e8_56.0	SET	713	589	1.09621
DOT1L_e8_56.1	SET	727	464	1.22347		DOT1L_e8_56.1	SET	658	411	1.44882
DOT1L_e8_56.3	SET	2874	2241	1.00277		DOT1L_e8_56.3	SET	2541	1685	1.36697
DOT1L_e9_80.5	SET	1048	904	0.905991		DOT1L_e9_80.5	SET	1035	765	1.22561
DOT1L_e9_80.7	SET	1276	831	1.19991		DOT1L_e9_80.7	SET	1203	855	1.27476
DOT1L_e9_80.8	SET	1750	1151	1.18843		DOT1L_e9_80.8	SET	1753	1180	1.34634
EHMT1_e24_87.1	SET	530	325	1.27249		EHMT1_e24_87.1	SET	516	401	1.16443
EHMT1_e24_87.2	SET	2499	1292	1.51199		EHMT1_e24_87.2	SET	2318	1424	1.47542
EHMT1_e24_87.3	SET	1137	498	1.78302		EHMT1_e24_87.3	SET	1075	626	1.55522
EHMT1_e25_79.0	SET	422	412	0.799647		EHMT1_e25_79.0	SET	460	342	1.21666
EHMT1_e25_79.1	SET	867	391	1.73094		EHMT1_e25_79.1	SET	731	502	1.31831
EHMT1_e26_176.0	SET	756	571	1.03418		EHMT1_e26_176.0	SET	747	658	1.02822
EHMT1_e26_176.1	SET	1640	899	1.42565		EHMT1_e26_176.1	SET	1353	1008	1.21628
EHMT1_e26_176.2	SET	789	364	1.6918		EHMT1_e26_176.2	SET	746	377	1.79037
EHMT2_e23_87.1	SET	669	262	1.9913		EHMT2_e23_87.1	SET	589	384	1.38787
EHMT2_e23_87.10	SET	2201	1014	1.6965		EHMT2_e23_87.10	SET	2097	1156	1.64395
EHMT2_e23_87.11	SET	2382	928	2.00602		EHMT2_e23_87.11	SET	2145	985	1.97324
EHMT2_e24_79.0	SET	754	384	1.53272		EHMT2_e24_79.0	SET	653	526	1.124
EHMT2_e25_176.13	SET	635	261	1.89732		EHMT2_e25_176.13	SET	546	396	1.24765
EHMT2_e25_176.4	SET	1220	673	1.41627		EHMT2_e25_176.4	SET	1273	874	1.31964
EHMT2_e25_176.5	SET	1511	755	1.56378		EHMT2_e25_176.5	SET	1271	901	1.27812
ELP3_e13_81.0	AT	2425	488	3.88064		ELP3_e13_81.0	AT	2369	533	4.02427
ELP3_e13_81.1	AT	1492	212	5.48454		ELP3_e13_81.1	AT	1321	289	4.13268
ELP3_e13_81.8	AT	829	128	5.03507		ELP3_e13_81.8	AT	665	115	5.20355
ELP3_e14_82.0	AT	1918	277	5.40071		ELP3_e14_82.0	AT	1839	337	4.93597
ELP3_e14_82.4	AT	421	129	2.53731		ELP3_e14_82.4	AT	410	90	4.09048
ELP3_e15_58.1	AT	1574	267	4.59759		ELP3_e15_58.1	AT	1444	177	7.36143
ELP3_e15_58.2	AT	1165	251	3.61916		ELP3_e15_58.2	AT	1169	245	4.31153
EP300_BD_e17_111.2	BD	1763	1434	0.96111		EP300_BD_e17_111.2	BD	1608	1964	0.742219
EP300_BD_e17_111.6	BD	546	481	0.886439		EP300_BD_e17_111.6	BD	462	456	0.917069
EP300_BD_e17_111.7	BD	911	627	1.13505		EP300_BD_e17_111.7	BD	820	898	0.827345
EP300_BD_e18_196.14	BD	995	895	0.868815		EP300_BD_e18_196.14	BD	1002	1152	0.788245
EP300_BD_e18_196.15	BD	2114	1586	1.04206		EP300_BD_e18_196.15	BD	1926	1985	0.8796
EP300_BD_e18_196.5	BD	2056	1815	0.885658		EP300_BD_e18_196.5	BD	1904	1914	0.901793
EP300_e25_147.10	AT	969	1046	0.724059		EP300_e25_147.10	AT	1138	1148	0.898349
EP300_e25_147.11	AT	1175	984	0.933264		EP300_e25_147.11	AT	1049	1388	0.684999
EP300_e25_147.3	AT	969	917	0.82583		EP300_e25_147.3	AT	1031	1189	0.785839
EP300_e26_114.0	AT	1986	1446	1.0737		EP300_e26_114.0	AT	1914	1942	0.893465
EP300_e26_114.5	AT	1989	1397	1.11302		EP300_e26_114.5	AT	1798	2068	0.7882
EP300_e26_114.6	AT	1163	1028	0.884226		EP300_e26_114.6	AT	1196	1300	0.833821
EP300_e27_166.3	AT	566	436	1.01358		EP300_e27_166.3	AT	499	684	0.66078
EP300_e27_166.6	AT	2132	1404	1.18709		EP300_e27_166.6	AT	1788	1810	0.895487
EP300_e27_166.7	AT	1137	704	1.26186		EP300_e27_166.7	AT	951	924	0.932546
EP300_e28_165.12	AT	1457	1039	1.09603		EP300_e28_165.12	AT	1414	1399	0.91609
EP300_e28_165.2	AT	552	322	1.33763		EP300_e28_165.2	AT	508	432	1.06428
EP300_e28_165.4	AT	2239	1519	1.15234		EP300_e28_165.4	AT	1843	2211	0.755694
EP300_e29_162.10	AT	1008	739	1.06577		EP300_e29_162.10	AT	981	1138	0.781211
EP300_e29_162.8	AT	2190	1847	0.927043		EP300_e29_162.8	AT	2002	2254	0.805236
EP300_e29_162.9	AT	1952	1191	1.28112		EP300_e29_162.9	AT	1712	1902	0.81597
EP400_D_e14_86.4	ATPase	522	102	3.97246		EP400_D_e14_86.4	ATPase	423	215	1.77689
EP400_D_e15_137.3	ATPase	779	95	6.3615		EP400_D_e15_137.3	ATPase	659	172	3.45669
EP400_D_e16_170.3	ATPase	545	206	2.06153		EP400_D_e16_170.3	ATPase	414	317	1.1811
EP400_H_e28_170.6	ATPase	857	187	3.56971		EP400_H_e28_170.6	ATPase	887	265	3.02539
EP400_H_e29_190.15	ATPase	1347	202	5.19571		EP400_H_e29_190.15	ATPase	1116	396	2.55014
ERCC6_D_e7_105.7	ATPase	654	473	1.07971		ERCC6_D_e7_105.7	ATPase	540	527	0.927735
ERCC6_D_e8_136.9	ATPase	1363	968	1.10047		ERCC6_D_e8_136.9	ATPase	1374	1071	1.16257
ERCC6_D_e9_171.1	ATPase	1365	1526	0.699298		ERCC6_D_e9_171.1	ATPase	1384	1487	0.843622
ERCC6_H_e13_105.0	ATPase	1326	1220	0.849595		ERCC6_H_e13_105.0	ATPase	1377	1259	0.99125
ERCC6_H_e14_111.2	ATPase	2353	2027	0.907627		ERCC6_H_e14_111.2	ATPase	2054	1818	1.02418
ERCC6_H_e15_120.3	ATPase	2307	1927	0.936044		ERCC6_H_e15_120.3	ATPase	1873	1803	0.941697
ERCC6_H_e16_52.2	ATPase	496	303	1.2771		ERCC6_H_e16_52.2	ATPase	381	430	0.801917
EZH1_e17_96.2	SET	517	556	0.726293		EZH1_e17_96.2	SET	408	522	0.707658
EZH1_e17_96.3	SET	603	562	0.838077		EZH1_e17_96.3	SET	650	631	0.932928
EZH1_e17_96.5	SET	1589	1395	0.890457		EZH1_e17_96.5	SET	1576	1597	0.894525
EZH1_e18_82.0	SET	2147	1702	0.986233		EZH1_e18_82.0	SET	1858	1834	0.918374
EZH1_e18_82.1	SET	1528	1574	0.758944		EZH1_e18_82.1	SET	1438	1481	0.880087
EZH1_e19_81.0	SET	1460	1321	0.863972		EZH1_e19_81.0	SET	1467	1164	1.14216
EZH1_e19_81.1	SET	698	541	1.00771		EZH1_e19_81.1	SET	647	467	1.2541
EZH1_e20_85.1	SET	2502	2014	0.971328		EZH1_e20_85.1	SET	2084	2164	0.873064
EZH1_e20_85.2	SET	1769	1436	0.963039		EZH1_e20_85.2	SET	1389	1484	0.848381
EZH1_e20_85.7	SET	1711	1299	1.02964		EZH1_e20_85.7	SET	1500	1321	1.02915
EZH2_e16_96.1	SET	441	513	0.671377		EZH2_e16_96.1	SET	427	694	0.5573
EZH2_e16_96.2	SET	459	573	0.625709		EZH2_e16_96.2	SET	401	541	0.671131
EZH2_e16_96.8	SET	1349	1626	0.648618		EZH2_e16_96.8	SET	1387	1677	0.749715
EZH2_e19_85.3	SET	437	400	0.852864		EZH2_e19_85.3	SET	329	528	0.564163
GCN5_e11_127.10	AT	1373	1048	1.02398		GCN5_e11_127.10	AT	1267	1220	0.9412
GCN5_e11_127.16	AT	2292	993	1.80397		GCN5_e11_127.16	AT	2191	1158	1.71467
GCN5_e11_127.5	AT	1597	576	2.16571		GCN5_e11_127.5	AT	1477	537	2.49035
GCN5_e12_59.0	AT	2309	1091	1.65423		GCN5_e12_59.0	AT	2144	1342	1.44799
GCN5_e12_59.1	AT	2197	888	1.93349		GCN5_e12_59.1	AT	1868	1065	1.58944
GCN5_e12_59.4	AT	1983	864	1.79359		GCN5_e12_59.4	AT	1746	761	2.0784
GTF3C4_e3_131.0	AT	818	171	3.72462		GTF3C4_e3_131.0	AT	698	66	9.46176
GTF3C4_e3_131.3	AT	2005	1162	1.34872		GTF3C4_e3_131.3	AT	1945	816	2.15941
GTF3C4_e3_131.4	AT	260	125	1.61682		GTF3C4_e3_131.4	AT	223	53	3.75187
GTF3C4_e4_89.2	AT	1601	474	2.63757		GTF3C4_e4_89.2	AT	1539	271	5.13341
GTF3C4_e4_89.5	AT	531	167	2.47546		GTF3C4_e4_89.5	AT	497	115	3.88897
GTF3C4_e4_89.6	AT	567	220	2.00875		GTF3C4_e4_89.6	AT	638	128	4.48882
HAT1_e3_76.0	AT	2988	2233	1.04628		HAT1_e3_76.0	AT	2857	2435	1.06374
HAT1_e3_76.1	AT	1555	1008	1.2057		HAT1_e3_76.1	AT	1418	1234	1.04143
HAT1_e3_76.3	AT	617	410	1.17484		HAT1_e3_76.3	AT	445	242	1.66153
HAT1_e4_121.2	AT	1280	858	1.16583		HAT1_e4_121.2	AT	1272	941	1.2248
HAT1_e4_121.4	AT	485	455	0.832322		HAT1_e4_121.4	AT	413	463	0.807434
HAT1_e4_121.5	AT	479	441	0.848075		HAT1_e4_121.5	AT	474	368	1.16533
HAT1_e5_180.0	AT	1407	1268	0.867389		HAT1_e5_180.0	AT	1334	1292	0.935786
HAT1_e5_180.4	AT	1939	1468	1.03259		HAT1_e5_180.4	AT	1863	1720	0.981846
HAT1_e5_180.9	AT	1003	823	0.952347		HAT1_e5_180.9	AT	1053	697	1.36842
HAT1_e6_73.0	AT	1346	1197	0.87897		HAT1_e6_73.0	AT	1547	1399	1.00226
HAT1_e6_73.1	AT	2617	2913	0.702511		HAT1_e6_73.1	AT	2476	2864	0.783841
HBO1_e13_147.4	AT	803	703	0.89245		HBO1_e13_147.4	AT	855	452	1.71216
HBO1_e14_107.2	AT	1088	586	1.4503		HBO1_e14_107.2	AT	1215	409	2.68831
HBO1_e14_107.4	AT	1180	901	1.0235		HBO1_e14_107.4	AT	1132	1147	0.894391
HBO1_e9_192.3	AT	1659	645	2.0094		HBO1_e9_192.3	AT	1648	261	5.70687
HBO1_e9_192.8	AT	1363	526	2.02382		HBO1_e9_192.8	AT	1341	410	2.95987
HDAC1_e2_113.6	HDAC	2775	2720	0.797767		HDAC1_e2_113.6	HDAC	2663	3126	0.772403
HDAC1_e3_118.4	HDAC	470	387	0.948018		HDAC1_e3_118.4	HDAC	423	364	1.05135
HDAC1_e4_75.0	HDAC	1697	1103	1.20256		HDAC1_e4_75.0	HDAC	1587	1453	0.989984
HDAC1_e5_139.9	HDAC	2029	1381	1.14855		HDAC1_e5_139.9	HDAC	1858	1780	0.94622
HDAC1_e6_142.2	HDAC	527	407	1.01086		HDAC1_e6_142.2	HDAC	660	592	1.00959
HDAC1_e7_93.0	HDAC	1373	911	1.17784		HDAC1_e7_93.0	HDAC	1183	1036	1.03474
HDAC1_e8_109.7	HDAC	426	364	0.913446		HDAC1_e8_109.7	HDAC	444	407	0.98721
HDAC1_e9_140.6	HDAC	1339	1071	0.977194		HDAC1_e9_140.6	HDAC	1235	1313	0.852492
HDAC10_e10_90.12	HDAC	540	383	1.10057		HDAC10_e10_90.12	HDAC	687	525	1.18477
HDAC10_e11_107.3	HDAC	689	674	0.798661		HDAC10_e11_107.3	HDAC	578	550	0.951563
HDAC10_e5_105.11	HDAC	1392	1120	0.97146		HDAC10_e5_105.11	HDAC	1124	1300	0.783624
HDAC10_e6_69.8	HDAC	1582	1198	1.03222		HDAC10_e6_69.8	HDAC	1600	1613	0.899144
HDAC10_e7_127.17	HDAC	608	585	0.811847		HDAC10_e7_127.17	HDAC	485	553	0.794132
HDAC10_e8_66.0	HDAC	1208	790	1.19486		HDAC10_e8_66.0	HDAC	878	959	0.82957
HDAC10_e9_60.4	HDAC	718	516	1.08674		HDAC10_e9_60.4	HDAC	778	690	1.02129
HDAC11_e3_101.12	HDAC	1232	1152	0.835931		HDAC11_e3_101.12	HDAC	1234	1158	0.965727
HDAC11_e4_117.8	HDAC	1603	1661	0.754512		HDAC11_e4_117.8	HDAC	1307	1780	0.665614
HDAC11_e5_43.3	HDAC	934	750	0.97306		HDAC11_e5_43.3	HDAC	884	893	0.896908
HDAC11_e6_77.6	HDAC	2186	1736	0.984491		HDAC11_e6_77.6	HDAC	2149	2155	0.904054
HDAC11_e7_63.4	HDAC	783	825	0.741657		HDAC11_e7_63.4	HDAC	745	914	0.738528
HDAC11_e8_97.1	HDAC	1553	1527	0.795091		HDAC11_e8_97.1	HDAC	1293	1620	0.723483
HDAC11_e9_118.3	HDAC	1194	1160	0.804564		HDAC11_e9_118.3	HDAC	1175	1262	0.843829
HDAC2_e5_139.3	HDAC	815	916	0.695342		HDAC2_e5_139.3	HDAC	770	1036	0.673502
HDAC2_e6_140.2	HDAC	882	1100	0.626721		HDAC2_e6_140.2	HDAC	776	1230	0.571774
HDAC2_e7_93.1	HDAC	1117	1131	0.771964		HDAC2_e7_93.1	HDAC	1087	1469	0.670699
HDAC2_e8_109.3	HDAC	611	683	0.698924		HDAC2_e8_109.3	HDAC	644	723	0.806846
HDAC2_e9_140.4	HDAC	1231	1169	0.823114		HDAC2_e9_140.4	HDAC	1244	1493	0.755239
HDAC3_e10_65.1	HDAC	2145	393	4.26067		HDAC3_e10_65.1	HDAC	2050	249	7.43983
HDAC3_e11_90.1	HDAC	1689	267	4.9335		HDAC3_e11_90.1	HDAC	1654	220	6.79069
HDAC3_e6_56.1	HDAC	1226	207	4.61518		HDAC3_e6_56.1	HDAC	1135	117	8.7306
HDAC3_e7_134.16	HDAC	1732	233	5.79486		HDAC3_e7_134.16	HDAC	1444	118	11.0141
HDAC3_e8_81.4	HDAC	1075	210	3.98916		HDAC3_e8_81.4	HDAC	1055	138	6.88837
HDAC3_e9_74.6	HDAC	596	126	3.67701		HDAC3_e9_74.6	HDAC	495	111	4.01177
HDAC4_e19_56.3	HDAC	2269	2104	0.843207		HDAC4_e19_56.3	HDAC	2147	2192	0.887973
HDAC4_e20_88.1	HDAC	890	1029	0.676007		HDAC4_e20_88.1	HDAC	892	1150	0.702931
HDAC4_e21_120.2	HDAC	2366	2094	0.883451		HDAC4_e21_120.2	HDAC	2191	2473	0.803243
HDAC4_e22_98.4	HDAC	623	540	0.901099		HDAC4_e22_98.4	HDAC	509	679	0.678979
HDAC4_e23_119.4	HDAC	521	469	0.867457		HDAC4_e23_119.4	HDAC	381	547	0.630675
HDAC5_e20_56.2	HDAC	2103	1943	0.84625		HDAC5_e20_56.2	HDAC	1969	2152	0.829484
HDAC5_e21_88.3	HDAC	2112	1437	1.14897		HDAC5_e21_88.3	HDAC	1826	1610	1.02806
HDAC5_e22_120.11	HDAC	332	340	0.762023		HDAC5_e22_120.11	HDAC	363	296	1.10885
HDAC5_e23_97.7	HDAC	747	880	0.663375		HDAC5_e23_97.7	HDAC	878	831	0.957211
HDAC5_e24_119.10	HDAC	927	1000	0.724514		HDAC5_e24_119.10	HDAC	917	852	0.975114
HDAC5_e25_134.18	HDAC	989	964	0.801814		HDAC5_e25_134.18	HDAC	940	1113	0.765362
HDAC6_a1_e10_69.4	HDAC	1116	768	1.13545		HDAC6_a1_e10_69.4	HDAC	1116	850	1.18951
HDAC6_a1_e11_127.22	HDAC	690	561	0.9607		HDAC6_a1_e11_127.22	HDAC	664	507	1.18569
HDAC6_a1_e12_66.0	HDAC	582	373	1.2179		HDAC6_a1_e12_66.0	HDAC	479	489	0.886767
HDAC6_a1_e13_60.3	HDAC	1463	928	1.23208		HDAC6_a1_e13_60.3	HDAC	1466	1061	1.25209
HDAC6_a1_e14_90.1	HDAC	1489	1030	1.12989		HDAC6_a1_e14_90.1	HDAC	1452	1130	1.16447
HDAC6_a1_e8_98.7	HDAC	1567	1070	1.14466		HDAC6_a1_e8_98.7	HDAC	1449	1180	1.11286
HDAC6_a1_e9_105.4	HDAC	952	605	1.22921		HDAC6_a1_e9_105.4	HDAC	868	587	1.33906
HDAC6_a2_e20_134.7	HDAC	930	613	1.18516		HDAC6_a2_e20_134.7	HDAC	737	829	0.805426
HDAC6_a2_e21_69.4	HDAC	2397	1740	1.07704		HDAC6_a2_e21_69.4	HDAC	2171	1888	1.04241
HDAC6_a2_e22_193.13	HDAC	694	612	0.88585		HDAC6_a2_e22_193.13	HDAC	698	526	1.20146
HDAC6_a2_e23_150.7	HDAC	1518	1260	0.941756		HDAC6_a2_e23_150.7	HDAC	1371	1335	0.930784
HDAC6_a2_e24_175.10	HDAC	310	208	1.16138		HDAC6_a2_e24_175.10	HDAC	308	213	1.30591
HDAC7_e14_134.17	HDAC	473	271	1.36128		HDAC7_e14_134.17	HDAC	373	338	0.998197
HDAC7_e15_121.13	HDAC	1399	1025	1.06677		HDAC7_e15_121.13	HDAC	1236	995	1.12561
HDAC7_e16_50.6	HDAC	620	742	0.652885		HDAC7_e16_50.6	HDAC	586	588	0.902482
HDAC7_e17_108.0	HDAC	898	566	1.23927		HDAC7_e17_108.0	HDAC	911	775	1.06487
HDAC7_e18_56.0	HDAC	1880	1301	1.1296		HDAC7_e18_56.0	HDAC	1519	1234	1.11561
HDAC7_e19_88.1	HDAC	1274	960	1.03717		HDAC7_e19_88.1	HDAC	1360	897	1.37371
HDAC7_e20_120.12	HDAC	999	741	1.05341		HDAC7_e20_120.12	HDAC	1039	924	1.01884
HDAC7_e21_98.10	HDAC	667	260	2.00057		HDAC7_e21_98.10	HDAC	536	432	1.12294
HDAC7_e22_119.18	HDAC	764	455	1.31112		HDAC7_e22_119.18	HDAC	715	633	1.02298
HDAC8_e3_131.7	HDAC	1659	1255	1.03333		HDAC8_e3_131.7	HDAC	1625	1549	0.950901
HDAC8_e4_142.12	HDAC	1745	1258	1.08431		HDAC8_e4_142.12	HDAC	1779	1683	0.958177
HDAC8_e5_113.2	HDAC	443	366	0.944718		HDAC8_e5_113.2	HDAC	458	463	0.895411
HDAC8_e6_78.4	HDAC	1664	981	1.3257		HDAC8_e6_78.4	HDAC	1513	1293	1.06053
HDAC8_e7_109.1	HDAC	1155	1264	0.714287		HDAC8_e7_109.1	HDAC	1280	1418	0.818171
HDAC8_e8_173.14	HDAC	2511	1982	0.990555		HDAC8_e8_173.14	HDAC	2379	1825	1.18169
HDAC9_e17_56.1	HDAC	918	722	0.993441		HDAC9_e17_56.1	HDAC	804	835	0.87234
HDAC9_e19_120.1	HDAC	1647	1481	0.869393		HDAC9_e19_120.1	HDAC	1665	1855	0.813665
HDAC9_e19_120.7	HDAC	338	321	0.821602		HDAC9_e19_120.7	HDAC	357	396	0.815769
HDAC9_e20_98.7	HDAC	2187	2058	0.830893		HDAC9_e20_98.7	HDAC	2248	2441	0.834939
HDAC9_e21_119.13	HDAC	636	530	0.937233		HDAC9_e21_119.13	HDAC	600	807	0.673562
HDAC9_e22_134.4	HDAC	1882	1864	0.789402		HDAC9_e22_134.4	HDAC	1861	1933	0.872768
HELLS_D_e10_144.9	ATPase	1204	1384	0.680067		HELLS_D_e10_144.9	ATPase	1126	1386	0.736341
HELLS_D_e11_135.2	ATPase	1273	951	1.04616		HELLS_D_e11_135.2	ATPase	1185	839	1.2796
HELLS_D_e9_190.7	ATPase	1890	1549	0.953889		HELLS_D_e9_190.7	ATPase	1654	1400	1.07081
HELLS_H_e18_120.2	ATPase	1266	1245	0.794874		HELLS_H_e18_120.2	ATPase	1345	1319	0.924202
HELLS_H_e19_117.1	ATPase	367	289	0.990606		HELLS_H_e19_117.1	ATPase	341	244	1.26282
HELLS_H_e20_73.0	ATPase	754	701	0.84038		HELLS_H_e20_73.0	ATPase	805	672	1.085
HIF1AN_e2_251.15	hydroxylase	648	579	0.874212		HIF1AN_e2_251.15	hydroxylase	612	545	1.01676
HIF1AN_e2_251.26	hydroxylase	2402	1755	1.07006		HIF1AN_e2_251.26	hydroxylase	2438	2223	0.994271
HIF1AN_e2_251.6	hydroxylase	988	969	0.796874		HIF1AN_e2_251.6	hydroxylase	985	1082	0.82496
HIF1AN_e3_149.1	hydroxylase	677	563	0.939256		HIF1AN_e3_149.1	hydroxylase	681	814	0.757926
HIF1AN_e4_146.7	hydroxylase	1131	887	0.996467		HIF1AN_e4_146.7	hydroxylase	1087	707	1.39265
HIF1AN_e4_146.8	hydroxylase	1694	1342	0.986767		HIF1AN_e4_146.8	hydroxylase	1651	1285	1.16446
HIF1AN_e4_146.9	hydroxylase	492	417	0.921132		HIF1AN_e4_146.9	hydroxylase	489	430	1.02923
HLTF_D_e15_144.6	ATPase	976	973	0.783962		HLTF_D_e15_144.6	ATPase	892	1146	0.705382
HLTF_D_e16_139.7	ATPase	984	815	0.943469		HLTF_D_e16_139.7	ATPase	938	986	0.862014
HLTF_H_e23_181.0	ATPase	2105	2166	0.759878		HLTF_H_e23_181.0	ATPase	1877	2246	0.757647
HLTF_H_e23_181.1	ATPase	1991	1777	0.875991		HLTF_H_e23_181.1	ATPase	1991	2333	0.773705
HLTF_H_e23_181.2	ATPase	1167	902	1.0111		HLTF_H_e23_181.2	ATPase	1046	1128	0.840352
HLTF_H_e24_81.1	ATPase	1983	1678	0.923922		HLTF_H_e24_81.1	ATPase	2078	2050	0.91894
HR_e17_165.23	hydroxylase	536	528	0.792857		HR_e17_165.23	hydroxylase	597	551	0.981061
HR_e17_165.25	hydroxylase	3906	3132	0.975234		HR_e17_165.25	hydroxylase	3510	3386	0.939922
HR_e17_165.26	hydroxylase	3828	2998	0.998467		HR_e17_165.26	hydroxylase	3384	3294	0.931483
HR_e18_129.18	hydroxylase	1585	1154	1.07358		HR_e18_129.18	hydroxylase	1362	1220	1.01177
HR_e18_129.2	hydroxylase	1534	1402	0.855346		HR_e18_129.2	hydroxylase	1431	1847	0.70234
HR_e18_129.3	hydroxylase	1000	851	0.918287		HR_e18_129.3	hydroxylase	923	1151	0.726728
HSPBAP1_e3_182.1	hydroxylase	1077	966	0.871352		HSPBAP1_e3_182.1	hydroxylase	1051	928	1.02617
HSPBAP1_e3_182.7	hydroxylase	1042	774	1.05195		HSPBAP1_e3_182.7	hydroxylase	969	854	1.028
HSPBAP1_e3_182.8	hydroxylase	334	241	1.08051		HSPBAP1_e3_182.8	hydroxylase	330	275	1.08477
HSPBAP1_e4_137.11	hydroxylase	1759	1314	1.04645		HSPBAP1_e4_137.11	hydroxylase	1427	1442	0.896961
HSPBAP1_e4_137.15	hydroxylase	1066	911	0.914477		HSPBAP1_e4_137.15	hydroxylase	1038	997	0.943398
HSPBAP1_e4_137.7	hydroxylase	2279	1671	1.06628		HSPBAP1_e4_137.7	hydroxylase	2081	1952	0.966448
HSPBAP1_e5_172.2	hydroxylase	775	497	1.21778		HSPBAP1_e5_172.2	hydroxylase	587	525	1.01232
HSPBAP1_e5_172.4	hydroxylase	2025	2250	0.703717		HSPBAP1_e5_172.4	hydroxylase	1717	2086	0.7462
HSPBAP1_e5_172.8	hydroxylase	2316	1732	1.04545		HSPBAP1_e5_172.8	hydroxylase	2508	2015	1.12835
INO80_D_e13_81.3	ATPase	724	91	6.17003		INO80_D_e13_81.3	ATPase	683	65	9.3989
INO80_D_e14_96.3	ATPase	898	34	20.1942		INO80_D_e14_96.3	ATPase	864	25	30.2472
INO80_D_e15_60.2	ATPase	2593	1296	1.56402		INO80_D_e15_60.2	ATPase	2309	1118	1.87162
INO80_D_e16_143.11	ATPase	1298	169	5.97984		INO80_D_e16_143.11	ATPase	1185	72	14.7413
INO80_H_e27_128.7	ATPase	1257	73	13.3257		INO80_H_e27_128.7	ATPase	1036	18	49.6965
INO80_H_e28_95.5	ATPase	1159	125	7.20727		INO80_H_e28_95.5	ATPase	963	118	7.34525
INO80_H_e29_73.0	ATPase	730	22	25.0631		INO80_H_e29_73.0	ATPase	700	35	17.681
INO80_H_e30_95.11	ATPase	198	5	26.7843		INO80_H_e30_95.11	ATPase	173	6	22.7168
JARID2_e12_115.1	hydroxylase	1749	1417	0.964911		JARID2_e12_115.1	hydroxylase	1399	1706	0.743354
JARID2_e12_115.8	hydroxylase	781	834	0.731787		JARID2_e12_115.8	hydroxylase	655	1104	0.537655
JARID2_e13_106.4	hydroxylase	1192	990	0.941033		JARID2_e13_106.4	hydroxylase	1148	1196	0.8699
JARID2_e13_106.5	hydroxylase	1878	1704	0.861655		JARID2_e13_106.5	hydroxylase	1771	1694	0.947677
JARID2_e14_158.16	hydroxylase	724	729	0.775983		JARID2_e14_158.16	hydroxylase	711	806	0.79916
JARID2_e14_158.20	hydroxylase	1236	1165	0.829293		JARID2_e14_158.20	hydroxylase	952	1085	0.795119
JMJD1C_e21_131.3	hydroxylase	2598	3076	0.660464		JMJD1C_e21_131.3	hydroxylase	2609	3320	0.712533
JMJD1C_e21_131.4	hydroxylase	1471	951	1.20888		JMJD1C_e21_131.4	hydroxylase	1236	1005	1.11442
JMJD1C_e21_131.6	hydroxylase	728	519	1.09551		JMJD1C_e21_131.6	hydroxylase	665	775	0.77732
JMJD1C_e22_86.0	hydroxylase	1323	1097	0.94265		JMJD1C_e22_86.0	hydroxylase	1059	905	1.06023
JMJD1C_e22_86.1	hydroxylase	854	665	1.0033		JMJD1C_e22_86.1	hydroxylase	656	603	0.985194
JMJD1C_e22_86.2	hydroxylase	1229	701	1.3698		JMJD1C_e22_86.2	hydroxylase	1161	845	1.24479
JMJD4_E1_139.0	hydroxylase	764	814	0.73343		JMJD4_E1_139.0	hydroxylase	727	759	0.867684
JMJD4_E1_139.14	hydroxylase	1568	1338	0.9161		JMJD4_E1_139.14	hydroxylase	1423	1277	1.00994
JMJD4_E2_166.20	hydroxylase	1312	1089	0.941675		JMJD4_E2_166.20	hydroxylase	1093	1188	0.833796
JMJD4_E3_126.0	hydroxylase	1896	1810	0.818991		JMJD4_E3_126.0	hydroxylase	1864	1972	0.856894
JMJD4_E3_126.7	hydroxylase	668	554	0.941804		JMJD4_E3_126.7	hydroxylase	595	459	1.17337
JMJD4_E4_268.37	hydroxylase	1722	1596	0.843518		JMJD4_E4_268.37	hydroxylase	1567	1615	0.879509
JMJD4_E4_268.42	hydroxylase	1628	1444	0.881371		JMJD4_E4_268.42	hydroxylase	1464	1476	0.899033
JMJD6_e3_280.11	hydroxylase	1006	683	1.15077		JMJD6_e3_280.11	hydroxylase	1127	761	1.34156
JMJD6_e3_280.3	hydroxylase	1735	1136	1.19379		JMJD6_e3_280.3	hydroxylase	1608	1124	1.29645
JMJD6_e3_280.45	hydroxylase	1470	1072	1.0718		JMJD6_e3_280.45	hydroxylase	1454	1162	1.13398
JMJD6_e4_52.0	hydroxylase	1773	1401	0.989316		JMJD6_e4_52.0	hydroxylase	1858	1552	1.08515
JMJD7_e2_95.10	hydroxylase	524	463	0.883739		JMJD7_e2_95.10	hydroxylase	485	521	0.842823
JMJD7_e3_254.41	hydroxylase	1056	705	1.17031		JMJD7_e3_254.41	hydroxylase	741	624	1.07545
JMJD7_e4_57.0	hydroxylase	1463	1202	0.951402		JMJD7_e4_57.0	hydroxylase	1503	1314	1.0367
JMJD7_e5_96.4	hydroxylase	1323	984	1.05082		JMJD7_e5_96.4	hydroxylase	1189	1168	0.92255
JMJD7_e6_77.10	hydroxylase	527	482	0.85382		JMJD7_e6_77.10	hydroxylase	583	510	1.03494
JMJD8_E3_49.6	hydroxylase	1619	1400	0.90403		JMJD8_E3_49.6	hydroxylase	1355	1651	0.743946
JMJD8_E4_97.12	hydroxylase	659	392	1.31232		JMJD8_E4_97.12	hydroxylase	486	441	0.997455
JMJD8_E5_69.9	hydroxylase	852	862	0.772405		JMJD8_E5_69.9	hydroxylase	886	896	0.89593
JMJD8_E6_120.1	hydroxylase	552	341	1.26327		JMJD8_E6_120.1	hydroxylase	587	388	1.36893
JMJD8_E7_68.4	hydroxylase	1122	1196	0.733305		JMJD8_E7_68.4	hydroxylase	1237	1309	0.85648
JMJD8_E9_30.0	hydroxylase	1641	1240	1.03447		JMJD8_E9_30.0	hydroxylase	1562	1450	0.976403
KAT2A_BD_e17_64.2	BD	1049	919	0.892067		KAT2A_BD_e17_64.2	BD	899	1096	0.743323
KAT2A_BD_e17_64.4	BD	1340	1268	0.826085		KAT2A_BD_e17_64.4	BD	1514	1358	1.01047
KAT2A_BD_e17_64.6	BD	2462	1914	1.00572		KAT2A_BD_e17_64.6	BD	2249	1898	1.07417
KAT2A_BD_e18_158.15	BD	984	405	1.89674		KAT2A_BD_e18_158.15	BD	771	561	1.24445
KAT2A_BD_e18_158.19	BD	1626	978	1.2994		KAT2A_BD_e18_158.19	BD	1538	1077	1.29409
KAT2A_BD_e18_158.5	BD	554	366	1.18143		KAT2A_BD_e18_158.5	BD	532	509	0.946256
KAT2B_BD_e17_85.0	BD	1741	1757	0.774712		KAT2B_BD_e17_85.0	BD	1600	1737	0.83499
KAT2B_BD_e17_85.3	BD	2254	2130	0.827412		KAT2B_BD_e17_85.3	BD	2009	2063	0.882831
KAT2B_BD_e17_85.8	BD	1641	1677	0.765032		KAT2B_BD_e17_85.8	BD	1544	1787	0.783232
KAT2B_BD_e18_190.12	BD	2381	2810	0.662581		KAT2B_BD_e18_190.12	BD	2068	3076	0.60957
KAT2B_BD_e18_190.13	BD	3012	2811	0.837877		KAT2B_BD_e18_190.13	BD	2864	2804	0.926067
KAT2B_BD_e18_190.14	BD	2246	2078	0.845099		KAT2B_BD_e18_190.14	BD	2102	2069	0.921021
KDM1A_e11_140.8	hydroxylase	2306	1845	0.977205		KDM1A_e11_140.8	hydroxylase	2003	2360	0.769467
KDM1A_e13_135.3	hydroxylase	647	476	1.06143		KDM1A_e13_135.3	hydroxylase	529	591	0.810569
KDM1A_e14_112.1	hydroxylase	1281	963	1.03963		KDM1A_e14_112.1	hydroxylase	1272	1434	0.803991
KDM1A_e15_133.6	hydroxylase	1313	1233	0.832402		KDM1A_e15_133.6	hydroxylase	1060	1284	0.748207
KDM1A_e16_188.13	hydroxylase	916	617	1.15976		KDM1A_e16_188.13	hydroxylase	602	797	0.684277
KDM1A_e17_115.1	hydroxylase	2046	1473	1.08587		KDM1A_e17_115.1	hydroxylase	1898	1653	1.04081
KDM1A_e18_128.5	hydroxylase	1537	1338	0.897988		KDM1A_e18_128.5	hydroxylase	1345	1330	0.916563
KDM1A_e19_147.2	hydroxylase	2492	1783	1.09273		KDM1A_e19_147.2	hydroxylase	2186	1839	1.07756
KDM1A_e8_82.0	hydroxylase	1507	1231	0.956943		KDM1A_e8_82.0	hydroxylase	1400	1369	0.926883
KDM1A_e9_95.4	hydroxylase	2612	1917	1.06532		KDM1A_e9_95.4	hydroxylase	2202	2326	0.858274
KDM1B_e11_138.6	hydroxylase	1192	725	1.28463		KDM1B_e11_138.6	hydroxylase	1158	851	1.23283
KDM1B_e12_132.8	hydroxylase	1497	1128	1.03733		KDM1B_e12_132.8	hydroxylase	1431	1631	0.795302
KDM1B_e13_75.2	hydroxylase	1491	1274	0.914847		KDM1B_e13_75.2	hydroxylase	1570	1283	1.10906
KDM1B_e14_117.3	hydroxylase	399	383	0.813195		KDM1B_e14_117.3	hydroxylase	404	361	1.01245
KDM1B_e15_126.10	hydroxylase	306	327	0.730202		KDM1B_e15_126.10	hydroxylase	329	319	0.932739
KDM1B_e16_123.4	hydroxylase	512	640	0.62498		KDM1B_e16_123.4	hydroxylase	580	649	0.809403
KDM1B_e17_153.11	hydroxylase	2268	2475	0.716535		KDM1B_e17_153.11	hydroxylase	2055	2928	0.636347
KDM2A_E10_56.0	hydroxylase	962	731	1.02825		KDM2A_E10_56.0	hydroxylase	871	1053	0.749555
KDM2A_E10_56.4	hydroxylase	710	546	1.01567		KDM2A_E10_56.4	hydroxylase	656	943	0.630322
KDM2A_E8_93.0	hydroxylase	1219	1138	0.837278		KDM2A_E8_93.0	hydroxylase	1060	1371	0.700759
KDM2A_E8_93.6	hydroxylase	1620	1130	1.12058		KDM2A_E8_93.6	hydroxylase	1614	1596	0.916667
KDM2A_E9_154.1	hydroxylase	1914	1682	0.889653		KDM2A_E9_154.1	hydroxylase	2066	1644	1.13914
KDM2A_E9_154.10	hydroxylase	472	351	1.04948		KDM2A_E9_154.10	hydroxylase	450	214	1.89911
KDM2B_e6_107.0	hydroxylase	1326	1272	0.814885		KDM2B_e6_107.0	hydroxylase	1218	1115	0.989936
KDM2B_e6_107.3	hydroxylase	1026	1226	0.654164		KDM2B_e6_107.3	hydroxylase	818	1160	0.639063
KDM2B_e6_107.7	hydroxylase	2035	2059	0.772769		KDM2B_e6_107.7	hydroxylase	2104	2457	0.776369
KDM2B_e7_94.10	hydroxylase	1810	1586	0.892212		KDM2B_e7_94.10	hydroxylase	1664	1790	0.84269
KDM2B_e7_94.3	hydroxylase	2426	2165	0.876159		KDM2B_e7_94.3	hydroxylase	2246	2300	0.885316
KDM3A_e21_131.0	hydroxylase	1641	1122	1.14319		KDM3A_e21_131.0	hydroxylase	1613	1505	0.971458
KDM3A_e21_131.1	hydroxylase	487	379	1.003		KDM3A_e21_131.1	hydroxylase	490	513	0.864767
KDM3A_e21_131.13	hydroxylase	1695	1196	1.1078		KDM3A_e21_131.13	hydroxylase	1395	1398	0.904426
KDM3A_e22_95.1	hydroxylase	1099	757	1.13438		KDM3A_e22_95.1	hydroxylase	993	875	1.0282
KDM3A_e22_95.4	hydroxylase	1400	746	1.46636		KDM3A_e22_95.4	hydroxylase	1361	1047	1.17794
KDM3A_e22_95.5	hydroxylase	1660	1242	1.04477		KDM3A_e22_95.5	hydroxylase	1516	1189	1.15551
KDM3B_e19_131.11	hydroxylase	2951	2247	1.02688		KDM3B_e19_131.11	hydroxylase	2688	2318	1.05132
KDM3B_e19_131.2	hydroxylase	695	628	0.864552		KDM3B_e19_131.2	hydroxylase	634	678	0.846968
KDM3B_e19_131.7	hydroxylase	1626	1017	1.2496		KDM3B_e19_131.7	hydroxylase	1458	1041	1.26916
KDM3B_e20_86.1	hydroxylase	1286	1293	0.777475		KDM3B_e20_86.1	hydroxylase	1053	1610	0.592851
KDM4A_e5_95.0	hydroxylase	1972	1338	1.15214		KDM4A_e5_95.0	hydroxylase	2090	1284	1.47524
KDM4A_e6_50.2	hydroxylase	430	288	1.16468		KDM4A_e6_50.2	hydroxylase	421	262	1.45234
KDM4A_e6_50.3	hydroxylase	340	181	1.46297		KDM4A_e6_50.3	hydroxylase	385	196	1.77332
KDM4A_e7_104.4	hydroxylase	547	204	2.08931		KDM4A_e7_104.4	hydroxylase	448	287	1.41128
KDM4A_e7_104.5	hydroxylase	304	223	1.06256		KDM4A_e7_104.5	hydroxylase	335	153	1.97412
KDM4A_e8_95.6	hydroxylase	871	681	0.999262		KDM4A_e8_95.6	hydroxylase	838	638	1.18958
KDM4A_e8_95.8	hydroxylase	1382	763	1.41529		KDM4A_e8_95.8	hydroxylase	1321	842	1.42138
KDM4B_e6_106.0	hydroxylase	1186	871	1.0641		KDM4B_e6_106.0	hydroxylase	1134	850	1.2087
KDM4B_e6_106.11	hydroxylase	1108	822	1.05332		KDM4B_e6_106.11	hydroxylase	986	855	1.04481
KDM4B_e7_50.1	hydroxylase	276	203	1.05937		KDM4B_e7_50.1	hydroxylase	262	328	0.722464
KDM4B_e7_50.4	hydroxylase	564	298	1.47649		KDM4B_e7_50.4	hydroxylase	450	373	1.09153
KDM4B_e8_104.11	hydroxylase	1078	741	1.13671		KDM4B_e8_104.11	hydroxylase	1106	761	1.31656
KDM4B_e8_104.12	hydroxylase	695	621	0.874286		KDM4B_e8_104.12	hydroxylase	598	654	0.828151
KDM4B_e8_104.5	hydroxylase	1372	762	1.40689		KDM4B_e8_104.5	hydroxylase	1302	693	1.70176
KDM4B_e9_96.5	hydroxylase	834	678	0.961042		KDM4B_e9_96.5	hydroxylase	870	796	0.990146
KDM4B_e9_96.6	hydroxylase	1486	1024	1.13421		KDM4B_e9_96.6	hydroxylase	1287	1138	1.02489
KDM4B_e9_96.7	hydroxylase	936	575	1.27152		KDM4B_e9_96.7	hydroxylase	761	724	0.952117
KDM4C_e5_106.1	hydroxylase	1351	1446	0.730397		KDM4C_e5_106.1	hydroxylase	1321	1398	0.856449
KDM4C_e5_106.7	hydroxylase	1188	952	0.975281		KDM4C_e5_106.7	hydroxylase	998	1110	0.81478
KDM4C_e6_50.0	hydroxylase	1250	1230	0.794393		KDM4C_e6_50.0	hydroxylase	1028	1261	0.738845
KDM4C_e6_50.1	hydroxylase	437	407	0.838224		KDM4C_e6_50.1	hydroxylase	493	424	1.0523
KDM4C_e6_50.2	hydroxylase	2022	1645	0.960983		KDM4C_e6_50.2	hydroxylase	1928	1749	0.999263
KDM4C_e7_104.5	hydroxylase	3741	3562	0.821306		KDM4C_e7_104.5	hydroxylase	3770	3676	0.929922
KDM4C_e7_104.6	hydroxylase	1667	1529	0.85234		KDM4C_e7_104.6	hydroxylase	1830	1764	0.94041
KDM4C_e7_104.8	hydroxylase	1089	1218	0.69889		KDM4C_e7_104.8	hydroxylase	913	1247	0.663554
KDM4C_e8_96.1	hydroxylase	1364	1296	0.822724		KDM4C_e8_96.1	hydroxylase	1278	1453	0.797227
KDM4C_e8_96.5	hydroxylase	952	842	0.883544		KDM4C_e8_96.5	hydroxylase	989	1069	0.838374
KDM4D_e3_349.26	hydroxylase	275	192	1.11576		KDM4D_e3_349.26	hydroxylase	306	290	0.954015
KDM4D_e3_349.27	hydroxylase	1097	1033	0.830012		KDM4D_e3_349.27	hydroxylase	930	1092	0.771769
KDM4D_e3_349.33	hydroxylase	2422	2417	0.783545		KDM4D_e3_349.33	hydroxylase	2457	2378	0.936732
KDM4D_e3_349.39	hydroxylase	986	976	0.789561		KDM4D_e3_349.39	hydroxylase	1042	969	0.974373
KDM4D_e3_349.45	hydroxylase	835	1081	0.603745		KDM4D_e3_349.45	hydroxylase	700	1233	0.514521
KDM4D_e3_349.63	hydroxylase	704	812	0.677494		KDM4D_e3_349.63	hydroxylase	594	704	0.764262
KDM5A_e11_79.1	hydroxylase	3629	4073	0.69678		KDM5A_e11_79.1	hydroxylase	3408	4563	0.677252
KDM5A_e12_163.16	hydroxylase	1309	1017	1.00599		KDM5A_e12_163.16	hydroxylase	1179	962	1.1105
KDM5A_e12_163.5	hydroxylase	994	991	0.783929		KDM5A_e12_163.5	hydroxylase	1024	952	0.974624
KDM5A_e12_163.8	hydroxylase	1358	1146	0.926244		KDM5A_e12_163.8	hydroxylase	1287	1379	0.845895
KDM5A_e13_120.2	hydroxylase	1587	1241	0.999628		KDM5A_e13_120.2	hydroxylase	1482	1195	1.12393
KDM5A_e13_120.7	hydroxylase	902	841	0.838134		KDM5A_e13_120.7	hydroxylase	875	829	0.956239
KDM5B_e11_86.2	hydroxylase	1586	1064	1.16506		KDM5B_e11_86.2	hydroxylase	1508	1295	1.0554
KDM5B_e11_86.5	hydroxylase	434	332	1.02009		KDM5B_e11_86.5	hydroxylase	456	298	1.38362
KDM5B_e12_163.12	hydroxylase	1923	1615	0.9309		KDM5B_e12_163.12	hydroxylase	1751	1538	1.03196
KDM5B_e12_163.13	hydroxylase	1159	917	0.987758		KDM5B_e12_163.13	hydroxylase	1157	834	1.25685
KDM5B_e12_163.17	hydroxylase	1819	1484	0.958245		KDM5B_e12_163.17	hydroxylase	1727	1650	0.948762
KDM5B_e13_120.0	hydroxylase	480	543	0.690435		KDM5B_e13_120.0	hydroxylase	512	676	0.686007
KDM5B_e13_120.1	hydroxylase	622	527	0.921812		KDM5B_e13_120.1	hydroxylase	555	573	0.87708
KDM5B_e13_120.2	hydroxylase	1360	1093	0.972556		KDM5B_e13_120.2	hydroxylase	1173	1015	1.04721
KDM5C_e11_95.9	hydroxylase	598	731	0.639184		KDM5C_e11_95.9	hydroxylase	522	584	0.809415
KDM5C_e12_163.1	hydroxylase	2964	2898	0.799778		KDM5C_e12_163.1	hydroxylase	2853	3306	0.78247
KDM5C_e12_163.15	hydroxylase	580	628	0.721497		KDM5C_e12_163.15	hydroxylase	554	673	0.745586
KDM5C_e12_163.18	hydroxylase	1619	1472	0.859835		KDM5C_e12_163.18	hydroxylase	1477	1443	0.927746
KDM5C_e13_120.10	hydroxylase	620	540	0.89676		KDM5C_e13_120.10	hydroxylase	557	548	0.920331
KDM5C_e13_120.3	hydroxylase	631	709	0.695362		KDM5C_e13_120.3	hydroxylase	628	523	1.08716
KDM5C_e13_120.6	hydroxylase	642	680	0.737622		KDM5C_e13_120.6	hydroxylase	606	783	0.701126
KDM5D_e13_79.1	hydroxylase	2074	2299	0.705389		KDM5D_e13_79.1	hydroxylase	1992	2956	0.610998
KDM5D_e14_163.1	hydroxylase	1712	1911	0.700442		KDM5D_e14_163.1	hydroxylase	1850	1889	0.887808
KDM5D_e14_163.18	hydroxylase	1195	1441	0.648298		KDM5D_e14_163.18	hydroxylase	1295	1574	0.745766
KDM5D_e14_163.8	hydroxylase	582	601	0.756468		KDM5D_e14_163.8	hydroxylase	538	728	0.669419
KDM5D_e15_118.1	hydroxylase	907	972	0.729287		KDM5D_e15_118.1	hydroxylase	910	1135	0.726585
KDM5D_e15_118.5	hydroxylase	423	505	0.654159		KDM5D_e15_118.5	hydroxylase	411	586	0.635127
KDM5D_e15_118.7	hydroxylase	1010	1316	0.599949		KDM5D_e15_118.7	hydroxylase	1048	1240	0.765967
KDM6A_e25_115.7	hydroxylase	1749	1864	0.733615		KDM6A_e25_115.7	hydroxylase	1531	1737	0.798981
KDM6A_e25_115.8	hydroxylase	1730	1708	0.791892		KDM6A_e25_115.8	hydroxylase	1697	1919	0.801659
KDM6A_e26_188.12	hydroxylase	2846	2770	0.803414		KDM6A_e26_188.12	hydroxylase	2720	2998	0.822609
KDM6A_e26_188.17	hydroxylase	1043	996	0.818447		KDM6A_e26_188.17	hydroxylase	1004	1272	0.71536
KDM6B_e18_115.4	hydroxylase	1060	694	1.19334		KDM6B_e18_115.4	hydroxylase	973	715	1.23266
KDM6B_e18_115.6	hydroxylase	1699	1222	1.0868		KDM6B_e18_115.6	hydroxylase	1604	1261	1.15283
KDM6B_e18_115.7	hydroxylase	1224	924	1.03526		KDM6B_e18_115.7	hydroxylase	1231	879	1.26885
KDM6B_e19_188.0	hydroxylase	1515	1212	0.977095		KDM6B_e19_188.0	hydroxylase	1344	1649	0.738801
KDM6B_e19_188.26	hydroxylase	713	638	0.873059		KDM6B_e19_188.26	hydroxylase	602	610	0.893736
KDM6B_e19_188.5	hydroxylase	855	768	0.8699		KDM6B_e19_188.5	hydroxylase	666	741	0.814165
KDM7A_e6_187.15	hydroxylase	1627	1801	0.706305		KDM7A_e6_187.15	hydroxylase	1628	1952	0.756068
KDM7A_e6_187.17	hydroxylase	1680	1519	0.864639		KDM7A_e6_187.17	hydroxylase	1538	1834	0.760204
KDM7A_e6_187.7	hydroxylase	1809	1660	0.851986		KDM7A_e6_187.7	hydroxylase	1698	1640	0.938516
KDM7A_e6_187.8	hydroxylase	596	526	0.884957		KDM7A_e6_187.8	hydroxylase	582	678	0.7775
KDM7A_e6_187.9	hydroxylase	2332	1993	0.914866		KDM7A_e6_187.9	hydroxylase	2105	2083	0.916139
KDM8_e4_133.0	hydroxylase	596	260	1.78762		KDM8_e4_133.0	hydroxylase	508	203	2.25954
KDM8_e4_133.7	hydroxylase	1802	858	1.64126		KDM8_e4_133.7	hydroxylase	1911	702	2.46576
KDM8_e4_133.8	hydroxylase	1242	446	2.17437		KDM8_e4_133.8	hydroxylase	999	471	1.91998
KDM8_e5_45.0	hydroxylase	941	1075	0.684183		KDM8_e5_45.0	hydroxylase	968	1042	0.841817
KDM8_e5_45.1	hydroxylase	2002	987	1.58529		KDM8_e5_45.1	hydroxylase	1995	740	2.44212
KDM8_e6_150.10	hydroxylase	1586	772	1.60529		KDM8_e6_150.10	hydroxylase	1502	751	1.81173
KDM8_e6_150.12	hydroxylase	1942	1097	1.38369		KDM8_e6_150.12	hydroxylase	2116	813	2.35792
KDM8_e6_150.27	hydroxylase	1153	614	1.46695		KDM8_e6_150.27	hydroxylase	1060	648	1.48153
KDM8_e7_159.0	hydroxylase	1106	445	1.94061		KDM8_e7_159.0	hydroxylase	1053	439	2.17098
KDM8_e7_159.11	hydroxylase	478	133	2.79471		KDM8_e7_159.11	hydroxylase	467	186	2.2661
KDM8_e7_159.7	hydroxylase	477	227	1.63797		KDM8_e7_159.7	hydroxylase	409	251	1.47255
KMT2A_BD_e16_174.15	BD	1721	1585	0.848876		KMT2A_BD_e16_174.15	BD	1828	1891	0.876323
KMT2A_BD_e16_174.16	BD	3692	3156	0.914795		KMT2A_BD_e16_174.16	BD	3741	3891	0.871792
KMT2A_BD_e16_174.22	BD	985	893	0.862008		KMT2A_BD_e16_174.22	BD	907	1217	0.675431
KMT2A_BD_e17_111.1	BD	1348	1353	0.778839		KMT2A_BD_e17_111.1	BD	1324	1829	0.656216
KMT2A_BD_e17_111.4	BD	782	728	0.839297		KMT2A_BD_e17_111.4	BD	830	957	0.785855
KMT2A_BD_e17_111.6	BD	2496	2380	0.820034		KMT2A_BD_e17_111.6	BD	2531	2848	0.805752
KMT2A_BD_e18_50.1	BD	537	493	0.85064		KMT2A_BD_e18_50.1	BD	404	619	0.591075
KMT2A_BD_e18_50.2	BD	1961	2169	0.706917		KMT2A_BD_e18_50.2	BD	1974	2000	0.894763
KMT2A_BD_e18_50.3	BD	1468	1528	0.751082		KMT2A_BD_e18_50.3	BD	1533	1598	0.869574
KMT2B_e36_130.0	SET	1360	957	1.11065		KMT2B_e36_130.0	SET	1305	1114	1.0616
KMT2B_e36_130.2	SET	1495	858	1.36165		KMT2B_e36_130.2	SET	1150	991	1.05151
KMT2B_e36_130.3	SET	1464	840	1.36196		KMT2B_e36_130.3	SET	1141	956	1.08144
KMT2B_e37_218.0	SET	1075	1040	0.807896		KMT2B_e37_218.0	SET	1076	919	1.06086
KMT2B_e37_218.11	SET	1524	1005	1.18519		KMT2B_e37_218.11	SET	1185	1093	0.982485
KMT2B_e37_218.25	SET	1273	955	1.04178		KMT2B_e37_218.25	SET	1016	1013	0.908832
KMT2C_e58_117.3	SET	590	557	0.827359		KMT2C_e58_117.3	SET	616	475	1.17394
KMT2C_e58_117.5	SET	2009	2106	0.745877		KMT2C_e58_117.5	SET	2058	2178	0.856632
KMT2C_e58_117.6	SET	671	871	0.602034		KMT2C_e58_117.6	SET	699	913	0.693686
KMT2C_e59_74.1	SET	1209	1301	0.726432		KMT2C_e59_74.1	SET	1067	1530	0.632126
KMT2C_e59_74.2	SET	792	879	0.704136		KMT2C_e59_74.2	SET	737	941	0.709655
KMT2C_e59_74.3	SET	700	648	0.843929		KMT2C_e59_74.3	SET	819	745	0.995834
KMT2C_e60_109.0	SET	2305	2263	0.796422		KMT2C_e60_109.0	SET	2160	2827	0.69275
KMT2C_e60_109.5	SET	94	133	0.549587		KMT2C_e60_109.5	SET	83	146	0.512417
KMT2C_e60_109.7	SET	865	827	0.817348		KMT2C_e60_109.7	SET	635	840	0.684879
KMT2D_e50_153.15	SET	378	301	0.979727		KMT2D_e50_153.15	SET	439	301	1.3188
KMT2D_e50_153.16	SET	1261	1211	0.813949		KMT2D_e50_153.16	SET	1429	1262	1.02624
KMT2D_e50_153.9	SET	1004	923	0.850102		KMT2D_e50_153.9	SET	913	960	0.861742
KMT2D_e51_74.0	SET	1014	950	0.834187		KMT2D_e51_74.0	SET	1158	1102	0.952264
KMT2D_e51_74.1	SET	1231	757	1.27063		KMT2D_e51_74.1	SET	1163	867	1.21533
KMT2D_e52_109.3	SET	889	704	0.986628		KMT2D_e52_109.3	SET	739	637	1.05069
KMT2D_e52_109.6	SET	380	318	0.932387		KMT2D_e52_109.6	SET	311	332	0.847277
KMT2D_e52_109.8	SET	2356	2042	0.902111		KMT2D_e52_109.8	SET	2404	2293	0.950488
MINA_e2_254.19	hydroxylase	904	966	0.731386		MINA_e2_254.19	hydroxylase	895	1098	0.738669
MINA_e3_120.4	hydroxylase	1347	1199	0.878157		MINA_e3_120.4	hydroxylase	1435	1276	1.01925
MINA_e4_129.12	hydroxylase	957	946	0.790621		MINA_e4_129.12	hydroxylase	835	879	0.860672
MINA_e5_104.4	hydroxylase	1292	1306	0.773332		MINA_e5_104.4	hydroxylase	1412	1459	0.877197
MINA_e6_103.8	hydroxylase	1173	1109	0.826736		MINA_e6_103.8	hydroxylase	1160	1100	0.955642
MINA_e7_172.5	hydroxylase	1261	1096	0.899294		MINA_e7_172.5	hydroxylase	1064	1163	0.829108
MLL1_e35_130.12	SET	1228	1167	0.822514		MLL1_e35_130.12	SET	1064	1269	0.759902
MLL1_e35_130.6	SET	2907	3051	0.745072		MLL1_e35_130.6	SET	2733	3619	0.684747
MLL1_e35_130.8	SET	915	729	0.980696		MLL1_e35_130.8	SET	891	815	0.990432
MLL1_e36_237.14	SET	329	202	1.26903		MLL1_e36_237.14	SET	269	247	0.984127
MLL1_e36_237.6	SET	548	463	0.924216		MLL1_e36_237.6	SET	509	561	0.821564
MLL1_e36_237.8	SET	384	640	0.468735		MLL1_e36_237.8	SET	437	657	0.602427
MLL5_e11_105.0	SET	2021	1427	1.10716		MLL5_e11_105.0	SET	1798	1306	1.24776
MLL5_e11_105.4	SET	694	418	1.29622		MLL5_e11_105.4	SET	571	449	1.15107
MLL5_e11_105.5	SET	1231	946	1.01699		MLL5_e11_105.5	SET	1291	812	1.44037
MLL5_e12_118.4	SET	1916	1729	0.866385		MLL5_e12_118.4	SET	1892	1710	1.00296
MLL5_e12_118.6	SET	1035	594	1.3611		MLL5_e12_118.6	SET	940	662	1.28607
MLL5_e12_118.7	SET	657	464	1.10566		MLL5_e12_118.7	SET	662	373	1.60577
MLL5_e13_110.1	SET	1898	1090	1.36102		MLL5_e13_110.1	SET	1692	1315	1.16617
MLL5_e13_110.2	SET	1287	1196	0.841144		MLL5_e13_110.2	SET	1452	1184	1.1114
MLL5_e13_110.3	SET	1821	2032	0.70069		MLL5_e13_110.3	SET	1801	2358	0.692454
MOF_e10_135.9	AT	977	97	7.81523		MOF_e10_135.9	AT	711	128	5.00243
MOF_e5_164.14	AT	2353	142	12.8901		MOF_e5_164.14	AT	2056	118	15.6821
MOF_e6_90.7	AT	2203	41	41.2411		MOF_e6_90.7	AT	1997	30	58.6016
MOF_e7_141.6	AT	512	128	3.10972		MOF_e7_141.6	AT	401	111	3.24994
MOF_e8_94.3	AT	1151	44	20.1037		MOF_e8_94.3	AT	942	54	15.5601
MOF_e9_151.11	AT	497	42	9.08658		MOF_e9_151.11	AT	446	65	6.1375
MORF_e12_162.0	AT	461	522	0.689742		MORF_e12_162.0	AT	512	446	1.03906
MORF_e12_162.8	AT	2055	2155	0.745613		MORF_e12_162.8	AT	1689	2443	0.626805
MORF_e12_162.9	AT	485	617	0.614063		MORF_e12_162.9	AT	517	816	0.573992
MORF_e13_94.8	AT	1262	1197	0.824116		MORF_e13_94.8	AT	1277	964	1.20031
MORF_e14_210.22	AT	820	620	1.03319		MORF_e14_210.22	AT	733	674	0.985026
MORF_e14_210.3	AT	1544	1268	0.951847		MORF_e14_210.3	AT	1371	1463	0.849399
MOZ_e12_162.1	AT	557	381	1.14116		MOZ_e12_162.1	AT	484	513	0.854178
MOZ_e12_162.7	AT	1668	1564	0.833775		MOZ_e12_162.7	AT	1584	1443	0.994956
MOZ_e12_162.8	AT	1796	1775	0.791085		MOZ_e12_162.8	AT	1739	1371	1.14964
MOZ_e13_94.4	AT	614	663	0.723518		MOZ_e13_94.4	AT	535	415	1.16666
MOZ_e13_94.5	AT	2204	1714	1.00533		MOZ_e13_94.5	AT	1950	1700	1.03978
MOZ_e14_210.0	AT	669	674	0.775478		MOZ_e14_210.0	AT	560	717	0.707469
MOZ_e14_210.3	AT	1014	978	0.810324		MOZ_e14_210.3	AT	1008	912	1.00143
NAT10_e18_75.1	AT	543	659	0.643733		NAT10_e18_75.1	AT	502	662	0.686814
NAT10_e18_75.4	AT	1884	215	6.82924		NAT10_e18_75.4	AT	1732	126	12.378
NAT10_e18_75.5	AT	4481	490	7.14156		NAT10_e18_75.5	AT	4400	550	7.24373
NAT10_e18_75.6	AT	1849	172	8.37037		NAT10_e18_75.6	AT	1850	318	5.26133
NAT10_e18_75.7	AT	1007	221	3.55148		NAT10_e18_75.7	AT	1075	179	5.41936
NCOA1_e17_403.2	AT	655	536	0.954443		NCOA1_e17_403.2	AT	538	629	0.774629
NCOA1_e17_403.26	AT	677	594	0.890302		NCOA1_e17_403.26	AT	629	655	0.869753
NCOA1_e17_403.31	AT	511	510	0.782514		NCOA1_e17_403.31	AT	548	470	1.05544
NCOA1_e18_175.12	AT	998	841	0.927337		NCOA1_e18_175.12	AT	945	1071	0.799581
NCOA1_e18_175.13	AT	468	439	0.832367		NCOA1_e18_175.13	AT	441	481	0.829971
NCOA1_e18_175.22	AT	1639	1666	0.769143		NCOA1_e18_175.22	AT	1617	1941	0.755213
NCOA2_e19_235.10	AT	1275	1270	0.784776		NCOA2_e19_235.10	AT	1242	1430	0.787223
NCOA2_e19_235.14	AT	782	661	0.924269		NCOA2_e19_235.14	AT	626	883	0.642326
NCOA2_e19_235.16	AT	1197	1100	0.850549		NCOA2_e19_235.16	AT	1094	1282	0.77341
NCOA2_e20_178.17	AT	1865	1607	0.907316		NCOA2_e20_178.17	AT	1735	1704	0.922968
NCOA2_e20_178.18	AT	2160	1980	0.85295		NCOA2_e20_178.18	AT	2143	2055	0.94538
NCOA2_e20_178.20	AT	860	643	1.04488		NCOA2_e20_178.20	AT	768	744	0.935076
neg01	neg_control	840	907	0.723776		neg01	neg_control	673	926	0.658517
neg02	neg_control	936	830	0.881242		neg02	neg_control	859	1041	0.747742
neg03	neg_control	3399	3641	0.730035		neg03	neg_control	3135	4203	0.676351
neg04	neg_control	904	1006	0.702327		neg04	neg_control	797	975	0.740692
neg05	neg_control	251	282	0.69427		neg05	neg_control	259	367	0.638483
neg06	neg_control	2861	3338	0.67025		neg06	neg_control	2801	3577	0.710022
neg07	neg_control	1357	1399	0.758274		neg07	neg_control	1313	1881	0.632782
neg08	neg_control	1612	1730	0.7285		neg08	neg_control	1756	2108	0.755188
neg09	neg_control	642	711	0.705496		neg09	neg_control	690	923	0.677343
neg10	neg_control	1285	1351	0.743538		neg10	neg_control	1203	1484	0.734775
neg11	neg_control	1124	1273	0.690205		neg11	neg_control	1027	1226	0.759183
neg12	neg_control	947	806	0.918122		neg12	neg_control	839	1121	0.678255
neg13	neg_control	1553	1740	0.697805		neg13	neg_control	1433	1871	0.694304
neg14	neg_control	65	34	1.46172		neg14	neg_control	13	68	0.171107
neg15	neg_control	905	830	0.852056		neg15	neg_control	735	1002	0.664683
neg16	neg_control	1390	1396	0.778382		neg16	neg_control	1215	1448	0.760543
neg17	neg_control	877	876	0.782374		neg17	neg_control	718	1084	0.600233
neg18	neg_control	2224	2438	0.713294		neg18	neg_control	1851	2370	0.708076
neg19	neg_control	605	676	0.699219		neg19	neg_control	659	760	0.785492
neg20	neg_control	1482	1748	0.662856		neg20	neg_control	1559	2129	0.663855
neg21	neg_control	693	835	0.648555		neg21	neg_control	653	911	0.649457
neg22	neg_control	911	1093	0.65147		neg22	neg_control	759	1054	0.652552
neg23	neg_control	1578	1745	0.707007		neg23	neg_control	1286	1653	0.705209
neg24	neg_control	408	392	0.812485		neg24	neg_control	327	452	0.654827
neg25	neg_control	608	770	0.616991		neg25	neg_control	631	685	0.834357
neg26	neg_control	2117	2379	0.69581		neg26	neg_control	2025	2463	0.745398
neg27	neg_control	1518	1892	0.627304		neg27	neg_control	1311	1624	0.731749
neg28	neg_control	326	397	0.641031		neg28	neg_control	329	495	0.601705
neg29	neg_control	1821	1851	0.769178		neg29	neg_control	1401	2009	0.632193
neg30	neg_control	1683	2036	0.646318		neg30	neg_control	1586	1934	0.743414
neg31	neg_control	887	932	0.74379		neg31	neg_control	854	1218	0.635441
neg32	neg_control	2954	3104	0.744194		neg32	neg_control	2688	3390	0.718954
neg33	neg_control	791	911	0.678566		neg33	neg_control	645	932	0.62706
neg34	neg_control	1859	2007	0.724218		neg34	neg_control	1668	2232	0.677506
neg35	neg_control	736	878	0.655094		neg35	neg_control	728	1094	0.603034
neg36	neg_control	762	832	0.715699		neg36	neg_control	779	1041	0.678104
neg37	neg_control	735	884	0.649767		neg37	neg_control	589	726	0.734893
neg38	neg_control	725	758	0.747356		neg38	neg_control	674	611	0.998993
neg39	neg_control	673	828	0.635157		neg39	neg_control	509	769	0.599608
neg40	neg_control	1851	2012	0.71931		neg40	neg_control	1792	2119	0.766671
neg41	neg_control	578	648	0.696844		neg41	neg_control	547	627	0.790096
neg42	neg_control	512	535	0.747461		neg42	neg_control	462	712	0.587756
neg43	neg_control	489	576	0.663138		neg43	neg_control	456	642	0.643287
neg44	neg_control	441	447	0.770333		neg44	neg_control	426	430	0.896631
neg45	neg_control	1239	1537	0.630207		neg45	neg_control	1115	1593	0.634453
neg46	neg_control	1124	1159	0.758048		neg46	neg_control	979	1208	0.734476
neg47	neg_control	929	1114	0.651827		neg47	neg_control	777	1003	0.701965
neg48	neg_control	1015	1264	0.627707		neg48	neg_control	988	1223	0.732144
neg49	neg_control	829	966	0.670707		neg49	neg_control	670	1092	0.556006
neg50	neg_control	572	616	0.725389		neg50	neg_control	501	608	0.746233
NO66_e1_980.106	hydroxylase	404	388	0.812796		NO66_e1_980.106	hydroxylase	387	369	0.948869
NO66_e1_980.131	hydroxylase	2819	2014	1.09439		NO66_e1_980.131	hydroxylase	2399	2107	1.03221
NO66_e1_980.160	hydroxylase	902	693	1.01693		NO66_e1_980.160	hydroxylase	984	750	1.18849
NO66_e1_980.162	hydroxylase	598	492	0.94919		NO66_e1_980.162	hydroxylase	524	484	0.980078
NO66_e1_980.7	hydroxylase	1570	1496	0.820442		NO66_e1_980.7	hydroxylase	1444	1664	0.78662
NSD1_e19_117.0	SET	1344	909	1.1555		NSD1_e19_117.0	SET	1362	792	1.55791
NSD1_e20_142.13	SET	1271	627	1.58359		NSD1_e20_142.13	SET	1240	597	1.88094
NSD1_e20_142.4	SET	478	299	1.24718		NSD1_e20_142.4	SET	422	323	1.18163
NSD1_e20_142.7	SET	1134	654	1.35464		NSD1_e20_142.7	SET	1147	489	2.12343
NSD1_e21_41.0	SET	1473	979	1.17593		NSD1_e21_41.0	SET	1527	1067	1.29686
NSD1_e21_41.1	SET	662	454	1.13857		NSD1_e21_41.1	SET	710	582	1.10471
NSD2_e19_73.7	SET	3320	1343	1.93248		NSD2_e19_73.7	SET	3015	1472	1.85652
NSD2_e19_73.8	SET	1757	565	2.42901		NSD2_e19_73.8	SET	1600	667	2.17266
NSD2_e20_117.0	SET	643	367	1.3675		NSD2_e20_117.0	SET	577	334	1.56257
NSD2_e20_117.3	SET	1591	897	1.38614		NSD2_e20_117.3	SET	1562	889	1.59193
NSD2_e21_142.16	SET	1807	831	1.69924		NSD2_e21_142.16	SET	1604	869	1.67232
NSD2_e21_142.6	SET	582	251	1.80803		NSD2_e21_142.6	SET	504	205	2.21997
NSD3_e20_117.1	SET	767	814	0.73631		NSD3_e20_117.1	SET	936	885	0.958243
NSD3_e20_117.2	SET	1023	850	0.940511		NSD3_e20_117.2	SET	908	777	1.05863
NSD3_e21_142.0	SET	1160	1162	0.780309		NSD3_e21_142.0	SET	1139	1044	0.98863
NSD3_e21_142.11	SET	1865	1652	0.882612		NSD3_e21_142.11	SET	1647	1578	0.946073
NSD3_e21_142.4	SET	563	441	0.996798		NSD3_e21_142.4	SET	557	520	0.969801
PADI4_e10_108.0	hydroxylase	1831	1455	0.983782		PADI4_e10_108.0	hydroxylase	1718	1769	0.88036
PADI4_e11_155.15	hydroxylase	1212	1010	0.93789		PADI4_e11_155.15	hydroxylase	1057	1247	0.768211
PADI4_e12_145.10	hydroxylase	1390	1316	0.825672		PADI4_e12_145.10	hydroxylase	1434	1622	0.801389
PADI4_e13_103.11	hydroxylase	1292	1284	0.786574		PADI4_e13_103.11	hydroxylase	1032	1325	0.705918
PADI4_e14_70.0	hydroxylase	1798	1610	0.873091		PADI4_e14_70.0	hydroxylase	1750	2085	0.760906
PADI4_e15_129.1	hydroxylase	441	402	0.856397		PADI4_e15_129.1	hydroxylase	361	524	0.623753
PADI4_e8_104.8	hydroxylase	849	600	1.10534		PADI4_e8_104.8	hydroxylase	740	845	0.793409
PADI4_e9_112.0	hydroxylase	1292	1117	0.904091		PADI4_e9_112.0	hydroxylase	1183	1196	0.896421
PBRM1_BD1_e3_98.0	BD1	1632	1372	0.929877		PBRM1_BD1_e3_98.0	BD1	1526	1188	1.16411
PBRM1_BD1_e3_98.1	BD1	680	497	1.0685		PBRM1_BD1_e3_98.1	BD1	588	632	0.842607
PBRM1_BD1_e3_98.6	BD1	1329	935	1.11085		PBRM1_BD1_e3_98.6	BD1	1397	982	1.28906
PBRM1_BD1_e4_148.0	BD1	1505	1067	1.10245		PBRM1_BD1_e4_148.0	BD1	1344	1148	1.06097
PBRM1_BD1_e4_148.5	BD1	2182	2421	0.704736		PBRM1_BD1_e4_148.5	BD1	2303	2978	0.701172
PBRM1_BD1_e4_148.6	BD1	924	716	1.0083		PBRM1_BD1_e4_148.6	BD1	951	1202	0.717028
PBRM1_BD1_e5_86.0	BD1	346	235	1.14781		PBRM1_BD1_e5_86.0	BD1	286	283	0.913646
PBRM1_BD1_e5_86.3	BD1	871	932	0.730373		PBRM1_BD1_e5_86.3	BD1	884	984	0.814038
PBRM1_BD1_e5_86.5	BD1	1039	655	1.23926		PBRM1_BD1_e5_86.5	BD1	829	751	0.99995
PBRM1_BD2_e6_117.1	BD2	1218	872	1.09156		PBRM1_BD2_e6_117.1	BD2	1037	1108	0.848148
PBRM1_BD2_e6_117.2	BD2	1486	1211	0.959182		PBRM1_BD2_e6_117.2	BD2	1418	1234	1.04143
PBRM1_BD2_e6_117.5	BD2	942	911	0.808103		PBRM1_BD2_e6_117.5	BD2	897	731	1.11154
PBRM1_BD2_e7_69.1	BD2	2289	1788	1.00091		PBRM1_BD2_e7_69.1	BD2	2184	1878	1.05423
PBRM1_BD2_e7_69.2	BD2	1136	772	1.14982		PBRM1_BD2_e7_69.2	BD2	1058	838	1.14383
PBRM1_BD2_e8_99.1	BD2	506	548	0.721203		PBRM1_BD2_e8_99.1	BD2	530	607	0.790727
PBRM1_BD2_e8_99.2	BD2	2367	1983	0.933278		PBRM1_BD2_e8_99.2	BD2	2160	1805	1.08479
PBRM1_BD2_e8_99.4	BD2	2590	1970	1.02794		PBRM1_BD2_e8_99.4	BD2	2332	1816	1.16408
PBRM1_BD3_e12_158.2	BD3	1227	907	1.05723		PBRM1_BD3_e12_158.2	BD3	1212	850	1.29184
PBRM1_BD3_e12_158.3	BD3	1170	974	0.938826		PBRM1_BD3_e12_158.3	BD3	1228	976	1.14007
PBRM1_BD3_e13_140.1	BD3	504	528	0.745522		PBRM1_BD3_e13_140.1	BD3	500	506	0.894601
PBRM1_BD3_e13_140.2	BD3	1944	1429	1.06349		PBRM1_BD3_e13_140.2	BD3	1565	1485	0.955236
PBRM1_BD3_e13_140.4	BD3	552	525	0.821183		PBRM1_BD3_e13_140.4	BD3	459	480	0.865644
PBRM1_BD4_e15_277.0	BD4	335	368	0.710529		PBRM1_BD4_e15_277.0	BD4	356	308	1.04523
PBRM1_BD4_e15_277.10	BD4	782	614	0.994929		PBRM1_BD4_e15_277.10	BD4	683	485	1.27484
PBRM1_BD4_e15_277.14	BD4	1259	985	0.998968		PBRM1_BD4_e15_277.14	BD4	1140	936	1.10356
PBRM1_BD5_e17_310.11	BD5	1472	863	1.33294		PBRM1_BD5_e17_310.11	BD5	1325	849	1.41394
PBRM1_BD5_e17_310.16	BD5	1110	932	0.930785		PBRM1_BD5_e17_310.16	BD5	1045	797	1.18782
PBRM1_BD5_e17_310.9	BD5	1021	772	1.03342		PBRM1_BD5_e17_310.9	BD5	1024	783	1.18474
PBRM1_BD6_e17_246.5	BD6	1214	925	1.02569		PBRM1_BD6_e17_246.5	BD6	1243	867	1.29893
PBRM1_BD6_e17_246.7	BD6	768	653	0.918829		PBRM1_BD6_e17_246.7	BD6	567	640	0.802372
PBRM1_BD6_e17_246.8	BD6	371	304	0.952119		PBRM1_BD6_e17_246.8	BD6	282	182	1.39832
PCAF_e11_118.0	AT	610	606	0.786328		PCAF_e11_118.0	AT	577	782	0.668426
PCAF_e11_118.1	AT	1865	2028	0.719035		PCAF_e11_118.1	AT	1935	1915	0.915998
PCAF_e11_118.7	AT	2813	2500	0.879834		PCAF_e11_118.7	AT	2584	2520	0.929659
PCAF_e11_118.9	AT	1240	1145	0.846499		PCAF_e11_118.9	AT	1111	1454	0.692575
PCAF_e12_59.0	AT	965	877	0.859899		PCAF_e12_59.0	AT	834	824	0.916957
PCNA_e2.1	positive _control	2257	48	36.189		PCNA_e2.1	positive _control	1833	247	6.70597
PCNA_e2.2	positive _control	842	9	67.3261		PCNA_e2.2	positive _control	621	13	40.4993
PCNA_e3.1	positive _control	3068	3137	0.764785		PCNA_e3.1	positive _control	2659	3363	0.716906
PCNA_e3.2	positive _control	943	39	18.5409		PCNA_e3.2	positive _control	878	187	4.23779
PHF2_e6_79.6	hydroxylase	668	578	0.902751		PHF2_e6_79.6	hydroxylase	546	658	0.751547
PHF2_e7_163.12	hydroxylase	817	464	1.37493		PHF2_e7_163.12	hydroxylase	707	628	1.01958
PHF2_e7_163.13	hydroxylase	945	757	0.975426		PHF2_e7_163.13	hydroxylase	906	666	1.23211
PHF2_e7_163.9	hydroxylase	1140	1057	0.842976		PHF2_e7_163.9	hydroxylase	1092	815	1.21386
PHF2_e8_50.1	hydroxylase	1292	1280	0.789031		PHF2_e8_50.1	hydroxylase	1227	1414	0.78651
PHF2_e8_50.3	hydroxylase	1852	1226	1.18081		PHF2_e8_50.3	hydroxylase	1586	1263	1.13809
PHF8_e7_187.10	hydroxylase	2513	2016	0.974631		PHF8_e7_187.10	hydroxylase	2435	2068	1.06745
PHF8_e7_187.12	hydroxylase	1199	1175	0.797626		PHF8_e7_187.12	hydroxylase	1108	1315	0.763664
PHF8_e7_187.13	hydroxylase	1850	1595	0.906786		PHF8_e7_187.13	hydroxylase	1737	1638	0.961243
PHF8_e7_187.2	hydroxylase	318	337	0.736372		PHF8_e7_187.2	hydroxylase	370	276	1.21187
PHF8_e7_187.8	hydroxylase	2074	1440	1.12595		PHF8_e7_187.8	hydroxylase	1966	1484	1.2008
PhIP_BD1_e30_86.1	BD1	750	372	1.57367		PhIP_BD1_e30_86.1	BD1	705	297	2.14633
PhIP_BD1_e30_86.7	BD1	2387	2593	0.719823		PhIP_BD1_e30_86.7	BD1	2349	2522	0.844441
PhIP_BD1_e31_121.0	BD1	1523	1535	0.77567		PhIP_BD1_e31_121.0	BD1	1330	1541	0.782314
PhIP_BD1_e31_121.12	BD1	1725	1347	1.0011		PhIP_BD1_e31_121.12	BD1	1607	1533	0.950177
PhIP_BD1_e31_121.5	BD1	1953	1806	0.84548		PhIP_BD1_e31_121.5	BD1	1745	2013	0.785857
PhIP_BD1_e32_126.0	BD1	571	488	0.91375		PhIP_BD1_e32_126.0	BD1	575	647	0.804902
PhIP_BD1_e32_126.4	BD1	945	936	0.789042		PhIP_BD1_e32_126.4	BD1	904	1050	0.780175
PhIP_BD1_e32_126.5	BD1	2652	2163	0.958665		PhIP_BD1_e32_126.5	BD1	2323	2626	0.802033
PhIP_BD2_e35_80.0	BD2	1279	1108	0.902259		PhIP_BD2_e35_80.0	BD2	1332	1425	0.847229
PhIP_BD2_e35_80.2	BD2	1225	1031	0.928656		PhIP_BD2_e35_80.2	BD2	1103	1514	0.660355
PhIP_BD2_e35_80.3	BD2	752	737	0.797253		PhIP_BD2_e35_80.3	BD2	758	793	0.865939
PhIP_BD2_e36_153.0	BD2	2023	2202	0.718342		PhIP_BD2_e36_153.0	BD2	1870	2177	0.778736
PhIP_BD2_e36_153.1	BD2	1059	1040	0.795871		PhIP_BD2_e36_153.1	BD2	977	1352	0.654959
PhIP_BD2_e36_153.9	BD2	1623	1706	0.743785		PhIP_BD2_e36_153.9	BD2	1486	1728	0.779534
PhIP_BD2_e37_80.0	BD2	703	743	0.739293		PhIP_BD2_e37_80.0	BD2	756	780	0.878032
POLR2A_e10.1	positive _control	648	0	648		POLR2A_e10.1	positive _control	580	0	580
POLR2A_e10.2	positive _control	993	32	23.6929		POLR2A_e10.2	positive _control	965	71	12.1715
POLR2A_e2.1	positive _control	313	1	137.372		POLR2A_e2.1	positive _control	376	9	34.4219
POLR2A_e2.2	positive _control	842	376	1.74795		POLR2A_e2.2	positive _control	763	365	1.89122
POLR2A_e27.1	positive _control	1408	416	2.64241		POLR2A_e27.1	positive _control	1162	549	1.91648
POLR2A_e27.2	positive _control	1063	771	1.07732		POLR2A_e27.2	positive _control	1021	569	1.62484
POLR2A_e28.1	positive _control	714	250	2.22694		POLR2A_e28.1	positive _control	586	226	2.34227
POLR2A_e28.2	positive _control	691	233	2.31192		POLR2A_e28.2	positive _control	584	247	2.13654
POLR2D_e2.1	positive _control	1126	181	4.845		POLR2D_e2.1	positive _control	1110	276	3.63561
POLR2D_e3.1	positive _control	496	10	35.9817		POLR2D_e3.1	positive _control	482	29	14.6171
PRDM2_e3_47.0	SET	593	708	0.654408		PRDM2_e3_47.0	SET	614	692	0.803676
PRDM2_e3_47.1	SET	528	549	0.75119		PRDM2_e3_47.1	SET	596	633	0.852724
PRDM2_e4_104.3	SET	1702	1475	0.902078		PRDM2_e4_104.3	SET	1738	1811	0.869965
PRDM2_e5_153.4	SET	1327	1353	0.766706		PRDM2_e5_153.4	SET	1455	1498	0.880392
PRDM2_e5_153.5	SET	1671	1451	0.900289		PRDM2_e5_153.5	SET	1329	1831	0.657975
PRDM2_e6_63.3	SET	2107	1807	0.911644		PRDM2_e6_63.3	SET	1873	1792	0.947475
PRDM2_e6_63.7	SET	529	539	0.766556		PRDM2_e6_63.7	SET	554	439	1.14219
PRDM8_e8_135.1	SET	2160	2100	0.804229		PRDM8_e8_135.1	SET	2365	2401	0.893023
PRDM8_e8_135.11	SET	677	533	0.992045		PRDM8_e8_135.11	SET	682	681	0.907083
PRDM8_e8_135.12	SET	1449	1351	0.838433		PRDM8_e8_135.12	SET	1335	1666	0.72637
PRDM8_e9_190.13	SET	2072	1941	0.834634		PRDM8_e9_190.13	SET	1875	1939	0.876613
PRDM8_e9_190.8	SET	2625	1832	1.12028		PRDM8_e9_190.8	SET	2306	2455	0.851599
PRDM8_e9_190.9	SET	618	729	0.662372		PRDM8_e9_190.9	SET	591	625	0.856378
PRDM9_e10_135.11	SET	355	299	0.926252		PRDM9_e10_135.11	SET	340	258	1.19103
PRDM9_e8_158.10	SET	2344	2129	0.860853		PRDM9_e8_158.10	SET	2149	2175	0.895744
PRDM9_e8_158.18	SET	1977	1957	0.789858		PRDM9_e8_158.18	SET	1867	1943	0.871077
PRDM9_e8_158.7	SET	1527	1831	0.652037		PRDM9_e8_158.7	SET	1589	1819	0.791886
PRDM9_e9_68.4	SET	994	1067	0.728133		PRDM9_e9_68.4	SET	998	1276	0.708858
PRMT1_e4_73.0	RMT	1329	211	4.90843		PRMT1_e4_73.0	RMT	1312	61	19.2213
PRMT1_e4_73.6	RMT	1367	144	7.38516		PRMT1_e4_73.6	RMT	1264	47	23.9296
PRMT1_e4_73.7	RMT	1097	1101	0.778785		PRMT1_e4_73.7	RMT	997	1367	0.661038
PRMT1_e6_143.13	RMT	1335	173	6.00873		PRMT1_e6_143.13	RMT	1337	136	8.85714
PRMT1_e6_143.14	RMT	890	90	7.66825		PRMT1_e6_143.14	RMT	759	39	17.2497
PRMT2_e6_162.10	RMT	1065	1190	0.699558		PRMT2_e6_162.10	RMT	1037	958	0.980822
PRMT2_e6_162.11	RMT	1765	1418	0.973051		PRMT2_e6_162.11	RMT	1706	1868	0.827902
PRMT2_e6_162.8	RMT	1496	1061	1.10205		PRMT2_e6_162.8	RMT	1274	1043	1.10687
PRMT2_e7_165.10	RMT	1098	770	1.11424		PRMT2_e7_165.10	RMT	998	1168	0.774352
PRMT2_e7_165.12	RMT	525	544	0.753777		PRMT2_e7_165.12	RMT	598	531	1.01966
PRMT2_e7_165.21	RMT	906	855	0.828079		PRMT2_e7_165.21	RMT	831	750	1.0037
PRMT3_e10_100.0	RMT	1089	1227	0.693766		PRMT3_e10_100.0	RMT	1007	1406	0.64916
PRMT3_e10_100.1	RMT	1089	934	0.911222		PRMT3_e10_100.1	RMT	961	1173	0.742468
PRMT3_e10_100.2	RMT	1781	1912	0.728291		PRMT3_e10_100.2	RMT	1736	2387	0.659356
PRMT3_e9_122.3	RMT	859	850	0.789735		PRMT3_e9_122.3	RMT	834	1198	0.630911
PRMT3_e9_122.5	RMT	521	544	0.748034		PRMT3_e9_122.5	RMT	521	682	0.691933
PRMT3_e9_122.6	RMT	1055	1016	0.81158		PRMT3_e9_122.6	RMT	891	961	0.840103
PRMT5_e11_123.12	RMT	571	15	28.2993		PRMT5_e11_123.12	RMT	489	13	31.8907
PRMT5_e11_123.13	RMT	620	35	13.5529		PRMT5_e11_123.13	RMT	534	69	6.92801
PRMT5_e11_123.14	RMT	2137	100	16.5855		PRMT5_e11_123.14	RMT	1859	44	37.5451
PRMT5_e12_106.10	RMT	1995	295	5.27567		PRMT5_e12_106.10	RMT	1677	155	9.75563
PRMT5_e12_106.3	RMT	1255	101	9.64448		PRMT5_e12_106.3	RMT	1289	76	15.2011
PRMT5_e12_106.4	RMT	952	171	4.33477		PRMT5_e12_106.4	RMT	1086	97	10.0601
PRMT6_e1_281.34	RMT	1033	839	0.962145		PRMT6_e1_281.34	RMT	944	757	1.12965
PRMT6_e1_281.50	RMT	581	428	1.05985		PRMT6_e1_281.50	RMT	467	496	0.852373
PRMT6_e1_281.6	RMT	651	447	1.13716		PRMT6_e1_281.6	RMT	532	629	0.76599
PRMT7_e5_73.0	RMT	834	878	0.742321		PRMT7_e5_73.0	RMT	761	759	0.908264
PRMT7_e5_73.1	RMT	983	1035	0.742321		PRMT7_e5_73.1	RMT	1000	940	0.96392
PRMT7_e5_73.2	RMT	1100	695	1.23659		PRMT7_e5_73.2	RMT	976	646	1.36835
PRMT7_e6_79.2	RMT	2009	1764	0.890421		PRMT7_e6_79.2	RMT	1860	1826	0.923388
PRMT7_e6_79.3	RMT	757	613	0.964691		PRMT7_e6_79.3	RMT	703	557	1.14283
PRMT8_e3_68.3	RMT	1025	831	0.963876		PRMT8_e3_68.3	RMT	751	844	0.806155
PRMT8_e3_68.8	RMT	1432	1261	0.887698		PRMT8_e3_68.8	RMT	1414	1537	0.833887
PRMT8_e4_64.0	RMT	1790	1809	0.77363		PRMT8_e4_64.0	RMT	1801	1997	0.817572
PRMT8_e4_64.1	RMT	1914	2089	0.716387		PRMT8_e4_64.1	RMT	1942	1808	0.97369
PRMT8_e4_64.2	RMT	615	645	0.744896		PRMT8_e4_64.2	RMT	632	1186	0.482934
PRMT8_e5_143.10	RMT	1096	913	0.938155		PRMT8_e5_143.10	RMT	963	1146	0.761528
PRMT8_e5_143.11	RMT	1814	1675	0.846694		PRMT8_e5_143.11	RMT	1544	1647	0.849772
PRMT8_e5_143.13	RMT	1258	1016	0.967742		PRMT8_e5_143.13	RMT	1088	1406	0.701377
PRMT9_e4_168.0	RMT	1734	1515	0.894786		PRMT9_e4_168.0	RMT	1608	1670	0.872814
PRMT9_e4_168.4	ATPase	2588	2337	0.865898		PRMT9_e4_168.4	ATPase	2414	2157	1.01459
PRMT9_e4_168.5	ATPase	2149	1763	0.953012		PRMT9_e4_168.5	ATPase	1861	2024	0.833545
PRMT9_e4_168.6	ATPase	896	909	0.770331		PRMT9_e4_168.6	ATPase	949	976	0.88105
PRMT9_e4_168.7	ATPase	877	670	1.02264		PRMT9_e4_168.7	ATPase	923	1018	0.82159
RAD54L_D_e7_237.21	ATPase	2378	1782	1.04333		RAD54L_D_e7_237.21	ATPase	2201	1721	1.15931
RAD54L_D_e8_125.10	ATPase	663	564	0.918204		RAD54L_D_e8_125.10	ATPase	653	464	1.2739
RAD54L_D_e9_95.6	ATPase	497	381	1.01823		RAD54L_D_e9_95.6	ATPase	481	428	1.01711
RAD54L_H_e14_124.7	ATPase	1841	1318	1.09191		RAD54L_H_e14_124.7	ATPase	1927	1929	0.905593
RAD54L_H_e15_79.0	ATPase	1882	1221	1.20485		RAD54L_H_e15_79.0	ATPase	1801	1397	1.16849
RAD54L_H_e16_180.9	ATPase	1018	869	0.91547		RAD54L_H_e16_180.9	ATPase	1019	1162	0.794725
RAD54L2_D_e10_135.5	ATPase	985	844	0.912007		RAD54L2_D_e10_135.5	ATPase	836	854	0.886901
RAD54L2_D_e7_118.9	ATPase	2076	1654	0.981281		RAD54L2_D_e7_118.9	ATPase	1975	1835	0.975673
RAD54L2_D_e8_134.9	ATPase	629	529	0.928667		RAD54L2_D_e8_134.9	ATPase	607	551	0.997495
RAD54L2_D_e9_197.16	ATPase	2042	2093	0.762836		RAD54L2_D_e9_197.16	ATPase	1931	2097	0.834803
RAD54L2_H_e13_119.0	neg_control	1315	952	1.07954		RAD54L2_H_e13_119.0	neg_control	1116	882	1.1464
RAD54L2_H_e14_119.4	positive _control	596	677	0.687801		RAD54L2_H_e14_119.4	positive _control	539	647	0.754508
RAD54L2_H_e15_100.9	positive _control	1793	1532	0.914969		RAD54L2_H_e15_100.9	positive _control	1824	1540	1.07358
RAD54L2_H_e16_135.7	positive _control	1325	837	1.23706		RAD54L2_H_e16_135.7	positive _control	1365	944	1.31018
Rosa26	positive _control	907	761	0.931286		Rosa26	positive _control	653	3838	0.154274
RPA3_e1.1	positive _control	1217	103	9.17222		RPA3_e1.1	positive _control	1148	67	15.3326
RPA3_e1.2	positive _control	2045	174	9.15172		RPA3_e1.2	positive _control	1860	116	14.4298
RPA3_e1.3	positive _control	415	45	7.0902		RPA3_e1.3	positive _control	366	389	0.851349
RPA3_e2.1	positive _control	558	121	3.58391		RPA3_e2.1	positive _control	586	130	4.05997
RPL23A_e2.1	positive _control	3610	4000	0.70578		RPL23A_e2.1	positive _control	3476	3994	0.789152
RPL23A_e2.2	positive _control	1017	50	15.6645		RPL23A_e2.2	positive _control	912	21	37.7573
RPL23A_e3.1	positive _control	1172	57	15.865		RPL23A_e3.1	positive _control	1025	72	12.751
RPL9_e3.1	RMT	1237	221	4.36264		RPL9_e3.1	RMT	1239	270	4.148
RPL9_e3.2	RMT	932	102	7.09259		RPL9_e3.2	RMT	954	120	7.15624
RPL9_e4.1	RMT	690	29	18.1217		RPL9_e4.1	RMT	588	0	588
RPL9_e4.2	RMT	873	23	28.7124		RPL9_e4.2	RMT	798	46	15.4296
SCRAP_D_e14_137.13	ATPase	1343	54	19.1754		SCRAP_D_e14_137.13	ATPase	1304	27	42.3792
SCRAP_D_e14_137.15	ATPase	696	119	4.54489		SCRAP_D_e14_137.15	ATPase	614	92	5.99388
SCRAP_D_e15_170.7	ATPase	690	53	10.035		SCRAP_D_e15_170.7	ATPase	566	75	6.76274
SCRAP_D_e15_170.8	ATPase	391	99	3.065		SCRAP_D_e15_170.8	ATPase	340	100	3.05595
SCRAP_H_e28_170.10	ATPase	707	137	4.01359		SCRAP_H_e28_170.10	ATPase	768	107	6.45505
SCRAP_H_e29_197.18	ATPase	578	49	9.08156		SCRAP_H_e29_197.18	ATPase	497	62	7.16548
SETD1A_e17_120.4	SET	886	299	2.31172		SETD1A_e17_120.4	SET	772	202	3.45071
SETD1A_e18_138.0	SET	390	98	3.08811		SETD1A_e18_138.0	SET	330	156	1.90748
SETD1A_e18_138.16	SET	898	433	1.61924		SETD1A_e18_138.16	SET	973	308	2.85675
SETD1A_e18_138.17	SET	1560	476	2.55924		SETD1A_e18_138.17	SET	1382	313	3.99296
SETD1A_e19_118.2	SET	532	317	1.30945		SETD1A_e19_118.2	SET	466	293	1.43802
SETD1A_e19_118.5	SET	5460	2263	1.88653		SETD1A_e19_118.5	SET	5390	1626	3.00479
SETD1A_e19_118.6	SET	2839	1078	2.05844		SETD1A_e19_118.6	SET	3053	844	3.27722
SETD1B_e15_95.7	SET	631	413	1.19279		SETD1B_e15_95.7	SET	541	396	1.23622
SETD1B_e16_138.10	SET	2077	1456	1.11519		SETD1B_e16_138.10	SET	1674	1205	1.25901
SETD1B_e16_138.11	SET	1037	135	5.97369		SETD1B_e16_138.11	SET	1001	67	13.3693
SETD1B_e16_138.9	SET	1361	970	1.09659		SETD1B_e16_138.9	SET	1176	887	1.20123
SETD1B_e17_118.1	SET	1443	834	1.35207		SETD1B_e17_118.1	SET	1409	781	1.63434
SETD1B_e17_118.2	SET	1543	1016	1.18698		SETD1B_e17_118.2	SET	1372	888	1.39986
SETD1B_e17_118.3	SET	2218	1340	1.29393		SETD1B_e17_118.3	SET	2009	1257	1.4485
SETD2_e5_124.1	SET	2387	1065	1.75182		SETD2_e5_124.1	SET	2325	1010	2.08593
SETD2_e5_124.2	SET	435	251	1.35136		SETD2_e5_124.2	SET	448	152	2.65729
SETD2_e5_124.5	SET	1253	608	1.60989		SETD2_e5_124.5	SET	1113	699	1.44226
SETD2_e6_78.0	SET	1090	692	1.23066		SETD2_e6_78.0	SET	1157	632	1.65799
SETD2_e7_98.0	SET	1738	817	1.66234		SETD2_e7_98.0	SET	1729	809	1.93619
SETD2_e7_98.2	SET	2889	1457	1.55011		SETD2_e7_98.2	SET	2563	1408	1.64989
SETD2_e7_98.3	SET	1637	821	1.55811		SETD2_e7_98.3	SET	1462	782	1.69366
SETD4_e6_175.12	SET	763	787	0.757574		SETD4_e6_175.12	SET	729	870	0.759178
SETD4_e6_175.16	SET	1411	1525	0.723338		SETD4_e6_175.16	SET	1346	1471	0.829378
SETD4_e6_175.19	SET	481	482	0.779293		SETD4_e6_175.19	SET	406	639	0.575436
SETD4_e7_103.0	SET	1154	1234	0.731008		SETD4_e7_103.0	SET	1076	1122	0.869073
SETD4_e7_103.2	SET	1706	1541	0.865491		SETD4_e7_103.2	SET	1465	1592	0.834132
SETD5_e10_118.2	SET	2719	2330	0.912461		SETD5_e10_118.2	SET	2504	2498	0.908808
SETD5_e10_118.4	SET	2926	2651	0.863064		SETD5_e10_118.4	SET	2566	2710	0.858479
SETD5_e10_118.5	SET	1155	1075	0.839778		SETD5_e10_118.5	SET	995	1095	0.82345
SETD5_e11_110.0	SET	2544	2671	0.744771		SETD5_e11_110.0	SET	2750	2755	0.905015
SETD5_e11_110.1	SET	1394	1300	0.838233		SETD5_e11_110.1	SET	1508	1424	0.959848
SETD5_e9_105.1	SET	450	393	0.893847		SETD5_e9_105.1	SET	415	268	1.3997
SETD5_e9_105.2	SET	507	358	1.10531		SETD5_e9_105.2	SET	468	405	1.0457
SETD6_e4_118.10	SET	806	363	1.73301		SETD6_e4_118.10	SET	726	439	1.4968
SETD6_e4_118.16	SET	2248	2231	0.787864		SETD6_e4_118.16	SET	2167	1989	0.987675
SETD6_e4_118.19	SET	1437	1325	0.847796		SETD6_e4_118.19	SET	1430	1397	0.927781
SETD6_e5_121.11	SET	1318	1227	0.839655		SETD6_e5_121.11	SET	1095	1357	0.731361
SETD6_e5_121.2	SET	511	487	0.819411		SETD6_e5_121.2	SET	452	460	0.889432
SETD6_e5_121.3	SET	835	948	0.688378		SETD6_e5_121.3	SET	833	1162	0.649663
SETD6_e6_67.6	SET	2154	2142	0.786275		SETD6_e6_67.6	SET	2094	1799	1.05515
SETD7_e6_86.0	SET	1746	1706	0.800153		SETD7_e6_86.0	SET	1763	1720	0.929143
SETD7_e6_86.1	SET	886	701	0.987502		SETD7_e6_86.1	SET	700	717	0.884337
SETD7_e6_86.2	SET	512	430	0.929649		SETD7_e6_86.2	SET	523	478	0.990463
SETD7_e7_158.10	SET	1433	1298	0.863012		SETD7_e7_158.10	SET	1272	1341	0.859711
SETD7_e7_158.11	SET	1713	1769	0.757084		SETD7_e7_158.11	SET	1648	1694	0.881859
SETD7_e7_158.13	SET	401	375	0.83467		SETD7_e7_158.13	SET	362	627	0.522879
SETD7_e8_95.11	SET	1114	1032	0.843691		SETD7_e8_95.11	SET	997	1236	0.731048
SETD7_e8_95.12	SET	1536	1335	0.89942		SETD7_e8_95.12	SET	1409	1550	0.823973
SETD7_e8_95.8	SET	1282	1101	0.910121		SETD7_e8_95.8	SET	1161	989	1.06372
SETD8_e7_190.11	SET	427	10	30.9762		SETD8_e7_190.11	SET	317	9	29.0206
SETD8_e7_190.14	SET	1222	998	0.95699		SETD8_e7_190.14	SET	1070	1064	0.911297
SETD8_e7_190.18	SET	1360	15	67.4029		SETD8_e7_190.18	SET	1223	59	18.5156
SETD8_e8_158.0	SET	832	2	233.908		SETD8_e8_158.0	SET	712	11	54.2334
SETD8_e8_158.5	SET	1017	82	9.60928		SETD8_e8_158.5	SET	772	107	6.48867
SETDB1_e20_55.0	SET	1532	680	1.76018		SETDB1_e20_55.0	SET	1411	602	2.12258
SETDB1_e20_55.1	SET	1083	251	3.36442		SETDB1_e20_55.1	SET	816	307	2.40358
SETDB1_e20_55.3	SET	1181	324	2.84423		SETDB1_e20_55.3	SET	985	395	2.25648
SETDB1_e21_89.0	SET	2333	898	2.03033		SETDB1_e21_89.0	SET	2327	975	2.1626
SETDB1_e21_89.8	SET	1464	458	2.49598		SETDB1_e21_89.8	SET	1468	421	3.15571
SETDB1_e21_89.9	SET	784	218	2.80292		SETDB1_e21_89.9	SET	681	270	2.27989
SETDB1_e22_45.0	SET	2818	859	2.56365		SETDB1_e22_45.0	SET	2764	1023	2.4483
SETDB1_e22_45.1	SET	1559	447	2.72324		SETDB1_e22_45.1	SET	1597	487	2.96863
SETDB1_e22_45.2	SET	899	1020	0.688864		SETDB1_e22_45.2	SET	822	1060	0.70272
SETDB2_e13_63.1	SET	1261	1290	0.764133		SETDB2_e13_63.1	SET	1211	1438	0.763307
SETDB2_e14_89.3	SET	2129	1932	0.861588		SETDB2_e14_89.3	SET	1909	1869	0.925921
SETDB2_e14_89.4	SET	848	694	0.954671		SETDB2_e14_89.4	SET	790	990	0.723073
SETDB2_e14_89.5	SET	1479	1510	0.765725		SETDB2_e14_89.5	SET	1554	1394	1.0104
SETMAR_e2_380.19	SET	1852	1710	0.846746		SETMAR_e2_380.19	SET	1583	1550	0.925727
SETMAR_e2_380.24	SET	1824	1690	0.843809		SETMAR_e2_380.24	SET	1604	1791	0.811852
SETMAR_e2_380.25	SET	1150	1107	0.811989		SETMAR_e2_380.25	SET	1088	1052	0.937188
SETMAR_e2_380.4	SET	1519	1251	0.949152		SETMAR_e2_380.4	SET	1245	1548	0.729007
SETMAR_e2_380.5	SET	1563	1666	0.733478		SETMAR_e2_380.5	SET	1432	1733	0.74904
SHPRH_H_e26_93.1	ATPase	442	362	0.952978		SHPRH_H_e26_93.1	ATPase	488	323	1.36643
SHPRH_H_e26_93.4	ATPase	863	841	0.801896		SHPRH_H_e26_93.4	ATPase	750	707	0.960888
SHPRH_H_e26_93.5	ATPase	883	789	0.874501		SHPRH_H_e26_93.5	ATPase	910	912	0.904071
SHPRH_H_e27_179.10	ATPase	2048	1941	0.824966		SHPRH_H_e27_179.10	ATPase	2152	2218	0.879612
SHPRH_H_e27_179.16	ATPase	2621	2450	0.836506		SHPRH_H_e27_179.16	ATPase	2692	2879	0.847782
SHPRH_H_e27_179.9	ATPase	1303	1235	0.824725		SHPRH_H_e27_179.9	ATPase	1562	1181	1.19863
SIRT1_e4_153.5	hydroxylase	1592	1657	0.751143		SIRT1_e4_153.5	hydroxylase	1500	1680	0.809348
SIRT1_e4_153.6	hydroxylase	696	722	0.753197		SIRT1_e4_153.6	hydroxylase	617	829	0.674285
SIRT1_e5_148.2	hydroxylase	564	563	0.782482		SIRT1_e5_148.2	hydroxylase	574	563	0.923192
SIRT1_e5_148.3	hydroxylase	623	453	1.07386		SIRT1_e5_148.3	hydroxylase	771	633	1.1031
SIRT1_e6_80.0	hydroxylase	741	828	0.699334		SIRT1_e6_80.0	hydroxylase	762	882	0.782759
SIRT1_e7_187.11	hydroxylase	606	508	0.931639		SIRT1_e7_187.11	hydroxylase	604	547	0.999811
SIRT1_e7_187.14	hydroxylase	1030	840	0.95821		SIRT1_e7_187.14	hydroxylase	998	1021	0.885741
SIRT2_e10_60.1	hydroxylase	630	437	1.12561		SIRT2_e10_60.1	hydroxylase	585	640	0.827844
SIRT2_e11_56.0	hydroxylase	335	179	1.45749		SIRT2_e11_56.0	hydroxylase	393	271	1.31087
SIRT2_e12_77.3	hydroxylase	1777	1435	0.968067		SIRT2_e12_77.3	hydroxylase	1574	1499	0.951762
SIRT2_e13_52.4	hydroxylase	440	342	1.00402		SIRT2_e13_52.4	hydroxylase	431	461	0.846273
SIRT2_e14_70.3	hydroxylase	688	583	0.921816		SIRT2_e14_70.3	hydroxylase	500	512	0.884136
SIRT2_e6_107.11	hydroxylase	1282	894	1.12067		SIRT2_e6_107.11	hydroxylase	1064	923	1.04448
SIRT2_e7_57.7	hydroxylase	533	715	0.582443		SIRT2_e7_57.7	hydroxylase	547	497	0.996384
SIRT2_e8_69.0	hydroxylase	1415	1373	0.805648		SIRT2_e8_69.0	hydroxylase	1369	1176	1.05499
SIRT2_e9_130.10	hydroxylase	553	458	0.942813		SIRT2_e9_130.10	hydroxylase	553	456	1.0977
SIRT3_e3_210.0	hydroxylase	857	906	0.739239		SIRT3_e3_210.0	hydroxylase	824	885	0.843581
SIRT3_e3_210.28	hydroxylase	865	880	0.768165		SIRT3_e3_210.28	hydroxylase	831	1190	0.632865
SIRT3_e4_101.10	hydroxylase	1143	1206	0.740839		SIRT3_e4_101.10	hydroxylase	1188	1401	0.768573
SIRT3_e5_162.21	hydroxylase	522	622	0.655603		SIRT3_e5_162.21	hydroxylase	486	553	0.795769
SIRT3_e6_158.32	hydroxylase	942	713	1.03227		SIRT3_e6_158.32	hydroxylase	912	1001	0.825572
SIRT4_e2_341.15	hydroxylase	758	592	1.00019		SIRT4_e2_341.15	hydroxylase	693	804	0.780864
SIRT4_e2_341.60	hydroxylase	1039	769	1.05573		SIRT4_e2_341.60	hydroxylase	1009	872	1.04836
SIRT4_e3_210.14	hydroxylase	2321	1794	1.01151		SIRT4_e3_210.14	hydroxylase	1866	1946	0.869269
SIRT4_e3_210.19	hydroxylase	374	246	1.1854		SIRT4_e3_210.19	hydroxylase	266	246	0.977093
SIRT4_e4_158.10	hydroxylase	832	499	1.30211		SIRT4_e4_158.10	hydroxylase	789	499	1.43145
SIRT4_e4_158.9	hydroxylase	784	525	1.16632		SIRT4_e4_158.9	hydroxylase	648	529	1.10908
SIRT5_e5_210.25	hydroxylase	896	802	0.873006		SIRT5_e5_210.25	hydroxylase	709	821	0.782368
SIRT5_e5_210.7	hydroxylase	1108	850	1.01866		SIRT5_e5_210.7	hydroxylase	917	823	1.00944
SIRT5_e6_88.0	hydroxylase	1378	1071	1.00566		SIRT5_e6_88.0	hydroxylase	1128	1405	0.72768
SIRT5_e7_54.0	hydroxylase	953	874	0.852118		SIRT5_e7_54.0	hydroxylase	935	900	0.941281
SIRT5_e8_124.3	hydroxylase	1163	1130	0.804466		SIRT5_e8_124.3	hydroxylase	1171	1574	0.674357
SIRT5_e9_116.7	hydroxylase	1502	1121	1.04729		SIRT5_e9_116.7	hydroxylase	1366	1686	0.734425
SIRT6_e3_183.25	hydroxylase	1677	1447	0.906018		SIRT6_e3_183.25	hydroxylase	1447	1499	0.874968
SIRT6_e3_183.4	hydroxylase	785	753	0.814574		SIRT6_e3_183.4	hydroxylase	831	827	0.910348
SIRT6_e4_60.2	hydroxylase	1794	1438	0.975291		SIRT6_e4_60.2	hydroxylase	1602	1338	1.08518
SIRT6_e4_60.3	hydroxylase	2086	1623	1.00483		SIRT6_e4_60.3	hydroxylase	1901	1555	1.10812
SIRT6_e5_96.0	hydroxylase	4168	3345	0.974399		SIRT6_e5_96.0	hydroxylase	3808	3384	1.02032
SIRT6_e5_96.1	hydroxylase	2293	1766	1.01514		SIRT6_e5_96.1	hydroxylase	2127	1729	1.11515
SIRT6_e6_81.6	hydroxylase	950	665	1.11609		SIRT6_e6_81.6	hydroxylase	808	784	0.933643
SIRT6_e6_81.7	hydroxylase	614	889	0.539748		SIRT6_e6_81.7	hydroxylase	722	856	0.764172
SIRT6_e7_124.0	hydroxylase	1244	1042	0.933111		SIRT6_e7_124.0	hydroxylase	1062	855	1.12535
SIRT6_e7_124.20	hydroxylase	540	394	1.0699		SIRT6_e7_124.20	hydroxylase	423	412	0.929129
SIRT7_e4_70.10	hydroxylase	939	651	1.12686		SIRT7_e4_70.10	hydroxylase	797	944	0.764992
SIRT7_e4_70.2	hydroxylase	572	377	1.1843		SIRT7_e4_70.2	hydroxylase	442	473	0.845896
SIRT7_e5_73.1	hydroxylase	2245	1349	1.30095		SIRT7_e5_73.1	hydroxylase	2000	1604	1.13023
SIRT7_e5_73.8	hydroxylase	1085	780	1.08694		SIRT7_e5_73.8	hydroxylase	1062	915	1.05163
SIRT7_e6_99.10	hydroxylase	834	856	0.761382		SIRT7_e6_99.10	hydroxylase	782	973	0.728244
SIRT7_e6_99.9	hydroxylase	698	428	1.27328		SIRT7_e6_99.9	hydroxylase	534	417	1.15891
SIRT7_e7_210.3	hydroxylase	464	340	1.065		SIRT7_e7_210.3	hydroxylase	468	477	0.888158
SIRT7_e7_210.4	hydroxylase	1194	921	1.01317		SIRT7_e7_210.4	hydroxylase	965	809	1.08064
SIRT7_e8_81.4	hydroxylase	926	819	0.883526		SIRT7_e8_81.4	hydroxylase	857	884	0.878357
SIRT7_e8_81.6	hydroxylase	1515	997	1.18764		SIRT7_e8_81.6	hydroxylase	1471	1308	1.01928
SMARCA2_BD_e28_218.0	BD	2038	1811	0.879843		SMARCA2_BD_e28_218.0	BD	1924	1901	0.917495
SMARCA2_BD_e28_218.15	BD	485	524	0.722885		SMARCA2_BD_e28_218.15	BD	383	510	0.6799
SMARCA2_BD_e28_218.19	BD	1696	1684	0.787388		SMARCA2_BD_e28_218.19	BD	1470	1775	0.750732
SMARCA2_BD_e29_54.0	BD	2031	1900	0.835765		SMARCA2_BD_e29_54.0	BD	2099	2224	0.855635
SMARCA2_BD_e29_54.2	BD	745	828	0.703109		SMARCA2_BD_e29_54.2	BD	673	847	0.719871
SMARCA2_BD_e29_54.3	BD	1894	1791	0.826802		SMARCA2_BD_e29_54.3	BD	1732	1744	0.900251
SMARCA2_D_e15_118.0	ATPase	954	880	0.847201		SMARCA2_D_e15_118.0	ATPase	895	1026	0.79046
SMARCA2_D_e16_67.2	ATPase	2591	2374	0.853396		SMARCA2_D_e16_67.2	ATPase	2416	2902	0.754834
SMARCA2_D_e17_111.10	ATPase	302	301	0.782745		SMARCA2_D_e17_111.10	ATPase	302	351	0.778336
SMARCA2_D_e18_135.13	ATPase	1987	1793	0.866433		SMARCA2_D_e18_135.13	ATPase	1683	1893	0.80596
SMARCA2_H_e23_167.0	ATPase	1007	926	0.849882		SMARCA2_H_e23_167.0	ATPase	908	1108	0.74264
SMARCA2_H_e24_164.7	ATPase	737	790	0.728983		SMARCA2_H_e24_164.7	ATPase	676	991	0.618107
SMARCA2_H_e25_59.1	ATPase	971	642	1.18158		SMARCA2_H_e25_59.1	ATPase	838	629	1.20658
SMARCA4_BD_e31_52.1	BD	1406	1465	0.750279		SMARCA4_BD_e31_52.1	BD	1203	1017	1.07188
SMARCA4_BD_e32_109.6	BD	1176	847	1.085		SMARCA4_BD_e32_109.6	BD	1169	1029	1.02945
SMARCA4_BD_e32_109.8	BD	2624	1935	1.06026		SMARCA4_BD_e32_109.8	BD	2316	1864	1.12634
SMARCA4_BD_e32_109.9	BD	1828	1052	1.35814		SMARCA4_BD_e32_109.9	BD	1576	1226	1.16502
SMARCA4_BD_e33_102.10	BD	2616	2121	0.96437		SMARCA4_BD_e33_102.10	BD	2357	1988	1.07481
SMARCA4_BD_e33_102.5	BD	989	696	1.11021		SMARCA4_BD_e33_102.5	BD	992	674	1.33308
SMARCA4_BD_e33_102.8	BD	2657	2426	0.856382		SMARCA4_BD_e33_102.8	BD	2454	2561	0.868758
SMARCA4_BD_e34_59.1	BD	908	600	1.18216		SMARCA4_BD_e34_59.1	BD	833	582	1.29609
SMARCA4_BD_e34_59.2	BD	741	656	0.882477		SMARCA4_BD_e34_59.2	BD	851	475	1.62179
SMARCAD1_D_e12_100.3	ATPase	716	770	0.726588		SMARCAD1_D_e12_100.3	ATPase	744	733	0.919432
SMARCAD1_D_e13_60.1	ATPase	2455	2645	0.725779		SMARCAD1_D_e13_60.1	ATPase	2254	2828	0.722642
SMARCAD1_D_e15_136.0	ATPase	772	789	0.764569		SMARCAD1_D_e15_136.0	ATPase	811	627	1.17142
SMARCAD1_H_e21_119.0	ATPase	1066	973	0.856253		SMARCAD1_H_e21_119.0	ATPase	1062	1350	0.712996
SMARCAD1_H_e22_183.0	ATPase	1416	1470	0.753046		SMARCAD1_H_e22_183.0	ATPase	1481	1491	0.900329
SMARCAL1_D_e10_66.2	ATPase	338	276	0.95518		SMARCAL1_D_e10_66.2	ATPase	304	304	0.904261
SMARCAL1_D_e8_135.4	ATPase	1747	1515	0.901494		SMARCAL1_D_e8_135.4	ATPase	1548	1692	0.829327
SMARCAL1_D_e9_159.0	ATPase	904	664	1.06364		SMARCAL1_D_e9_159.0	ATPase	855	857	0.903886
SMARCAL1_H_e14_103.5	ATPase	469	459	0.797861		SMARCAL1_H_e14_103.5	ATPase	522	526	0.898513
SMARCAL1_H_e15_183.0	ATPase	1640	1168	1.09753		SMARCAL1_H_e15_183.0	ATPase	1541	1115	1.25246
SMARCAL1_H_e16_50.0	ATPase	1435	897	1.25022		SMARCAL1_H_e16_50.0	ATPase	1353	909	1.34862
SMYD1_e4_86.3	SET	909	628	1.13076		SMYD1_e4_86.3	SET	800	603	1.20146
SMYD1_e4_86.7	SET	1510	1195	0.987715		SMYD1_e4_86.7	SET	1553	1297	1.08521
SMYD1_e6_73.0	SET	1856	1529	0.948976		SMYD1_e6_73.0	SET	1755	1767	0.900338
SMYD1_e6_73.3	SET	840	483	1.35811		SMYD1_e6_73.3	SET	909	837	0.983911
SMYD2_e6_55.0	SET	2549	2209	0.90225		SMYD2_e6_55.0	SET	2162	2734	0.71697
SMYD2_e7_103.5	SET	360	297	0.945607		SMYD2_e7_103.5	SET	370	318	1.05227
SMYD2_e7_103.9	SET	4241	3245	1.02201		SMYD2_e7_103.9	SET	3932	3430	1.03942
SMYD3_e5_95.2	SET	1190	1106	0.840991		SMYD3_e5_95.2	SET	1229	1194	0.932837
SMYD3_e5_95.3	SET	485	532	0.712031		SMYD3_e5_95.3	SET	534	569	0.849816
SMYD3_e6_68.1	SET	227	248	0.713696		SMYD3_e6_68.1	SET	231	258	0.8092
SMYD3_e6_68.3	SET	1143	880	1.01504		SMYD3_e6_68.3	SET	779	1061	0.665333
SMYD3_e6_68.4	SET	1720	1752	0.767551		SMYD3_e6_68.4	SET	1475	1624	0.823287
SMYD3_e7_103.2	SET	1728	1563	0.864319		SMYD3_e7_103.2	SET	1591	1874	0.769623
SMYD3_e7_103.4	SET	970	911	0.832123		SMYD3_e7_103.4	SET	871	1129	0.699139
SMYD3_e7_103.7	SET	1466	1383	0.828654		SMYD3_e7_103.7	SET	1326	1491	0.806101
SMYD4_e5_95.0	SET	2889	2856	0.791001		SMYD4_e5_95.0	SET	2749	3022	0.824779
SMYD4_e5_95.4	SET	415	280	1.15607		SMYD4_e5_95.4	SET	358	390	0.83061
SMYD4_e5_95.5	SET	878	889	0.771823		SMYD4_e5_95.5	SET	808	900	0.813428
SMYD4_e6_183.0	SET	830	679	0.955026		SMYD4_e6_183.0	SET	756	786	0.871337
SMYD4_e6_183.6	SET	1286	1326	0.758138		SMYD4_e6_183.6	SET	1242	1635	0.688574
SMYD4_e6_183.9	SET	986	1065	0.723628		SMYD4_e6_183.9	SET	809	1124	0.652258
SMYD5_SET1_e10_57.0	SET	911	763	0.932944		SMYD5_SET1_e10_57.0	SET	874	554	1.4285
SMYD5_SET1_e10_57.1	SET	816	509	1.25202		SMYD5_SET1_e10_57.1	SET	742	829	0.810891
SMYD5_SET1_e10_57.2	SET	426	364	0.913446		SMYD5_SET1_e10_57.2	SET	480	394	1.10239
SMYD5_SET1_e11_95.0	SET	415	285	1.13585		SMYD5_SET1_e11_95.0	SET	334	313	0.965013
SMYD5_SET1_e11_95.2	SET	297	252	0.919003		SMYD5_SET1_e11_95.2	SET	319	314	0.918748
SMYD5_SET1_e11_95.9	SET	1593	1246	0.999383		SMYD5_SET1_e11_95.9	SET	1479	1389	0.965095
SMYD5_SET1_e2__73.5	SET	609	486	0.978564		SMYD5_SET1_e2__73.5	SET	583	495	1.06624
SMYD5_SET1_e2__73.6	SET	511	363	1.09872		SMYD5_SET1_e2__73.6	SET	377	435	0.784396
SMYD5_SET1_e2__73.8	SET	1541	975	1.23525		SMYD5_SET1_e2__73.8	SET	1396	1082	1.16918
SP100_BD_e27_72.1	BD	1024	823	0.972287		SP100_BD_e27_72.1	BD	888	947	0.84964
SP100_BD_e27_72.2	BD	1264	1323	0.746857		SP100_BD_e27_72.2	BD	1186	1229	0.874581
SP100_BD_e28_144.1	BD	1408	1486	0.740734		SP100_BD_e28_144.1	BD	1251	1598	0.709614
SP100_BD_e28_144.2	BD	816	1184	0.538714		SP100_BD_e28_144.2	BD	810	971	0.755872
SP100_BD_e28_144.3	BD	559	508	0.859383		SP100_BD_e28_144.3	BD	491	498	0.892585
SP100_BD_e29_79.0	BD	1133	1072	0.826086		SP100_BD_e29_79.0	BD	914	1338	0.619132
SP100_BD_e29_79.3	BD	2068	1753	0.92232		SP100_BD_e29_79.3	BD	1766	2060	0.777177
SP140_BD_e27_79.3	BD	1476	1223	0.943385		SP140_BD_e27_79.3	BD	1394	1411	0.895456
SP140L_BD_e19_73.2	BD	793	639	0.9695		SP140L_BD_e19_73.2	BD	716	799	0.811823
SUV39H1_e3_105.1	SET	628	568	0.863615		SUV39H1_e3_105.1	SET	586	666	0.79693
SUV39H1_e3_105.10	SET	1590	1157	1.07418		SUV39H1_e3_105.10	SET	1456	1300	1.01509
SUV39H1_e3_105.3	SET	677	574	0.921281		SUV39H1_e3_105.3	SET	694	746	0.842715
SUV39H1_e4_147.19	SET	378	357	0.82638		SUV39H1_e4_147.19	SET	347	428	0.73376
SUV39H1_e4_147.4	SET	2371	2012	0.921386		SUV39H1_e4_147.4	SET	2180	1915	1.03198
SUV39H1_e4_147.5	SET	1507	1317	0.894492		SUV39H1_e4_147.5	SET	1372	1247	0.997148
SUV39H1_e5_130.10	SET	510	545	0.730899		SUV39H1_e5_130.10	SET	421	418	0.911491
SUV39H1_e5_130.11	SET	1215	860	1.10405		SUV39H1_e5_130.11	SET	1142	892	1.15997
SUV39H1_e5_130.3	SET	841	674	0.974853		SUV39H1_e5_130.3	SET	605	611	0.896722
SUV39H2_e3_105.1	SET	964	926	0.813591		SUV39H2_e3_105.1	SET	958	1109	0.782829
SUV39H2_e3_105.2	SET	1377	1173	0.9176		SUV39H2_e3_105.2	SET	1386	1598	0.786191
SUV39H2_e3_105.3	SET	808	629	1.00352		SUV39H2_e3_105.3	SET	765	866	0.800344
SUV39H2_e4_147.1	SET	1719	1662	0.808625		SUV39H2_e4_147.1	SET	1517	1802	0.763133
SUV39H2_e4_147.3	SET	764	656	0.909869		SUV39H2_e4_147.3	SET	810	1087	0.675276
SUV39H2_e4_147.6	SET	1439	1426	0.788878		SUV39H2_e4_147.6	SET	1509	1607	0.85117
SUV39H2_e5_130.0	SET	256	414	0.482755		SUV39H2_e5_130.0	SET	201	347	0.523987
SUV39H2_e5_130.5	SET	1360	1052	1.01043		SUV39H2_e5_130.5	SET	1392	1489	0.84736
SUV39H2_e5_130.6	SET	631	724	0.680971		SUV39H2_e5_130.6	SET	690	676	0.924502
SUV420H1_e6_45.0	SET	1682	2022	0.650405		SUV420H1_e6_45.0	SET	1814	1970	0.834755
SUV420H1_e7_167.4	SET	1103	878	0.98175		SUV420H1_e7_167.4	SET	1198	976	1.11222
SUV420H1_e7_167.5	SET	2077	1428	1.13704		SUV420H1_e7_167.5	SET	1822	1321	1.25007
SUV420H1_e7_167.7	SET	1198	1313	0.713247		SUV420H1_e7_167.7	SET	1208	1554	0.704612
SUV420H1_e9_105.0	SET	372	275	1.05508		SUV420H1_e9_105.0	SET	302	272	1.00364
SUV420H1_e9_105.1	SET	1048	631	1.29748		SUV420H1_e9_105.1	SET	885	814	0.98497
SUV420H1_e9_105.5	SET	1300	1040	0.97699		SUV420H1_e9_105.5	SET	1531	782	1.77359
SUV420H2_e5_164.12	SET	726	848	0.669032		SUV420H2_e5_164.12	SET	759	926	0.742666
SUV420H2_e5_164.16	SET	917	784	0.91396		SUV420H2_e5_164.16	SET	850	811	0.949512
SUV420H2_e5_164.18	SET	445	442	0.786098		SUV420H2_e5_164.18	SET	395	617	0.579778
SUV420H2_e7_105.13	SET	1817	1605	0.885065		SUV420H2_e7_105.13	SET	1583	1856	0.773176
SUV420H2_e7_105.8	SET	2499	2252	0.867668		SUV420H2_e7_105.8	SET	2367	2315	0.926968
SUV420H2_e7_105.9	SET	1015	1025	0.773958		SUV420H2_e7_105.9	SET	850	1153	0.668091
TAF1_BD1_e28_178.10	BD1	792	764	0.810017		TAF1_BD1_e28_178.10	BD1	720	608	1.07243
TAF1_BD1_e28_178.11	BD1	1128	244	3.60443		TAF1_BD1_e28_178.11	BD1	946	259	3.30112
TAF1_BD2_e31_93.0	BD2	1512	427	2.76462		TAF1_BD2_e31_93.0	BD2	1601	477	3.03834
TAF1_BD2_e32_85.3	BD2	1304	320	3.17961		TAF1_BD2_e32_85.3	BD2	1151	396	2.63011
TAF1_BD2_e33_68.0	BD2	959	45	16.3843		TAF1_BD2_e33_68.0	BD2	811	28	25.4452
TAF1_BD2_e33_68.1	BD2	1291	85	11.7716		TAF1_BD2_e33_68.1	BD2	1208	56	19.2526
TAF1_e13_174.15	AT	1997	789	1.97778		TAF1_e13_174.15	AT	1884	783	2.17974
TAF1_e15_201.1	AT	836	47	13.6851		TAF1_e15_201.1	AT	741	35	18.7166
TAF1_e15_201.13	AT	2184	476	3.58294		TAF1_e15_201.13	AT	1932	478	3.65884
TET1_e10_86.0	hydroxylase	375	506	0.578784		TET1_e10_86.0	hydroxylase	441	499	0.800087
TET1_e10_86.1	hydroxylase	559	376	1.16045		TET1_e10_86.1	hydroxylase	579	446	1.17503
TET1_e10_86.5	hydroxylase	259	203	0.994123		TET1_e10_86.5	hydroxylase	166	143	1.0462
TET1_e7_86.2	hydroxylase	1797	1720	0.816825		TET1_e7_86.2	hydroxylase	1548	1757	0.798662
TET1_e8_90.0	hydroxylase	1437	1189	0.944705		TET1_e8_90.0	hydroxylase	1346	1362	0.895708
TET1_e8_90.1	hydroxylase	1266	1003	0.986509		TET1_e8_90.1	hydroxylase	1235	1118	1.00106
TET1_e8_90.2	hydroxylase	1815	1487	0.95421		TET1_e8_90.2	hydroxylase	1657	1816	0.827137
TET1_e9_138.1	hydroxylase	1057	566	1.4587		TET1_e9_138.1	hydroxylase	1007	721	1.26513
TET1_e9_138.17	hydroxylase	2693	2399	0.877751		TET1_e9_138.17	hydroxylase	2694	2302	1.06098
TET1_e9_138.18	hydroxylase	1010	700	1.12731		TET1_e9_138.18	hydroxylase	949	739	1.16326
TET2_e10_86.0	hydroxylase	657	633	0.810834		TET2_e10_86.0	hydroxylase	638	649	0.890343
TET2_e10_86.1	hydroxylase	1172	1209	0.757752		TET2_e10_86.1	hydroxylase	1158	1144	0.917331
TET2_e10_86.3	hydroxylase	1633	1530	0.83441		TET2_e10_86.3	hydroxylase	1404	1672	0.761173
TET2_e7_86.0	hydroxylase	1290	1514	0.66611		TET2_e7_86.0	hydroxylase	1393	1684	0.74983
TET2_e7_86.2	hydroxylase	947	1107	0.668655		TET2_e7_86.2	hydroxylase	892	1238	0.653001
TET2_e7_86.3	hydroxylase	1017	885	0.898051		TET2_e7_86.3	hydroxylase	923	1111	0.752872
TET2_e8_90.0	hydroxylase	1938	1685	0.899206		TET2_e8_90.0	hydroxylase	1714	1959	0.793164
TET2_e8_90.2	hydroxylase	1445	1391	0.812088		TET2_e8_90.2	hydroxylase	1394	1544	0.818367
TET2_e8_90.3	hydroxylase	521	496	0.820311		TET2_e8_90.3	hydroxylase	503	462	0.985512
TET2_e9_138.0	hydroxylase	569	448	0.991707		TET2_e9_138.0	hydroxylase	502	426	1.06649
TET2_e9_138.1	hydroxylase	1002	972	0.805673		TET2_e9_138.1	hydroxylase	1023	1017	0.911497
TET2_e9_138.14	hydroxylase	882	876	0.786835		TET2_e9_138.14	hydroxylase	892	914	0.884251
TET3_e10_79.0	hydroxylase	365	275	1.03522		TET3_e10_79.0	hydroxylase	321	418	0.694985
TET3_e10_79.1	hydroxylase	567	476	0.930186		TET3_e10_79.1	hydroxylase	623	589	0.957839
TET3_e10_79.2	hydroxylase	2565	1925	1.04181		TET3_e10_79.2	hydroxylase	2190	1954	1.01603
TET3_e7_86.1	hydroxylase	794	659	0.941297		TET3_e7_86.1	hydroxylase	666	650	0.92799
TET3_e7_86.3	hydroxylase	1526	1193	0.999853		TET3_e7_86.3	hydroxylase	1430	1429	0.907018
TET3_e7_86.4	hydroxylase	3146	2159	1.13935		TET3_e7_86.4	hydroxylase	2952	2343	1.14226
TET3_e8_90.2	hydroxylase	475	515	0.720334		TET3_e8_90.2	hydroxylase	424	459	0.836149
TET3_e8_90.5	hydroxylase	2513	1547	1.26996		TET3_e8_90.5	hydroxylase	2309	1894	1.10516
TET3_e8_90.9	hydroxylase	1507	1219	0.966357		TET3_e8_90.9	hydroxylase	1293	948	1.23584
TET3_e9_138.0	hydroxylase	313	262	0.931655		TET3_e9_138.0	hydroxylase	266	419	0.574535
TET3_e9_138.1	hydroxylase	344	355	0.756277		TET3_e9_138.1	hydroxylase	432	360	1.08562
TET3_e9_138.2	hydroxylase	976	757	1.00742		TET3_e9_138.2	hydroxylase	957	919	0.94353
TIP60_e10_94.0	AT	1658	230	5.61939		TIP60_e10_94.0	AT	1475	200	6.65863
TIP60_e10_94.13	AT	1101	92	9.28174		TIP60_e10_94.13	AT	1014	77	11.8046
TIP60_e10_94.5	AT	930	61	11.7741		TIP60_e10_94.5	AT	806	15	45.9553
TIP60_e10_94.6	AT	1023	77	10.2873		TIP60_e10_94.6	AT	810	38	18.8819
TIP60_e10_94.8	AT	546	18	22.7381		TIP60_e10_94.8	AT	391	4	72.269
TRIM24_BD_e17_75.0	BD	613	627	0.763762		TRIM24_BD_e17_75.0	BD	672	559	1.08853
TRIM24_BD_e17_75.1	BD	284	313	0.707941		TRIM24_BD_e17_75.1	BD	319	226	1.27506
TRIM24_BD_e17_75.2	BD	1045	927	0.881002		TRIM24_BD_e17_75.2	BD	930	856	0.984322
TRIM24_BD_e18_150.2	BD	1254	1348	0.727214		TRIM24_BD_e18_150.2	BD	1158	1178	0.890875
TRIM24_BD_e18_150.4	BD	836	706	0.925183		TRIM24_BD_e18_150.4	BD	810	1043	0.703738
TRIM24_BD_e19_86.0	BD	403	414	0.759962		TRIM24_BD_e19_86.0	BD	424	430	0.892422
TRIM24_BD_e19_86.1	BD	731	765	0.746653		TRIM24_BD_e19_86.1	BD	819	955	0.777063
TRIM24_BD_e19_86.2	BD	1277	1091	0.914875		TRIM24_BD_e19_86.2	BD	1303	1150	1.02681
TRIM28_BD_e15_87.1	BD	378	298	0.989564		TRIM28_BD_e15_87.1	BD	407	298	1.23494
TRIM28_BD_e15_87.2	BD	942	916	0.803695		TRIM28_BD_e15_87.2	BD	803	893	0.814725
TRIM28_BD_e15_87.9	BD	946	1077	0.686542		TRIM28_BD_e15_87.9	BD	990	834	1.07544
TRIM28_BD_e16_138.19	BD	213	178	0.931885		TRIM28_BD_e16_138.19	BD	142	122	1.04785
TRIM28_BD_e16_138.20	BD	1000	815	0.95881		TRIM28_BD_e16_138.20	BD	850	918	0.838948
TRIM28_BD_e16_138.7	BD	2673	1632	1.28049		TRIM28_BD_e16_138.7	BD	2500	1876	1.20805
TRIM28_BD_e17_79.1	BD	1168	1069	0.853993		TRIM28_BD_e17_79.1	BD	875	889	0.891767
TRIM28_BD_e17_79.2	BD	189	191	0.770833		TRIM28_BD_e17_79.2	BD	186	183	0.917281
TRIM28_BD_e17_79.3	BD	566	301	1.467		TRIM28_BD_e17_79.3	BD	481	372	1.16986
TRIM33_BD_e17_75.0	BD	381	304	0.977782		TRIM33_BD_e17_75.0	BD	337	309	0.986248
TRIM33_BD_e17_75.1	BD	1399	909	1.20278		TRIM33_BD_e17_75.1	BD	1195	889	1.2179
TRIM33_BD_e17_75.2	BD	1301	914	1.11241		TRIM33_BD_e17_75.2	BD	1209	896	1.22255
TRIM33_BD_e18_153.13	BD	1843	1075	1.34001		TRIM33_BD_e18_153.13	BD	1571	1008	1.41225
TRIM33_BD_e18_153.5	BD	993	467	1.6604		TRIM33_BD_e18_153.5	BD	831	479	1.57048
TRIM33_BD_e18_153.8	BD	2036	1412	1.12722		TRIM33_BD_e18_153.8	BD	1843	1102	1.51556
TRIM33_BD_e20_79.0	BD	322	268	0.937049		TRIM33_BD_e20_79.0	BD	321	241	1.2035
TRIM66_BD_e17_75.0	BD	1284	1340	0.749055		TRIM66_BD_e17_75.0	BD	1273	1425	0.809702
TRIM66_BD_e17_75.1	BD	705	861	0.63988		TRIM66_BD_e17_75.1	BD	723	879	0.745228
TRIM66_BD_e17_75.4	BD	1272	1346	0.738748		TRIM66_BD_e17_75.4	BD	1107	1487	0.674776
TRIM66_BD_e18_153.17	BD	908	795	0.89248		TRIM66_BD_e18_153.17	BD	851	832	0.926661
TRIM66_BD_e18_153.20	BD	1549	1851	0.654287		TRIM66_BD_e18_153.20	BD	1497	2173	0.624552
TRIM66_BD_e18_153.3	BD	2610	2188	0.932706		TRIM66_BD_e18_153.3	BD	2311	2475	0.846552
TRIM66_BD_e19_79.5	BD	1086	1015	0.83625		TRIM66_BD_e19_79.5	BD	926	1254	0.669248
TRIM66_BD_e19_79.6	BD	1236	1392	0.694132		TRIM66_BD_e19_79.6	BD	1254	1460	0.778507
TRIM66_BD_e19_79.7	BD	1429	1422	0.785598		TRIM66_BD_e19_79.7	BD	1239	1523	0.737396
TTF2_D_e10_120.6	ATPase	1056	134	6.12827		TTF2_D_e10_120.6	ATPase	1127	43	23.2798
TTF2_D_e11_151.10	ATPase	1312	119	8.56739		TTF2_D_e11_151.10	ATPase	1244	97	11.5238
TTF2_D_e12_106.0	ATPase	760	54	10.8513		TTF2_D_e12_106.0	ATPase	710	12	49.891
TTF2_D_e13_158.13	ATPase	1001	26	29.2344		TTF2_D_e13_158.13	ATPase	1046	31	29.7327
TTF2_D_e20_151.8	ATPase	641	40	12.294		TTF2_D_e20_151.8	ATPase	510	16	27.3585
TTF2_D_e21_83.3	ATPase	1327	15	65.7674		TTF2_D_e21_83.3	ATPase	1143	58	17.5982
TTF2_D_e22_75.1	ATPase	954	53	13.8745		TTF2_D_e22_75.1	ATPase	949	77	11.0478
UTY_e25_115.1	hydroxylase	674	812	0.648623		UTY_e25_115.1	hydroxylase	725	882	0.744751
UTY_e25_115.4	hydroxylase	2551	2758	0.723269		UTY_e25_115.4	hydroxylase	2368	3249	0.660843
UTY_e25_115.5	hydroxylase	4667	5171	0.705837		UTY_e25_115.5	hydroxylase	4452	5704	0.707774
UTY_e25_115.6	hydroxylase	1573	1430	0.859928		UTY_e25_115.6	hydroxylase	1482	1622	0.828214
UTY_e25_115.7	hydroxylase	1553	1825	0.665318		UTY_e25_115.7	hydroxylase	1473	2124	0.62871
ZMYND11_BD_e5_50.0	BD	2185	2344	0.728879		ZMYND11_BD_e5_50.0	BD	1945	1896	0.929954
ZMYND11_BD_e5_50.1	BD	1780	1761	0.790268		ZMYND11_BD_e5_50.1	BD	1882	2192	0.778372
ZMYND11_BD_e6_93.3	BD	1167	1187	0.768495		ZMYND11_BD_e6_93.3	BD	1041	1106	0.852957
ZMYND11_BD_e6_93.5	BD	421	414	0.793905		ZMYND11_BD_e6_93.5	BD	450	435	0.936282
ZMYND11_BD_e7_88.0	BD	2250	2402	0.732445		ZMYND11_BD_e7_88.0	BD	2132	2461	0.785422
ZMYND11_BD_e7_88.1	BD	958	784	0.954824		ZMYND11_BD_e7_88.1	BD	881	803	0.993935
ZMYND11_BD_e8_56.0	BD	1348	1325	0.795288		ZMYND11_BD_e8_56.0	BD	1038	1526	0.616556
ZMYND8_BD_e5_59.3	BD	1021	503	1.58522		ZMYND8_BD_e5_59.3	BD	849	760	1.01196
ZMYND8_BD_e5_59.4	BD	412	175	1.83328		ZMYND8_BD_e5_59.4	BD	414	305	1.22744
ZMYND8_BD_e6_93.0	BD	2895	2185	1.03597		ZMYND8_BD_e6_93.0	BD	2722	2277	1.08378
ZMYND8_BD_e6_93.11	BD	236	187	0.983025		ZMYND8_BD_e6_93.11	BD	247	259	0.86192
ZMYND8_BD_e6_93.6	BD	347	214	1.26368		ZMYND8_BD_e6_93.6	BD	324	320	0.915701
ZMYND8_BD_e7_88.1	BD	1154	704	1.28073		ZMYND8_BD_e7_88.1	BD	958	864	1.00458
ZMYND8_BD_e7_88.2	BD	1616	1492	0.846743		ZMYND8_BD_e7_88.2	BD	1328	1744	0.690261
ZMYND8_BD_e7_88.6	BD	552	569	0.757769		ZMYND8_BD_e7_88.6	BD	534	519	0.931544
