# Supplementary material for: Targeted degradation of BRD9 reverses oncogenic gene expression in synovial sarcoma
Source: eLife. 2018 Nov 15;7:e41305. doi: 10.7554/eLife.41305 (PMC6277197; doi:10.7554/eLife.41305)
Supplement: Figure 1—source data 3. [file elife-41305-fig1-data3.xlsx]

## Sheet: Figure 1-source data 3
	SYO1 cells																	HSSYII cells
	ROSA26			RPA3			sg-1			sg-2			sg-3					ROSA26			RPA3			sg-1			sg-2			sg-3
Time	Relative GFP+ve cells	StDev	n	Relative GFP+ve cells	StDev	n	Relative GFP+ve cells	StDev	n	Relative GFP+ve cells	StDev	n	Relative GFP+ve cells	StDev	n		Time	Relative GFP+ve cells	StDev	n	Relative GFP+ve cells	StDev	n	Relative GFP+ve cells	StDev	n	Relative GFP+ve cells	StDev	n	Relative GFP+ve cells	StDev	n
Day 3	100	0	3	100	0	3	100	0	3	100	0	3	100	0	3		Day 3	100	0	3	100	0	3	100	0	3	100	0	3	100	0	3
Day 6	100	3	3	64	8	3	71	2	3	73	2	3	68	0	3		Day 6	91	5	3	7	2	3	58	9	3	91	5	3	91	5	3
Day 9	99	1	3	51	11	3	55	3	3	62	1	3	55	3	3		Day 9	87	3	3	2	1	3	33	5	3	87	3	3	87	3	3
Da 12	100	1	3	32	7	3	40	6	3	51	2	3	35	1	3		Da 12	85	7	3	1	0	3	20	3	3	85	7	3	85	7	3
Day 15	98	1	3	18	2	3	28	6	3	37	3	3	20	1	3		Day 15	79	3	3	1	0	3	13	1	3	79	3	3	79	3	3
Day 18	95	6	3	1	0	3	11	1	3	8	1	3	4	4	3		Day 18	77	5	3	1	0	3	7	4	3	77	5	3	77	5	3
	A673 cells																	SKNMC cells
	ROSA26			RPA3			sg-1			sg-2			sg-3					ROSA26			RPA3			sg-1			sg-2			sg-3
Time	Relative GFP+ve cells	StDev	n	Relative GFP+ve cells	StDev	n	Relative GFP+ve cells	StDev	n	Relative GFP+ve cells	StDev	n	Relative GFP+ve cells	StDev	n		Time	Relative GFP+ve cells	StDev	n	Relative GFP+ve cells	StDev	n	Relative GFP+ve cells	StDev	n	Relative GFP+ve cells	StDev	n	Relative GFP+ve cells	StDev	n
Day 3	100	0	3	100	0	3	100	0	3	100	0	3	100	0	3		Day 3	100	0	3	100	0	3	100	0	3	100	0	3	100	0	3
Day 6	95	5	3	13	5	3	93	5	3	95	4	3	94	2	3		Day 6	98.2	3.5	3	17.7	3.6	3	89.9	3.6	3	87.8	4.1	3	97.3	4.1	3
Day 9	94	3	3	6	3	3	95	7	3	93	3	3	93	7	3		Day 9	97.7	2.1	3	7.1	1.5	3	87.4	6.3	3	85.5	5.3	3	94.2	5.6	3
Da 12	93	5	3	3	3	3	97	3	3	91	6	3	95	9	3		Da 12	96.5	5.6	3	3.1	0.5	3	84.5	3.1	3	84.1	3.4	3	90.3	4.6	3
Day 15	92	6	3	2	1	3	93	4	3	89	2	3	92	4	3		Day 15	95.9	4.2	3	1.6	0.2	3	83.4	4.6	3	83.4	3.1	3	88.5	6.1	3
Day 18	90	3	3	1	1	3	94	8	3	91	4	3	91	6	3		Day 18	96.1	8.1	3	0.2	0.1	3	85.1	5.1	3	83.1	6.9	3	87.5	2.1	3
	RH30 cells																	RH41 cells
	ROSA26			RPA3			sg-1			sg-2			sg-3					ROSA26			RPA3			sg-1			sg-2			sg-3
Time	Relative GFP+ve cells	StDev	n	Relative GFP+ve cells	StDev	n	Relative GFP+ve cells	StDev	n	Relative GFP+ve cells	StDev	n	Relative GFP+ve cells	StDev	n		Time	Relative GFP+ve cells	StDev	n	Relative GFP+ve cells	StDev	n	Relative GFP+ve cells	StDev	n	Relative GFP+ve cells	StDev	n	Relative GFP+ve cells	StDev	n
Day 3	100	0	3	100	0	3	100	0	3	100	0	3	100	0	3		Day 3	100	0	3	100	0	3	100	0	3	100	0	3	100	0	3
Day 6	98	1	3	38	9	3	93	7	3	98	4	3	98	6	3		Day 6	83	5	3	59	7	3	94	4	3	92	2	3	93	5	3
Day 9	99	5	3	20	4	3	95	2	3	99	3	3	90	4	3		Day 9	80	2	3	21	4	3	87	6	3	85	6	3	87	1	3
Da 12	98	3	3	7	2	3	94	4	3	101	2	3	89	5	3		Da 12	75	4	3	8	2	3	84	5	3	81	3	3	85	6	3
Day 15	100	7	3	3	1	3	91	3	3	100	5	3	84	7	3		Day 15	61	5	3	1	1	3	78	3	3	80	4	3	77	2	3
Day 18	101	4	3	1	1	3	87	5	3	97	3	3	83	4	3		Day 18	65	6	3	1	0	3	74	4	3	78	8	3	67	4	3
*	Relative GFP+ve cells reflects the percentage of GFP positive cells over time in cells infected with each of the indicated control (ROSA26, RPA3) or BRD9 bromodomain targeting (sg-1. sg2, sg-3) sgRNAs
*	StDev reflects the standard deviation of values in 3 biological replicate experiments
