# Supplementary material for: Targeted degradation of BRD9 reverses oncogenic gene expression in synovial sarcoma
Source: eLife. 2018 Nov 15;7:e41305. doi: 10.7554/eLife.41305 (PMC6277197; doi:10.7554/eLife.41305)
Supplement: Figure 1—source data 4. [file elife-41305-fig1-data4.xlsx]

## Sheet: Figure 1-source data 4
Time	Relative GFP+ve cells	StDev	n	Relative GFP+ve cells	StDev	n	Relative GFP+ve cells	StDev	n	Relative GFP+ve cells	StDev	n	Relative GFP+ve cells	StDev	n	Relative GFP+ve cells	StDev	n	Relative GFP+ve cells	StDev	n	Relative GFP+ve cells	StDev	n
Day 3	100	0	3	100	0	3	100	0	3	100	0	3	100	0	3	100	0	3	100	0	3	100	0	3
Day 6	95	2	3	86	6	3	96	5	3	97	1	3	94	3	3	88	2	3	85	0	3	81	2	3
Day 9	93	1	3	65	2	3	96	2	3	92	2	3	95	5	3	74	1	3	88	3	3	73	3	3
Da 12	94	4	3	53	5	3	94	2	3	87	2	3	96	4	3	61	3	3	82	1	3	53	5	3
Day 15	92	6	3	37	5	3	94	2	3	83	1	3	95	5	3	48	6	3	87	3	3	40	2	3
Day 18	90	6	3	19	4	3	92	5	3	77	2	3	92	4	3	29	4	3	86	2	3	24	3	3
	sgROSA26			bromo sg15			sgROSA26			bromo sg15			sgROSA26			bromo sg15			sgROSA26			bromo sg15
	Vector						BRD9-FL						BRD9 Dbromo						BRD9-N216A
*	Relative GFP+ve cells reflects the percentage of GFP positive cells over time in cells infected with each of the indicated control (ROSA26) or BRD9 bromodomain targeting (bromo sg-15) sgRNAs in each respective rescue background - Vector, BRD9-FL, BRD9 Dbromo, BRD9-N216A
*	StDev reflects the standard deviation of values in 3 biological replicate experiments
