# Supplementary material for: Targeted degradation of BRD9 reverses oncogenic gene expression in synovial sarcoma
Source: eLife. 2018 Nov 15;7:e41305. doi: 10.7554/eLife.41305 (PMC6277197; doi:10.7554/eLife.41305)
Supplement: Figure 2—figure supplement 1—source data 1. [file elife-41305-fig2-figsupp1-data1.xlsx]

## Sheet: Figure2-figure supplement 1-sd1
LFQ intensity GFP_1	LFQ intensity GFP_2	LFQ intensity GFP_3	LFQ intensity SS18_SSX1_1	LFQ intensity SS18_SSX1_2	LFQ intensity SS18_SSX1_3	Only identified by site	Reverse	Student's T-test Significant SS18-SSX1_GFP	Student's T-test significant	Selection	Peptides	Intensity	-Log Student's T-test p-value SS18-SSX1_GFP	Student's T-test q-value SS18-SSX1_GFP	Student's T-test Difference SS18-SSX1_GFP	Student's T-test Test statistic SS18-SSX1_GFP	Gene ID	-Log Student's T-test p-value SS18-SSX1_GFP	Student's T-test Difference SS18-SSX1_GFP
22.088	22.4249	22.6091	31.9187	31.4533	31.6278			+	SS18-SSX1_GFP		58	49771000000	5.85547	0	9.2926	7.71675	ARID1A	5.85547	9.2926
24.1808	24.6856	24.8344	32.9755	33.0613	33.0621			+	SS18-SSX1_GFP		64	136840000000	5.73124	0	8.46605	7.05584	SMARCA4	5.73124	8.46605
22.1168	22.0746	21.8921	30.1879	29.5177	31.1568			+	SS18-SSX1_GFP		23	28355000000	4.17183	0	8.25966	5.57809	DPF2	4.17183	8.25966
22.4417	23.0937	22.6935	30.3687	30.1534	30.9589			+	SS18-SSX1_GFP		54	24182000000	4.83739	0	7.75068	5.9319	SMARCC2	4.83739	7.75068
23.9969	24.1357	24.1853	31.6654	31.7198	31.1818			+	SS18-SSX1_GFP		32	42856000000	5.68277	0	7.41636	6.2848	SMARCD1	5.68277	7.41636
22.6446	25.1252	23.7263	30.8842	31.4104	30.2589			+	SS18-SSX1_GFP		20	24832000000	3.04929	0	7.01911	3.91819	SMARCB1	3.04929	7.01911
23.0748	22.5112	23.2228	29.5518	29.1529	29.8065			+	SS18-SSX1_GFP		8	15459000000	4.6571	0	6.56747	5.09744	SMC4	4.6571	6.56747
24.3088	23.5989	23.2771	30.5566	31.1597	29.0877			+	SS18-SSX1_GFP		27	23276000000	3.16842	0	6.53971	3.87735	SMARCD2	3.16842	6.53971
24.1057	24.9707	24.2374	30.7696	31.061	31.1013			+	SS18-SSX1_GFP		22	36773000000	4.64797	0	6.5394	5.0745	SMARCE1	4.64797	6.5394
26.9342	27.523	26.8321	33.2477	33.2409	33.475			+	SS18-SSX1_GFP		56	156920000000	4.96565	0	6.22479	5.06641	SMARCC1	4.96565	6.22479
23.1259	21.9852	21.6908	29.436	29.5092	26.5193			+	SS18-SSX1_GFP		6	9630200000	2.34977	0	6.22088	2.99436	SS18-SSX	2.34977	6.22088
23.323	23.2724	26.3852	30.1498	30.1757	31.2642			+	SS18-SSX1_GFP		45	26335000000	2.32299	0	6.20299	2.96396	ARID1B	2.32299	6.20299
23.7084	23.2025	23.6671	29.4706	29.4945	29.4406			+	SS18-SSX1_GFP		52	13378000000	5.47189	0	5.94256	5.10998	SMARCA2	5.47189	5.94256
25.6069	25.8502	25.7875	31.2834	31.3994	32.2763			+	SS18-SSX1_GFP		20	46557000000	4.28484	0	5.90481	4.46723	ACTL6A	4.28484	5.90481
24.0197	24.2198	24.0029	29.918	29.9963	29.8629			+	SS18-SSX1_GFP		16	13746000000	6.68371	0	5.84492	5.41347	NDUFA9	6.68371	5.84492
22.9067	27.7841	22.4539	30.2225	28.5871	31.6268			+	SS18-SSX1_GFP		33	22230000000	1.40006	0	5.7639	1.97456	ACTB	1.40006	5.7639
22.4656	23.0469	23.5021	28.1948	28.1106	29.0649			+	SS18-SSX1_GFP		12	6227300000	3.66069	0	5.45193	3.8184	SLC25A11	3.66069	5.45193
23.671	22.9786	22.6014	29.0435	29.1848	27.3549			+	SS18-SSX1_GFP		11	10246000000	2.91364	0	5.44405	3.26764	SFXN1	2.91364	5.44405
25.8408	25.3999	24.9695	30.632	30.7103	31.1249			+	SS18-SSX1_GFP		33	25908000000	4.29049	0	5.41901	4.18662	PLS3	4.29049	5.41901
22.4361	22.5259	22.7744	28.2229	28.2161	27.4142			+	SS18-SSX1_GFP		3	4716500000	4.31993	0	5.37226	4.17466	BCL7A	4.31993	5.37226
23.3154	23.0129	22.7003	28.3336	28.1952	28.4679			+	SS18-SSX1_GFP		21	6333200000	4.97691	0	5.32271	4.457	NNT	4.97691	5.32271
23.5964	23.9029	24.2549	28.7932	29.2246	29.4392			+	SS18-SSX1_GFP		27	5459100000	4.38683	0	5.23428	4.12521	ADNP	4.38683	5.23428
22.9839	23.1043	23.1306	27.9936	28.0864	28.5973			+	SS18-SSX1_GFP		5	5926100000	4.93129	0	5.15281	4.31898	TMED10	4.93129	5.15281
23.3148	23.3672	24.0282	28.2793	28.4649	29.1545			+	SS18-SSX1_GFP		5	6893200000	3.86931	0	5.06284	3.74595	BANF1	3.86931	5.06284
21.7072	22.3336	23.5437	27.5199	27.4078	27.6217			+	SS18-SSX1_GFP		3	2854900000	3.10946	0	4.98831	3.23385	NDUFS4	3.10946	4.98831
23.8616	21.7004	21.7553	27.347	27.146	27.2402			+	SS18-SSX1_GFP		8	3058500000	2.59574	0	4.80529	2.80387	CANX	2.59574	4.80529
24.5167	22.4713	24.3483	28.2548	28.4032	29.0919			+	SS18-SSX1_GFP		4	6579300000	2.61688	0	4.80452	2.81882	ATP5J2-PTCD1	2.61688	4.80452
22.7897	22.8997	22.128	27.1789	27.2893	27.6135			+	SS18-SSX1_GFP		20	2801200000	4.18876	0	4.75477	3.73209	AFDN	4.18876	4.75477
22.363	23.1218	22.7921	27.5516	27.3752	27.5859			+	SS18-SSX1_GFP		13	1971000000	4.49304	0	4.74521	3.86053	GLTSCR1	4.49304	4.74521
22.882	22.6741	23.9204	28.0194	28.0107	27.6794			+	SS18-SSX1_GFP		22	4703500000	3.53261	0	4.74431	3.38537	SMARCD3	3.53261	4.74431
24.9187	25.5044	24.8521	29.6991	29.6102	29.8312			+	SS18-SSX1_GFP		19	15823000000	4.54196	0	4.62177	3.79782	UQCRC1	4.54196	4.62177
24.7432	23.2971	22.7582	27.9557	28.0029	28.525			+	SS18-SSX1_GFP		6	4165300000	2.74019	0	4.56168	2.81568	TOMM22	2.74019	4.56168
23.3005	22.8348	24.5346	27.9722	27.9303	27.9697			+	SS18-SSX1_GFP		20	4460900000	3.01244	0	4.40074	2.91963	EMC1	3.01244	4.40074
22.4428	22.0845	22.5478	26.4888	26.3775	27.2627			+	SS18-SSX1_GFP		7	1459600000	3.81598	0	4.35128	3.31723	POGZ	3.81598	4.35128
25.225	24.7012	23.9249	28.7255	28.7789	29.3607			+	SS18-SSX1_GFP		24	9053000000	3.26905	0	4.33797	3.03571	SLC25A13	3.26905	4.33797
23.2277	23.036	22.8453	27.2252	27.0678	27.8058			+	SS18-SSX1_GFP		4	2791300000	4.18499	0	4.32995	3.46371	NDUFV2	4.18499	4.32995
22.6284	22.6587	23.2491	27.1303	27.0082	27.3553			+	SS18-SSX1_GFP		4	3147400000	4.35354	0	4.31918	3.52247	ATP5J	4.35354	4.31918
22.3809	22.327	23.1671	26.6374	26.4977	27.4088			+	SS18-SSX1_GFP		3	1852500000	3.37404	0	4.22297	3.03289	MGST3	3.37404	4.22297
23.284	23.8558	21.8578	27.0279	27.0005	27.6142			+	SS18-SSX1_GFP		5	2681600000	2.59375	0	4.21502	2.59084	SEC11A	2.59375	4.21502
21.7235	23.7819	24.2317	27.3698	26.951	27.7737			+	SS18-SSX1_GFP		15	2808700000	2.15575	0	4.1191	2.27853	DYNC1H1	2.15575	4.1191
22.9436	22.4344	23.6504	26.8993	26.9461	27.435			+	SS18-SSX1_GFP		12	2630900000	3.31942	0	4.08403	2.934	SLC25A24	3.31942	4.08403
27.7489	27.2733	27.8547	31.5215	31.5008	31.9669			+	SS18-SSX1_GFP		21	57157000000	4.17394	0	4.03742	3.26996	PHB	4.17394	4.03742
21.8901	22.7166	22.6982	26.3788	26.2269	26.5856			+	SS18-SSX1_GFP		4	1556400000	3.76968	0	3.96217	3.06753	COX15	3.76968	3.96217
22.3732	22.1922	22.9816	26.7389	26.485	26.2051			+	SS18-SSX1_GFP		4	2198900000	3.81313	0	3.96066	3.08412	ATP5I	3.81313	3.96066
23.036	22.7157	22.5534	26.7892	26.7874	26.5598			+	SS18-SSX1_GFP		9	1378000000	4.78353	0	3.94379	3.39703	UBP1	4.78353	3.94379
21.3807	23.3537	21.437	25.7015	25.748	26.3354			+	SS18-SSX1_GFP		3	945300000	2.32806	0	3.87117	2.30452	EIF3F	2.32806	3.87117
23.4122	25.0804	22.5947	27.5994	27.2649	27.7796			+	SS18-SSX1_GFP		13	2309800000	2.17348	0	3.85221	2.20526	MTA1	2.17348	3.85221
22.7159	23.5957	22.6073	26.3115	26.4101	27.563			+	SS18-SSX1_GFP		6	1761500000	2.75864	0	3.7886	2.51026	KARS	2.75864	3.7886
24.1057	23.8318	23.9447	27.8001	27.6399	27.69			+	SS18-SSX1_GFP		3	4099100000	5.65508	0	3.7493	3.43189	UQCR10	5.65508	3.7493
21.9547	23.5018	23.1999	26.3614	26.3912	27.1423			+	SS18-SSX1_GFP		8	1292600000	2.65054	0	3.74613	2.43573	VRK3	2.65054	3.74613
23.466	23.1871	22.5247	26.9939	26.726	26.5153			+	SS18-SSX1_GFP		4	1901000000	3.53394	0	3.68579	2.81012	NDUFS8	3.53394	3.68579
27.8539	27.0667	27.5883	31.1296	31.3748	30.9587			+	SS18-SSX1_GFP		18	46783000000	3.82081	0	3.65141	2.89601	PHB2	3.82081	3.65141
23.3095	22.9415	22.4817	26.4064	26.4808	26.794			+	SS18-SSX1_GFP		2	1333400000	3.77831	0	3.6495	2.8798	NPM3	3.77831	3.6495
24.3952	24.2555	24.419	27.6078	27.7581	28.5861			+	SS18-SSX1_GFP		12	3433700000	3.52438	0	3.62745	2.77241	OSBPL8	3.52438	3.62745
21.6872	23.2868	22.1838	25.7198	25.8614	26.4324			+	SS18-SSX1_GFP		164	1323300000	2.64814	0	3.61863	2.37997	SPTAN1	2.64814	3.61863
22.4953	22.813	23.4029	26.3521	26.5278	26.6461			+	SS18-SSX1_GFP		4	1918500000	3.68246	0	3.60492	2.81793	SPCS3	3.68246	3.60492
22.3357	23.945	21.6811	26.0024	26.0992	26.673			+	SS18-SSX1_GFP		4	1433500000	2.16099	0	3.60428	2.11465	TOMM40	2.16099	3.60428
21.8815	22.5249	22.6469	25.6684	25.7395	26.4187			+	SS18-SSX1_GFP		3	783300000	3.35754	0	3.59115	2.68606	POLR2C	3.35754	3.59115
26.3401	25.6801	24.4162	28.5044	29.0811	29.5695			+	SS18-SSX1_GFP		15	10044000000	2.2897	0	3.57286	2.17472	RPN2	2.2897	3.57286
22.0742	22.9917	23.566	26.6652	26.6792	25.9512			+	SS18-SSX1_GFP		10	1196200000	2.6958	0	3.55458	2.37526	ZMYM3	2.6958	3.55458
23.5723	22.9098	23.5224	26.6291	26.7933	27.1483			+	SS18-SSX1_GFP		4	3769800000	3.74909	0	3.52204	2.78996	RAB1B	3.74909	3.52204
22.2718	22.7183	22.5334	25.8152	25.666	26.5565			+	SS18-SSX1_GFP		3	1223900000	3.48874	0	3.50473	2.68704	FAM101B	3.48874	3.50473
21.4701	22.235	22.9538	25.3805	25.3697	26.3706			+	SS18-SSX1_GFP		8	932640000	2.52304	0	3.48732	2.26172	EDC4	2.52304	3.48732
22.2291	21.801	21.4146	25.1125	25.114	25.5282			+	SS18-SSX1_GFP		7	619720000	3.64071	0	3.43668	2.69998	MACF1	3.64071	3.43668
25.9581	25.8477	25.9107	29.2832	29.1129	29.5972			+	SS18-SSX1_GFP		15	10936000000	4.71562	0	3.4256	2.99072	NDUFA9	4.71562	3.4256
23.7418	22.6419	23.9102	26.6554	26.7423	27.1702			+	SS18-SSX1_GFP		12	2855200000	2.87714	0	3.42464	2.39764	TOMM70	2.87714	3.42464
26.8059	26.5466	26.9074	29.9481	29.974	30.582			+	SS18-SSX1_GFP		39	16176000000	3.89696	0	3.41478	2.76879	ACTN4	3.89696	3.41478
23.2497	22.8415	22.2412	26.0261	26.0955	26.4347			+	SS18-SSX1_GFP		2	1268800000	3.36187	0	3.40798	2.58385	CDIPT	3.36187	3.40798
22.9361	22.5348	23.1434	25.981	25.9177	26.8755			+	SS18-SSX1_GFP		5	1538200000	3.16112	0	3.38663	2.49543	CYB5R3	3.16112	3.38663
23.6799	23.4196	22.2827	26.1051	26.2017	27.2001			+	SS18-SSX1_GFP		6	1274100000	2.43608	0	3.37493	2.17224	TERF2	2.43608	3.37493
21.7445	25.7777	23.4231	26.9903	26.7914	27.1978			+	SS18-SSX1_GFP		11	2007500000	1.3314	0.000674157	3.34473	1.53739	IARS	1.3314	3.34473
23.2744	22.8038	22.4913	25.787	25.8187	26.948			+	SS18-SSX1_GFP		2	1285200000	2.76893	0	3.32806	2.30388	SSR3	2.76893	3.32806
23.9843	23.3907	26.1488	27.6598	27.6056	28.2106			+	SS18-SSX1_GFP		12	3014100000	1.74001	0	3.31742	1.78342	RBBP4	1.74001	3.31742
22.2872	22.4298	23.0448	26.219	26.1373	25.3155			+	SS18-SSX1_GFP		4	1326900000	3.05807	0	3.30335	2.41032	FAM162A	3.05807	3.30335
22.3416	23.9034	23.3674	26.4179	26.3405	26.7255			+	SS18-SSX1_GFP		9	1516400000	2.64896	0	3.29045	2.23383	ADD3	2.64896	3.29045
25.8841	25.7739	26.0297	29.3621	29.3092	28.8704			+	SS18-SSX1_GFP		4	10131000000	4.34824	0	3.28469	2.80135	MT-CO2	4.34824	3.28469
28.9078	28.7442	28.7628	31.8526	31.9782	32.4244			+	SS18-SSX1_GFP		24	92932000000	4.26305	0	3.28011	2.7773	ATP5B	4.26305	3.28011
25.3415	24.6745	22.6077	27.4925	27.5188	27.4261			+	SS18-SSX1_GFP		9	3459500000	1.7825	0	3.27123	1.79401	RHOA	1.7825	3.27123
25.4457	23.0222	26.1307	27.6955	28.3868	28.2448			+	SS18-SSX1_GFP		10	5604800000	1.54659	0	3.24282	1.64926	UQCRFS1	1.54659	3.24282
21.794	25.3698	23.9105	26.6167	26.7477	27.433			+	SS18-SSX1_GFP		11	2552300000	1.41281	0.000710059	3.241	1.56687	STT3B	1.41281	3.241
22.5785	22.8946	22.1152	25.5013	25.3014	26.4438			+	SS18-SSX1_GFP		6	902490000	2.8128	0	3.21941	2.26927	KRI1	2.8128	3.21941
22.5424	22.2085	22.9291	25.8103	25.5481	25.9739			+	SS18-SSX1_GFP		13	853830000	3.73036	0	3.21745	2.58981	SLC25A12	3.73036	3.21745
25.3832	25.4228	25.5934	28.5746	28.6203	28.8178			+	SS18-SSX1_GFP		2	7009800000	5.27151	0	3.20446	2.91676	COX7A2	5.27151	3.20446
22.2111	23.9191	22.4379	25.9324	26.2196	26.0008			+	SS18-SSX1_GFP		6	1225400000	2.38126	0	3.19488	2.07123	OCIAD1	2.38126	3.19488
24.1705	24.9438	24.6864	27.8566	27.8178	27.6671			+	SS18-SSX1_GFP		13	2936800000	3.76616	0	3.18024	2.57598	MTA2	3.76616	3.18024
22.4545	23.1831	24.148	26.4247	26.3316	26.569			+	SS18-SSX1_GFP		7	1533800000	2.51917	0	3.17989	2.12658	ADD1	2.51917	3.17989
22.5711	22.2822	23.0753	25.7108	25.9068	25.8478			+	SS18-SSX1_GFP		5	1014900000	3.73431	0	3.17887	2.5659	EIF3D	3.73431	3.17887
23.0435	22.475	21.8041	25.4113	25.6985	25.7433			+	SS18-SSX1_GFP		9	1003100000	2.98185	0	3.17684	2.31378	NSF	2.98185	3.17684
27.9196	27.5614	26.8663	30.5511	30.6587	30.6508			+	SS18-SSX1_GFP		97	30226000000	3.2823	0	3.17108	2.41859	FLNB	3.2823	3.17108
22.7667	23.6903	22.1997	25.8888	26.0068	26.1882			+	SS18-SSX1_GFP		10	1181100000	2.68065	0	3.1424	2.17765	EXOSC10	2.68065	3.1424
25.4201	25.3064	25.0501	28.3068	28.1416	28.7551			+	SS18-SSX1_GFP		10	6764800000	3.90681	0	3.14231	2.58954	DDOST	3.90681	3.14231
22.9876	24.2195	23.0411	26.2758	26.2301	27.0788			+	SS18-SSX1_GFP		5	1311000000	2.5105	0	3.11219	2.09239	NOL6	2.5105	3.11219
23.0252	22.5244	23.1546	25.9305	26.0605	26.031			+	SS18-SSX1_GFP		8	1152400000	4.0317	0	3.10591	2.59658	CCAR2	4.0317	3.10591
24.4956	22.3603	24.4449	26.9306	26.5223	27.1308			+	SS18-SSX1_GFP		9	1944400000	1.88521	0	3.09429	1.79286	HNRNPUL1	1.88521	3.09429
26.3111	26.3583	26.7529	29.2242	29.2254	30.2526			+	SS18-SSX1_GFP		5	11882000000	2.95048	0	3.09331	2.25767	C1QBP	2.95048	3.09331
22.9402	23.3119	22.4804	25.7338	25.8751	26.3852			+	SS18-SSX1_GFP		4	988390000	3.23566	0	3.08722	2.35411	LAMTOR3	3.23566	3.08722
25.9555	26.5227	26.5114	29.4871	29.1661	29.5966			+	SS18-SSX1_GFP		23	12147000000	3.768	0	3.08672	2.51478	NDUFS1	3.768	3.08672
23.8651	23.4324	23.6835	26.3772	26.3398	27.5103			+	SS18-SSX1_GFP		3	1503900000	2.79971	0	3.08211	2.19517	MT-ND4	2.79971	3.08211
21.4305	23.3574	22.6802	25.2849	25.3237	26.0895			+	SS18-SSX1_GFP		3	658060000	2.10845	0	3.07669	1.8966	CWC27	2.10845	3.07669
24.6365	25.1687	25.2613	27.8736	27.9273	28.4838			+	SS18-SSX1_GFP		8	3078700000	3.43385	0	3.07272	2.40887	TFCP2	3.43385	3.07272
22.7571	23.1987	22.8195	25.7086	25.9171	26.3587			+	SS18-SSX1_GFP		2	977860000	3.69453	0	3.06972	2.48332	TOMM6	3.69453	3.06972
23.2211	24.6487	24.0649	26.9162	26.9054	27.2963			+	SS18-SSX1_GFP		3	2250000000	2.67199	0	3.06108	2.13485	NDUFB1	2.67199	3.06108
25.0154	24.84	24.4068	28.0206	27.0538	28.3635			+	SS18-SSX1_GFP		18	3593400000	2.67836	0	3.05859	2.13616	KTN1	2.67836	3.05859
23.0304	23.2778	22.6264	26.047	25.8423	26.2202			+	SS18-SSX1_GFP		3	1257500000	3.81653	0	3.05836	2.50885	NDUFA11	3.81653	3.05836
22.7257	24.2797	24.1968	26.913	26.9824	26.4434			+	SS18-SSX1_GFP		5	2314300000	2.33526	0	3.04554	1.98745	ATP1B3	2.33526	3.04554
22.2555	21.3189	24.5505	25.5085	25.4853	26.2637			+	SS18-SSX1_GFP		3	983350000	1.42601	0.00066482	3.04423	1.52715	LAMTOR2	1.42601	3.04423
23.0697	22.7909	21.2578	25.2049	25.3281	25.7126			+	SS18-SSX1_GFP		6	723380000	2.1898	0	3.0424	1.92114	CKAP2	2.1898	3.0424
22.8043	22.5003	23.3759	25.6891	25.8085	26.2307			+	SS18-SSX1_GFP		7	961850000	3.23288	0	3.01593	2.31154	RPA1	3.23288	3.01593
22.4932	23.2264	21.859	25.0515	25.3125	26.2015			+	SS18-SSX1_GFP		8	739430000	2.32667	0	2.99564	1.96239	DAP3	2.32667	2.99564
23.8107	22.9708	21.0192	25.5033	25.4404	25.8431			+	SS18-SSX1_GFP		5	715860000	1.63585	0.000371795	2.99536	1.63124	KPNA6	1.63585	2.99536
22.5412	22.0569	22.4492	24.9825	24.8945	26.0971			+	SS18-SSX1_GFP		2	702220000	2.70008	0	2.97557	2.10356	TIMM23B	2.70008	2.97557
24.5614	25.092	24.5647	28.118	27.9835	27.0388			+	SS18-SSX1_GFP		8	5118600000	2.83076	0	2.97407	2.15108	ATP5H	2.83076	2.97407
23.7201	23.0769	23.1365	26.3923	26.2932	26.1574			+	SS18-SSX1_GFP		5	1703400000	3.78851	0	2.96979	2.44186	ATAD1	3.78851	2.96979
22.8381	22.1772	22.6054	26.4999	25.539	24.4845			+	SS18-SSX1_GFP		2	1047300000	2.0752	0	2.96759	1.8394	0	2.0752	2.96759
24.2381	23.3504	22.9663	26.3066	26.224	26.9265			+	SS18-SSX1_GFP		14	1371400000	2.60981	0	2.96744	2.06504	AP2A2	2.60981	2.96744
22.9032	23.3662	22.3484	25.6837	25.9974	25.7903			+	SS18-SSX1_GFP		4	747990000	3.17706	0	2.95119	2.25579	PHF10	3.17706	2.95119
26.0107	26.2907	26.1935	29.0824	28.9707	29.1401			+	SS18-SSX1_GFP		7	10382000000	5.1461	0	2.89944	2.64559	CYC1	5.1461	2.89944
23.5851	23.3053	22.8559	26.3171	26.5611	25.565			+	SS18-SSX1_GFP		7	1613500000	2.85552	0	2.89896	2.1201	SPCS2	2.85552	2.89896
23.1268	23.349	22.6182	25.8464	25.8024	26.1412			+	SS18-SSX1_GFP		7	1236000000	3.56197	0	2.89865	2.33564	MLEC	3.56197	2.89865
23.4336	22.1639	22.9314	25.67	25.4433	26.1052			+	SS18-SSX1_GFP		3	945560000	2.64601	0	2.89655	2.04393	NHP2	2.64601	2.89655
22.4586	22.4488	21.6235	25.0017	24.9437	25.2399			+	SS18-SSX1_GFP		5	732940000	3.23442	0	2.88481	2.23419	RAB11A	3.23442	2.88481
25.5794	25.6844	25.2678	28.1708	28.168	28.8445			+	SS18-SSX1_GFP		19	5653000000	3.44163	0	2.88387	2.29341	HADHA	3.44163	2.88387
23.2843	21.8217	23.3352	25.4502	25.3247	26.3058			+	SS18-SSX1_GFP		5	669490000	2.10368	0	2.8798	1.81781	CXorf57	2.10368	2.8798
27.6328	26.4766	26.7615	29.7662	29.7148	29.9878			+	SS18-SSX1_GFP		79	18206000000	2.88057	0	2.86597	2.11087	SPTBN2	2.88057	2.86597
22.8388	22.2668	23.3058	25.5463	25.5471	25.831			+	SS18-SSX1_GFP		8	693300000	3.07508	0	2.83767	2.15785	SMCHD1	3.07508	2.83767
22.7552	22.5646	24.9417	26.6143	26.2902	25.8652			+	SS18-SSX1_GFP		10	1404400000	1.634	0.000720721	2.83607	1.58189	RBM4	1.634	2.83607
22.863	22.7461	23.4908	25.4418	25.7606	26.3921			+	SS18-SSX1_GFP		6	830740000	2.83861	0	2.83152	2.07814	NUP85	2.83861	2.83152
22.9145	22.6	22.4702	25.5718	25.6432	25.2323			+	SS18-SSX1_GFP		7	820080000	3.98626	0	2.82085	2.38462	WDR82	3.98626	2.82085
25.4135	25.1946	23.0896	27.4703	27.1991	27.4306			+	SS18-SSX1_GFP		5	3269700000	1.70245	0.000359133	2.8008	1.60444	UQCRB	1.70245	2.8008
22.7279	24.1015	22.5107	25.9316	25.8475	25.931			+	SS18-SSX1_GFP		4	826920000	2.29981	0	2.78995	1.86144	SIN3A	2.29981	2.78995
23.5453	25.2346	22.1089	26.0982	26.0148	27.1222			+	SS18-SSX1_GFP		6	1443100000	1.3403	0.000576923	2.78212	1.41159	KPNA3	1.3403	2.78212
23.542	23.182	23.552	26.3549	25.9716	26.2708			+	SS18-SSX1_GFP		8	1463200000	4.09997	0	2.77377	2.37411	GLG1	4.09997	2.77377
24.1962	22.9855	22.6359	25.7544	25.6417	26.7136			+	SS18-SSX1_GFP		3	1251400000	2.04597	0	2.76402	1.74678	PDCD6	2.04597	2.76402
24.8213	23.2326	21.807	26.1297	26.0595	25.9522			+	SS18-SSX1_GFP		14	1149600000	1.46824	0.000629921	2.76018	1.47437	CTNNB1	1.46824	2.76018
22.4747	23.1263	23.0484	25.5208	25.5136	25.8858			+	SS18-SSX1_GFP		7	684330000	3.4887	0	2.75695	2.22445	KIF4A	3.4887	2.75695
23.1456	22.5887	21.8143	25.2203	24.8328	25.7189			+	SS18-SSX1_GFP		3	542360000	2.38806	0	2.74112	1.87305	RBM5	2.38806	2.74112
25.7907	25.3193	25.7144	27.9776	28.2056	28.8474			+	SS18-SSX1_GFP		7	5342000000	3.10341	0	2.73543	2.10647	NDUFA13	3.10341	2.73543
25.21	24.1936	24.9481	27.5861	27.4069	27.5379			+	SS18-SSX1_GFP		14	2963400000	3.03879	0	2.72637	2.08224	CEBPZ	3.03879	2.72637
23.9875	23.5308	22.4564	26.0053	25.9875	26.1052			+	SS18-SSX1_GFP		19	1097600000	2.39676	0	2.70774	1.86059	SMARCB1	2.39676	2.70774
23.1737	25.9234	23.7351	26.6736	26.8043	27.4725			+	SS18-SSX1_GFP		8	2192000000	1.43861	0.000598504	2.70604	1.44358	PPP1R9B	1.43861	2.70604
22.1944	22.5401	23.5187	25.2404	25.4656	25.6551			+	SS18-SSX1_GFP		5	874000000	2.54493	0	2.70263	1.91095	FAF2	2.54493	2.70263
22.517	23.4336	23.0119	25.6083	25.7413	25.7111			+	SS18-SSX1_GFP		4	849930000	3.26283	0	2.69939	2.12898	UBAP2L	3.26283	2.69939
22.4747	23.1846	22.8483	25.8956	25.7696	24.893			+	SS18-SSX1_GFP		3	1542900000	2.69037	0	2.68352	1.95012	ATP5D	2.69037	2.68352
22.8418	22.8593	22.6228	25.1264	25.2701	25.9669			+	SS18-SSX1_GFP		1	526700000	3.2346	0	2.6798	2.10927	LSM5	3.2346	2.6798
24.8704	24.8044	23.4519	26.6101	26.6221	27.8971			+	SS18-SSX1_GFP		18	1896100000	1.87696	0.00037299	2.66755	1.63723	MDN1	1.87696	2.66755
25.2127	21.5881	24.851	26.6139	26.0308	26.9487			+	SS18-SSX1_GFP		12	1853800000	1.05094	0.00091954	2.6472	1.2124	GTPBP4	1.05094	2.6472
24.8708	24.8639	24.748	27.296	27.2284	27.889			+	SS18-SSX1_GFP		3	3008200000	3.61095	0	2.64353	2.17828	SSR1	3.61095	2.64353
22.6721	24.2501	22.1769	25.3371	25.3885	26.2764			+	SS18-SSX1_GFP		5	849380000	1.71427	0.000687679	2.6343	1.5537	EEF1D	1.71427	2.6343
22.5108	23.0615	24.0053	25.5344	25.4953	26.4508			+	SS18-SSX1_GFP		3	778050000	2.09757	0	2.63428	1.71442	GPC6	2.09757	2.63428
22.9186	22.5692	23.1339	25.1778	25.2431	26.1008			+	SS18-SSX1_GFP		7	838500000	2.82543	0	2.63336	1.9654	LARP1	2.82543	2.63336
22.7698	22.7805	22.5095	25.1204	24.8248	25.9973			+	SS18-SSX1_GFP		4	720640000	2.71353	0	2.62756	1.9277	EXOSC7	2.71353	2.62756
30.8602	30.9334	30.9198	33.5118	33.4783	33.6038			+	SS18-SSX1_GFP		149	212870000000	6.33762	0	2.62687	2.51683	SPTBN1	6.33762	2.62687
22.215	23.7388	22.51	25.5694	25.564	25.2077			+	SS18-SSX1_GFP		5	583890000	2.25945	0	2.6258	1.77216	RAD23B	2.25945	2.6258
23.8145	24.254	22.5667	25.7626	25.9731	26.7225			+	SS18-SSX1_GFP		6	1046100000	1.95581	0	2.60766	1.64696	CSNK1G3	1.95581	2.60766
22.8805	22.3003	22.4998	25.6127	25.2761	24.6114			+	SS18-SSX1_GFP		3	614120000	2.80866	0	2.60651	1.94538	POLR2G	2.80866	2.60651
23.053	23.237	22.5827	25.4326	25.3005	25.9311			+	SS18-SSX1_GFP		3	784180000	3.16325	0	2.59717	2.03934	SYNJ2BP	3.16325	2.59717
25.4508	25.9638	25.1529	28.1424	28.231	27.9711			+	SS18-SSX1_GFP		13	5370600000	3.31943	0	2.59232	2.07586	NDUFV1	3.31943	2.59232
23.5378	23.2743	23.5381	25.7568	25.7985	26.5689			+	SS18-SSX1_GFP		5	890180000	3.13076	0	2.59131	2.02721	RPRD2	3.13076	2.59131
23.751	21.8919	23.525	25.4791	25.4021	26.0524			+	SS18-SSX1_GFP		4	668080000	1.85331	0.000733945	2.58856	1.5973	EEF1E1	1.85331	2.58856
21.7781	22.6284	24.2172	25.257	25.515	25.5984			+	SS18-SSX1_GFP		2	629610000	1.63354	0.0006469	2.58228	1.49947	EIF3G	1.63354	2.58228
22.763	22.1337	23.2835	25.1124	25.0464	25.766			+	SS18-SSX1_GFP		5	633810000	2.51141	0	2.58156	1.83865	KIN	2.51141	2.58156
25.2458	21.9226	23.135	25.6665	25.5824	26.7827			+	SS18-SSX1_GFP		10	1077500000	1.15905	0.000710744	2.5761	1.25961	GTF3C1	1.15905	2.5761
25.9512	25.1515	25.4148	28.2761	28.1741	27.7703			+	SS18-SSX1_GFP		9	7152400000	3.09645	0	2.56768	2.00374	ATP5F1	3.09645	2.56768
21.8529	22.0652	22.4822	24.6478	24.5118	24.9308			+	SS18-SSX1_GFP		3	521900000	3.49129	0	2.56339	2.0973	SEC22B	3.49129	2.56339
22.7785	24.0503	22.9169	25.9449	25.8282	25.6622			+	SS18-SSX1_GFP		4	979750000	2.47202	0	2.56319	1.81638	MTCH1	2.47202	2.56319
22.8993	22.8234	23.2558	25.2862	25.2798	26.0667			+	SS18-SSX1_GFP		1	688270000	3.01713	0	2.5514	1.9728	MT-ND1	3.01713	2.5514
22.8731	23.6587	21.8276	25.2553	24.994	25.7567			+	SS18-SSX1_GFP		7	529700000	1.94153	0.000363636	2.54888	1.61767	KDM1A	1.94153	2.54888
23.6522	22.4345	23.4378	25.7715	25.5119	25.8606			+	SS18-SSX1_GFP		5	993130000	2.54378	0	2.53987	1.82775	TIMMDC1	2.54378	2.53987
25.0511	25.1126	24.9668	27.3355	27.2749	28.1098			+	SS18-SSX1_GFP		11	2814300000	3.12833	0	2.52989	1.98881	CSTF3	3.12833	2.52989
25.2498	25.3967	21.8016	26.9633	26.6231	26.4326			+	SS18-SSX1_GFP		4	2687500000	0.999052	0.00125859	2.52364	1.15506	PGRMC1	0.999052	2.52364
25.6927	25.5636	26.2217	28.4651	28.21	28.3383			+	SS18-SSX1_GFP		16	6669600000	3.5178	0	2.51176	2.06834	SLC3A2	3.5178	2.51176
22.5283	24.4797	22.9634	25.6367	25.8972	25.9535			+	SS18-SSX1_GFP		7	1033500000	1.85623	0.000707965	2.50532	1.56638	NUP210	1.85623	2.50532
23.7297	24.311	25.3488	27.2354	27.1097	26.5586			+	SS18-SSX1_GFP		4	2446100000	2.07678	0	2.50477	1.65097	NDUFB4	2.07678	2.50477
24.4364	24.9328	24.921	26.9472	26.9931	27.8317			+	SS18-SSX1_GFP		8	2182300000	2.7806	0	2.49392	1.87405	RPRD1B	2.7806	2.49392
22.5089	22.644	22.9193	25.0578	25.2167	25.2661			+	SS18-SSX1_GFP		6	561090000	4.27922	0	2.48949	2.19122	XAB2	4.27922	2.48949
25.5629	25.8277	23.756	27.4285	27.2737	27.896			+	SS18-SSX1_GFP		18	2905400000	1.66878	0.000638298	2.48389	1.4809	CTNNA1	1.66878	2.48389
22.7111	23.1922	24.6646	26.0818	25.8631	26.0729			+	SS18-SSX1_GFP		7	1134200000	1.86168	0.000695652	2.48328	1.55989	CASK	1.86168	2.48328
25.6277	25.3739	25.566	27.4654	27.9604	28.5709			+	SS18-SSX1_GFP		20	3485600000	2.77906	0	2.47638	1.8637	KIAA1429	2.77906	2.47638
23.9948	23.4566	23.0032	26.3016	25.6253	25.9395			+	SS18-SSX1_GFP		6	1448000000	2.68738	0	2.47056	1.83429	ABLIM1	2.68738	2.47056
22.7233	22.7874	22.3336	24.9388	24.8525	25.4518			+	SS18-SSX1_GFP		3	483250000	3.33361	0	2.46633	1.99748	BMS1	3.33361	2.46633
25.9723	26.2144	25.827	28.1574	28.0217	29.2314			+	SS18-SSX1_GFP		4	5760900000	2.45803	0	2.46562	1.76245	SNRPG	2.45803	2.46562
22.4589	23.4546	22.4584	25.1796	25.3226	25.2557			+	SS18-SSX1_GFP		3	723270000	2.7409	0	2.46203	1.84486	TXNL4A	2.7409	2.46203
28.0569	27.7795	27.7853	30.0674	30.0926	30.8436			+	SS18-SSX1_GFP		29	24032000000	3.09099	0	2.46066	1.93662	RPN1	3.09099	2.46066
25.0144	22.858	22.5488	26.0956	26.0507	25.6232			+	SS18-SSX1_GFP		4	1415400000	1.44128	0.000555556	2.44938	1.36839	NDUFS5	1.44128	2.44938
22.9189	24.2992	24.134	25.9661	25.9115	26.8156			+	SS18-SSX1_GFP		6	1122800000	2.02009	0.000360248	2.44702	1.60518	EIF3L	2.02009	2.44702
22.0273	22.8632	23.2228	24.9658	24.7045	25.7668			+	SS18-SSX1_GFP		5	469860000	2.16143	0	2.44124	1.65285	COPE	2.16143	2.44124
28.1738	28.0289	27.7657	30.3956	30.3453	30.5415			+	SS18-SSX1_GFP		52	17625000000	4.28116	0	2.43797	2.1515	CHD4	4.28116	2.43797
23.802	23.0597	22.83	25.3126	25.4287	26.2628			+	SS18-SSX1_GFP		3	1030100000	2.36163	0	2.43748	1.71769	ZMPSTE24	2.36163	2.43748
26.0558	25.5453	26.1156	28.5005	28.5499	27.9732			+	SS18-SSX1_GFP		5	6920900000	3.15047	0	2.43563	1.93536	COX5B	3.15047	2.43563
22.5721	23.9016	22.8511	25.2212	25.4378	25.9678			+	SS18-SSX1_GFP		9	853540000	2.20787	0	2.43403	1.66539	AFG3L2	2.20787	2.43403
25.3641	25.4442	24.7896	27.2903	27.4142	28.1935			+	SS18-SSX1_GFP		12	2810600000	2.64859	0	2.43333	1.80263	MRE11A	2.64859	2.43333
22.9906	22.6545	23.6143	25.322	25.3779	25.8566			+	SS18-SSX1_GFP		3	629360000	2.75141	0	2.43236	1.83106	MT-ND5	2.75141	2.43236
23.4676	27.3799	26.804	28.0581	28.1727	28.7061			+	SS18-SSX1_GFP		2	6170800000	0.917795	0.00256427	2.42845	1.08619	RPLP1	0.917795	2.42845
22.8849	22.9379	23.9133	26.0394	25.7338	25.2442			+	SS18-SSX1_GFP		5	1018000000	2.40226	0	2.42709	1.72536	SEC63	2.40226	2.42709
22.8707	22.3745	22.7373	24.8111	24.9746	25.4677			+	SS18-SSX1_GFP		1	452230000	3.21962	0	2.42366	1.94386	SCOC	3.21962	2.42366
24.6392	22.9549	24.8795	26.4668	26.4484	26.7871			+	SS18-SSX1_GFP		5	1581800000	1.76169	0.000641711	2.40956	1.49165	SLC1A5	1.76169	2.40956
26.7182	27.0503	26.5293	28.8837	29.1503	29.4908			+	SS18-SSX1_GFP		30	9122200000	3.31002	0	2.40905	1.9546	MYO1C	3.31002	2.40905
23.3541	22.4699	23.0676	25.0228	25.2101	25.8852			+	SS18-SSX1_GFP		3	601570000	2.54454	0	2.40887	1.75914	MRS2	2.54454	2.40887
23.3548	22.479	22.047	25.0309	24.9352	25.1166			+	SS18-SSX1_GFP		3	683110000	2.45879	0	2.40066	1.72924	EMC7	2.45879	2.40066
24.8771	22.3891	22.1331	25.2926	25.0569	26.2314			+	SS18-SSX1_GFP		7	744650000	1.18985	0.000950495	2.39393	1.2303	QARS	1.18985	2.39393
25.0583	24.6544	22.8113	26.7693	26.2361	26.6422			+	SS18-SSX1_GFP		4	1695100000	1.54186	0.000566038	2.37455	1.38862	NDUFB3	1.54186	2.37455
24.5827	24.7918	23.0328	26.6846	26.9345	25.9012			+	SS18-SSX1_GFP		6	1981800000	1.69148	0.000601504	2.37099	1.44913	NDUFB5	1.69148	2.37099
27.2581	27.3437	26.9283	29.2746	29.4741	29.8701			+	SS18-SSX1_GFP		27	13096000000	3.40157	0	2.36291	1.94317	TMPO	3.40157	2.36291
25.8218	22.537	22.8963	25.9331	25.9663	26.416			+	SS18-SSX1_GFP		11	1425200000	1.05123	0.0014552	2.35345	1.14699	RANGAP1	1.05123	2.35345
23.0211	23.4969	23.4264	26.119	25.7378	25.1409			+	SS18-SSX1_GFP		14	1066200000	2.73342	0	2.3511	1.77989	UTRN	2.73342	2.3511
24.209	24.2221	23.8369	26.2605	25.9583	27.0986			+	SS18-SSX1_GFP		6	1278500000	2.5293	0	2.34975	1.72306	CTNNBL1	2.5293	2.34975
24.0941	22.6848	21.7967	25.5287	25.3905	24.6991			+	SS18-SSX1_GFP		3	822220000	1.51439	0.000554273	2.34755	1.36771	RAP2A	1.51439	2.34755
22.6471	24.9581	23.3801	26.1529	26.0112	25.8287			+	SS18-SSX1_GFP		4	1296600000	1.56169	0.00056338	2.33583	1.38356	NDUFA2	1.56169	2.33583
29.7545	29.5681	29.4646	31.8739	31.8235	32.0793			+	SS18-SSX1_GFP		33	45485000000	4.4496	0	2.3298	2.08879	XRCC5	4.4496	2.3298
22.2534	23.4515	26.4106	26.6414	26.6459	25.8165			+	SS18-SSX1_GFP		3	1190100000	0.855239	0.0044858	2.32946	1.02807	HIST2H3PS2	0.855239	2.32946
21.8298	22.6327	23.3839	25.0612	25.1012	24.6623			+	SS18-SSX1_GFP		5	524550000	2.10953	0.000722892	2.32609	1.58228	ESF1	2.10953	2.32609
23.0449	23.3064	23.2664	24.8598	25.6255	26.106			+	SS18-SSX1_GFP		4	650630000	2.47632	0	2.32448	1.6944	H2AFY	2.47632	2.32448
23.0475	21.774	22.4793	24.792	24.5296	24.9329			+	SS18-SSX1_GFP		4	436670000	2.40883	0	2.31788	1.67137	DDX6	2.40883	2.31788
23.4356	23.0912	23.2883	25.7325	25.4409	25.5936			+	SS18-SSX1_GFP		5	689190000	4.22794	0	2.31725	2.04969	DPF1	4.22794	2.31725
26.2652	26.188	26.1178	28.5734	28.6453	28.272			+	SS18-SSX1_GFP		9	6939400000	4.33616	0	2.30658	2.05575	MTCH2	4.33616	2.30658
22.3454	22.7233	23.914	24.9224	25.2132	25.7204			+	SS18-SSX1_GFP		7	555810000	1.91422	0.000648649	2.29114	1.50038	ANAPC1	1.91422	2.29114
23.1498	22.4026	23.3418	24.8398	25.0378	25.8596			+	SS18-SSX1_GFP		2	692670000	2.23983	0.000356923	2.28097	1.60211	EMC8	2.23983	2.28097
26.3318	23.3812	25.754	27.4432	27.0137	27.846			+	SS18-SSX1_GFP		5	3209900000	1.14705	0.00128651	2.27861	1.17806	NDUFA5	1.14705	2.27861
23.5581	22.4324	23.6062	25.3576	24.9663	26.0847			+	SS18-SSX1_GFP		4	608960000	1.96612	0.000652174	2.27061	1.50928	CWC22	1.96612	2.27061
23.7461	22.0287	21.3166	24.6007	24.5329	24.7546			+	SS18-SSX1_GFP		5	371020000	1.45323	0.000752735	2.26563	1.31412	GTF3C5	1.45323	2.26563
21.8466	22.7582	22.2445	24.367	24.2277	25.0429			+	SS18-SSX1_GFP		4	372100000	2.4644	0	2.26281	1.6581	SRCAP	2.4644	2.26281
21.6541	22.5704	22.8331	24.3483	24.3856	25.0749			+	SS18-SSX1_GFP		4	447820000	2.20191	0.000714286	2.25043	1.57553	NAPA	2.20191	2.25043
23.5054	22.9792	23.3181	25.2122	25.4397	25.8953			+	SS18-SSX1_GFP		2	526850000	3.052	0	2.24817	1.79412	POLR2D	3.052	2.24817
22.5039	22.823	22.9527	25.025	24.6813	25.3126			+	SS18-SSX1_GFP		2	513920000	3.24002	0	2.24644	1.8323	RP2	3.24002	2.24644
23.5839	24.332	24.0526	25.9677	26.1107	26.6273			+	SS18-SSX1_GFP		7	1371600000	2.78943	0	2.24571	1.73247	LEMD3	2.78943	2.24571
23.4872	22.8235	23.0026	25.6974	24.9855	25.3672			+	SS18-SSX1_GFP		4	650220000	2.84915	0	2.2456	1.74663	RAE1	2.84915	2.2456
22.8809	23.3224	23.763	25.1781	25.2675	26.2236			+	SS18-SSX1_GFP		5	732170000	2.21959	0.000712166	2.23432	1.57293	GTF3C4	2.21959	2.23432
22.2355	22.7812	22.2715	24.3529	24.6146	25.0142			+	SS18-SSX1_GFP		2	323480000	2.98926	0	2.23117	1.76963	GRWD1	2.98926	2.23117
24.6597	22.0338	22.32	24.927	24.9919	25.7737			+	SS18-SSX1_GFP		7	660370000	1.19586	0.00130582	2.22634	1.18733	NUP188	1.19586	2.22634
23.6824	22.712	25.0124	25.8478	26.1546	26.0826			+	SS18-SSX1_GFP		2	1636000000	1.52663	0.000529801	2.22607	1.33045	MP68	1.52663	2.22607
25.9128	25.9671	25.5821	28.4529	28.2616	27.415			+	SS18-SSX1_GFP		10	6277400000	2.54422	0	2.22248	1.65753	ATP5C1	2.54422	2.22248
26.5331	26.2245	25.9439	28.0609	28.198	29.0968			+	SS18-SSX1_GFP		20	5450500000	2.42358	0.00036478	2.21807	1.62289	AP2A1	2.42358	2.21807
24.5874	22.7509	23.7949	26.3233	26.2339	25.2289			+	SS18-SSX1_GFP		4	1134900000	1.59631	0.000540541	2.21763	1.35461	AP2S1	1.59631	2.21763
25.1188	24.711	22.0595	26.0256	25.961	26.5411			+	SS18-SSX1_GFP		10	1291500000	1.06503	0.00194483	2.21279	1.11957	DARS	1.06503	2.21279
23.038	23.302	24.4223	25.7197	25.2686	26.4095			+	SS18-SSX1_GFP		6	730800000	1.83054	0.000591133	2.21188	1.43758	BAIAP2	1.83054	2.21188
22.3697	23.4642	23.5993	24.9389	25.0474	26.0683			+	SS18-SSX1_GFP		4	708010000	1.85078	0.000597015	2.20715	1.44252	STXBP3	1.85078	2.20715
22.7819	22.3307	23.8898	25.0154	25.2162	25.3867			+	SS18-SSX1_GFP		3	469920000	2.01111	0.000645161	2.20528	1.49463	RAB13	2.01111	2.20528
22.9402	22.1852	23.264	24.6467	24.7417	25.6116			+	SS18-SSX1_GFP		2	478410000	2.11689	0.000662983	2.20351	1.52685	DRG1	2.11689	2.20351
22.2813	22.3871	22.7281	24.5383	24.6557	24.8126			+	SS18-SSX1_GFP		4	381910000	3.83086	0	2.20336	1.90524	CYFIP1	3.83086	2.20336
22.6571	23.2098	25.291	26.289	24.3365	27.1194			+	SS18-SSX1_GFP		4	1247200000	0.889586	0.00481761	2.19567	1.02106	LAMTOR5	0.889586	2.19567
22.8743	22.6654	22.4918	24.3506	24.7876	25.4741			+	SS18-SSX1_GFP		7	463270000	2.50274	0.000370607	2.19362	1.63071	TRRAP	2.50274	2.19362
25.9189	25.6317	24.9041	27.6011	27.6167	27.7976			+	SS18-SSX1_GFP		18	3642000000	2.67962	0	2.1869	1.67129	SKIV2L2	2.67962	2.1869
22.9382	24.7585	24.8097	26.0245	26.1667	26.8724			+	SS18-SSX1_GFP		5	1499000000	1.5105	0.000749455	2.18574	1.30963	DNAJC11	1.5105	2.18574
23.0533	23.8951	22.0908	25.2787	25.1385	25.1747			+	SS18-SSX1_GFP		4	633790000	1.85538	0.000586797	2.18429	1.43427	SPECC1L	1.85538	2.18429
25.6185	26.7881	25.752	28.189	28.0057	28.4673			+	SS18-SSX1_GFP		7	4973000000	2.27708	0.000689655	2.1678	1.55596	NDUFB10	2.27708	2.1678
26.5009	25.5064	25.5664	28.1718	27.6056	28.2981			+	SS18-SSX1_GFP		28	3710000000	2.30577	0.000701754	2.16724	1.56365	PLEC	2.30577	2.16724
22.6384	23.7181	23.8804	25.609	25.6529	25.4578			+	SS18-SSX1_GFP		3	970510000	2.26805	0.000683761	2.16088	1.54986	TMED9	2.26805	2.16088
31.5963	31.5377	31.5683	33.8111	33.827	33.5418			+	SS18-SSX1_GFP		165	260440000000	4.67042	0	2.15923	1.97354	SPTAN1	4.67042	2.15923
24.6796	25.6928	25.3935	26.7197	27.5424	27.9791			+	SS18-SSX1_GFP		12	2827600000	1.97696	0.000620155	2.15847	1.46232	CSNK2A1	1.97696	2.15847
23.4807	23.1344	23.4391	25.4602	25.4624	25.5974			+	SS18-SSX1_GFP		8	903790000	4.27399	0	2.15526	1.92743	NUP153	4.27399	2.15526
25.2988	25.5832	25.6208	27.4422	27.321	28.1723			+	SS18-SSX1_GFP		15	3954400000	2.77912	0	2.14424	1.66914	ATP2A2	2.77912	2.14424
21.9052	22.8212	22.5318	24.5746	24.627	24.4854			+	SS18-SSX1_GFP		2	352150000	2.84409	0	2.14295	1.68279	MPHOSPH6	2.84409	2.14295
26.0168	25.4365	25.7706	27.5612	27.5051	28.5747			+	SS18-SSX1_GFP		15	3415600000	2.28479	0.000679887	2.13898	1.54317	LYN	2.28479	2.13898
22.5753	23.3906	23.6505	25.3046	25.251	25.4598			+	SS18-SSX1_GFP		4	548560000	2.53062	0.000358025	2.13298	1.60389	MBD3	2.53062	2.13298
24.7406	24.8431	24.9192	26.907	26.7563	27.2353			+	SS18-SSX1_GFP		10	1922300000	3.84043	0	2.13189	1.85292	ESYT1	3.84043	2.13189
26.7807	26.2142	26.5763	28.5555	28.5313	28.8486			+	SS18-SSX1_GFP		10	7466800000	3.39661	0	2.12139	1.77597	HACD3	3.39661	2.12139
22.404	23.5374	22.3642	24.613	24.7831	25.2732			+	SS18-SSX1_GFP		4	465930000	2.09577	0.000636605	2.12123	1.48073	ATP13A1	2.09577	2.12123
25.5315	25.9349	25.823	27.8777	27.5677	28.1958			+	SS18-SSX1_GFP		17	3969900000	3.20452	0	2.11723	1.7389	CTNND1	3.20452	2.11723
23.3631	21.2367	22.7966	24.3761	24.4521	24.9065			+	SS18-SSX1_GFP		3	366920000	1.48933	0.000722689	2.1128	1.27507	DNAJC13	1.48933	2.1128
24.8958	24.4303	24.5795	26.3359	26.4719	27.4149			+	SS18-SSX1_GFP		11	1718400000	2.34437	0.000677966	2.1057	1.54153	COPA	2.34437	2.1057
23.1305	23.5355	22.9624	25.0127	25.0855	25.838			+	SS18-SSX1_GFP		2	622620000	2.58765	0.000355828	2.10259	1.60027	PTDSS1	2.58765	2.10259
23.0278	24.7094	23.2362	25.8929	25.4881	25.8948			+	SS18-SSX1_GFP		12	990940000	1.73595	0.000545455	2.10082	1.35865	HIP1	1.73595	2.10082
26.0074	26.1632	25.9768	27.7355	27.8304	28.8586			+	SS18-SSX1_GFP		5	5144700000	2.34209	0.000668524	2.09236	1.53378	SSR4	2.34209	2.09236
26.4446	26.674	26.4827	28.3427	28.4647	29.0616			+	SS18-SSX1_GFP		9	6230800000	3.06638	0	2.08922	1.6942	NDUFA8	3.06638	2.08922
26.3722	26.5968	26.4978	28.1733	28.3261	29.221			+	SS18-SSX1_GFP		10	6236100000	2.47781	0.000699708	2.0845	1.56358	NDUFS3	2.47781	2.0845
23.011	22.5494	22.688	25.3015	25.0318	24.1652			+	SS18-SSX1_GFP		3	565420000	2.3144	0.000659341	2.08337	1.52177	PLGRKT	2.3144	2.08337
23.0537	23.1418	22.7649	25.3287	25.4104	24.4692			+	SS18-SSX1_GFP		8	589160000	2.53195	0.000716418	2.08267	1.57559	GATAD2B	2.53195	2.08267
22.9843	23.0553	22.6665	24.5433	24.8777	25.5312			+	SS18-SSX1_GFP		2	521710000	2.57253	0.000727273	2.08204	1.58481	SURF4	2.57253	2.08204
23.5184	23.6569	23.0787	25.5721	25.6449	25.262			+	SS18-SSX1_GFP		2	1102600000	3.22892	0	2.075	1.71466	USMG5	3.22892	2.075
21.7916	23.5659	22.9938	25.0374	24.7646	24.7711			+	SS18-SSX1_GFP		4	611530000	1.75927	0.000541761	2.0739	1.35502	EMC3	1.75927	2.0739
24.4876	24.2263	24.6715	26.3535	25.9329	27.2516			+	SS18-SSX1_GFP		3	1643700000	2.12696	0.000607595	2.05086	1.45474	NDUFB8	2.12696	2.05086
25.2845	25.0478	25.1873	26.8733	27.0805	27.7077			+	SS18-SSX1_GFP		10	2286900000	2.85138	0.000365931	2.0473	1.62472	CORO1C	2.85138	2.0473
25.1512	24.5128	25.5335	26.7554	26.9258	27.657			+	SS18-SSX1_GFP		13	2065600000	2.13701	0.000610687	2.04692	1.4555	TRIP12	2.13701	2.04692
24.0192	25.1557	22.9884	25.8661	25.9645	26.4565			+	SS18-SSX1_GFP		3	1067200000	1.45392	0.000956175	2.04124	1.23561	LSM2	1.45392	2.04124
23.0422	24.9471	22.3976	25.912	25.8896	24.7079			+	SS18-SSX1_GFP		5	834220000	1.11269	0.00226263	2.04085	1.09574	WDR61	1.11269	2.04085
24.8844	24.3493	24.3547	26.4259	26.2341	27.043			+	SS18-SSX1_GFP		6	1322000000	2.60121	0.000705882	2.03819	1.56574	KIAA1671	2.60121	2.03819
25.6469	25.3791	25.3981	28.3805	28.2531	25.8605			+	SS18-SSX1_GFP		2	4917500000	1.15457	0.00209881	2.02332	1.10921	COX6A1	1.15457	2.02332
24.9671	25.3793	22.6907	26.1112	25.9757	27.0141			+	SS18-SSX1_GFP		10	1505000000	1.05856	0.00311765	2.02131	1.06536	CUL3	1.05856	2.02131
22.9044	22.9442	23.1313	24.3305	24.3944	26.3146			+	SS18-SSX1_GFP		2	430830000	1.43473	0.000932039	2.01987	1.22066	LARP4	1.43473	2.01987
22.8709	25.1962	22.9265	25.4459	25.5874	26.0032			+	SS18-SSX1_GFP		3	830560000	1.20732	0.00141958	2.01429	1.12905	TIA1	1.20732	2.01429
23.1002	23.3191	22.096	25.1119	24.8433	24.6018			+	SS18-SSX1_GFP		3	678830000	2.11956	0.000585366	2.01389	1.43405	MGST1	2.11956	2.01389
25.1	25.0265	24.9522	27.0987	27.1053	26.9163			+	SS18-SSX1_GFP		5	2061100000	4.93717	0	2.01384	1.87299	SOAT1	4.93717	2.01384
25.5605	25.6877	25.9303	27.9669	27.9987	27.2355			+	SS18-SSX1_GFP		18	3598800000	2.74661	0.000718563	2.00756	1.57847	CTTN	2.74661	2.00756
21.9401	23.0051	23.3535	24.5216	24.6556	25.1189			+	SS18-SSX1_GFP		4	389720000	1.9072	0.000552995	1.99914	1.36735	HTATSF1	1.9072	1.99914
22.9451	22.5186	22.6078	24.4809	24.407	25.1708			+	SS18-SSX1_GFP		5	321200000	2.7137	0.000703812	1.99572	1.56439	CKAP5	2.7137	1.99572
24.9707	26.0026	22.5536	26.2407	26.2185	27.0512			+	SS18-SSX1_GFP		6	1309400000	0.877681	0.00773692	1.99447	0.969065	AURKB	0.877681	1.99447
22.1287	22.9199	21.3011	23.9786	24.1184	24.2339			+	SS18-SSX1_GFP		2	276750000	1.86816	0.000539326	1.99373	1.35336	PPP2R1A	1.86816	1.99373
29.5434	29.3024	29.2794	31.3199	31.2084	31.5726			+	SS18-SSX1_GFP		28	60547000000	3.88721	0	1.9919	1.75209	ATP5A1	3.88721	1.9919
23.8275	22.8337	23.0396	24.9606	24.8011	25.9077			+	SS18-SSX1_GFP		5	585890000	1.90886	0.000550459	1.98954	1.36334	SRP72	1.90886	1.98954
24.7659	23.0845	22.7839	25.3793	25.4645	25.7556			+	SS18-SSX1_GFP		4	894720000	1.4706	0.000933852	1.98842	1.22203	EXOSC4	1.4706	1.98842
22.6425	22.7287	24.945	25.3536	25.2669	25.6425			+	SS18-SSX1_GFP		3	849410000	1.22204	0.00177778	1.98223	1.12496	THOC3	1.22204	1.98223
25.2948	25.0249	25.3468	27.1704	27.0103	27.4316			+	SS18-SSX1_GFP		16	2128200000	3.63169	0	1.98194	1.71123	TFIP11	3.63169	1.98194
23.1496	23.7385	23.06	25.2354	25.2063	25.4318			+	SS18-SSX1_GFP		3	710130000	3.03734	0.000361371	1.97515	1.61328	NDUFB6	3.03734	1.97515
28.0194	27.4212	27.8316	29.5493	29.4076	30.2395			+	SS18-SSX1_GFP		35	13882000000	2.49716	0.000650407	1.97467	1.50529	MYO1D	2.49716	1.97467
26.4974	26.3368	26.3299	28.628	28.4853	27.961			+	SS18-SSX1_GFP		6	7097900000	3.14287	0.000367089	1.9701	1.62814	RPL21	3.14287	1.9701
25.6323	23.3017	25.5408	26.6188	26.6085	27.1549			+	SS18-SSX1_GFP		11	2438200000	1.18212	0.00208814	1.96911	1.1043	NDUFA12	1.18212	1.96911
26.4795	26.2658	26.5749	28.3631	28.3208	28.5352			+	SS18-SSX1_GFP		30	5620800000	4.20197	0	1.96632	1.76755	MKI67	4.20197	1.96632
25.3121	24.9216	22.25	26.1901	26.0481	26.122			+	SS18-SSX1_GFP		9	1703800000	0.95188	0.00641718	1.95886	0.997834	HADHB	0.95188	1.95886
21.8245	22.6699	23.6855	24.5352	24.3329	25.1613			+	SS18-SSX1_GFP		3	355250000	1.51908	0.000935673	1.94981	1.22402	PCID2	1.51908	1.94981
24.8968	25.8915	23.47	26.6954	26.765	26.6366			+	SS18-SSX1_GFP		5	2048800000	1.29626	0.00144484	1.94623	1.14236	RALA	1.29626	1.94623
24.8251	25.1822	25.1563	26.989	27.0522	26.9604			+	SS18-SSX1_GFP		4	2403000000	4.1001	0	1.946	1.74046	LAMTOR1	4.1001	1.946
23.3197	22.3563	23.1562	24.6567	24.7442	25.2684			+	SS18-SSX1_GFP		5	538890000	2.27392	0.000589681	1.9457	1.43737	FAR1	2.27392	1.9457
24.7811	25.2828	25.537	27.7653	27.1684	26.4961			+	SS18-SSX1_GFP		12	3195000000	1.97665	0.000547945	1.94293	1.36002	CCDC47	1.97665	1.94293
24.3221	22.5128	22.7166	24.93	25.0211	25.4195			+	SS18-SSX1_GFP		8	660460000	1.51524	0.000928433	1.93975	1.21875	KIDINS220	1.51524	1.93975
22.6741	23.4463	22.7302	24.6026	24.8302	25.2344			+	SS18-SSX1_GFP		2	456220000	2.4787	0.000634921	1.93887	1.48038	MRPL4	2.4787	1.93887
22.838	24.1103	23.1444	25.5116	25.2819	25.1058			+	SS18-SSX1_GFP		4	719660000	2.07167	0.000562061	1.93552	1.38156	ATP6V0A1	2.07167	1.93552
25.2159	25.3726	24.9715	27.0764	27.2852	26.9869			+	SS18-SSX1_GFP		5	2410000000	3.71821	0	1.92948	1.68311	MPC2	3.71821	1.92948
23.2723	22.4991	22.0175	24.2463	24.2028	25.1236			+	SS18-SSX1_GFP		2	377560000	1.82023	0.000747826	1.92794	1.30903	HSD17B12	1.82023	1.92794
22.8349	21.1534	24.5598	24.7643	24.1511	25.3999			+	SS18-SSX1_GFP		4	614390000	0.852849	0.00957681	1.92239	0.938969	EIF3I	0.852849	1.92239
23.5797	24.0642	23.917	25.4275	25.5164	26.3766			+	SS18-SSX1_GFP		5	803510000	2.33858	0.000592593	1.91988	1.43821	NOP9	2.33858	1.91988
23.6562	22.7114	22.6934	24.6769	24.8082	25.3309			+	SS18-SSX1_GFP		4	568570000	2.15864	0.000567376	1.91835	1.39466	MRPS22	2.15864	1.91835
26.1591	26.5694	26.4886	28.1544	27.9569	28.8202			+	SS18-SSX1_GFP		22	4835600000	2.55749	0.000631579	1.90483	1.47692	SCRIB	2.55749	1.90483
23.9413	24.6051	23.0501	25.3983	25.8128	26.0811			+	SS18-SSX1_GFP		6	853320000	1.7398	0.000718163	1.89855	1.2722	CDC16	1.7398	1.89855
24.6498	23.0707	23.3198	24.8283	25.6148	26.2908			+	SS18-SSX1_GFP		7	727220000	1.36957	0.00146306	1.89787	1.15222	CAD	1.36957	1.89787
24.9975	24.9413	25.1103	26.5574	26.8706	27.2376			+	SS18-SSX1_GFP		5	1786300000	3.11655	0.000691643	1.87216	1.55656	TIMM50	3.11655	1.87216
24.9811	25.2661	25.2491	26.9479	27.2507	26.9131			+	SS18-SSX1_GFP		8	3820500000	3.72478	0.000374194	1.87181	1.63985	UQCRQ	3.72478	1.87181
26.2994	26.1912	25.9246	28.0592	28.0297	27.9321			+	SS18-SSX1_GFP		14	3381200000	4.03485	0	1.86862	1.6717	BRD9	4.03485	1.86862
27.3683	27.3128	27.2792	28.9687	29.0167	29.5799			+	SS18-SSX1_GFP		23	9055800000	3.15339	0.000693642	1.86837	1.55966	THOC2	3.15339	1.86837
24.4355	22.8783	23.2004	25.1426	25.2344	25.7419			+	SS18-SSX1_GFP		6	654400000	1.66752	0.000958084	1.86819	1.23733	ANAPC5	1.66752	1.86819
24.5976	24.4725	24.5632	26.3338	26.3284	26.5715			+	SS18-SSX1_GFP		7	1277300000	4.52654	0	1.86678	1.71514	RIF1	4.52654	1.86678
23.327	23.641	23.5342	25.3966	25.0008	25.6982			+	SS18-SSX1_GFP		7	672590000	2.95903	0.000661157	1.86447	1.52582	SLC12A2	2.95903	1.86447
22.3555	23.4509	22.1196	24.3399	24.2164	24.9414			+	SS18-SSX1_GFP		5	417090000	1.78313	0.000713693	1.85721	1.26575	ABCB10	1.78313	1.85721
23.4666	24.0015	22.7491	25.1799	25.2876	25.3118			+	SS18-SSX1_GFP		2	695290000	2.14946	0.000544218	1.85402	1.35818	TOR1AIP1	2.14946	1.85402
23.0826	23.9897	23.0115	25.4611	25.1824	24.975			+	SS18-SSX1_GFP		5	728260000	2.22983	0.000556845	1.8449	1.37175	RAP1B	2.22983	1.8449
24.557	24.8356	25.2992	26.8086	26.9524	26.4262			+	SS18-SSX1_GFP		5	2807900000	2.62396	0.0006	1.83181	1.44531	BSG	2.62396	1.83181
26.6115	26.5646	25.836	28.3359	28.5267	27.637			+	SS18-SSX1_GFP		23	6917300000	2.11231	0.000532151	1.82919	1.33616	CKAP4	2.11231	1.82919
24.1227	24.4687	22.6098	25.5034	25.0377	26.1442			+	SS18-SSX1_GFP		5	817640000	1.30796	0.00209168	1.82801	1.10472	GK	1.30796	1.82801
21.742	22.8114	22.6237	23.9223	23.8647	24.8731			+	SS18-SSX1_GFP		4	268460000	1.76922	0.000973631	1.82765	1.24813	NCAPD2	1.76922	1.82765
28.2917	27.6467	27.9266	29.7553	29.7026	29.8893			+	SS18-SSX1_GFP		46	14741000000	3.14276	0.000666667	1.8274	1.52942	MYO18A	3.14276	1.8274
26.0721	25.978	25.8943	27.6726	27.5763	28.1435			+	SS18-SSX1_GFP		13	3728100000	3.24088	0.000672269	1.81598	1.53556	CAND1	3.24088	1.81598
24.0076	23.4799	23.979	25.1991	25.22	26.4729			+	SS18-SSX1_GFP		6	898680000	1.78415	0.000965795	1.80848	1.2432	AHCTF1	1.78415	1.80848
23.4496	21.8782	22.1865	24.2843	23.9355	24.7128			+	SS18-SSX1_GFP		5	312890000	1.56556	0.00129851	1.80612	1.17994	FANCI	1.56556	1.80612
22.7227	23.0668	22.2968	23.8979	24.2433	25.3415			+	SS18-SSX1_GFP		2	313450000	1.67336	0.000917782	1.79879	1.20815	ARPC3	1.67336	1.79879
28.1756	27.8918	28.0839	29.8301	29.8867	29.827			+	SS18-SSX1_GFP		20	14503000000	4.5123	0	1.7975	1.6554	SSRP1	4.5123	1.7975
22.901	22.9843	22.9115	24.5165	24.4763	25.1465			+	SS18-SSX1_GFP		3	386030000	2.9082	0.000618557	1.78082	1.46137	HLTF	2.9082	1.78082
23.1012	23.2484	22.1918	24.4863	24.2334	25.1554			+	SS18-SSX1_GFP		6	356740000	1.84072	0.000967742	1.77791	1.24336	NIPBL	1.84072	1.77791
25.1062	23.6588	24.7364	26.0561	26.4257	26.353			+	SS18-SSX1_GFP		8	1243200000	1.77885	0.000944882	1.77779	1.22722	PAF1	1.77885	1.77779
25.4265	25.9373	21.885	26.1279	26.0781	26.3725			+	SS18-SSX1_GFP		6	1298800000	0.625827	0.0273177	1.77656	0.780065	ATP6V0D1	0.625827	1.77656
25.7995	25.6295	25.3269	27.0411	27.1096	27.9334			+	SS18-SSX1_GFP		13	2456400000	2.29619	0.000538117	1.77606	1.34727	CDC27	2.29619	1.77606
25.8061	23.5266	25.8821	26.7512	26.8931	26.8942			+	SS18-SSX1_GFP		26	2071300000	1.07738	0.00625578	1.77457	1.00017	ATAD3B	1.07738	1.77457
22.4639	22.6329	23.5384	24.3851	24.4039	25.1613			+	SS18-SSX1_GFP		2	391910000	1.86887	0.00097166	1.77175	1.24747	FNBP4	1.86887	1.77175
25.0688	25.0917	24.7979	26.4373	26.7307	27.0868			+	SS18-SSX1_GFP		22	1670600000	2.95906	0.000615385	1.76543	1.45885	HNRNPK	2.95906	1.76543
22.3237	22.3175	22.7958	23.9363	24.164	24.6279			+	SS18-SSX1_GFP		2	308510000	2.62145	0.00056872	1.76374	1.40216	FARP1	2.62145	1.76374
26.1866	26.0946	24.9008	27.5982	27.358	27.5109			+	SS18-SSX1_GFP		21	2868300000	1.86137	0.000961924	1.7617	1.2406	POLR2A	1.86137	1.7617
24.5319	23.5356	22.2909	25.211	24.9086	25.5163			+	SS18-SSX1_GFP		6	701990000	1.2304	0.00358199	1.75917	1.05241	ARHGEF2	1.2304	1.75917
24.4836	24.3472	22.2486	25.6264	25.213	25.5135			+	SS18-SSX1_GFP		6	910620000	1.12656	0.00546082	1.75781	1.01385	IGF2BP3	1.12656	1.75781
23.7557	25.3744	23.4155	25.7245	25.7051	26.3802			+	SS18-SSX1_GFP		2	1037200000	1.27841	0.00312275	1.75472	1.0675	NDUFAF4	1.27841	1.75472
24.3537	22.705	22.6802	24.6328	24.7858	25.5792			+	SS18-SSX1_GFP		3	486830000	1.31033	0.00274834	1.75294	1.07765	RCN2	1.31033	1.75294
25.7465	26.0305	25.9343	27.4654	27.4678	28.0348			+	SS18-SSX1_GFP		12	3677900000	2.97211	0.000604534	1.75224	1.45179	FLOT1	2.97211	1.75224
22.7971	23.1154	24.9092	25.4145	25.0852	25.5727			+	SS18-SSX1_GFP		12	777050000	1.22191	0.00374522	1.75025	1.04621	GNB4	1.22191	1.75025
29.9077	29.8562	29.9457	31.7183	31.6341	31.5985			+	SS18-SSX1_GFP		34	42163000000	5.61905	0	1.7471	1.67347	XRCC6	5.61905	1.7471
22.866	22.2263	23.4495	24.6697	24.4801	24.6325			+	SS18-SSX1_GFP		4	473380000	2.08833	0.000735043	1.74682	1.28638	RAB35	2.08833	1.74682
23.8779	22.7293	23.2038	24.8069	25.2467	24.9957			+	SS18-SSX1_GFP		2	520030000	2.09277	0.000736617	1.74608	1.28695	RRAS2	2.09277	1.74608
27.4079	27.4829	27.4096	29.0218	28.9535	29.5585			+	SS18-SSX1_GFP		13	9268900000	3.08191	0.000621762	1.74441	1.46236	RBBP7	3.08191	1.74441
27.3142	26.9548	26.7724	28.76	28.9031	28.6101			+	SS18-SSX1_GFP		24	10620000000	3.19492	0.000633245	1.74396	1.47763	ATP1A1	3.19492	1.74396
23.4515	23.2096	22.137	24.67	24.6994	24.6558			+	SS18-SSX1_GFP		5	465130000	1.90191	0.000963855	1.74236	1.24087	FAM208A	1.90191	1.74236
22.9451	23.0996	22.5353	24.5024	24.454	24.8482			+	SS18-SSX1_GFP		4	403200000	2.94402	0.000594059	1.74155	1.44025	UTP18	2.94402	1.74155
23.3734	23.4832	23.4291	24.8502	24.7808	25.8695			+	SS18-SSX1_GFP		4	511570000	2.10073	0.000733475	1.73825	1.28444	ORC5	2.10073	1.73825
23.2446	24.3178	22.8072	25.0091	24.9986	25.5538			+	SS18-SSX1_GFP		6	525600000	1.63126	0.00127239	1.73062	1.16559	CNOT1	1.63126	1.73062
23.121	22.6515	22.0847	24.1417	24.1614	24.7404			+	SS18-SSX1_GFP		2	294090000	2.0714	0.000719665	1.72877	1.27284	ATP6V1E1	2.0714	1.72877
25.0575	25.1416	22.767	25.7781	25.7416	26.6216			+	SS18-SSX1_GFP		21	1116000000	0.974629	0.00911466	1.72502	0.942986	SMARCA1	0.974629	1.72502
25.4222	25.6363	25.4205	27.0112	26.8688	27.7665			+	SS18-SSX1_GFP		11	2264800000	2.4079	0.000534521	1.72248	1.33772	NCBP1	2.4079	1.72248
22.8089	22.6577	22.4508	24.1178	24.1269	24.8393			+	SS18-SSX1_GFP		6	422290000	2.56613	0.000551724	1.72222	1.36624	NCKAP1	2.56613	1.72222
25.2982	25.3673	23.1735	26.2708	26.01	26.7234			+	SS18-SSX1_GFP		6	1497500000	1.07974	0.00734446	1.72169	0.984058	ZNF326	1.07974	1.72169
23.487	22.8621	22.548	24.3848	24.6094	25.0595			+	SS18-SSX1_GFP		4	369230000	2.14313	0.000730361	1.71888	1.28288	UFL1	2.14313	1.71888
24.5788	25.068	24.8675	26.5646	26.2812	26.8246			+	SS18-SSX1_GFP		10	1641600000	2.90301	0.000581114	1.7187	1.4185	CHD1	2.90301	1.7187
27.1891	26.915	27.3058	28.6574	28.7101	29.1706			+	SS18-SSX1_GFP		16	8077400000	2.98805	0.000582524	1.7094	1.42455	ABCD3	2.98805	1.7094
23.6963	22.3131	24.7564	25.1597	25.3793	25.3462			+	SS18-SSX1_GFP		5	687020000	1.12922	0.00640735	1.70646	0.997528	PPP1R18	1.12922	1.70646
24.7254	25.0114	24.9754	26.6376	26.5399	26.6335			+	SS18-SSX1_GFP		9	1369800000	4.2337	0.000685714	1.69959	1.55154	KIF23	4.2337	1.69959
23.4049	22.663	23.0253	24.9712	24.7658	24.4439			+	SS18-SSX1_GFP		2	478810000	2.52327	0.000535714	1.6959	1.34224	ATP6V0A2	2.52327	1.6959
23.0822	24.8479	24.6781	25.8276	25.8371	26.0229			+	SS18-SSX1_GFP		6	1188400000	1.39494	0.00275748	1.69314	1.0812	GPC4	1.39494	1.69314
23.4099	25.6235	21.8192	25.1282	25.032	25.7568			+	SS18-SSX1_GFP		6	828310000	0.681336	0.0247209	1.68809	0.79392	YME1L1	0.681336	1.68809
21.8568	23.0395	22.7533	24.5638	24.2874	23.8448			+	SS18-SSX1_GFP		3	485690000	1.81772	0.00130827	1.68216	1.19028	OXA1L	1.81772	1.68216
22.5591	22.6116	22.6871	24.2069	23.6901	25.0062			+	SS18-SSX1_GFP		2	251450000	1.92279	0.000926641	1.68177	1.21459	PSMD8	1.92279	1.68177
27.2666	26.9638	27.2918	28.9981	28.8114	28.688			+	SS18-SSX1_GFP		18	8961300000	3.55257	0.000612245	1.65847	1.45648	TMPO	3.55257	1.65847
23.4184	23.4596	23.038	25.0789	25.0743	24.7289			+	SS18-SSX1_GFP		3	607820000	3.13503	0.000571429	1.65537	1.40607	NDUFS6	3.13503	1.65537
24.1151	22.286	23.7771	25.0114	24.9479	25.1827			+	SS18-SSX1_GFP		4	602670000	1.36494	0.00360518	1.65457	1.05639	HS2ST1	1.36494	1.65457
22.8812	22.9978	23.0715	24.2432	24.2653	25.4004			+	SS18-SSX1_GFP		2	354320000	1.89144	0.00111909	1.65281	1.19242	P4HB	1.89144	1.65281
22.343	23.2675	23.0316	24.7323	24.2163	24.6436			+	SS18-SSX1_GFP		2	281330000	2.17378	0.00097561	1.65003	1.25018	SATB2	2.17378	1.65003
24.89	25.5212	22.8554	25.7071	25.8666	26.6418			+	SS18-SSX1_GFP		6	1002100000	0.900477	0.0127956	1.64964	0.889509	CBX5	0.900477	1.64964
26.6432	26.6367	26.9447	28.0797	28.1047	28.9873			+	SS18-SSX1_GFP		10	6304900000	2.19516	0.000702041	1.64903	1.25377	SLC25A1	2.19516	1.64903
27.1428	27.2905	27.2	28.8125	28.8425	28.9237			+	SS18-SSX1_GFP		8	10188000000	5.15256	0.000697674	1.64846	1.56349	ATP5O	5.15256	1.64846
24.7539	24.4913	24.8645	26.2873	26.0742	26.687			+	SS18-SSX1_GFP		10	1377900000	2.83712	0.000546697	1.64628	1.35948	IPO5	2.83712	1.64628
24.959	24.9315	24.8125	26.2745	26.1464	27.2195			+	SS18-SSX1_GFP		7	1455300000	2.06986	0.000943026	1.64576	1.22695	RFC1	2.06986	1.64576
28.8843	28.8181	29.08	30.5714	30.5268	30.6117			+	SS18-SSX1_GFP		54	27090000000	4.42846	0.000655738	1.6425	1.51753	CLTC	4.42846	1.6425
25.502	25.5069	25.1555	26.8697	26.441	27.7682			+	SS18-SSX1_GFP		10	2000400000	1.7979	0.00126776	1.63815	1.16348	HDAC2	1.7979	1.63815
25.1737	24.8325	24.7523	26.3681	26.7021	26.602			+	SS18-SSX1_GFP		11	1394700000	3.26115	0.000572792	1.63791	1.40867	DDX42	3.26115	1.63791
22.7215	23.5623	22.3668	24.1978	24.3824	24.9577			+	SS18-SSX1_GFP		3	328060000	1.7417	0.00145259	1.62911	1.14573	CSK	1.7417	1.62911
26.9734	26.6764	26.7459	28.3174	28.2848	28.6728			+	SS18-SSX1_GFP		9	6470200000	3.35055	0.000574163	1.62643	1.41031	VDAC3	3.35055	1.62643
23.5575	22.9609	23.8352	25.2633	25.194	24.7728			+	SS18-SSX1_GFP		5	661690000	2.25001	0.000977597	1.62552	1.25039	VAPB	2.25001	1.62552
23.8837	24.0044	23.7871	25.5069	25.4142	25.6253			+	SS18-SSX1_GFP		6	620500000	4.3008	0.000643432	1.62372	1.49284	CHAMP1	4.3008	1.62372
22.8789	23.1504	24.2144	24.8566	24.8145	25.4393			+	SS18-SSX1_GFP		6	582160000	1.63034	0.00192821	1.62218	1.11514	RPRD1A	1.63034	1.62218
24.3927	24.1844	24.6036	25.7314	25.6963	26.6036			+	SS18-SSX1_GFP		7	1016700000	2.13926	0.000939335	1.61682	1.22442	AQR	2.13926	1.61682
23.4158	22.5154	22.7144	24.0618	24.1316	25.2909			+	SS18-SSX1_GFP		4	380110000	1.53927	0.00257286	1.61288	1.08744	TFRC	1.53927	1.61288
24.3217	24.5388	24.6388	26.1516	26.0149	26.1691			+	SS18-SSX1_GFP		2	1133900000	3.9703	0.000613811	1.61212	1.45824	LSM3	3.9703	1.61212
22.6447	22.2482	22.7225	23.8106	24.1053	24.5328			+	SS18-SSX1_GFP		3	291540000	2.48722	0.000728814	1.61113	1.28275	SLC4A7	2.48722	1.61113
22.7663	25.7962	25.893	26.4921	26.1879	26.5737			+	SS18-SSX1_GFP		10	1844000000	0.706572	0.0260025	1.59937	0.786643	RBM10	0.706572	1.59937
25.1351	25.1426	25.2193	26.5512	26.4742	27.2518			+	SS18-SSX1_GFP		13	1972500000	2.51507	0.000725738	1.59338	1.27591	LOC102724159	2.51507	1.59338
22.666	23.523	22.4589	24.2145	24.4666	24.7379			+	SS18-SSX1_GFP		7	409600000	1.942	0.00128177	1.59037	1.1702	GCN1	1.942	1.59037
24.7681	22.3674	21.9887	24.7244	24.4658	24.7009			+	SS18-SSX1_GFP		3	533700000	0.843847	0.0174233	1.58889	0.847793	EXOSC5	0.843847	1.58889
26.5552	26.638	26.6887	28.3768	28.2124	28.0531			+	SS18-SSX1_GFP		10	6705800000	4.01454	0.000595533	1.58679	1.44094	TECR	4.01454	1.58679
22.5158	23.2221	22.4128	24.3117	24.4194	24.1774			+	SS18-SSX1_GFP		2	279150000	2.41396	0.000704918	1.5859	1.25486	COPG1	2.41396	1.5859
25.3954	25.4555	25.3349	27.1892	26.9566	26.7969			+	SS18-SSX1_GFP		12	2298200000	3.73487	0.00057971	1.58564	1.41686	ZC3H11A	3.73487	1.58564
24.6136	24.7402	24.8284	26.1474	26.1729	26.6164			+	SS18-SSX1_GFP		3	1350500000	3.18734	0.000549199	1.58482	1.3609	LRRC59	3.18734	1.58482
24.4978	24.6462	23.3091	25.3031	25.6293	26.2741			+	SS18-SSX1_GFP		5	839540000	1.44302	0.00357624	1.58445	1.04907	LEO1	1.44302	1.58445
22.7816	22.488	22.4067	23.8325	23.8439	24.7504			+	SS18-SSX1_GFP		3	232080000	2.08725	0.00112548	1.58351	1.19537	AATF	2.08725	1.58351
25.5035	25.7304	25.4733	26.9825	27.0834	27.3914			+	SS18-SSX1_GFP		15	2419400000	3.3717	0.000559441	1.58337	1.38005	DHX30	3.3717	1.58337
25.1791	25.1244	25.9396	27.0185	27.3641	26.6078			+	SS18-SSX1_GFP		17	2682900000	2.00723	0.00129128	1.58243	1.17911	PPP1R12A	2.00723	1.58243
25.6655	25.4039	25.5078	27.036	27.1427	27.1247			+	SS18-SSX1_GFP		12	2265100000	4.34542	0.000609137	1.57541	1.45482	VCP	4.34542	1.57541
27.6543	27.5031	27.4158	28.8781	28.5783	29.8388			+	SS18-SSX1_GFP		14	9671300000	1.81836	0.0014321	1.574	1.13523	LBR	1.81836	1.574
24.6445	24.5698	24.0578	25.723	25.8616	26.3697			+	SS18-SSX1_GFP		6	987960000	2.35458	0.000946746	1.56072	1.22939	COPB1	2.35458	1.56072
24.1057	24.4177	24.5385	26.5323	26.4425	24.7656			+	SS18-SSX1_GFP		6	1834800000	1.24362	0.00750303	1.5595	0.981555	TMEM33	1.24362	1.5595
27.2494	27.0848	26.6926	28.5962	28.5511	28.548			+	SS18-SSX1_GFP		10	7055900000	3.14298	0.000530973	1.55618	1.33475	SAMM50	3.14298	1.55618
25.4904	25.7176	25.684	26.9601	26.8673	27.7193			+	SS18-SSX1_GFP		7	2556500000	2.29079	0.000923077	1.55154	1.2131	C14orf166	2.29079	1.55154
23.3025	23.1583	22.658	24.1137	23.9469	25.7012			+	SS18-SSX1_GFP		4	357070000	1.22767	0.00778346	1.54765	0.972037	BRD1	1.22767	1.54765
26.5165	26.876	26.49	28.1373	28.3174	28.0565			+	SS18-SSX1_GFP		23	5576500000	3.33829	0.000536913	1.5429	1.34583	AP2B1	3.33829	1.5429
22.3304	22.8692	24.3452	24.0772	24.6164	25.4779			+	SS18-SSX1_GFP		4	371470000	0.994327	0.0123773	1.54225	0.892818	POLR2E	0.994327	1.54225
23.4804	22.4387	25.0201	25.0823	25.1817	25.2763			+	SS18-SSX1_GFP		6	773910000	0.954807	0.0135652	1.53371	0.875463	PAICS	0.954807	1.53371
23.1091	23.0349	21.9293	25.061	24.6069	22.9946			+	SS18-SSX1_GFP		1	423130000	0.976722	0.0134102	1.52972	0.882233	MMGT1	0.976722	1.52972
26.2869	25.2466	26.3992	27.7723	27.3144	27.4311			+	SS18-SSX1_GFP		11	2958100000	1.75632	0.00208108	1.52838	1.09814	HDAC1	1.75632	1.52838
22.2228	23.5599	22.6249	24.1545	24.032	24.7912			+	SS18-SSX1_GFP		3	278400000	1.52649	0.00387917	1.52335	1.04288	DHX38	1.52649	1.52335
22.754	23.0488	22.2611	23.917	24.1784	24.5277			+	SS18-SSX1_GFP		2	283560000	2.19803	0.00128889	1.51975	1.1781	CLASP2	2.19803	1.51975
28.2266	27.8203	27.9781	29.5029	29.7139	29.36			+	SS18-SSX1_GFP		7	14866000000	3.19602	0.000751092	1.51727	1.31171	COX5A	3.19602	1.51727
26.2723	26.0665	26.1088	27.482	27.3265	28.1481			+	SS18-SSX1_GFP		8	3138800000	2.35375	0.00112121	1.50296	1.19313	HNRNPAB	2.35375	1.50296
25.958	25.1312	25.5207	26.8416	26.7996	27.4775			+	SS18-SSX1_GFP		9	2105600000	2.01021	0.00142707	1.50291	1.13494	PAXBP1	2.01021	1.50291
26.6717	26.8064	26.833	28.6936	28.4204	27.688			+	SS18-SSX1_GFP		10	5900100000	2.10035	0.00145781	1.49699	1.14769	NDUFS2	2.10035	1.49699
23.3857	23.2325	23.1848	24.3527	24.8929	25.0246			+	SS18-SSX1_GFP		2	436270000	2.64709	0.000941176	1.48904	1.22625	MRPS35	2.64709	1.48904
23.198	23.1735	23.1581	24.5744	24.4052	25.0134			+	SS18-SSX1_GFP		3	416410000	2.9176	0.000709278	1.48782	1.25917	TOE1	2.9176	1.48782
24.271	23.3254	22.2729	24.4873	24.2923	25.5497			+	SS18-SSX1_GFP		4	414250000	1.00065	0.0136022	1.4866	0.876071	CDC42BPA	1.00065	1.4866
22.1276	22.4091	23.6986	24.4565	24.2125	24.0219			+	SS18-SSX1_GFP		2	270350000	1.38656	0.00650837	1.48521	0.990317	RPA2	1.38656	1.48521
29.5953	29.7025	29.6806	31.0857	30.9514	31.3762			+	SS18-SSX1_GFP		40	38042000000	3.47298	0.000746204	1.47833	1.30877	EFTUD2	3.47298	1.47833
28.0321	28.1315	28.1284	29.4774	29.5567	29.6748			+	SS18-SSX1_GFP		30	12626000000	4.6216	0.000560748	1.4723	1.38115	SUPT16H	4.6216	1.4723
26.0385	25.4533	25.2552	26.8932	26.9612	27.3089			+	SS18-SSX1_GFP		11	2525600000	2.271	0.00126087	1.4721	1.1609	AP2M1	2.271	1.4721
23.0873	22.6094	23.2699	23.9996	24.1914	25.1779			+	SS18-SSX1_GFP		2	322080000	1.61885	0.00385466	1.46745	1.03726	EXOSC2	1.61885	1.46745
22.8241	22.7723	23.445	23.9755	24.3067	25.1577			+	SS18-SSX1_GFP		4	283540000	1.62304	0.00386076	1.46614	1.03752	PIK3C2A	1.62304	1.46614
26.1485	26.0233	26.2478	27.5427	27.5778	27.6739			+	SS18-SSX1_GFP		12	3289300000	4.36443	0.000542986	1.45827	1.35542	GNAS	4.36443	1.45827
24.919	24.6383	25.1394	26.4693	26.0487	26.5514			+	SS18-SSX1_GFP		9	1864100000	2.62414	0.000916031	1.45754	1.20185	VAPA	2.62414	1.45754
23.9801	23.5543	22.0768	25.0567	25.5145	23.3981			+	SS18-SSX1_GFP		3	702860000	0.775034	0.0275457	1.4527	0.779473	TOMM5	0.775034	1.4527
26.4819	26.5716	26.9158	27.8272	27.7741	28.7044			+	SS18-SSX1_GFP		10	4632300000	1.92826	0.00256856	1.44546	1.08733	RBMX	1.92826	1.44546
30.5864	30.4935	30.7102	31.8198	31.8331	32.4698			+	SS18-SSX1_GFP		94	70522000000	2.5298	0.00130093	1.44417	1.18039	SNRNP200	2.5298	1.44417
22.1975	23.0589	22.2983	23.8259	23.9365	24.1121			+	SS18-SSX1_GFP		2	185140000	2.14491	0.00194819	1.43992	1.12111	TFAP2A	2.14491	1.43992
26.201	25.932	26.2034	27.6581	27.514	27.4766			+	SS18-SSX1_GFP		10	3622300000	3.7714	0.000741379	1.43744	1.30003	SF3A3	3.7714	1.43744
22.5302	22.3405	23.253	23.986	24.1545	24.2955			+	SS18-SSX1_GFP		6	358730000	2.10141	0.00210239	1.4374	1.11251	NEFL	2.10141	1.4374
22.6064	23.0784	23.087	24.3767	24.3479	24.3513			+	SS18-SSX1_GFP		3	322040000	3.07763	0.00096	1.43471	1.23784	AP3B1	3.07763	1.43471
25.9843	26.3101	26.1611	27.7026	27.4823	27.5709			+	SS18-SSX1_GFP		14	3307500000	3.64032	0.000738197	1.43346	1.28696	XPO1	3.64032	1.43346
25.2965	24.9222	22.8164	25.637	25.7302	25.9627			+	SS18-SSX1_GFP		6	1048200000	0.855215	0.023281	1.43163	0.805199	EIF3H	0.855215	1.43163
26.2488	25.7516	26.3928	27.5764	27.4953	27.6139			+	SS18-SSX1_GFP		4	2849100000	2.71624	0.00112334	1.43081	1.19496	LSM4	2.71624	1.43081
24.3142	24.85	22.9945	25.0535	25.386	25.9952			+	SS18-SSX1_GFP		4	720010000	1.08706	0.0133918	1.42538	0.88179	IPO7	1.08706	1.42538
23.2032	22.8476	22.3633	24.1434	24.001	24.5347			+	SS18-SSX1_GFP		7	342270000	2.08978	0.0020846	1.42171	1.10121	YWHAB	2.08978	1.42171
26.0429	25.6651	25.6786	27.2267	27.1323	27.2878			+	SS18-SSX1_GFP		6	2136800000	3.37672	0.000703476	1.4201	1.25479	TARDBP	3.37672	1.4201
26.9624	26.8671	26.702	28.1697	28.1983	28.4164			+	SS18-SSX1_GFP		12	5311300000	3.69723	0.000727273	1.41762	1.27843	DDX39B	3.69723	1.41762
22.8728	23.283	21.5526	23.7425	23.7247	24.487			+	SS18-SSX1_GFP		3	230750000	1.14888	0.0120898	1.41531	0.896145	XPO5	1.14888	1.41531
24.8075	25.0891	25.6912	26.4011	26.509	26.9196			+	SS18-SSX1_GFP		7	1606600000	2.0117	0.00276667	1.41397	1.08372	PPP1R10	2.0117	1.41397
24.6949	24.987	24.8142	25.9385	26.0912	26.7015			+	SS18-SSX1_GFP		6	1006900000	2.32741	0.00142207	1.41172	1.13117	SCML2	2.32741	1.41172
26.4337	25.9753	26.5105	27.7035	27.615	27.8336			+	SS18-SSX1_GFP		17	3311600000	2.85589	0.00112762	1.41084	1.1969	POLR2B	2.85589	1.41084
24.9515	24.0585	24.7903	26.2688	26.1564	25.6028			+	SS18-SSX1_GFP		12	1289800000	1.82984	0.00357051	1.40923	1.04906	mitochondrial	1.82984	1.40923
24.3874	22.0968	24.4689	24.9165	24.9673	25.2938			+	SS18-SSX1_GFP		5	537970000	0.830219	0.0253367	1.4082	0.788284	FASN	0.830219	1.4082
25.771	24.8447	25.4174	27.1935	26.5889	26.4736			+	SS18-SSX1_GFP		6	2704400000	1.79923	0.00387302	1.40764	1.04251	RAP1A	1.79923	1.40764
27.2333	27.3325	27.2357	28.5799	28.709	28.7251			+	SS18-SSX1_GFP		11	7817400000	4.81153	0.000757709	1.40417	1.32922	YWHAE	4.81153	1.40417
26.4599	26.2871	26.3078	27.7681	27.9378	27.5536			+	SS18-SSX1_GFP		13	3689800000	3.46003	0.000969697	1.40157	1.2472	TPX2	3.46003	1.40157
23.3374	22.389	23.294	24.2701	24.343	24.6054			+	SS18-SSX1_GFP		5	376440000	1.89774	0.00359935	1.39937	1.05573	ASCC3	1.89774	1.39937
24.7837	23.1069	24.9032	25.2921	25.4935	26.2035			+	SS18-SSX1_GFP		4	727240000	1.02195	0.0172537	1.39846	0.851471	UPF3B	1.02195	1.39846
25.5887	25.9554	25.5613	27.391	27.0576	26.8517			+	SS18-SSX1_GFP		12	2764200000	2.64069	0.00126545	1.39834	1.1633	PRPF3	2.64069	1.39834
25.9873	26.6856	26.8758	27.6276	27.9106	28.2049			+	SS18-SSX1_GFP		22	4288000000	1.93386	0.00362866	1.3981	1.06127	MYO1B	1.93386	1.3981
28.6659	28.6771	28.711	30.0621	29.9761	30.2072			+	SS18-SSX1_GFP		20	22577000000	4.45968	0.000742981	1.39715	1.30723	UQCRC2	4.45968	1.39715
28.5545	28.5236	28.2564	29.8287	29.6443	30.0401			+	SS18-SSX1_GFP		7	19683000000	3.1437	0.000921305	1.39288	1.21287	RPLP2	3.1437	1.39288
23.0587	22.4333	22.1992	23.7213	23.8873	24.2589			+	SS18-SSX1_GFP		2	297010000	2.00284	0.00312787	1.39209	1.06937	EIF6	2.00284	1.39209
22.7704	22.3999	22.6133	23.8371	23.8771	24.2436			+	SS18-SSX1_GFP		3	256980000	2.93438	0.00131321	1.39141	1.19116	FARSA	2.93438	1.39141
28.6274	28.5848	28.6169	29.931	29.8646	30.206			+	SS18-SSX1_GFP		13	20514000000	3.72229	0.000707819	1.39083	1.25837	RPSA	3.72229	1.39083
27.2112	27.316	27.1469	28.3557	28.4375	29.0454			+	SS18-SSX1_GFP		8	8011300000	2.469	0.00142958	1.38817	1.13497	RPL12	2.469	1.38817
25.253	25.6645	25.5806	26.5297	26.9272	27.2044			+	SS18-SSX1_GFP		16	2024600000	2.40176	0.00178087	1.3877	1.12582	PBRM1	2.40176	1.3877
23.0673	23.2836	22.3366	24.2291	24.2549	24.3655			+	SS18-SSX1_GFP		2	340530000	2.06031	0.0027438	1.38736	1.07584	WDR75	2.06031	1.38736
24.1229	23.0111	23.1017	24.7697	25.273	24.341			+	SS18-SSX1_GFP		3	655720000	1.4388	0.00861357	1.38265	0.955675	DAD1	1.4388	1.38265
25.7374	25.3662	25.665	26.9467	26.7393	27.2261			+	SS18-SSX1_GFP		13	2161600000	2.79942	0.00127941	1.38119	1.16941	NUP160	2.79942	1.38119
24.7879	24.1416	23.2253	25.8636	25.5077	24.9234			+	SS18-SSX1_GFP		5	701310000	1.22383	0.0120679	1.37996	0.902102	ZNF512B	1.22383	1.37996
25.1055	24.867	24.7997	26.5564	25.9778	26.3663			+	SS18-SSX1_GFP		7	1372800000	2.68145	0.0014657	1.3761	1.1526	ACAD9	2.68145	1.3761
22.7696	23.3571	23.3517	24.2655	24.3738	24.9453			+	SS18-SSX1_GFP		4	364350000	2.05225	0.00328222	1.36873	1.06335	PI4KA	2.05225	1.36873
24.6099	24.3466	24.998	26.1055	25.812	26.1277			+	SS18-SSX1_GFP		7	1193200000	2.50099	0.00195156	1.3636	1.12248	MARS	2.50099	1.3636
25.8255	25.8704	26.0624	27.0576	27.1098	27.6757			+	SS18-SSX1_GFP		8	2427400000	2.52879	0.0017747	1.36159	1.12452	THOC6	2.52879	1.36159
22.2022	22.8317	23.5417	23.8918	23.8502	24.9126			+	SS18-SSX1_GFP		4	254470000	1.22827	0.012162	1.3597	0.894544	INTS10	1.22827	1.3597
22.7865	23.5141	24.1078	24.6603	24.6428	25.1742			+	SS18-SSX1_GFP		2	620950000	1.49507	0.00876583	1.3563	0.955179	LLPH	1.49507	1.3563
22.2805	22.1132	23.4281	24.0759	24.0506	23.7526			+	SS18-SSX1_GFP		1	388930000	1.47203	0.00884088	1.35241	0.948341	TIMM9	1.47203	1.35241
30.5983	30.6251	30.7227	31.9285	31.8198	32.236			+	SS18-SSX1_GFP		151	75151000000	3.30564	0.00131073	1.34605	1.19094	PRKDC	3.30564	1.34605
24.7555	25.7028	24.7685	26.6792	26.3357	26.2469			+	SS18-SSX1_GFP		3	1721200000	1.77562	0.00573023	1.34505	1.00363	LSM8	1.77562	1.34505
25.6406	22.8146	23.6146	24.8813	25.2252	25.9965			+	SS18-SSX1_GFP		10	882890000	0.675929	0.046775	1.34441	0.70635	TUBB8	0.675929	1.34441
27.3097	27.496	27.5035	28.5031	28.5323	29.2905			+	SS18-SSX1_GFP		21	6611600000	2.13918	0.00361688	1.33894	1.0581	DSG2	2.13918	1.33894
24.3422	23.2423	24.4535	25.3004	25.2679	25.4839			+	SS18-SSX1_GFP		3	667330000	1.56844	0.00816	1.33809	0.961042	SAP30BP	1.56844	1.33809
25.3452	25.6089	25.5005	26.889	26.8429	26.7166			+	SS18-SSX1_GFP		4	2287100000	3.87305	0.000930233	1.33132	1.21889	CALM2	3.87305	1.33132
23.7185	23.2935	21.5703	24.0057	23.9608	24.6082			+	SS18-SSX1_GFP		4	355420000	0.900805	0.0256139	1.33083	0.787864	CAMK2D	0.900805	1.33083
25.6283	25.6246	25.5689	26.6577	26.6576	27.4838			+	SS18-SSX1_GFP		13	2199200000	2.06395	0.00386688	1.32577	1.03897	NUP155	2.06395	1.32577
24.5237	22.612	22.1417	24.0833	23.9089	25.2319			+	SS18-SSX1_GFP		4	318360000	0.717448	0.0440426	1.31555	0.715623	MRPL47	0.717448	1.31555
26.7142	26.5408	26.718	28.3971	27.8743	27.6479			+	SS18-SSX1_GFP		6	4982600000	2.33894	0.00293421	1.31538	1.06993	SNRPA	2.33894	1.31538
26.5154	26.2929	26.4744	27.7992	27.5675	27.8418			+	SS18-SSX1_GFP		10	3661400000	3.55483	0.00129368	1.30861	1.17969	SRSF9	3.55483	1.30861
25.219	25.579	25.2147	26.525	26.6188	26.7941			+	SS18-SSX1_GFP		9	1755900000	3.08716	0.00144742	1.3084	1.14349	TPR	3.08716	1.3084
25.1133	25.3842	23.6444	25.7156	25.8938	26.4549			+	SS18-SSX1_GFP		4	1274800000	1.05081	0.0203307	1.30745	0.825112	EEF1B2	1.05081	1.30745
23.1923	24.0299	23.9923	25.1806	24.8803	25.0608			+	SS18-SSX1_GFP		3	560970000	1.97946	0.00545227	1.30237	1.01213	NOL9	1.97946	1.30237
24.4603	23.2051	22.0479	24.5598	24.7927	24.2594			+	SS18-SSX1_GFP		6	532760000	0.845743	0.0316602	1.29952	0.758414	SRP68	0.845743	1.29952
27.7311	27.8528	27.762	29.0325	28.9244	29.2801			+	SS18-SSX1_GFP		37	9407000000	3.50664	0.00127706	1.297	1.16696	IQGAP1	3.50664	1.297
26.372	26.5822	25.9084	27.3504	27.6959	27.7028			+	SS18-SSX1_GFP		8	3409300000	2.30721	0.00358776	1.29551	1.0528	CSTF1	2.30721	1.29551
24.5636	23.8955	23.0765	24.8898	24.7627	25.7651			+	SS18-SSX1_GFP		4	539210000	1.1415	0.0177474	1.29399	0.84403	EED	1.1415	1.29399
22.8013	22.2678	23.8271	23.9921	24.0527	24.7187			+	SS18-SSX1_GFP		2	278110000	1.18066	0.0171117	1.28912	0.851841	LARS	1.18066	1.28912
27.4549	27.5028	27.6402	28.6076	28.8412	29.0067			+	SS18-SSX1_GFP		15	7524300000	3.25285	0.00143972	1.28588	1.13957	USP39	3.25285	1.28588
25.6158	26.1844	26.0547	26.7846	26.8864	28.0398			+	SS18-SSX1_GFP		7	2584400000	1.37106	0.0122563	1.28523	0.893929	EIF3M	1.37106	1.28523
22.1068	22.0754	23.475	23.5023	23.7527	24.2258			+	SS18-SSX1_GFP		3	240380000	1.18	0.0176781	1.2745	0.84527	KCTD12	1.18	1.2745
23.0017	24.032	22.3508	24.0518	24.4854	24.6651			+	SS18-SSX1_GFP		3	319990000	1.14615	0.0184752	1.27262	0.836059	SRP54	1.14615	1.27262
22.7283	26.0538	26.3057	26.189	26.2074	26.4935						7	1825400000	0.475127	0.114327	1.26735	0.587561	SEC61A1	0.475127	1.26735
23.6694	23.9068	24.2394	25.1541	25.2728	25.1891			+	SS18-SSX1_GFP		4	596510000	2.77085	0.00276206	1.26681	1.08365	INTS3	2.77085	1.26681
23.554	22.1553	23.2544	24.0987	24.1199	24.5349			+	SS18-SSX1_GFP		3	302330000	1.3195	0.0141434	1.26327	0.872264	EXOSC3	1.3195	1.26327
26.5952	27.2124	27.1003	27.9944	27.9131	28.7811			+	SS18-SSX1_GFP		26	4852900000	1.70203	0.00912791	1.26024	0.943567	MYO6	1.70203	1.26024
22.9722	22.7265	23.8053	24.3999	24.1365	24.7482			+	SS18-SSX1_GFP		5	386060000	1.56141	0.0108391	1.26018	0.9189	STAG2	1.56141	1.26018
23.9734	22.3995	23.9312	24.8162	24.6751	24.5879			+	SS18-SSX1_GFP		4	461160000	1.13373	0.0201662	1.25837	0.826792	GEMIN4	1.13373	1.25837
21.7104	24.5388	24.7181	24.9513	25.0361	24.7521						5	527390000	0.572182	0.0827497	1.25743	0.635802	RALY	0.572182	1.25743
24.6245	24.5097	24.6187	25.6975	26.1325	25.6898			+	SS18-SSX1_GFP		8	1268900000	2.94233	0.00225503	1.25561	1.0909	SNTB2	2.94233	1.25561
23.419	23.8851	23.2817	24.4322	24.3307	25.5666			+	SS18-SSX1_GFP		5	401460000	1.33835	0.0144926	1.24792	0.868917	HEATR1	1.33835	1.24792
27.5979	27.6429	27.6041	28.9259	29.0163	28.6397			+	SS18-SSX1_GFP		12	10232000000	3.39404	0.00194148	1.24569	1.11783	RPL10	3.39404	1.24569
25.6745	26.1947	25.7501	27.1097	26.8839	27.3445			+	SS18-SSX1_GFP		10	2802300000	2.38637	0.0048252	1.23959	1.02462	PRC1	2.38637	1.23959
24.8396	24.7302	24.9405	25.9823	26.0147	26.2214			+	SS18-SSX1_GFP		4	1039200000	3.67095	0.00163351	1.23602	1.12734	ARPC4	3.67095	1.23602
23.7273	24.3788	23.5136	24.9953	24.9455	25.387			+	SS18-SSX1_GFP	+	6	577610000	1.85844	0.00874009	1.23599	0.954225	ESYT2	1.85844	1.23599
26.6795	26.5291	26.5555	27.6052	27.4947	28.3582			+	SS18-SSX1_GFP		6	3953100000	1.95691	0.00788674	1.23131	0.965557	SNRPF	1.95691	1.23131
26.438	26.4971	26.5997	27.6381	27.7189	27.8604			+	SS18-SSX1_GFP		6	3865900000	3.9709	0.00143463	1.22751	1.13625	CAPZA1	3.9709	1.22751
22.0439	22.2668	22.822	23.5785	23.5835	23.6384			+	SS18-SSX1_GFP		2	171400000	2.20582	0.00652824	1.22257	0.992242	SLC5A6	2.20582	1.22257
23.5595	24.1326	23.9739	25.0931	24.9064	25.3243			+	SS18-SSX1_GFP		5	673150000	2.36418	0.00575701	1.2193	1.00828	LRCH2	2.36418	1.2193
28.0719	28.4174	28.2188	29.137	29.1778	30.0441			+	SS18-SSX1_GFP		28	11706000000	1.75478	0.0105706	1.21693	0.927339	CPSF2	1.75478	1.21693
24.6532	24.6328	24.5941	25.7656	25.7943	25.9674			+	SS18-SSX1_GFP		6	1047800000	4.30773	0.00144227	1.21572	1.14112	PRMT5	4.30773	1.21572
28.36	28.3865	28.2131	29.5528	29.4519	29.5843			+	SS18-SSX1_GFP		19	13553000000	4.2548	0.00142456	1.2098	1.13373	HNRNPR	4.2548	1.2098
26.519	26.0761	26.2307	27.2973	27.368	27.7848			+	SS18-SSX1_GFP		10	3243100000	2.42197	0.00573913	1.20809	1.00678	BCAS2	2.42197	1.20809
29.7273	29.6542	29.775	31.022	31.1208	30.6335			+	SS18-SSX1_GFP		29	31252000000	2.85643	0.0037512	1.20657	1.04663	NONO	2.85643	1.20657
25.5935	24.9566	25.0099	26.1501	26.2924	26.7262			+	SS18-SSX1_GFP		8	1407000000	1.96376	0.0088538	1.20289	0.948916	EIF3C	1.96376	1.20289
27.6069	27.71	27.6417	28.6381	28.5997	29.3247			+	SS18-SSX1_GFP		21	7957700000	2.1435	0.00776012	1.20132	0.970787	HSPD1	2.1435	1.20132
30.4507	30.6635	30.6524	31.8992	31.7735	31.6863			+	SS18-SSX1_GFP		11	48911000000	3.68299	0.00226644	1.19744	1.09582	HIST1H4A	3.68299	1.19744
23.8957	23.9888	23.0192	24.7008	24.6633	25.1264			+	SS18-SSX1_GFP		3	430930000	1.59948	0.0126418	1.19559	0.890442	COIL	1.59948	1.19559
26.0786	25.1654	25.5762	26.419	26.7145	27.272			+	SS18-SSX1_GFP		10	1760700000	1.51809	0.0136207	1.19504	0.87633	RACGAP1	1.51809	1.19504
24.5803	24.4093	24.9471	25.4531	25.9978	26.0693			+	SS18-SSX1_GFP		5	1018800000	2.04979	0.00875294	1.1945	0.954808	KIF2A	2.04979	1.1945
25.4514	24.9287	25.6096	26.3034	26.1952	27.074			+	SS18-SSX1_GFP		11	2410900000	1.58975	0.0127779	1.19431	0.888125	AKAP2	1.58975	1.19431
22.7901	22.4891	21.8608	23.7317	23.6934	23.2907			+	SS18-SSX1_GFP		2	229010000	1.74499	0.0111851	1.1919	0.911262	BLM	1.74499	1.1919
23.1648	21.2977	22.5342	23.3956	23.6671	23.5048			+	SS18-SSX1_GFP		2	175390000	1.00811	0.0298735	1.19026	0.76593	TAF5	1.00811	1.19026
26.559	26.1907	25.9697	27.9236	27.5407	26.8119			+	SS18-SSX1_GFP		12	2826500000	1.48964	0.0147634	1.18559	0.866287	CDK11B	1.48964	1.18559
30.8481	30.7106	30.7838	31.7941	31.78	32.324			+	SS18-SSX1_GFP		103	70408000000	2.53016	0.0060743	1.18522	1.00158	PRPF8	2.53016	1.18522
23.2471	22.9571	22.1972	23.8338	23.7265	24.3963			+	SS18-SSX1_GFP		3	240300000	1.46388	0.0162193	1.18507	0.861447	EIF4G2	1.46388	1.18507
28.0917	28.0006	28.017	29.3064	29.2288	29.1226			+	SS18-SSX1_GFP		10	12788000000	4.40245	0.00193482	1.1828	1.11564	RPL7	4.40245	1.1828
28.6187	28.6358	28.9014	29.9435	29.9651	29.7711			+	SS18-SSX1_GFP		16	15252000000	3.35789	0.00361102	1.17462	1.05804	GNAI2	3.35789	1.17462
29.8696	29.9369	29.8928	30.7388	30.8158	31.6585			+	SS18-SSX1_GFP		13	36982000000	1.78058	0.0117787	1.17124	0.904288	NPM1	1.78058	1.17124
26.5714	26.7393	27.1317	27.829	27.8747	28.2473			+	SS18-SSX1_GFP		26	4533800000	2.27534	0.007875	1.16953	0.964655	EIF3A	2.27534	1.16953
22.8624	23.2387	22.9437	24.3469	24.3253	23.8701			+	SS18-SSX1_GFP		5	336050000	2.42205	0.00762651	1.16584	0.977275	PHF8	2.42205	1.16584
23.9222	22.7156	24.0839	24.297	24.5358	25.3572			+	SS18-SSX1_GFP		3	409070000	1.00836	0.0325182	1.15616	0.751726	ABCC1	1.00836	1.15616
24.5584	22.6702	24.5472	24.8174	24.7182	25.7066						3	636330000	0.756895	0.0579193	1.15548	0.678966	NUP214	0.756895	1.15548
28.2519	28.494	28.5476	29.3009	29.3591	30.0972			+	SS18-SSX1_GFP		20	12314000000	1.87929	0.0116686	1.15461	0.907749	TUBB	1.87929	1.15461
24.6456	25.1149	24.8821	25.9077	26.0099	26.1805			+	SS18-SSX1_GFP		8	1030100000	2.73489	0.00639755	1.15185	0.995472	HCFC1	2.73489	1.15185
22.9937	24.3482	24.3951	25.1575	25.458	24.5264			+	SS18-SSX1_GFP		8	551070000	0.994429	0.0362407	1.13501	0.739291	GATAD2A	0.994429	1.13501
25.4788	25.3564	25.5904	26.5656	26.4779	26.7872			+	SS18-SSX1_GFP		13	1852500000	3.24031	0.00498587	1.135	1.01869	PABPC4	3.24031	1.135
26.264	26.4368	26.008	27.7322	27.6146	26.7648			+	SS18-SSX1_GFP		7	3551700000	1.58229	0.0171345	1.1343	0.853355	RAC1	1.58229	1.1343
31.0093	31.1845	31.0452	31.972	32.3157	32.3532			+	SS18-SSX1_GFP		6	62333000000	2.98941	0.00606491	1.13402	1.0013	HIST1H2AJ	2.98941	1.13402
26.773	26.5839	26.7423	27.7318	27.5694	28.1972			+	SS18-SSX1_GFP		10	4480000000	2.34338	0.00915452	1.13306	0.946543	PHGDH	2.34338	1.13306
25.4206	25.1654	25.2851	26.4988	26.1184	26.6527			+	SS18-SSX1_GFP		8	2054300000	2.53214	0.0078633	1.13293	0.964153	TMEM43	2.53214	1.13293
28.0785	28.3422	28.3149	29.1553	29.1297	29.8483			+	SS18-SSX1_GFP		12	13185000000	1.97675	0.0116188	1.13257	0.906183	RPLP0	1.97675	1.13257
26.9324	26.846	26.6701	27.7701	27.5662	28.4986			+	SS18-SSX1_GFP		11	4129700000	1.73672	0.0139946	1.1288	0.872773	DKC1	1.73672	1.1288
26.6155	26.3075	26.7457	27.5696	27.7458	27.7349			+	SS18-SSX1_GFP		13	3349100000	2.86665	0.00686322	1.12713	0.987089	UHRF1	2.86665	1.12713
24.2024	23.8455	23.8782	25.2959	25.0339	24.9584			+	SS18-SSX1_GFP		7	597390000	2.73215	0.00777177	1.12071	0.971913	USP7	2.73215	1.12071
24.0147	23.9777	22.8891	24.4132	24.3739	25.4402			+	SS18-SSX1_GFP		3	397530000	1.03071	0.0361735	1.11523	0.739504	NOSIP	1.03071	1.11523
26.4259	26.6014	27.0359	27.8325	27.6818	27.8924			+	SS18-SSX1_GFP		15	3764800000	2.35975	0.010153	1.11448	0.935105	CDC73	2.35975	1.11448
28.9533	28.9384	28.8131	30.0991	30.1394	29.8045			+	SS18-SSX1_GFP		17	24500000000	3.20145	0.00642704	1.11272	0.998354	RPL4	3.20145	1.11272
24.8698	25.1581	24.8787	25.7993	25.9644	26.4678			+	SS18-SSX1_GFP		7	1102300000	2.12162	0.0116519	1.10831	0.906797	RBM42	2.12162	1.10831
23.0674	24.5984	24.3533	24.7723	24.7852	25.7677			+	SS18-SSX1_GFP		4	565200000	0.888572	0.0494222	1.10204	0.698374	KIF22	0.888572	1.10204
27.3463	27.3168	27.2981	28.1326	28.2551	28.8795			+	SS18-SSX1_GFP		18	5599300000	2.04922	0.0120559	1.10201	0.894718	SYNCRIP	2.04922	1.10201
28.1301	27.9209	28.1816	28.8459	28.9289	29.7616			+	SS18-SSX1_GFP		22	9235400000	1.65592	0.0176548	1.10127	0.845144	CDC5L	1.65592	1.10127
25.7512	26.0306	26.2032	26.9275	26.9086	27.4386			+	SS18-SSX1_GFP		16	2423300000	2.13536	0.0121408	1.09657	0.900371	PPP1CC	2.13536	1.09657
23.3309	22.8675	22.8961	23.9927	23.9995	24.3668			+	SS18-SSX1_GFP		3	243850000	2.30192	0.0111691	1.08818	0.911149	IPO4	2.30192	1.08818
22.6092	22.8852	22.8063	23.4928	23.8345	24.2291			+	SS18-SSX1_GFP		4	283630000	2.05024	0.0133022	1.08522	0.883725	CYB5R1	2.05024	1.08522
23.7349	23.1124	22.0176	24.3196	23.7998	23.9993			+	SS18-SSX1_GFP		4	232190000	0.969068	0.0456198	1.08459	0.711545	IQGAP2	0.969068	1.08459
23.0491	23.9986	24.5959	25.3826	25.1895	24.3169						9	714640000	0.906263	0.0510163	1.08176	0.694758	DDX24	0.906263	1.08176
24.4786	24.3572	24.3506	25.9088	25.5846	24.9245			+	SS18-SSX1_GFP		5	1007500000	1.67414	0.0191458	1.07714	0.833323	FMR1	1.67414	1.07714
25.812	26.0061	25.8779	27.0908	27.0498	26.7864			+	SS18-SSX1_GFP		11	2172600000	3.19822	0.0077485	1.07702	0.969338	CTR9	3.19822	1.07702
26.0347	25.4258	26.1294	26.6165	26.8623	27.3405			+	SS18-SSX1_GFP		14	2261300000	1.60989	0.02048	1.07649	0.824124	NUP133	1.60989	1.07649
26.1144	25.7884	25.796	26.956	26.8088	27.1519			+	SS18-SSX1_GFP		8	2123300000	2.73423	0.0100173	1.07264	0.935706	RFC3	2.73423	1.07264
34.7629	34.7367	34.6525	35.6114	35.7177	36.0341			+	SS18-SSX1_GFP		33	945200000000	2.90983	0.00914119	1.07037	0.94618	ACTG1	2.90983	1.07037
23.081	22.642	22.7563	23.675	23.6885	24.3261			+	SS18-SSX1_GFP		2	181250000	1.88021	0.0171573	1.0701	0.854788	MAU2	1.88021	1.0701
22.9863	23.0756	23.4025	24.2066	24.0095	24.4399			+	SS18-SSX1_GFP		2	366550000	2.4099	0.0118924	1.06387	0.903559	CKMT1A	2.4099	1.06387
24.2218	23.0036	23.9246	24.3727	24.5904	25.3781			+	SS18-SSX1_GFP		3	405840000	1.04714	0.0432229	1.0637	0.72007	RBM12B	1.04714	1.0637
27.9806	28.106	28.1187	29.0341	29.136	29.2091			+	SS18-SSX1_GFP		7	10844000000	4.02118	0.00651829	1.05796	0.991318	SRSF2	4.02118	1.05796
24.2948	23.4971	24.5669	25.2044	24.8209	25.5044			+	SS18-SSX1_GFP		6	789200000	1.31297	0.0295922	1.05697	0.767571	PELP1	1.31297	1.05697
22.4979	24.5732	23.3152	24.0758	24.541	24.9362						3	277750000	0.741863	0.0809341	1.05554	0.638642	ARID2	0.741863	1.05554
23.2466	24.6046	23.6676	24.9477	24.7604	24.9723			+	SS18-SSX1_GFP		6	646470000	1.21706	0.0328396	1.05387	0.749097	EMC2	1.21706	1.05387
27.226	27.2881	27.4589	28.3408	28.3495	28.4406			+	SS18-SSX1_GFP		28	6502700000	3.78937	0.00764955	1.05264	0.977753	TJP1	3.78937	1.05264
25.9096	25.8999	26.24	26.699	26.8527	27.6475			+	SS18-SSX1_GFP		5	2692600000	1.53949	0.0238239	1.0499	0.79872	CAPRIN1	1.53949	1.0499
25.5033	25.5153	25.4563	26.5127	26.1084	27.0023			+	SS18-SSX1_GFP		9	1771700000	1.81085	0.0190091	1.04952	0.833578	ABCF1	1.81085	1.04952
25.7057	25.1674	25.5983	26.2515	26.2914	27.0601			+	SS18-SSX1_GFP		11	1400700000	1.54969	0.0245578	1.04389	0.796663	SYMPK	1.54969	1.04389
23.115	22.7316	24.9512	24.7885	25.1121	24.0231						3	614460000	0.618257	0.110659	1.04197	0.592949	ATP6V1A	0.618257	1.04197
29.619	29.5369	29.519	30.5235	30.5645	30.7043			+	SS18-SSX1_GFP		41	28939000000	4.10697	0.00763801	1.03912	0.977709	IMMT	4.10697	1.03912
23.4806	23.7089	23.8283	24.4955	24.607	25.0308			+	SS18-SSX1_GFP		4	462670000	2.24439	0.0141243	1.03846	0.870938	SMPD4	2.24439	1.03846
23.0648	23.0528	22.7313	23.7367	23.9741	24.2474			+	SS18-SSX1_GFP		3	219780000	2.31456	0.0135837	1.0364	0.875656	ASPH	2.31456	1.0364
27.0494	27.331	27.4312	28.6997	28.4757	27.7419			+	SS18-SSX1_GFP		9	8037900000	1.53556	0.0253683	1.03526	0.789674	COX4I1	1.53556	1.03526
25.3574	22.6942	24.3277	25.0221	25.2253	25.2372						6	711550000	0.594494	0.118464	1.0351	0.582016	SNW1	0.594494	1.0351
30.033	29.8737	29.8354	30.8214	30.7871	31.2385			+	SS18-SSX1_GFP		46	37112000000	2.55949	0.012145	1.03498	0.894359	DHX9	2.55949	1.03498
26.341	26.3937	25.5749	27.016	27.3454	27.0525			+	SS18-SSX1_GFP		7	3026100000	1.65766	0.0233105	1.03474	0.805621	NDUFB9	1.65766	1.03474
29.2711	29.2037	29.3118	30.1445	29.9593	30.7839			+	SS18-SSX1_GFP		13	21877000000	1.83022	0.0202225	1.0337	0.825789	SLC25A3	1.83022	1.0337
27.3116	27.2828	27.3335	28.1437	28.045	28.8346			+	SS18-SSX1_GFP		18	5862400000	1.84478	0.0201401	1.03184	0.826248	KPNB1	1.84478	1.03184
22.4294	22.8973	22.1046	23.2757	23.4615	23.7859			+	SS18-SSX1_GFP		2	170380000	1.70364	0.0227751	1.03057	0.80884	UTP4	1.70364	1.03057
28.7441	28.8391	28.744	30.0304	30.0669	29.3215			+	SS18-SSX1_GFP		39	19224000000	1.86767	0.0200728	1.03052	0.827961	EPB41L2	1.86767	1.03052
25.6561	21.8821	25.5098	25.1413	25.4029	25.5757						9	923020000	0.341421	0.269717	1.02396	0.456968	LMO7	0.341421	1.02396
23.0989	23.5146	22.7068	23.9863	24.1208	24.2821			+	SS18-SSX1_GFP		2	264110000	1.83465	0.0208769	1.02297	0.819428	NCOA5	1.83465	1.02297
22.9559	22.4615	22.3134	23.3733	23.4122	24.0124			+	SS18-SSX1_GFP		3	185090000	1.64399	0.024527	1.02237	0.796387	XPOT	1.64399	1.02237
26.2435	26.1469	26.149	27.1087	26.9422	27.5529			+	SS18-SSX1_GFP		19	2813000000	2.27938	0.016241	1.02148	0.861992	XRN2	2.27938	1.02148
23.8478	23.8707	23.8775	24.5951	24.6234	25.4333			+	SS18-SSX1_GFP		7	451530000	1.68301	0.0238539	1.01864	0.798965	ERLIN1	1.68301	1.01864
24.4749	24.7096	24.9973	25.8171	24.9304	26.4882						14	849040000	1.00383	0.0542764	1.01796	0.689794	KRT8	1.00383	1.01796
27.6656	27.5278	27.6986	28.4055	28.3882	29.1458			+	SS18-SSX1_GFP		2	7359600000	1.78581	0.0226921	1.01584	0.809363	SNRPE	1.78581	1.01584
22.8649	22.41	23.8002	24.2827	23.6839	24.1554			+	SS18-SSX1_GFP		19	226420000	1.06568	0.0489801	1.01564	0.701452	FLNC	1.06568	1.01564
24.3556	24.3404	24.4619	25.3706	24.925	25.8896			+	SS18-SSX1_GFP		7	665260000	1.63786	0.0255821	1.00912	0.787563	PDS5A	1.63786	1.00912
23.7199	22.1528	23.7798	23.1152	23.9326	25.6256						2	359120000	0.480068	0.176566	1.00696	0.526895	TRIM33	0.480068	1.00696
24.7488	22.3749	22.6425	24.3402	24.1929	24.2521						5	417800000	0.598935	0.126857	1.00628	0.574392	CLTA	0.598935	1.00628
25.5352	25.5238	25.7082	26.5926	26.3678	26.8227			+	SS18-SSX1_GFP		11	1932300000	2.652	0.0135157	1.00532	0.878589	TBL3	2.652	1.00532
23.2392	24.1277	23.4335	24.1837	24.221	25.4114						3	359500000	0.970909	0.0590737	1.00527	0.676924	UTP14A	0.970909	1.00527
27.0074	26.9077	26.6806	27.733	27.9317	27.9423			+	SS18-SSX1_GFP		10	4780400000	2.97606	0.0121067	1.00376	0.897599	IK	2.97606	1.00376
24.0434	22.3345	24.0014	24.3436	24.6061	24.4366						4	567190000	0.817087	0.0804251	1.00236	0.63926	MAGT1	0.817087	1.00236
24.5678	24.7487	25.1238	25.5516	25.5738	26.3153			+	SS18-SSX1_GFP		7	963260000	1.53911	0.0291261	1.00012	0.76953	TRIM28	1.53911	1.00012
27.0648	26.7723	26.6371	27.5085	27.3256	28.6198			+	SS18-SSX1_GFP		14	3950100000	1.10248	0.0496896	0.993249	0.697685	FLOT2	1.10248	0.993249
22.6112	23.6368	22.5916	23.4306	23.7254	24.6621						2	200990000	0.914467	0.0686925	0.992793	0.658822	INTS5	0.914467	0.992793
27.359	27.3466	27.6043	28.4019	28.3653	28.5193			+	SS18-SSX1_GFP		25	5306200000	3.3074	0.0116023	0.992219	0.905383	JUP	3.3074	0.992219
28.2921	28.2632	28.4124	29.2963	29.148	29.4968			+	SS18-SSX1_GFP		18	9389800000	3.0615	0.0125042	0.991096	0.89213	PRPF4	3.0615	0.991096
26.4939	26.3218	26.3271	27.0267	27.1532	27.9338			+	SS18-SSX1_GFP		9	2914700000	1.57365	0.0296284	0.990264	0.768099	MAGOHB	1.57365	0.990264
23.3692	23.0176	23.4029	24.2115	24.1427	24.4002			+	SS18-SSX1_GFP		2	238910000	2.61254	0.015855	0.988186	0.862836	DCUN1D5	2.61254	0.988186
26.0807	25.7238	25.8692	26.8789	27.1011	26.6422			+	SS18-SSX1_GFP		5	2322500000	2.36887	0.0177749	0.982815	0.841312	ALYREF	2.36887	0.982815
25.0308	25.0108	24.9143	25.9758	25.7468	26.181			+	SS18-SSX1_GFP		4	1114800000	2.77878	0.0145121	0.982611	0.869209	CDC2	2.77878	0.982611
24.8788	25.0729	22.8462	24.704	25.1824	25.8509						6	575330000	0.552004	0.153702	0.979782	0.548613	DLGAP5	0.552004	0.979782
29.0532	29.0127	29.0152	29.928	29.8235	30.2602			+	SS18-SSX1_GFP		32	17837000000	2.74604	0.0159839	0.97688	0.862724	SF3B3	2.74604	0.97688
24.1589	23.6915	22.9201	24.304	24.3285	25.0517						7	386450000	1.04507	0.0595443	0.97124	0.676079	DHX8	1.04507	0.97124
23.3603	23.0739	23.6496	24.2443	23.8647	24.8802			+	SS18-SSX1_GFP		1	272570000	1.33399	0.0424019	0.968452	0.722898	SGF29	1.33399	0.968452
30.9255	31.0756	30.9889	32.0311	32.0348	31.8239			+	SS18-SSX1_GFP		107	91030000000	3.52461	0.0122222	0.966638	0.893237	FLNA	3.52461	0.966638
26.3386	26.2794	26.4302	27.2385	27.2842	27.4228			+	SS18-SSX1_GFP		4	2626400000	3.77997	0.0120508	0.965783	0.902043	SRSF10	3.77997	0.965783
28.5033	28.4468	28.4395	29.5817	29.5372	29.1609			+	SS18-SSX1_GFP		27	13624000000	2.69088	0.0172079	0.963427	0.848851	DDX23	2.69088	0.963427
24.1085	23.1399	23.808	24.4822	24.1468	25.3159						7	448050000	1.00316	0.0650377	0.962808	0.663886	INA	1.00316	0.962808
22.8293	22.4152	23.5012	24.1424	24.1127	23.3772						4	279250000	1.12156	0.055123	0.962195	0.685591	CSNK2A2	1.12156	0.962195
24.6795	24.6091	24.4828	26.0061	26.2364	24.4076						4	1124700000	0.764014	0.098512	0.959596	0.608129	CDC42	0.764014	0.959596
24.2816	23.165	23.9325	24.4252	24.6471	25.17						5	508150000	1.13093	0.0554583	0.954407	0.683241	FLII	1.13093	0.954407
26.4099	26.2714	25.9813	27.1152	27.2365	27.1683			+	SS18-SSX1_GFP		10	2784200000	2.72008	0.0176776	0.952502	0.842116	SF3A2	2.72008	0.952502
26.4723	26.5098	26.6337	27.1791	27.8037	27.4811			+	SS18-SSX1_GFP		6	3834700000	2.15061	0.023884	0.94934	0.799919	ATP5L	2.15061	0.94934
28.4581	28.6334	28.4484	29.4942	29.261	29.6266			+	SS18-SSX1_GFP		12	12492000000	2.82046	0.017724	0.947302	0.843825	ILF2	2.82046	0.947302
28.05	28.1482	28.0868	28.906	28.9242	29.288			+	SS18-SSX1_GFP		15	9499100000	2.74907	0.0184993	0.944374	0.837447	SMU1	2.74907	0.944374
26.0064	25.3968	25.272	26.2395	26.3307	26.928			+	SS18-SSX1_GFP		8	1498600000	1.40061	0.0440665	0.940996	0.716585	EIF3E	1.40061	0.940996
24.3771	24.8209	25.438	25.5279	25.7576	26.1726						6	1066900000	1.22471	0.0534698	0.940753	0.691297	CRNKL1	1.22471	0.940753
25.1492	24.9702	24.9914	25.9028	25.8055	26.223			+	SS18-SSX1_GFP		9	1134900000	2.61274	0.0202487	0.940155	0.826002	CSE1L	2.61274	0.940155
22.3345	23.9198	24.0706	23.992	24.1784	24.9644						2	323110000	0.67489	0.126514	0.936614	0.574547	MRPS27	0.67489	0.936614
28.5379	28.3054	28.4682	29.3173	29.3943	29.4069			+	SS18-SSX1_GFP		8	11219000000	3.63848	0.0141053	0.935654	0.870875	FUS	3.63848	0.935654
26.7794	26.8755	26.8075	27.6148	27.5402	28.1129			+	SS18-SSX1_GFP		16	4202800000	2.16738	0.02496	0.935132	0.791136	WDR3	2.16738	0.935132
22.9097	23.7143	23.3993	24.7883	24.8344	23.2004						2	859890000	0.729517	0.113774	0.933268	0.588473	TIMM10	0.729517	0.933268
26.2763	25.8091	26.5916	27.2212	27.4659	26.789			+	SS18-SSX1_GFP		11	3863300000	1.4394	0.0441189	0.933049	0.716979	STT3A	1.4394	0.933049
25.8927	25.6572	22.3122	25.8012	25.8526	25.0021						9	1289500000	0.321375	0.317023	0.931267	0.425514	ANAPC7	0.321375	0.931267
24.2962	22.143	22.9613	23.766	23.8531	24.5688						3	242670000	0.616335	0.148849	0.929118	0.554005	CEP170	0.616335	0.929118
22.755	23.6662	23.6902	24.0642	24.0943	24.7345						3	235530000	1.15481	0.0612583	0.92716	0.673048	YEATS2	1.15481	0.92716
25.2961	25.1234	25.3582	26.1222	26.1418	26.2915			+	SS18-SSX1_GFP		8	1358800000	3.33049	0.0172308	0.925948	0.850831	CCAR1	3.33049	0.925948
28.678	27.8961	28.4614	29.007	29.1027	29.699			+	SS18-SSX1_GFP		3	12043000000	1.35796	0.0490679	0.924367	0.701288	SNRPD3	1.35796	0.924367
22.453	23.0738	23.6308	24.0942	23.7582	24.0765						4	321850000	1.2149	0.0570346	0.92373	0.680582	RHOT1	1.2149	0.92373
25.6999	25.6302	25.9041	26.502	26.5212	26.9797			+	SS18-SSX1_GFP		14	2076300000	2.19521	0.0262129	0.922881	0.784478	DOCK7	2.19521	0.922881
27.8963	28.115	27.9549	28.9159	28.8334	28.9844			+	SS18-SSX1_GFP		18	9356100000	3.5207	0.0170307	0.922539	0.855307	PABPC1	3.5207	0.922539
26.4336	26.3872	26.4986	27.0176	27.1557	27.909			+	SS18-SSX1_GFP		14	2662700000	1.52495	0.0432745	0.920986	0.720163	MDC1	1.52495	0.920986
23.6105	22.6778	23.2513	23.9501	24.0118	24.3348			+	SS18-SSX1_GFP		5	270450000	1.44019	0.0464575	0.919034	0.708773	FYN	1.44019	0.919034
28.8428	28.9361	28.7291	29.5444	29.4748	30.2414			+	SS18-SSX1_GFP		17	14748000000	1.65883	0.0379352	0.917535	0.732873	PPP1CA	1.65883	0.917535
23.0032	25.0155	24.8608	25.3393	25.2746	25.014						2	768920000	0.630879	0.148887	0.916126	0.553845	EXOSC1	0.630879	0.916126
23.2633	23.218	23.4922	24.9827	24.7885	22.9428						4	401160000	0.627289	0.151369	0.913537	0.551805	VEZF1	0.627289	0.913537
23.2305	22.648	22.997	23.8911	23.8584	23.8285			+	SS18-SSX1_GFP		3	272830000	2.2133	0.0289951	0.900875	0.76983	WIZ	2.2133	0.900875
23.0342	22.9174	23.7607	24.4368	24.2836	23.6875						4	376420000	1.20975	0.064362	0.898539	0.66606	SMC3	1.20975	0.898539
23.5278	23.3016	22.5727	24.0752	23.9594	24.0488						3	263870000	1.43221	0.0523772	0.893762	0.692694	DNMT1	1.43221	0.893762
25.9434	26.1276	26.3604	26.7086	26.8046	27.5922						18	2456700000	1.36604	0.0553942	0.891385	0.683159	NUP205	1.36604	0.891385
25.2028	25.0196	25.5833	26.2882	25.7556	26.4274			+	SS18-SSX1_GFP		8	1313100000	1.55251	0.0482961	0.888509	0.703165	TCERG1	1.55251	0.888509
23.1858	23.2447	23.8967	24.1463	24.4332	24.4114			+	SS18-SSX1_GFP		3	321120000	1.64802	0.0452482	0.887904	0.712759	MPP6	1.64802	0.887904
29.0706	28.8162	28.842	29.7838	29.7194	29.8812			+	SS18-SSX1_GFP		37	16626000000	3.15795	0.022721	0.885167	0.809465	PRPF6	3.15795	0.885167
24.9235	25.8773	25.8921	26.9938	26.3179	26.0225						14	2488700000	0.957513	0.0947253	0.88043	0.615485	PRKAR2A	0.957513	0.88043
27.3267	27.3363	27.529	28.6765	28.6947	27.4456						9	8307500000	0.979616	0.0937621	0.874934	0.616765	RPL18A	0.979616	0.874934
23.2698	23.6799	22.3009	23.6601	24.2396	23.9652						2	179170000	0.921484	0.10034	0.871433	0.604417	ATRX	0.921484	0.871433
24.59	23.4912	23.3878	24.7959	24.7624	24.5091						4	463900000	1.0292	0.0914912	0.866126	0.62081	SUGP2	1.0292	0.866126
25.4306	25.0662	25.4989	25.9683	25.7746	26.8324						6	1174600000	1.14944	0.082796	0.859915	0.636118	DNAJA3	1.14944	0.859915
22.8521	23.5129	23.1354	24.3004	24.1488	23.6101						5	360680000	1.40125	0.0651121	0.852991	0.664458	WTAP	1.40125	0.852991
28.0979	28.0924	28.2601	28.9202	28.8965	29.17			+	SS18-SSX1_GFP		55	10347000000	2.91513	0.0299099	0.845383	0.766206	AHNAK	2.91513	0.845383
23.7963	24.2588	23.8802	25.2103	25.2607	23.9817						4	650400000	0.885118	0.118591	0.839127	0.582035	LUZP1	0.885118	0.839127
21.7492	22.2773	22.6633	23.099	23.222	22.8785						3	178220000	1.37808	0.071778	0.836573	0.651863	ZC3H18	1.37808	0.836573
27.0763	26.9672	27.0421	27.9334	27.6505	28.0078			+	SS18-SSX1_GFP		22	4841000000	2.74079	0.0327295	0.835349	0.750192	WDR6	2.74079	0.835349
28.4499	28.4522	28.2238	29.1478	29.0194	29.4619			+	SS18-SSX1_GFP		5	12110000000	2.27336	0.0414994	0.834379	0.724469	RPS15A	2.27336	0.834379
25.9695	25.7122	26.1017	26.542	26.444	27.2929						9	1804900000	1.33524	0.077036	0.831867	0.644117	RFC5	1.33524	0.831867
24.3998	23.2235	24.2651	25.1912	24.5403	24.644						2	580630000	0.915174	0.118144	0.829012	0.582585	POLR2L	0.915174	0.829012
28.3678	28.3022	28.164	29.3375	29.0609	28.8906			+	SS18-SSX1_GFP		9	10324000000	2.3314	0.0440948	0.818319	0.715689	SNRPN	2.3314	0.818319
26.0735	26.0827	26.0548	26.9619	27.0773	26.6179			+	SS18-SSX1_GFP		5	2874000000	2.3839	0.0440142	0.815405	0.716381	RPS21	2.3839	0.815405
26.8225	27.1668	26.6491	27.6995	27.6532	27.7281			+	SS18-SSX1_GFP		23	3586600000	2.21472	0.0471482	0.814135	0.705676	SUPT6H	2.21472	0.814135
26.6753	25.9554	27.0204	27.3081	27.4223	27.3604						8	2610600000	1.21136	0.0929669	0.813198	0.618187	CBX3	1.21136	0.813198
25.2802	23.0519	24.9407	25.3942	24.9975	25.3154						9	865840000	0.504372	0.246304	0.811455	0.476297	YWHAZ	0.504372	0.811455
23.8355	23.6984	24.0649	25.2686	25.5263	23.2223						5	659450000	0.474612	0.261582	0.806169	0.464212	IGF2BP1	0.474612	0.806169
25.6219	25.0886	25.1216	25.9596	25.8887	26.3802						11	990820000	1.58811	0.0738824	0.798786	0.648967	HNRNPH2	1.58811	0.798786
31.1285	31.0838	30.8868	31.5638	31.6589	32.2708						22	61570000000	1.57072	0.0756933	0.798155	0.646997	ACTA1	1.57072	0.798155
27.0222	27.0034	27.3371	27.7966	27.4956	28.4544						26	4118400000	1.23147	0.098193	0.794619	0.609803	PDCD11	1.23147	0.794619
24.8918	24.6003	24.7395	25.3055	25.1731	26.1205						3	962480000	1.20437	0.101183	0.789158	0.603355	DHCR7	1.20437	0.789158
23.0341	22.7004	22.8522	23.6904	23.6274	23.633			+	SS18-SSX1_GFP		2	233480000	2.87788	0.0441714	0.788033	0.717359	MRPS6	2.87788	0.788033
27.4253	27.1354	26.9814	28.2658	27.7954	27.8409						4	5002300000	1.77963	0.0700455	0.786667	0.656425	SNRPD1	1.77963	0.786667
29.1197	28.9396	28.9175	29.5586	29.5482	30.2276						66	17822000000	1.54941	0.0821964	0.785899	0.637037	MYH9	1.54941	0.785899
23.4767	23.4493	23.3287	24.1535	24.313	24.1392			+	SS18-SSX1_GFP		4	359470000	3.39533	0.0385516	0.783651	0.731084	GTF3C3	3.39533	0.783651
24.2838	24.6488	22.3743	24.0398	24.2502	25.3665						4	394710000	0.406905	0.309805	0.783206	0.431134	INTS1	0.406905	0.783206
25.8666	22.2441	25.6024	25.4441	25.3841	25.2005						10	1143800000	0.263665	0.431434	0.77186	0.355981	TPM1	0.263665	0.77186
26.5491	26.5664	26.3237	26.8472	27.1046	27.7461						12	2943400000	1.26861	0.113802	0.75292	0.58893	PRPF31	1.26861	0.75292
25.863	26.1381	24.2154	25.9666	25.9567	26.5515						6	1409900000	0.523946	0.264797	0.75278	0.461345	MOXD1	0.523946	0.75278
27.885	28.1242	27.3108	28.4884	28.6046	28.485						5	8378500000	1.43176	0.100323	0.752681	0.604789	RPL14	1.43176	0.752681
26.8207	26.6991	27.1317	27.7823	27.5543	27.5637						15	3666800000	2.13697	0.0713651	0.749576	0.652486	SART1	2.13697	0.749576
24.6663	24.7442	24.4447	25.7055	25.4901	24.9013						3	847310000	1.36091	0.109777	0.747272	0.594699	EIF3K	1.36091	0.747272
25.887	25.9216	25.5232	26.6706	26.4957	26.3996						10	1738900000	2.11347	0.0756749	0.744709	0.647509	CSTF2	2.11347	0.744709
29.0297	28.5868	28.9764	29.6955	29.5283	29.5844						17	18929000000	2.1223	0.0776198	0.738433	0.643238	RPL7A	2.1223	0.738433
24.0572	22.7102	22.7859	23.7907	24.0419	23.9326						3	281570000	0.766216	0.197252	0.737295	0.510978	RAB14	0.766216	0.737295
25.383	23.5905	24.8393	25.6134	25.7338	24.668						5	918350000	0.511815	0.278079	0.734107	0.450756	SLIRP	0.511815	0.734107
27.5165	27.6824	27.6695	28.2992	28.2511	28.5125						28	5898200000	2.79103	0.0641743	0.731457	0.667146	LRPPRC	2.79103	0.731457
26.5578	26.24	26.1706	27.4326	27.5054	26.2093						8	3604500000	0.764859	0.204357	0.726308	0.505431	COX6C	0.764859	0.726308
28.1823	28.0611	28.0788	28.7538	28.7305	29.0068						20	7477500000	2.77527	0.068333	0.722976	0.65953	ACIN1	2.77527	0.722976
22.7325	22.857	22.9758	23.5496	23.4664	23.7161						2	192000000	2.68402	0.0704835	0.722238	0.655619	MRPL41	2.68402	0.722238
29.3717	29.4482	29.4336	30.2842	30.2734	29.8597						74	24047000000	2.1531	0.0843733	0.72126	0.631749	NUMA1	2.1531	0.72126
28.1874	28.3975	28.3161	28.8161	28.843	29.3989						20	8624600000	1.64414	0.104321	0.719008	0.599403	RUVBL1	1.64414	0.719008
31.0909	31.205	31.1293	32.2522	32.2936	31.0343						33	72706000000	0.801259	0.201203	0.718377	0.507901	SFPQ	0.801259	0.718377
28.1258	28.5256	28.0991	29.0824	29.0791	28.7431						16	9718200000	1.80448	0.0982212	0.718072	0.609557	SRSF1	1.80448	0.718072
29.0065	29.0293	28.9325	29.6334	29.617	29.8695						18	17372000000	2.93449	0.0679041	0.717209	0.660019	RACK1	2.93449	0.717209
25.7501	26.0099	25.8034	26.2221	26.3603	27.115						8	1914500000	1.15926	0.151106	0.711349	0.552052	SRSF5	1.15926	0.711349
28.231	28.3179	28.3646	29.1627	29.0442	28.7795						14	12250000000	2.34761	0.0935921	0.690991	0.617038	RPS19	2.34761	0.690991
25.5834	25.316	25.6205	25.8749	25.9526	26.7475						8	1211800000	1.09236	0.17382	0.685069	0.529066	RAD50	1.09236	0.685069
24.4247	22.7641	22.351	23.84	23.7961	23.9422						5	291540000	0.462218	0.332805	0.679503	0.415555	TPM4	0.462218	0.679503
27.2153	27.1373	27.1706	27.5651	27.6639	28.3285						16	4324200000	1.31865	0.155195	0.678078	0.546495	HSPA9	1.31865	0.678078
27.1448	27.2175	27.316	28.0008	27.7632	27.9476						25	4933900000	2.82644	0.0891752	0.677771	0.623284	TJP2	2.82644	0.677771
27.7779	27.7607	27.9218	28.2274	28.3516	28.9103						13	6478500000	1.45316	0.146083	0.676286	0.55609	BRIX1	1.45316	0.676286
27.9964	28.382	28.2283	28.8639	28.9298	28.836						32	9489900000	2.36801	0.100449	0.674323	0.604524	GTF2I	2.36801	0.674323
26.3197	27.1269	26.9784	27.3089	27.2321	27.9005						4	3245200000	0.966382	0.202276	0.672128	0.506978	NDUFA4	0.966382	0.672128
28.9575	29.065	29.0341	29.3068	29.428	30.3331						15	15347000000	0.96496	0.203376	0.670392	0.505815	PTBP1	0.96496	0.670392
24.7938	23.235	25.5305	25.5153	25.2967	24.7471						7	1059400000	0.394174	0.373342	0.666595	0.388865	NKRF	0.394174	0.666595
22.739	23.243	25.1169	24.5492	24.4906	24.049						5	470370000	0.37572	0.385871	0.66328	0.3811	G3BP2	0.37572	0.66328
28.9294	29.1203	28.8597	29.4284	29.4313	30.0385						36	15340000000	1.41999	0.156967	0.662925	0.54457	ADAR	1.41999	0.662925
27.5737	27.6362	27.7362	28.3943	28.3377	28.201						10	7296700000	3.0557	0.0937734	0.662294	0.616438	RPL28	3.0557	0.662294
26.2865	26.4135	26.1815	26.9807	26.938	26.9298						25	3078300000	3.16714	0.0958244	0.655614	0.61336	RANBP2	3.16714	0.655614
23.7505	23.9809	21.7255	24.0069	23.9555	23.426						11	330120000	0.363066	0.406117	0.643852	0.369998	GNAI1	0.363066	0.643852
26.4341	26.5035	25.8665	26.7817	26.6585	27.2938						11	2618800000	1.07902	0.207115	0.643267	0.502455	G3BP1	1.07902	0.643267
28.9032	28.7322	28.6856	29.4231	29.419	29.407						10	11891000000	3.1972	0.101199	0.642711	0.60273	RPS7	3.1972	0.642711
27.8174	27.7497	27.9053	28.4635	28.5287	28.4049						13	8539900000	3.43512	0.098859	0.641571	0.606688	RPL5	3.43512	0.641571
22.3993	23.8476	22.1348	23.2159	23.3063	23.7831						3	143660000	0.499557	0.339733	0.641205	0.410857	AURKA	0.499557	0.641205
25.583	25.8942	25.7009	26.0693	26.1695	26.8629						9	1417300000	1.13575	0.202643	0.64119	0.50667	RRP12	1.13575	0.64119
27.6259	27.2896	27.9191	28.5623	28.5477	27.6438						21	7822200000	0.838434	0.251033	0.639766	0.472478	CALD1	0.838434	0.639766
28.8568	28.9805	29.0663	29.4881	29.2514	30.0797						14	16753000000	1.18323	0.199364	0.638528	0.509312	HNRNPD	1.18323	0.638528
26.9363	27.0456	27.2901	27.7036	27.5234	27.9588						14	3800700000	1.75222	0.153996	0.637896	0.548027	KHSRP	1.75222	0.637896
25.5696	25.5074	25.8148	25.8776	26.1396	26.7631						7	1359300000	1.06079	0.221742	0.629494	0.492227	EIF4G1	1.06079	0.629494
24.1932	24.9248	25.0876	25.0464	25.489	25.5413						5	830290000	0.919885	0.249915	0.623696	0.473681	NOP2	0.919885	0.623696
28.8064	28.7602	28.8296	29.5453	29.3594	29.36						13	15587000000	3.17464	0.116739	0.622861	0.584761	RPL10A	3.17464	0.622861
25.5274	25.2514	25.5446	26.1726	25.9972	26.0121						7	1287300000	2.30598	0.143268	0.619488	0.557935	THOC5	2.30598	0.619488
24.176	24.0477	23.8751	24.5414	24.4655	24.9492						3	452480000	1.62936	0.175817	0.61909	0.527491	MRPS34	1.62936	0.61909
26.9461	26.9497	26.7724	27.5769	27.5851	27.3527						12	3960300000	2.51647	0.139267	0.615502	0.561573	NDUFA10	2.51647	0.615502
21.6847	23.6186	26.8187	24.7071	24.6488	24.6056						3	688390000	0.152954	0.638661	0.613156	0.245528	FRG1	0.152954	0.613156
29.2472	29.1858	29.3675	29.8594	29.8497	29.9184						38	17237000000	3.34592	0.124406	0.608999	0.575865	SF3B1	3.34592	0.608999
23.4613	25.0991	24.8413	24.8555	24.9118	25.4511						8	635780000	0.485393	0.368651	0.605554	0.392517	DSP	0.485393	0.605554
26.2329	26.4327	26.3151	27.1898	27.212	26.3885						13	2532600000	1.02213	0.251115	0.603165	0.47232	PLRG1	1.02213	0.603165
24.3627	24.3528	24.1005	24.9097	24.9618	24.7528						6	567000000	2.32127	0.15656	0.602776	0.544853	FXR1	2.32127	0.602776
27.9024	28.1395	28.2172	28.4359	28.5427	29.0729						14	6799000000	1.28204	0.225459	0.597475	0.490318	PRPF40A	1.28204	0.597475
27.3493	27.3297	27.3633	27.7682	27.8902	28.1706						22	4703300000	2.12032	0.170377	0.595592	0.532006	MSH6	2.12032	0.595592
25.3913	25.2382	25.7411	25.6337	25.7018	26.8109						8	1356400000	0.653962	0.325366	0.592	0.419993	SRPK1	0.653962	0.592
29.0585	29.0587	28.8812	29.953	29.7346	29.0779						27	18491000000	1.02599	0.261379	0.588996	0.463946	ATAD3A	1.02599	0.588996
23.6382	22.7477	23.5781	23.9995	23.6499	24.0799						3	321370000	0.865678	0.283565	0.588436	0.447073	PFKL	0.865678	0.588436
28.8193	28.7641	28.9835	29.4364	29.2646	29.6264						24	12726000000	2.04753	0.182129	0.586812	0.522302	MATR3	2.04753	0.586812
25.4714	25.4636	25.5093	25.9707	25.9924	26.2391						5	981650000	2.59236	0.163472	0.585983	0.53897	CCT4	2.59236	0.585983
23.9318	23.9109	24.0716	24.1989	24.196	25.2683						2	407390000	0.741995	0.311937	0.582995	0.428519	VRK2	0.741995	0.582995
28.5304	28.584	28.7076	29.3083	29.1657	29.0542						8	13107000000	2.48783	0.182758	0.568753	0.521631	RPS12	2.48783	0.568753
26.1731	26.1976	26.1532	26.8334	26.6867	26.7096						8	2181400000	3.5605	0.158397	0.568635	0.542939	RBM17	3.5605	0.568635
28.2098	28.0649	28.2863	29.1381	29.1907	27.9342						10	11080000000	0.612934	0.355689	0.567312	0.400804	RPS16	0.612934	0.567312
26.6592	26.5259	25.6713	26.801	27	26.7542						7	2239800000	0.823635	0.311607	0.566264	0.429461	NDUFS8	0.823635	0.566264
25.6336	25.4979	25.645	25.9728	25.8595	26.6382						14	1321200000	1.07249	0.275368	0.564644	0.452632	GNAI3	1.07249	0.564644
26.4836	26.4427	26.3201	26.7849	26.7352	27.4122						16	2278100000	1.18303	0.266761	0.561993	0.459394	BAZ1A	1.18303	0.561993
26.9042	26.9808	27.1473	27.2637	27.2106	28.2304						9	3514800000	0.755621	0.331474	0.557489	0.416309	HNRNPA0	0.755621	0.557489
28.3281	28.3731	28.2262	28.9597	28.9289	28.7032						29	8908100000	2.42257	0.201039	0.554813	0.508167	SMARCA5	2.42257	0.554813
21.9677	23.0883	22.6434	23.3483	23.1465	22.8685						3	148400000	0.715595	0.341456	0.554572	0.409516	NCAPG2	0.715595	0.554572
28.6453	28.9401	28.8539	29.1667	29.1613	29.7544						17	12124000000	1.19521	0.277919	0.547653	0.450602	PRPF19	1.19521	0.547653
23.657	22.62	23.1755	23.545	23.5423	24.0062						2	190570000	0.745099	0.341458	0.546983	0.409126	MYO5A	0.745099	0.546983
29.2573	29.0222	29.0658	29.5972	29.5582	29.8186						32	14387000000	2.12517	0.226106	0.542861	0.489683	MYBBP1A	2.12517	0.542861
31.1701	31.2257	31.2008	31.6541	31.6024	31.964						21	60351000000	2.04574	0.230049	0.541265	0.48585	TUBA1B	2.04574	0.541265
26.1042	26.22	26.1896	26.6218	26.5322	26.9827						3	1928300000	1.72263	0.250168	0.540993	0.473727	GAR1	1.72263	0.540993
26.082	26.2836	25.9527	26.7895	26.7019	26.4308						15	1579900000	1.67956	0.257857	0.534646	0.467076	SLC25A4	1.67956	0.534646
29.2855	29.2689	29.3131	29.7445	29.779	29.9366						32	16231000000	3.03119	0.209425	0.530915	0.50062	CPSF1	3.03119	0.530915
28.3348	28.2763	28.0838	28.9276	28.8193	28.5363						16	7659200000	1.72109	0.260768	0.52949	0.464822	CPSF3	1.72109	0.52949
27.9151	27.8348	27.5835	28.2414	28.1308	28.5406						18	5914000000	1.53706	0.27299	0.526443	0.454626	SF3A1	1.53706	0.526443
29.2447	29.2361	29.3043	29.5977	29.6964	30.0663						31	15719000000	1.65878	0.268279	0.525106	0.458926	DHX15	1.65878	0.525106
24.6618	22.2915	23.0822	24.0571	24.2569	23.2874						3	265760000	0.277113	0.540102	0.521991	0.29712	SUN2	0.277113	0.521991
26.0155	26.3772	26.5378	26.821	26.3874	27.2746						10	2209100000	0.799562	0.359172	0.517516	0.398361	THOC1	0.799562	0.517516
28.0939	27.8715	28.1932	28.3964	28.302	29.0064						8	8059500000	1.00595	0.332583	0.515385	0.415505	MYL12A	1.00595	0.515385
24.814	24.6752	24.916	25.2283	25.0511	25.6641						4	645680000	1.23455	0.311851	0.512737	0.429047	TRA2A	1.23455	0.512737
24.1756	22.9825	23.4702	23.7777	23.8813	24.5074						3	291200000	0.546876	0.419705	0.512693	0.362432	SACM1L	0.546876	0.512693
24.148	23.9925	23.8738	24.6537	24.5466	24.3462						4	494340000	1.88206	0.271108	0.510787	0.456026	TRMT1L	1.88206	0.510787
25.7829	25.6777	25.8038	26.3702	26.29	26.1315						8	1425400000	2.50023	0.252597	0.509093	0.471279	SNAP23	2.50023	0.509093
22.8953	23.462	23.3281	23.5112	23.6575	24.0419						2	211550000	1.02452	0.337839	0.508401	0.412337	KIF2C	1.02452	0.508401
27.096	27.2567	27.2404	27.8437	27.5794	27.6758						16	4446600000	2.25073	0.267028	0.501949	0.459409	RTCB	2.25073	0.501949
28.27	28.3093	28.2914	29.0209	28.8365	28.5186						20	9206100000	1.56832	0.299609	0.501754	0.4374	SF3B2	1.56832	0.501754
25.4827	25.8095	26.1126	26.4624	25.9213	26.523						5	1126200000	0.883624	0.362646	0.500642	0.396093	RNF2	0.883624	0.500642
26.0476	25.6986	25.7213	26.0041	25.9587	27.0042						9	1625800000	0.626035	0.410376	0.499852	0.367723	WDR36	0.626035	0.499852
24.8821	24.8477	25.1739	25.4927	25.1431	25.7534						8	988340000	1.13681	0.339566	0.495174	0.410985	AIFM1	1.13681	0.495174
23.3224	22.9518	23.3082	23.6524	23.8756	23.5065						3	231590000	1.39405	0.331232	0.484044	0.416591	MAP4K4	1.39405	0.484044
28.0276	28.026	28.0637	28.5519	28.4982	28.4911						6	9487400000	4.50182	0.261549	0.474637	0.464054	RPL27	4.50182	0.474637
28.3512	28.357	28.5675	28.8293	28.6778	29.1869						14	8090400000	1.32621	0.347424	0.472799	0.405186	KPNA2	1.32621	0.472799
26.2147	26.2553	26.357	26.4319	26.4106	27.3986						8	1736600000	0.648409	0.433219	0.471406	0.35482	ANXA6	0.648409	0.471406
27.2503	27.2511	27.2145	27.5403	27.523	28.0636						10	3916800000	1.24225	0.358247	0.470361	0.399358	HNRNPDL	1.24225	0.470361
26.3547	26.2796	25.7125	26.6852	26.4532	26.6048						10	1935500000	1.02204	0.381536	0.46553	0.383521	RARS	1.02204	0.46553
28.8512	28.9307	29.0166	29.4435	29.5631	29.1778						16	16062000000	1.69703	0.339202	0.461962	0.411196	RPS2	1.69703	0.461962
26.2451	26.3372	26.1786	26.8016	26.6547	26.6803						10	2051000000	2.68354	0.309965	0.458586	0.430784	NOC2L	2.68354	0.458586
23.8475	23.0942	24.5531	23.9558	24.2847	24.6204						5	378340000	0.419153	0.514923	0.455347	0.311271	MTPAP	0.419153	0.455347
29.4763	29.2879	29.3009	29.7682	29.7403	29.9221						19	21795000000	2.26948	0.325219	0.455161	0.420292	RPS3	2.26948	0.455161
23.9866	23.6726	23.4354	24.6644	24.7308	23.062						4	353600000	0.328833	0.553855	0.454215	0.289602	ZNF24	0.328833	0.454215
28.123	28.2422	28.365	28.5385	28.5486	29.0048						10	6657300000	1.26116	0.37396	0.453897	0.388311	FIP1L1	1.26116	0.453897
24.8146	24.7313	22.7281	24.1051	24.5633	24.9603						3	425770000	0.246143	0.607668	0.451544	0.261704	RCL1	0.246143	0.451544
26.9416	26.96	26.7867	27.2778	27.4428	27.2826						11	4125900000	2.32346	0.345454	0.438301	0.406891	ERLIN2	2.32346	0.438301
28.5125	28.4616	28.3325	28.7809	28.5275	29.3119						9	10409000000	0.858038	0.433657	0.437885	0.353923	RPL9	0.858038	0.437885
25.2797	25.6111	25.4681	26.1021	25.563	25.9983						4	1224300000	1.07003	0.41576	0.434823	0.365091	CGGBP1	1.07003	0.434823
23.0321	23.3311	23.65	23.7149	23.6193	23.9595						3	223590000	0.974905	0.433276	0.426866	0.354198	DDB1	0.974905	0.426866
23.3738	23.404	23.452	23.7866	23.8067	23.9137						2	190850000	3.13632	0.345305	0.425679	0.40713	CPVL	3.13632	0.425679
23.2748	22.6747	22.2379	22.6806	22.8209	23.9606						2	130710000	0.349533	0.567913	0.424884	0.282392	INTS6	0.349533	0.424884
26.4093	26.0064	26.4936	26.8422	26.6995	26.6386						10	2563800000	1.2286	0.415633	0.423666	0.364607	0	1.2286	0.423666
25.639	25.0801	24.5421	25.4563	25.4388	25.6346						12	1132200000	0.584461	0.500469	0.422834	0.319661	NUP98	0.584461	0.422834
24.788	24.7419	24.7711	24.9998	25.0264	25.5428						4	904980000	1.12139	0.426201	0.422665	0.359027	LIG3	1.12139	0.422665
25.495	25.5249	25.4755	25.9744	25.9991	25.7761						7	1275300000	2.35781	0.371422	0.418055	0.38996	PRMT1	2.35781	0.418055
23.3363	23.5125	23.8779	23.8079	23.8302	24.3369						2	269270000	0.819679	0.466873	0.416096	0.336892	VWA9	0.819679	0.416096
29.3413	29.3606	29.5508	29.8898	29.835	29.7666						25	21445000000	2.25949	0.381352	0.412906	0.383833	DBN1	2.25949	0.412906
28.9164	29.0783	28.9123	29.6068	29.6503	28.8885						14	17262000000	0.74969	0.480735	0.412894	0.329536	RPL15	0.74969	0.412894
26.9663	26.9864	26.9235	27.2288	27.4693	27.4023						11	3559000000	2.27659	0.387849	0.408055	0.379925	CAPZB	2.27659	0.408055
30.1105	30.0936	30.04	30.446	30.5106	30.5048						32	30362000000	3.78332	0.366544	0.405799	0.394121	DDX17	3.78332	0.405799
23.5728	23.8613	24.0416	24.207	24.1707	24.3063						7	478580000	1.32387	0.435852	0.402795	0.352578	TBL2	1.32387	0.402795
23.6422	22.3849	23.2955	23.9964	23.6437	22.8857						2	241600000	0.331896	0.596777	0.401065	0.267748	CD3EAP	0.331896	0.401065
27.2371	27.3761	27.4269	27.8952	27.8106	27.5092						17	5145000000	1.40212	0.447535	0.391616	0.346508	TPM3	1.40212	0.391616
23.2021	22.2375	23.6827	23.5724	23.3166	23.3977						3	347810000	0.377416	0.590584	0.388114	0.271106	WDR5	0.377416	0.388114
27.1463	26.9842	27.1022	27.644	27.502	27.2483						14	3960000000	1.4357	0.451539	0.387182	0.344036	CHERP	1.4357	0.387182
24.307	24.9761	24.6386	24.9161	25.0064	25.1519						10	672820000	0.872342	0.501669	0.384218	0.318854	SRSF4	0.872342	0.384218
25.855	25.4741	25.3954	26.0095	26.0359	25.7895						3	1447700000	1.07388	0.501689	0.370119	0.318518	EBP	1.07388	0.370119
31.0355	31.0369	31.1051	31.1986	31.3298	31.7303						21	48273000000	1.04804	0.51658	0.36043	0.310296	TUBB4B	1.04804	0.36043
26.2444	26.5952	26.4831	26.7024	26.8097	26.8687						3	2387800000	1.43482	0.505392	0.352675	0.316496	SNRPC	1.43482	0.352675
25.7059	25.1146	25.8667	25.9136	26.0997	25.6894						12	1303000000	0.586484	0.593903	0.338488	0.269155	YES1	0.586484	0.338488
26.6709	27.0994	26.8866	26.699	26.7213	28.2358						7	2676100000	0.252471	0.688752	0.333073	0.218634	HNRNPF	0.252471	0.333073
24.2422	24.0494	24.2046	24.8835	24.2666	24.3445						5	487730000	0.754532	0.578	0.332832	0.276731	ARPC2	0.754532	0.332832
27.1134	27.1729	27.3525	27.388	27.4554	27.7533						12	4189900000	1.12663	0.568386	0.319305	0.281752	LYAR	1.12663	0.319305
21.3881	23.3984	23.7097	22.5369	22.7672	24.1487						2	124890000	0.132666	0.778451	0.318841	0.169174	PPFIA1	0.132666	0.318841
25.1804	25.42	25.2126	25.5022	25.3725	25.8842						8	1523600000	0.857325	0.594335	0.315293	0.269263	PA2G4	0.857325	0.315293
28.2611	28.0999	27.9354	28.6499	28.578	27.9847						13	7500300000	0.591215	0.635737	0.305375	0.248116	SNRNP40	0.591215	0.305375
31.6407	31.6486	31.7052	31.8798	31.8803	32.1419						35	72887000000	1.55428	0.576691	0.302508	0.277626	DDX5	1.55428	0.302508
25.4628	25.5108	25.3053	26.9847	26.8097	23.3876						3	2172500000	0.0914842	0.826366	0.301029	0.138558	NDUFA6	0.0914842	0.301029
26.3975	26.1675	25.8209	26.3382	26.1463	26.795						9	1586600000	0.511623	0.655288	0.297875	0.237322	RFC4	0.511623	0.297875
27.9959	28.3434	28.034	28.5934	28.6658	27.9882						17	8444600000	0.531864	0.659412	0.291377	0.234723	SNRNP70	0.531864	0.291377
23.8699	23.6802	23.9346	24.3559	23.8959	24.0862						4	381710000	0.859968	0.637238	0.284409	0.246505	NUP37	0.859968	0.284409
27.9501	27.9663	27.9523	28.3477	28.1704	28.1927						13	6822300000	2.12973	0.600494	0.280695	0.265814	UBTF	2.12973	0.280695
22.8783	23.3077	24.4483	24.0686	23.7464	23.6563						4	283740000	0.224878	0.74647	0.279002	0.187897	KIF5B	0.224878	0.279002
26.6837	26.4268	26.6645	26.9234	27.0105	26.6773						4	2336800000	1.00996	0.636793	0.278771	0.246804	GNG12	1.00996	0.278771
29.3233	29.391	29.103	29.6969	29.5815	29.3747						15	17279000000	1.01986	0.637035	0.2786	0.246935	GNB2	1.01986	0.2786
22.7948	23.2435	23.6967	23.2314	23.735	23.5687						2	125410000	0.373049	0.715298	0.266701	0.205226	ZMYM2	0.373049	0.266701
27.3569	27.3988	27.4233	27.7551	27.4814	27.7425						12	4029200000	1.36437	0.640812	0.266606	0.244305	POLDIP3	1.36437	0.266606
23.2955	23.661	23.3808	23.5506	23.5533	24.0248						3	209600000	0.615639	0.685579	0.2638	0.221228	PDCD6IP	0.615639	0.2638
28.7609	28.5105	28.6401	28.7868	28.6804	29.2292						6	9822000000	0.646185	0.684978	0.261665	0.2212	RPL38	0.646185	0.261665
25.2974	25.6906	25.6021	25.5493	25.7078	26.1081						10	1148700000	0.560444	0.697334	0.258347	0.21448	RBM28	0.560444	0.258347
28.1006	28.0459	28.1123	28.3674	28.6058	28.0539						19	8247700000	0.727899	0.685723	0.256123	0.220583	SERBP1	0.727899	0.256123
23.7169	24.2673	24.2218	24.465	24.2124	24.2736						4	492140000	0.575633	0.711094	0.248325	0.208313	NUP107	0.575633	0.248325
25.2849	25.1967	25.1419	25.7531	25.5188	25.086						7	1071500000	0.541028	0.717374	0.244782	0.20402	TMOD3	0.541028	0.244782
28.468	28.1464	28.3616	28.5291	28.4861	28.6928						21	7918600000	1.00753	0.688308	0.243981	0.219088	RBM25	1.00753	0.243981
30.2736	30.205	30.2174	30.3131	30.3597	30.7455						72	29427000000	0.80275	0.703986	0.240749	0.211435	MYH10	0.80275	0.240749
28.0713	28.1057	28.043	28.4592	28.4705	28.0103						26	7625100000	0.719155	0.710475	0.240036	0.208249	EPB41	0.719155	0.240036
27.204	27.7478	27.2334	27.5283	27.7025	27.6639						3	4820000000	0.570557	0.726608	0.236469	0.199666	RPS28	0.570557	0.236469
28.109	28.3768	28.1028	28.6214	28.5383	28.133						16	7572400000	0.597058	0.726578	0.234673	0.199581	EIF4A3	0.597058	0.234673
25.5831	25.8233	25.7508	26.2153	25.9777	25.6423						5	1526800000	0.553888	0.740441	0.226031	0.191426	CSNK2B	0.553888	0.226031
29.6846	29.5763	29.7602	29.8777	29.9314	29.8813						42	18965000000	1.78362	0.704014	0.223105	0.211251	HNRNPM	1.78362	0.223105
22.8046	22.7469	23.3919	23.062	23.0011	23.5342						1	158880000	0.33846	0.774094	0.218012	0.172184	RAI14	0.33846	0.218012
27.3029	27.2516	27.2918	27.649	27.4472	27.3913						11	3685500000	1.25725	0.727841	0.213778	0.197978	SNRPA1	1.25725	0.213778
26.0088	26.0322	25.9602	25.9236	25.8621	26.8545						10	1392700000	0.264224	0.791598	0.212957	0.161119	CHD7	0.264224	0.212957
22.2809	23.06	22.5865	23.5292	22.9324	22.0903						2	203670000	0.165084	0.824294	0.208183	0.141146	KIFC1	0.165084	0.208183
23.9271	24.2466	24.1557	25.0236	24.0682	23.8619						4	404200000	0.218933	0.805707	0.208124	0.151888	MBNL1	0.218933	0.208124
26.3092	26.193	26.3595	26.5802	26.5151	26.3881						16	1994100000	1.29645	0.738861	0.2072	0.192761	PPP1CB	1.29645	0.2072
27.1096	27.0389	26.816	27.2106	27.2418	27.1202						14	2853800000	0.993394	0.751285	0.202676	0.184977	GNB1	0.993394	0.202676
23.7979	26.1038	25.3314	25.6089	25.5512	24.6695						5	867200000	0.0957377	0.860319	0.198826	0.114091	CD2BP2	0.0957377	0.198826
30.2695	30.2155	30.3078	30.4831	30.3128	30.5849						55	28675000000	1.1	0.758366	0.196009	0.180855	TOP2B	1.1	0.196009
28.3314	28.3219	28.2376	28.2607	28.3688	28.8357						12	8006300000	0.462289	0.789189	0.191454	0.162395	STOML2	0.462289	0.191454
26.5034	26.3459	26.4108	27.1769	27.1234	25.5314						4	1670500000	0.12913	0.848626	0.190535	0.123585	H2AFV	0.12913	0.190535
28.7478	28.6912	28.8251	28.9664	29.0162	28.8423						23	10621000000	1.3515	0.768161	0.186963	0.175607	NOP56	1.3515	0.186963
24.7123	25.0501	24.977	25.1713	25.0439	25.0738						8	746200000	0.769852	0.784774	0.183224	0.165127	RFC2	0.769852	0.183224
26.4995	26.6414	26.6533	26.5096	26.5138	27.2985						10	1819800000	0.262886	0.827305	0.17588	0.138828	MCM3	0.262886	0.17588
27.4391	27.6264	27.5533	27.3842	27.4477	28.2871						9	4083200000	0.219481	0.842217	0.166767	0.128675	EEF1G	0.219481	0.166767
27.344	27.2208	27.1826	27.6546	27.8919	26.6923						6	4037200000	0.166956	0.854013	0.163809	0.11957	SNRPD2	0.166956	0.163809
28.73	28.5408	28.5805	28.8096	28.7959	28.7192						8	10241000000	1.15754	0.812305	0.157817	0.148309	RPL17	1.15754	0.157817
23.9493	23.1762	22.6659	23.3593	23.428	23.4655						2	174510000	0.153524	0.862022	0.153812	0.111916	MRPS9	0.153524	0.153812
24.5021	24.3562	24.6854	24.4127	24.276	25.3053						4	416970000	0.168344	0.862226	0.150088	0.112299	URB1	0.168344	0.150088
26.1065	26.4308	26.6154	26.39	26.2497	26.9532						13	1799600000	0.218547	0.85802	0.146709	0.116307	RBM27	0.218547	0.146709
30.188	30.1028	30.1038	30.2037	30.262	30.3679						19	25054000000	1.23353	0.827062	0.146376	0.138649	HNRNPU	1.23353	0.146376
27.4734	27.6457	27.7208	27.8119	27.9069	27.5525						8	4352200000	0.485997	0.844389	0.14383	0.127421	CPSF4	0.485997	0.14383
25.2713	23.9213	25.7715	25.1231	25.1119	25.1556						5	875040000	0.0916813	0.890571	0.142172	0.0915647	COX6B1	0.0916813	0.142172
23.5893	23.3653	23.6472	23.7008	23.7967	23.5242						3	403500000	0.524664	0.846407	0.139939	0.125248	DLAT	0.524664	0.139939
23.4509	23.9413	23.0625	24.019	23.8774	22.9722						3	300780000	0.121376	0.88402	0.137979	0.097517	PELO	0.121376	0.137979
23.9108	23.7142	23.8334	24.6438	24.6227	22.5866						4	417110000	0.0670363	0.908699	0.131569	0.0780997	LSM6	0.0670363	0.131569
26.3682	26.4356	26.6067	26.5494	26.6006	26.6449						18	2573900000	0.775314	0.854262	0.128127	0.119061	RRBP1	0.775314	0.128127
29.0458	29.1998	28.7628	28.8668	28.9321	29.566						12	11475000000	0.175203	0.886863	0.118801	0.0945045	HNRNPA3	0.175203	0.118801
25.5111	26.3099	25.8509	25.8256	26.0731	26.102						15	1528300000	0.166977	0.894619	0.109591	0.0878488	SRRT	0.166977	0.109591
28.4893	28.569	28.7025	28.8072	28.6543	28.6126						5	9438100000	0.536905	0.885119	0.104461	0.096204	RPS25	0.536905	0.104461
25.509	25.0912	25.007	24.9624	25.0127	25.9437						4	781650000	0.105561	0.910365	0.103895	0.0766862	TRA2B	0.105561	0.103895
24.0556	24.3363	22.0838	23.688	24.0496	23.0483						3	245020000	0.0461115	0.932752	0.103378	0.0585119	HNRNPLL	0.0461115	0.103378
28.5917	28.4267	28.5474	28.8187	28.6036	28.4197						9	9195000000	0.297819	0.903294	0.0920302	0.0817756	DEK	0.297819	0.0920302
24.999	24.4053	25.0689	24.8152	24.6622	25.2445						5	671430000	0.109678	0.926247	0.0828794	0.0650896	MPRIP	0.109678	0.0828794
23.4961	23.6082	23.5195	23.018	23.6656	24.1807						4	178100000	0.0839807	0.932029	0.0801843	0.0599247	INTS4	0.0839807	0.0801843
26.3637	26.6213	26.648	26.8099	26.9033	26.1489						7	2789400000	0.108617	0.931258	0.0763919	0.0609106	EMD	0.108617	0.0763919
22.1497	24.0119	23.7001	23.6236	23.3533	23.0983						4	305410000	0.0406403	0.950592	0.071139	0.0445877	NEXN	0.0406403	0.071139
26.9546	27.1146	26.5038	26.7291	26.7479	27.2947						13	2643800000	0.0905469	0.940777	0.0662276	0.0525433	EIF4A1	0.0905469	0.0662276
29.6317	29.5894	29.5138	29.8301	29.7055	29.397						14	17100000000	0.189203	0.932468	0.0659097	0.0581589	HNRNPC	0.189203	0.0659097
26.2929	26.1731	26.2744	26.7141	26.7749	25.443						4	1658400000	0.0503335	0.94992	0.0638701	0.0444844	PHF5A	0.0503335	0.0638701
27.2974	27.0559	27.4918	27.41	27.5139	27.0935						21	3992200000	0.116962	0.945842	0.0574144	0.0487157	LMNA	0.116962	0.0574144
29.1948	28.792	29.0326	28.6534	28.6978	29.8373						14	13015000000	0.0477036	0.95283	0.0563596	0.0401218	RPS5	0.0477036	0.0563596
30.0611	29.9975	29.916	30.263	30.0484	29.8216						17	26260000000	0.146361	0.947839	0.0528266	0.0465766	RPS9	0.146361	0.0528266
26.0611	26.0734	25.9706	25.9823	26.038	26.2398						6	1272200000	0.240501	0.947006	0.0516459	0.047615	KRR1	0.240501	0.0516459
26.286	26.3612	26.4409	26.5006	26.3912	26.3488						11	2092700000	0.328659	0.947231	0.0507882	0.0477519	ZFR	0.328659	0.0507882
23.1878	25.468	22.2223	23.8674	24.0003	23.1625						4	404770000	0.0168809	0.972881	0.0506941	0.0253883	SEH1L	0.0168809	0.0506941
26.7812	26.6951	26.7441	26.6026	26.5367	27.231						7	2044100000	0.0791356	0.953141	0.0499789	0.0408761	ZNF512	0.0791356	0.0499789
24.184	24.1838	24.314	23.9288	24.0062	24.8813						3	425110000	0.0498385	0.961839	0.0447922	0.0342316	C12orf43	0.0498385	0.0447922
28.0049	28.4321	28.1292	28.2738	27.8499	28.5568						3	6340500000	0.0544854	0.96709	0.0381495	0.0307307	FAU	0.0544854	0.0381495
25.8336	25.5746	25.0831	24.8539	26.0626	25.6828						5	993990000	0.0288927	0.973653	0.0360381	0.0253916	AKAP17A	0.0288927	0.0360381
28.6182	28.5395	28.4256	28.4114	28.3585	28.9151						12	7718400000	0.0633385	0.968578	0.033886	0.0285718	VDAC2	0.0633385	0.033886
25.4325	25.0911	25.0485	25.287	25.3877	24.9741						5	857670000	0.050474	0.9781	0.0255699	0.0217801	MFAP1	0.050474	0.0255699
26.7715	26.6218	26.7572	26.5075	26.6079	27.0762						16	2224700000	0.0252753	0.991184	0.0137068	0.0116001	NUP93	0.0252753	0.0137068
31.4866	31.3106	31.3167	31.2586	31.2129	31.683						40	57592000000	0.0283853	0.991965	0.0135492	0.0116765	DDX21	0.0283853	0.0135492
23.1857	23.5204	22.9792	23.2791	23.2777	23.1639						2	163580000	0.0242835	0.992651	0.0117753	0.0101317	NKX2-5	0.0242835	0.0117753
22.1929	23.8004	22.5895	22.7602	22.9272	22.9296						2	115280000	0.00770023	0.992621	0.0114059	0.00767195	ABCC4	0.00770023	0.0114059
26.3361	26.717	26.8495	26.889	26.6487	26.3981						11	2321500000	0.0176258	0.993264	0.0111001	0.00917977	RBM15	0.0176258	0.0111001
28.341	28.423	28.3193	28.8966	28.767	27.4508						4	10135000000	0.0073366	0.992883	0.0103404	0.00706832	RPS20	0.0073366	0.0103404
28.0635	28.0183	27.8366	27.8842	27.8958	28.1511						20	5015500000	0.0126141	0.99503	0.00425084	0.00382499	RRP1B	0.0126141	0.00425084
23.0681	21.9159	23.8647	22.9765	23.3951	22.4883						2	177050000	0.0019362	0.996706	0.00369771	0.0022777	ASH2L	0.0019362	0.00369771
27.7314	27.9634	27.8676	27.7556	28.0366	27.7473						23	4732900000	0.021797	0.992275	-0.00761096	-0.00681675	WDR33	0.021797	-0.00761096
28.5818	28.7733	28.456	28.9225	28.8574	27.9978						9	12504000000	0.011742	0.99325	-0.0110976	-0.00845889	RPL13	0.011742	-0.0110976
25.1981	24.7621	24.2641	24.8079	24.3566	25.024						5	513710000	0.0118093	0.993269	-0.0119438	-0.00895445	POP1	0.0118093	-0.0119438
22.2574	22.2203	24.0564	22.4451	22.3343	23.7131						2	115570000	0.00604741	0.993139	-0.0138327	-0.00790354	CUL4B	0.00604741	-0.0138327
26.1515	26.0582	26.3042	26.3781	26.4244	25.6544						6	2007300000	0.0245169	0.986983	-0.019008	-0.0150925	EWSR1	0.0245169	-0.019008
28.8353	28.8211	28.9149	28.1904	28.3269	29.983						18	13286000000	0.013542	0.986571	-0.0236225	-0.0149805	SLC25A6	0.013542	-0.0236225
26.6674	26.6506	27.4522	26.7078	26.7456	27.2381						6	2476800000	0.027988	0.979497	-0.0262362	-0.0199542	SF3B6	0.027988	-0.0262362
25.5357	25.4981	25.4434	25.0028	25.3129	26.0772						8	909500000	0.0295208	0.978718	-0.0281169	-0.0212945	EPRS	0.0295208	-0.0281169
28.8038	28.9633	28.8603	29.3726	29.2285	27.9397						8	14832000000	0.0209964	0.979122	-0.0288391	-0.0197811	RPL18	0.0209964	-0.0288391
27.7662	28.1023	27.951	28.0134	28.0227	27.6802						5	4500300000	0.0817588	0.968035	-0.0344181	-0.0299607	RPS27A	0.0817588	-0.0344181
25.8796	25.8304	25.4416	25.9165	25.5659	25.5594						7	1001600000	0.0704187	0.967678	-0.0366166	-0.0309801	CPSF7	0.0704187	-0.0366166
25.548	25.686	25.1418	25.2062	24.9741	26.0725						7	1011700000	0.0373485	0.96753	-0.0409775	-0.0298666	THOC7	0.0373485	-0.0409775
29.1024	29.3103	29.2146	29.2509	29.1022	29.1392						16	12262000000	0.236356	0.953707	-0.0449905	-0.0418567	HNRNPL	0.236356	-0.0449905
28.9663	28.9142	28.9816	28.74	28.6988	29.2783						22	9522500000	0.0918308	0.952572	-0.0483799	-0.0407308	HSPA1B	0.0918308	-0.0483799
25.1124	24.9948	25.1151	25.2814	25.4568	24.3382						4	1006200000	0.0476535	0.959601	-0.048638	-0.0360385	COA3	0.0476535	-0.048638
28.586	28.5663	28.3876	28.3958	28.4778	28.5189						8	8279700000	0.270567	0.948912	-0.0491441	-0.0458118	RPS17	0.270567	-0.0491441
26.8076	26.6734	26.3753	26.308	26.5221	26.8774						6	1930600000	0.0838431	0.953715	-0.0496114	-0.0410182	SAP18	0.0838431	-0.0496114
28.6065	28.8453	28.8808	28.8153	28.9237	28.3716						16	9361100000	0.144981	0.929835	-0.0740045	-0.0622103	HNRNPA2B1	0.144981	-0.0740045
25.9868	26.0541	26.0636	25.8452	25.5393	26.4917						6	1112000000	0.0966049	0.931845	-0.0760644	-0.0593426	ALKBH5	0.0966049	-0.0760644
29.2508	29.0506	29.0003	29.1334	29.2917	28.6334						11	13960000000	0.141207	0.924068	-0.0810598	-0.066846	SRSF6	0.141207	-0.0810598
26.9737	27.2402	27.2917	27.5371	27.4354	26.2808						4	3351200000	0.0709576	0.932398	-0.0840747	-0.0594261	SF3B5	0.0709576	-0.0840747
23.4121	23.3434	23.2263	23.1848	22.8736	23.66						10	197020000	0.138061	0.917659	-0.087794	-0.0710877	DDX39A	0.138061	-0.087794
27.7069	27.3519	27.3869	27.0834	27.2039	27.8828						15	3772600000	0.122855	0.916133	-0.0918706	-0.0721544	DDX1	0.122855	-0.0918706
27.2065	27.2159	27.3856	27.1148	27.0793	27.3381						18	3593800000	0.38866	0.900894	-0.0919679	-0.0836275	NCL	0.38866	-0.0919679
29.1042	29.0687	28.9939	29.4703	29.4058	28.0147						14	16015000000	0.0674645	0.930488	-0.0920143	-0.0623425	RPL6	0.0674645	-0.0920143
24.6949	24.523	24.7494	24.3475	24.2682	25.0658						4	424930000	0.133562	0.911476	-0.0952543	-0.0754369	HPRT1	0.133562	-0.0952543
25.4184	25.2238	25.2619	25.1021	25.3496	25.1554						10	1007900000	0.443258	0.891375	-0.0989819	-0.0903194	COPB2	0.443258	-0.0989819
26.6174	26.4938	26.7491	26.6039	26.3204	26.6349						14	1605400000	0.332813	0.892878	-0.100349	-0.0892559	TEX10	0.332813	-0.100349
28.2721	28.3877	28.6369	28.2731	28.1819	28.5372						11	5698900000	0.268177	0.894722	-0.101536	-0.0881818	HNRNPA1	0.268177	-0.101536
26.4957	26.4599	26.7265	26.9304	25.766	26.6768						4	2846400000	0.101878	0.912147	-0.102963	-0.0755274	RPL34	0.101878	-0.102963
25.4014	25.1366	25.5059	24.8693	24.9031	25.92						7	659910000	0.117889	0.897515	-0.117184	-0.0860481	RPP30	0.117889	-0.117184
23.5834	24.3251	23.0512	23.6506	23.6829	23.2724						2	264890000	0.108636	0.89907	-0.117894	-0.0846831	PNISR	0.108636	-0.117894
29.4044	29.4568	29.0973	28.7866	28.7793	30.0383						9	10135000000	0.0976963	0.902149	-0.118156	-0.0824414	SRSF3	0.0976963	-0.118156
29.4235	29.3728	29.4718	29.4483	29.5	28.9614						25	14753000000	0.275766	0.878372	-0.119466	-0.101764	ILF3	0.275766	-0.119466
26.8292	25.6102	25.5682	25.898	25.7703	25.9376						10	1100100000	0.116909	0.887482	-0.133886	-0.0945148	BAZ1B	0.116909	-0.133886
26.7253	26.7567	26.6503	26.7524	26.9552	26.0067						11	2231000000	0.183127	0.868133	-0.139399	-0.108053	CHCHD3	0.183127	-0.139399
27.1585	27.365	26.8693	27.6326	26.9794	26.36						4	4303100000	0.130679	0.879296	-0.140277	-0.100589	RPL36	0.130679	-0.140277
28.3503	28.5897	28.6365	28.5717	28.6025	27.95						18	8972500000	0.260835	0.850544	-0.150748	-0.122529	PGAM5	0.260835	-0.150748
25.7704	25.5434	25.3752	25.2501	25.0361	25.9475						5	831840000	0.1956	0.858437	-0.151769	-0.116923	MRPS7	0.1956	-0.151769
25.4152	25.0114	25.1519	25.9661	24.4891	24.654						5	912530000	0.118182	0.872788	-0.156461	-0.105572	LIN7C	0.118182	-0.156461
26.7576	26.7498	26.8135	27.0091	26.9861	25.8447						6	3057500000	0.155906	0.858152	-0.160324	-0.115768	MTX2	0.155906	-0.160324
28.5948	28.6106	28.5544	28.0403	28.3814	28.8509						6	9096500000	0.276927	0.838439	-0.162388	-0.131426	RPL31	0.276927	-0.162388
27.8958	28.0226	27.9188	27.9117	27.7501	27.6801						10	5962500000	0.981069	0.803698	-0.165124	-0.15305	VDAC1	0.981069	-0.165124
22.6092	23.7109	23.7566	22.9676	23.0508	23.5622						3	150140000	0.14691	0.858649	-0.16535	-0.116558	AIMP2	0.14691	-0.16535
26.5455	25.7538	26.1972	25.8065	25.8429	26.3403						6	1188800000	0.231217	0.838175	-0.168935	-0.131307	PARP2	0.231217	-0.168935
27.5156	27.4965	27.3057	27.3403	27.2207	27.2432						20	4448600000	1.05323	0.793654	-0.171216	-0.159066	IRS4	1.05323	-0.171216
28.1448	28.2236	28.029	28.1689	28.2391	27.4745						8	6349000000	0.274999	0.827721	-0.17161	-0.137237	SRSF7	0.274999	-0.17161
23.1171	23.1055	22.9455	22.7753	22.9169	22.9578						2	121510000	1.03675	0.792561	-0.172703	-0.160172	YTHDC2	1.03675	-0.172703
25.5842	25.0737	25.1749	25.5197	25.8073	23.9796						8	847510000	0.107622	0.864285	-0.175389	-0.110414	SLTM	0.107622	-0.175389
26.0834	25.6483	25.661	25.4309	25.4519	25.9074						4	843810000	0.402905	0.784188	-0.200837	-0.165819	GNA11	0.402905	-0.200837
30.2246	30.2955	30.3871	30.0186	30.0883	30.1974						27	22132000000	1.34001	0.746096	-0.200944	-0.187773	HSPA8	1.34001	-0.200944
26.8948	27.0261	26.9127	26.7735	26.9546	26.498						8	1914800000	0.659978	0.764638	-0.202523	-0.177811	SF1	0.659978	-0.202523
23.4966	24.134	23.1694	23.3977	23.2378	23.5512						3	151720000	0.276137	0.795912	-0.204439	-0.157585	ZMYND8	0.276137	-0.204439
26.2205	26.0694	25.9255	25.6458	25.5734	26.3646						7	1071100000	0.324432	0.783997	-0.210514	-0.166217	DDX51	0.324432	-0.210514
28.3592	28.2312	28.0412	28.1275	28.2884	27.5774						13	7468500000	0.38184	0.774668	-0.212745	-0.172371	RPL8	0.38184	-0.212745
24.0081	22.1579	23.4253	23.1296	22.9677	22.824						2	161160000	0.150556	0.820453	-0.223379	-0.143815	OMA1	0.150556	-0.223379
27.8696	27.392	27.7381	27.4388	27.3786	27.4988						16	4184800000	0.7097	0.727436	-0.22783	-0.198701	LIMA1	0.7097	-0.22783
25.9086	25.9015	25.9285	25.4082	25.6032	25.9999						5	883740000	0.626059	0.713064	-0.242448	-0.206466	MCM7	0.626059	-0.242448
27.1493	27.207	26.9502	26.6367	26.6934	27.2361						13	2297500000	0.526288	0.716556	-0.246767	-0.204568	SAFB	0.526288	-0.246767
27.8362	27.7249	27.7715	28.0114	28.17	26.3967						10	7084600000	0.167148	0.793054	-0.251481	-0.160442	RPL13A	0.167148	-0.251481
29.4625	29.4356	29.4616	29.1412	29.0595	29.3814						48	11195000000	1.25445	0.657444	-0.259221	-0.236301	TOP2A	1.25445	-0.259221
25.3417	25.4164	25.3261	25.9788	22.4546	26.8483						3	1630300000	0.0696084	0.860938	-0.267489	-0.114137	RAB5C	0.0696084	-0.267489
30.295	30.236	30.0837	30.0239	30.0389	29.7387						15	23481000000	1.097	0.643386	-0.271072	-0.242855	HNRNPH1	1.097	-0.271072
29.7545	29.9149	29.6064	30.0781	29.8989	28.4628						4	14376000000	0.207763	0.75454	-0.278625	-0.183438	H3F3B	0.207763	-0.278625
29.2468	29.1681	29.2306	29.328	29.3844	28.0646						20	15514000000	0.268399	0.721258	-0.289503	-0.202238	RPL3	0.268399	-0.289503
24.9222	24.9821	24.8553	24.5854	24.462	24.834						6	611810000	1.19289	0.606514	-0.292714	-0.262442	SEC13	1.19289	-0.292714
23.3592	23.418	23.3522	23.0616	23.2311	22.9271						2	192690000	1.54579	0.575856	-0.303189	-0.278055	SEC61B	1.54579	-0.303189
28.3429	28.2205	28.0825	28.2405	27.9783	27.4914						9	8396800000	0.602109	0.62517	-0.311909	-0.253175	RPL11	0.602109	-0.311909
25.8054	25.8671	25.9052	25.9809	25.7819	24.8751						4	1242000000	0.386207	0.661325	-0.313252	-0.233501	RBM8A	0.386207	-0.313252
26.9182	26.936	27.158	26.6786	26.5793	26.7862						6	2366300000	1.52693	0.545763	-0.322696	-0.294012	SNU13	1.52693	-0.322696
28.6639	28.6088	28.7693	28.0695	28.0519	28.9328						16	5529400000	0.486476	0.623181	-0.329252	-0.254339	DDX52	0.486476	-0.329252
31.1635	31.2324	31.1307	31.1214	31.142	30.2715						22	48644000000	0.500866	0.618789	-0.330531	-0.256553	HNRNPK	0.500866	-0.330531
25.1634	25.1014	25.4638	24.9294	24.8708	24.9295						6	586990000	1.36847	0.538988	-0.332895	-0.298933	AAAS	1.36847	-0.332895
25.087	25.118	24.9624	24.6745	24.5284	24.9269						5	484600000	1.28951	0.522077	-0.345856	-0.307225	FIBP	1.28951	-0.345856
25.1868	25.3658	25.5258	24.9782	24.7757	25.2722						10	947020000	0.941437	0.538884	-0.350714	-0.298672	NEFM	0.941437	-0.350714
23.3876	25.1873	24.7044	24.3721	24.3293	23.5105						5	450880000	0.229928	0.685742	-0.355801	-0.221479	CTCF	0.229928	-0.355801
27.7904	27.7029	27.6822	27.0608	27.3266	27.7188						8	2832000000	0.85394	0.538696	-0.356429	-0.298527	MPG	0.85394	-0.356429
26.0291	26.1141	26.2398	25.7849	25.8665	25.6291						8	1047800000	1.77911	0.468121	-0.367497	-0.336313	IWS1	1.77911	-0.367497
27.128	27.0884	27.1755	26.5663	26.4441	27.2666						6	2818600000	0.652894	0.542949	-0.37165	-0.295552	PRDX6	0.652894	-0.37165
26.0488	25.9502	25.8572	25.6369	25.0756	26.0085						6	721450000	0.613912	0.541636	-0.378447	-0.296415	CACTIN	0.613912	-0.378447
26.77	26.7125	26.5901	26.2993	26.2809	26.343						6	1578500000	2.61715	0.419323	-0.383138	-0.362763	RCC1	2.61715	-0.383138
29.2663	29.4495	29.2733	28.9324	29.0384	28.8614						21	10005000000	2.08982	0.428869	-0.385665	-0.357445	U2SURP	2.08982	-0.385665
26.377	25.9769	26.3699	26.0793	25.7568	25.7292						8	1398200000	1.04563	0.481383	-0.386193	-0.329094	EIF3B	1.04563	-0.386193
24.4257	24.3019	24.4897	24.4349	24.4603	23.163						4	457470000	0.375219	0.593031	-0.386351	-0.269839	YTHDC1	0.375219	-0.386351
29.6725	29.7094	29.7757	29.3363	29.2898	29.372						7	14524000000	3.25902	0.401283	-0.386541	-0.372228	RPS10	3.25902	-0.386541
24.3649	23.874	22.3759	23.0172	23.1946	23.213						2	160670000	0.263109	0.636372	-0.396641	-0.247678	WDR43	0.263109	-0.396641
27.1415	27.2312	26.9492	26.7492	26.7375	26.6421						11	2236100000	1.94095	0.41567	-0.397701	-0.364913	CMAS	1.94095	-0.397701
26.4394	26.2833	26.6259	26.2008	26.0852	25.8683						8	1414200000	1.33992	0.441647	-0.398047	-0.349485	FUBP3	1.33992	-0.398047
27.8623	27.4778	27.512	26.9898	27.1765	27.4698						6	2689000000	1.02283	0.45593	-0.405354	-0.341768	CPSF6	1.02283	-0.405354
29.8301	29.8203	29.8318	29.2402	29.43	29.5943						12	13838000000	1.77996	0.409908	-0.405896	-0.36821	SRRM1	1.77996	-0.405896
24.4929	22.1853	23.0956	22.8969	22.8631	22.7444						4	120060000	0.249142	0.625215	-0.423152	-0.252978	FXR2	0.249142	-0.423152
25.0172	25.3617	24.3694	24.1334	24.0929	25.2496						4	503220000	0.371775	0.558811	-0.42411	-0.286998	HNRNPUL2-BSCL2	0.371775	-0.42411
29.4077	29.5793	29.3929	29.426	29.2419	28.4365						8	13690000000	0.616673	0.489859	-0.425147	-0.32462	KHDRBS1	0.616673	-0.425147
28.0734	28.1141	28.439	27.8892	27.8633	27.5978						6	6229800000	1.33999	0.405663	-0.425412	-0.370407	MYL6	1.33999	-0.425412
26.0023	26.2265	26.1285	25.4102	25.5695	26.0525						5	973000000	1.01756	0.411666	-0.44167	-0.366917	SON	1.01756	-0.44167
27.195	27.2761	27.4895	26.7154	26.5928	27.3273						10	2925700000	0.841739	0.433202	-0.44171	-0.355194	YWHAQ	0.841739	-0.44171
32.643	32.6339	32.6244	32.2471	32.2868	32.0309						46	135090000000	2.29881	0.337728	-0.445489	-0.412605	VIM	2.29881	-0.445489
29.0656	28.8756	29.0531	28.5332	28.3368	28.7781						17	7384700000	1.46983	0.36866	-0.448742	-0.393077	PRPF4B	1.46983	-0.448742
23.52	23.2041	23.1018	24.0567	22.8203	21.5925						3	215750000	0.247679	0.607056	-0.452114	-0.26249	UPF1	0.247679	-0.452114
27.7995	27.4202	27.301	27.355	27.1851	26.612						27	3981800000	0.777715	0.426323	-0.456175	-0.359089	LMNB2	0.777715	-0.456175
30.7737	30.7375	30.7364	30.2096	30.2354	30.4231						33	28327000000	2.59339	0.310179	-0.459853	-0.43041	DDX3X	2.59339	-0.459853
24.7509	24.7386	24.6762	24.2804	23.8854	24.6029						2	381300000	1.04793	0.379271	-0.465677	-0.385249	RANBP1	1.04793	-0.465677
26.8963	26.1234	26.5648	26.8791	26.8016	24.4772						2	2306200000	0.22716	0.608392	-0.475563	-0.26141	RPL29	0.22716	-0.475563
24.7667	24.6979	24.6481	23.7401	23.9468	24.9841						3	332210000	0.550493	0.447601	-0.480568	-0.34663	BYSL	0.550493	-0.480568
30.1452	30.3758	30.3069	30.1593	30.1367	29.0836						37	27438000000	0.597624	0.433155	-0.482739	-0.35459	LMNB1	0.597624	-0.482739
26.4915	26.7506	26.5002	26.3053	26.3265	25.6538						13	1803100000	0.961096	0.368786	-0.485574	-0.392678	RBM14	0.961096	-0.485574
25.9751	25.3264	25.6808	24.7553	25.2471	25.4966						11	870050000	0.794616	0.381456	-0.494439	-0.384063	EPB41L3	0.794616	-0.494439
27.3474	27.4842	28.2478	27.3143	27.1653	27.0076						8	3578000000	0.838244	0.340843	-0.530717	-0.410208	ANXA2	0.838244	-0.530717
25.962	25.3675	26.1029	25.2968	25.3298	25.2033						5	699410000	1.09918	0.302815	-0.53419	-0.434826	PAK1IP1	1.09918	-0.53419
25.3634	25.2804	25.3072	25.1132	24.8434	24.3443						5	648600000	1.14189	0.281446	-0.550076	-0.448476	TUFM	1.14189	-0.550076
25.7776	25.4542	25.3212	25.4537	25.2068	24.2234						5	1611000000	0.626853	0.360754	-0.55634	-0.397537	BCAP31	0.626853	-0.55634
24.9293	25.9234	25.0377	24.7957	24.517	24.8887						7	660350000	0.776751	0.322885	-0.563006	-0.422024	DIS3	0.776751	-0.563006
28.2176	28.3456	28.4389	27.6661	27.5159	28.1303						11	4220000000	1.34565	0.252677	-0.563255	-0.471055	NOP58	1.34565	-0.563255
24.4947	24.2693	24.0462	23.9164	23.721	23.4736						3	316060000	1.44497	0.240828	-0.566418	-0.479135	MINA	1.44497	-0.566418
24.4341	25.0868	25.2846	24.5198	24.6932	23.8815						3	535550000	0.733662	0.325024	-0.570383	-0.420549	RRP7A	0.733662	-0.570383
28.1729	28.1531	27.9308	27.4474	27.4953	27.6025						17	4341800000	2.49605	0.180552	-0.570525	-0.523344	RUVBL2	2.49605	-0.570525
23.8005	23.7441	23.2765	23.229	23.0395	22.8015						3	178730000	1.31982	0.23296	-0.583694	-0.483564	HLA-A	1.31982	-0.583694
26.3454	26.4586	26.2799	25.4731	25.5337	26.3212						7	1141700000	0.986703	0.269168	-0.585295	-0.457944	DDX31	0.986703	-0.585295
29.2524	29.1181	29.2584	28.8932	28.8884	28.0586						29	9034600000	0.994436	0.260229	-0.596198	-0.465357	THRAP3	0.994436	-0.596198
31.8343	31.8398	31.875	31.2578	31.2506	31.2508						52	57551000000	5.87364	0.113924	-0.596643	-0.589001	PARP1	5.87364	-0.596643
28.5307	28.3939	28.5545	27.8325	27.7219	28.1294						6	4996500000	1.9818	0.174136	-0.598385	-0.528819	RNPS1	1.9818	-0.598385
28.8467	28.6666	28.6069	28.0774	27.9012	28.3218						7	7706200000	1.89181	0.170867	-0.606583	-0.531315	RPL30	1.89181	-0.606583
31.1224	31.2695	31.4456	30.6103	30.8818	30.5148						10	32984000000	1.87368	0.168595	-0.610191	-0.533257	HIST1H2BM	1.87368	-0.610191
24.8488	24.7302	25.0678	24.2454	24.0482	24.512						5	386570000	1.67323	0.17758	-0.613759	-0.526008	CSNK1A1	1.67323	-0.613759
28.2592	28.4404	28.2925	27.6631	27.4312	28.0522						6	5330000000	1.50167	0.188881	-0.615194	-0.517171	RPS14	1.50167	-0.615194
26.0454	24.5503	24.6897	24.4756	24.5972	24.2849						3	575580000	0.59146	0.307179	-0.642555	-0.432576	HRAS	0.59146	-0.642555
25.839	25.6522	25.6491	25.2174	25.3747	24.5971						4	853370000	1.24371	0.182288	-0.650341	-0.522142	CHTOP	1.24371	-0.650341
27.2541	27.2853	26.9453	27.1136	27.0861	25.3223						6	3251300000	0.470405	0.342936	-0.654265	-0.408296	RPL35A	0.470405	-0.654265
25.8633	25.6298	25.86	25.0357	25.0416	25.2895						5	689800000	2.36086	0.109866	-0.662135	-0.594436	MCM4	2.36086	-0.662135
29.4304	29.0173	29.0674	28.2995	28.3745	28.8537						18	7972100000	1.42124	0.156899	-0.662481	-0.544364	PSIP1	1.42124	-0.662481
27.6448	27.735	27.6007	27.0424	26.9364	26.9982						10	2655300000	3.7382	0.0827038	-0.667815	-0.635971	SCAF4	3.7382	-0.667815
26.0242	26.0262	26.0772	25.3127	25.2705	25.5326						6	851070000	2.89301	0.0925878	-0.670607	-0.619169	SNRPB2	2.89301	-0.670607
28.4596	28.2259	28.1331	27.9627	28.0031	26.8397						8	7024200000	0.787062	0.236821	-0.671045	-0.481575	RPL19	0.787062	-0.671045
27.7073	27.8498	27.4909	27.1286	26.933	26.957						7	2775300000	2.29719	0.101293	-0.676455	-0.603362	CPNE3	2.29719	-0.676455
24.8191	24.8447	24.8682	24.5074	24.6285	23.3238						2	485920000	0.763199	0.228461	-0.690789	-0.48769	CCNB1	0.763199	-0.690789
25.8017	26.1251	25.9292	25.2442	25.2035	25.3011						3	1264000000	2.694	0.0803277	-0.702419	-0.639596	NAP1L1	2.694	-0.702419
27.8964	27.8624	28.0065	27.3199	27.3015	26.9954						18	3906600000	2.48609	0.0778112	-0.716133	-0.642925	RBM26	2.48609	-0.716133
25.3154	25.1187	25.3353	24.7617	24.771	24.0515						3	546890000	1.37078	0.117635	-0.728378	-0.583575	QKI	1.37078	-0.728378
25.7559	25.8967	25.7588	26.3293	26.2216	22.6565						2	1735400000	0.239735	0.473456	-0.734673	-0.332793	NDUFS7	0.239735	-0.734673
25.4516	25.2188	25.2196	24.5267	24.5676	24.5781						3	482590000	3.13809	0.0551657	-0.739155	-0.685021	CFAP20	3.13809	-0.739155
25.6918	25.7524	26.0068	25.1824	24.8167	25.1285						5	662370000	2.18209	0.0608092	-0.774507	-0.673882	PES1	2.18209	-0.774507
24.1512	23.9858	24.0719	23.7124	23.6947	22.4549						3	232260000	0.868807	0.1517	-0.782288	-0.55131	GTPBP6	0.868807	-0.782288
27.1437	26.5142	26.5524	26.2232	25.4341	26.1992						9	1319300000	1.1193	0.113421	-0.784582	-0.590071	YY1	1.1193	-0.784582
26.4331	26.5922	27.1195	25.7578	25.7849	26.2449						15	1493700000	1.40411	0.0891783	-0.785709	-0.623195	HELLS	1.40411	-0.785709
27.8979	27.9999	27.4399	27.0396	27.2414	26.6826						7	2325500000	1.53771	0.0802377	-0.791381	-0.639575	DNAJA1	1.53771	-0.791381
28.5966	28.7503	28.7182	27.8146	27.8766	27.9463			+	SS18-SSX1_GFP		14	5963500000	3.74847	0.0306634	-0.809197	-0.763172	ELAVL1	3.74847	-0.809197
30.4404	30.6274	30.2669	29.7953	29.6958	29.4038			+	SS18-SSX1_GFP		18	20399000000	2.18028	0.0482394	-0.813254	-0.702915	RPS3A	2.18028	-0.813254
30.1246	30.2154	30.0608	29.3554	29.3223	29.2719			+	SS18-SSX1_GFP		27	15962000000	4.05266	0.0280493	-0.817067	-0.777438	BCLAF1	4.05266	-0.817067
27.1649	27.5643	27.402	26.7334	26.9335	26.0099						3	2732600000	1.26476	0.0871876	-0.818132	-0.627627	DYNLL1	1.26476	-0.818132
30.6724	30.6597	30.5593	29.7465	29.9007	29.783			+	SS18-SSX1_GFP		42	19516000000	3.81853	0.0283985	-0.820421	-0.774942	SRRM2	3.81853	-0.820421
29.8447	29.5669	29.537	28.7416	28.6487	29.0254			+	SS18-SSX1_GFP		5	10787000000	2.31204	0.0372933	-0.844328	-0.734334	ERH	2.31204	-0.844328
28.7484	28.6983	28.7068	27.7949	27.8715	27.9203			+	SS18-SSX1_GFP		17	4812500000	4.5645	0.0206898	-0.855591	-0.822968	DDX56	4.5645	-0.855591
28.6922	28.6742	28.5946	27.6751	27.8338	27.869			+	SS18-SSX1_GFP		8	4814300000	3.6812	0.0231929	-0.86105	-0.807166	NUDT21	3.6812	-0.86105
29.3671	29.4748	29.5468	28.6735	28.5807	28.5504			+	SS18-SSX1_GFP		12	9014500000	3.75334	0.02275	-0.861366	-0.809545	PRDX1	3.75334	-0.861366
28.8041	28.7454	28.5954	27.9763	27.8884	27.6599			+	SS18-SSX1_GFP		16	5534000000	2.82252	0.0260917	-0.873452	-0.784824	RCC2	2.82252	-0.873452
32.9802	32.8103	32.795	32.1573	32.1246	31.6741			+	SS18-SSX1_GFP		19	109780000000	2.20212	0.0326288	-0.876542	-0.751221	SLC25A5	2.20212	-0.876542
25.0666	25.106	24.921	24.1444	23.9747	24.2973			+	SS18-SSX1_GFP		5	465060000	2.9189	0.0232516	-0.892365	-0.80478	LDHB	2.9189	-0.892365
27.5931	27.5994	27.8092	26.8708	27.1175	26.3054			+	SS18-SSX1_GFP		6	3376800000	1.64334	0.0428005	-0.90265	-0.721744	SLC16A1	1.64334	-0.90265
27.6555	27.6842	27.6854	27.087	26.3795	26.8319			+	SS18-SSX1_GFP		5	2109500000	1.92839	0.0321358	-0.908927	-0.752986	DLST	1.92839	-0.908927
29.3859	29.6508	29.541	28.8044	28.7848	28.2001			+	SS18-SSX1_GFP		6	10973000000	1.92237	0.0298195	-0.929464	-0.766482	RPL27A	1.92237	-0.929464
28.4458	28.0393	28.2266	26.932	26.9238	27.9851			+	SS18-SSX1_GFP		5	4015500000	1.21047	0.0497477	-0.956905	-0.697717	TXN	1.21047	-0.956905
27.962	27.9586	27.8734	26.9943	27.0679	26.8437			+	SS18-SSX1_GFP		7	3081400000	3.7408	0.0121238	-0.962661	-0.897947	ZNF207	3.7408	-0.962661
29.0487	29.0468	28.9473	28.1151	28.1577	27.8228			+	SS18-SSX1_GFP		42	15035000000	3.05393	0.0133205	-0.982375	-0.884659	AMOT	3.05393	-0.982375
27.2634	27.2817	27.2796	26.8264	26.7526	25.2758						4	2735600000	0.915273	0.0693925	-0.989954	-0.657752	RPS27	0.915273	-0.989954
25.4602	26.286	25.8762	24.7966	25.0059	24.843			+	SS18-SSX1_GFP		4	642730000	1.80056	0.0244962	-0.992355	-0.795994	CXorf56	1.80056	-0.992355
26.4889	26.3159	26.1185	25.4415	25.5699	24.9321			+	SS18-SSX1_GFP		2	703970000	1.95552	0.0222631	-0.993217	-0.812635	H1F0	1.95552	-0.993217
29.7158	29.6184	29.7804	28.4514	28.3823	29.2784			+	SS18-SSX1_GFP		24	9031500000	1.57653	0.0283636	-1.00084	-0.774819	PUM3	1.57653	-1.00084
26.7627	26.9414	26.5482	25.4059	25.5533	26.2882			+	SS18-SSX1_GFP		7	1348500000	1.55963	0.0287117	-1.00165	-0.77312	PRPF38A	1.55963	-1.00165
29.211	29.2836	29.269	28.4655	28.5393	27.7236			+	SS18-SSX1_GFP		9	9240800000	1.74481	0.0237828	-1.0117	-0.80202	RPL26	1.74481	-1.0117
26.7379	26.9987	26.7965	25.6352	25.7987	26.0389			+	SS18-SSX1_GFP		9	1700100000	2.70855	0.0122392	-1.02009	-0.893739	EBNA1BP2	2.70855	-1.02009
28.9321	28.9021	29.0275	27.8931	27.7185	28.184			+	SS18-SSX1_GFP		7	4232100000	2.71653	0.0120728	-1.02202	-0.895759	SRSF11	2.71653	-1.02202
27.7901	28.1449	27.9362	27.2485	27.0579	26.4957			+	SS18-SSX1_GFP		9	3170400000	1.83525	0.0209037	-1.02303	-0.819532	NME2	1.83525	-1.02303
29.3894	29.2708	29.1914	27.9887	28.0137	28.7641			+	SS18-SSX1_GFP		15	5792100000	1.77148	0.0217238	-1.02837	-0.815619	DDX18	1.77148	-1.02837
31.5529	30.7901	30.9389	30.1894	30.1737	29.7918			+	SS18-SSX1_GFP		9	27571000000	1.75618	0.0206632	-1.04233	-0.822537	RPS13	1.75618	-1.04233
26.771	26.7229	27.0036	25.5396	25.5641	26.237			+	SS18-SSX1_GFP		7	1358500000	1.89997	0.0175376	-1.05223	-0.845582	ABCF2	1.89997	-1.05223
28.8737	28.9638	28.7782	27.8867	27.9011	27.5923			+	SS18-SSX1_GFP		23	6106800000	3.15757	0.00772537	-1.07854	-0.968187	NAT10	3.15757	-1.07854
28.9798	28.7748	28.5904	27.9342	27.8993	27.1151			+	SS18-SSX1_GFP		12	4585300000	1.75697	0.0134973	-1.13212	-0.877561	PNN	1.75697	-1.13212
25.8732	26.1162	25.8406	25.0338	24.8997	24.4892			+	SS18-SSX1_GFP		4	592760000	2.4435	0.00828402	-1.13576	-0.958074	FAM207A	2.4435	-1.13576
24.266	24.7931	24.4177	23.4859	23.5666	23.0091			+	SS18-SSX1_GFP		2	258590000	2.08284	0.0105554	-1.13839	-0.922441	C9orf114	2.08284	-1.13839
26.8247	25.9937	26.4363	25.5082	25.6719	24.6515			+	SS18-SSX1_GFP		7	983760000	1.34359	0.0214494	-1.14103	-0.816678	NOC4L	1.34359	-1.14103
26.9742	26.4909	26.5943	25.601	25.5443	25.4025			+	SS18-SSX1_GFP		7	971890000	2.74829	0.0056375	-1.17055	-1.01055	RRP8	2.74829	-1.17055
27.4686	27.4207	27.4398	25.9303	26.2218	26.5793			+	SS18-SSX1_GFP		6	1392100000	2.50715	0.00562871	-1.19919	-1.00926	MORF4L1	2.50715	-1.19919
25.7694	25.5669	25.8983	25.2321	25.5867	22.8182						6	652470000	0.615383	0.0801478	-1.1992	-0.63954	TAF15	0.615383	-1.1992
25.3754	24.5114	24.5449	24.1214	23.6868	23.0128			+	SS18-SSX1_GFP		3	309040000	1.31456	0.0177008	-1.2036	-0.842389	RPP25L	1.31456	-1.2036
26.3437	25.8962	25.2968	24.4886	24.4296	24.9539			+	SS18-SSX1_GFP		5	425810000	1.61731	0.0116853	-1.22158	-0.907808	NSUN2	1.61731	-1.22158
25.5567	25.9655	25.5138	24.994	25.041	23.3123			+	SS18-SSX1_GFP		3	488210000	0.982637	0.0284335	-1.22953	-0.774993	PIK3R2	0.982637	-1.22953
28.1044	28.0572	28.1557	26.543	26.5798	27.4982			+	SS18-SSX1_GFP		4	2454900000	1.76577	0.00973082	-1.2321	-0.937839	EIF5A	1.76577	-1.2321
28.2858	28.0616	28.0602	26.8614	26.7766	27.0524			+	SS18-SSX1_GFP		11	2089700000	3.43923	0.00193151	-1.23913	-1.11555	HP1BP3	3.43923	-1.23913
29.266	29.3529	29.5115	27.7878	27.8872	28.7214			+	SS18-SSX1_GFP		10	5770900000	1.82313	0.00872727	-1.24468	-0.954042	PCBP2	1.82313	-1.24468
24.485	25.013	25.9546	24.273	24.0883	23.3469			+	SS18-SSX1_GFP		5	428330000	1.14063	0.0204536	-1.24812	-0.824061	GSN	1.14063	-1.24812
28.1436	27.8596	27.9614	26.661	26.7771	26.7781			+	SS18-SSX1_GFP		6	2850000000	3.77474	0.00145	-1.24951	-1.14456	RAN	3.77474	-1.24951
29.9768	30.1465	29.855	28.5978	28.6641	28.9447			+	SS18-SSX1_GFP		8	12305000000	3.12062	0.00209524	-1.25722	-1.10688	RPL24	3.12062	-1.25722
28.2183	28.1037	28.0617	26.7457	26.6161	27.2322			+	SS18-SSX1_GFP		10	2793400000	2.54804	0.00362276	-1.26323	-1.05863	DDX47	2.54804	-1.26323
27.65	28.2436	28.3128	26.7542	26.861	26.7829			+	SS18-SSX1_GFP		12	3008600000	2.40202	0.00375719	-1.26941	-1.04672	TCOF1	2.40202	-1.26941
30.2515	30.061	29.9204	29.0796	29.0215	28.3003			+	SS18-SSX1_GFP		14	11903000000	2.05001	0.00574806	-1.27713	-1.00691	FBL	2.05001	-1.27713
28.9491	29.1777	28.9044	27.7461	27.5891	27.854			+	SS18-SSX1_GFP		20	5318100000	3.44107	0.00146043	-1.28066	-1.14922	DDX54	3.44107	-1.28066
23.9231	22.4185	23.572	22.0384	21.9755	22.0239			+	SS18-SSX1_GFP		2	101940000	1.32923	0.0127603	-1.29194	-0.888009	SLC25A22	1.32923	-1.29194
28.2518	28.1644	28.007	26.7991	26.5267	27.2092			+	SS18-SSX1_GFP		10	2642100000	2.4492	0.00293904	-1.29609	-1.07036	PRPF38B	2.4492	-1.29609
28.6571	28.5833	28.745	27.3129	27.1097	27.6567			+	SS18-SSX1_GFP		19	3977900000	2.84224	0.00193814	-1.30206	-1.11636	HSPA5	2.84224	-1.30206
29.4781	29.3745	29.4973	28.1535	28.1604	28.1061			+	SS18-SSX1_GFP		14	6847000000	5.20953	0.000706366	-1.30994	-1.2574	GNL3	5.20953	-1.30994
29.9628	29.8494	29.6817	28.3966	28.6669	28.4689			+	SS18-SSX1_GFP		5	9456000000	3.48588	0.00130337	-1.32053	-1.18449	RPL35	3.48588	-1.32053
25.1	25.3186	24.1995	22.9357	23.9211	23.7875			+	SS18-SSX1_GFP		1	84924000	1.34375	0.0116353	-1.3246	-0.906644	HRNR	1.34375	-1.3246
27.7014	28.0415	27.9019	26.7367	27.1049	25.8189			+	SS18-SSX1_GFP		5	2889300000	1.54936	0.00871449	-1.3281	-0.952105	RPL37A	1.54936	-1.3281
25.2175	26.2759	24.4604	24.4695	24.4017	23.0921			+	SS18-SSX1_GFP		2	552900000	0.897104	0.0259702	-1.33015	-0.786388	C11orf98	0.897104	-1.33015
30.6761	30.848	30.8311	29.4139	29.4467	29.4316			+	SS18-SSX1_GFP		29	19901000000	4.77672	0.000731915	-1.35434	-1.28314	TOP1	4.77672	-1.35434
26.9828	26.9923	26.5757	24.8789	25.443	26.1417			+	SS18-SSX1_GFP		6	968950000	1.60061	0.00766112	-1.36239	-0.980013	NTHL1	1.60061	-1.36239
25.8123	25.8785	25.8101	24.9213	24.4234	24.0632			+	SS18-SSX1_GFP		3	612500000	2.26255	0.00225882	-1.36432	-1.09164	MRPL48	2.26255	-1.36432
28.9777	29.0174	29.0557	27.567	27.5771	27.8089			+	SS18-SSX1_GFP		11	5590500000	4.11523	0.000712215	-1.36592	-1.26221	BUB3	4.11523	-1.36592
26.234	26.0443	26.0603	24.4398	24.5212	25.2764			+	SS18-SSX1_GFP		5	617150000	2.12684	0.00273927	-1.36705	-1.07374	NTPCR	2.12684	-1.36705
23.8378	23.9036	24.0067	23.1405	22.9866	21.4627			+	SS18-SSX1_GFP		1	131980000	1.21129	0.0120339	-1.38611	-0.901398	MAP2K2	1.21129	-1.38611
24.175	25.4956	24.1768	23.9425	23.1615	22.5566			+	SS18-SSX1_GFP		4	101430000	1.10232	0.0136879	-1.39563	-0.874814	SP2	1.10232	-1.39563
25.4757	26.4602	25.5904	25.385	25.7161	22.237						5	786080000	0.534564	0.0739254	-1.39606	-0.64891	CCT8	0.534564	-1.39606
28.5804	28.6263	28.6436	27.593	27.4498	26.5789			+	SS18-SSX1_GFP		21	4237000000	1.94574	0.00292939	-1.40954	-1.06991	DDX50	1.94574	-1.40954
26.8195	26.3971	26.576	24.8233	25.0769	25.6197			+	SS18-SSX1_GFP		5	863600000	2.23797	0.00178397	-1.4242	-1.12595	PPIA	2.23797	-1.4242
27.2007	27.3437	27.2735	25.7634	25.7009	26.0757			+	SS18-SSX1_GFP		11	1265700000	3.49895	0.000716667	-1.42594	-1.26969	MCM5	3.49895	-1.42594
25.3247	24.8903	25.1099	24.441	23.5773	22.9646			+	SS18-SSX1_GFP		3	311410000	1.50072	0.00605556	-1.44733	-1.00076	LDHA	1.50072	-1.44733
29.0827	28.9862	29.2588	28.0688	28.2626	26.535			+	SS18-SSX1_GFP		9	9125800000	1.26363	0.00827179	-1.48712	-0.958041	RPL32	1.26363	-1.48712
25.482	24.955	24.826	23.2992	22.8895	24.5923			+	SS18-SSX1_GFP		1	279590000	1.27208	0.0080178	-1.49397	-0.963263	KLHDC1	1.27208	-1.49397
29.3196	29.7114	29.5374	28.2299	28.0742	27.7748			+	SS18-SSX1_GFP		6	7371900000	2.98731	0.000721174	-1.49654	-1.2735	RPS24	2.98731	-1.49654
26.7016	26.7751	26.6644	25.3894	25.3471	24.8745			+	SS18-SSX1_GFP		5	1079200000	3.06954	0.000739785	-1.50998	-1.29257	TFAM	3.06954	-1.50998
27.1215	27.0504	27.1352	25.666	25.8083	25.2749			+	SS18-SSX1_GFP		11	1209100000	3.14665	0.000744589	-1.5193	-1.30793	NUSAP1	3.14665	-1.5193
30.8809	30.9961	30.9867	29.4386	29.4216	29.4327			+	SS18-SSX1_GFP		12	18134000000	5.66973	0.000628272	-1.52357	-1.46884	RPS8	5.66973	-1.52357
30.1422	30.9729	30.8005	29.0031	29.0622	29.2477			+	SS18-SSX1_GFP		8	15074000000	2.36264	0.000924855	-1.53421	-1.21417	RPS6	2.36264	-1.53421
28.4807	28.4755	28.5856	26.5818	26.6837	27.5927			+	SS18-SSX1_GFP		16	2244500000	2.07206	0.00129609	-1.56123	-1.17976	SLIT2	2.07206	-1.56123
29.1727	29.1321	29.33	27.6861	27.5457	27.689			+	SS18-SSX1_GFP		22	5480900000	4.47554	0.000616967	-1.57134	-1.45946	EEF2	4.47554	-1.57134
27.2857	27.3709	27.4651	25.4757	25.2087	26.7029			+	SS18-SSX1_GFP		5	1225400000	1.56765	0.0027529	-1.57815	-1.07872	PPIG	1.56765	-1.57815
29.8879	29.9822	30.1407	28.5253	28.4694	28.1547			+	SS18-SSX1_GFP		10	12235000000	3.53496	0.000583942	-1.62044	-1.4253	RPS11	3.53496	-1.62044
25.608	25.2708	24.1751	23.4528	23.287	23.314			+	SS18-SSX1_GFP		3	317860000	1.72877	0.00126316	-1.66674	-1.16103	POP4	1.72877	-1.66674
29.6793	29.7244	29.8081	28.0669	28.2013	27.9011			+	SS18-SSX1_GFP		5	7385000000	4.22836	0.000670391	-1.68085	-1.53549	RPS15	4.22836	-1.68085
28.7794	29.7176	30.7312	27.7858	27.5746	28.8209			+	SS18-SSX1_GFP		13	5104300000	1.15897	0.00624615	-1.68231	-0.999834	SRBD1	1.15897	-1.68231
25.5399	24.3065	24.6647	23.0178	22.9989	23.3798			+	SS18-SSX1_GFP		5	155680000	1.93504	0.000948617	-1.70486	-1.22942	SERPINA3	1.93504	-1.70486
26.3066	25.7107	25.5579	24.5908	24.8694	22.9978			+	SS18-SSX1_GFP		2	361420000	1.27769	0.0035648	-1.70572	-1.04893	TRMT112	1.27769	-1.70572
25.9695	26.4323	25.1331	24.949	24.2038	23.263			+	SS18-SSX1_GFP		4	558560000	1.29331	0.00359355	-1.70638	-1.05432	ZRANB2	1.29331	-1.70638
29.5696	29.4789	29.5894	28.0743	28.0153	27.4187			+	SS18-SSX1_GFP		6	6165600000	2.8906	0.00057554	-1.7099	-1.41066	TMA16	2.8906	-1.7099
30.8822	30.7191	30.6498	28.9874	28.9643	29.0106			+	SS18-SSX1_GFP		18	13052000000	4.82663	0	-1.76291	-1.64731	PUF60	4.82663	-1.76291
30.1951	29.8886	30.0625	28.7114	28.6974	27.4109			+	SS18-SSX1_GFP		8	11549000000	1.80434	0.000954274	-1.77548	-1.23279	RPL23A	1.80434	-1.77548
28.5226	28.3609	28.2686	26.4661	26.4396	26.8104			+	SS18-SSX1_GFP		5	2875300000	3.67933	0.000729483	-1.812	-1.58859	SRP9	3.67933	-1.812
24.0604	24.0038	24.0357	23.1049	21.2336	22.3234			+	SS18-SSX1_GFP		3	52299000	1.53968	0.00128413	-1.81271	-1.17489	FLG2	1.53968	-1.81271
25.8953	25.2812	24.8018	23.0332	23.6635	23.7725			+	SS18-SSX1_GFP		3	345310000	2.02828	0.000754386	-1.83641	-1.31977	RRP1	2.02828	-1.83641
26.7021	26.7603	26.1664	24.8865	24.8559	24.287			+	SS18-SSX1_GFP		5	648640000	2.62965	0.000626632	-1.86648	-1.46791	EMG1	2.62965	-1.86648
27.4283	26.8845	27.046	24.9281	25.1078	25.6896			+	SS18-SSX1_GFP		9	1032000000	2.58531	0.000625	-1.87774	-1.46614	MCM6	2.58531	-1.87774
29.194	29.1539	29.175	27.8406	27.9639	26.0292			+	SS18-SSX1_GFP		18	5802200000	1.41228	0.00127473	-1.89642	-1.1667	NOLC1	1.41228	-1.89642
25.6721	25.522	25.7798	22.4813	24.2681	24.4899			+	SS18-SSX1_GFP		5	448490000	1.39254	0.00127007	-1.91156	-1.16545	MRPL22	1.39254	-1.91156
31.541	31.5788	31.6148	29.4059	29.4748	30.0616			+	SS18-SSX1_GFP		15	18760000000	3.11631	0.000731707	-1.93075	-1.59681	PCBP1	3.11631	-1.93075
30.945	31.0194	30.8796	28.8978	28.9443	29.2093			+	SS18-SSX1_GFP		23	14328000000	4.2876	0	-1.93087	-1.74729	RSL1D1	4.2876	-1.93087
28.7645	28.5921	28.3525	27.3579	27.0278	25.4836			+	SS18-SSX1_GFP		3	4277800000	1.52384	0.0009375	-1.94658	-1.22436	RPS26P11	1.52384	-1.94658
25.3037	25.7438	26.0118	24.3603	24.0677	22.7476			+	SS18-SSX1_GFP		3	409860000	1.66224	0.000724211	-1.96121	-1.27578	MRPL9	1.66224	-1.96121
26.8129	27.494	27.1794	24.9061	25.5852	25.0144			+	SS18-SSX1_GFP		9	1103400000	2.63928	0.000681818	-1.99351	-1.54742	GAPDH	2.63928	-1.99351
24.8525	25.1147	24.9006	21.9539	23.4712	23.4124			+	SS18-SSX1_GFP		2	128520000	1.79175	0.000533333	-2.01013	-1.33764	CFB	1.79175	-2.01013
30.64	30.7883	31.019	28.9302	28.7953	28.6501			+	SS18-SSX1_GFP		30	12519000000	3.91606	0	-2.02392	-1.78045	DDX41	3.91606	-2.02392
27.0155	27.0354	26.8658	25.019	24.7639	25.056			+	SS18-SSX1_GFP		6	826790000	4.35032	0	-2.02596	-1.83131	NOL7	4.35032	-2.02596
28.1923	28.2077	28.2345	26.3633	26.398	25.7612			+	SS18-SSX1_GFP		7	2046600000	3.22265	0	-2.03732	-1.68777	CMSS1	3.22265	-2.03732
25.9962	24.5483	25.5665	23.4319	23.5974	22.9674			+	SS18-SSX1_GFP		4	377620000	1.91393	0.000564706	-2.03811	-1.38749	NOP16	1.91393	-2.03811
30.9408	30.9242	30.6513	29.1009	29.166	28.1302			+	SS18-SSX1_GFP		14	18418000000	2.37443	0.000653951	-2.03972	-1.51332	RPS18	2.37443	-2.03972
29.4737	29.4263	29.4031	26.8472	26.6181	28.703			+	SS18-SSX1_GFP		6	4432900000	1.43947	0.000952381	-2.04492	-1.23155	SRP14	1.43947	-2.04492
24.7677	26.2026	25.5409	23.5661	24.5795	22.1743			+	SS18-SSX1_GFP		7	347770000	1.19594	0.00143717	-2.06386	-1.13952	BRD3	1.19594	-2.06386
26.7682	26.0072	26.2249	24.2207	24.1036	24.4691			+	SS18-SSX1_GFP		4	608870000	2.9299	0	-2.06897	-1.65431	SNX9	2.9299	-2.06897
29.6592	29.7239	29.6222	27.5642	27.445	27.7819			+	SS18-SSX1_GFP		15	5321600000	4.4421	0	-2.07139	-1.8779	SREK1	4.4421	-2.07139
31.5664	31.5054	31.5107	29.4727	29.4731	29.4026			+	SS18-SSX1_GFP		43	19656000000	6.55757	0	-2.07806	-2.01661	DDX46	6.55757	-2.07806
29.7379	29.5598	29.6417	27.4291	27.7188	27.5345			+	SS18-SSX1_GFP		20	5876800000	4.52152	0	-2.08566	-1.89766	HSP90AB1	4.52152	-2.08566
25.2068	25.1716	25.0205	23.0991	23.0726	22.914			+	SS18-SSX1_GFP		2	102510000	4.87875	0	-2.10435	-1.94617	GDI2	4.87875	-2.10435
25.2003	25.3965	25.2341	23.3611	23.0689	23.034			+	SS18-SSX1_GFP		3	375370000	4.22015	0	-2.12228	-1.89473	EXOSC8	4.22015	-2.12228
27.054	26.7322	26.4634	24.6882	24.9735	24.1921			+	SS18-SSX1_GFP		9	645880000	2.76723	0	-2.13194	-1.65901	WHSC1	2.76723	-2.13194
25.9786	25.24	24.9949	23.5661	22.7135	23.5282			+	SS18-SSX1_GFP		2	178270000	2.20406	0.000657534	-2.13525	-1.5188	PON1	2.20406	-2.13525
24.9836	25.3627	25.4997	23.9581	23.0442	22.4155			+	SS18-SSX1_GFP		2	122200000	1.97344	0.000606061	-2.1427	-1.45397	FGB	1.97344	-2.1427
26.9997	27.7765	27.377	24.9326	24.853	25.8099			+	SS18-SSX1_GFP		15	1007700000	2.34473	0.000725076	-2.18586	-1.58416	HIST1H1C	2.34473	-2.18586
27.4837	26.4782	26.6621	24.3785	24.6105	25.0276			+	SS18-SSX1_GFP		5	664500000	2.42961	0.0003625	-2.20247	-1.61615	HPX	2.42961	-2.20247
26.3135	26.1876	26.2133	24.0205	24.5503	23.4821			+	SS18-SSX1_GFP		5	555140000	2.69274	0	-2.22053	-1.6941	EIF2S3	2.69274	-2.22053
25.8026	25.3971	25.7465	23.3439	23.6505	23.2881			+	SS18-SSX1_GFP		2	540240000	3.70656	0	-2.22123	-1.89903	MAFB	3.70656	-2.22123
28.8135	29.1401	28.6534	26.9047	26.9514	26.0864			+	SS18-SSX1_GFP		13	3360500000	2.66994	0	-2.22149	-1.68902	RBBP6	2.66994	-2.22149
26.6367	25.3079	26.7218	24.73	23.956	23.2939			+	SS18-SSX1_GFP		11	528320000	1.6457	0.00055814	-2.22887	-1.37765	HSP90AA1	1.6457	-2.22887
28.6204	28.6411	28.6485	26.2716	26.0923	26.8252			+	SS18-SSX1_GFP		9	2137100000	3.27523	0	-2.24035	-1.83525	TSR3	3.27523	-2.24035
27.1272	27.1961	27.5991	24.7475	24.7396	25.5573			+	SS18-SSX1_GFP		5	896440000	2.75621	0	-2.29268	-1.75197	PCMT1	2.75621	-2.29268
31.8518	32.3362	32.3911	29.9037	29.8908	29.9051			+	SS18-SSX1_GFP		9	28392000000	3.74343	0	-2.29317	-1.95761	RPL23	3.74343	-2.29317
24.9437	24.8744	25.4204	22.797	22.9459	22.5363			+	SS18-SSX1_GFP		3	274490000	3.42422	0	-2.31976	-1.91836	RPP40	3.42422	-2.31976
31.9856	31.9157	31.8517	29.5867	29.4638	29.6998			+	SS18-SSX1_GFP		12	26960000000	5.12154	0	-2.33427	-2.16467	EEF1A1P5	5.12154	-2.33427
25.8464	25.5637	25.3497	22.6829	22.9961	24.0496			+	SS18-SSX1_GFP		3	190380000	2.23158	0.000369427	-2.34373	-1.6302	FAM76B	2.23158	-2.34373
26.7643	27.0376	26.9943	24.8467	24.8731	24.025			+	SS18-SSX1_GFP		7	716570000	2.89383	0	-2.3505	-1.82063	RPUSD3	2.89383	-2.3505
32.5868	32.4549	32.2855	30.6361	30.7976	28.8106			+	SS18-SSX1_GFP		15	41768000000	1.67034	0.000588235	-2.36097	-1.43694	HIST1H1E	1.67034	-2.36097
34.5251	34.5814	34.6741	32.0003	31.9425	32.7477			+	SS18-SSX1_GFP		21	139980000000	3.07173	0	-2.3634	-1.87138	U2AF2	3.07173	-2.3634
28.685	28.9454	28.8303	26.2578	26.0636	27.0358			+	SS18-SSX1_GFP		8	2300800000	2.82085	0	-2.36778	-1.81239	NIFK	2.82085	-2.36778
30.8538	30.7614	30.7405	28.2313	28.2494	28.757			+	SS18-SSX1_GFP		21	9926800000	3.75858	0	-2.37264	-2.01792	GLYR1	3.75858	-2.37264
32.5635	32.4847	32.4996	30.6865	30.4866	29.1862			+	SS18-SSX1_GFP		18	42213000000	2.1523	0.000368254	-2.39619	-1.62899	RPS4X	2.1523	-2.39619
28.4118	28.2013	28.1017	25.9456	26.2083	25.3637			+	SS18-SSX1_GFP		4	1744000000	3.07866	0	-2.39908	-1.89534	THYN1	3.07866	-2.39908
28.4689	28.437	28.3136	26.1223	25.8257	26.0727			+	SS18-SSX1_GFP		7	2044100000	4.69271	0	-2.39961	-2.1751	RPL7L1	4.69271	-2.39961
24.9788	24.9644	25.1106	22.8636	22.4199	22.4722			+	SS18-SSX1_GFP		2	167050000	4.10138	0	-2.43272	-2.11998	SSBP1	4.10138	-2.43272
26.0524	26.7686	26.5168	23.5174	23.5763	24.6902			+	SS18-SSX1_GFP		4	332520000	2.35262	0	-2.51798	-1.75425	CP	2.35262	-2.51798
25.3511	27.6535	25.3672	23.7183	23.7872	23.3113			+	SS18-SSX1_GFP		4	490520000	1.49621	0.000578313	-2.51834	-1.41554	HBA1;	1.49621	-2.51834
28.8578	28.9265	29.0257	26.4522	26.5334	26.243			+	SS18-SSX1_GFP		23	2470300000	4.84926	0	-2.52718	-2.29892	DDX28	4.84926	-2.52718
31.8966	31.9635	31.8828	29.7214	29.5566	28.8342			+	SS18-SSX1_GFP		17	22084000000	3.12803	0	-2.54358	-1.99718	LUC7L	3.12803	-2.54358
28.0213	27.693	28.0042	25.6397	25.1371	25.2644			+	SS18-SSX1_GFP		13	1551000000	3.80262	0	-2.55909	-2.15999	NSUN5	3.80262	-2.55909
25.7157	27.0611	25.4129	24.0036	23.8473	22.6475			+	SS18-SSX1_GFP		4	508500000	1.74292	0.000676056	-2.56374	-1.54129	MTHFD2	1.74292	-2.56374
33.965	33.7568	33.8292	31.4991	31.2921	30.9481			+	SS18-SSX1_GFP		13	89815000000	3.95603	0	-2.60392	-2.22201	U2AF1	3.95603	-2.60392
24.9063	24.6986	24.8991	22.8333	21.2203	22.576			+	SS18-SSX1_GFP		2	83727000	2.18541	0	-2.62483	-1.74411	ANXA5	2.18541	-2.62483
35.1878	35.1892	35.1702	32.3625	32.3497	32.9203			+	SS18-SSX1_GFP		30	193250000000	3.82318	0	-2.63827	-2.22038	RBM39	3.82318	-2.63827
24.6009	24.8194	27.2814	22.6722	22.6551	23.3921			+	SS18-SSX1_GFP		2	323870000	1.38975	0.000570071	-2.66076	-1.40555	RPTOR	1.38975	-2.66076
26.0313	25.818	25.8207	23.8959	23.0641	22.6316			+	SS18-SSX1_GFP		4	331100000	2.68924	0	-2.6928	-1.95464	ZNF146	2.68924	-2.6928
27.2247	27.8113	27.8616	26.0884	25.806	22.9129			+	SS18-SSX1_GFP		6	1625700000	1.22393	0.000756044	-2.69676	-1.32512	SNIP1	1.22393	-2.69676
33.068	33.1771	33.2182	30.3042	30.3306	30.6581			+	SS18-SSX1_GFP		20	44817000000	4.61811	0	-2.72342	-2.42659	LUC7L3	4.61811	-2.72342
26.8558	27.0561	27.0122	25.3207	24.7626	22.1557			+	SS18-SSX1_GFP		6	845760000	1.38242	0.000623377	-2.89506	-1.46418	TFB1M	1.38242	-2.89506
26.3578	25.2139	25.2639	21.964	23.1656	22.9801			+	SS18-SSX1_GFP		1	254950000	2.27587	0	-2.90862	-1.90353	LRP1	2.27587	-2.90862
26.9414	26.5016	26.545	23.5293	23.764	23.9078			+	SS18-SSX1_GFP		4	341390000	4.09575	0	-2.92899	-2.48599	C1R	4.09575	-2.92899
25.8856	26.5411	27.3553	22.9997	24.4629	23.5166			+	SS18-SSX1_GFP		3	466030000	2.08262	0	-2.93428	-1.8299	FGG	2.08262	-2.93428
30.4703	30.3281	30.4873	27.5074	27.3829	27.5811			+	SS18-SSX1_GFP		11	7453000000	5.55492	0	-2.93811	-2.72859	MMTAG2	5.55492	-2.93811
27.8551	27.8199	27.915	24.7201	25.2115	24.7594			+	SS18-SSX1_GFP		10	1039100000	4.30172	0	-2.96631	-2.55698	TAF2	4.30172	-2.96631
25.9666	26.8769	26.1637	24.5191	22.4512	22.9717			+	SS18-SSX1_GFP		3	322240000	1.94734	0	-3.02171	-1.79888	DDX55	1.94734	-3.02171
24.9626	24.9096	26.9681	22.7533	22.4256	22.5676			+	SS18-SSX1_GFP		2	280550000	1.94261	0	-3.0313	-1.79995	PGLS	1.94261	-3.0313
27.6979	27.7184	27.4725	24.6861	24.673	24.3257			+	SS18-SSX1_GFP		4	1085600000	4.56767	0	-3.06797	-2.68676	YBX1	4.56767	-3.06797
28.3941	28.7849	28.692	25.8264	25.9845	24.7699			+	SS18-SSX1_GFP		9	1971300000	2.82785	0	-3.09673	-2.21341	NKAP	2.82785	-3.09673
26.2199	28.9241	26.0146	24.9638	24.1413	22.7268			+	SS18-SSX1_GFP		3	861880000	1.27618	0.000603015	-3.1089	-1.45096	BPTF	1.27618	-3.1089
28.8119	28.8457	28.5642	26.2815	26.1736	24.4273			+	SS18-SSX1_GFP		2	2200500000	2.16365	0	-3.11312	-1.93675	HBD	2.16365	-3.11312
28.609	29.0493	28.8322	25.6717	25.7904	25.5535			+	SS18-SSX1_GFP		5	2021000000	4.58811	0	-3.15827	-2.7599	H1FX	4.58811	-3.15827
30.7106	30.7686	30.3837	27.8005	28.0802	26.4668			+	SS18-SSX1_GFP		16	7824500000	2.46197	0	-3.17181	-2.09778	MAZ	2.46197	-3.17181
30.2733	30.3984	29.846	26.9109	26.7093	27.3454			+	SS18-SSX1_GFP		17	5085300000	3.6504	0	-3.18406	-2.54447	TRIM21	3.6504	-3.18406
29.0271	29.2233	28.8288	27.3661	27.3289	22.7845			+	SS18-SSX1_GFP		4	4603300000	0.983366	0.000715177	-3.19987	-1.26712	RPL36A	0.983366	-3.19987
34.0862	34.2704	34.0496	31.2488	31.2076	30.3107			+	SS18-SSX1_GFP		20	94280000000	3.29111	0	-3.21299	-2.44595	LUC7L2	3.29111	-3.21299
26.4235	26.0367	26.5252	22.3427	23.331	23.6175			+	SS18-SSX1_GFP		3	325700000	2.83829	0	-3.23145	-2.28564	TF	2.83829	-3.23145
30.1363	30.1012	30.0401	26.812	26.7291	26.9215			+	SS18-SSX1_GFP		12	5095900000	6.10114	0	-3.27166	-3.07949	DIMT1	6.10114	-3.27166
27.064	26.3929	26.9319	24.2648	24.3654	21.8082			+	SS18-SSX1_GFP		5	666970000	1.73843	0	-3.31682	-1.78233	SFSWAP	1.73843	-3.31682
29.975	30.036	30.0765	26.797	26.736	26.5763			+	SS18-SSX1_GFP		8	4763600000	5.87906	0	-3.32609	-3.10239	RP9	5.87906	-3.32609
28.2022	28.2625	27.9233	24.6428	24.8101	24.7624			+	SS18-SSX1_GFP		9	1251600000	5.0928	0	-3.3909	-3.0392	CWC25	5.0928	-3.3909
26.3852	27.024	25.8466	23.4638	22.7836	22.6594			+	SS18-SSX1_GFP		6	412260000	2.91277	0	-3.44966	-2.42546	KDM4D	2.91277	-3.44966
27.2839	28.3327	28.4312	25.2388	25.2559	23.1857			+	SS18-SSX1_GFP		5	971140000	1.9441	0	-3.45582	-1.94242	C4A	1.9441	-3.45582
30.6492	30.7718	30.684	28.5231	28.5136	24.1959			+	SS18-SSX1_GFP		6	12175000000	1.18218	0.00064	-3.62415	-1.48453	RPS23	1.18218	-3.62415
30.7652	30.8991	30.5794	27.4079	27.4675	26.4723			+	SS18-SSX1_GFP		15	8794200000	3.38475	0	-3.63197	-2.71988	PHF6	3.38475	-3.63197
31.4236	31.0366	31.2225	27.7898	27.808	27.1304			+	SS18-SSX1_GFP		26	11301000000	3.8978	0	-3.6515	-2.92269	ALB	3.8978	-3.6515
28.5154	28.3098	28.5798	24.9842	24.741	24.7047			+	SS18-SSX1_GFP		12	1849100000	5.16544	0	-3.65834	-3.2672	TRMT10C	5.16544	-3.65834
29.2158	29.5634	29.2717	25.9025	26.0253	25.0741			+	SS18-SSX1_GFP		9	2869400000	3.50052	0	-3.68298	-2.79528	RBMX2	3.50052	-3.68298
29.6236	29.5658	29.7293	26.1785	26.2048	25.4336			+	SS18-SSX1_GFP		7	3272200000	3.86708	0	-3.70062	-2.94331	C3	3.86708	-3.70062
32.2483	32.3592	32.2892	28.6727	28.5209	28.5998			+	SS18-SSX1_GFP		11	21408000000	6.55038	0	-3.70108	-3.50982	ARL6IP4	6.55038	-3.70108
28.6213	28.891	29.0179	25.3035	25.4892	24.5662			+	SS18-SSX1_GFP		7	1942300000	3.58686	0	-3.72379	-2.85312	SREK1IP1	3.58686	-3.72379
25.733	27.8614	26.8758	22.8093	23.7084	22.5164			+	SS18-SSX1_GFP		5	471310000	2.23159	0	-3.81202	-2.22678	ZNF593	2.23159	-3.81202
27.601	27.7363	27.5356	23.9308	23.7728	23.7212			+	SS18-SSX1_GFP		8	795000000	5.8036	0	-3.81603	-3.51252	PKM	5.8036	-3.81603
30.6942	30.8065	30.8619	26.5722	26.6178	27.362			+	SS18-SSX1_GFP		28	6382400000	3.95033	0	-3.93684	-3.12269	BCAR1	3.95033	-3.93684
27.5325	27.5347	27.9967	24.4135	23.6781	23.098			+	SS18-SSX1_GFP		6	862280000	3.188	0	-3.95811	-2.80566	APOA1	3.188	-3.95811
32.2594	32.4948	32.2728	28.4488	28.3644	28.288			+	SS18-SSX1_GFP		12	19809000000	5.81674	0	-3.97529	-3.64929	FAM133B	5.81674	-3.97529
31.9947	32.0723	32.0199	28.105	28.1124	27.7637			+	SS18-SSX1_GFP		7	15431000000	5.37097	0	-4.03526	-3.6117	SNRNP27	5.37097	-4.03526
27.6172	27.8161	27.8035	23.97	23.5649	23.4386			+	SS18-SSX1_GFP		9	874160000	4.72377	0	-4.08777	-3.48578	CLK3	4.72377	-4.08777
32.7619	32.7991	32.4436	29.0966	28.8799	27.6785			+	SS18-SSX1_GFP		3	25068000000	3.08164	0	-4.11653	-2.82878	RPL39P5	3.08164	-4.11653
27.9616	28.6684	28.6659	25.102	24.999	22.8247			+	SS18-SSX1_GFP		8	1635100000	2.21383	0	-4.12342	-2.31798	PRPS1	2.21383	-4.12342
27.4822	27.2644	27.8779	23.5498	23.1866	23.4354			+	SS18-SSX1_GFP		7	665120000	4.41997	0	-4.1509	-3.43293	CIR1	4.41997	-4.1509
30.9763	31.1833	31.1402	26.9141	27.0615	26.8446			+	SS18-SSX1_GFP		12	8517700000	5.88645	0	-4.15987	-3.8171	ZCCHC17	5.88645	-4.15987
28.4565	26.9485	28.6912	25.4315	22.74	23.1899			+	SS18-SSX1_GFP		7	1102600000	1.88575	0	-4.24493	-2.12729	A2M	1.88575	-4.24493
27.778	27.6739	25.8253	22.1078	22.027	23.8999			+	SS18-SSX1_GFP		5	532810000	2.12887	0	-4.41412	-2.34683	FCF1	2.12887	-4.41412
28.4121	27.6419	26.8185	24.1057	23.1372	22.2741			+	SS18-SSX1_GFP		5	712600000	2.50139	0	-4.45181	-2.61696	CENPV	2.50139	-4.45181
27.3719	27.0814	27.4284	22.6671	22.7864	22.3738			+	SS18-SSX1_GFP		7	530510000	5.05892	0	-4.6848	-4.02806	EIF2B1	5.05892	-4.6848
27.5305	27.1284	29.2186	22.8958	22.0017	24.5469			+	SS18-SSX1_GFP		2	1409100000	2.09317	0	-4.81102	-2.42648	VPS13A	2.09317	-4.81102
27.2679	28.6569	28.7139	23.3523	23.2847	23.4687			+	SS18-SSX1_GFP		6	1051500000	3.28047	0	-4.84433	-3.28249	FN1	3.28047	-4.84433
28.9379	28.7759	28.7207	24.0614	23.9427	23.8875			+	SS18-SSX1_GFP		7	1866300000	6.28971	0	-4.84762	-4.47634	NSA2	6.28971	-4.84762
35.6399	35.7935	35.6197	31.2498	31.5052	29.7064			+	SS18-SSX1_GFP		17	199880000000	3.00094	0	-4.8639	-3.10877	ARGLU1	3.00094	-4.8639
33.1233	33.2768	33.2249	27.6605	27.6746	28.3347			+	SS18-SSX1_GFP		34	30957000000	4.70662	0	-5.3184	-4.3347	KRT1	4.70662	-5.3184
31.5508	31.5728	31.6864	26.2395	25.9885	26.4256			+	SS18-SSX1_GFP		29	10114000000	5.64768	0	-5.38549	-4.75155	KRT2	5.64768	-5.38549
27.7565	28.8818	28.7675	22.9172	22.2684	23.8919			+	SS18-SSX1_GFP		13	1224900000	3.10942	0	-5.44277	-3.41889	KRT14	3.10942	-5.44277
28.3597	28.5302	28.4877	22.7284	22.7574	23.2648			+	SS18-SSX1_GFP		4	1278400000	5.1636	0	-5.54232	-4.69066	SSSCA1	5.1636	-5.54232
27.5963	27.1661	27.3253	21.5702	21.656	22.1216			+	SS18-SSX1_GFP		6	536440000	4.90396	0	-5.57999	-4.60244	ITIH2	4.90396	-5.57999
28.4795	28.6728	29.0288	23.0146	23.5586	22.5377			+	SS18-SSX1_GFP		4	1247200000	4.14734	0	-5.69009	-4.25926	PLG	4.14734	-5.69009
33.1998	33.158	33.1492	27.012	26.8654	26.7783			+	SS18-SSX1_GFP		8	27843000000	7.03585	0	-6.28378	-5.87295	SUB1	7.03585	-6.28378
28.7755	28.4175	28.7029	22.8923	20.9422	22.9932			+	SS18-SSX1_GFP		21	1156400000	3.14598	0	-6.35605	-3.79158	KRT5	3.14598	-6.35605
29.9488	30.0125	30.1137	23.8712	24.0371	23.092			+	SS18-SSX1_GFP		19	3227400000	4.56056	0	-6.35826	-4.90884	BRD2	4.56056	-6.35826
28.779	28.6547	28.6926	21.8479	22.6256	20.752			+	SS18-SSX1_GFP		2	1467200000	3.66688	0	-6.96698	-4.51024	RPL22L1	3.66688	-6.96698
27.4759	27.4569	27.3827	20.7715	20.8761	18.8249			+	SS18-SSX1_GFP		3	559720000	3.39655	0	-7.28102	-4.36621	ITIH4	3.39655	-7.28102
31.0125	30.9584	30.9843	25.3049	21.6174	24.1177			+	SS18-SSX1_GFP		2	6448200000	2.59318	0	-7.30504	-3.50051	C1QA	2.59318	-7.30504
31.4585	31.0454	30.9174	22.9415	25.6856	22.5083			+	SS18-SSX1_GFP		2	6774500000	2.74297	0	-7.4286	-3.69929	IGKV2D-29	2.74297	-7.4286
31.4121	31.5738	31.6268	23.6967	24.4315	24.1556			+	SS18-SSX1_GFP		23	9109500000	5.31173	0	-7.44291	-6.08163	KRT9	5.31173	-7.44291
32.8417	32.8254	32.7259	23.2691	24.6704	21.3095			+	SS18-SSX1_GFP		29	20097000000	3.24357	0	-9.71468	-4.91798	KRT10	3.24357	-9.71468
