# Supplementary material for: Targeted degradation of BRD9 reverses oncogenic gene expression in synovial sarcoma
Source: eLife. 2018 Nov 15;7:e41305. doi: 10.7554/eLife.41305 (PMC6277197; doi:10.7554/eLife.41305)
Supplement: Figure 2—figure supplement 1—source data 2. [file elife-41305-fig2-figsupp1-data2.xlsx]

## Sheet: Figure2-figure supplement 1-sd2
LFQ intensity GFP_1	LFQ intensity GFP_2	LFQ intensity GFP_3	LFQ intensity SS18_SSX2_1_161125123420	LFQ intensity SS18_SSX2_2_161125135057	LFQ intensity SS18_SSX2_3_161125150738	Only identified by site	Reverse	Student's T-test Significant SS18-SSX2_GFP	Student's T-test significant	Peptides	Intensity	-Log Student's T-test p-value SS18-SSX2_GFP	Student's T-test q-value SS18-SSX2_GFP	Student's T-test Difference SS18-SSX2_GFP	Student's T-test Test statistic SS18-SSX2_GFP	Gene ID	-Log Student's T-test p-value SS18-SSX2_GFP	Student's T-test Difference SS18-SSX2_GFP
22.1168	22.0746	21.8921	31.0755	30.7032	30.8522			+	SS18-SSX2_GFP	23	28355000000	6.57732	0	8.84918	7.84301	DPF2	6.57732	8.84918
22.088	22.4249	22.6091	31.7221	30.8019	30.8829			+	SS18-SSX2_GFP	58	49771000000	4.915	0	8.76157	6.58081	ARID1A	4.915	8.76157
24.1808	24.6856	24.8344	32.9169	32.8128	32.809			+	SS18-SSX2_GFP	64	136840000000	5.68338	0	8.2793	6.89409	SMARCA4	5.68338	8.2793
22.4417	23.0937	22.6935	30.3497	30.3449	30.4195			+	SS18-SSX2_GFP	54	24182000000	5.62613	0	7.62838	6.40317	SMARCC2	5.62613	7.62838
22.5907	23.522	22.5538	29.6309	29.5973	29.605			+	SS18-SSX2_GFP	52	13378000000	4.53456	0	6.72225	5.10455	SMARCA2	4.53456	6.72225
23.9969	24.1357	24.1853	31.2714	29.9502	31.2003			+	SS18-SSX2_GFP	32	42856000000	3.9936	0	6.7013	4.6773	SMARCD1	3.9936	6.7013
22.5761	22.9786	22.6014	28.7964	29.6375	29.7015			+	SS18-SSX2_GFP	11	10246000000	4.50533	0	6.65978	5.04783	SFXN1	4.50533	6.65978
24.1057	24.9707	24.2374	31.1248	30.8472	31.1976			+	SS18-SSX2_GFP	22	36773000000	4.66386	0	6.61864	5.13272	SMARCE1	4.66386	6.61864
22.5158	22.1066	22.8388	29.0828	28.9539	29.1824			+	SS18-SSX2_GFP	6	9630200000	5.11464	0	6.58598	5.38976	GERRYSSX2	5.11464	6.58598
24.3088	23.6126	23.2771	30.1595	30.0781	30.1881			+	SS18-SSX2_GFP	27	23276000000	4.51486	0	6.40908	4.90884	SMARCD2	4.51486	6.40908
22.1706	23.5907	26.3852	30.4164	30.3297	30.3624			+	SS18-SSX2_GFP	45	26335000000	2.15731	0	6.32068	2.82389	ARID1B	2.15731	6.32068
22.8069	22.349	22.1864	28.6048	28.6035	28.5168			+	SS18-SSX2_GFP	21	6333200000	5.27678	0	6.12757	5.15774	NNT	5.27678	6.12757
26.9342	27.523	26.8321	32.8719	32.8112	32.9183			+	SS18-SSX2_GFP	56	156920000000	4.92074	0	5.77071	4.73966	SMARCC1	4.92074	5.77071
22.6446	25.1252	23.7263	28.9379	30.7927	28.8149			+	SS18-SSX2_GFP	20	24832000000	2.38673	0	5.68309	2.89705	SMARCB1	2.38673	5.68309
23.4979	22.5593	22.6268	28.4037	28.5483	28.4503			+	SS18-SSX2_GFP	5	5926100000	4.27615	0	5.57277	4.26951	TMED10	4.27615	5.57277
22.4656	23.9443	22.6257	28.635	28.5824	28.3541			+	SS18-SSX2_GFP	12	6227300000	3.49667	0	5.51197	3.73349	SLC25A11	3.49667	5.51197
25.6069	25.8502	25.7875	31.1273	31.1455	31.0866			+	SS18-SSX2_GFP	20	46557000000	6.64334	0	5.37158	4.99698	ACTL6A	6.64334	5.37158
21.7844	23.1161	23.7167	28.2447	28.124	28.165			+	SS18-SSX2_GFP	22	4703500000	3.1239	0	5.30548	3.37485	SMARCD3	3.1239	5.30548
22.9821	21.2175	21.8498	27.0884	27.2664	27.1182			+	SS18-SSX2_GFP	4	3769800000	3.23409	0	5.1412	3.3844	RAB1B	3.23409	5.1412
24.0197	24.2198	24.0029	29.5979	28.2128	29.707			+	SS18-SSX2_GFP	16	13746000000	3.32898	0	5.09179	3.42669	AGK	3.32898	5.09179
23.4701	27.7841	22.3427	29.1559	29.0862	30.5513			+	SS18-SSX2_GFP	33	22230000000	1.3709	0.000362205	5.06552	1.85859	ACTB	1.3709	5.06552
21.0313	22.6324	23.169	27.1855	27.4915	27.2113			+	SS18-SSX2_GFP	12	2630900000	2.82077	0	5.01853	3.0424	SLC25A24	2.82077	5.01853
23.3148	23.3672	24.0282	28.6883	28.4005	28.4899			+	SS18-SSX2_GFP	5	6893200000	4.45418	0	4.95619	3.98149	BANF1	4.45418	4.95619
25.8408	25.3999	24.9695	30.2347	30.2667	30.2977			+	SS18-SSX2_GFP	33	25908000000	4.37038	0	4.86296	3.8836	PLS3	4.37038	4.86296
24.7432	21.0115	22.7211	27.6668	27.6622	27.6612			+	SS18-SSX2_GFP	6	4165300000	1.96097	0.000585987	4.83814	2.32768	TOMM22	1.96097	4.83814
24.9187	25.5044	24.8521	29.9276	29.8939	29.7523			+	SS18-SSX2_GFP	19	15823000000	4.61804	0	4.76621	3.92578	UQCRC1	4.61804	4.76621
23.1977	22.7808	22.467	27.5381	27.6317	27.4432			+	SS18-SSX2_GFP	8	3058500000	4.5668	0	4.72253	3.87565	CANX	4.5668	4.72253
21.8847	23.2032	23.7066	27.7944	27.4875	27.6202			+	SS18-SSX2_GFP	4	3147400000	2.98698	0	4.70249	3.033	ATP5J	2.98698	4.70249
24.5167	22.4873	24.3483	28.442	28.6672	28.3454			+	SS18-SSX2_GFP	4	6579300000	2.69436	0	4.70077	2.83661	ATP5J2-PTCD1	2.69436	4.70077
21.7047	22.993	22.9771	27.2743	27.2299	27.016			+	SS18-SSX2_GFP	4	2198900000	3.35306	0	4.61511	3.21792	ATP5I	3.35306	4.61511
22.0367	21.8581	22.8773	26.5958	27.0647	26.7791			+	SS18-SSX2_GFP	4	3740700000	3.73328	0	4.55578	3.39332	ALG6	3.73328	4.55578
22.735	22.8386	22.8929	27.1929	27.5014	27.3707			+	SS18-SSX2_GFP	4	2791300000	5.83667	0	4.53285	4.11815	NDUFV2	5.83667	4.53285
23.859	22.898	22.5937	27.5743	27.7048	27.4709			+	SS18-SSX2_GFP	12	2855200000	3.4912	0	4.46646	3.21965	TOMM70	3.4912	4.46646
23.9889	23.23	23.1621	28.6075	27.2503	27.9018			+	SS18-SSX2_GFP	3	4716500000	3.15115	0	4.45954	3.02734	BCL7A	3.15115	4.45954
23.1869	23.089	24.5346	28.0405	28.1515	27.856			+	SS18-SSX2_GFP	20	4460900000	3.12916	0	4.41248	2.99296	EMC1	3.12916	4.41248
23.1088	22.577	22.865	27.2455	27.3882	27.1397			+	SS18-SSX2_GFP	15	2808700000	4.88405	0	4.40758	3.76808	DYNC1H1	4.88405	4.40758
22.6979	22.8216	22.9191	27.2609	27.1944	27.1563			+	SS18-SSX2_GFP	20	2801200000	6.38961	0	4.39102	4.1002	AFDN	6.38961	4.39102
25.225	24.7012	23.9249	29.0074	29.1902	28.7876			+	SS18-SSX2_GFP	24	9053000000	3.4229	0	4.37803	3.13791	SLC25A13	3.4229	4.37803
23.1516	23.124	22.3225	27.1282	27.2782	27.1908			+	SS18-SSX2_GFP	3	2854900000	4.02121	0	4.33305	3.39759	NDUFS4	4.02121	4.33305
22.0758	23.1122	22.2292	26.5625	26.7545	26.5128			+	SS18-SSX2_GFP	8	1463200000	3.62651	0	4.13755	3.10801	GLG1	3.62651	4.13755
21.9047	21.8053	22.5738	26.4047	26.1704	26.099			+	SS18-SSX2_GFP	6	1761500000	4.04803	0	4.13011	3.28213	KARS	4.04803	4.13011
22.6305	22.3601	22.5495	26.5919	26.7428	26.5568			+	SS18-SSX2_GFP	5	1538200000	5.71051	0	4.11713	3.74841	CYB5R3	5.71051	4.11713
23.2548	23.3894	22.8845	27.0856	27.4681	27.2722			+	SS18-SSX2_GFP	5	2681600000	4.59092	0	4.09907	3.4532	SEC11A	4.59092	4.09907
24.1057	23.8318	23.9447	28.0248	28.0491	27.986			+	SS18-SSX2_GFP	3	4099100000	6.01101	0	4.05922	3.75313	UQCR10	6.01101	4.05922
23.1849	22.51	22.1883	26.9168	26.6197	26.5005			+	SS18-SSX2_GFP	4	1901000000	3.65645	0	4.0513	3.07221	NDUFAB1	3.65645	4.0513
27.7489	27.2733	27.8547	31.6409	31.7567	31.5931			+	SS18-SSX2_GFP	21	57157000000	4.58117	0	4.0379	3.40669	PHB	4.58117	4.0379
27.8539	27.0667	27.5883	31.5448	31.4996	31.5042			+	SS18-SSX2_GFP	18	46783000000	4.18608	0	4.01324	3.25842	PHB2	4.18608	4.01324
23.0842	22.7687	23.0984	26.9821	27.098	26.8066			+	SS18-SSX2_GFP	4	1918500000	5.07797	0	3.97847	3.49927	SPCS3	5.07797	3.97847
22.9283	21.6419	23.5626	26.6664	26.4701	26.6249			+	SS18-SSX2_GFP	4	1556400000	2.61732	0	3.8762	2.47179	COX15	2.61732	3.8762
22.026	22.6795	22.5743	26.114	26.5314	26.2302			+	SS18-SSX2_GFP	3	1257500000	4.0772	0	3.86528	3.12291	NDUFA11	4.0772	3.86528
22.4873	21.9682	23.35	26.7979	26.1989	26.1497			+	SS18-SSX2_GFP	9	1516400000	2.94562	0	3.78028	2.60053	ADD3	2.94562	3.78028
25.4457	22.1944	26.1307	28.3791	28.3883	28.3103			+	SS18-SSX2_GFP	10	5604800000	1.44254	0.000306667	3.76895	1.70202	UQCRFS1	1.44254	3.76895
23.0823	20.6675	22.8138	26.1566	25.8193	25.8408			+	SS18-SSX2_GFP	19	1097600000	2.08189	0.000462312	3.75104	2.11698	SMARCB1	2.08189	3.75104
28.9078	28.7442	28.7628	32.6048	32.4705	32.4397			+	SS18-SSX2_GFP	24	92932000000	6.05644	0	3.70004	3.45019	ATP5B	6.05644	3.70004
26.3401	25.6801	24.4162	29.2926	29.1254	29.1177			+	SS18-SSX2_GFP	15	10044000000	2.54447	0.000613333	3.69974	2.36058	RPN2	2.54447	3.69974
21.9557	23.2921	23.1144	26.5862	26.4274	26.3689			+	SS18-SSX2_GFP	7	1533800000	3.01027	0	3.67347	2.57966	ADD1	3.01027	3.67347
25.3415	24.6745	21.7319	27.8329	27.3782	27.5557			+	SS18-SSX2_GFP	9	3459500000	1.51936	0.000313993	3.67298	1.7352	RHOA	1.51936	3.67298
23.4551	23.111	22.8016	26.8534	26.8399	26.6811			+	SS18-SSX2_GFP	5	1703400000	4.31325	0	3.66892	3.06592	ATAD1	4.31325	3.66892
22.1189	22.2975	23.4385	26.1885	26.4114	26.1882			+	SS18-SSX2_GFP	7	1236000000	3.01304	0	3.64439	2.56655	MLEC	3.01304	3.64439
24.5614	25.092	24.5647	28.4366	28.3803	28.3337			+	SS18-SSX2_GFP	8	5118600000	4.46546	0	3.64413	3.09133	ATP5H	4.46546	3.64413
22.0379	23.22	22.8952	26.8033	26.1891	26.0007			+	SS18-SSX2_GFP	3	1852500000	2.96795	0	3.61333	2.53065	MGST3	2.96795	3.61333
23.4512	22.7581	22.2406	26.6054	26.2006	26.4827			+	SS18-SSX2_GFP	164	1323300000	3.20746	0	3.61294	2.63599	SPTAN1	3.20746	3.61294
21.8845	22.5194	22.522	26.0807	25.6791	25.9289			+	SS18-SSX2_GFP	9	1378000000	3.91723	0	3.58761	2.88803	UBP1	3.91723	3.58761
22.3076	25.3698	23.2977	27.0434	27.1518	27.4204			+	SS18-SSX2_GFP	11	2552300000	1.75644	0.000360784	3.54681	1.85783	STT3B	1.75644	3.54681
23.6474	21.9893	22.3111	26.2612	26.257	26.0555			+	SS18-SSX2_GFP	3	1223900000	2.63948	0.000597403	3.54197	2.34235	FAM101B	2.63948	3.54197
25.4135	25.1946	20.8552	27.9478	26.8745	27.2502			+	SS18-SSX2_GFP	5	3269700000	1.09596	0.000222222	3.53641	1.40489	UQCRB	1.09596	3.53641
22.7838	22.1286	22.2024	26.0391	25.6582	25.8947			+	SS18-SSX2_GFP	5	1018000000	3.92261	0	3.49239	2.82771	SEC63	3.92261	3.49239
21.8367	22.0651	22.918	25.8755	25.7168	25.5974			+	SS18-SSX2_GFP	5	1014900000	3.28425	0	3.45658	2.58196	EIF3D	3.28425	3.45658
22.6892	22.009	21.0611	25.4016	25.21	25.4402			+	SS18-SSX2_GFP	2	702220000	2.7018	0.000578616	3.43083	2.32212	TIMM23B	2.7018	3.43083
22.7246	21.9093	23.218	26.1945	26.1851	25.7373			+	SS18-SSX2_GFP	2	1333400000	2.94682	0	3.42166	2.42615	NPM3	2.94682	3.42166
25.4201	25.3064	25.0501	28.712	28.8549	28.4553			+	SS18-SSX2_GFP	10	6764800000	4.54392	0	3.41519	2.94379	DDOST	4.54392	3.41519
22.1557	20.6636	22.6509	25.2795	24.9715	25.3929			+	SS18-SSX2_GFP	5	661690000	2.28923	0.000453202	3.39123	2.10582	VAPB	2.28923	3.39123
22.2321	23.2852	21.1292	25.6266	25.6426	25.5502			+	SS18-SSX2_GFP	7	838500000	2.25687	0.000444444	3.39095	2.0892	LARP1	2.25687	3.39095
23.2259	22.8038	22.4592	26.2313	26.3091	26.1124			+	SS18-SSX2_GFP	2	1285200000	3.91577	0	3.38799	2.75682	SSR3	3.91577	3.38799
22.2113	23.4003	25.3488	27.1492	26.8108	27.1299			+	SS18-SSX2_GFP	4	2446100000	1.66817	0.000319444	3.37648	1.7576	NDUFB4	1.66817	3.37648
22.6288	20.9711	22.6828	25.1939	25.5358	25.6479			+	SS18-SSX2_GFP	3	655720000	2.36262	0.000467005	3.36495	2.13223	DAD1	2.36262	3.36495
25.9512	25.1515	25.4148	29.1662	28.504	28.8553			+	SS18-SSX2_GFP	9	7152400000	3.41115	0	3.33599	2.55977	ATP5F1	3.41115	3.33599
22.7306	22.3837	22.756	25.9329	26.0122	25.9315			+	SS18-SSX2_GFP	8	1152400000	4.95884	0	3.33544	2.97013	CCAR2	4.95884	3.33544
27.9196	27.5614	26.8663	30.8416	30.7032	30.766			+	SS18-SSX2_GFP	97	30226000000	3.35677	0	3.32116	2.53182	FLNB	3.35677	3.32116
22.2855	23.468	20.5943	25.2088	25.6092	25.4523			+	SS18-SSX2_GFP	9	853540000	1.7663	0.00033213	3.30751	1.79563	AFG3L2	1.7663	3.30751
25.9581	25.8477	25.9107	29.1841	29.3324	29.0984			+	SS18-SSX2_GFP	15	10936000000	5.7868	0	3.29948	3.06804	NDUFA9	5.7868	3.29948
22.5948	22.4024	25.0124	26.553	26.6746	26.6462			+	SS18-SSX2_GFP	2	1636000000	1.76023	0.000328571	3.28808	1.78644	MP68	1.76023	3.28808
23.3984	22.6226	21.9621	25.7812	26.1474	25.8951			+	SS18-SSX2_GFP	2	1268800000	2.80378	0.000557576	3.28017	2.29552	CDIPT	2.80378	3.28017
22.3286	22.0938	21.3531	24.9071	25.3935	25.297			+	SS18-SSX2_GFP	5	715860000	3.23991	0	3.27402	2.46274	KPNA6	3.23991	3.27402
25.3832	25.4228	25.5934	28.7248	28.7684	28.7002			+	SS18-SSX2_GFP	2	7009800000	5.96112	0	3.26465	3.05821	COX7A2	5.96112	3.26465
23.6035	22.1756	23.4434	26.4514	26.2113	26.343			+	SS18-SSX2_GFP	4	1326900000	2.69059	0.000525714	3.26103	2.23825	FAM162A	2.69059	3.26103
22.9305	23.2193	22.6472	26.0949	26.0687	25.9611			+	SS18-SSX2_GFP	13	1971000000	4.27787	0	3.10926	2.65717	GLTSCR1	4.27787	3.10926
23.5375	24.2797	24.1968	27.0711	27.214	27.0359			+	SS18-SSX2_GFP	5	2314300000	3.67763	0	3.10232	2.49981	ATP1B3	3.67763	3.10232
22.3926	23.3604	22.9076	25.9092	26.0964	25.9038			+	SS18-SSX2_GFP	14	1066200000	3.3731	0	3.08297	2.39617	UTRN	3.3731	3.08297
27.6328	26.4766	26.7615	30.2606	30.0002	29.8501			+	SS18-SSX2_GFP	79	18206000000	2.95348	0.000534884	3.07999	2.25167	SPTBN2	2.95348	3.07999
23.9948	23.4566	23.0032	26.5733	26.6244	26.48			+	SS18-SSX2_GFP	6	1448000000	3.35039	0	3.07433	2.38377	ABLIM1	3.35039	3.07433
25.9555	26.5227	26.5114	29.5102	29.3014	29.3659			+	SS18-SSX2_GFP	23	12147000000	3.99934	0	3.06262	2.55836	NDUFS1	3.99934	3.06262
25.2498	25.3967	22.4582	27.4654	27.3689	27.4048			+	SS18-SSX2_GFP	4	2687500000	1.47602	0.000265896	3.04481	1.55634	PGRMC1	1.47602	3.04481
22.9946	21.8031	22.6884	25.4947	25.6089	25.4886			+	SS18-SSX2_GFP	3	945300000	2.968	0.000522727	3.03536	2.23289	EIF3F	2.968	3.03536
22.863	22.1797	23.626	25.8914	25.9815	25.8784			+	SS18-SSX2_GFP	6	1274100000	2.71091	0.000469388	3.02754	2.13359	TERF2	2.71091	3.02754
25.8841	25.7739	26.0297	28.2441	29.3228	29.1668			+	SS18-SSX2_GFP	4	10131000000	3.02661	0.000528736	3.01537	2.24249	MT-CO2	3.02661	3.01537
23.0973	24.6487	24.0649	26.8132	27.0833	26.9549			+	SS18-SSX2_GFP	3	2250000000	2.55503	0.000433962	3.01356	2.0654	NDUFB1	2.55503	3.01356
22.8223	23.0676	22.862	26.0322	25.9439	25.8091			+	SS18-SSX2_GFP	9	1003100000	5.14123	0	3.01109	2.73754	NSF	5.14123	3.01109
26.0107	26.2907	26.1935	29.254	29.172	29.0936			+	SS18-SSX2_GFP	7	10382000000	5.24126	0	3.00821	2.74917	CYC1	5.24126	3.00821
23.4965	23.0541	21.9657	25.9949	25.9215	25.5817			+	SS18-SSX2_GFP	3	970510000	2.49872	0.000427907	2.99394	2.03349	TMED9	2.49872	2.99394
23.802	23.5327	21.8928	26.088	26.255	25.8439			+	SS18-SSX2_GFP	3	1030100000	2.09713	0.000359375	2.98647	1.85674	ZMPSTE24	2.09713	2.98647
22.2535	22.5079	21.965	25.2126	25.3207	25.098			+	SS18-SSX2_GFP	6	830740000	4.20466	0	2.96828	2.53809	NUP85	4.20466	2.96828
21.7092	23.097	23.2642	25.5518	25.7024	25.7116			+	SS18-SSX2_GFP	8	932640000	2.40655	0.000396552	2.96519	1.98268	EDC4	2.40655	2.96519
22.0121	21.6758	24.5505	25.8714	25.504	25.7467			+	SS18-SSX2_GFP	3	983350000	1.49958	0.000264368	2.96123	1.54733	LAMTOR2	1.49958	2.96123
22.7354	21.9555	22.1411	25.2518	25.157	25.2324			+	SS18-SSX2_GFP	3	629360000	3.61294	0.000621622	2.93641	2.37387	MT-ND5	3.61294	2.93641
25.0144	22.1695	23.1937	26.2812	26.0257	26.8729			+	SS18-SSX2_GFP	4	1415400000	1.55482	0.00027381	2.93407	1.56991	NDUFS5	1.55482	2.93407
22.9058	24.0772	22.5868	26.1602	26.1687	26.0356			+	SS18-SSX2_GFP	6	1225400000	2.52446	0.000418182	2.93155	2.01464	OCIAD1	2.52446	2.93155
21.3909	22.4645	22.4308	25.0991	25.2101	24.7681			+	SS18-SSX2_GFP	8	693300000	2.83259	0.000464646	2.93038	2.12878	SMCHD1	2.83259	2.93038
23.1452	22.4814	22.3351	25.3752	25.5859	25.763			+	SS18-SSX2_GFP	2	718080000	3.36233	0.000554217	2.92081	2.29392	NDUFB11	3.36233	2.92081
24.3952	24.2555	24.419	27.1564	27.4532	27.1562			+	SS18-SSX2_GFP	12	3433700000	4.88857	0	2.89869	2.60832	OSBPL8	4.88857	2.89869
22.3323	22.9804	22.8643	25.7949	25.5294	25.4721			+	SS18-SSX2_GFP	2	1047300000	3.67984	0.000605263	2.87313	2.34939	0	3.67984	2.87313
22.9453	21.786	22.8071	25.3658	25.3844	25.3899			+	SS18-SSX2_GFP	3	736630000	2.84502	0.00045098	2.86722	2.0995	YAP1	2.84502	2.86722
21.7261	23.3242	24.5637	26.1036	26.168	25.9431			+	SS18-SSX2_GFP	10	1181100000	1.59563	0.000275449	2.86691	1.57174	EXOSC10	1.59563	2.86691
24.0555	23.945	22.5791	26.5354	26.5261	26.1063			+	SS18-SSX2_GFP	4	1433500000	2.3511	0.000380165	2.86273	1.91431	TOMM40	2.3511	2.86273
22.5287	27.3799	26.804	28.4848	28.4259	28.3853			+	SS18-SSX2_GFP	2	6170800000	0.869963	0.00187978	2.8611	1.13069	RPLP1	0.869963	2.8611
22.335	22.8611	23.0432	25.2788	25.9729	25.5314			+	SS18-SSX2_GFP	10	1196200000	3.1988	0.000502732	2.84793	2.20146	ZMYM3	3.1988	2.84793
23.6533	22.3092	22.4041	25.6697	25.7891	25.4422			+	SS18-SSX2_GFP	4	849930000	2.51277	0.000391489	2.8448	1.96888	UBAP2L	2.51277	2.8448
24.9811	25.2661	25.2491	27.7582	28.156	28.1011			+	SS18-SSX2_GFP	8	3820500000	4.28288	0	2.83971	2.45875	UQCRQ	4.28288	2.83971
26.8059	26.5466	26.9074	29.5848	29.6382	29.5094			+	SS18-SSX2_GFP	39	16176000000	4.80657	0	2.82419	2.53579	ACTN4	4.80657	2.82419
25.6927	25.5636	26.2217	28.536	28.7062	28.6944			+	SS18-SSX2_GFP	16	6669600000	3.76034	0.000589744	2.81953	2.33274	SLC3A2	3.76034	2.81953
23.422	22.7696	22.4807	25.5283	25.7238	25.8742			+	SS18-SSX2_GFP	3	945560000	3.16858	0.000484211	2.81805	2.17466	NHP2	3.16858	2.81805
25.5794	25.6844	25.2678	28.3757	28.5095	28.0951			+	SS18-SSX2_GFP	19	5653000000	4.06125	0	2.81619	2.39713	HADHA	4.06125	2.81619
24.5827	24.7918	22.5871	26.7524	26.8819	26.7617			+	SS18-SSX2_GFP	6	1981800000	1.79021	0.000297735	2.81145	1.65	NDUFB5	1.79021	2.81145
23.0269	21.7153	24.6373	26.5113	25.6141	25.6691			+	SS18-SSX2_GFP	2	859890000	1.45759	0.000243386	2.80501	1.48141	TIMM10	1.45759	2.80501
22.7219	21.4129	22.3638	24.9774	25.0014	24.9288			+	SS18-SSX2_GFP	5	496840000	2.69728	0.000420091	2.80294	2.01482	LEMD2	2.69728	2.80294
23.6362	22.6447	26.1488	26.9455	26.8496	27.0405			+	SS18-SSX2_GFP	12	3014100000	1.25923	0.000212963	2.80194	1.37061	RBBP4	1.25923	2.80194
22.9669	23.4083	23.6984	26.3188	26.025	26.1302			+	SS18-SSX2_GFP	2	1102600000	3.58755	0.000547619	2.80014	2.27769	USMG5	3.58755	2.80014
22.8253	22.6811	22.3018	25.3361	25.4846	25.37			+	SS18-SSX2_GFP	3	784180000	4.17353	0	2.79415	2.40364	SYNJ2BP	4.17353	2.79415
21.732	22.6128	22.2653	24.9719	25.0356	24.9616			+	SS18-SSX2_GFP	3	783300000	3.38522	0.000513966	2.78629	2.21629	POLR2C	3.38522	2.78629
26.3111	26.3583	26.7529	29.3625	29.2287	29.1889			+	SS18-SSX2_GFP	5	11882000000	4.31046	0	2.78592	2.42341	C1QBP	4.31046	2.78592
22.9263	23.4538	22.2667	25.5469	25.7427	25.6918			+	SS18-SSX2_GFP	4	988390000	2.87296	0.000431925	2.77821	2.06043	LAMTOR3	2.87296	2.77821
24.4956	22.3392	24.4449	26.4521	26.5856	26.5678			+	SS18-SSX2_GFP	9	1944400000	1.7557	0.000291139	2.7753	1.62134	HNRNPUL1	1.7557	2.7753
26.0558	25.5453	26.1156	28.6861	28.6955	28.6437			+	SS18-SSX2_GFP	5	6920900000	3.96674	0.000601307	2.76953	2.34375	COX5B	3.96674	2.76953
22.1349	22.9735	23.4372	25.6605	25.6007	25.5687			+	SS18-SSX2_GFP	6	902490000	2.71147	0.000408889	2.76142	1.99809	KRI1	2.71147	2.76142
22.8654	22.4177	24.9417	26.1294	26.2892	26.084			+	SS18-SSX2_GFP	10	1404400000	1.61851	0.00026513	2.75926	1.55011	RBM4	1.61851	2.75926
21.0756	22.9549	23.3923	25.3042	25.1707	25.2248			+	SS18-SSX2_GFP	2	735800000	1.74734	0.000285714	2.75899	1.61185	RSRC1	1.74734	2.75899
23.0303	23.38	22.6445	25.6809	25.7539	25.8941			+	SS18-SSX2_GFP	3	795520000	3.62187	0.000538012	2.75803	2.25806	SLC7A1	3.62187	2.75803
22.6302	22.4386	22.5613	25.6539	25.1227	25.1175			+	SS18-SSX2_GFP	3	710130000	3.91197	0.000575	2.75469	2.32157	NDUFB6	3.91197	2.75469
22.5905	22.3789	22.7173	25.305	25.3926	25.2506			+	SS18-SSX2_GFP	4	720640000	4.86789	0	2.75385	2.48759	EXOSC7	4.86789	2.75385
25.8218	21.7029	23.0468	26.4	26.2874	26.1347			+	SS18-SSX2_GFP	11	1425200000	1.06364	0.000852459	2.75017	1.24153	RANGAP1	1.06364	2.75017
22.8507	23.6019	23.0928	25.7649	26.1325	25.8948			+	SS18-SSX2_GFP	2	846590000	3.43645	0.000508287	2.74894	2.20591	RMDN3	3.43645	2.74894
22.6144	22.5934	23.1999	25.5068	25.6971	25.4003			+	SS18-SSX2_GFP	7	961850000	3.64087	0.000531792	2.73218	2.24519	RPA1	3.64087	2.73218
23.3816	23.0127	21.709	25.6073	25.2522	25.4328			+	SS18-SSX2_GFP	7	820080000	2.20788	0.000335766	2.72969	1.7987	WDR82	2.20788	2.72969
25.9128	25.9671	25.5821	28.4199	28.6967	28.5209			+	SS18-SSX2_GFP	10	6277400000	4.32661	0.000634483	2.72515	2.38013	ATP5C1	4.32661	2.72515
24.1962	22.6014	23.1329	25.666	26.3541	26.0446			+	SS18-SSX2_GFP	3	1251400000	2.22248	0.000334545	2.71135	1.79641	PDCD6	2.22248	2.71135
24.2381	22.9636	22.8695	26.1696	26.1273	25.8782			+	SS18-SSX2_GFP	14	1371400000	2.40952	0.000365079	2.70132	1.8622	AP2A2	2.40952	2.70132
21.6389	22.7902	22.4855	24.951	24.9522	25.078			+	SS18-SSX2_GFP	5	538890000	2.82565	0.000405286	2.68887	1.99622	FAR1	2.82565	2.68887
23.1866	22.6921	22.7074	25.5134	25.5294	25.5872			+	SS18-SSX2_GFP	3	678830000	4.08792	0.000567901	2.68132	2.30378	MGST1	4.08792	2.68132
23.5883	22.7372	22.8262	25.797	25.6989	25.6686			+	SS18-SSX2_GFP	8	903790000	3.21446	0.00044878	2.67095	2.09841	NUP153	3.21446	2.67095
22.6196	25.9234	23.7385	26.8169	26.757	26.7167			+	SS18-SSX2_GFP	8	2192000000	1.28953	0.000209567	2.66969	1.35478	PPP1R9B	1.28953	2.66969
25.6469	25.3791	25.3981	28.6186	27.697	28.102			+	SS18-SSX2_GFP	2	4917500000	3.16512	0.000442308	2.66449	2.08112	COX6A1	3.16512	2.66449
24.3334	23.7177	23.9315	26.3751	26.8178	26.7623			+	SS18-SSX2_GFP	7	1613500000	3.50927	0.000479167	2.65752	2.16416	SPCS2	3.50927	2.65752
21.8697	23.3265	22.19	24.9061	25.309	25.1201			+	SS18-SSX2_GFP	3	521900000	2.35633	0.000345865	2.64966	1.81851	SEC22B	2.35633	2.64966
25.4508	25.9638	25.1529	28.5951	27.8427	28.0686			+	SS18-SSX2_GFP	13	5370600000	2.90616	0.00040708	2.64625	1.99683	NDUFV1	2.90616	2.64625
21.7949	22.8852	21.9622	24.7981	24.8365	24.9235			+	SS18-SSX2_GFP	3	485690000	2.823	0.000388186	2.63865	1.96761	OXA1L	2.823	2.63865
23.4266	22.8323	23.3063	25.7365	26.0416	25.7017			+	SS18-SSX2_GFP	8	1292600000	3.62745	0.000486772	2.63817	2.17833	VRK3	3.62745	2.63817
22.4354	23.7692	22.7974	25.4217	25.928	25.5295			+	SS18-SSX2_GFP	2	977860000	2.45026	0.000351145	2.6257	1.84008	TOMM6	2.45026	2.6257
23.3571	22.2701	23.3731	25.4826	25.7078	25.6575			+	SS18-SSX2_GFP	3	822220000	2.66944	0.00037551	2.61589	1.90754	RAP2A	2.66944	2.61589
21.6714	23.036	22.6602	25.0271	25.1692	25.0148			+	SS18-SSX2_GFP	1	688270000	2.50846	0.000357977	2.61449	1.8543	MT-ND1	2.50846	2.61449
22.6676	22.5299	22.4462	25.3243	25.1493	25.0098			+	SS18-SSX2_GFP	4	633790000	4.70602	0.000609272	2.61322	2.35098	SPECC1L	4.70602	2.61322
24.557	24.8356	25.2992	27.6442	27.3502	27.4897			+	SS18-SSX2_GFP	5	2807900000	3.43701	0.000455446	2.59742	2.1074	BSG	3.43701	2.59742
24.5874	21.7266	22.976	25.8137	25.6855	25.5784			+	SS18-SSX2_GFP	4	1134900000	1.45131	0.000224939	2.59588	1.41787	AP2S1	1.45131	2.59588
25.0154	24.84	24.4068	27.3986	26.9474	27.6611			+	SS18-SSX2_GFP	18	3593400000	3.13847	0.000423963	2.58163	2.0233	KTN1	3.13847	2.58163
23.5964	23.9029	24.2549	26.5323	26.4648	26.4843			+	SS18-SSX2_GFP	27	5459100000	3.75428	0.000474227	2.5757	2.16208	ADNP	3.75428	2.5757
30.8602	30.9334	30.9198	33.5468	33.3957	33.4924			+	SS18-SSX2_GFP	149	212870000000	6.08407	0	2.57388	2.4523	SPTBN1	6.08407	2.57388
25.6323	22.6269	25.5408	26.8179	27.4518	27.2394			+	SS18-SSX2_GFP	11	2438200000	1.20252	0.000644068	2.56968	1.28207	NDUFA12	1.20252	2.56968
22.8967	23.7664	23.1757	25.563	26.1317	25.849			+	SS18-SSX2_GFP	5	993130000	2.96595	0.000389831	2.5683	1.96886	TIMMDC1	2.96595	2.5683
22.3622	22.2704	22.7189	24.8899	24.9493	25.205			+	SS18-SSX2_GFP	3	607820000	3.97397	0.000497297	2.56425	2.19637	NDUFS6	3.97397	2.56425
22.5153	21.5212	22.6243	24.9425	24.7538	24.6193			+	SS18-SSX2_GFP	2	440810000	2.66476	0.000366534	2.55157	1.87168	C19orf52	2.66476	2.55157
24.1057	24.4177	24.5385	26.8552	27.0397	26.8203			+	SS18-SSX2_GFP	6	1834800000	4.2029	0.000516854	2.55109	2.22644	TMEM33	4.2029	2.55109
23.4274	23.4027	23.227	25.7917	26.1061	25.8047			+	SS18-SSX2_GFP	5	1311000000	4.52907	0.000544379	2.54842	2.2743	NOL6	4.52907	2.54842
25.3121	24.9216	22.2431	26.5707	26.7011	26.8274			+	SS18-SSX2_GFP	9	1703800000	1.23358	0.000650964	2.54079	1.29146	HADHB	1.23358	2.54079
23.8651	23.4324	23.6835	25.8749	26.5011	26.2228			+	SS18-SSX2_GFP	3	1503900000	3.48965	0.000440191	2.53928	2.08076	MT-ND4	3.48965	2.53928
21.574	22.8557	22.5805	24.7009	24.8924	25.028			+	SS18-SSX2_GFP	4	447820000	2.49591	0.000343284	2.53704	1.81096	NAPA	2.49591	2.53704
22.6959	24.0046	22.1648	25.6937	25.496	25.2575			+	SS18-SSX2_GFP	5	849380000	1.96724	0.000289308	2.5273	1.61899	EEF1D	1.96724	2.5273
29.5434	29.3024	29.2794	31.9093	31.9263	31.8572			+	SS18-SSX2_GFP	28	60547000000	5.07524	0.000571429	2.52253	2.32071	ATP5A1	5.07524	2.52253
21.7725	22.6181	22.2192	24.6705	24.5813	24.8845			+	SS18-SSX2_GFP	5	458850000	3.18856	0.0004	2.50883	1.9907	WDR18	3.18856	2.50883
28.0569	27.7795	27.7853	30.417	30.3853	30.333			+	SS18-SSX2_GFP	29	24032000000	4.91482	0.000550898	2.50457	2.28782	RPN1	4.91482	2.50457
22.6892	23.1168	22.7827	25.419	25.3547	25.3208			+	SS18-SSX2_GFP	13	853830000	4.32828	0.000511111	2.50192	2.20832	SLC25A12	4.32828	2.50192
24.8708	24.8639	24.748	27.1985	27.521	27.2054			+	SS18-SSX2_GFP	3	3008200000	4.58447	0.000519774	2.48071	2.22762	SSR1	4.58447	2.48071
23.8752	25.0804	22.9456	26.2572	26.7887	26.2871			+	SS18-SSX2_GFP	13	2309800000	1.74164	0.000252747	2.47723	1.50906	MTA1	1.74164	2.47723
21.4986	24.7094	23.3352	25.6151	25.4833	25.8497			+	SS18-SSX2_GFP	12	990940000	1.2381	0.000875789	2.46829	1.27479	HIP1	1.2381	2.46829
22.5449	22.0657	22.2708	24.9264	24.9484	24.4078			+	SS18-SSX2_GFP	3	542360000	3.40813	0.00041629	2.46707	2.0145	RBM5	3.40813	2.46707
25.7907	25.3193	25.7144	28.0118	28.1553	27.9847			+	SS18-SSX2_GFP	7	5342000000	4.01911	0.00046	2.4425	2.114	NDUFA13	4.01911	2.4425
26.2652	26.188	26.1178	28.4826	28.8262	28.5522			+	SS18-SSX2_GFP	9	6939400000	4.5553	0.000491979	2.43002	2.18293	MTCH2	4.5553	2.43002
26.2994	26.1912	25.9246	26.7675	26.4758	26.4416					14	3381200000	1.30493	0.370179	0.423242	0.367411	BRD9	2.30493	2.42324
22.9626	23.0267	23.3195	25.4838	25.7222	25.3286			+	SS18-SSX2_GFP	3	723270000	3.95963	0.000438095	2.4086	2.0788	TXNL4A	3.95963	2.4086
22.2824	22.0114	23.2216	24.7656	25.1141	24.8515			+	SS18-SSX2_GFP	7	684330000	2.49067	0.000316151	2.40528	1.74124	KIF4A	2.49067	2.40528
22.7021	22.9174	23.1701	25.3736	25.3946	25.2246			+	SS18-SSX2_GFP	4	611530000	4.10327	0.000446602	2.40106	2.09619	EMC3	4.10327	2.40106
23.1406	22.7946	22.8447	25.3251	25.3476	25.3033			+	SS18-SSX2_GFP	4	719660000	4.60264	0.000476684	2.39873	2.16354	ATP6V0A1	4.60264	2.39873
22.8548	24.4797	22.4858	25.8538	25.6079	25.5527			+	SS18-SSX2_GFP	7	1033500000	1.74541	0.000242105	2.39803	1.4808	NUP210	1.74541	2.39803
22.1737	21.6723	21.1704	23.9424	24.2367	24.0009			+	SS18-SSX2_GFP	4	279250000	2.85185	0.00034981	2.38785	1.83219	CSNK2A2	2.85185	2.38785
22.5428	24.254	23.0769	25.6553	25.8085	25.5644			+	SS18-SSX2_GFP	6	1046100000	2.02203	0.000276276	2.38483	1.57886	CSNK1G3	2.02203	2.38483
22.5808	23.8647	22.6124	25.525	25.351	25.3207			+	SS18-SSX2_GFP	2	692670000	2.29211	0.000299674	2.3796	1.66693	EMC8	2.29211	2.3796
23.2518	23.9817	22.3732	25.3348	25.697	25.6784			+	SS18-SSX2_GFP	4	979750000	2.10582	0.000281346	2.36786	1.60025	MTCH1	2.10582	2.36786
23.3225	25.2346	22.7084	26.4334	25.9775	25.9415			+	SS18-SSX2_GFP	6	1443100000	1.41585	0.00020354	2.36231	1.32942	KPNA3	1.41585	2.36231
22.7785	21.848	23.592	25.0441	25.2555	24.9806			+	SS18-SSX2_GFP	3	533700000	2.0019	0.000266667	2.35394	1.55825	EXOSC5	2.0019	2.35394
22.738	22.6413	22.6411	25.034	25.2794	24.7292			+	SS18-SSX2_GFP	5	544320000	3.87084	0.000414414	2.3407	2.0137	SLC25A20	3.87084	2.3407
24.7811	25.2828	25.537	27.6783	27.4865	27.4576			+	SS18-SSX2_GFP	12	3195000000	3.26061	0.000370968	2.34048	1.8988	CCDC47	3.26061	2.34048
26.6115	26.5646	25.836	28.8931	28.486	28.6409			+	SS18-SSX2_GFP	23	6917300000	2.96153	0.000348485	2.33597	1.82833	CKAP4	2.96153	2.33597
25.0583	24.6544	22.2238	27.2374	25.8214	25.8526			+	SS18-SSX2_GFP	4	1695100000	1.09228	0.00126236	2.32497	1.16203	NDUFB3	1.09228	2.32497
22.7451	22.7986	22.5279	24.992	25.2041	24.801			+	SS18-SSX2_GFP	5	633810000	4.06672	0.000422018	2.30852	2.01997	KIN	4.06672	2.30852
23.004	23.2235	21.8027	25.0364	24.8683	25.0487			+	SS18-SSX2_GFP	3	658060000	2.18036	0.000279635	2.30772	1.59658	CWC27	2.18036	2.30772
25.21	24.1936	24.9481	27.2604	27.0764	26.917			+	SS18-SSX2_GFP	14	2963400000	2.7005	0.000317241	2.30068	1.74237	CEBPZ	2.7005	2.30068
23.0554	23.6772	23.1398	25.4729	25.7087	25.5622			+	SS18-SSX2_GFP	7	1459600000	3.42516	0.000369478	2.29047	1.89846	POGZ	3.42516	2.29047
22.4172	21.4492	22.8544	24.5136	24.4247	24.6417			+	SS18-SSX2_GFP	4	355420000	2.25752	0.00028483	2.28639	1.61019	CAMK2D	2.25752	2.28639
22.4997	22.9963	23.9343	25.3072	25.5482	25.4269			+	SS18-SSX2_GFP	2	695290000	2.23236	0.000283077	2.28401	1.60132	TOR1AIP1	2.23236	2.28401
27.3142	26.9548	26.7724	29.3242	29.3307	29.2292			+	SS18-SSX2_GFP	24	10620000000	3.82554	0.000386555	2.28089	1.96208	ATP1A1	3.82554	2.28089
22.0907	23.7495	23.3691	25.3029	25.4879	25.2446			+	SS18-SSX2_GFP	4	708010000	1.96147	0.000253444	2.27538	1.50981	STXBP3	1.96147	2.27538
22.1794	22.2837	23.9605	24.896	25.2417	25.0821			+	SS18-SSX2_GFP	7	619720000	1.74414	0.000228856	2.26542	1.42867	MACF1	1.74414	2.26542
23.4432	22.6182	22.6021	25.1067	25.2906	25.0617			+	SS18-SSX2_GFP	3	489410000	2.85924	0.000321678	2.2652	1.76087	TM9SF3	2.85924	2.2652
24.2615	23.1011	22.421	25.2517	25.6304	25.6628			+	SS18-SSX2_GFP	5	732940000	1.81873	0.000234097	2.25371	1.45095	RAB11A	1.81873	2.25371
27.2581	27.3437	26.9283	29.487	29.4128	29.3852			+	SS18-SSX2_GFP	27	13096000000	4.18268	0.000403509	2.25166	1.99222	TMPO	4.18268	2.25166
25.2988	25.5832	25.6208	27.7022	27.9094	27.6082			+	SS18-SSX2_GFP	15	3954400000	4.11023	0.00039485	2.23903	1.97258	ATP2A2	4.11023	2.23903
31.5963	31.5377	31.5683	33.8962	33.6958	33.8242			+	SS18-SSX2_GFP	165	260440000000	5.48233	0.000457711	2.23797	2.10932	SPTAN1	5.48233	2.23797
23.7055	23.6596	22.218	25.4066	25.4555	25.3923			+	SS18-SSX2_GFP	5	728260000	1.9822	0.00025	2.22375	1.4937	RAP1B	1.9822	2.22375
25.8988	21.7696	21.7476	25.4163	25.259	25.4101			+	SS18-SSX2_GFP	6	796740000	0.738147	0.00701441	2.2231	0.933661	STRAP	0.738147	2.2231
22.072	23.6774	25.291	25.8366	25.986	25.8866			+	SS18-SSX2_GFP	4	1247200000	1.12375	0.00140561	2.22294	1.15161	LAMTOR5	1.12375	2.22294
26.4974	26.3368	26.3299	28.8492	28.4825	28.4866			+	SS18-SSX2_GFP	6	7097900000	4.11664	0.000383333	2.21808	1.95716	RPL21	4.11664	2.21808
23.5839	24.332	24.0526	26.1039	26.3918	26.0806			+	SS18-SSX2_GFP	7	1371600000	3.10563	0.000325088	2.20257	1.77612	LEMD3	3.10563	2.20257
23.3898	23.4198	22.0066	24.9954	25.2859	25.1349			+	SS18-SSX2_GFP	5	687020000	2.01331	0.000249322	2.20001	1.49291	PPP1R18	2.01331	2.20001
21.4066	22.314	23.1573	24.5629	24.4803	24.4313			+	SS18-SSX2_GFP	2	366550000	1.91091	0.000235897	2.19887	1.45916	CKMT1A	1.91091	2.19887
23.6359	21.5155	22.0693	24.56	24.7771	24.4708			+	SS18-SSX2_GFP	2	456220000	1.57344	0.0002049	2.19573	1.33769	MRPL4	1.57344	2.19573
22.1622	21.9779	23.4694	24.6552	24.8812	24.6602			+	SS18-SSX2_GFP	2	513920000	2.00488	0.000246649	2.19571	1.48825	RP2	2.00488	2.19571
24.8968	25.8915	22.6298	26.9609	26.5011	26.5338			+	SS18-SSX2_GFP	5	2048800000	1.05512	0.00182979	2.19262	1.10938	RALA	1.05512	2.19262
23.7372	22.3876	23.013	25.3273	25.2787	25.102			+	SS18-SSX2_GFP	2	705800000	2.28244	0.000272189	2.19006	1.56891	S100A10	2.28244	2.19006
21.8786	22.6956	23.0452	24.5262	24.9204	24.7415			+	SS18-SSX2_GFP	6	525600000	2.41513	0.000283951	2.18957	1.60531	CNOT1	2.41513	2.18957
22.978	23.7006	22.4386	24.7638	25.4806	25.4098			+	SS18-SSX2_GFP	3	778050000	2.14288	0.000257703	2.17897	1.5228	GPC6	2.14288	2.17897
24.1705	24.9438	24.6864	26.7787	26.9778	26.5723			+	SS18-SSX2_GFP	13	2936800000	2.98045	0.000310811	2.17604	1.73291	MTA2	2.98045	2.17604
25.9723	26.2144	25.827	28.0206	28.2837	28.2249			+	SS18-SSX2_GFP	4	5760900000	4.01769	0.000377049	2.17184	1.90799	SNRPG	4.01769	2.17184
25.9189	25.6317	24.9041	27.5783	27.6339	27.7577			+	SS18-SSX2_GFP	18	3642000000	2.6783	0.000298701	2.17173	1.6621	SKIV2L2	2.6783	2.17173
24.8704	24.8044	22.465	26.3287	26.3059	26.0098			+	SS18-SSX2_GFP	18	1896100000	1.27501	0.00132008	2.16822	1.20612	MDN1	1.27501	2.16822
26.7807	26.2142	26.5763	28.6463	28.7246	28.6918			+	SS18-SSX2_GFP	10	7466800000	3.68721	0.000355212	2.16384	1.85392	HACD3	3.68721	2.16384
22.7244	25.7777	24.6686	26.5286	26.5833	26.5182			+	SS18-SSX2_GFP	11	2007500000	1.1345	0.00173849	2.15316	1.1377	IARS	1.1345	2.15316
22.1787	23.4501	22.6852	24.7387	25.2513	24.777			+	SS18-SSX2_GFP	4	568570000	2.22025	0.000261364	2.15098	1.53135	MRPS22	2.22025	2.15098
26.5009	25.5064	25.5664	28.2476	28.2737	27.5007			+	SS18-SSX2_GFP	28	3710000000	2.19959	0.000258427	2.14938	1.52467	PLEC	2.19959	2.14938
23.58	23.0978	22.4877	25.0474	25.3833	25.1715			+	SS18-SSX2_GFP	8	739430000	2.535	0.000286604	2.14557	1.61208	DAP3	2.535	2.14557
23.8518	23.0048	23.9404	25.7125	25.6936	25.8253			+	SS18-SSX2_GFP	5	874000000	2.68813	0.000296774	2.14483	1.6486	FAF2	2.68813	2.14483
23.0586	22.0624	24.945	25.4415	25.5736	25.475			+	SS18-SSX2_GFP	3	849410000	1.18961	0.00125283	2.14138	1.15989	THOC3	1.18961	2.14138
21.5863	25.2683	25.1955	25.972	25.9159	26.5793			+	SS18-SSX2_GFP	6	1451000000	0.801335	0.00504425	2.139	0.957562	NDUFC2	0.801335	2.139
25.2127	23.219	24.851	26.1561	26.9015	26.6403			+	SS18-SSX2_GFP	12	1853800000	1.51775	0.000652361	2.13838	1.29525	GTPBP4	1.51775	2.13838
23.4059	22.3455	21.4556	23.1372	25.2133	25.2665			+	SS18-SSX2_GFP	3	561700000	1.11694	0.00186282	2.13668	1.1248	GNG5	1.11694	2.13668
22.1427	21.9325	23.4682	24.7623	24.6362	24.5519			+	SS18-SSX2_GFP	4	436670000	1.93461	0.000230576	2.13564	1.43856	DDX6	1.93461	2.13564
25.6406	22.1837	22.3296	25.9083	25.1892	25.4484			+	SS18-SSX2_GFP	10	882890000	0.863024	0.00374429	2.1307	0.991858	TUBB8	0.863024	2.1307
24.6392	22.4507	24.8795	25.773	26.7005	25.8772			+	SS18-SSX2_GFP	5	1581800000	1.20944	0.00126476	2.12712	1.16459	SLC1A5	1.20944	2.12712
23.1071	21.1997	23.0942	24.6763	24.5866	24.5129			+	SS18-SSX2_GFP	7	463270000	1.54178	0.00038961	2.12494	1.29934	TRRAP	1.54178	2.12494
22.5347	23.2955	22.5111	25.0155	24.8833	24.7807			+	SS18-SSX2_GFP	5	689190000	2.86359	0.000300654	2.11276	1.66827	DPF1	2.86359	2.11276
23.0099	23.6432	22.4398	25.4725	25.0408	24.9025			+	SS18-SSX2_GFP	3	4159000000	2.25551	0.000255556	2.10766	1.5189	PRKACB	2.25551	2.10766
22.6828	23.251	21.7971	24.6121	24.8552	24.5793			+	SS18-SSX2_GFP	4	434780000	2.08657	0.000239583	2.10523	1.47026	GNA13	2.08657	2.10523
22.5318	22.1475	21.9238	24.4133	24.098	24.3513			+	SS18-SSX2_GFP	3	852580000	3.30419	0.000315068	2.0865	1.73575	SYNE2	3.30419	2.0865
22.1604	22.7048	22.7148	24.6887	24.7047	24.4392			+	SS18-SSX2_GFP	5	469860000	3.30045	0.000312925	2.08421	1.73352	COPE	3.30045	2.08421
22.1308	24.8479	24.6781	25.9819	25.9862	25.9103			+	SS18-SSX2_GFP	6	1188400000	1.10933	0.00182011	2.07388	1.10364	GPC4	1.10933	2.07388
22.4459	24.2992	24.134	25.6924	25.8364	25.5647			+	SS18-SSX2_GFP	6	1122800000	1.59117	0.000655172	2.07146	1.29682	EIF3L	1.59117	2.07146
21.9356	24.6046	22.3903	25.2382	24.8868	25.0066			+	SS18-SSX2_GFP	6	646470000	1.16986	0.00187296	2.06704	1.12903	EMC2	1.16986	2.06704
26.5552	26.638	26.6887	28.682	28.7226	28.6783			+	SS18-SSX2_GFP	10	6705800000	6.01569	0.000398268	2.06702	1.98481	TECR	6.01569	2.06702
25.5629	25.8277	23.3987	26.8861	26.8351	27.2685			+	SS18-SSX2_GFP	18	2905400000	1.24201	0.00125758	2.0668	1.16021	CTNNA1	1.24201	2.0668
21.5843	22.7545	23.4629	24.7504	24.5714	24.6506			+	SS18-SSX2_GFP	3	486830000	1.69578	0.000203091	2.05694	1.32688	RCN2	1.69578	2.05694
24.8213	23.908	22.2141	25.5118	25.877	25.7216			+	SS18-SSX2_GFP	14	1149600000	1.25148	0.00125996	2.05569	1.16069	CTNNB1	1.25148	2.05569
22.999	22.61	22.9448	25.0479	24.843	24.8284			+	SS18-SSX2_GFP	5	585890000	3.89233	0.000338235	2.05516	1.80151	SRP72	3.89233	2.05516
26.0074	26.1632	25.9768	28.1991	28.0615	28.0521			+	SS18-SSX2_GFP	5	5144700000	4.98269	0.000378601	2.05511	1.91218	SSR4	4.98269	2.05511
22.2142	21.8447	22.2753	24.0554	24.1389	24.2843			+	SS18-SSX2_GFP	3	350460000	3.77554	0.000326241	2.04813	1.78061	CCT3	3.77554	2.04813
22.5002	22.6464	22.247	24.3742	24.667	24.4889			+	SS18-SSX2_GFP	7	451530000	3.84039	0.000329749	2.04554	1.78734	ERLIN1	3.84039	2.04554
26.3318	23.8238	25.754	27.1543	27.4865	27.3855			+	SS18-SSX2_GFP	5	3209900000	1.25176	0.00124578	2.03888	1.15543	NDUFA5	1.25176	2.03888
23.4167	24.7585	24.8097	26.3279	26.462	26.309			+	SS18-SSX2_GFP	5	1499000000	1.94709	0.000220624	2.03802	1.39728	DNAJC11	1.94709	2.03802
25.0511	25.1126	24.9668	27.2022	27.1061	26.9355			+	SS18-SSX2_GFP	11	2814300000	4.67249	0.000368	2.03776	1.87176	CSTF3	4.67249	2.03776
24.0343	22.6674	21.7644	24.737	24.9726	24.8568			+	SS18-SSX2_GFP	4	494340000	1.42654	0.00109312	2.03345	1.22254	TRMT1L	1.42654	2.03345
24.4876	24.2263	24.6715	26.3805	26.4887	26.6044			+	SS18-SSX2_GFP	3	1643700000	3.8271	0.000323944	2.02937	1.77324	NDUFB8	3.8271	2.02937
23.8951	22.7597	23.1481	25.1152	25.4131	25.3578			+	SS18-SSX2_GFP	4	826920000	2.37577	0.000252055	2.0277	1.50702	SIN3A	2.37577	2.0277
26.7182	27.0503	26.5293	28.8179	28.7483	28.7816			+	SS18-SSX2_GFP	30	9122200000	3.7113	0.000318339	2.0167	1.74816	MYO1C	3.7113	2.0167
22.581	23.1277	23.2854	24.8974	25.105	25.0197			+	SS18-SSX2_GFP	4	747990000	3.08508	0.00029582	2.00932	1.64463	PHF10	3.08508	2.00932
25.771	24.8447	25.4174	27.3842	27.2032	27.4516			+	SS18-SSX2_GFP	6	2704400000	2.69439	0.000269006	2.00198	1.5642	RAP1A	2.69439	2.00198
24.3221	22.395	22.5292	25.1817	25.2783	24.7869			+	SS18-SSX2_GFP	8	660460000	1.45345	0.00109091	2.0002	1.22028	KIDINS220	1.45345	2.0002
23.9297	22.7293	22.9384	25.2341	25.1946	25.1665			+	SS18-SSX2_GFP	3	701230000	2.24253	0.000235294	1.99927	1.45852	EXOSC9	2.24253	1.99927
27.1428	27.2905	27.2	29.2664	29.1713	29.1918			+	SS18-SSX2_GFP	8	10188000000	5.56896	0.00037247	1.99876	1.9003	ATP5O	5.56896	1.99876
22.9668	23.6356	24.6646	25.662	25.8339	25.748			+	SS18-SSX2_GFP	7	1134200000	1.79763	0.000203991	1.99226	1.3315	CASK	1.79763	1.99226
21.6101	21.8025	22.9431	23.9754	24.3692	23.9848			+	SS18-SSX2_GFP	2	323110000	1.98869	0.000216471	1.9912	1.38687	MRPS27	1.98869	1.9912
22.7676	22.1972	23.2921	25.0394	24.678	24.5115			+	SS18-SSX2_GFP	6	561090000	2.31502	0.000240838	1.99067	1.47186	XAB2	2.31502	1.99067
25.2458	23.0043	22.8728	25.6189	25.809	25.6566			+	SS18-SSX2_GFP	10	1077500000	1.20935	0.00184615	1.98723	1.12134	GTF3C1	1.20935	1.98723
23.0763	22.2852	21.916	24.2794	24.5347	24.4071			+	SS18-SSX2_GFP	5	376440000	2.31824	0.000237726	1.98127	1.4675	ASCC3	2.31824	1.98127
22.3696	23.0148	22.5037	24.4847	24.1682	25.167			+	SS18-SSX2_GFP	1	388930000	2.29657	0.000236504	1.97729	1.46007	TIMM9	2.29657	1.97729
22.2604	23.641	23.3068	25.053	25.3888	24.6859			+	SS18-SSX2_GFP	7	672590000	1.88569	0.000207675	1.97316	1.34895	SLC12A2	1.88569	1.97316
24.5319	22.6964	22.1402	25.2791	25.0536	24.9527			+	SS18-SSX2_GFP	6	701990000	1.26932	0.00158226	1.97231	1.14072	ARHGEF2	1.26932	1.97231
24.8251	25.1822	25.1563	27.0701	27.1331	26.8627			+	SS18-SSX2_GFP	4	2403000000	3.81513	0.000308725	1.96744	1.72429	LAMTOR1	3.81513	1.96744
22.5004	22.6285	22.4746	24.2881	24.7307	24.4851			+	SS18-SSX2_GFP	3	483250000	3.86936	0.000309764	1.96679	1.73047	BMS1	3.86936	1.96679
22.2099	25.3744	23.4154	25.6916	25.6722	25.5241			+	SS18-SSX2_GFP	2	1037200000	0.996663	0.0028169	1.96275	1.02033	NDUFAF4	0.996663	1.96275
24.6498	22.188	22.0189	24.7343	25.1508	24.851			+	SS18-SSX2_GFP	7	727220000	1.07216	0.00241042	1.9598	1.05412	CAD	1.07216	1.9598
22.3308	22.5828	24.9092	25.3738	24.9078	25.4072			+	SS18-SSX2_GFP	12	777050000	1.09928	0.00223394	1.95535	1.06478	GNB4	1.09928	1.95535
25.1062	21.3937	24.7364	25.5711	25.6978	25.8255			+	SS18-SSX2_GFP	8	1243200000	0.759082	0.0114095	1.95271	0.89452	PAF1	0.759082	1.95271
23.149	22.2267	23.2863	24.8925	25.0046	24.6194			+	SS18-SSX2_GFP	2	520030000	2.28675	0.000232323	1.95142	1.44357	RRAS2	2.28675	1.95142
23.6643	24.9581	23.9847	26.1017	26.4721	25.8683			+	SS18-SSX2_GFP	4	1296600000	1.98424	0.000211494	1.94499	1.36309	NDUFA2	1.98424	1.94499
22.9326	21.9965	22.5716	24.6727	24.2635	24.3698			+	SS18-SSX2_GFP	8	589160000	2.53289	0.000247312	1.93509	1.48984	GATAD2B	2.53289	1.93509
24.4355	22.5215	21.8161	24.8434	24.988	24.7464			+	SS18-SSX2_GFP	6	654400000	1.15806	0.00192217	1.93485	1.08354	ANAPC5	1.15806	1.93485
23.0156	23.0514	22.2402	24.5917	24.8441	24.6636			+	SS18-SSX2_GFP	4	473380000	2.66353	0.000254848	1.93077	1.51423	RAB35	2.66353	1.93077
22.2218	23.525	23.2728	25.0429	24.9508	24.8157			+	SS18-SSX2_GFP	4	602670000	2.05396	0.000213457	1.92993	1.37412	HS2ST1	2.05396	1.92993
25.5315	25.9349	25.823	27.9717	27.6202	27.4873			+	SS18-SSX2_GFP	17	3969900000	3.29446	0.000292063	1.92992	1.62453	CTNND1	3.29446	1.92992
22.8001	22.7991	22.8346	24.6966	24.6979	24.7964			+	SS18-SSX2_GFP	5	524550000	6.17703	0.000356589	1.91902	1.85406	ESF1	6.17703	1.91902
21.978	22.484	21.8156	23.962	24.2085	23.8609			+	SS18-SSX2_GFP	2	308510000	2.97436	0.000268222	1.9179	1.56409	FARP1	2.97436	1.9179
21.7734	23.523	21.9871	24.2945	24.3453	24.3919			+	SS18-SSX2_GFP	7	409600000	1.59306	0.000850716	1.91605	1.23476	GCN1	1.59306	1.91605
22.4482	22.1329	22.0661	23.8149	24.3298	24.222			+	SS18-SSX2_GFP	5	347790000	3.20277	0.000278788	1.90652	1.59392	HNRNPH3	3.20277	1.90652
22.4193	22.3815	22.7615	24.3416	24.3986	24.5162			+	SS18-SSX2_GFP	4	305410000	3.87523	0.000301639	1.89803	1.67769	NEXN	3.87523	1.89803
23.6601	21.8376	21.1091	24.0818	24.2308	23.9554			+	SS18-SSX2_GFP	3	319990000	1.16328	0.00207012	1.8871	1.0705	SRP54	1.16328	1.8871
22.5829	22.0771	23.0968	24.5069	24.4068	24.4504			+	SS18-SSX2_GFP	4	334130000	2.4937	0.000231738	1.86906	1.44242	USP10	2.4937	1.86906
25.6277	25.3739	25.566	27.3741	27.5162	27.2828			+	SS18-SSX2_GFP	20	3485600000	4.27799	0.000305648	1.8685	1.69518	KIAA1429	4.27799	1.8685
25.1188	24.711	22.5367	25.4355	26.5287	25.972			+	SS18-SSX2_GFP	10	1291500000	1.01152	0.00340244	1.8566	0.997453	DARS	1.01152	1.8566
22.6653	23.0434	22.1177	24.4819	24.458	24.452			+	SS18-SSX2_GFP	2	391910000	2.63575	0.000237113	1.85515	1.46206	FNBP4	2.63575	1.85515
25.8061	22.1328	25.8821	26.6099	26.4021	26.3629			+	SS18-SSX2_GFP	26	2071300000	0.678533	0.0180672	1.85129	0.826589	ATAD3B	0.678533	1.85129
24.919	24.6383	25.1394	26.9083	26.5573	26.7753			+	SS18-SSX2_GFP	9	1864100000	3.31875	0.000272997	1.84807	1.56957	VAPA	3.31875	1.84807
25.4514	24.9287	25.6096	26.8843	27.4041	27.2442			+	SS18-SSX2_GFP	11	2410900000	2.70385	0.000238961	1.8476	1.47008	AKAP2	2.70385	1.8476
21.6246	22.4985	21.3395	23.6616	23.8129	23.5105			+	SS18-SSX2_GFP	2	281330000	2.16249	0.000208617	1.8408	1.35411	SATB2	2.16249	1.8408
21.9322	23.3153	22.5383	24.3829	24.5386	24.3828			+	SS18-SSX2_GFP	3	409070000	1.98461	0.000200436	1.83949	1.31051	ABCC1	1.98461	1.83949
21.7319	21.7466	23.6199	24.1207	24.4047	24.0882			+	SS18-SSX2_GFP	4	369230000	1.35339	0.00185946	1.8384	1.12445	UFL1	1.35339	1.8384
22.7717	21.4394	23.5177	24.4931	24.0535	24.6958			+	SS18-SSX2_GFP	1	423130000	1.34943	0.00185278	1.83787	1.12288	MMGT1	1.34943	1.83787
22.106	23.4782	22.0811	24.2706	24.5158	24.3891			+	SS18-SSX2_GFP	3	430930000	1.76804	0.000863071	1.83677	1.25205	COIL	1.76804	1.83677
22.7564	22.34	23.4045	24.6419	24.7938	24.5741			+	SS18-SSX2_GFP	2	478810000	2.3579	0.00021957	1.83635	1.39493	ATP6V0A2	2.3579	1.83635
22.5864	24.9471	22.723	25.0551	25.4724	25.2348			+	SS18-SSX2_GFP	5	834220000	1.11412	0.00236045	1.83525	1.03415	WDR61	1.11412	1.83525
22.9413	21.941	22.5282	24.0933	24.3594	24.4489			+	SS18-SSX2_GFP	7	342270000	2.38912	0.000221154	1.83037	1.39801	YWHAB	2.38912	1.83037
24.6796	25.6928	25.3935	26.9229	26.7045	27.615			+	SS18-SSX2_GFP	12	2827600000	1.96081	0.000656587	1.82549	1.29745	CSNK2A1	1.96081	1.82549
22.9467	23.1078	23.0474	25.0942	24.6882	24.7955			+	SS18-SSX2_GFP	4	668080000	3.82292	0.0002875	1.82531	1.61499	EEF1E1	3.82292	1.82531
22.7642	23.2867	23.3583	25.1785	24.8515	24.8477			+	SS18-SSX2_GFP	3	683110000	2.95899	0.000251366	1.82281	1.4978	EMC7	2.95899	1.82281
22.3829	22.633	22.3192	24.3238	24.3572	24.1109			+	SS18-SSX2_GFP	4	414250000	3.91521	0.000290221	1.81897	1.6198	CDC42BPA	3.91521	1.81897
23.1233	22.9336	22.634	24.6834	24.8493	24.6108			+	SS18-SSX2_GFP	2	453370000	3.4763	0.000271386	1.81754	1.56823	TRAM1	3.4763	1.81754
21.5767	23.6587	22.8562	24.5223	24.4067	24.6069			+	SS18-SSX2_GFP	5	583890000	1.38988	0.00186957	1.81475	1.12785	RAD23B	1.38988	1.81475
23.5378	23.2743	23.5381	25.1541	25.4657	25.1734			+	SS18-SSX2_GFP	5	890180000	3.76742	0.000282209	1.81435	1.60034	RPRD2	3.76742	1.81435
24.0262	22.6938	22.2806	24.9427	24.7796	24.7052			+	SS18-SSX2_GFP	3	614120000	1.566	0.00128932	1.80893	1.18128	POLR2G	1.566	1.80893
24.9671	25.3793	22.7958	26.1625	26.1872	26.2059			+	SS18-SSX2_GFP	10	1505000000	1.05798	0.00324655	1.80444	1.00166	CUL3	1.05798	1.80444
22.3742	22.9647	24.2668	24.3448	25.0331	25.6349			+	SS18-SSX2_GFP	4	650220000	1.25889	0.00208403	1.8023	1.07799	RAE1	1.25889	1.8023
26.3722	26.5968	26.4978	28.2805	28.3444	28.2455			+	SS18-SSX2_GFP	10	6236100000	4.84026	0.000302632	1.80121	1.68159	NDUFS3	4.84026	1.80121
23.0985	22.4112	22.9204	24.5889	24.715	24.529			+	SS18-SSX2_GFP	2	478410000	2.96899	0.000244681	1.80093	1.48457	DRG1	2.96899	1.80093
22.293	25.1557	24.2036	25.749	25.6474	25.6311			+	SS18-SSX2_GFP	3	1067200000	0.997478	0.00411958	1.79172	0.972444	LSM2	0.997478	1.79172
21.7886	23.4841	24.2144	25.0056	24.8047	25.0434			+	SS18-SSX2_GFP	6	582160000	1.16449	0.00237179	1.78883	1.03861	RPRD1A	1.16449	1.78883
25.6185	26.7881	25.752	27.3819	28.2645	27.8726			+	SS18-SSX2_GFP	7	4973000000	1.78429	0.000847251	1.78684	1.23297	NDUFB10	1.78429	1.78684
22.8574	25.1962	23.0834	25.6058	25.3565	25.5097			+	SS18-SSX2_GFP	3	830560000	1.11752	0.00279938	1.77833	1.01715	TIA1	1.11752	1.77833
26.4446	26.674	26.4827	28.2791	28.4098	28.2315			+	SS18-SSX2_GFP	9	6230800000	4.43123	0.000292994	1.77304	1.6285	NDUFA8	4.43123	1.77304
25.2159	25.3726	24.9715	26.8796	27.0942	26.8602			+	SS18-SSX2_GFP	5	2410000000	3.65145	0.000262857	1.75798	1.54385	MPC2	3.65145	1.75798
22.5847	22.2929	22.4605	24.0842	24.3739	24.1516			+	SS18-SSX2_GFP	3	316060000	3.87396	0.000270588	1.75722	1.56659	MINA	3.87396	1.75722
28.5545	28.5236	28.2564	30.4255	30.1272	30.0528			+	SS18-SSX2_GFP	7	19683000000	3.53939	0.000259887	1.75703	1.53042	RPLP2	3.53939	1.75703
22.411	23.4727	25.0201	25.1116	25.7105	25.3365			+	SS18-SSX2_GFP	6	773910000	1.05879	0.00388537	1.7516	0.985485	PAICS	1.05879	1.7516
22.9322	24.6051	22.7851	25.0382	25.307	25.2285			+	SS18-SSX2_GFP	6	853320000	1.38618	0.0018169	1.75042	1.10149	CDC16	1.38618	1.75042
27.2666	26.9638	27.2918	28.8396	28.9961	28.9231			+	SS18-SSX2_GFP	18	8961300000	3.96418	0.000269795	1.74554	1.56597	TMPO	3.96418	1.74554
24.4364	24.9328	24.921	26.6377	26.6846	26.2045			+	SS18-SSX2_GFP	8	2182300000	2.83611	0.00022716	1.74553	1.42629	RPRD1B	2.83611	1.74553
24.8958	24.4303	24.5795	26.305	26.4783	26.356			+	SS18-SSX2_GFP	11	1718400000	3.54496	0.000256983	1.74456	1.52159	COPA	3.54496	1.74456
22.164	24.3788	22.3605	24.7065	24.8385	24.5779			+	SS18-SSX2_GFP	6	577610000	1.1495	0.00279503	1.73986	1.0164	ESYT2	1.1495	1.73986
23.7073	22.5403	21.9707	24.4222	24.5404	24.471			+	SS18-SSX2_GFP	3	416410000	1.56166	0.00140299	1.73844	1.14956	TOE1	1.56166	1.73844
21.872	22.7499	23.2397	24.0643	24.3965	24.6037			+	SS18-SSX2_GFP	2	267820000	1.80498	0.001328	1.73431	1.21296	TMED7-TICAM2	1.80498	1.73431
23.5655	23.4665	22.1398	24.7438	24.8915	24.7394			+	SS18-SSX2_GFP	5	465130000	1.70053	0.00129435	1.73425	1.18595	FAM208A	1.70053	1.73425
22.4507	23.5552	22.6246	24.5721	24.7705	24.4728			+	SS18-SSX2_GFP	7	555810000	2.08951	0.00064135	1.72829	1.27655	ANAPC1	2.08951	1.72829
22.3324	22.4038	22.7306	24.1607	24.2214	24.2564			+	SS18-SSX2_GFP	4	326460000	3.7853	0.000260623	1.72387	1.53133	DPF3	3.7853	1.72387
28.9533	28.9384	28.8131	30.6335	30.6061	30.6052			+	SS18-SSX2_GFP	17	24500000000	5.53074	0.000294872	1.71332	1.6389	RPL4	5.53074	1.71332
25.3574	22.1855	22.9994	25.5082	24.9914	25.1796			+	SS18-SSX2_GFP	6	711550000	0.823812	0.0139891	1.71228	0.87226	SNW1	0.823812	1.71228
25.1791	25.1244	25.9396	27.1543	27.1455	27.059			+	SS18-SSX2_GFP	17	2682900000	2.52382	0.000207207	1.70523	1.34817	PPP1R12A	2.52382	1.70523
21.8716	23.2953	21.4797	23.928	23.9052	23.8949			+	SS18-SSX2_GFP	5	270450000	1.42845	0.00195525	1.69382	1.09159	FYN	1.42845	1.69382
22.593	22.2767	23.1517	24.1588	24.3834	24.5473			+	SS18-SSX2_GFP	3	308470000	2.4226	0.000202198	1.68937	1.32034	TMED2	2.4226	1.68937
25.4206	25.1654	25.2851	27.2971	26.6581	26.9829			+	SS18-SSX2_GFP	8	2054300000	2.97904	0.00022276	1.68901	1.40909	TMEM43	2.97904	1.68901
27.3267	27.3363	27.529	28.9084	29.1793	29.1708			+	SS18-SSX2_GFP	9	8307500000	3.96841	0.000256267	1.68879	1.52052	RPL18A	3.96841	1.68879
22.8809	23.3224	23.763	24.9213	25.3237	24.7576			+	SS18-SSX2_GFP	5	732170000	2.27365	0.000646809	1.67877	1.28623	GTF3C4	2.27365	1.67877
26.5331	26.2245	25.9439	27.8559	28.0157	27.8338			+	SS18-SSX2_GFP	20	5450500000	3.12651	0.00022439	1.66798	1.41406	AP2A1	3.12651	1.66798
25.7465	26.0305	25.9343	27.727	27.4845	27.4885			+	SS18-SSX2_GFP	12	3677900000	3.86616	0.000247978	1.66289	1.49047	FLOT1	3.86616	1.66289
26.6432	26.6367	26.9447	28.4639	28.4901	28.2492			+	SS18-SSX2_GFP	10	6304900000	3.70274	0.00024147	1.65952	1.47245	SLC25A1	3.70274	1.65952
27.0494	27.331	27.4312	28.9069	28.8932	28.9895			+	SS18-SSX2_GFP	9	8037900000	3.82599	0.000244032	1.65936	1.48399	COX4I1	3.82599	1.65936
23.1765	23.2384	22.4475	24.632	24.447	24.7507			+	SS18-SSX2_GFP	4	465930000	2.45239	0.000199566	1.65579	1.30492	ATP13A1	2.45239	1.65579
21.8466	21.9068	22.9453	23.9259	23.879	23.8541			+	SS18-SSX2_GFP	2	276750000	2.00798	0.00108434	1.65343	1.21824	PPP2R1A	2.00798	1.65343
22.6271	22.9292	22.7984	24.5591	24.1223	24.6286			+	SS18-SSX2_GFP	4	548560000	3.09714	0.000221687	1.65174	1.39862	MBD3	3.09714	1.65174
24.0076	23.4799	23.979	25.5894	25.8669	24.9497			+	SS18-SSX2_GFP	6	898680000	2.16437	0.000855967	1.64649	1.24631	AHCTF1	2.16437	1.64649
26.4795	26.2658	26.5749	28.1724	28.1187	27.9416			+	SS18-SSX2_GFP	30	5620800000	3.85093	0.000238342	1.6375	1.4687	MKI67	3.85093	1.6375
23.8299	22.0918	22.7689	24.4156	24.8053	24.3796			+	SS18-SSX2_GFP	5	417090000	1.45119	0.00207705	1.6366	1.07399	ABCB10	1.45119	1.6366
22.6906	22.2738	22.6602	24.0932	24.2941	24.1464			+	SS18-SSX2_GFP	2	268770000	3.43106	0.000227723	1.63638	1.42665	MRPL39	3.43106	1.63638
21.9659	22.6465	23.7607	24.5889	24.2565	24.4326			+	SS18-SSX2_GFP	4	376420000	1.43006	0.0020598	1.63494	1.06729	SMC3	1.43006	1.63494
26.9734	26.6764	26.7459	28.5997	28.3978	28.2899			+	SS18-SSX2_GFP	9	6470200000	3.66472	0.000232911	1.63055	1.44598	VDAC3	3.66472	1.63055
24.0434	21.711	24.0014	24.7357	24.7509	25.16			+	SS18-SSX2_GFP	4	567190000	0.975649	0.00874894	1.63029	0.914357	MAGT1	0.975649	1.63029
25.2982	25.3673	23.0673	26.1972	26.3246	26.0887			+	SS18-SSX2_GFP	6	1497500000	1.00572	0.0074465	1.62589	0.924591	ZNF326	1.00572	1.62589
22.7996	23.9499	23.3471	24.9408	25.1114	24.9121			+	SS18-SSX2_GFP	2	622620000	2.06328	0.00132535	1.62253	1.21267	PTDSS1	2.06328	1.62253
23.9307	22.5633	23.1777	24.7772	25.0554	24.6984			+	SS18-SSX2_GFP	3	601570000	1.7746	0.00140037	1.61979	1.14881	MRS2	1.7746	1.61979
24.6365	25.1687	25.2613	26.6192	26.6798	26.6132			+	SS18-SSX2_GFP	8	3078700000	2.92868	0.000208145	1.61518	1.35069	TFCP2	2.92868	1.61518
28.2266	27.8203	27.9781	29.5075	29.7104	29.6512			+	SS18-SSX2_GFP	7	14866000000	3.58169	0.000226601	1.61471	1.4255	COX5A	3.58169	1.61471
22.6701	23.9918	23.0344	24.6688	25.046	24.8074			+	SS18-SSX2_GFP	2	521710000	1.76715	0.00158519	1.60861	1.14146	SURF4	1.76715	1.60861
27.1891	26.915	27.3058	28.6887	28.8618	28.6832			+	SS18-SSX2_GFP	16	8077400000	3.61203	0.00022549	1.60791	1.42315	ABCD3	3.61203	1.60791
28.0194	27.4212	27.8316	29.235	29.5972	29.2588			+	SS18-SSX2_GFP	35	13882000000	2.78965	0.000202643	1.60623	1.32543	MYO1D	2.78965	1.60623
28.6659	28.6771	28.711	30.389	30.1476	30.3313			+	SS18-SSX2_GFP	20	22577000000	4.57198	0.000250681	1.6046	1.49401	UQCRC2	4.57198	1.6046
24.9235	25.8773	25.8921	26.9966	27.1697	27.3062			+	SS18-SSX2_GFP	14	2488700000	2.05946	0.00130452	1.59318	1.19545	PRKAR2A	2.05946	1.59318
24.7659	23.6097	23.5994	25.257	26.0068	25.4857			+	SS18-SSX2_GFP	4	894720000	1.63003	0.00181053	1.59157	1.10051	EXOSC4	1.63003	1.59157
26.5165	26.876	26.49	28.2014	28.1981	28.257			+	SS18-SSX2_GFP	23	5576500000	3.64629	0.000223844	1.59137	1.41338	AP2B1	3.64629	1.59137
25.6781	26.1216	21.8884	26.234	25.9724	26.2495					3	1358900000	0.51826	0.0516659	1.58927	0.677358	RPS29	0.51826	1.58927
21.3916	25.6235	24.4623	25.4169	25.7094	25.1112			+	SS18-SSX2_GFP	6	828310000	0.551298	0.0437811	1.5867	0.697704	YME1L1	0.551298	1.5867
24.209	24.2221	23.8369	25.121	26.0827	25.7764			+	SS18-SSX2_GFP	6	1278500000	2.14347	0.00130966	1.57066	1.19853	CTNNBL1	2.14347	1.57066
23.146	23.0061	22.5721	24.454	24.3458	24.6243			+	SS18-SSX2_GFP	4	364360000	2.9208	0.000201754	1.56662	1.31556	RHOT2	2.9208	1.56662
22.7607	22.8824	22.6008	24.2233	24.142	24.5705			+	SS18-SSX2_GFP	3	380980000	3.26918	0.000209091	1.56396	1.35449	AFAP1	3.26918	1.56396
22.8421	21.8495	23.2298	24.1633	24.2954	24.1521			+	SS18-SSX2_GFP	5	291540000	1.71116	0.00182655	1.56313	1.10578	TPM4	1.71116	1.56313
25.3641	25.4442	24.7896	26.8083	26.801	26.6686			+	SS18-SSX2_GFP	12	2810600000	2.74762	0.000649573	1.55998	1.28807	MRE11A	2.74762	1.55998
23.8528	23.5173	23.3468	25.1404	25.1325	25.1192			+	SS18-SSX2_GFP	2	620950000	3.3284	0.000210046	1.55839	1.35657	LLPH	3.3284	1.55839
25.3452	25.6089	25.5005	27.2244	26.9071	26.9976			+	SS18-SSX2_GFP	4	2287100000	3.67154	0.000217494	1.55819	1.38939	CALM2	3.67154	1.55819
24.1227	24.4687	22.2656	25.3796	25.1199	25.0209			+	SS18-SSX2_GFP	5	817640000	1.05498	0.00849502	1.55449	0.918538	GK	1.05498	1.55449
24.5788	25.068	24.8675	26.311	26.5338	26.3248			+	SS18-SSX2_GFP	10	1641600000	3.20675	0.000205817	1.55178	1.3386	CHD1	3.20675	1.55178
24.5976	24.4725	24.5632	25.9769	26.2496	26.0583			+	SS18-SSX2_GFP	7	1277300000	4.1955	0.000226044	1.5505	1.42378	RIF1	4.1955	1.5505
26.0721	25.978	25.8943	27.528	27.6172	27.4478			+	SS18-SSX2_GFP	13	3728100000	4.58535	0.000233503	1.54954	1.44691	CAND1	4.58535	1.54954
22.4481	22.0734	23.0994	24.2888	23.845	24.1279			+	SS18-SSX2_GFP	3	258780000	2.04269	0.00126718	1.54691	1.16605	LRRFIP2	2.04269	1.54691
23.8263	23.097	22.4472	24.5703	24.9133	24.5254			+	SS18-SSX2_GFP	5	669490000	1.68509	0.00195189	1.54615	1.09136	CXorf57	1.68509	1.54615
26.2763	25.8091	26.5916	27.7686	27.8483	27.6865			+	SS18-SSX2_GFP	11	3863300000	2.57489	0.000861284	1.54213	1.25168	STT3A	2.57489	1.54213
26.201	25.932	26.2034	27.499	27.7095	27.738			+	SS18-SSX2_GFP	10	3622300000	3.70587	0.000214452	1.53667	1.37519	SF3A3	3.70587	1.53667
25.0575	25.1416	21.7547	25.667	25.5411	25.3476			+	SS18-SSX2_GFP	21	1116000000	0.615552	0.037087	1.53395	0.723865	SMARCA1	0.615552	1.53395
27.5979	27.6429	27.6041	29.1082	29.1839	29.1462			+	SS18-SSX2_GFP	12	10232000000	6.30286	0.000248649	1.53117	1.49236	RPL10	6.30286	1.53117
24.7406	24.8431	24.9192	26.2249	26.5745	26.2969			+	SS18-SSX2_GFP	10	1922300000	3.68449	0.000212471	1.53114	1.36895	ESYT1	3.68449	1.53114
28.6274	28.5848	28.6169	30.1932	30.1356	30.0892			+	SS18-SSX2_GFP	13	20514000000	5.90367	0.000242744	1.52963	1.48121	RPSA	5.90367	1.52963
25.1133	25.3842	23.1492	26.1857	26.1394	25.9012			+	SS18-SSX2_GFP	4	1274800000	1.00933	0.0115056	1.52651	0.89286	EEF1B2	1.00933	1.52651
24.6245	24.5097	24.6187	25.6864	26.321	26.3215			+	SS18-SSX2_GFP	8	1268900000	2.68182	0.000866667	1.52531	1.25552	SNTB2	2.68182	1.52531
24.7938	22.441	25.5305	25.6906	25.6221	26.0259			+	SS18-SSX2_GFP	7	1059400000	0.744318	0.0256745	1.52442	0.785797	NKRF	0.744318	1.52442
22.0485	23.1279	22.0082	23.9717	24.0494	23.716			+	SS18-SSX2_GFP	3	310580000	1.78889	0.0018042	1.51748	1.0994	UTP20	1.78889	1.51748
28.8843	28.8181	29.08	30.4861	30.447	30.3814			+	SS18-SSX2_GFP	54	27090000000	4.24345	0.000218527	1.5107	1.3932	CLTC	4.24345	1.5107
27.2112	27.316	27.1469	28.9163	28.6311	28.645			+	SS18-SSX2_GFP	8	8011300000	3.86079	0.000211009	1.50609	1.36286	RPL12	3.86079	1.50609
24.7879	23.5435	22.3239	24.96	25.0219	25.1898			+	SS18-SSX2_GFP	5	701310000	0.987709	0.0129877	1.50548	0.87803	ZNF512B	0.987709	1.50548
23.0292	23.3518	23.6543	24.7499	24.9999	24.7599			+	SS18-SSX2_GFP	1	435130000	2.77776	0.000854209	1.49146	1.2448	ENY2	2.77776	1.49146
24.7555	25.7028	24.7685	26.4641	26.6524	26.577			+	SS18-SSX2_GFP	3	1721200000	2.02366	0.00187636	1.48891	1.12937	LSM8	2.02366	1.48891
25.2845	25.0478	25.1873	26.6371	26.7358	26.6109			+	SS18-SSX2_GFP	10	2286900000	4.34014	0.000215457	1.48809	1.37973	CORO1C	4.34014	1.48809
21.6875	23.3916	23.7247	24.1469	24.77	24.3401			+	SS18-SSX2_GFP	6	358730000	1.06133	0.0111676	1.48439	0.895689	NEFL	1.06133	1.48439
21.7906	22.4543	25.1169	24.7186	24.5846	24.5045			+	SS18-SSX2_GFP	5	470370000	0.659002	0.0346108	1.48194	0.734254	G3BP2	0.659002	1.48194
28.0917	28.0006	28.017	29.5953	29.3131	29.6414			+	SS18-SSX2_GFP	10	12788000000	3.81023	0.000205357	1.48012	1.33779	RPL7	3.81023	1.48012
24.4836	24.3472	22.8591	25.1761	25.3781	25.5683			+	SS18-SSX2_GFP	6	910620000	1.30037	0.00458247	1.47752	0.964156	IGF2BP3	1.30037	1.47752
23.1889	22.1102	22.1677	23.8402	24.0733	23.973			+	SS18-SSX2_GFP	3	302330000	1.83839	0.00192869	1.47324	1.08581	EXOSC3	1.83839	1.47324
25.5887	25.9554	25.5613	27.0086	27.5739	26.9374			+	SS18-SSX2_GFP	12	2764200000	2.45829	0.00129688	1.47151	1.18855	PRPF3	2.45829	1.47151
22.2553	23.4788	22.8576	24.2786	24.3709	24.3477			+	SS18-SSX2_GFP	2	377560000	1.844	0.00192542	1.46847	1.0843	HSD17B12	1.844	1.46847
25.4265	25.9373	21.7043	25.7544	26.0228	25.6831					6	1298800000	0.474505	0.0754868	1.46405	0.626186	ATP6V0D1	0.474505	1.46405
25.5605	25.6877	25.9303	27.1135	26.9755	27.4815			+	SS18-SSX2_GFP	18	3598800000	2.85187	0.00084898	1.46403	1.23449	CTTN	2.85187	1.46403
26.1591	26.5694	26.4886	27.7361	28.0809	27.7759			+	SS18-SSX2_GFP	22	4835600000	3.03215	0.000859504	1.45859	1.25076	SCRIB	3.03215	1.45859
23.9801	23.5543	23.794	24.91	25.1985	25.5941			+	SS18-SSX2_GFP	3	702860000	2.47486	0.00129183	1.45807	1.18209	TOMM5	2.47486	1.45807
23.7461	22.6347	22.5707	24.5517	24.321	24.4477			+	SS18-SSX2_GFP	5	371020000	1.70367	0.00238325	1.45628	1.04967	GTF3C5	1.70367	1.45628
22.6378	22.3974	22.7467	24.1286	23.9795	24.0378			+	SS18-SSX2_GFP	3	265760000	3.69392	0.0002	1.45467	1.30823	SUN2	3.69392	1.45467
25.3954	25.4555	25.3349	26.7275	27.0081	26.8132			+	SS18-SSX2_GFP	12	2298200000	4.06642	0.000204444	1.45435	1.33425	ZC3H11A	4.06642	1.45435
27.2494	27.0848	26.6926	28.3126	28.6292	28.4351			+	SS18-SSX2_GFP	10	7055900000	2.80805	0.00108871	1.45003	1.21941	SAMM50	2.80805	1.45003
25.3774	25.5677	22.2937	25.8677	25.9981	25.7069			+	SS18-SSX2_GFP	12	1004200000	0.608661	0.0430117	1.44463	0.699792	SDHA	0.608661	1.44463
22.8512	22.9213	22.1393	23.9367	24.2832	24.0178			+	SS18-SSX2_GFP	3	291200000	2.22276	0.00173211	1.44199	1.13469	SACM1L	2.22276	1.44199
22.8521	23.0134	22.2264	24.3737	23.9836	24.0517			+	SS18-SSX2_GFP	4	267400000	2.23325	0.00172894	1.43909	1.13451	DLG1	2.23325	1.43909
26.0168	25.4365	25.7706	27.1097	27.2977	27.1136			+	SS18-SSX2_GFP	15	3415600000	2.87632	0.00133066	1.43232	1.21462	LYN	2.87632	1.43232
26.5578	26.24	26.1706	27.7027	27.8499	27.7111			+	SS18-SSX2_GFP	8	3604500000	3.43399	0.00087395	1.43174	1.26882	COX6C	3.43399	1.43174
25.1351	25.1426	25.2193	26.657	26.5742	26.5601			+	SS18-SSX2_GFP	13	1972500000	5.41907	0.000214953	1.43145	1.37578	LOC102724159	5.41907	1.43145
28.2917	27.6467	27.9266	29.3986	29.3991	29.3615			+	SS18-SSX2_GFP	46	14741000000	2.80408	0.00131485	1.43143	1.20576	MYO18A	2.80408	1.43143
25.1	25.0265	24.9522	27.022	26.3989	25.9445			+	SS18-SSX2_GFP	5	2061100000	1.97665	0.00193526	1.42888	1.08643	SOAT1	1.97665	1.42888
25.383	22.1418	24.8393	25.8099	25.3705	25.4584			+	SS18-SSX2_GFP	5	918350000	0.635322	0.0414212	1.42485	0.708492	SLIRP	0.635322	1.42485
26.372	26.5822	25.9084	27.7669	27.7091	27.6151			+	SS18-SSX2_GFP	8	3409300000	2.6388	0.00128185	1.40948	1.17077	CSTF1	2.6388	1.40948
25.4628	25.5108	25.3053	26.6734	26.7831	27.0467			+	SS18-SSX2_GFP	3	2172500000	3.42499	0.000857732	1.40809	1.24947	NDUFA6	3.42499	1.40809
26.7142	26.5408	26.718	27.7249	28.189	28.2815			+	SS18-SSX2_GFP	6	4982600000	2.82367	0.00130196	1.40746	1.1909	SNRPA	2.82367	1.40746
23.5581	22.3556	23.6062	24.8913	24.495	24.309			+	SS18-SSX2_GFP	4	608960000	1.45658	0.00457567	1.39181	0.964075	CWC22	1.45658	1.39181
22.3063	22.2813	22.4947	23.5556	23.7187	23.9768			+	SS18-SSX2_GFP	3	210860000	3.2388	0.00108652	1.38957	1.21902	EPHX1	3.2388	1.38957
24.8771	22.9831	22.8954	24.9721	24.9454	25.0054			+	SS18-SSX2_GFP	7	744650000	1.00793	0.0155979	1.38909	0.843581	QARS	1.00793	1.38909
23.5679	23.2984	22.3577	24.4682	24.5323	24.3877			+	SS18-SSX2_GFP	2	374190000	1.70374	0.00296136	1.3881	1.01379	DERL1	1.70374	1.3881
25.2965	24.9222	22.1939	25.6057	25.721	25.2313			+	SS18-SSX2_GFP	6	1048200000	0.629212	0.0443565	1.38181	0.694757	EIF3H	0.629212	1.38181
23.2543	24.1326	23.9739	24.7946	25.6093	25.0931			+	SS18-SSX2_GFP	5	673150000	1.72976	0.00295679	1.37875	1.01374	LRCH2	1.72976	1.37875
22.7641	23.4948	21.6652	23.9135	24.0074	24.1281			+	SS18-SSX2_GFP	3	281570000	1.20712	0.0114254	1.37501	0.895591	RAB14	1.20712	1.37501
26.773	26.5839	26.7423	28.155	28.1897	27.8736			+	SS18-SSX2_GFP	10	4480000000	3.53548	0.000845528	1.37305	1.23035	PHGDH	3.53548	1.37305
24.6136	24.7402	24.8284	25.789	26.3708	26.1261			+	SS18-SSX2_GFP	3	1350500000	2.79523	0.00125047	1.36792	1.15944	LRRC59	2.79523	1.36792
27.3683	27.3128	27.2792	28.6867	28.7969	28.5786			+	SS18-SSX2_GFP	23	9055800000	4.43791	0.000642706	1.3673	1.28003	THOC2	4.43791	1.3673
23.8658	21.6044	23.2172	24.3406	24.2113	24.2359			+	SS18-SSX2_GFP	4	381910000	0.949756	0.0197344	1.36682	0.816769	CYFIP1	0.949756	1.36682
22.5438	22.6558	22.5946	23.7817	24.0978	23.9446			+	SS18-SSX2_GFP	2	221940000	3.8051	0.000843813	1.34327	1.22466	MRPL21	3.8051	1.34327
22.2106	23.2484	21.9492	23.9888	23.8238	23.6187			+	SS18-SSX2_GFP	6	356740000	1.50897	0.00548538	1.34106	0.950487	NIPBL	1.50897	1.34106
24.9515	24.0585	24.7903	25.9667	25.9984	25.8465			+	SS18-SSX2_GFP	12	1289800000	2.0626	0.00237942	1.33712	1.04573	OGDH	2.0626	1.33712
21.8857	23.2535	21.5032	23.5784	23.592	23.4803			+	SS18-SSX2_GFP	2	198210000	1.17971	0.01397	1.33609	0.871848	RPA3	1.17971	1.33609
23.5385	22.2896	24.9512	25.1601	24.8962	24.7269			+	SS18-SSX2_GFP	3	614460000	0.79086	0.0314029	1.33461	0.75017	ATP6V1A	0.79086	1.33461
23.5797	24.0642	23.917	25.0291	25.429	25.1063			+	SS18-SSX2_GFP	5	803510000	2.67691	0.00184946	1.33453	1.1228	NOP9	2.67691	1.33453
25.0688	25.0917	24.7979	26.5565	26.2776	26.1274			+	SS18-SSX2_GFP	22	1670600000	2.97642	0.00140824	1.33435	1.1531	HNRNPK	2.97642	1.33435
23.8922	25.7962	25.893	26.5796	26.4049	26.581			+	SS18-SSX2_GFP	10	1844000000	0.95026	0.0228377	1.32804	0.802923	RBM10	0.95026	1.32804
21.9732	22.3991	23.3812	23.9186	23.979	23.8141			+	SS18-SSX2_GFP	3	229290000	1.45946	0.00716212	1.31942	0.929382	LETM1	1.45946	1.31942
23.4229	22.5414	22.2008	23.9591	24.1889	23.974			+	SS18-SSX2_GFP	5	312890000	1.62314	0.00456213	1.31895	0.961604	FANCI	1.62314	1.31895
22.8188	22.4719	22.6463	23.7394	24.1807	23.962			+	SS18-SSX2_GFP	3	355250000	2.90193	0.00172263	1.31505	1.13168	PCID2	2.90193	1.31505
30.9255	31.0756	30.9889	32.4343	32.1688	32.3243			+	SS18-SSX2_GFP	107	91030000000	3.91998	0.00131746	1.31245	1.20578	FLNA	3.91998	1.31245
24.3217	24.5388	24.6388	25.5774	25.9761	25.8775			+	SS18-SSX2_GFP	2	1133900000	3.00112	0.00173529	1.31057	1.13754	LSM3	3.00112	1.31057
24.6099	24.3466	24.998	26.0201	26.0373	25.8183			+	SS18-SSX2_GFP	7	1193200000	2.53307	0.00194521	1.30705	1.08754	MARS	2.53307	1.30705
22.912	22.3878	22.4933	23.8437	24.1593	23.7097			+	SS18-SSX2_GFP	2	618310000	2.4818	0.00209106	1.30651	1.08129	KMT2A	2.4818	1.30651
22.5361	24.1682	22.6833	24.3842	24.486	24.4261			+	SS18-SSX2_GFP	2	367550000	1.17343	0.0150336	1.30291	0.856013	EFHD1	1.17343	1.30291
25.1512	24.5128	25.5335	26.2101	26.6235	26.2457			+	SS18-SSX2_GFP	13	2065600000	1.78214	0.003994	1.29394	0.975978	TRIP12	1.78214	1.29394
22.8232	22.601	22.7916	24.2519	24.1048	23.7224			+	SS18-SSX2_GFP	3	328060000	2.76542	0.00180105	1.28776	1.09841	CSK	2.76542	1.28776
22.7821	22.5998	23.0364	24.0704	24.2371	23.9653			+	SS18-SSX2_GFP	2	526850000	2.99887	0.00183957	1.28481	1.11789	POLR2D	2.99887	1.28481
22.8689	23.2284	22.1303	23.7536	24.2295	24.0904			+	SS18-SSX2_GFP	4	372100000	1.65602	0.0060262	1.28193	0.947648	SRCAP	1.65602	1.28193
25.7776	25.4542	25.3212	26.9796	26.5901	26.8198			+	SS18-SSX2_GFP	5	1611000000	2.71566	0.00193857	1.27884	1.08702	BCAP31	2.71566	1.27884
28.1756	27.8918	28.0839	29.342	29.357	29.265			+	SS18-SSX2_GFP	20	14503000000	3.86765	0.00127203	1.27091	1.16776	SSRP1	3.86765	1.27091
22.9453	22.5389	23.1467	24.0636	24.1946	24.1832			+	SS18-SSX2_GFP	2	340530000	2.64009	0.00207358	1.27023	1.07319	WDR75	2.64009	1.27023
22.938	23.0967	25.0809	24.83	24.9983	25.0962			+	SS18-SSX2_GFP	3	609160000	0.850161	0.0315006	1.26965	0.749614	PPIB	0.850161	1.26965
22.5024	24.3407	23.3901	24.2492	24.9256	24.865			+	SS18-SSX2_GFP	4	461160000	1.03996	0.0220834	1.26883	0.806597	GEMIN4	1.03996	1.26883
22.7815	22.7022	22.7974	23.8368	24.4169	23.8294			+	SS18-SSX2_GFP	4	283740000	2.5238	0.00243021	1.26734	1.05891	KIF5B	2.5238	1.26734
22.8237	22.4225	22.3844	23.8208	23.8697	23.7204			+	SS18-SSX2_GFP	4	262730000	2.98986	0.00179791	1.26005	1.09833	TCP1	2.98986	1.26005
26.6717	26.8064	26.833	27.8671	28.3967	27.8119			+	SS18-SSX2_GFP	10	5900100000	2.53969	0.0023987	1.25489	1.05189	NDUFS2	2.53969	1.25489
26.0385	25.4533	25.2552	26.7544	26.8145	26.939			+	SS18-SSX2_GFP	11	2525600000	2.18434	0.00312135	1.25362	1.00989	AP2M1	2.18434	1.25362
28.2098	28.0649	28.2863	29.416	29.5053	29.3966			+	SS18-SSX2_GFP	10	11080000000	4.16821	0.0012696	1.25227	1.16703	RPS16	4.16821	1.25227
25.1804	25.42	25.2126	26.8905	26.3198	26.3538			+	SS18-SSX2_GFP	8	1523600000	2.4807	0.0023756	1.25039	1.04244	PA2G4	2.4807	1.25039
22.1633	24.0299	23.9923	24.3145	24.9172	24.7004			+	SS18-SSX2_GFP	3	560970000	0.909769	0.0293642	1.24885	0.761146	NOL9	0.909769	1.24885
24.3998	22.362	24.2651	24.7391	25.2302	24.7959			+	SS18-SSX2_GFP	2	580630000	0.856799	0.032361	1.24607	0.743485	POLR2L	0.856799	1.24607
24.6597	23.5906	22.9039	24.8822	25.2419	24.7673			+	SS18-SSX2_GFP	7	660370000	1.10427	0.0199898	1.24576	0.813966	NUP188	1.10427	1.24576
22.2471	22.5956	21.3749	23.43	23.5582	22.9552			+	SS18-SSX2_GFP	2	323480000	1.42132	0.0126281	1.2419	0.882828	GRWD1	1.42132	1.2419
27.4079	27.4829	27.4096	28.7005	28.7589	28.5644			+	SS18-SSX2_GFP	13	9268900000	4.41547	0.00127447	1.2411	1.16788	RBBP7	4.41547	1.2411
22.3037	23.302	24.4223	24.4938	24.8428	24.4136			+	SS18-SSX2_GFP	6	730800000	0.926267	0.0293284	1.24073	0.763087	BAIAP2	0.926267	1.24073
30.5983	30.6251	30.7227	31.8845	31.9717	31.8114			+	SS18-SSX2_GFP	151	75151000000	4.49639	0.00127938	1.24048	1.1705	PRKDC	4.49639	1.24048
25.4904	25.7176	25.684	26.8244	27.0886	26.6983			+	SS18-SSX2_GFP	7	2556500000	3.10689	0.00195862	1.23977	1.09226	C14orf166	3.10689	1.23977
25.9843	26.3101	26.1611	27.2328	27.6744	27.2651			+	SS18-SSX2_GFP	14	3307500000	2.7203	0.00242226	1.23893	1.05848	XPO1	2.7203	1.23893
24.4786	24.3572	24.3506	25.5822	25.8283	25.4848			+	SS18-SSX2_GFP	5	1007500000	3.44213	0.00183304	1.2363	1.11344	FMR1	3.44213	1.2363
28.1738	28.0289	27.7657	29.2138	29.2697	29.1672			+	SS18-SSX2_GFP	52	17625000000	3.24577	0.0019654	1.2274	1.0929	CHD4	3.24577	1.2274
22.3444	23.4209	22.9457	24.086	24.3593	23.92			+	SS18-SSX2_GFP	3	322040000	1.64942	0.00892918	1.2181	0.911226	AP3B1	1.64942	1.2181
23.5237	23.2415	22.9287	24.4392	24.5469	24.3557			+	SS18-SSX2_GFP	4	403200000	2.59651	0.00251828	1.21593	1.02998	UTP18	2.59651	1.21593
24.2838	22.4996	21.7567	23.8173	24.44	23.9293			+	SS18-SSX2_GFP	4	394710000	0.718098	0.0486129	1.21555	0.685212	INTS1	0.718098	1.21555
29.0297	28.5868	28.9764	30.0788	30.0781	30.0818			+	SS18-SSX2_GFP	17	18929000000	3.01826	0.00204959	1.21527	1.0664	RPL7A	3.01826	1.21527
23.2466	22.5717	22.5585	23.9668	24.054	23.9904			+	SS18-SSX2_GFP	2	283560000	2.21485	0.00389124	1.21145	0.985975	CLASP2	2.21485	1.21145
26.9624	26.8671	26.702	28.0938	28.0165	28.0434			+	SS18-SSX2_GFP	12	5311300000	3.96335	0.00184286	1.20738	1.11861	DDX39B	3.96335	1.20738
26.264	26.4368	26.008	27.3128	27.4707	27.5416			+	SS18-SSX2_GFP	7	3551700000	2.97978	0.00241436	1.20542	1.0558	RAC1	2.97978	1.20542
28.7441	28.8391	28.744	30.1492	29.786	29.995			+	SS18-SSX2_GFP	39	19224000000	3.40007	0.00209459	1.20097	1.08206	EPB41L2	3.40007	1.20097
24.9975	24.9413	25.1103	26.384	26.1762	26.0834			+	SS18-SSX2_GFP	5	1786300000	3.52531	0.00194188	1.19815	1.08744	TIMM50	3.52531	1.19815
22.78	22.108	23.5344	23.8871	24.267	23.858			+	SS18-SSX2_GFP	3	321120000	1.29653	0.0167791	1.19655	0.835264	MPP6	1.29653	1.19655
25.6999	25.6302	25.9041	26.852	26.8751	27.0915			+	SS18-SSX2_GFP	14	2076300000	3.35726	0.00208054	1.19481	1.07434	DOCK7	3.35726	1.19481
26.559	26.1907	25.9697	27.3913	27.4261	27.4678			+	SS18-SSX2_GFP	12	2826500000	2.62605	0.00313097	1.18862	1.01306	CDK11B	2.62605	1.18862
26.0735	26.0827	26.0548	27.4799	27.0552	27.2378			+	SS18-SSX2_GFP	5	2874000000	3.18699	0.0024183	1.18731	1.057	RPS21	3.18699	1.18731
25.7995	25.6295	25.3269	26.8317	26.8754	26.6037			+	SS18-SSX2_GFP	13	2456400000	2.73249	0.0028125	1.18494	1.01989	CDC27	2.73249	1.18494
22.9664	23.188	22.8966	24.0447	24.2056	24.3512			+	SS18-SSX2_GFP	2	245280000	3.16236	0.0024026	1.18348	1.05225	ATP11C	3.16236	1.18348
26.438	26.4971	26.5997	27.8513	27.7128	27.5207			+	SS18-SSX2_GFP	6	3865900000	3.42205	0.00206323	1.18331	1.06905	CAPZA1	3.42205	1.18331
22.3792	22.7748	22.2456	23.7821	23.7309	23.4329			+	SS18-SSX2_GFP	2	227960000	2.44703	0.0037386	1.18206	0.991165	MTFR1	2.44703	1.18206
23.2099	23.6717	24.5598	25.2679	24.8197	24.8945			+	SS18-SSX2_GFP	4	614390000	1.31699	0.0173732	1.18022	0.831351	EIF3I	1.31699	1.18022
26.2865	26.4135	26.1815	27.5929	27.5252	27.3038			+	SS18-SSX2_GFP	25	3078300000	3.36751	0.00243421	1.18014	1.06311	RANBP2	3.36751	1.18014
25.5035	25.7304	25.4733	26.7823	26.9465	26.5118			+	SS18-SSX2_GFP	15	2419400000	2.84231	0.00283019	1.1778	1.02377	DHX30	2.84231	1.1778
26.4819	26.5716	26.9158	27.8415	27.9305	27.725			+	SS18-SSX2_GFP	10	4632300000	2.90049	0.00270681	1.17588	1.02696	RBMX	2.90049	1.17588
28.231	28.3179	28.3646	29.3755	29.5745	29.4803			+	SS18-SSX2_GFP	14	12250000000	4.13922	0.00178856	1.17232	1.09609	RPS19	4.13922	1.17232
22.403	26.0538	26.3057	25.9032	26.2623	26.1126					7	1825400000	0.390642	0.155936	1.1719	0.517322	SEC61A1	0.390642	1.1719
23.5893	23.3653	23.6472	24.5098	24.8961	24.7074			+	SS18-SSX2_GFP	3	403500000	2.94159	0.0028436	1.1705	1.02603	DLAT	2.94159	1.1705
28.0785	28.3422	28.3149	29.329	29.4818	29.4302			+	SS18-SSX2_GFP	12	13185000000	3.60048	0.00205638	1.16847	1.0671	RPLP0	3.60048	1.16847
23.1766	23.1562	23.2829	24.6307	24.4223	24.0679			+	SS18-SSX2_GFP	3	347810000	2.63995	0.00324159	1.16841	0.999587	WDR5	2.63995	1.16841
25.4788	25.3564	25.5904	26.7111	26.6562	26.5623			+	SS18-SSX2_GFP	13	1852500000	3.88566	0.00208754	1.16799	1.08114	PABPC4	3.88566	1.16799
22.8303	23.485	22.517	24.182	24.1298	24.0118			+	SS18-SSX2_GFP	4	389720000	1.79906	0.010244	1.16372	0.902402	HTATSF1	1.79906	1.16372
22.0422	25.0155	24.8608	25.03	25.0909	25.286					2	768920000	0.527919	0.097403	1.1628	0.590424	EXOSC1	0.527919	1.1628
23.8186	21.9952	22.2712	23.6726	23.9475	23.9485			+	SS18-SSX2_GFP	3	272830000	0.945119	0.0342185	1.16123	0.737378	WIZ	0.945119	1.16123
25.6655	25.4039	25.5078	26.6775	26.7902	26.5895			+	SS18-SSX2_GFP	12	2265100000	3.57569	0.00242623	1.15998	1.05868	VCP	3.57569	1.15998
23.2837	23.2526	23.3928	24.3815	24.6367	24.3742			+	SS18-SSX2_GFP	5	457960000	3.55816	0.0024065	1.15445	1.05312	SMC1A	3.55816	1.15445
23.5754	23.3163	22.8327	24.4083	24.5423	24.2195			+	SS18-SSX2_GFP	4	380110000	2.07823	0.00714163	1.14856	0.928569	TFRC	2.07823	1.14856
30.5864	30.4935	30.7102	31.7346	31.8264	31.6742			+	SS18-SSX2_GFP	94	70522000000	3.93365	0.00205298	1.14836	1.06646	SNRNP200	3.93365	1.14836
24.6795	24.6091	24.4828	25.6921	25.4245	26.0934			+	SS18-SSX2_GFP	4	1124700000	2.31704	0.00516716	1.1462	0.953028	CDC42	2.31704	1.1462
25.9096	25.8999	26.24	27.2711	27.1023	27.1146			+	SS18-SSX2_GFP	5	2692600000	3.1144	0.00280811	1.14614	1.01944	CAPRIN1	3.1144	1.14614
23.4151	23.1486	23.2584	24.0724	24.7471	24.4383			+	SS18-SSX2_GFP	7	529700000	2.26181	0.00601744	1.14524	0.946653	KDM1A	2.26181	1.14524
24.7539	24.4913	24.8645	25.4328	26.1937	25.9174			+	SS18-SSX2_GFP	10	1377900000	2.00142	0.00848295	1.14475	0.916974	IPO5	2.00142	1.14475
25.6283	25.6246	25.5689	26.4718	26.8307	26.9509			+	SS18-SSX2_GFP	13	2199200000	2.85289	0.00323664	1.14392	0.998886	NUP155	2.85289	1.14392
25.219	25.579	25.2147	26.4104	26.5468	26.4864			+	SS18-SSX2_GFP	9	1755900000	3.07451	0.00296594	1.14364	1.01475	TPR	3.07451	1.14364
23.4592	22.9877	22.067	23.7341	24.1815	24.0256			+	SS18-SSX2_GFP	3	366920000	1.24925	0.0234874	1.14244	0.799286	DNAJC13	1.24925	1.14244
29.5953	29.7025	29.6806	30.816	30.788	30.8012			+	SS18-SSX2_GFP	40	38042000000	5.34478	0.00182332	1.1423	1.10506	EFTUD2	5.34478	1.1423
27.6543	27.5031	27.4158	28.6519	28.7568	28.5858			+	SS18-SSX2_GFP	14	9671300000	3.73557	0.0023871	1.14043	1.05046	LBR	3.73557	1.14043
23.3857	23.2325	23.1848	24.5495	24.4022	24.2714			+	SS18-SSX2_GFP	2	436270000	3.46076	0.00236422	1.13996	1.03573	MRPS35	3.46076	1.13996
22.7478	22.2144	25.01	21.9823	25.6327	25.7763					2	684510000	0.308038	0.229828	1.13964	0.45432	TSPO	0.308038	1.13964
21.5251	23.5713	23.5483	24.2341	24.148	23.6656					2	322080000	0.742505	0.0555945	1.13429	0.666859	EXOSC2	0.742505	1.13429
25.9873	26.6856	26.8758	27.5996	27.6493	27.6933			+	SS18-SSX2_GFP	22	4288000000	1.85175	0.0120553	1.13114	0.889634	MYO1B	1.85175	1.13114
25.7374	25.3662	25.665	26.5434	26.8109	26.8037			+	SS18-SSX2_GFP	13	2161600000	2.84948	0.00372727	1.12979	0.987842	NUP160	2.84948	1.12979
24.9707	26.0026	22.7351	25.8188	25.7414	25.5196					6	1309400000	0.508007	0.111378	1.12381	0.570888	AURKB	0.508007	1.12381
28.6187	28.6358	28.9014	29.8942	29.8591	29.7688			+	SS18-SSX2_GFP	16	15252000000	3.4645	0.00282132	1.1221	1.02117	GNAI2	3.4645	1.1221
25.5033	25.5153	25.4563	26.5113	26.7782	26.5281			+	SS18-SSX2_GFP	9	1771700000	3.64643	0.00283465	1.11423	1.02395	ABCF1	3.64643	1.11423
23.5019	23.3219	22.664	24.2634	24.4023	24.1593			+	SS18-SSX2_GFP	4	321850000	1.86703	0.0128803	1.11237	0.879903	RHOT1	1.86703	1.11237
23.7975	22.9228	22.5815	24.2473	24.3443	24.0413			+	SS18-SSX2_GFP	3	252390000	1.38878	0.0212893	1.11039	0.808749	FAM98A	1.38878	1.11039
27.2333	27.3325	27.2357	28.4859	28.4432	28.1946			+	SS18-SSX2_GFP	11	7817400000	3.48274	0.00312615	1.10743	1.00997	YWHAE	3.48274	1.10743
26.5154	26.2929	26.4744	27.4767	27.5694	27.5502			+	SS18-SSX2_GFP	10	3661400000	3.93071	0.00271111	1.10456	1.02846	SRSF9	3.93071	1.10456
24.8844	24.3493	24.3547	25.462	26.1199	25.3194			+	SS18-SSX2_GFP	6	1322000000	1.65648	0.0153351	1.10426	0.846985	KIAA1671	1.65648	1.10426
27.9806	28.106	28.1187	29.2135	29.1745	29.1281			+	SS18-SSX2_GFP	7	10844000000	4.58488	0.00239095	1.10357	1.05049	SRSF2	4.58488	1.10357
21.0994	23.0898	23.1838	23.2048	23.8287	23.6324					3	240300000	0.712032	0.0656952	1.09762	0.64407	EIF4G2	0.712032	1.09762
26.1866	26.0946	24.9008	26.8191	26.7524	26.899			+	SS18-SSX2_GFP	21	2868300000	1.23661	0.0273835	1.09616	0.773964	POLR2A	1.23661	1.09616
23.1889	22.7575	21.3824	23.7864	23.3965	23.4259			+	SS18-SSX2_GFP	3	199030000	0.913252	0.0425794	1.09328	0.701303	SPEN	0.913252	1.09328
22.989	22.5797	22.596	23.568	24.2866	23.585			+	SS18-SSX2_GFP	4	268460000	1.79752	0.0147527	1.09161	0.858233	NCAPD2	1.79752	1.09161
23.0199	22.8928	23.3203	24.2985	24.1397	24.0691			+	SS18-SSX2_GFP	3	321370000	2.79202	0.00502941	1.09143	0.954256	PFKL	2.79202	1.09143
28.36	28.3865	28.2131	29.4024	29.4506	29.3765			+	SS18-SSX2_GFP	19	13553000000	4.32203	0.00252229	1.08997	1.03009	HNRNPR	4.32203	1.08997
26.341	26.3937	25.5749	27.1526	27.1689	27.2492			+	SS18-SSX2_GFP	7	3026100000	1.82192	0.0147925	1.08705	0.858463	NDUFB9	1.82192	1.08705
22.7105	22.3858	22.7334	23.7047	23.7479	23.6342			+	SS18-SSX2_GFP	2	264110000	3.12429	0.00411343	1.08571	0.971955	NCOA5	3.12429	1.08571
25.8666	22.8464	25.6024	25.8966	25.7706	25.9007					10	1143800000	0.488351	0.124185	1.08419	0.55128	TPM1	0.488351	1.08419
28.0276	28.026	28.0637	29.08	29.057	29.221			+	SS18-SSX2_GFP	6	9487400000	4.47473	0.0028481	1.08025	1.02614	RPL27	4.47473	1.08025
22.5572	22.5991	22.52	24.0812	24.0897	22.7452			+	SS18-SSX2_GFP	2	430830000	1.13534	0.0316377	1.07998	0.746174	LARP4	1.13534	1.07998
22.9593	23.0456	23.7123	24.394	23.971	24.5887			+	SS18-SSX2_GFP	1	452230000	1.64242	0.0177047	1.0788	0.83	SCOC	1.64242	1.0788
23.1203	23.5583	23.3577	24.4974	24.3082	24.4658			+	SS18-SSX2_GFP	5	360680000	2.8221	0.00600871	1.07837	0.946392	WTAP	2.8221	1.07837
27.0074	26.9077	26.6806	28.0325	27.9914	27.8037			+	SS18-SSX2_GFP	10	4780400000	3.07451	0.00456889	1.07727	0.962156	IK	3.07451	1.07727
23.8355	23.6984	24.0649	25.0011	25.1597	24.6336			+	SS18-SSX2_GFP	5	659450000	2.31211	0.0111832	1.06522	0.895925	IGF2BP1	2.31211	1.06522
24.3142	24.85	22.7507	24.9415	25.0542	25.1079					4	720010000	0.77543	0.061713	1.06292	0.651436	IPO7	0.77543	1.06292
27.226	27.2881	27.4589	28.4131	28.4432	28.2933			+	SS18-SSX2_GFP	28	6502700000	3.65543	0.004	1.05887	0.97741	TJP1	3.65543	1.05887
25.502	25.5069	25.1555	26.3961	26.5662	26.3784			+	SS18-SSX2_GFP	10	2000400000	2.89734	0.00689177	1.05875	0.936274	HDAC2	2.89734	1.05875
24.5584	22.5481	24.5472	24.8088	24.8955	25.1193					3	636330000	0.715927	0.0724972	1.05663	0.630973	NUP214	0.715927	1.05663
27.885	28.1242	27.3108	29.0843	28.6009	28.8016			+	SS18-SSX2_GFP	5	8378500000	1.71209	0.0180439	1.05562	0.825264	RPL14	1.71209	1.05562
25.5352	25.5238	25.7082	26.8067	26.5649	26.5607			+	SS18-SSX2_GFP	11	1932300000	3.32588	0.0050517	1.05503	0.95836	TBL3	3.32588	1.05503
21.9865	23.1922	21.6526	23.413	23.4371	23.1448			+	SS18-SSX2_GFP	3	215740000	1.03867	0.0395077	1.05456	0.714052	MRPL17	1.03867	1.05456
23.7963	24.2588	23.8802	25.2913	25.2567	24.5496			+	SS18-SSX2_GFP	4	650400000	1.70345	0.0188093	1.05413	0.823254	LUZP1	1.70345	1.05413
25.3417	25.4164	25.3261	26.3418	26.5249	26.3756			+	SS18-SSX2_GFP	3	1630300000	4.13002	0.00373293	1.0527	0.990515	RAB5C	4.13002	1.0527
25.2948	25.0249	25.3468	26.0397	26.0887	26.6954			+	SS18-SSX2_GFP	16	2128200000	1.96946	0.015319	1.05242	0.85335	TFIP11	1.96946	1.05242
26.2723	26.0665	26.1088	27.2963	27.0549	27.2322			+	SS18-SSX2_GFP	8	3138800000	3.39951	0.00502203	1.04525	0.953985	HNRNPAB	3.39951	1.04525
22.9507	22.1787	22.5375	23.5151	23.4887	23.7977			+	SS18-SSX2_GFP	1	272570000	1.89204	0.0162053	1.04484	0.83992	SGF29	1.89204	1.04484
24.959	24.9315	24.8125	25.9332	26.1939	25.7038			+	SS18-SSX2_GFP	7	1455300000	2.66383	0.00948523	1.04263	0.907802	RFC1	2.66383	1.04263
26.1485	26.0233	26.2478	27.103	27.3526	27.085			+	SS18-SSX2_GFP	12	3289300000	3.18633	0.00676122	1.04034	0.938876	GNAS	3.18633	1.04034
25.2802	22.6684	24.9407	25.3646	25.185	25.4437					9	865840000	0.55704	0.112568	1.03467	0.567425	YWHAZ	0.55704	1.03467
26.519	26.0761	26.2307	27.4976	27.2421	27.1814			+	SS18-SSX2_GFP	10	3243100000	2.50671	0.0120387	1.03178	0.887959	BCAS2	2.50671	1.03178
23.5485	23.9986	24.5959	25.2262	25.1095	24.8986			+	SS18-SSX2_GFP	9	714640000	1.49881	0.0259876	1.03041	0.781711	DDX24	1.49881	1.03041
22.5411	23.6063	22.5591	24.0036	24.26	23.5092			+	SS18-SSX2_GFP	2	294090000	1.15719	0.0380714	1.0221	0.72215	ATP6V1E1	1.15719	1.0221
25.2713	22.1313	25.7715	25.3931	25.4907	25.3524					5	875040000	0.375519	0.197292	1.02069	0.476971	COX6B1	0.375519	1.02069
27.8174	27.7497	27.9053	29.0537	28.6647	28.8147			+	SS18-SSX2_GFP	13	8539900000	2.95297	0.00936723	1.02023	0.909387	RPL5	2.95297	1.02023
24.6445	24.5698	24.0578	25.3223	25.5125	25.4726			+	SS18-SSX2_GFP	6	987960000	2.19649	0.015376	1.01179	0.84792	COPB1	2.19649	1.01179
25.1055	24.867	24.7997	26.1657	25.8629	25.7777			+	SS18-SSX2_GFP	7	1372800000	2.59912	0.0130055	1.01134	0.879487	ACAD9	2.59912	1.01134
25.6158	26.1844	26.0547	26.8008	27.1302	26.9573			+	SS18-SSX2_GFP	7	2584400000	2.16914	0.0154589	1.01108	0.844985	EIF3M	2.16914	1.01108
23.6709	23.011	21.8849	23.7895	23.9572	23.8507					2	291050000	0.899813	0.0567392	1.01026	0.663033	SEC61G	0.899813	1.01026
28.5033	28.4468	28.4395	29.4032	29.5131	29.5032			+	SS18-SSX2_GFP	27	13624000000	4.8148	0.00426786	1.00996	0.970669	DDX23	4.8148	1.00996
27.6259	27.2896	27.9191	28.8398	28.4926	28.5263			+	SS18-SSX2_GFP	21	7822200000	2.04294	0.0173506	1.00809	0.831194	CALD1	2.04294	1.00809
28.9164	29.0783	28.9123	30.1263	29.7503	30.0518			+	SS18-SSX2_GFP	14	17262000000	2.86014	0.0115216	1.00718	0.893459	RPL15	2.86014	1.00718
28.0321	28.1315	28.1284	29.1244	29.0735	29.1128			+	SS18-SSX2_GFP	30	12626000000	5.00667	0.00427422	1.0062	0.971149	SUPT16H	5.00667	1.0062
24.3874	21.9012	24.4689	24.4588	24.6564	24.6593					5	537970000	0.523022	0.130018	1.0057	0.545027	FASN	0.523022	1.0057
26.4957	26.4599	26.7265	27.9434	26.99	27.7537			+	SS18-SSX2_GFP	4	2846400000	1.52569	0.0287813	1.00161	0.768635	RPL34	1.52569	1.00161
21.7842	24.3482	24.3951	24.5027	24.3436	24.6614					8	551070000	0.500333	0.143209	0.993414	0.531962	GATAD2A	0.500333	0.993414
25.4222	25.6363	25.4205	26.5503	26.5525	26.3542			+	SS18-SSX2_GFP	11	2264800000	3.28501	0.0101124	0.992645	0.904678	NCBP1	3.28501	0.992645
29.0487	29.0468	28.9473	30.0844	29.9151	30.001			+	SS18-SSX2_GFP	42	15035000000	4.11741	0.00717241	0.985911	0.930781	AMOT	4.11741	0.985911
24.1008	23.7802	23.2272	24.5016	24.6441	24.9187			+	SS18-SSX2_GFP	5	502030000	1.59686	0.0288982	0.98546	0.768091	NDUFA7	1.59686	0.98546
29.619	29.5369	29.519	30.4545	30.5433	30.6287			+	SS18-SSX2_GFP	41	28939000000	4.12164	0.00715186	0.983899	0.929116	IMMT	4.12164	0.983899
26.4723	26.5098	26.6337	27.4874	27.6459	27.4301			+	SS18-SSX2_GFP	6	3834700000	3.5791	0.00935402	0.982496	0.908974	ATP5L	3.5791	0.982496
22.8812	22.9978	23.0715	23.9578	24.4266	23.4981			+	SS18-SSX2_GFP	2	354320000	1.63162	0.0291569	0.977376	0.767353	P4HB	1.63162	0.977376
27.1585	27.365	26.8693	28.4465	28.0498	27.8159			+	SS18-SSX2_GFP	4	4303100000	1.85181	0.0254595	0.973173	0.788921	RPL36	1.85181	0.973173
24.5803	24.4093	24.9471	25.7417	25.5788	25.5311			+	SS18-SSX2_GFP	5	1018800000	2.32499	0.0176818	0.971683	0.829811	KIF2A	2.32499	0.971683
26.5952	27.2124	27.1003	28.1231	27.9042	27.7855			+	SS18-SSX2_GFP	26	4852900000	1.97356	0.02351	0.968266	0.797557	MYO6	1.97356	0.968266
23.1256	23.5315	23.1679	24.1351	24.2379	24.3552			+	SS18-SSX2_GFP	2	308390000	2.59683	0.0154794	0.967751	0.846189	MRPL3	2.59683	0.967751
23.2633	23.218	23.4922	24.2868	24.294	24.2929			+	SS18-SSX2_GFP	4	401160000	3.46976	0.0118061	0.96678	0.891133	VEZF1	3.46976	0.96678
24.8075	25.0891	25.6912	26.1123	26.4339	25.9407			+	SS18-SSX2_GFP	7	1606600000	1.50044	0.0319904	0.966386	0.744513	PPP1R10	1.50044	0.966386
24.6532	24.6328	24.5941	25.4993	25.8148	25.45			+	SS18-SSX2_GFP	6	1047800000	2.94245	0.0147118	0.961318	0.861717	PRMT5	2.94245	0.961318
24.59	23.4912	22.069	24.3897	24.3416	24.2998					4	463900000	0.587087	0.121192	0.960349	0.555053	SUGP2	0.587087	0.960349
25.8927	25.6572	23.71	26.4399	25.9427	25.7524					9	1289500000	0.593905	0.11986	0.958363	0.556738	ANAPC7	0.593905	0.958363
24.788	24.7419	24.7711	25.6361	25.944	25.586			+	SS18-SSX2_GFP	4	904980000	2.97311	0.0147725	0.955026	0.858276	LIG3	2.97311	0.955026
26.6795	26.5291	26.5555	27.3884	27.7715	27.4679			+	SS18-SSX2_GFP	6	3953100000	2.7934	0.0153965	0.954557	0.84803	SNRPF	2.7934	0.954557
22.9896	22.9841	22.3375	23.7039	23.7695	23.7013			+	SS18-SSX2_GFP	5	321200000	1.92738	0.0257519	0.9545	0.783901	CKAP5	1.92738	0.9545
25.7512	26.0306	26.2032	26.8976	27.1294	26.8199			+	SS18-SSX2_GFP	16	2423300000	2.38906	0.0187851	0.953948	0.821527	PPP1CC	2.38906	0.953948
28.8064	28.7602	28.8296	29.7099	29.864	29.6805			+	SS18-SSX2_GFP	13	15587000000	4.02323	0.0107395	0.952718	0.898396	RPL10A	4.02323	0.952718
25.6561	21.9392	25.5098	25.375	25.2397	25.3459					9	923020000	0.321009	0.267467	0.951832	0.429526	LMO7	0.321009	0.951832
26.5714	26.7393	27.1317	27.6987	27.754	27.8345			+	SS18-SSX2_GFP	26	4533800000	2.28963	0.0207471	0.948258	0.810034	EIF3A	2.28963	0.948258
22.8929	23.2398	23.166	23.8637	24.0124	24.2671			+	SS18-SSX2_GFP	6	422290000	2.40992	0.0192298	0.948198	0.818733	NCKAP1	2.40992	0.948198
27.5737	27.6362	27.7362	28.3041	28.5538	28.926			+	SS18-SSX2_GFP	10	7296700000	2.14509	0.0235955	0.94594	0.797056	RPL28	2.14509	0.94594
26.4599	26.2871	26.3078	27.1815	27.3741	27.3205			+	SS18-SSX2_GFP	13	3689800000	3.54195	0.013932	0.940442	0.871478	TPX2	3.54195	0.940442
30.8481	30.7106	30.7838	31.7569	31.7509	31.6501			+	SS18-SSX2_GFP	103	70408000000	4.23417	0.0116782	0.938492	0.89153	PRPF8	4.23417	0.938492
24.3927	24.1844	24.6036	25.2136	25.481	25.2998			+	SS18-SSX2_GFP	7	1016700000	2.53759	0.0190797	0.937894	0.819532	AQR	2.53759	0.937894
21.4584	23.373	22.9598	23.496	23.6132	23.4956					2	211550000	0.737566	0.0958335	0.937818	0.592426	KIF2C	0.737566	0.937818
28.4499	28.4522	28.2238	29.4441	29.3408	29.1422			+	SS18-SSX2_GFP	5	12110000000	2.88041	0.0167077	0.933713	0.836245	RPS15A	2.88041	0.933713
21.3091	22.6856	22.7161	23.3481	23.043	23.1203					2	170380000	0.922118	0.0712415	0.933528	0.633781	UTP4	0.922118	0.933528
28.8038	28.9633	28.8603	29.9852	29.6508	29.7909			+	SS18-SSX2_GFP	8	14832000000	3.01169	0.0157569	0.933173	0.842503	RPL18	3.01169	0.933173
23.0203	22.2777	23.7534	23.9449	24.0763	23.8294					2	288900000	1.01381	0.0617823	0.933044	0.651599	MKRN2	1.01381	0.933044
23.6729	23.683	22.825	24.3572	24.2525	24.3703			+	SS18-SSX2_GFP	3	433080000	1.50479	0.0371756	0.933043	0.725092	CAPZA2	1.50479	0.933043
25.253	25.6645	25.5806	26.3507	26.6565	26.2898			+	SS18-SSX2_GFP	16	2024600000	2.27705	0.0235394	0.932915	0.797889	PBRM1	2.27705	0.932915
26.2488	25.7516	26.3928	26.9712	27.1765	27.0388			+	SS18-SSX2_GFP	4	2849100000	1.99123	0.027601	0.931081	0.773701	LSM4	1.99123	0.931081
23.529	22.4918	22.9898	23.8036	24.0712	23.9198			+	SS18-SSX2_GFP	3	291540000	1.39853	0.04147	0.928001	0.708754	SLC4A7	1.39853	0.928001
30.033	29.8737	29.8354	30.8576	30.8361	30.8287			+	SS18-SSX2_GFP	46	37112000000	3.95713	0.0138659	0.926818	0.87342	DHX9	3.95713	0.926818
26.0429	25.6651	25.6786	26.7128	26.8096	26.6414			+	SS18-SSX2_GFP	6	2136800000	2.65009	0.0195857	0.925735	0.817076	TARDBP	2.65009	0.925735
27.8362	27.7249	27.7715	28.7463	28.7116	28.6505			+	SS18-SSX2_GFP	10	7084600000	4.57068	0.0120221	0.925309	0.8874	RPL13A	4.57068	0.925309
28.5304	28.584	28.7076	29.5285	29.5948	29.4592			+	SS18-SSX2_GFP	8	13107000000	3.82771	0.0146323	0.920139	0.863602	RPS12	3.82771	0.920139
27.0763	26.9672	27.0421	27.8394	28.0047	27.9993			+	SS18-SSX2_GFP	22	4841000000	3.88981	0.0146522	0.91928	0.864739	WDR6	3.88981	0.91928
29.2711	29.2037	29.3118	30.133	30.243	30.1587			+	SS18-SSX2_GFP	13	21877000000	4.43333	0.0135562	0.915966	0.875857	SLC25A3	4.43333	0.915966
29.0585	29.0587	28.8812	29.9271	29.8848	29.9344			+	SS18-SSX2_GFP	27	18491000000	3.93741	0.0146125	0.915931	0.863176	ATAD3A	3.93741	0.915931
23.5544	22.7265	23.8053	24.1489	24.4978	24.185					5	386060000	1.2482	0.0500987	0.915182	0.680825	STAG2	1.2482	0.915182
27.4549	27.5028	27.6402	28.5062	28.3911	28.4436			+	SS18-SSX2_GFP	15	7524300000	3.83623	0.0148124	0.914356	0.858767	USP39	3.83623	0.914356
22.7177	21.9214	23.5404	23.4188	23.9203	23.5725					3	240380000	0.86384	0.0843978	0.910743	0.611093	KCTD12	0.86384	0.910743
25.1737	24.8325	24.7523	25.8053	25.6382	26.0435			+	SS18-SSX2_GFP	11	1394700000	2.18801	0.0272889	0.909493	0.774249	DDX42	2.18801	0.909493
28.341	28.423	28.3193	29.3611	29.2025	29.2472			+	SS18-SSX2_GFP	4	10135000000	4.05027	0.0146919	0.909139	0.860277	RPS20	4.05027	0.909139
24.7488	23.551	21.9182	23.8777	24.5492	24.5086					5	417800000	0.461007	0.184587	0.905845	0.490003	CLTA	0.461007	0.905845
29.7545	29.5681	29.4646	30.5008	30.5394	30.4566			+	SS18-SSX2_GFP	33	45485000000	3.2912	0.0177276	0.90321	0.830042	XRCC5	3.2912	0.90321
29.4763	29.2879	29.3009	30.324	30.2233	30.2131			+	SS18-SSX2_GFP	19	21795000000	3.66601	0.016184	0.898445	0.839449	RPS3	3.66601	0.898445
23.1384	23.0327	23.9943	24.6637	24.0682	24.128					2	343020000	1.17787	0.0574689	0.898153	0.661131	NUP50	1.17787	0.898153
29.8696	29.9369	29.8928	30.9181	30.6813	30.7921			+	SS18-SSX2_GFP	13	36982000000	3.64164	0.0162782	0.897371	0.837719	NPM1	3.64164	0.897371
21.5217	22.9707	23.2798	23.368	23.5192	23.5743					3	209600000	0.755429	0.10522	0.896423	0.580049	PDCD6IP	0.755429	0.896423
24.1499	22.7559	22.969	23.8032	24.5846	24.1749					4	385130000	0.851718	0.0895579	0.895988	0.601842	SPECC1	0.851718	0.895988
24.2948	23.6066	24.5669	24.8874	25.223	25.0425			+	SS18-SSX2_GFP	6	789200000	1.38382	0.0474596	0.894864	0.687436	PELP1	1.38382	0.894864
29.0065	29.0293	28.9325	29.9905	29.8328	29.8237			+	SS18-SSX2_GFP	18	17372000000	3.88206	0.0159947	0.892897	0.841134	RACK1	3.88206	0.892897
26.4337	25.9753	26.5105	27.2356	27.4714	26.8712			+	SS18-SSX2_GFP	17	3311600000	1.66862	0.0401277	0.886185	0.713708	POLR2B	1.66862	0.886185
26.2435	26.1469	26.149	26.9867	27.0551	27.1475			+	SS18-SSX2_GFP	19	2813000000	4.0117	0.0166859	0.883323	0.836132	XRN2	4.0117	0.883323
22.0588	22.2284	22.5031	23.2176	23.2989	22.9038			+	SS18-SSX2_GFP	2	163580000	2.11238	0.032029	0.876633	0.744909	NKX2-5	2.11238	0.876633
26.2869	25.2466	26.3992	26.8755	26.7979	26.8843					11	2958100000	1.11832	0.0676726	0.874959	0.639621	HDAC1	1.11832	0.874959
28.8512	28.9307	29.0166	29.7876	29.7961	29.8365			+	SS18-SSX2_GFP	16	16062000000	4.19917	0.0172604	0.873888	0.832227	RPS2	4.19917	0.873888
26.9416	26.96	26.7867	27.7969	27.6881	27.8241			+	SS18-SSX2_GFP	11	4125900000	3.65205	0.0196108	0.87364	0.817325	ERLIN2	3.65205	0.87364
27.7311	27.8528	27.762	28.7091	28.7117	28.5418			+	SS18-SSX2_GFP	37	9407000000	3.69656	0.0194872	0.872246	0.817462	IQGAP1	3.69656	0.872246
27.8963	28.115	27.9549	28.859	28.8816	28.8384			+	SS18-SSX2_GFP	18	9356100000	3.70622	0.0197092	0.870937	0.816601	PABPC1	3.70622	0.870937
22.5624	23.1732	23.1619	23.7258	24.0209	23.7624			+	SS18-SSX2_GFP	2	233480000	1.76306	0.0406281	0.870522	0.712314	MRPS6	1.76306	0.870522
26.9324	26.846	26.6701	27.7144	27.7356	27.6022			+	SS18-SSX2_GFP	11	4129700000	3.23505	0.0235689	0.867907	0.798017	DKC1	3.23505	0.867907
26.0347	25.4258	26.1294	26.7451	26.795	26.6455			+	SS18-SSX2_GFP	14	2261300000	1.73727	0.0420633	0.865252	0.706458	NUP133	1.73727	0.865252
22.0576	23.2891	21.4172	23.0188	23.1968	23.1429					2	160670000	0.716488	0.119612	0.864862	0.557334	WDR43	0.716488	0.864862
25.958	25.1312	25.5207	26.4833	26.5144	26.2057			+	SS18-SSX2_GFP	9	2105600000	1.5434	0.0478247	0.864494	0.687091	PAXBP1	1.5434	0.864494
29.1197	28.9396	28.9175	29.8451	29.9018	29.8144			+	SS18-SSX2_GFP	66	17822000000	3.62678	0.022197	0.861526	0.805946	MYH9	3.62678	0.861526
26.4099	26.2714	25.9813	27.1937	26.9965	27.0569			+	SS18-SSX2_GFP	10	2784200000	2.46139	0.0298929	0.86151	0.7563	SF3A2	2.46139	0.86151
22.5481	23.5938	23.2199	24.4169	23.8651	23.6428					5	257200000	1.04852	0.0785229	0.854329	0.617828	PRRC2C	1.04852	0.854329
28.678	27.8961	28.4614	29.6969	28.9765	28.9184					3	12043000000	1.17117	0.0705459	0.852051	0.634874	SNRPD3	1.17117	0.852051
28.0979	28.0924	28.2601	28.9515	29.1104	28.9335			+	SS18-SSX2_GFP	55	10347000000	3.3777	0.0257065	0.848292	0.786438	AHNAK	3.3777	0.848292
23.5728	23.8613	24.0416	24.6886	24.4912	24.8384			+	SS18-SSX2_GFP	7	478580000	2.12497	0.0371313	0.847536	0.724659	TBL2	2.12497	0.847536
26.0807	25.7238	25.8692	26.741	26.7806	26.6867			+	SS18-SSX2_GFP	5	2322500000	2.85443	0.0292927	0.844836	0.763084	ALYREF	2.85443	0.844836
26.7794	26.8755	26.8075	27.6529	27.7301	27.6099			+	SS18-SSX2_GFP	16	4202800000	4.31032	0.0221114	0.843486	0.806937	WDR3	4.31032	0.843486
22.2776	24.4456	22.2907	23.8279	23.9132	23.8023					4	364350000	0.512447	0.184405	0.843196	0.489872	PI4KA	0.512447	0.843196
24.1085	22.9981	23.808	24.4705	24.7443	24.2187					7	448050000	1.08233	0.0815348	0.839593	0.615231	INA	1.08233	0.839593
21.4359	22.7551	23.2273	23.2714	23.4827	23.1823					3	185090000	0.704824	0.130544	0.839355	0.543834	XPOT	0.704824	0.839355
22.8686	22.6769	22.4451	23.4144	23.6044	23.4743			+	SS18-SSX2_GFP	3	230750000	2.46181	0.0344892	0.834182	0.73518	XPO5	2.46181	0.834182
29.1042	29.0687	28.9939	29.8156	29.8806	29.9671			+	SS18-SSX2_GFP	14	16015000000	3.96625	0.0254913	0.832107	0.789028	RPL6	3.96625	0.832107
25.9434	26.1276	26.3604	26.9087	27.1329	26.8586			+	SS18-SSX2_GFP	18	2456700000	2.29929	0.0389074	0.822996	0.717401	NUP205	2.29929	0.822996
24.3422	23.3182	24.4535	24.9035	24.8043	24.8713					3	667330000	1.06542	0.0892	0.821761	0.603129	SAP30BP	1.06542	0.821761
27.3116	27.2828	27.3335	28.134	28.2748	27.969			+	SS18-SSX2_GFP	18	5862400000	3.09529	0.0315884	0.816681	0.749538	KPNB1	3.09529	0.816681
26.9461	26.9497	26.7724	27.7274	27.716	27.6716			+	SS18-SSX2_GFP	12	3960300000	3.7441	0.0288167	0.81559	0.768742	NDUFA10	3.7441	0.81559
25.5935	24.9566	25.0099	25.8257	26.1299	26.0477					8	1407000000	1.66102	0.0557907	0.814415	0.665751	EIF3C	1.66102	0.814415
21.8541	23.272	23.3279	23.3969	23.5946	23.8922					3	237120000	0.737927	0.137162	0.80989	0.538755	BCOR	0.737927	0.80989
25.812	26.0061	25.8779	26.5035	26.9049	26.7069			+	SS18-SSX2_GFP	11	2172600000	2.47476	0.0395545	0.806456	0.714222	CTR9	2.47476	0.806456
22.2035	23.1583	23.0644	23.6657	23.7059	23.4712					4	357070000	1.21191	0.082321	0.805525	0.613811	BRD1	1.21191	0.805525
21.52	24.2462	23.1125	23.7889	24.0812	23.4245					3	278400000	0.422395	0.244508	0.805278	0.444122	DHX38	0.422395	0.805278
27.6069	27.71	27.6417	28.4286	28.5795	28.3646			+	SS18-SSX2_GFP	21	7957700000	3.47231	0.0311543	0.804677	0.751649	HSPD1	3.47231	0.804677
23.419	22.7763	23.7642	23.8508	24.1676	24.3502					5	401460000	1.1649	0.087784	0.803023	0.606445	HEATR1	1.1649	0.803023
27.4253	27.1354	26.9814	28.1822	27.7796	27.987			+	SS18-SSX2_GFP	4	5002300000	1.99785	0.0494483	0.802256	0.683064	SNRPD1	1.99785	0.802256
23.274	23.6403	23.0476	23.8804	24.4765	24.011					4	318360000	1.48546	0.0668647	0.801968	0.641517	MRPL47	1.48546	0.801968
25.639	25.0801	24.5421	25.9514	25.9601	25.7549					12	1132200000	1.1648	0.0881812	0.80172	0.605688	NUP98	1.1648	0.80172
23.03	23.3829	24.3262	24.2248	24.3381	24.5765					2	259780000	0.933918	0.111243	0.800123	0.571295	PEX14	0.933918	0.800123
23.2112	23.9582	22.5361	24.0153	24.0797	24.0069					4	283630000	0.906199	0.113496	0.798788	0.565976	CYB5R1	0.906199	0.798788
28.5818	28.7733	28.456	29.0735	29.4197	29.7078					9	12504000000	1.74888	0.0574041	0.796656	0.660972	RPL13	1.74888	0.796656
29.3717	29.4482	29.4336	30.239	30.1565	30.2303			+	SS18-SSX2_GFP	74	24047000000	4.63725	0.0293643	0.790785	0.763951	NUMA1	4.63725	0.790785
23.3734	23.4832	23.4291	24.4505	24.1578	24.0463			+	SS18-SSX2_GFP	4	511570000	2.49807	0.0426292	0.789628	0.702129	ORC5	2.49807	0.789628
26.3637	26.6213	26.648	27.3802	27.2632	27.3456			+	SS18-SSX2_GFP	7	2789400000	2.89684	0.0391317	0.785351	0.715866	EMD	2.89684	0.785351
26.4093	26.0064	26.4936	26.9936	27.2823	26.9774					10	2563800000	1.91169	0.0570328	0.781317	0.662113	0	1.91169	0.781317
24.2024	23.8455	23.8782	24.3468	25.0956	24.8245					7	597390000	1.4672	0.0753217	0.780291	0.625867	USP7	1.4672	0.780291
24.8698	25.1581	24.8787	25.5117	25.981	25.7356					7	1102300000	2.02517	0.0564955	0.77387	0.664094	RBM42	2.02517	0.77387
25.8255	25.8704	26.0624	26.6252	26.7838	26.6588			+	SS18-SSX2_GFP	8	2427400000	3.04138	0.0415041	0.769807	0.708057	THOC6	3.04138	0.769807
28.0939	27.8715	28.1932	28.797	28.9095	28.7584			+	SS18-SSX2_GFP	8	8059500000	2.72682	0.0442274	0.768745	0.695471	MYL12A	2.72682	0.768745
24.2816	22.8569	23.9325	24.2385	24.6483	24.4891					5	508150000	0.797649	0.143307	0.768291	0.531681	FLII	0.797649	0.768291
24.5636	23.8955	22.9127	24.3433	24.6612	24.6598					4	539210000	0.710868	0.160316	0.764168	0.512528	EED	0.710868	0.764168
22.7647	23.7429	22.3389	23.705	23.6487	23.7824					2	255310000	0.849222	0.13721	0.763194	0.538434	CCDC86	0.849222	0.763194
29.7273	29.6542	29.775	30.6371	30.3998	30.4071			+	SS18-SSX2_GFP	29	31252000000	3.05909	0.0426792	0.76248	0.702444	NONO	3.05909	0.76248
28.1301	27.9209	28.1816	29.0018	28.8181	28.6903					22	9235400000	2.48862	0.0517251	0.759224	0.677558	CDC5L	2.48862	0.759224
22.6333	22.0974	22.0912	22.9599	23.2933	22.8237					2	125270000	1.52582	0.0833196	0.751689	0.612399	MOV10	1.52582	0.751689
27.0648	26.7723	26.6371	27.6188	27.6117	27.4812					14	3950100000	2.29331	0.0585586	0.745811	0.657743	FLOT2	2.29331	0.745811
23.4806	23.7089	23.8283	24.3796	24.548	24.3244					4	462670000	2.43589	0.0565585	0.744713	0.663627	SMPD4	2.43589	0.744713
24.7254	25.0114	24.9754	25.9997	25.925	25.0181					9	1369800000	1.06518	0.118398	0.743516	0.559854	KIF23	1.06518	0.743516
23.2873	22.2284	22.3646	23.302	23.5268	23.2744					2	251450000	1.01667	0.123531	0.740948	0.552092	PSMD8	1.01667	0.740948
27.1448	27.2175	27.316	27.956	28.0349	27.909			+	SS18-SSX2_GFP	25	4933900000	3.55864	0.0437302	0.740519	0.697483	TJP2	3.55864	0.740519
25.3043	23.3981	25.2053	25.124	25.4053	25.5779					4	939270000	0.506494	0.237715	0.73321	0.448851	AIF1L	0.506494	0.73321
28.4581	28.6334	28.4484	29.2558	29.223	29.2517			+	SS18-SSX2_GFP	12	12492000000	3.55426	0.0471306	0.730171	0.688194	ILF2	3.55426	0.730171
22.5219	22.2595	23.3817	23.0565	23.9965	23.2874					2	177050000	0.755769	0.17119	0.72578	0.503517	ASH2L	0.755769	0.72578
28.0719	28.4174	28.2188	29.0142	28.9513	28.9136					28	11706000000	2.64427	0.0597169	0.723621	0.655262	CPSF2	2.64427	0.723621
24.4978	24.6462	23.9446	25.2046	24.8954	25.1573					5	839540000	1.43559	0.100939	0.72284	0.585699	LEO1	1.43559	0.72284
25.1492	24.9702	24.9914	25.8222	25.7463	25.7046					9	1134900000	3.39505	0.0519817	0.720757	0.676041	CSE1L	3.39505	0.720757
23.6694	23.9068	24.2394	24.3801	24.911	24.6831					4	596510000	1.47753	0.0995149	0.719589	0.587052	INTS3	1.47753	0.719589
28.3678	28.3022	28.164	28.9888	28.9953	28.9846					9	10324000000	3.53437	0.0539041	0.711568	0.6712	SNRPN	3.53437	0.711568
22.3362	23.0353	22.5036	23.767	23.2922	22.9368					3	178220000	1.03841	0.13961	0.706948	0.535666	ZC3H18	1.03841	0.706948
27.6656	27.5278	27.6986	28.2347	28.8281	27.9482					2	7359600000	1.25427	0.118489	0.70636	0.558676	SNRPE	1.25427	0.70636
28.5125	28.4616	28.3325	29.0811	29.139	29.1987					9	10409000000	3.42652	0.0569683	0.704055	0.662067	RPL9	3.42652	0.704055
24.1589	22.8837	23.1592	24.0955	24.2893	23.9269					7	386450000	0.810991	0.172551	0.703341	0.501923	DHX8	0.810991	0.703341
28.3429	28.2205	28.0825	28.9094	28.8325	29.0024					9	8396800000	2.83368	0.066939	0.699463	0.641814	RPL11	2.83368	0.699463
29.0706	28.8162	28.842	29.5665	29.655	29.6034					37	16626000000	2.92649	0.0656222	0.69869	0.644061	PRPF6	2.92649	0.69869
26.1515	26.0582	26.3042	26.8831	26.9376	26.7788					6	2007300000	2.9045	0.0673843	0.695207	0.640433	EWSR1	2.9045	0.695207
23.8475	21.9949	24.5531	24.0384	24.2815	24.1595					5	378340000	0.381103	0.326509	0.694628	0.393324	MTPAP	0.381103	0.694628
34.7629	34.7367	34.6525	35.4578	35.3306	35.4348					33	945200000000	3.75001	0.0592306	0.690372	0.656618	ACTG1	3.75001	0.690372
23.6422	22.3791	22.7682	23.8376	23.4534	23.5694					2	241600000	0.818812	0.177395	0.690316	0.496479	CD3EAP	0.818812	0.690316
28.2519	28.494	28.5476	29.114	29.2037	29.0447					20	12314000000	2.60387	0.0754042	0.689709	0.625904	TUBB	2.60387	0.689709
28.05	28.1482	28.0868	28.8786	28.7627	28.7102					15	9499100000	3.5585	0.0616439	0.688801	0.651412	SMU1	3.5585	0.688801
29.3413	29.3606	29.5508	30.3393	29.9258	30.0457					25	21445000000	2.09648	0.0896541	0.686028	0.60187	DBN1	2.09648	0.686028
26.4259	26.6014	27.0359	27.3025	27.631	27.1835					15	3764800000	1.41479	0.118611	0.684569	0.558679	CDC73	1.41479	0.684569
28.2921	28.2632	28.4124	29.1604	28.9287	28.9234					18	9389800000	2.77878	0.0755716	0.681568	0.625008	PRPF4	2.77878	0.681568
25.7559	25.8967	25.7588	26.3672	26.8455	26.2249					2	1735400000	1.60102	0.113486	0.675397	0.565957	NDUFS7	1.60102	0.675397
23.1164	23.1168	22.829	23.8527	23.6074	23.6282					3	150650000	2.25891	0.090167	0.675385	0.600908	MRPL15	2.25891	0.675385
24.8918	24.6003	24.7395	25.59	25.5045	25.1423					3	962480000	1.84663	0.107776	0.668418	0.575735	DHCR7	1.84663	0.668418
24.6663	24.7442	24.4447	25.2849	25.322	25.2521					3	847310000	2.71924	0.0839827	0.66792	0.611668	EIF3K	2.71924	0.66792
27.3463	27.3168	27.2981	28.0911	27.8942	27.978					18	5599300000	3.46572	0.0728615	0.667372	0.630346	SYNCRIP	3.46572	0.667372
24.5678	24.7487	25.1238	25.4361	25.4093	25.5831					7	963260000	1.73506	0.113701	0.662725	0.565258	TRIM28	1.73506	0.662725
23.8914	22.406	23.0445	24.3644	23.2828	23.6821					3	469920000	0.549291	0.264976	0.662445	0.43194	RAB13	0.549291	0.662445
22.868	22.9805	23.0458	23.5252	23.7788	23.5738					4	283540000	2.67644	0.0885647	0.661184	0.604673	PIK3C2A	2.67644	0.661184
25.1124	24.9948	25.1151	25.7365	25.7455	25.7186					4	1006200000	4.08242	0.0713201	0.659437	0.633811	COA3	4.08242	0.659437
26.3386	26.2794	26.4302	26.9098	27.1452	26.9509					4	2626400000	2.81372	0.0898521	0.652583	0.601557	SRSF10	2.81372	0.652583
29.0532	29.0127	29.0152	29.7017	29.7077	29.6155					32	17837000000	4.42513	0.0747267	0.64795	0.627525	SF3B3	4.42513	0.64795
26.3197	27.1269	26.9784	27.5416	27.4033	27.4142					4	3245200000	1.20248	0.157586	0.644709	0.51495	NDUFA4	1.20248	0.644709
26.1144	25.7884	25.796	26.5079	26.6572	26.449					8	2123300000	2.17043	0.11223	0.638423	0.567984	RFC3	2.17043	0.638423
23.4767	23.4493	23.3287	23.8789	24.4717	23.8183					4	359470000	1.39475	0.147403	0.638093	0.525901	GTF3C3	1.39475	0.638093
24.7837	23.0184	24.9032	24.8869	25.1027	24.6204					4	727240000	0.435064	0.330859	0.634887	0.390677	UPF3B	0.435064	0.634887
23.0823	23.3031	22.7459	23.539	23.8346	23.6595					2	221280000	1.58714	0.139662	0.633912	0.535699	SLC2A1	1.58714	0.633912
22.5977	22.9679	23.5283	23.5329	23.7642	23.6902					3	246260000	1.06321	0.180347	0.631121	0.493462	MRPL38	1.06321	0.631121
24.3771	24.8209	25.438	25.6049	25.6111	25.3132					6	1066900000	0.912372	0.197382	0.631095	0.477043	CRNKL1	0.912372	0.631095
27.5156	27.4965	27.3057	28.145	28.0048	28.0585					20	4448600000	2.88476	0.101652	0.630173	0.584328	IRS4	2.88476	0.630173
26.8963	26.1234	26.5648	26.7429	27.2791	27.4528					2	2306200000	0.952985	0.193176	0.630068	0.481172	RPL29	0.952985	0.630068
28.1006	28.0459	28.1123	28.8688	28.5256	28.7518					19	8247700000	2.44219	0.111379	0.629131	0.570476	SERBP1	2.44219	0.629131
25.9695	25.7122	26.1017	26.475	26.7172	26.459					9	1804900000	1.93106	0.129951	0.622634	0.5454	RFC5	1.93106	0.622634
23.4509	23.9413	22.5117	23.5973	24.0967	24.0773					3	300780000	0.621893	0.267662	0.6225	0.429283	PELO	0.621893	0.6225
24.1932	24.9248	25.0876	25.25	25.5217	25.2898					5	830290000	1.00853	0.194076	0.618618	0.480361	NOP2	1.00853	0.618618
28.3348	28.2763	28.0838	28.8635	28.8887	28.7984					16	7659200000	2.8128	0.110242	0.618581	0.572522	CPSF3	2.8128	0.618581
24.8396	24.7302	24.9405	25.4028	25.6234	25.3373					4	1039200000	2.36871	0.118366	0.617715	0.558652	ARPC4	2.36871	0.617715
23.7099	23.6855	22.8026	23.8925	24.1208	24.0334					2	358970000	0.942687	0.205765	0.616246	0.471936	DHX37	0.942687	0.616246
27.096	27.2567	27.2404	27.793	27.9162	27.7163					16	4446600000	2.85492	0.11281	0.610815	0.566917	RTCB	2.85492	0.610815
26.4341	26.5035	25.8665	26.8394	26.827	26.9618					11	2618800000	1.37585	0.170685	0.608	0.504022	G3BP1	1.37585	0.608
26.5491	26.5664	26.3237	27.2536	27.0108	26.985					12	2943400000	2.18812	0.134257	0.603444	0.540774	PRPF31	2.18812	0.603444
28.73	28.5408	28.5805	29.2662	29.2316	29.1627					8	10241000000	3.12037	0.113389	0.603076	0.566181	RPL17	3.12037	0.603076
23.196	22.7504	22.4502	23.1842	23.4511	23.5516					6	298080000	1.15575	0.194179	0.596748	0.480162	PSPC1	1.15575	0.596748
25.6745	26.1947	25.7501	26.2615	26.6925	26.4493					10	2802300000	1.35758	0.180525	0.594639	0.493603	PRC1	1.35758	0.594639
29.2468	29.1681	29.2306	29.9279	29.6666	29.8253					20	15514000000	2.75405	0.128439	0.591419	0.547753	RPL3	2.75405	0.591419
26.6155	26.3075	26.7457	27.1184	27.1868	27.1167					13	3349100000	1.94182	0.156818	0.584375	0.516255	UHRF1	1.94182	0.584375
28.1258	28.5256	28.0991	28.8832	28.7882	28.8274					16	9718200000	1.84362	0.162675	0.582774	0.510917	SRSF1	1.84362	0.582774
25.0308	25.0108	24.9143	25.3903	25.6322	25.6734					4	1114800000	2.43296	0.144404	0.579987	0.529507	CDC2	2.43296	0.579987
26.2867	25.7959	21.923	25.4247	25.17	25.1476					7	684700000	0.156783	0.602695	0.57896	0.242962	NOP14	0.156783	0.57896
26.3682	26.4356	26.6067	26.6808	27.2444	27.2018					18	2573900000	1.37301	0.195484	0.572179	0.47898	RRBP1	1.37301	0.572179
24.8821	24.8477	25.1739	25.2834	25.6684	25.6554					8	988340000	1.59568	0.185978	0.567881	0.488197	AIFM1	1.59568	0.567881
28.8428	28.9361	28.7291	29.404	29.4696	29.329					17	14748000000	2.83825	0.146765	0.564884	0.526777	PPP1CA	2.83825	0.564884
30.0611	29.9975	29.916	30.4495	30.7213	30.495					17	26260000000	2.41096	0.157743	0.563712	0.515301	RPS9	2.41096	0.563712
26.4939	26.3218	26.3271	27.0672	26.9699	26.796					9	2914700000	2.35295	0.159364	0.563444	0.513436	MAGOHB	2.35295	0.563444
28.0713	28.1057	28.043	28.7289	28.5333	28.6458					26	7625100000	3.15609	0.143672	0.562707	0.531097	EPB41	3.15609	0.562707
21.8341	21.9382	23.8123	22.8979	22.8369	23.5368					3	150140000	0.341902	0.424548	0.562365	0.334619	AIMP2	0.341902	0.562365
27.1134	27.1729	27.3525	28.0055	27.5062	27.8046					12	4189900000	1.58566	0.193263	0.559165	0.481253	LYAR	1.58566	0.559165
27.204	27.7478	27.2334	27.9665	27.468	28.426					3	4820000000	0.784999	0.28056	0.558409	0.420432	RPS28	0.784999	0.558409
27.9501	27.9663	27.9523	28.5396	28.4293	28.5666					13	6822300000	3.71304	0.142169	0.555606	0.533069	UBTF	3.71304	0.555606
25.7501	26.0099	25.8034	26.6915	26.2865	26.2462					8	1914500000	1.56452	0.198922	0.553616	0.47611	SRSF5	1.56452	0.553616
24.4749	24.7096	24.9973	24.9209	25.5806	25.3343					14	849040000	1.05889	0.246433	0.551365	0.442975	KRT8	1.05889	0.551365
29.9077	29.8562	29.9457	30.5435	30.3966	30.42					34	42163000000	3.33109	0.150592	0.550183	0.522769	XRCC6	3.33109	0.550183
22.6777	23.8036	24.3443	24.132	24.309	24.0258					4	350890000	0.476962	0.373827	0.5471	0.36527	ZC3H14	0.476962	0.5471
26.7576	26.7498	26.8135	27.3349	27.183	27.444					6	3057500000	2.65629	0.16641	0.546987	0.507278	MTX2	2.65629	0.546987
23.2082	25.0991	24.8413	24.9376	24.962	24.8783					8	635780000	0.385864	0.415084	0.543069	0.341001	DSP	0.385864	0.543069
24.6456	25.1149	24.8821	25.3509	25.4505	25.4592					8	1030100000	1.74005	0.204224	0.539322	0.473159	HCFC1	1.74005	0.539322
23.1112	23.1786	23.3952	23.5876	23.9151	23.7889					2	278110000	1.85555	0.201031	0.5355	0.474656	LARS	1.85555	0.5355
26.9663	26.9864	26.9235	27.4761	27.5346	27.4663					11	3559000000	4.33411	0.153845	0.533565	0.518902	CAPZB	4.33411	0.533565
24.307	24.9761	24.6386	25.0985	25.1694	25.251					10	672820000	1.26109	0.244512	0.53236	0.444334	SRSF4	1.26109	0.53236
25.6336	25.4979	25.645	26.2329	25.9818	26.1575					14	1321200000	2.42027	0.184835	0.531888	0.488811	GNAI3	2.42027	0.531888
22.2767	22.7457	23.9282	23.1701	23.6052	23.7645					2	244260000	0.434144	0.402748	0.529708	0.347923	MRPS14	0.434144	0.529708
26.2444	26.5952	26.4831	27.2156	26.6577	27.0336					3	2387800000	1.27604	0.246686	0.528056	0.442219	SNRPC	1.27604	0.528056
27.5165	27.6824	27.6695	28.0401	28.2517	28.1564					28	5898200000	2.53661	0.186905	0.526606	0.487083	LRPPRC	2.53661	0.526606
30.1105	30.0936	30.04	30.7038	30.6049	30.5086					32	30362000000	3.0188	0.180063	0.524423	0.494635	DDX17	3.0188	0.524423
25.2961	25.1234	25.3582	25.4639	26.2728	25.603					8	1358800000	0.938606	0.290966	0.520657	0.413413	CCAR1	0.938606	0.520657
22.2748	22.6981	23.5306	23.4078	23.3673	23.2867					3	235530000	0.631464	0.351075	0.519469	0.379008	YEATS2	0.631464	0.519469
26.8207	26.6991	27.1317	27.3529	27.4915	27.3537					15	3666800000	1.70695	0.231409	0.515539	0.453494	SART1	1.70695	0.515539
28.9294	29.1203	28.8597	29.4908	29.471	29.494					36	15340000000	2.56133	0.196128	0.515494	0.478097	ADAR	2.56133	0.515494
26.0786	25.1654	25.5762	26.1411	26.3117	25.9077					10	1760700000	0.823407	0.31817	0.513371	0.398313	RACGAP1	0.823407	0.513371
23.0722	22.0817	22.0679	22.8285	23.0255	22.9054					3	151720000	0.691783	0.342617	0.512542	0.383244	ZMYND8	0.691783	0.512542
23.9287	23.1396	22.3363	23.6367	23.7775	23.5258					3	228960000	0.477232	0.400639	0.51176	0.349225	POLD1	0.477232	0.51176
24.8146	24.7313	21.8975	24.2814	24.3877	24.3049					3	425770000	0.205498	0.568497	0.510171	0.260383	RCL1	0.205498	0.510171
27.9959	28.3434	28.034	28.5727	28.5782	28.7514					17	8444600000	1.82338	0.231497	0.50967	0.453153	SNRNP70	1.82338	0.50967
27.2153	27.1373	27.1706	27.6122	27.8204	27.6096					16	4324200000	2.63514	0.205917	0.506285	0.471664	HSPA9	2.63514	0.506285
28.27	28.3093	28.2914	28.8617	28.7599	28.7646					20	9206100000	3.87099	0.185988	0.505178	0.488074	SF3B2	3.87099	0.505178
25.863	26.1381	24.2154	25.7587	26.1337	25.8345					6	1409900000	0.340721	0.464585	0.503467	0.312491	MOXD1	0.340721	0.503467
23.2392	23.8063	23.4335	23.9536	24.2186	23.8106					3	359500000	1.15046	0.28838	0.501246	0.416009	UTP14A	1.15046	0.501246
25.4306	25.0662	25.4989	25.8218	26.0157	25.6614					6	1174600000	1.38428	0.268041	0.501117	0.428703	DNAJA3	1.38428	0.501117
24.3627	24.3528	24.1005	24.7918	24.6923	24.8318					6	567000000	2.20005	0.226162	0.499961	0.456468	FXR1	2.20005	0.499961
22.7704	23.7391	22.6133	22.9087	24.1449	23.5676					3	256980000	0.425283	0.428141	0.499468	0.332659	FARSA	0.425283	0.499468
27.3097	27.496	27.5035	27.9071	27.9677	27.9292					21	6611600000	2.78724	0.210423	0.498316	0.467541	DSG2	2.78724	0.498316
26.2329	26.4327	26.3151	26.8326	26.7647	26.8779					13	2532600000	2.76547	0.210654	0.498161	0.467019	PLRG1	2.76547	0.498161
23.0077	23.2628	22.9346	23.5688	23.6067	23.5097					3	242670000	2.05376	0.23989	0.493385	0.447141	CEP170	2.05376	0.493385
25.2028	25.0196	25.5833	25.606	26.0675	25.6099					8	1313100000	1.02368	0.31187	0.492568	0.401802	TCERG1	1.02368	0.492568
26.0064	25.3968	25.272	26.0513	26.3	25.7997					8	1498600000	0.849736	0.335931	0.491941	0.387684	EIF3E	0.849736	0.491941
23.217	21.912	23.7497	23.4505	23.5413	23.3429					2	269270000	0.370021	0.463913	0.485317	0.313328	VWA9	0.370021	0.485317
23.1506	23.6812	22.9469	23.7406	23.7764	23.7049					2	229010000	1.0274	0.325417	0.481035	0.394344	BLM	1.0274	0.481035
26.1731	26.1976	26.1532	26.5415	26.6377	26.7584					8	2181400000	2.7406	0.2462	0.471226	0.442864	RBM17	2.7406	0.471226
23.8837	24.0044	23.7871	24.3465	24.4649	24.2634					6	620500000	2.25451	0.26797	0.46653	0.429643	CHAMP1	2.25451	0.46653
28.4893	28.569	28.7025	29.0311	29.1789	28.9503					5	9438100000	2.15806	0.269487	0.46651	0.427462	RPS25	2.15806	0.46651
31.0909	31.205	31.1293	31.6206	31.4453	31.7501					33	72706000000	2.09739	0.274795	0.463639	0.42363	SFPQ	2.09739	0.463639
25.887	25.9216	25.5232	25.9211	26.2452	26.5549					10	1738900000	0.973025	0.351236	0.463132	0.378684	CSTF2	0.973025	0.463132
27.1463	26.9842	27.1022	27.6202	27.6415	27.3596					14	3960000000	1.96758	0.281556	0.462866	0.419746	CHERP	1.96758	0.462866
28.8568	28.9805	29.0663	29.5103	29.4743	29.2861					14	16753000000	2.10504	0.286673	0.455695	0.417165	HNRNPD	2.10504	0.455695
22.5278	23.3047	23.3326	23.2355	23.7139	23.5814					2	205590000	0.691395	0.399417	0.45524	0.350236	NUP88	0.691395	0.45524
25.2797	25.6111	25.4681	25.8254	26.0234	25.8621					4	1224300000	1.78019	0.306622	0.450652	0.404674	CGGBP1	1.78019	0.450652
27.0222	27.0034	27.3371	27.5017	27.694	27.5184					26	4118400000	1.65026	0.31354	0.450501	0.400632	PDCD11	1.65026	0.450501
23.5278	23.3016	22.5764	23.4391	23.7335	23.5846					3	263870000	0.684598	0.404777	0.450485	0.346717	DNMT1	0.684598	0.450485
28.3592	28.2312	28.0412	28.8452	28.5014	28.6305					13	7468500000	1.51987	0.324692	0.448507	0.394704	RPL8	1.51987	0.448507
28.4596	28.2259	28.1331	28.7244	28.7218	28.7179					8	7024200000	2.00404	0.300052	0.448479	0.408768	RPL19	2.00404	0.448479
25.5831	25.8233	25.7508	26.1251	26.271	26.0961					5	1526800000	2.11912	0.30078	0.445002	0.408494	CSNK2B	2.11912	0.445002
22.3918	22.4336	23.0981	23.1898	23.0688	22.9961					2	190850000	0.87683	0.384173	0.443737	0.359118	CPVL	0.87683	0.443737
28.2611	28.0999	27.9354	28.6941	28.389	28.527					13	7500300000	1.56293	0.335674	0.43788	0.387879	SNRNP40	1.56293	0.43788
27.2541	27.2853	26.9453	27.3227	27.7084	27.7465					6	3251300000	1.16791	0.370148	0.430957	0.367238	RPL35A	1.16791	0.430957
28.9575	29.065	29.0341	29.3985	29.5731	29.3729					15	15347000000	2.43325	0.313235	0.429317	0.401022	PTBP1	2.43325	0.429317
23.0634	21.9013	22.7426	22.9384	23.2425	22.812					2	125070000	0.508014	0.464272	0.428524	0.312949	GTPBP1	0.508014	0.428524
26.1042	26.22	26.1896	26.3606	26.9006	26.5378					3	1928300000	1.23687	0.369467	0.428395	0.368462	GAR1	1.23687	0.428395
23.4121	23.3434	22.3677	23.6311	23.4462	23.3254					10	197020000	0.53984	0.459979	0.4265	0.316212	DDX39A	0.53984	0.4265
23.7169	24.2673	24.2218	24.7883	24.3483	24.3414					4	492140000	0.856333	0.408093	0.423978	0.344664	NUP107	0.856333	0.423978
28.9032	28.7322	28.6856	29.2403	29.1283	29.222					10	11891000000	2.32014	0.325526	0.423238	0.39382	RPS7	2.32014	0.423238
27.2974	27.0559	27.4918	27.6653	27.7188	27.7044					21	3992200000	1.50802	0.369888	0.41448	0.367743	LMNA	1.50802	0.41448
25.3913	25.2382	25.7411	25.9388	25.9361	25.7277					8	1356400000	1.17427	0.395553	0.41069	0.352693	SRPK1	1.17427	0.41069
22.3766	22.9475	22.9383	23.2073	23.2376	23.0421					2	179500000	0.963803	0.41489	0.40817	0.340616	ARPC5L	0.963803	0.40817
27.9964	28.382	28.2283	28.5617	28.6087	28.6534					32	9489900000	1.61295	0.37509	0.405694	0.363802	GTF2I	1.61295	0.405694
25.495	25.5249	25.4755	25.7691	25.9147	26.025					7	1275300000	2.23227	0.356541	0.404476	0.376081	PRMT1	2.23227	0.404476
27.3493	27.3297	27.3633	27.7813	27.7775	27.673					22	4703300000	3.3761	0.344164	0.396493	0.382421	MSH6	3.3761	0.396493
25.7057	25.1674	25.5983	25.9214	25.9159	25.8076					11	1400700000	1.09086	0.424764	0.391206	0.334761	SYMPK	1.09086	0.391206
28.5948	28.6106	28.5544	28.8978	28.9428	29.0759					6	9096500000	2.63145	0.373595	0.385588	0.365129	RPL31	2.63145	0.385588
22.824	22.7314	23.604	23.248	23.6688	23.3877					2	203090000	0.558464	0.500861	0.381706	0.292919	ABT1	0.558464	0.381706
28.3281	28.3731	28.2262	28.6211	28.7552	28.6815					29	8908100000	2.53207	0.389977	0.376835	0.3561	SMARCA5	2.53207	0.376835
28.3503	28.5897	28.6365	28.9893	28.8402	28.8722					18	8972500000	1.70674	0.415215	0.375081	0.341121	PGAM5	1.70674	0.375081
25.855	25.4741	25.3954	25.8144	25.8895	26.1431					3	1447700000	1.01326	0.457342	0.37416	0.318896	EBP	1.01326	0.37416
28.8193	28.7641	28.9835	29.3318	29.214	29.136					24	12726000000	1.88714	0.414372	0.371585	0.341826	MATR3	1.88714	0.371585
25.5111	26.3099	25.8509	26.2752	26.2774	26.2248					15	1528300000	0.726969	0.489688	0.368497	0.299087	SRRT	0.726969	0.368497
27.2371	27.3761	27.4269	27.778	27.5407	27.8154					17	5145000000	1.61937	0.432335	0.364668	0.330607	TPM3	1.61937	0.364668
24.0147	23.9777	22.6954	23.9058	23.9935	23.8819					3	397530000	0.347442	0.58131	0.364447	0.253962	NOSIP	0.347442	0.364447
28.5379	28.3054	28.4682	29.0409	28.5766	28.7766					8	11219000000	1.12319	0.464318	0.360879	0.313508	FUS	1.12319	0.360879
24.2218	22.3335	23.9246	23.8497	23.835	23.8729					3	405840000	0.241684	0.637162	0.359218	0.226448	RBM12B	0.241684	0.359218
26.4336	26.3872	26.4986	26.6948	26.9328	26.7603					14	2662700000	1.98821	0.432531	0.356202	0.330437	MDC1	1.98821	0.356202
24.7123	25.0501	24.977	25.3581	25.1867	25.2531					8	746200000	1.43792	0.45987	0.352897	0.316752	RFC2	1.43792	0.352897
27.8958	28.0226	27.9188	28.3847	28.2619	28.2472					10	5962500000	2.41678	0.428427	0.35219	0.332731	VDAC1	2.41678	0.35219
23.1648	22.4531	22.4488	22.8893	23.2221	23.0065					2	175390000	0.611474	0.52904	0.350413	0.278739	TAF5	0.611474	0.350413
26.9363	27.0456	27.2901	27.363	27.5407	27.4118					14	3800700000	1.38417	0.465889	0.347839	0.311333	KHSRP	1.38417	0.347839
31.1285	31.0838	30.8868	31.5264	31.2464	31.3628					22	61570000000	1.45764	0.465692	0.345477	0.311229	ACTA1	1.45764	0.345477
23.7979	26.1038	25.3314	24.9519	25.6244	25.6922					5	867200000	0.183305	0.688446	0.34515	0.200942	CD2BP2	0.183305	0.34515
24.1258	24.3251	21.2116	23.6851	23.3721	23.6389					2	264890000	0.124702	0.745187	0.344523	0.171323	PNISR	0.124702	0.344523
25.2849	25.1967	25.1419	25.406	25.5326	25.7044					7	1071500000	1.61992	0.466099	0.339845	0.310085	TMOD3	1.61992	0.339845
29.2472	29.1858	29.3675	29.6765	29.5274	29.614					38	17237000000	2.1061	0.459375	0.339136	0.317338	SF3B1	2.1061	0.339136
28.586	28.5663	28.3876	28.9596	28.809	28.7806					8	8279700000	1.79327	0.466226	0.336432	0.310346	RPS17	1.79327	0.336432
26.286	26.3612	26.4409	26.699	26.6216	26.7576					11	2092700000	2.28423	0.466218	0.329999	0.311441	ZFR	2.28423	0.329999
22.2534	25.1873	24.7044	23.8545	24.7252	24.5521					5	450880000	0.127432	0.750138	0.328915	0.168984	CTCF	0.127432	0.328915
22.5366	22.7621	23.271	23.0166	23.3149	23.2192					1	206150000	0.628312	0.5575	0.327029	0.264943	NR2F2	0.628312	0.327029
28.1874	28.3975	28.3161	28.6036	28.7271	28.5281					20	8624600000	1.71389	0.499548	0.319252	0.294429	RUVBL1	1.71389	0.319252
24.176	24.0477	23.8751	24.2058	24.4481	24.3888					3	452480000	1.29755	0.521945	0.314651	0.28254	MRPS34	1.29755	0.314651
27.2065	27.2159	27.3856	27.5369	27.6395	27.573					18	3593800000	2.06048	0.499979	0.313825	0.294535	NCL	2.06048	0.313825
26.0476	25.6986	25.7213	26.0522	26.5063	25.838					9	1625800000	0.612202	0.584956	0.309653	0.252368	WDR36	0.612202	0.309653
25.5274	25.2514	25.5446	25.5585	25.9079	25.7841					7	1287300000	1.03989	0.545522	0.309039	0.271185	THOC5	1.03989	0.309039
27.344	27.2208	27.1826	27.5592	27.5758	27.5122					6	4037200000	2.33973	0.517039	0.29996	0.285055	SNRPD2	2.33973	0.29996
28.468	28.1464	28.3616	28.7762	28.5071	28.5876					21	7918600000	1.13378	0.557495	0.298295	0.265451	RBM25	1.13378	0.298295
23.3321	22.4203	22.8868	23.1125	23.2148	23.205					4	254470000	0.488829	0.620194	0.29773	0.235316	INTS10	0.488829	0.29773
23.1042	24.5388	24.7181	24.2916	24.4616	24.5001					5	527390000	0.225946	0.695964	0.297398	0.19634	RALY	0.225946	0.297398
25.7059	25.1146	25.8667	26.2312	25.7611	25.5817					12	1303000000	0.420549	0.635422	0.295626	0.227465	YES1	0.420549	0.295626
25.4152	25.0114	25.1519	25.7651	25.4468	25.2518					5	912530000	0.705946	0.593198	0.295061	0.247794	LIN7C	0.705946	0.295061
27.9151	27.8348	27.5835	28.2863	27.9153	28.016					18	5914000000	0.923167	0.577673	0.294708	0.256458	SF3A1	0.923167	0.294708
22.6288	23.2676	23.1785	23.5262	23.186	23.2454					3	165840000	0.581486	0.609032	0.294276	0.240103	CLINT1	0.581486	0.294276
29.3233	29.391	29.103	29.5404	29.4854	29.6726					15	17279000000	1.33203	0.555966	0.293709	0.266239	GNB2	1.33203	0.293709
28.109	28.3768	28.1028	28.615	28.4331	28.4134					16	7572400000	1.23325	0.564399	0.29093	0.261911	EIF4A3	1.23325	0.29093
28.6453	28.9401	28.8539	29.2988	28.908	29.0853					17	12124000000	0.929884	0.591818	0.284283	0.248739	PRPF19	0.929884	0.284283
23.9318	23.9109	24.0716	24.1695	24.2394	24.3515					2	407390000	1.73899	0.562618	0.282024	0.262794	VRK2	1.73899	0.282024
23.7505	23.9809	23.9384	24.2975	24.0399	24.1728					11	330120000	1.27974	0.582297	0.280124	0.254044	GNAI1	1.27974	0.280124
28.7609	28.5105	28.6401	28.8545	28.9953	28.8967					6	9822000000	1.53815	0.576885	0.278345	0.256905	RPL38	1.53815	0.278345
22.779	23.0102	23.7066	23.3922	23.6469	23.2908					2	313450000	0.393693	0.660375	0.278039	0.214171	ARPC3	0.393693	0.278039
26.2451	26.3372	26.1786	26.4923	26.6505	26.4338					10	2051000000	1.57427	0.585406	0.271914	0.251916	NOC2L	1.57427	0.271914
23.1671	25.468	23.3327	24.3469	24.4178	24.0139					4	404770000	0.132376	0.772291	0.270239	0.154307	SEH1L	0.132376	0.270239
28.0049	28.4321	28.1292	28.5673	28.4558	28.3534					3	6340500000	0.892607	0.617985	0.270141	0.23674	FAU	0.892607	0.270141
23.9108	23.7142	23.8334	24.4881	23.5095	24.2646					4	417110000	0.372235	0.678428	0.267963	0.205883	LSM6	0.372235	0.267963
28.7478	28.6912	28.8251	29.1168	29.0048	28.9417					23	10621000000	1.84453	0.588527	0.266432	0.250345	NOP56	1.84453	0.266432
31.1701	31.2257	31.2008	31.5357	31.4832	31.3712					21	60351000000	2.17838	0.585651	0.264481	0.25162	TUBA1B	2.17838	0.264481
22.3297	23.6951	22.9438	23.1215	23.493	23.1381					2	161160000	0.250839	0.721146	0.261335	0.18495	OMA1	0.250839	0.261335
25.4325	25.0911	25.0485	25.496	25.4523	25.4076					5	857670000	0.9864	0.625231	0.261258	0.232401	MFAP1	0.9864	0.261258
27.2503	27.2511	27.2145	27.5108	27.5217	27.462					10	3916800000	3.53269	0.581803	0.259583	0.254005	HNRNPDL	3.53269	0.259583
25.8054	25.8671	25.9052	26.2696	26.1484	25.9376					4	1242000000	1.20372	0.620154	0.259317	0.235475	RBM8A	1.20372	0.259317
28.1823	28.0611	28.0788	28.3525	28.322	28.4193					20	7477500000	2.24937	0.59701	0.257245	0.245581	ACIN1	2.24937	0.257245
32.643	32.6339	32.6244	32.88	32.8418	32.9444					46	135090000000	2.95514	0.593251	0.254974	0.247446	VIM	2.95514	0.254974
25.4184	25.2238	25.2619	25.5561	25.6034	25.4908					10	1007900000	1.66748	0.624315	0.248787	0.232968	COPB2	1.66748	0.248787
24.1321	24.3311	22.903	24.1283	23.9944	23.9897					5	336050000	0.215388	0.744964	0.248747	0.171683	PHF8	0.215388	0.248747
27.7779	27.7607	27.9218	28.0047	28.2127	27.9709					13	6478500000	1.24823	0.64416	0.242634	0.222343	BRIX1	1.24823	0.242634
29.2508	29.0506	29.0003	29.2559	29.4162	29.3469					11	13960000000	1.2541	0.651287	0.239128	0.219484	SRSF6	1.2541	0.239128
28.3314	28.3219	28.2376	28.6264	28.4056	28.5632					12	8006300000	1.50588	0.651438	0.23475	0.218964	STOML2	1.50588	0.23475
26.3092	26.193	26.3595	26.5973	26.4164	26.5315					16	1994100000	1.46279	0.66459	0.227842	0.212482	PPP1CB	1.46279	0.227842
30.2695	30.2155	30.3078	30.495	30.5218	30.4549					55	28675000000	2.6215	0.651594	0.226292	0.219045	TOP2B	2.6215	0.226292
26.9737	27.2402	27.2917	27.5552	27.2559	27.3614					4	3351200000	0.776983	0.696451	0.222307	0.196407	SF3B5	0.776983	0.222307
24.3556	24.3404	24.4619	24.5929	24.4127	24.8176					7	665260000	0.834961	0.695057	0.221789	0.197459	PDS5A	0.834961	0.221789
29.1948	28.792	29.0326	29.474	28.9863	29.1991					14	13015000000	0.509676	0.728962	0.213348	0.180292	RPS5	0.509676	0.213348
30.2736	30.205	30.2174	30.5331	30.3938	30.4058					72	29427000000	1.89894	0.68598	0.212171	0.2022	MYH10	1.89894	0.212171
28.1448	28.2236	28.029	28.2703	28.3131	28.4493					8	6349000000	1.27141	0.697024	0.21176	0.196413	SRSF7	1.27141	0.21176
26.8225	27.1668	26.6491	27.0354	27.1829	27.0548					23	3586600000	0.594795	0.724509	0.211541	0.182516	SUPT6H	0.594795	0.211541
24.6949	24.987	24.8142	25.2042	25.0887	24.834					6	1006900000	0.691929	0.720837	0.210263	0.184704	SCML2	0.691929	0.210263
25.2974	25.6906	25.6021	25.8338	25.7151	25.6644					10	1148700000	0.737051	0.721549	0.207726	0.183955	RBM28	0.737051	0.207726
26.6592	26.5259	25.6713	26.6127	26.4448	26.4192					7	2239800000	0.261379	0.768705	0.206813	0.157225	NDUFS8	0.261379	0.206813
25.5696	25.5074	25.8148	26.0896	25.8382	25.5825					7	1359300000	0.520873	0.735695	0.206163	0.175624	EIF4G1	0.520873	0.206163
27.7995	27.4202	27.301	27.6572	27.6516	27.8234					27	3981800000	0.564	0.736293	0.203868	0.175671	LMNB2	0.564	0.203868
26.0155	26.3772	26.5378	26.4248	26.6984	26.411					10	2209100000	0.48474	0.74637	0.20126	0.170474	THOC1	0.48474	0.20126
22.2574	22.2203	21.9689	22.1796	22.7055	22.1432					2	115570000	0.404847	0.762535	0.193886	0.161164	CUL4B	0.404847	0.193886
24.89	25.5212	23.9255	25.4038	24.5163	24.9851					6	1002100000	0.131483	0.822318	0.189494	0.123848	CBX5	0.131483	0.189494
26.6837	26.4268	26.6645	26.8937	26.5319	26.9155					4	2336800000	0.560662	0.758649	0.188677	0.164164	GNG12	0.560662	0.188677
22.4382	23.2033	24.0393	23.4086	23.5806	23.2389					3	215750000	0.143126	0.822966	0.182428	0.123867	LAS1L	0.143126	0.182428
28.5917	28.4267	28.5474	28.6526	28.7441	28.7023					9	9195000000	1.47317	0.750392	0.177723	0.168307	DEK	1.47317	0.177723
30.4507	30.6635	30.6524	30.683	30.8232	30.7913					11	48911000000	1.02423	0.75885	0.176987	0.163706	HIST1H4A	1.02423	0.176987
29.2855	29.2689	29.3131	29.5515	29.4785	29.3627					32	16231000000	1.44218	0.754777	0.175093	0.16574	CPSF1	1.44218	0.175093
25.8017	26.1251	25.9292	26.4824	26.0007	25.892					3	1264000000	0.351742	0.791587	0.17299	0.143639	NAP1L1	0.351742	0.17299
25.5842	25.0737	25.1749	25.5548	25.4779	25.3142					8	847510000	0.426945	0.787949	0.171329	0.146256	SLTM	0.426945	0.171329
29.2573	29.0222	29.0658	29.2454	29.357	29.2503					32	14387000000	0.980041	0.769662	0.169107	0.156455	MYBBP1A	0.980041	0.169107
24.2422	24.0494	24.2046	24.3894	24.3762	24.2349					5	487730000	1.0253	0.769437	0.168154	0.156132	ARPC2	1.0253	0.168154
23.52	23.2041	23.1018	23.4033	23.4706	23.4536					3	215750000	0.585219	0.784357	0.167208	0.148302	UPF1	0.585219	0.167208
26.3547	26.2796	25.7125	26.1194	26.4501	26.2582					10	1935500000	0.288878	0.812545	0.160309	0.130945	RARS	0.288878	0.160309
24.999	24.4053	25.0689	24.8282	25.0436	25.0773					5	671430000	0.285027	0.814057	0.158656	0.129566	MPRIP	0.285027	0.158656
23.4176	22.9143	23.5358	23.3985	23.5217	23.4209					3	243850000	0.33506	0.810563	0.157775	0.132108	IPO4	0.33506	0.157775
23.3849	22.4367	23.7743	23.0791	23.619	23.3695					2	190570000	0.135899	0.839474	0.157174	0.110163	MYO5A	0.135899	0.157174
29.2447	29.2361	29.3043	29.3996	29.4038	29.4455					31	15719000000	2.39762	0.779464	0.154622	0.150706	DHX15	2.39762	0.154622
29.6317	29.5894	29.5138	29.6764	29.7522	29.7628					14	17100000000	1.58974	0.788108	0.152145	0.145744	HNRNPC	1.58974	0.152145
25.583	25.8942	25.7009	25.7167	25.9961	25.9014					9	1417300000	0.522234	0.813511	0.145357	0.129514	RRP12	0.522234	0.145357
31.1635	31.2324	31.1307	31.3961	31.3155	31.2493					22	48644000000	1.30513	0.801108	0.144765	0.137613	HNRNPK	1.30513	0.144765
22.5904	25.1689	24.6803	23.7092	24.4099	24.7542					6	434250000	0.0589891	0.895759	0.144541	0.0781969	ZC3HAV1	0.0589891	0.144541
24.7719	24.6951	23.301	24.5404	24.3514	24.292					2	377430000	0.10306	0.870504	0.138603	0.0934076	RPS19BP1	0.10306	0.138603
26.4836	26.4427	26.3201	26.6926	26.4647	26.4964					16	2278100000	0.717028	0.821587	0.135764	0.124948	BAZ1A	0.717028	0.135764
25.7829	25.6777	25.8038	25.8784	25.841	25.9521					8	1425400000	1.25279	0.81346	0.135706	0.129139	SNAP23	1.25279	0.135706
29.4235	29.3728	29.4718	29.5684	29.5339	29.5687					25	14753000000	1.91758	0.813549	0.134305	0.130289	ILF3	1.91758	0.134305
26.9042	26.9808	27.1473	27.2234	26.9569	27.252					9	3514800000	0.491537	0.827987	0.133356	0.119256	HNRNPA0	0.491537	0.133356
27.9024	28.1395	28.2172	28.3946	28.186	28.0718					14	6799000000	0.41734	0.833798	0.131097	0.115631	PRPF40A	0.41734	0.131097
26.3361	26.717	26.8495	26.7948	26.6451	26.8552					11	2321500000	0.323481	0.837908	0.130846	0.112212	RBM15	0.323481	0.130846
30.1452	30.3758	30.3069	30.3195	30.3705	30.5008					37	27438000000	0.624891	0.838321	0.120983	0.111289	LMNB1	0.624891	0.120983
29.6846	29.5763	29.7602	29.6742	29.7993	29.8989					42	18965000000	0.626679	0.842699	0.11711	0.108024	HNRNPM	0.626679	0.11711
26.9546	27.1146	26.5038	26.9284	27.0585	26.8931					13	2643800000	0.208935	0.882444	0.102327	0.0860157	EIF4A1	0.208935	0.102327
27.3569	27.3988	27.4233	27.5252	27.4653	27.4752					12	4029200000	1.62799	0.870508	0.0955181	0.0930234	POLDIP3	1.62799	0.0955181
25.1868	25.3658	25.5258	25.3645	25.3466	25.6431					10	947020000	0.26837	0.891882	0.0919895	0.0808969	NEFM	0.26837	0.0919895
23.3224	22.9518	23.0392	22.9819	23.4136	23.1598					3	231590000	0.183126	0.908336	0.0806955	0.0690926	MAP4K4	0.183126	0.0806955
22.3613	22.4636	22.5556	22.5932	22.6557	22.3706					2	92446000	0.316073	0.903994	0.079656	0.0722092	DCTN1	0.316073	0.079656
29.1024	29.3103	29.2146	29.4076	29.1483	29.3031					16	12262000000	0.329991	0.906359	0.0772177	0.0704323	HNRNPL	0.329991	0.0772177
31.4866	31.3106	31.3167	31.5714	31.3521	31.415					40	57592000000	0.358516	0.907963	0.0749194	0.0689193	DDX21	0.358516	0.0749194
26.6709	27.0994	26.8866	27.2418	26.6638	26.962					7	2676100000	0.123699	0.92353	0.070275	0.0581879	HNRNPF	0.123699	0.070275
30.188	30.1028	30.1038	30.2574	30.1823	30.1402					19	25054000000	0.626017	0.922814	0.061814	0.0591841	HNRNPU	0.626017	0.061814
28.0734	28.1141	28.439	28.5133	28.0763	28.2155					6	6229800000	0.125853	0.935362	0.0595093	0.050725	MYL6	0.125853	0.0595093
27.359	27.3466	27.6043	27.4849	27.5723	27.416					25	5306200000	0.223149	0.936797	0.0544809	0.0497397	JUP	0.223149	0.0544809
21.9448	23.0308	23.5102	22.9449	22.8188	22.8843					3	134720000	0.0395343	0.956397	0.0540403	0.0369002	DHX16	0.0395343	0.0540403
22.3228	23.041	23.1738	22.911	23.0223	22.7307					2	109260000	0.0521891	0.962078	0.0421168	0.0329646	MTHFD1L	0.0521891	0.0421168
28.9663	28.9142	28.9816	29.03	28.9968	28.9606					22	9522500000	0.661518	0.951007	0.0417353	0.0405756	HSPA1B	0.661518	0.0417353
23.7091	23.4056	22.6833	23.0526	23.6552	23.2099					2	180740000	0.0382949	0.967754	0.0399138	0.0294841	CKB	0.0382949	0.0399138
26.2929	26.1731	26.2744	26.4385	26.1278	26.2884					4	1658400000	0.14572	0.959979	0.0380878	0.0347159	PHF5A	0.14572	0.0380878
25.6219	25.0886	25.1216	25.3987	25.2205	25.3103					11	990820000	0.0626253	0.96986	0.0324523	0.0275011	HNRNPH2	0.0626253	0.0324523
22.9803	22.5417	23.6459	23.5793	23.1539	22.52					2	145120000	0.0213574	0.97839	0.0284774	0.0197117	NDUFC1	0.0213574	0.0284774
27.3029	27.2516	27.2918	27.3957	27.235	27.2979					11	3685500000	0.216593	0.971169	0.0274378	0.0261494	SNRPA1	0.216593	0.0274378
22.9961	23.9794	22.1884	23.1385	23.171	22.9359					2	179170000	0.0172463	0.978628	0.027167	0.0178372	ATRX	0.0172463	0.027167
31.6407	31.6486	31.7052	31.7633	31.6528	31.6598					35	72887000000	0.263324	0.970527	0.0271295	0.0260583	DDX5	0.263324	0.0271295
27.4734	27.6457	27.7208	27.7335	27.5497	27.6272					8	4352200000	0.092546	0.975985	0.0235011	0.0215493	CPSF4	0.092546	0.0235011
28.123	28.2422	28.365	28.3992	28.1342	28.2542					10	6657300000	0.0641268	0.978473	0.0191129	0.0173172	FIP1L1	0.0641268	0.0191129
31.0355	31.0369	31.1051	31.1312	31.0383	31.061					21	48273000000	0.18666	0.9782	0.017697	0.0170786	TUBB4B	0.18666	0.017697
25.5834	25.316	25.6205	25.4767	25.5065	25.5839					8	1211800000	0.0537679	0.982232	0.0157757	0.0143273	RAD50	0.0537679	0.0157757
27.7662	28.1023	27.951	28.2137	27.6958	27.9544					5	4500300000	0.0277887	0.98361	0.0147578	0.0125244	RPS27A	0.0277887	0.0147578
27.2634	27.2817	27.2796	27.355	27.2275	27.269					4	2735600000	0.0831635	0.989296	0.0089283	0.00860154	RPS27	0.0831635	0.0089283
24.184	24.1838	24.314	24.2283	24.399	24.07					3	425110000	0.016287	0.99507	0.00512759	0.00464275	C12orf43	0.016287	0.00512759
30.295	30.236	30.0837	30.2412	30.1806	30.2005					15	23481000000	0.0124112	0.996985	0.00245857	0.00230759	HNRNPH1	0.0124112	0.00245857
24.8788	25.0729	22.5252	24.1785	24.2567	24.0459					6	575330000	0.000555715	0.998544	0.00139999	0.000768762	DLGAP5	0.000555715	0.00139999
23.5065	22.4736	21.9124	22.5027	22.7484	22.6315					2	115280000	0.00231875	0.996383	-0.00335248	-0.00227722	ABCC4	0.00231875	-0.00335248
23.7844	23.1096	22.9554	23.1283	23.543	23.1661					1	158880000	0.00459796	0.996566	-0.00402896	-0.00313071	RAI14	0.00459796	-0.00402896
27.8696	27.392	27.7381	27.887	27.5137	27.5489					16	4184800000	0.0302567	0.981854	-0.0166817	-0.0140703	LIMA1	0.0302567	-0.0166817
22.8327	22.1967	22.3638	22.4967	22.5201	22.3095					2	124890000	0.0374816	0.977729	-0.0222925	-0.0185509	PPFIA1	0.0374816	-0.0222925
26.6753	25.9554	27.0204	26.7671	26.2767	26.5292					8	2610600000	0.0253493	0.977911	-0.0260518	-0.0193809	CBX3	0.0253493	-0.0260518
28.8353	28.8211	28.9149	28.9811	28.7937	28.717					18	13286000000	0.114909	0.971773	-0.0264746	-0.0244304	SLC25A6	0.114909	-0.0264746
23.8584	24.5984	24.3533	24.2582	24.4125	24.048					4	565200000	0.042937	0.972345	-0.0304648	-0.0245304	KIF22	0.042937	-0.0304648
26.3975	26.1675	25.8209	26.1673	26.1166	26.0041					9	1586600000	0.0651422	0.970099	-0.0326233	-0.0277789	RFC4	0.0651422	-0.0326233
24.9222	24.9821	24.8553	24.9068	24.8678	24.8856					6	611810000	0.360813	0.96424	-0.0331402	-0.0319177	SEC13	0.360813	-0.0331402
29.0458	29.1998	28.7628	29.0481	28.8724	28.9864					12	11475000000	0.0871554	0.968	-0.0338612	-0.0297564	HNRNPA3	0.0871554	-0.0338612
26.0834	25.6483	25.661	25.4961	25.6142	26.1362					4	843810000	0.0700941	0.953267	-0.0487239	-0.0391939	GNA11	0.0700941	-0.0487239
26.7715	26.6218	26.7572	26.7873	26.6118	26.5989					16	2224700000	0.262722	0.940089	-0.0508823	-0.0472334	NUP93	0.262722	-0.0508823
27.7314	27.9634	27.8676	28.0222	27.6476	27.7255					23	4732900000	0.157451	0.936998	-0.0556806	-0.0491662	WDR33	0.157451	-0.0556806
23.4079	24.5849	22.7163	23.5525	23.3342	23.6262					2	233920000	0.0402652	0.949208	-0.0654151	-0.0421363	ACTR3	0.0402652	-0.0654151
31.0093	31.1845	31.0452	30.8599	31.1349	31.0381					6	62333000000	0.286835	0.916968	-0.0686595	-0.0626094	HIST1H2AJ	0.286835	-0.0686595
26.0611	26.0734	25.9706	25.8031	26.0628	26.004					6	1272200000	0.388642	0.904612	-0.0784028	-0.072259	KRR1	0.388642	-0.0784028
26.082	26.2836	25.9527	26.0214	26.0972	25.9503					15	1579900000	0.324675	0.898943	-0.0831687	-0.0752507	SLC25A4	0.324675	-0.0831687
26.7253	26.7567	26.6503	26.7626	26.1864	26.9047					11	2231000000	0.156829	0.898187	-0.0929139	-0.0760418	CHCHD3	0.156829	-0.0929139
28.8467	28.6666	28.6069	28.9291	28.4971	28.4087					7	7706200000	0.20894	0.891191	-0.0950877	-0.0808421	RPL30	0.20894	-0.0950877
29.4077	29.5793	29.3929	29.5612	29.1689	29.3625					8	13690000000	0.304507	0.88404	-0.0958029	-0.0849264	KHDRBS1	0.304507	-0.0958029
25.4714	25.4636	25.5093	25.3482	25.4668	25.2686					5	981650000	0.948973	0.836835	-0.120254	-0.113522	CCT4	0.948973	-0.120254
28.0635	28.0183	27.8366	27.9938	27.7844	27.7529					20	5015500000	0.557943	0.831091	-0.129086	-0.117075	RRP1B	0.557943	-0.129086
22.206	25.1268	21.7103	22.76	22.9417	22.9456					3	148400000	0.0420957	0.915502	-0.13192	-0.0638026	NCAPG2	0.0420957	-0.13192
28.3512	28.357	28.5675	28.2892	28.3182	28.2719					14	8090400000	0.847269	0.822782	-0.132138	-0.123214	KPNA2	0.847269	-0.132138
24.4257	24.3019	24.4897	24.6312	23.7859	24.3819					4	457470000	0.210455	0.838257	-0.139434	-0.110946	YTHDC1	0.210455	-0.139434
25.509	25.0912	25.007	25.1377	25.1195	24.9242					4	781650000	0.347074	0.824858	-0.141941	-0.12136	TRA2B	0.347074	-0.141941
28.6065	28.8453	28.8808	28.7518	28.4417	28.7099					16	9361100000	0.478371	0.819078	-0.143056	-0.126617	HNRNPA2B1	0.478371	-0.143056
23.9866	23.6726	23.4354	23.1018	23.6684	23.8908					4	353600000	0.1955	0.837912	-0.144554	-0.112583	ZNF24	0.1955	-0.144554
26.4915	26.7506	26.5002	26.8283	26.1803	26.2952					13	1803100000	0.269669	0.826922	-0.146152	-0.120098	RBM14	0.269669	-0.146152
23.2393	23.1242	22.5236	22.8835	22.9634	22.596					2	359120000	0.23417	0.828584	-0.148033	-0.118583	TRIM33	0.23417	-0.148033
27.4391	27.6264	27.5533	27.4586	27.3895	27.3116					9	4083200000	1.04014	0.792423	-0.153009	-0.14312	EEF1G	1.04014	-0.153009
30.2246	30.2955	30.3871	30.2319	30.0614	30.125					27	22132000000	1.11919	0.775812	-0.16297	-0.152525	HSPA8	1.11919	-0.16297
23.9271	24.2466	24.1557	23.9062	24.1033	23.8198					4	404200000	0.587	0.78472	-0.166718	-0.14796	MBNL1	0.587	-0.166718
22.6178	24.312	22.9177	23.2581	23.1167	22.9435					2	181250000	0.121528	0.833709	-0.1764	-0.115305	MAU2	0.121528	-0.1764
27.1096	27.0389	26.816	27.0512	26.5487	26.8113					14	2853800000	0.47005	0.769063	-0.184467	-0.157669	GNB1	0.47005	-0.184467
25.8796	25.8304	25.4416	25.3379	25.6936	25.5656					7	1001600000	0.46094	0.768805	-0.184868	-0.157574	CPSF7	0.46094	-0.184868
28.6182	28.5395	28.4256	28.3483	28.3539	28.3243					12	7718400000	1.51492	0.736892	-0.185629	-0.175681	VDAC2	1.51492	-0.185629
26.2147	26.2553	26.357	25.9551	26.3696	25.9446					8	1736600000	0.56455	0.761474	-0.185871	-0.16216	ANXA6	0.56455	-0.185871
25.7704	25.5434	25.3752	25.2719	25.6085	25.2435					5	831840000	0.502608	0.76164	-0.188377	-0.161857	MRPS7	0.502608	-0.188377
26.4394	26.2833	26.6259	26.3051	26.3704	26.1039					8	1414200000	0.676004	0.750163	-0.189683	-0.168243	FUBP3	0.676004	-0.189683
27.7069	27.3519	27.3869	27.1895	27.4731	27.2097					15	3772600000	0.587325	0.753273	-0.191113	-0.166873	DDX1	0.587325	-0.191113
24.814	24.6752	24.916	24.5445	24.5562	24.7194					4	645680000	1.02014	0.730645	-0.195072	-0.179004	TRA2A	1.02014	-0.195072
29.211	29.2836	29.269	28.8917	29.0546	29.2009					9	9240800000	1.04901	0.71298	-0.205452	-0.18814	RPL26	1.04901	-0.205452
26.7812	26.6951	26.7441	26.6053	26.5738	26.4222					7	2044100000	1.54049	0.700148	-0.206375	-0.194369	ZNF512	1.54049	-0.206375
25.4014	25.1366	25.5059	25.1874	25.3129	24.9153					7	659910000	0.580737	0.729093	-0.20945	-0.180441	RPP30	0.580737	-0.20945
26.6674	26.6506	27.4522	26.689	26.5999	26.7149					6	2476800000	0.406256	0.686804	-0.255478	-0.201681	SF3B6	0.406256	-0.255478
26.0088	26.0322	25.9602	25.6376	25.8164	25.7628					10	1392700000	1.99278	0.592751	-0.261524	-0.247403	CHD7	1.99278	-0.261524
22.7808	23.0723	24.084	22.8716	23.1979	23.0582					2	200990000	0.265362	0.705742	-0.26976	-0.191858	INTS5	0.265362	-0.26976
27.3474	27.4842	28.2478	27.5827	27.2924	27.3875					8	3578000000	0.392408	0.667834	-0.272286	-0.210608	ANXA2	0.392408	-0.272286
25.548	25.686	25.1418	24.809	25.3909	25.3536					7	1011700000	0.477691	0.650744	-0.274125	-0.219459	THOC7	0.477691	-0.274125
23.3592	23.418	23.3522	22.4152	23.1163	23.7404					2	192690000	0.303369	0.677046	-0.285826	-0.206622	SEC61B	0.303369	-0.285826
26.1065	26.4308	26.6154	25.7423	26.5375	25.9716					13	1799600000	0.465302	0.62006	-0.300432	-0.234854	RBM27	0.465302	-0.300432
29.6725	29.7094	29.7757	29.4281	29.5123	29.2756					7	14524000000	1.84705	0.502978	-0.313863	-0.291811	RPS10	1.84705	-0.313863
26.77	26.7125	26.5901	26.3249	26.4112	26.3949					6	1578500000	2.21373	0.496149	-0.313893	-0.296322	RCC1	2.21373	-0.313893
26.0454	24.5503	24.6897	24.7934	24.7849	24.7447					3	575580000	0.269064	0.654791	-0.320763	-0.217163	HRAS	0.269064	-0.320763
26.4995	26.6414	26.6533	26.1529	26.4724	26.1697					10	1819800000	1.35419	0.48987	-0.333087	-0.298741	MCM3	1.35419	-0.333087
22.6177	23.4061	25.2172	23.4357	23.627	23.169					3	232080000	0.161911	0.711266	-0.336432	-0.188912	AATF	0.161911	-0.336432
27.5931	27.5994	27.8092	27.7149	26.9263	27.3289					6	3376800000	0.652062	0.530377	-0.343868	-0.277649	SLC16A1	0.652062	-0.343868
25.4655	21.8603	23.835	23.5346	23.8092	22.7774					3	323130000	0.115871	0.754534	-0.346557	-0.166052	RDX	0.115871	-0.346557
25.3634	25.2804	25.3072	24.8493	25.208	24.823					5	648600000	1.32053	0.460165	-0.356929	-0.316834	TUFM	1.32053	-0.356929
31.8343	31.8398	31.875	31.4471	31.4599	31.533					52	57551000000	3.62504	0.383989	-0.369718	-0.35908	PARP1	3.62504	-0.369718
26.9182	26.936	27.158	26.7889	26.4594	26.6428					6	2366300000	1.41877	0.428695	-0.373664	-0.33285	SNU13	1.41877	-0.373664
30.4404	30.6274	30.2669	30.0188	30.0624	30.1248					18	20399000000	1.59028	0.416697	-0.376232	-0.339387	RPS3A	1.59028	-0.376232
26.6174	26.4938	26.7491	26.136	26.3584	26.2269					14	1605400000	1.74647	0.406447	-0.379604	-0.345729	TEX10	1.74647	-0.379604
26.0242	26.0262	26.0772	25.8908	25.0633	26.0253					6	851070000	0.564129	0.499797	-0.382735	-0.294122	SNRPB2	0.564129	-0.382735
24.9293	25.9234	25.0377	24.8549	24.8619	25.0023					7	660350000	0.541405	0.496712	-0.390429	-0.29612	DIS3	0.541405	-0.390429
27.8964	27.8624	28.0065	27.3678	27.6349	27.5878					18	3906600000	1.86554	0.386091	-0.391572	-0.358223	RBM26	1.86554	-0.391572
27.1415	27.2312	26.9492	26.6084	26.8637	26.6531					11	2236100000	1.59693	0.386814	-0.398909	-0.35791	CMAS	1.59693	-0.398909
28.2592	28.4404	28.2925	27.8128	27.9525	28.0002					6	5330000000	2.17551	0.351119	-0.408808	-0.378824	RPS14	2.17551	-0.408808
25.924	22.6163	25.7909	24.2075	24.42	24.4724					3	453360000	0.140127	0.695895	-0.410427	-0.196935	STK26	0.140127	-0.410427
25.1981	24.7621	24.2641	24.6331	24.0144	24.321					5	513710000	0.576114	0.460381	-0.418617	-0.316281	POP1	0.576114	-0.418617
26.377	25.9769	26.3699	25.9298	25.7621	25.771					8	1398200000	1.37272	0.370223	-0.420322	-0.367745	EIF3B	1.37272	-0.420322
28.2721	28.3877	28.6369	28.1891	27.9413	27.8943					11	5698900000	1.39944	0.364163	-0.424006	-0.371531	HNRNPA1	1.39944	-0.424006
24.1512	23.9858	24.0719	23.8694	23.7193	23.3372					3	232260000	1.21439	0.370788	-0.427672	-0.36695	GTPBP6	1.21439	-0.427672
25.2003	25.3965	25.2341	24.6199	24.9206	24.9759					3	375370000	1.59399	0.333914	-0.438167	-0.389104	EXOSC8	1.59399	-0.438167
25.839	25.6522	25.6491	25.5196	25.1046	25.1894					4	853370000	1.4533	0.335814	-0.442225	-0.387467	CHTOP	1.4533	-0.442225
24.5021	24.3562	24.6854	24.2856	24.0291	23.8907					4	416970000	1.38881	0.335875	-0.446107	-0.387973	URB1	1.38881	-0.446107
29.2663	29.4495	29.2733	28.9944	28.7161	28.9321					21	10005000000	1.91155	0.303143	-0.448874	-0.406795	U2SURP	1.91155	-0.448874
24.7509	24.7386	24.6762	24.1634	24.3314	24.3083					2	381300000	2.8594	0.267718	-0.454231	-0.429563	RANBP1	2.8594	-0.454231
30.7737	30.7375	30.7364	30.3565	30.3179	30.2047					33	28327000000	3.19413	0.258699	-0.456196	-0.435646	DDX3X	3.19413	-0.456196
27.128	27.0884	27.1755	26.4846	26.9897	26.5365					6	2818600000	1.32709	0.322485	-0.460395	-0.396081	PRDX6	1.32709	-0.460395
24.4341	25.0868	25.2846	24.6982	24.2235	24.4194					3	535550000	0.771245	0.352701	-0.488187	-0.377989	RRP7A	0.771245	-0.488187
25.9868	26.0541	26.0636	25.4097	25.6203	25.5762					6	1112000000	2.72475	0.210528	-0.499407	-0.467377	ALKBH5	2.72475	-0.499407
24.6949	24.523	24.7494	23.9229	24.3628	24.1416					4	424930000	1.62774	0.237595	-0.513337	-0.44866	HPRT1	1.62774	-0.513337
24.8191	24.8447	24.8682	24.4784	24.374	24.1373					2	485920000	2.13937	0.210958	-0.51413	-0.466584	CCNB1	2.13937	-0.51413
26.8076	26.6734	26.3753	26.3551	26.0785	25.8624					6	1930600000	1.2743	0.257143	-0.520088	-0.436517	SAP18	1.2743	-0.520088
25.087	25.118	24.9624	24.4754	24.6612	24.4683					5	484600000	2.56078	0.192242	-0.520815	-0.482658	FIBP	2.56078	-0.520815
29.2524	29.1181	29.2584	28.8541	28.4803	28.7266					29	9034600000	1.93068	0.210856	-0.52265	-0.46711	THRAP3	1.93068	-0.52265
32.9802	32.8103	32.795	32.2635	32.4104	32.3364					19	109780000000	2.70466	0.184806	-0.525047	-0.489353	SLC25A5	2.70466	-0.525047
24.3477	24.715	21.6114	23.2216	22.602	23.2575					3	217620000	0.204707	0.557303	-0.531038	-0.265264	ERBIN	0.204707	-0.531038
27.1649	27.5643	27.402	27.0764	26.6276	26.8324					3	2732600000	1.42197	0.231939	-0.53159	-0.452797	DYNLL1	1.42197	-0.53159
26.5034	26.3459	26.4108	25.8733	25.8816	25.8575					4	1670500000	3.54035	0.14852	-0.549278	-0.52499	H2AFV	3.54035	-0.549278
29.4304	29.0173	29.0674	28.6257	28.5859	28.6504					18	7972100000	1.85988	0.186723	-0.551073	-0.487018	PSIP1	1.85988	-0.551073
25.1634	25.1014	25.4638	24.8174	24.65	24.6042					6	586990000	1.88805	0.184844	-0.552308	-0.489063	AAAS	1.88805	-0.552308
22.5805	21.8855	23.8539	22.7064	21.9803	21.9721					2	116110000	0.370448	0.414643	-0.553705	-0.340607	NUP35	0.370448	-0.553705
28.1729	28.1531	27.9308	27.4626	27.6473	27.4714					17	4341800000	2.32605	0.16607	-0.55846	-0.508525	RUVBL2	2.32605	-0.55846
23.4961	23.6082	23.5195	22.4795	23.6082	22.8501					4	178100000	0.775623	0.279252	-0.562007	-0.421324	INTS4	0.775623	-0.562007
25.5567	25.9655	25.5138	25.2575	25.3556	24.6984					3	488210000	1.07987	0.220359	-0.574842	-0.459785	PIK3R2	1.07987	-0.574842
26.2205	26.0694	25.9255	25.2993	25.7592	25.4156					7	1071100000	1.6346	0.174665	-0.580464	-0.499452	DDX51	1.6346	-0.580464
27.195	27.2761	27.4895	26.9124	26.4868	26.8028					10	2925700000	1.71312	0.166488	-0.586212	-0.507589	YWHAQ	1.71312	-0.586212
29.3671	29.4748	29.5468	28.8223	28.9377	28.8658					12	9014500000	3.15697	0.122608	-0.587608	-0.553241	PRDX1	3.15697	-0.587608
29.4625	29.4356	29.4616	28.9249	28.8312	28.835					48	11195000000	4.29932	0.11136	-0.589542	-0.571339	TOP2A	4.29932	-0.589542
27.6555	27.6842	27.6854	26.9212	27.2511	27.0531					5	2109500000	2.4694	0.128677	-0.599942	-0.547197	DLST	2.4694	-0.599942
25.9751	25.3264	25.6808	25.1643	25.0176	24.9763					11	870050000	1.44203	0.165904	-0.608058	-0.508411	EPB41L3	1.44203	-0.608058
25.2175	26.2759	24.4604	24.6511	24.684	24.7562					2	552900000	0.516511	0.303488	-0.620787	-0.406432	C11orf98	0.516511	-0.620787
25.8336	25.5746	25.0831	25.2585	24.7499	24.6168					5	993990000	0.990722	0.193934	-0.622018	-0.480547	AKAP17A	0.990722	-0.622018
25.5357	25.4981	25.4434	24.8469	24.8722	24.8515					8	909500000	4.65898	0.0784105	-0.635547	-0.61831	EPRS	4.65898	-0.635547
25.4757	26.4602	25.5904	24.8658	25.5546	25.197					5	786080000	0.796655	0.2135	-0.636349	-0.464823	CCT8	0.796655	-0.636349
27.7904	27.7029	27.6822	26.9996	27.1821	27.0842					8	2832000000	3.28718	0.0906738	-0.636594	-0.599272	MPG	3.28718	-0.636594
26.0023	26.2265	26.1285	25.4887	25.4514	25.4844					5	973000000	3.21065	0.0885813	-0.644246	-0.60438	SON	3.21065	-0.644246
25.0666	25.106	24.921	24.6028	24.3878	24.1532					5	465060000	1.99676	0.111786	-0.649955	-0.5694	LDHB	1.99676	-0.649955
29.0827	28.9862	29.2588	28.6486	28.2828	28.4403					9	9125800000	2.09947	0.107662	-0.652042	-0.575683	RPL32	2.09947	-0.652042
25.5221	22.0029	24.2234	23.3309	23.2128	23.2417					3	219840000	0.252536	0.449919	-0.654352	-0.322644	TUBG1	0.252536	-0.654352
29.0656	28.8756	29.0531	28.3108	28.3924	28.3131					17	7384700000	3.2243	0.0786085	-0.659343	-0.617964	PRPF4B	3.2243	-0.659343
26.5455	25.7538	26.1972	25.5347	25.6393	25.3417					6	1188800000	1.26411	0.143996	-0.660293	-0.530311	PARP2	1.26411	-0.660293
28.8041	28.7454	28.5954	28.1463	28.0363	27.9626					16	5534000000	2.90661	0.0805397	-0.666604	-0.61614	RCC2	2.90661	-0.666604
27.6448	27.735	27.6007	26.7213	26.9932	27.2619					10	2655300000	1.84579	0.107671	-0.668015	-0.575391	SCAF4	1.84579	-0.668015
29.9768	30.1465	29.855	29.1399	29.3417	29.4805					8	12305000000	2.17603	0.0943162	-0.672045	-0.594691	RPL24	2.17603	-0.672045
28.5966	28.7503	28.7182	28.0825	27.8122	28.126					14	5963500000	2.48018	0.0819197	-0.681462	-0.614619	ELAVL1	2.48018	-0.681462
27.7014	28.0415	27.9019	27.3496	26.8127	27.4217					5	2889300000	1.4747	0.114135	-0.686914	-0.564907	RPL37A	1.4747	-0.686914
27.8979	27.9999	27.4399	27.3158	26.887	27.0242					7	2325500000	1.52122	0.105202	-0.703533	-0.579704	DNAJA1	1.52122	-0.703533
25.4827	25.8095	26.1126	25.4949	25.1423	24.6339					5	1126200000	1.08174	0.130848	-0.71121	-0.543289	RNF2	1.08174	-0.71121
29.8301	29.8203	29.8318	29.2955	28.9425	29.1054					12	13838000000	2.656	0.0641295	-0.712924	-0.646911	SRRM1	2.656	-0.712924
30.6724	30.6597	30.5593	29.9342	29.8368	29.9599			+	SS18-SSX2_GFP	42	19516000000	3.80845	0.0486582	-0.720146	-0.684668	SRRM2	3.80845	-0.720146
26.8292	25.6102	25.5682	24.8708	25.5544	25.3986					10	1100100000	0.720079	0.176554	-0.727923	-0.497776	BAZ1B	0.720079	-0.727923
29.3859	29.6508	29.541	28.8458	28.6677	28.8646					6	10973000000	2.74779	0.0555165	-0.733225	-0.667046	RPL27A	2.74779	-0.733225
25.962	25.3675	26.1029	24.8176	25.2317	25.1812					5	699410000	1.31973	0.103287	-0.733943	-0.582316	PAK1IP1	1.31973	-0.733943
25.8026	25.3971	25.7465	25.0026	24.9289	24.8123					2	540240000	2.2165	0.0652829	-0.734082	-0.644823	MAFB	2.2165	-0.734082
29.4044	29.4568	29.0973	28.552	28.5659	28.6366					9	10135000000	2.5093	0.0582142	-0.734684	-0.658826	SRSF3	2.5093	-0.734684
25.6918	25.7524	26.0068	24.8871	25.2001	25.153					5	662370000	2.23718	0.0636872	-0.73698	-0.6481	PES1	2.23718	-0.73698
27.7073	27.8498	27.4909	26.7437	26.9726	27.0997					7	2775300000	2.13984	0.0636197	-0.744029	-0.648434	CPNE3	2.13984	-0.744029
28.5307	28.3939	28.5545	27.8126	27.7282	27.6815			+	SS18-SSX2_GFP	6	4996500000	3.54867	0.0416009	-0.752257	-0.707641	RNPS1	3.54867	-0.752257
25.7694	25.5669	25.8983	24.4231	25.0639	25.4894					6	652470000	1.09032	0.112348	-0.752698	-0.568257	TAF15	1.09032	-0.752698
26.3454	26.4586	26.2799	25.5103	25.7331	25.5794			+	SS18-SSX2_GFP	7	1141700000	3.06808	0.0441761	-0.753704	-0.69528	DDX31	3.06808	-0.753704
26.7379	26.9987	26.7965	26.2699	25.8977	26.0589					9	1700100000	2.34453	0.0513532	-0.76886	-0.678236	EBNA1BP2	2.34453	-0.76886
28.8737	28.9638	28.7782	28.2971	27.9707	28.0164			+	SS18-SSX2_GFP	23	6106800000	2.59851	0.0437863	-0.777191	-0.696875	NAT10	2.59851	-0.777191
29.8879	29.9822	30.1407	29.3685	29.1342	29.1452			+	SS18-SSX2_GFP	10	12235000000	2.75457	0.0408208	-0.787627	-0.712055	RPS11	2.75457	-0.787627
24.8488	24.7302	25.0678	24.2285	24.0919	23.9594			+	SS18-SSX2_GFP	5	386570000	2.4827	0.0426371	-0.788997	-0.700883	CSNK1A1	2.4827	-0.788997
26.0291	26.1141	26.2398	25.3529	25.4598	25.1917			+	SS18-SSX2_GFP	8	1047800000	2.87855	0.0381308	-0.79287	-0.721392	IWS1	2.87855	-0.79287
31.5529	30.7901	30.9389	30.2141	30.4363	30.2192					9	27571000000	1.51829	0.0643344	-0.804125	-0.646047	RPS13	1.51829	-0.804125
27.7901	28.1449	27.9362	27.284	27.1039	27.0103			+	SS18-SSX2_GFP	9	3170400000	2.49215	0.0363158	-0.824332	-0.729125	NME2	2.49215	-0.824332
27.1493	27.207	26.9502	26.3587	26.1352	26.336			+	SS18-SSX2_GFP	13	2297500000	2.84393	0.0316759	-0.825516	-0.746836	SAFB	2.84393	-0.825516
30.6761	30.848	30.8311	29.9688	29.9053	29.9484			+	SS18-SSX2_GFP	29	19901000000	3.89353	0.0235985	-0.844237	-0.798108	TOP1	3.89353	-0.844237
27.8623	27.4778	27.512	26.7758	26.7419	26.7227			+	SS18-SSX2_GFP	6	2689000000	2.66595	0.0271693	-0.870558	-0.774624	CPSF6	2.66595	-0.870558
28.4458	28.0393	28.2266	27.2213	27.4817	27.3914			+	SS18-SSX2_GFP	5	4015500000	2.47012	0.0291212	-0.8724	-0.765194	TXN	2.47012	-0.8724
26.8948	27.0261	26.9127	26.0587	26.0619	26.0867			+	SS18-SSX2_GFP	8	1914800000	4.50217	0.0162266	-0.875436	-0.840106	SF1	4.50217	-0.875436
30.1951	29.8886	30.0625	29.1776	29.0334	29.2546			+	SS18-SSX2_GFP	8	11549000000	2.90484	0.0224716	-0.893529	-0.805053	RPL23A	2.90484	-0.893529
24.266	24.7931	24.4177	23.5945	23.5383	23.6306			+	SS18-SSX2_GFP	2	258590000	2.32704	0.0261238	-0.904501	-0.780454	C9orf114	2.32704	-0.904501
27.962	27.9586	27.8734	27.072	26.8761	27.1123			+	SS18-SSX2_GFP	7	3081400000	3.50187	0.0156185	-0.911198	-0.84487	ZNF207	3.50187	-0.911198
26.771	26.7229	27.0036	25.9011	26.0958	25.7641			+	SS18-SSX2_GFP	7	1358500000	2.66923	0.0217338	-0.912165	-0.80758	ABCF2	2.66923	-0.912165
22.2433	22.7954	24.1379	22.0599	22.2626	22.0924					2	88003000	0.746612	0.0990799	-0.920555	-0.587818	JAK1	0.746612	-0.920555
30.1246	30.2154	30.0608	29.339	28.8318	29.3587			+	SS18-SSX2_GFP	27	15962000000	2.23645	0.0200967	-0.957111	-0.812361	BCLAF1	2.23645	-0.957111
28.6639	28.6088	28.7693	27.7551	27.7503	27.6413			+	SS18-SSX2_GFP	16	5529400000	4.05883	0.00910891	-0.965092	-0.91047	DDX52	4.05883	-0.965092
28.6922	28.6742	28.5946	27.8013	27.6577	27.5866			+	SS18-SSX2_GFP	8	4814300000	3.80919	0.00934085	-0.971776	-0.908292	NUDT21	3.80919	-0.971776
28.9798	28.7748	28.5904	27.9874	27.5601	27.8286			+	SS18-SSX2_GFP	12	4585300000	2.38208	0.0153555	-0.989622	-0.847313	PNN	2.38208	-0.989622
28.2176	28.3456	28.4389	27.4164	27.2888	27.3205			+	SS18-SSX2_GFP	11	4220000000	3.72984	0.0074359	-0.992144	-0.923135	NOP58	3.72984	-0.992144
28.1436	27.8596	27.9614	26.9303	27.002	26.9983			+	SS18-SSX2_GFP	6	2850000000	3.5189	0.00718273	-1.01135	-0.931038	RAN	3.5189	-1.01135
28.5804	28.6263	28.6436	27.4496	27.5696	27.7323			+	SS18-SSX2_GFP	21	4237000000	3.59901	0.00515959	-1.03294	-0.952853	DDX50	3.59901	-1.03294
26.8247	25.9937	26.4363	25.0296	25.5918	25.5042			+	SS18-SSX2_GFP	7	983760000	1.60914	0.0227557	-1.04302	-0.804262	NOC4L	1.60914	-1.04302
30.2515	30.061	29.9204	29.1319	28.9677	28.9953			+	SS18-SSX2_GFP	14	11903000000	3.18834	0.00634783	-1.046	-0.943589	FBL	3.18834	-1.046
25.8633	25.6298	25.86	24.6944	24.7104	24.7853			+	SS18-SSX2_GFP	5	689800000	3.67162	0.00412575	-1.05437	-0.974278	MCM4	3.67162	-1.05437
25.6721	25.522	25.7798	24.7833	24.1982	24.8169			+	SS18-SSX2_GFP	5	448490000	2.10656	0.013951	-1.05852	-0.871688	MRPL22	2.10656	-1.05852
25.9086	25.9015	25.9285	24.8206	25.0708	24.6705			+	SS18-SSX2_GFP	5	883740000	3.08284	0.00603499	-1.05893	-0.947996	MCM7	3.08284	-1.05893
25.4602	26.286	25.8762	25.0183	24.7417	24.636			+	SS18-SSX2_GFP	4	642730000	1.81764	0.0152781	-1.07551	-0.850724	CXorf56	1.81764	-1.07551
29.9628	29.8494	29.6817	28.6217	28.826	28.8026			+	SS18-SSX2_GFP	5	9456000000	3.31451	0.00400602	-1.08125	-0.979328	RPL35	3.31451	-1.08125
29.7545	29.9149	29.6064	29.1079	28.1647	28.7152			+	SS18-SSX2_GFP	4	14376000000	1.72246	0.0152985	-1.09598	-0.851121	H3F3B	1.72246	-1.09598
25.3154	25.1187	25.3353	22.6529	24.9038	24.8847					3	546890000	0.670865	0.071163	-1.10931	-0.633773	QKI	0.670865	-1.10931
28.7484	28.6983	28.7068	27.5091	27.6786	27.4788			+	SS18-SSX2_GFP	17	4812500000	4.2651	0.001962	-1.16234	-1.09234	DDX56	4.2651	-1.16234
29.3196	29.7114	29.5374	28.3741	28.4434	28.2423			+	SS18-SSX2_GFP	6	7371900000	3.1023	0.002368	-1.16957	-1.03709	RPS24	3.1023	-1.16957
26.0488	25.9502	25.8572	24.7631	24.8568	24.6986			+	SS18-SSX2_GFP	6	721450000	4.09248	0.00180736	-1.17925	-1.10017	CACTIN	4.09248	-1.17925
26.7627	26.9414	26.5482	25.5768	25.5989	25.4873			+	SS18-SSX2_GFP	7	1348500000	3.26373	0.00206667	-1.19646	-1.06952	PRPF38A	3.26373	-1.19646
29.4781	29.3745	29.4973	28.1584	28.3244	28.2761			+	SS18-SSX2_GFP	14	6847000000	4.36303	0.00186618	-1.197	-1.12676	GNL3	4.36303	-1.197
25.8123	25.8785	25.8101	24.4895	24.6206	24.7525			+	SS18-SSX2_GFP	3	612500000	3.97501	0.00185612	-1.21278	-1.12381	MRPL48	3.97501	-1.21278
28.7645	28.5921	28.3525	27.4113	27.1135	27.4682			+	SS18-SSX2_GFP	3	4277800000	2.79984	0.0020462	-1.23871	-1.06567	RPS26P11	2.79984	-1.23871
29.194	29.1539	29.175	27.9229	27.6755	28.164			+	SS18-SSX2_GFP	18	5802200000	3.04755	0.00179478	-1.25352	-1.09815	NOLC1	3.04755	-1.25352
29.8447	29.5669	29.537	28.3067	28.3182	28.5544			+	SS18-SSX2_GFP	5	10787000000	3.23294	0.0018363	-1.25642	-1.11489	ERH	3.23294	-1.25642
26.4331	26.5922	27.1195	25.5959	25.272	25.497			+	SS18-SSX2_GFP	15	1493700000	2.27734	0.00283912	-1.25998	-1.02561	HELLS	2.27734	-1.25998
26.7016	26.7751	26.6644	25.4003	25.2163	25.7217			+	SS18-SSX2_GFP	5	1079200000	2.9554	0.00181371	-1.26756	-1.10105	TFAM	2.9554	-1.26756
30.8809	30.9961	30.9867	29.7632	29.601	29.6944			+	SS18-SSX2_GFP	12	18134000000	4.53461	0.00130709	-1.26834	-1.19679	RPS8	4.53461	-1.26834
29.7158	29.6184	29.7804	28.482	28.4347	28.3592			+	SS18-SSX2_GFP	24	9031500000	4.56927	0.00132271	-1.27958	-1.20816	PUM3	4.56927	-1.27958
25.4516	25.2188	25.2196	23.886	24.1524	23.9901			+	SS18-SSX2_GFP	3	482590000	3.52218	0.0012552	-1.28716	-1.16004	CFAP20	3.52218	-1.28716
30.9408	30.9242	30.6513	29.3459	29.5636	29.699			+	SS18-SSX2_GFP	14	18418000000	3.13849	0.00139518	-1.30258	-1.14339	RPS18	3.13849	-1.30258
27.1437	26.5142	26.5524	25.1661	25.2843	25.8475			+	SS18-SSX2_GFP	9	1319300000	1.95054	0.00311656	-1.30409	-1.00877	YY1	1.95054	-1.30409
25.0172	25.3617	24.3694	22.1924	24.2521	24.3812			+	SS18-SSX2_GFP	4	503220000	0.787318	0.0330288	-1.30752	-0.740225	HNRNPUL2-BSCL2	0.787318	-1.30752
28.4118	28.2013	28.1017	26.5159	27.2468	26.9416			+	SS18-SSX2_GFP	4	1744000000	2.35485	0.00193197	-1.33685	-1.08615	THYN1	2.35485	-1.33685
27.65	28.2436	28.3128	26.752	26.5611	26.8561			+	SS18-SSX2_GFP	12	3008600000	2.38902	0.00179167	-1.34569	-1.09638	TCOF1	2.38902	-1.34569
28.9777	29.0174	29.0557	27.9668	27.482	27.5474			+	SS18-SSX2_GFP	11	5590500000	3.03695	0.00128682	-1.35156	-1.17168	BUB3	3.03695	-1.35156
25.3754	24.5114	24.5449	23.1208	23.5534	23.6784			+	SS18-SSX2_GFP	3	309040000	1.83878	0.00282575	-1.3597	-1.02292	RPP25L	1.83878	-1.3597
29.0271	29.2233	28.8288	27.8721	27.3667	27.7482			+	SS18-SSX2_GFP	4	4603300000	2.70035	0.00139777	-1.36405	-1.14626	RPL36A	2.70035	-1.36405
29.1727	29.1321	29.33	27.8059	27.8937	27.8162			+	SS18-SSX2_GFP	22	5480900000	4.49094	0.000648188	-1.37298	-1.28751	EEF2	4.49094	-1.37298
24.485	25.013	25.9546	24.1749	23.4506	23.659			+	SS18-SSX2_GFP	5	428330000	1.35116	0.00675145	-1.38939	-0.938326	GSN	1.35116	-1.38939
28.6571	28.5833	28.745	27.27	27.2134	27.3311			+	SS18-SSX2_GFP	19	3977900000	4.75213	0.000201313	-1.39032	-1.31438	HSPA5	4.75213	-1.39032
24.9437	24.8744	25.4204	23.0317	23.9688	24.0631			+	SS18-SSX2_GFP	3	274490000	1.69952	0.00297054	-1.39165	-1.01487	RPP40	1.69952	-1.39165
23.8378	23.9036	24.0067	23.3766	21.7846	22.4095			+	SS18-SSX2_GFP	1	131980000	1.39428	0.00584526	-1.39242	-0.950007	MAP2K2	1.39428	-1.39242
26.3437	25.8962	25.2968	24.3533	24.2819	24.7058			+	SS18-SSX2_GFP	5	425810000	1.87507	0.00239482	-1.39858	-1.05127	NSUN2	1.87507	-1.39858
28.5226	28.3609	28.2686	27.1771	26.8777	26.8636			+	SS18-SSX2_GFP	5	2875300000	3.43672	0.000864865	-1.41122	-1.25291	SRP9	3.43672	-1.41122
28.2518	28.1644	28.007	26.8695	26.6715	26.6396			+	SS18-SSX2_GFP	10	2642100000	3.81324	0.000645435	-1.41418	-1.2839	PRPF38B	3.81324	-1.41418
28.9491	29.1777	28.9044	27.7438	27.5718	27.472			+	SS18-SSX2_GFP	20	5318100000	3.58499	0.000872117	-1.41453	-1.26744	DDX54	3.58499	-1.41453
24.175	25.4956	24.1768	22.7703	22.4763	24.3022			+	SS18-SSX2_GFP	4	101430000	0.934504	0.0167572	-1.43287	-0.834583	SP2	0.934504	-1.43287
30.1422	30.9729	30.8005	29.1538	29.0825	29.3563			+	SS18-SSX2_GFP	8	15074000000	2.24946	0.0017417	-1.44099	-1.13819	RPS6	2.24946	-1.44099
26.234	26.0443	26.0603	24.8279	24.5376	24.6137			+	SS18-SSX2_GFP	5	617150000	3.78481	0.000200873	-1.45311	-1.31382	NTPCR	3.78481	-1.45311
28.2183	28.1037	28.0617	26.5427	26.7664	26.6701			+	SS18-SSX2_GFP	10	2793400000	4.28685	0.000210526	-1.4682	-1.35954	DDX47	4.28685	-1.4682
24.7667	24.6979	24.6481	22.3393	23.8057	23.5324			+	SS18-SSX2_GFP	3	332210000	1.51333	0.00280374	-1.47842	-1.01852	BYSL	1.51333	-1.47842
28.9321	28.9021	29.0275	27.5084	27.4552	27.3928			+	SS18-SSX2_GFP	7	4232100000	5.11977	0.000229426	-1.50176	-1.42962	SRSF11	5.11977	-1.50176
25.9695	26.4323	25.1331	24.3892	24.2225	24.393			+	SS18-SSX2_GFP	4	558560000	1.76659	0.00194854	-1.51009	-1.09084	ZRANB2	1.76659	-1.51009
25.608	25.2708	24.1751	23.8083	22.8475	23.8606			+	SS18-SSX2_GFP	3	317860000	1.30356	0.00401205	-1.51251	-0.979825	POP4	1.30356	-1.51251
29.3894	29.2708	29.1914	27.6475	27.8823	27.7818			+	SS18-SSX2_GFP	15	5792100000	4.15227	0.000218009	-1.51333	-1.38954	DDX18	4.15227	-1.51333
24.0604	24.0038	24.0357	23.1303	21.8486	22.4672			+	SS18-SSX2_GFP	3	52299000	1.85917	0.00172578	-1.55126	-1.13196	FLG2	1.85917	-1.55126
26.8195	26.3971	26.576	24.9567	25.0872	25.0508			+	SS18-SSX2_GFP	5	863600000	3.58559	0.000216981	-1.56596	-1.38774	PPIA	3.58559	-1.56596
28.7794	29.7176	30.7312	28.118	28.5097	27.8904			+	SS18-SSX2_GFP	13	5104300000	1.24544	0.00389713	-1.57008	-0.986292	SRBD1	1.24544	-1.57008
29.5696	29.4789	29.5894	28.0714	27.8347	27.9773			+	SS18-SSX2_GFP	6	6165600000	4.48827	0.000240209	-1.58482	-1.47186	TMA16	4.48827	-1.58482
25.3037	25.7438	26.0118	24.8162	24.6396	22.8219			+	SS18-SSX2_GFP	3	409860000	1.1188	0.00503682	-1.59385	-0.954429	MRPL9	1.1188	-1.59385
25.1	25.3186	24.1995	23.9217	21.9891	23.9123			+	SS18-SSX2_GFP	1	84924000	1.03065	0.00728	-1.59832	-0.924843	HRNR	1.03065	-1.59832
28.1044	28.0572	28.1557	26.3416	26.7124	26.4549			+	SS18-SSX2_GFP	4	2454900000	3.83817	0.000231156	-1.60279	-1.43962	EIF5A	3.83817	-1.60279
31.1224	31.2695	31.4456	29.5003	29.5663	29.8881			+	SS18-SSX2_GFP	10	32984000000	3.3666	0.000223301	-1.62758	-1.41295	HIST1H2BM	3.3666	-1.62758
28.8135	29.1401	28.6534	27.5077	27.244	26.9688			+	SS18-SSX2_GFP	13	3360500000	2.81585	0.000206278	-1.62882	-1.34453	RBBP6	2.81585	-1.62882
26.9742	26.4909	26.5943	25.1323	25.4546	24.5729			+	SS18-SSX2_GFP	7	971890000	2.27568	0.000868476	-1.63321	-1.25969	RRP8	2.27568	-1.63321
29.6793	29.7244	29.8081	27.885	28.0248	28.3368			+	SS18-SSX2_GFP	5	7385000000	3.54803	0.000234694	-1.65507	-1.45339	RPS15	3.54803	-1.65507
25.8732	26.1162	25.8406	23.7297	24.5854	24.5118			+	SS18-SSX2_GFP	4	592760000	2.35853	0.000653763	-1.66768	-1.29552	FAM207A	2.35853	-1.66768
26.8129	27.494	27.1794	25.1381	25.582	25.6139			+	SS18-SSX2_GFP	9	1103400000	2.63104	0.000213953	-1.7174	-1.37434	GAPDH	2.63104	-1.7174
28.2858	28.0616	28.0602	26.2682	26.6126	26.3075			+	SS18-SSX2_GFP	11	2089700000	3.71601	0.000262108	-1.73978	-1.5367	HP1BP3	3.71601	-1.73978
30.6492	30.7718	30.684	28.6202	29.0256	29.2111			+	SS18-SSX2_GFP	6	12175000000	3.2189	0.000245333	-1.74935	-1.48472	RPS23	3.2189	-1.74935
27.2007	27.3437	27.2735	25.3219	25.7204	25.3866			+	SS18-SSX2_GFP	11	1265700000	3.79617	0.000277946	-1.79633	-1.58941	MCM5	3.79617	-1.79633
27.1215	27.0504	27.1352	25.592	24.9439	25.3627			+	SS18-SSX2_GFP	11	1209100000	3.14865	0.000254144	-1.80283	-1.51302	NUSAP1	3.14865	-1.80283
24.7677	26.2026	25.5409	25.4376	23.9606	21.6996			+	SS18-SSX2_GFP	7	347770000	0.708167	0.0167353	-1.80452	-0.834134	BRD3	0.708167	-1.80452
24.9788	24.9644	25.1106	22.3296	24.0903	23.1812			+	SS18-SSX2_GFP	2	167050000	1.62755	0.00131225	-1.8176	-1.20332	SSBP1	1.62755	-1.8176
25.5399	24.3065	24.6647	23.3594	23.1527	22.5289			+	SS18-SSX2_GFP	5	155680000	1.83289	0.000870293	-1.82336	-1.26333	SERPINA3	1.83289	-1.82336
27.4686	27.4207	27.4398	25.6128	25.7516	25.4742			+	SS18-SSX2_GFP	6	1392100000	4.63797	0.000304636	-1.83015	-1.69261	MORF4L1	4.63797	-1.83015
25.9962	24.5483	25.5665	23.841	22.7401	24.0156			+	SS18-SSX2_GFP	4	377620000	1.45578	0.00124812	-1.83811	-1.15874	NOP16	1.45578	-1.83811
29.266	29.3529	29.5115	27.5559	27.5739	27.4492			+	SS18-SSX2_GFP	10	5770900000	4.64752	0.000307692	-1.85046	-1.71069	PCBP2	4.64752	-1.85046
32.5635	32.4847	32.4996	30.5896	30.7091	30.5714			+	SS18-SSX2_GFP	18	42213000000	5.55431	0.000340741	-1.89257	-1.80334	RPS4X	5.55431	-1.89257
26.3135	26.1876	26.2133	24.7727	24.2301	24.0139			+	SS18-SSX2_GFP	5	555140000	2.93812	0.00026361	-1.89927	-1.54543	EIF2S3	2.93812	-1.89927
26.9828	26.9923	26.5757	25.137	25.0138	24.6786			+	SS18-SSX2_GFP	6	968950000	3.22202	0.000280488	-1.90714	-1.59734	NTHL1	3.22202	-1.90714
27.2247	27.8113	27.8616	25.6921	25.8501	25.6331			+	SS18-SSX2_GFP	6	1625700000	3.0541	0.000274627	-1.90742	-1.57061	SNIP1	3.0541	-1.90742
29.7379	29.5598	29.6417	27.7657	27.6273	27.7998			+	SS18-SSX2_GFP	20	5876800000	4.8856	0.000327402	-1.91555	-1.78408	HSP90AB1	4.8856	-1.91555
25.482	24.955	24.826	23.1694	23.0408	23.3007			+	SS18-SSX2_GFP	1	279590000	3.0647	0.000277108	-1.91734	-1.5791	KLHDC1	3.0647	-1.91734
30.945	31.0194	30.8796	28.9074	29.1175	28.9519			+	SS18-SSX2_GFP	23	14328000000	4.87749	0.000344569	-1.95572	-1.81827	RSL1D1	4.87749	-1.95572
25.8856	26.5411	27.3553	24.6499	24.4757	24.7879			+	SS18-SSX2_GFP	3	466030000	1.96616	0.000211982	-1.95621	-1.36362	FGG	1.96616	-1.95621
24.9626	24.9096	26.9681	23.6666	23.6707	23.6094			+	SS18-SSX2_GFP	2	280550000	1.35474	0.00128433	-1.96456	-1.17093	PGLS	1.35474	-1.96456
30.64	30.7883	31.019	28.8225	28.9389	28.7574			+	SS18-SSX2_GFP	30	12519000000	4.06538	0.000320557	-1.97616	-1.76069	DDX41	4.06538	-1.97616
30.8822	30.7191	30.6498	28.8765	28.7098	28.717			+	SS18-SSX2_GFP	18	13052000000	4.64283	0.00034717	-1.98261	-1.82261	PUF60	4.64283	-1.98261
27.054	26.7322	26.4634	25.0064	24.7493	24.5248			+	SS18-SSX2_GFP	9	645880000	3.08015	0.00029393	-1.98971	-1.6306	WHSC1	3.08015	-1.98971
32.5868	32.4549	32.2855	30.4307	30.2954	30.5851			+	SS18-SSX2_GFP	15	41768000000	4.11174	0.000330935	-2.00534	-1.78909	HIST1H1E	4.11174	-2.00534
31.5664	31.5054	31.5107	29.6176	29.3966	29.4801			+	SS18-SSX2_GFP	43	19656000000	5.14211	0.000373984	-2.02942	-1.90143	DDX46	5.14211	-2.02942
28.1923	28.2077	28.2345	25.9262	26.4659	26.0805			+	SS18-SSX2_GFP	7	2046600000	3.66306	0.000322807	-2.05399	-1.76923	CMSS1	3.66306	-2.05399
27.4837	26.4782	26.6621	24.9737	24.7458	24.7165			+	SS18-SSX2_GFP	5	664500000	2.52748	0.000267442	-2.06263	-1.56304	HPX	2.52748	-2.06263
26.7021	26.7603	26.1664	24.7191	24.1859	24.4283			+	SS18-SSX2_GFP	5	648640000	2.99884	0.00030363	-2.09849	-1.68704	EMG1	2.99884	-2.09849
25.9786	25.24	24.9949	23.2945	22.0792	24.529			+	SS18-SSX2_GFP	2	178270000	1.28672	0.00129941	-2.10359	-1.19081	PON1	1.28672	-2.10359
26.8558	27.0561	27.0122	25.1846	24.732	24.6823			+	SS18-SSX2_GFP	6	845760000	3.60473	0.000336996	-2.10841	-1.80056	TFB1M	3.60473	-2.10841
31.9856	31.9157	31.8517	29.7323	29.8497	29.8326			+	SS18-SSX2_GFP	12	26960000000	5.6181	0.000410714	-2.11283	-2.00602	EEF1A1P5	5.6181	-2.11283
25.7157	27.0611	25.4129	23.5653	23.9567	24.2458			+	SS18-SSX2_GFP	4	508500000	1.76992	0.000215962	-2.14061	-1.38681	MTHFD2	1.76992	-2.14061
27.2857	27.3709	27.4651	25.4526	24.8799	25.2868			+	SS18-SSX2_GFP	5	1225400000	3.58477	0.00035249	-2.16752	-1.84024	PPIG	3.58477	-2.16752
24.8525	25.1147	24.9006	23.0981	22.5578	22.6147			+	SS18-SSX2_GFP	2	128520000	3.50239	0.000353846	-2.19909	-1.84889	CFB	3.50239	-2.19909
26.9997	27.7765	27.377	26.1792	24.3665	25.0059			+	SS18-SSX2_GFP	15	1007700000	1.7259	0.000220096	-2.20055	-1.39608	HIST1H1C	1.7259	-2.20055
26.7643	27.0376	26.9943	24.7913	24.3924	24.9706			+	SS18-SSX2_GFP	7	716570000	3.50169	0.000363636	-2.21398	-1.85928	RPUSD3	3.50169	-2.21398
26.6367	25.3079	26.7218	23.9516	23.9985	24.022			+	SS18-SSX2_GFP	11	528320000	2.08502	0.000259155	-2.23144	-1.53023	HSP90AA1	2.08502	-2.23144
25.8953	25.2812	24.8018	23.5855	23.3516	22.1962			+	SS18-SSX2_GFP	3	345310000	1.89015	0.000245989	-2.28168	-1.48792	RRP1	1.89015	-2.28168
28.6204	28.6411	28.6485	26.416	26.3622	26.2717			+	SS18-SSX2_GFP	9	2137100000	6.12786	0.000494624	-2.28672	-2.19255	TSR3	6.12786	-2.28672
26.7682	26.0072	26.2249	23.7839	24.362	23.9293			+	SS18-SSX2_GFP	4	608870000	2.89715	0.000333333	-2.30837	-1.79605	SNX9	2.89715	-2.30837
27.4283	26.8845	27.046	24.8792	24.6671	24.8647			+	SS18-SSX2_GFP	9	1032000000	3.72353	0.000393162	-2.31593	-1.97076	MCM6	3.72353	-2.31593
25.3247	24.8903	25.1099	22.5517	22.3877	23.4111			+	SS18-SSX2_GFP	3	311410000	2.61507	0.000311864	-2.32481	-1.73332	LDHA	2.61507	-2.32481
31.8518	32.3362	32.3911	29.7277	29.9373	29.939			+	SS18-SSX2_GFP	9	28392000000	3.63556	0.000384937	-2.32502	-1.96178	RPL23	3.63556	-2.32502
27.6979	27.7184	27.4725	25.4951	25.3346	25.0665			+	SS18-SSX2_GFP	4	1085600000	4.02498	0.000425926	-2.33086	-2.03076	YBX1	4.02498	-2.33086
27.5305	27.1284	29.2186	25.6658	25.6255	25.5212			+	SS18-SSX2_GFP	2	1409100000	1.66961	0.00023	-2.35501	-1.43444	VPS13A	1.66961	-2.35501
26.3578	25.2139	25.2639	24.189	24.2014	21.2883			+	SS18-SSX2_GFP	1	254950000	1.08003	0.00127692	-2.38564	-1.17036	LRP1	1.08003	-2.38564
28.4689	28.437	28.3136	26.034	26.1267	25.8874			+	SS18-SSX2_GFP	7	2044100000	5.03737	0.000505495	-2.39047	-2.20475	RPL7L1	5.03737	-2.39047
26.3066	25.7107	25.5579	23.254	23.4066	23.6543			+	SS18-SSX2_GFP	2	361420000	3.15302	0.000381743	-2.42013	-1.92616	TRMT112	3.15302	-2.42013
31.541	31.5788	31.6148	29.1726	29.1919	29.0943			+	SS18-SSX2_GFP	15	18760000000	6.50487	0.000593548	-2.42524	-2.33948	PCBP1	6.50487	-2.42524
27.0155	27.0354	26.8658	24.7292	24.5146	24.3748			+	SS18-SSX2_GFP	6	826790000	4.51341	0.000489362	-2.43272	-2.17965	NOL7	4.51341	-2.43272
29.4737	29.4263	29.4031	27.155	27.0958	26.739			+	SS18-SSX2_GFP	6	4432900000	4.30171	0.000471795	-2.43775	-2.15433	SRP14	4.30171	-2.43775
25.3511	27.6535	25.3672	23.5339	23.7595	23.6831			+	SS18-SSX2_GFP	4	490520000	1.48743	0.000219048	-2.4651	-1.39456	HBA1;	1.48743	-2.4651
29.6592	29.7239	29.6222	27.3747	27.0912	27.1018			+	SS18-SSX2_GFP	15	5321600000	4.84893	0.000541176	-2.4792	-2.25911	SREK1	4.84893	-2.4792
24.6009	24.8194	27.2814	23.0436	23.1285	23.0242			+	SS18-SSX2_GFP	2	323870000	1.35936	0.000206742	-2.50179	-1.34506	RPTOR	1.35936	-2.50179
28.4565	26.9485	28.6912	26.2537	25.81	24.506			+	SS18-SSX2_GFP	7	1102600000	1.52944	0.000228288	-2.50881	-1.42782	A2M	1.52944	-2.50881
28.8578	28.9265	29.0257	26.4887	26.3813	26.3304			+	SS18-SSX2_GFP	23	2470300000	5.52484	0.00062585	-2.53658	-2.37629	DDX28	5.52484	-2.53658
31.8966	31.9635	31.8828	29.463	29.2292	29.3388			+	SS18-SSX2_GFP	17	22084000000	5.43463	0	-2.57065	-2.39796	LUC7L	5.43463	-2.57065
27.1272	27.1961	27.5991	24.5111	24.8751	24.7457			+	SS18-SSX2_GFP	5	896440000	3.85656	0.0005	-2.59686	-2.19762	PCMT1	3.85656	-2.59686
27.064	26.3929	26.9319	24.5154	23.7438	24.3095			+	SS18-SSX2_GFP	5	666970000	2.96721	0.000401747	-2.60674	-1.99173	SFSWAP	2.96721	-2.60674
24.9836	25.3627	25.4997	22.9484	22.1877	22.8414			+	SS18-SSX2_GFP	2	122200000	3.11993	0.000429907	-2.62284	-2.04354	FGB	3.11993	-2.62284
28.0213	27.693	28.0042	25.0067	25.2775	25.378			+	SS18-SSX2_GFP	13	1551000000	4.19854	0.000582278	-2.68542	-2.32728	NSUN5	4.19854	-2.68542
33.965	33.7568	33.8292	31.1492	31.055	31.1728			+	SS18-SSX2_GFP	13	89815000000	5.56413	0	-2.72471	-2.54447	U2AF1	5.56413	-2.72471
30.8538	30.7614	30.7405	28.0296	28.1029	28.0343			+	SS18-SSX2_GFP	21	9926800000	6.46965	0	-2.7296	-2.61932	GLYR1	6.46965	-2.7296
28.685	28.9454	28.8303	26.1041	25.9981	26.0388			+	SS18-SSX2_GFP	8	2300800000	5.35323	0	-2.77316	-2.56436	NIFK	5.35323	-2.77316
28.3941	28.7849	28.692	25.7574	25.7912	25.9799			+	SS18-SSX2_GFP	9	1971300000	4.46247	0	-2.78081	-2.44639	NKAP	4.46247	-2.78081
31.4236	31.0366	31.2225	28.5651	28.572	28.1744			+	SS18-SSX2_GFP	26	11301000000	4.06829	0.000630137	-2.79038	-2.37985	ALB	4.06829	-2.79038
25.2068	25.1716	25.0205	22.4354	22.1701	22.3833			+	SS18-SSX2_GFP	2	102510000	5.02902	0	-2.80335	-2.5502	GDI2	5.02902	-2.80335
28.8119	28.8457	28.5642	26.0286	25.897	25.8636			+	SS18-SSX2_GFP	2	2200500000	4.98624	0	-2.81086	-2.55064	HBD	4.98624	-2.81086
26.0313	25.818	25.8207	23.12	23.0727	22.9248			+	SS18-SSX2_GFP	4	331100000	5.19103	0	-2.85085	-2.61085	ZNF146	5.19103	-2.85085
30.4703	30.3281	30.4873	27.5785	27.5859	27.4164			+	SS18-SSX2_GFP	11	7453000000	5.57673	0	-2.90169	-2.69953	MMTAG2	5.57673	-2.90169
34.5251	34.5814	34.6741	31.8454	31.5938	31.6332			+	SS18-SSX2_GFP	21	139980000000	5.27058	0	-2.90272	-2.66453	U2AF2	5.27058	-2.90272
24.9063	24.6986	24.8991	22.3263	22.1881	21.272			+	SS18-SSX2_GFP	2	83727000	2.99879	0.000481675	-2.9059	-2.17225	ANXA5	2.99879	-2.9059
30.7106	30.7686	30.3837	27.7744	27.2524	28.0774			+	SS18-SSX2_GFP	16	7824500000	3.3877	0.000564417	-2.91957	-2.30051	MAZ	3.3877	-2.91957
26.4889	26.3159	26.1185	22.6575	22.8884	24.5928			+	SS18-SSX2_GFP	2	703970000	2.03949	0.000342007	-2.92816	-1.80797	H1F0	2.03949	-2.92816
28.4807	28.4755	28.5856	25.7912	25.3891	25.5704			+	SS18-SSX2_GFP	16	2244500000	4.75391	0	-2.93035	-2.61251	SLIT2	4.75391	-2.93035
34.0862	34.2704	34.0496	31.1407	30.9988	31.2504			+	SS18-SSX2_GFP	20	94280000000	5.13919	0	-3.00541	-2.73255	LUC7L2	5.13919	-3.00541
27.9616	28.6684	28.6659	25.1621	25.4921	25.6143			+	SS18-SSX2_GFP	8	1635100000	3.42562	0.00061745	-3.00913	-2.36716	PRPS1	3.42562	-3.00913
29.975	30.036	30.0765	27.0681	26.9701	26.9507			+	SS18-SSX2_GFP	8	4763600000	6.46849	0	-3.03287	-2.89724	RP9	6.46849	-3.03287
35.1878	35.1892	35.1702	32.1856	32.0889	32.0438			+	SS18-SSX2_GFP	30	193250000000	6.67059	0	-3.07633	-2.95158	RBM39	6.67059	-3.07633
33.068	33.1771	33.2182	29.9955	30.0716	30.1456			+	SS18-SSX2_GFP	20	44817000000	6.00027	0	-3.08349	-2.90255	LUC7L3	6.00027	-3.08349
25.8464	25.5637	25.3497	22.6094	23.639	21.2			+	SS18-SSX2_GFP	3	190380000	1.89888	0.000339483	-3.10378	-1.80304	FAM76B	1.89888	-3.10378
26.3852	27.024	25.8466	23.5866	22.9704	23.1447			+	SS18-SSX2_GFP	6	412260000	2.92668	0.000560976	-3.18469	-2.2968	KDM4D	2.92668	-3.18469
28.5154	28.3098	28.5798	25.3182	25.5099	24.8682			+	SS18-SSX2_GFP	12	1849100000	4.01082	0	-3.23623	-2.68147	TRMT10C	4.01082	-3.23623
30.1363	30.1012	30.0401	26.7867	26.9321	26.7144			+	SS18-SSX2_GFP	12	5095900000	5.90883	0	-3.28147	-3.067	DIMT1	5.90883	-3.28147
26.0524	26.7686	26.5168	22.4358	23.3729	23.5092			+	SS18-SSX2_GFP	4	332520000	2.96033	0	-3.33994	-2.39032	CP	2.96033	-3.33994
29.2158	29.5634	29.2717	26.2579	25.825	25.7178			+	SS18-SSX2_GFP	9	2869400000	4.18666	0	-3.41672	-2.85404	RBMX2	4.18666	-3.41672
28.2022	28.2625	27.9233	24.5804	24.8619	24.5302			+	SS18-SSX2_GFP	9	1251600000	4.72141	0	-3.47185	-3.02721	CWC25	4.72141	-3.47185
30.7652	30.8991	30.5794	27.4768	27.095	27.25			+	SS18-SSX2_GFP	15	8794200000	4.75022	0	-3.47398	-3.03526	PHF6	4.75022	-3.47398
27.5325	27.5347	27.9967	23.0826	24.1643	25.3697			+	SS18-SSX2_GFP	6	862280000	2.16618	0.000436019	-3.48244	-2.07494	APOA1	2.16618	-3.48244
29.6236	29.5658	29.7293	25.9281	26.1068	26.2659			+	SS18-SSX2_GFP	7	3272200000	5.27571	0	-3.53929	-3.19236	C3	5.27571	-3.53929
32.2483	32.3592	32.2892	28.8623	28.6212	28.7756			+	SS18-SSX2_GFP	11	21408000000	5.863	0	-3.54582	-3.29052	ARL6IP4	5.863	-3.54582
28.9379	28.7759	28.7207	25.4283	25.0284	25.2753			+	SS18-SSX2_GFP	7	1866300000	4.93353	0	-3.5675	-3.14735	NSA2	4.93353	-3.5675
28.609	29.0493	28.8322	25.1036	25.01	25.562			+	SS18-SSX2_GFP	5	2021000000	4.14832	0	-3.60492	-2.97262	H1FX	4.14832	-3.60492
28.6213	28.891	29.0179	25.4748	24.9207	25.2856			+	SS18-SSX2_GFP	7	1942300000	4.25699	0	-3.61635	-3.01286	SREK1IP1	4.25699	-3.61635
30.2733	30.3984	29.846	26.3816	26.7982	26.4292			+	SS18-SSX2_GFP	17	5085300000	4.16224	0	-3.63623	-2.99816	TRIM21	4.16224	-3.63623
30.6942	30.8065	30.8619	27.2697	27.029	26.9822			+	SS18-SSX2_GFP	28	6382400000	5.46261	0	-3.69389	-3.35253	BCAR1	5.46261	-3.69389
27.8551	27.8199	27.915	24.5709	24.0393	23.8622			+	SS18-SSX2_GFP	10	1039100000	4.17949	0	-3.70588	-3.05079	TAF2	4.17949	-3.70588
31.9947	32.0723	32.0199	28.4132	28.1719	28.3177			+	SS18-SSX2_GFP	7	15431000000	6.03725	0	-3.72802	-3.47188	SNRNP27	6.03725	-3.72802
26.2199	28.9241	26.0146	21.4981	23.9799	24.4703			+	SS18-SSX2_GFP	3	861880000	1.3313	0.000288401	-3.73677	-1.61522	BPTF	1.3313	-3.73677
30.9763	31.1833	31.1402	27.4937	27.0409	27.3613			+	SS18-SSX2_GFP	12	8517700000	4.85948	0	-3.80128	-3.30988	ZCCHC17	4.85948	-3.80128
32.2594	32.4948	32.2728	28.7234	28.4148	28.4717			+	SS18-SSX2_GFP	12	19809000000	5.20516	0	-3.80571	-3.39276	FAM133B	5.20516	-3.80571
26.4235	26.0367	26.5252	23.2793	21.9194	22.2683			+	SS18-SSX2_GFP	3	325700000	3.04473	0	-3.83948	-2.67728	TF	3.04473	-3.83948
26.9414	26.5016	26.545	22.1923	23.7677	22.374			+	SS18-SSX2_GFP	4	341390000	2.77522	0	-3.8847	-2.56093	C1R	2.77522	-3.8847
27.601	27.7363	27.5356	23.9363	24.0829	22.8675			+	SS18-SSX2_GFP	8	795000000	3.30143	0	-3.99539	-2.87941	PKM	3.30143	-3.99539
25.9666	26.8769	26.1637	22.5655	22.0945	22.2464			+	SS18-SSX2_GFP	3	322240000	3.69942	0	-4.0336	-3.08051	DDX55	3.69942	-4.0336
32.7619	32.7991	32.4436	28.3149	28.6676	28.6675			+	SS18-SSX2_GFP	3	25068000000	4.83735	0	-4.11819	-3.54126	RPL39P5	4.83735	-4.11819
25.733	27.8614	26.8758	24.17	21.2144	22.7025			+	SS18-SSX2_GFP	5	471310000	1.765	0.000412556	-4.12776	-2.01184	ZNF593	1.765	-4.12776
27.6172	27.8161	27.8035	23.5317	23.6558	23.6272			+	SS18-SSX2_GFP	9	874160000	6.20398	0	-4.14069	-3.85383	CLK3	6.20398	-4.14069
35.6399	35.7935	35.6197	30.8553	31.6251	31.9393			+	SS18-SSX2_GFP	17	199880000000	3.68038	0	-4.21116	-3.1743	ARGLU1	3.68038	-4.21116
27.4822	27.2644	27.8779	23.8003	22.7817	23.156			+	SS18-SSX2_GFP	7	665120000	3.60907	0	-4.29548	-3.18788	CIR1	3.60907	-4.29548
27.3719	27.0814	27.4284	22.4835	22.4274	23.0113			+	SS18-SSX2_GFP	7	530510000	4.57085	0	-4.65316	-3.83039	EIF2B1	4.57085	-4.65316
28.4121	27.6419	26.8185	22.3823	23.2004	23.1354			+	SS18-SSX2_GFP	5	712600000	3.05627	0	-4.71812	-3.08423	CENPV	3.05627	-4.71812
27.2679	28.6569	28.7139	23.5847	23.0341	23.7499			+	SS18-SSX2_GFP	6	1051500000	3.10109	0	-4.75666	-3.12952	FN1	3.10109	-4.75666
33.1233	33.2768	33.2249	28.3851	28.4342	28.3909			+	SS18-SSX2_GFP	34	30957000000	7.23621	0	-4.80494	-4.58635	KRT1	7.23621	-4.80494
28.779	28.6547	28.6926	22.9905	24.1871	24.3756			+	SS18-SSX2_GFP	2	1467200000	3.43545	0	-4.8577	-3.38453	RPL22L1	3.43545	-4.8577
27.778	27.6739	25.8253	22.2082	21.6612	22.3014			+	SS18-SSX2_GFP	5	532810000	2.78768	0	-5.03546	-3.02436	FCF1	2.78768	-5.03546
31.5508	31.5728	31.6864	26.6262	26.3013	26.341			+	SS18-SSX2_GFP	29	10114000000	5.90568	0	-5.1805	-4.66461	KRT2	5.90568	-5.1805
28.3597	28.5302	28.4877	23.4329	22.9859	23.0907			+	SS18-SSX2_GFP	4	1278400000	5.47968	0	-5.28939	-4.62209	SSSCA1	5.47968	-5.28939
27.4759	27.4569	27.3827	23.3775	21.5232	21.2114			+	SS18-SSX2_GFP	3	559720000	2.87441	0	-5.40116	-3.22135	ITIH4	2.87441	-5.40116
27.5963	27.1661	27.3253	22.2542	21.4526	21.747			+	SS18-SSX2_GFP	6	536440000	4.50671	0	-5.54464	-4.38086	ITIH2	4.50671	-5.54464
27.2839	28.3327	28.4312	22.5074	21.1434	23.6575			+	SS18-SSX2_GFP	5	971140000	2.62487	0	-5.57983	-3.07581	C4A	2.62487	-5.57983
27.7565	28.8818	28.7675	22.5984	22.4669	22.3368			+	SS18-SSX2_GFP	13	1224900000	4.09417	0	-6.00119	-4.39504	KRT14	4.09417	-6.00119
33.1998	33.158	33.1492	26.9299	27.1055	26.9822			+	SS18-SSX2_GFP	8	27843000000	7.4405	0	-6.16317	-5.84547	SUB1	7.4405	-6.16317
28.4795	28.6728	29.0288	21.5416	22.7306	23.1592			+	SS18-SSX2_GFP	4	1247200000	3.59445	0	-6.24995	-4.13932	PLG	3.59445	-6.24995
31.4121	31.5738	31.6268	25.6724	24.5261	25.3291			+	SS18-SSX2_GFP	23	9109500000	4.2896	0	-6.36165	-4.72722	KRT9	4.2896	-6.36165
31.0125	30.9584	30.9843	25.3355	24.2216	24.1546			+	SS18-SSX2_GFP	2	6448200000	4.12682	0	-6.41447	-4.63724	C1QA	4.12682	-6.41447
28.7755	28.4175	28.7029	21.7136	21.6005	22.8039			+	SS18-SSX2_GFP	21	1156400000	4.10502	0	-6.5926	-4.7126	KRT5	4.10502	-6.5926
29.9488	30.0125	30.1137	22.7897	23.495	23.7301			+	SS18-SSX2_GFP	19	3227400000	4.69885	0	-6.68674	-5.19718	BRD2	4.69885	-6.68674
32.8417	32.8254	32.7259	25.2538	25.1021	25.2172			+	SS18-SSX2_GFP	29	20097000000	7.68442	0	-7.60664	-7.18767	KRT10	7.68442	-7.60664
31.4585	31.0454	30.9174	22.7683	23.8232	22.2465			+	SS18-SSX2_GFP	2	6774500000	4.11973	0	-8.19443	-5.49361	IGKV2D-29	4.11973	-8.19443
