# Supplementary material for: Targeted degradation of BRD9 reverses oncogenic gene expression in synovial sarcoma
Source: eLife. 2018 Nov 15;7:e41305. doi: 10.7554/eLife.41305 (PMC6277197; doi:10.7554/eLife.41305)
Supplement: Figure 2—figure supplement 1—source data 3. [file elife-41305-fig2-figsupp1-data3.xlsx]

## Sheet: Figure2-figure supplement 1-sd3
	SS18-SSX1 purifications					SS18-SSX2 purifications
Protein	SS18-SSX1.1	SS18-SSX1.2	SS18-SSX1.3	Av. Peptides	St Dev	SS18-SSX2.1	SS18-SSX2.2	SS18-SSX2.3	Av. Peptides	St Dev
SMARCA4	60	62	55	59	3.60555	56	59	61	58.6667	2.51661
ARID1A	54	56	48	52.6667	4.16333	51	55	55	53.6667	2.3094
SMARCC1	55	56	36	49	11.2694	39	52	52	47.6667	7.50555
SMARCA2	51	48	41	46.6667	5.1316	42	50	51	47.6667	4.93288
SMARCC2	48	51	31	43.3333	10.7858	35	47	47	43	6.9282
ARID1B	44	39	37	40	3.60555	39	43	44	42	2.64575
ACTB	32	33	30	31.6667	1.52753	31	32	33	32	1
SMARCD1	31	31	25	29	3.4641	26	30	29	28.3333	2.08167
SMARCA5	25	26	23	24.6667	1.52753	27	26	25	26	1
SMARCD2	27	27	18	24	5.19615	21	25	25	23.6667	2.3094
DPF2	22	22	19	21	1.73205	19	22	21	20.6667	1.52753
SMARCD3	19	20	19	19.3333	0.57735	21	21	21	21	0
ACTL6A	19	20	16	18.3333	2.08167	16	18	18	17.3333	1.1547
SMARCB1	18	19	16	17.6667	1.52753	18	19	20	19	1
SMARCA1	17	17	18	17.3333	0.57735	18	18	17	17.6667	0.57735
SMARCB1	18	18	16	17.3333	1.1547	18	19	19	18.6667	0.57735
SMARCE1	20	19	13	17.3333	3.78594	17	19	20	18.6667	1.52753
BRD9	13	13	11	12.3333	1.1547	11	12	13	12	1
PBRM	9	14	12	11.6667	2.51661	13	15	15	14.3333	1.1547
SS18-SSX	5	5	3	4.33333	1.1547	6	6	6	6	0
DPF1	5	5	3	4.33333	1.1547	3	5	5	4.33333	1.1547
PHF10	4	4	4	4	0	4	2	2	2.66667	1.1547
DPF3	3	4	3	3.33333	0.57735	4	3	3	3.33333	0.57735
BCL7B	3	3	3	3	0	3	3	3	3	0
ARID2	3	2	3	2.66667	0.57735	3	2	1	2	1
BCL7A	2	3	2	2.33333	0.57735	2	2	2	2	0
BCL7C	2	2	2	2	0	2	2	2	2	0
BRD7	2	1	1	1.33333	0.57735	1	2	2	1.66667	0.57735
*	Numbers represent the number of identified peptides for each protein in each of 3 independent SS18-SSX1 or SS18-SSX2 purifications
