# Supplementary material for: Targeted degradation of BRD9 reverses oncogenic gene expression in synovial sarcoma
Source: eLife. 2018 Nov 15;7:e41305. doi: 10.7554/eLife.41305 (PMC6277197; doi:10.7554/eLife.41305)
Supplement: Figure 2—figure supplement 1—source data 4. [file elife-41305-fig2-figsupp1-data4.xlsx]

## Sheet: Figure 2-source data 3
	SS18-SSX1 purifications					SS18-SSX2 purifications
Protein	SS18-SSX1.1	SS18-SSX1.2	SS18-SSX1.3	Av. Peptides	St Dev	SS18-SSX2.1	SS18-SSX2.2	SS18-SSX2.3	Av. Peptides	St Dev
SMARCA4	40	38	39	39	1	36	36	36	36	0
SMARCC2	29	24	28	27	2.64575	12	11	11	11.3333	0.57735
SMARCA2	27	26	27	26.6667	0.57735	16	17	17	16.6667	0.57735
SMARCC1	25	25	27	25.6667	1.1547	14	13	15	14	1
ARID1A	16	17	17	16.6667	0.57735	7	7	7	7	0
SMARCD1	12	12	12	12	0	8	9	8	8.33333	0.57735
SMARCD2	12	10	12	11.3333	1.1547	0	0	0	0	0
SMARCE1	11	11	11	11	0	5	4	6	5	1
SMARCD3	10	10	9	9.66667	0.57735	3	3	2	2.66667	0.57735
ACTL6A	9	7	9	8.33333	1.1547	5	4	4	4.33333	0.57735
ARID2	7	9	9	8.33333	1.1547	0	0	0	0	0
SS18-SSX	9	8	8	8.33333	0.57735	5	5	5	5	0
ARID1B	7	6	6	6.33333	0.57735	0	0	0	0	0
SMARCB1	5	5	6	5.33333	0.57735	3	2	2	2.33333	0.57735
SMARCA5	5	5	4	4.66667	0.57735	26	24	24	24.6667	1.1547
DPF2	4	3	5	4	1	5	4	5	4.66667	0.57735
BRD9	2	2	2	2	0	4	3	3	3.33333	0.57735
BCL7B	1	1	1	1	0	1	1	1	1	0
BRD7	1	1	1	1	0	1	1	1	1	0
BCL7C	1	0	1	0.666667	0.57735	0	0	0	0	0
*	Numbers represent the number of identified peptides for each protein in each of 3 independent SS18-SSX1 or SS18-SSX2 purifications
