# Supplementary material for: Targeted degradation of BRD9 reverses oncogenic gene expression in synovial sarcoma
Source: eLife. 2018 Nov 15;7:e41305. doi: 10.7554/eLife.41305 (PMC6277197; doi:10.7554/eLife.41305)
Supplement: Figure 2—source data 1. [file elife-41305-fig2-data1.xlsx]

## Sheet: Figure 2-source data 1
iBAQ IgG_1	iBAQ IgG_2	iBAQ IgG_3	iBAQ SSX1_1	iBAQ SSX1_2	iBAQ SSX1_3	Only identified by site	Reverse	Student's T-test Significant SSX1_IgG	Student's T-test significant	Peptides	Intensity	-Log Student's T-test p-value SSX1_IgG	Student's T-test q-value SSX1_IgG	Student's T-test Difference SSX1_IgG	Student's T-test Test statistic SSX1_IgG	Figure
13.9466	14.8596	15.3312	24.5033	24.1105	25.1092			+	SSX1_IgG	10	1561700000	4.41074	0	9.86189	6.57653	ACTL6A
18.3699	18.3319	17.6704	19.8316	19.8943	20.3612			+	SSX1_IgG	9	227240000	2.60164	0.00275556	1.90496	1.48599	ADAR
15.2467	14.3478	17.773	18.7166	18.0326	18.5682			+	SSX1_IgG	3	85020000	1.19077	0.0085509	2.64999	1.29512	ADNP
18.8824	19.0981	19.9185	16.4757	16.9282	18.1534			+	SSX1_IgG	4	50856000	1.63098	0.00683951	-2.1139	-1.32763	AKR1B15
18.5268	18.3675	19.0952	16.2055	15.2896	17.631			+	SSX1_IgG	1	28099000	1.48054	0.00688199	-2.28777	-1.33309	AKR1D1
20.0927	19.5222	19.9488	16.3634	18.8378	18.2615			+	SSX1_IgG	3	69653000	1.24512	0.0170481	-2.03368	-1.151	ALDH3A1
19.9263	20.036	19.2647	22.039	20.8472	22.1213			+	SSX1_IgG	2	174970000	1.80661	0.0067561	1.92683	1.30457	ALYREF
19.3538	18.7415	19.4016	17.0766	18.5307	17.6551			+	SSX1_IgG	2	40387000	1.39152	0.0429108	-1.41148	-0.958178	AMBP
18.8996	18.1243	15.2759	21.0595	19.1671	20.5243			+	SSX1_IgG	1	15171000	1.07016	0.010093	2.81703	1.25915	ANAPC7
19.0091	18.7475	18.9583	16.9651	16.8765	16.8037			+	SSX1_IgG	2	32525000	4.58401	0	-2.02324	-1.85161	ANXA4
20.8474	20.6475	21.1747	19.382	19.9086	18.9223			+	SSX1_IgG	3	145090000	1.99509	0.0192842	-1.48558	-1.12228	APOA1
20.0219	19.8455	20.2982	15.4211	18.3822	19.1883			+	SSX1_IgG	4	111250000	0.971807	0.0191832	-2.39133	-1.11079	APOA4
13.6509	14.4359	17.0852	22.2352	21.7037	22.7847			+	SSX1_IgG	17	1101100000	2.56915	0	7.18383	3.44579	ARID1A
14.777	13.9395	14.9961	19.5117	18.8627	20.0597			+	SSX1_IgG	7	127440000	3.31361	0	4.90719	3.33234	ARID1B
15.0939	13.2067	15.5625	19.9133	20.2018	20.9635			+	SSX1_IgG	10	275480000	2.72949	0	5.73852	3.2145	ARID2
20.4661	20.1102	19.4123	22.7067	20.9947	22.7949			+	SSX1_IgG	1	97450000	1.5131	0.00679755	2.16924	1.3047	BCL7B
18.4836	18.0395	16.9117	20.5914	18.9226	20.319			+	SSX1_IgG	2	66306000	1.42374	0.0100347	2.13275	1.25664	BCLAF1
15.8212	15.8787	15.5137	17.5978	17.2191	18.3903			+	SSX1_IgG	1	27502000	2.27381	0.00269565	1.99789	1.46563	BRD4
13.3793	14.7282	15.3014	17.4481	16.5831	18.7293			+	SSX1_IgG	1	23483000	1.67777	0	3.11723	1.68997	BRD7
15.7948	15.9448	14.7382	17.7756	17.1575	17.9026			+	SSX1_IgG	2	15390000	2.05462	0.00271533	2.1193	1.46767	BRD9
18.9887	18.887	19.4563	16.8927	18.3987	16.5941			+	SSX1_IgG	8	178660000	1.44172	0.0169574	-1.81546	-1.14517	C4B
15.5919	16.8275	13.8255	16.7823	18.2642	17.5854			+	SSX1_IgG	1	17478000	1.02988	0.025899	2.12898	1.08032	CAPN2
12.6949	12.7503	11.5714	13.715	14.733	14.1451			+	SSX1_IgG	1	1299500	1.7331	0.00992	1.85885	1.25234	CDC23
14.2367	14.0435	16.5691	17.1123	17.8562	18.6193			+	SSX1_IgG	2	33397000	1.46755	0.00096124	2.91281	1.51645	CDC5L
16.445	15.0927	14.8332	23.5429	22.9844	24.0331			+	SSX1_IgG	22	1247700000	3.79623	0	8.06317	5.08925	CDC73
18.7154	18.3895	19.0161	17.7705	17.5852	15.9888			+	SSX1_IgG	2	31036000	1.25846	0.0339324	-1.59215	-0.998977	CFB
18.4514	18.1002	17.4524	21.9738	21.5005	22.4845			+	SSX1_IgG	26	1225800000	3.21136	0	3.98496	2.83057	CHD4
17.437	18.0879	18.1566	21.2913	19.1274	21.1047			+	SSX1_IgG	2	30711000	1.63677	0.000946565	2.61393	1.51157	CHTOP
19.2143	15.4196	14.4929	22.8614	21.8476	21.0436			+	SSX1_IgG	2	70820000	1.64496	0	5.54196	2.18435	CIRBP
16.7448	18.1354	18.9607	14.8504	16.5256	16.0059			+	SSX1_IgG	2	49133000	1.24144	0.0101087	-2.15297	-1.18663	CP
17.8306	16.8652	16.7749	20.0706	19.9095	19.5817			+	SSX1_IgG	3	66705000	2.73763	0	2.69702	1.97266	CSNK2A1
13.6915	13.7143	14.7429	23.1436	22.6253	23.6108			+	SSX1_IgG	22	1658800000	4.45335	0	9.07696	6.26618	CTR9
16.9104	16.9221	13.6922	17.0775	19.2056	19.3783			+	SSX1_IgG	3	58510000	0.974014	0.0117849	2.71224	1.17683	DDX1
21.6275	21.5948	20.9478	23.612	23.005	24.1753			+	SSX1_IgG	21	1555600000	2.2633	0.000992	2.20738	1.57227	DDX17
20.2791	20.3137	20.2241	23.3956	22.8201	23.6943			+	SSX1_IgG	17	1325200000	3.52325	0	3.03102	2.40964	DDX21
15.8398	15.5723	15.8137	18.5824	18.379	17.7643			+	SSX1_IgG	2	44647000	3.18275	0	2.49997	1.98371	DDX23
23.5874	23.1835	23.0661	24.6806	24.7451	25.2701			+	SSX1_IgG	23	4044400000	2.5697	0.00865455	1.61963	1.30144	DDX5
19.6021	19.6952	19.3778	21.0196	20.921	22.0707			+	SSX1_IgG	12	422850000	2.02579	0.00916667	1.77874	1.28914	DHX15
21.9031	21.9875	21.613	23.3305	23.0597	23.6908			+	SSX1_IgG	33	2691300000	2.68037	0.00997701	1.52578	1.25564	DHX9
18.2223	18.364	18.1383	16.9233	15.9868	16.5011			+	SSX1_IgG	2	26088000	2.50286	0.00485906	-1.7711	-1.3851	DLAT
12.8723	14.8674	14.9687	20.9666	20.9764	21.6309			+	SSX1_IgG	5	161920000	3.19905	0	6.9552	4.05067	DPF2
17.65	18.0853	17.1162	19.782	19.4355	20.183			+	SSX1_IgG	4	174770000	2.45544	0	2.18297	1.61247	EFTUD2
19.091	19.692	18.9677	19.8797	20.7311	21.246			+	SSX1_IgG	4	163540000	1.3966	0.0481481	1.36867	0.939427	EIF4A3
23.0555	22.6545	22.5058	24.302	24.4911	25.2746			+	SSX1_IgG	13	1698100000	2.33998	0.00265714	1.95063	1.45573	ELAVL1
22.1021	21.7148	22.1055	20.7485	20.3212	20.9594			+	SSX1_IgG	4	298640000	2.32626	0.0299899	-1.29775	-1.05666	ENO1
20.8456	20.8031	20.2621	21.9808	21.5071	21.9917			+	SSX1_IgG	6	308960000	2.07096	0.0432523	1.1896	0.954311	FBL
15.9662	16.6135	15.05	18.4898	17.788	19.2994			+	SSX1_IgG	2	54638000	1.86608	0	2.64916	1.62564	GATAD2A
15.8807	15.6961	14.2803	28.6782	28.7481	28.8346			+	SSX1_IgG	9	12233000000	4.92131	0	13.4679	8.93378	SS18-SSX
15.1905	13.3745	15.3931	18.342	18.9157	19.5195			+	SSX1_IgG	4	73093000	2.37977	0	4.27303	2.47532	GLTSCR1
16.1879	15.054	13.3734	20.6349	19.7887	21.6793			+	SSX1_IgG	5	174330000	2.39137	0	5.82922	2.93881	GSPT1
18.0613	14.5939	18.3021	19.6843	20.8519	20.7079			+	SSX1_IgG	2	105940000	1.28319	0.00096875	3.42896	1.5219	HDAC1
14.5742	16.4678	15.0803	18.9647	15.9945	18.8419			+	SSX1_IgG	2	20473000	1.07103	0.0102198	2.55959	1.20549	HDAC2
19.6496	19.3745	19.2265	17.9642	17.8297	18.2753			+	SSX1_IgG	1	58429000	2.81499	0.0111784	-1.3938	-1.18016	HEL-248
20.2336	21.0945	21.007	23.2775	23.0874	23.3689			+	SSX1_IgG	5	461410000	3.00352	0	2.46627	1.91804	HNRNPA0
23.7558	23.6096	22.5863	25.2796	24.9729	25.452			+	SSX1_IgG	13	2292300000	2.08538	0.00569536	1.9176	1.37591	HNRNPA1
24.4494	24.4695	24.2544	26.3863	25.8499	27.0118			+	SSX1_IgG	17	6643400000	2.38653	0.000932331	2.02486	1.50807	HNRNPA3
25.2806	25.1963	25.3461	27.5563	27.64	28.2223			+	SSX1_IgG	16	12623000000	3.53537	0	2.53187	2.08578	HNRNPC
24.2459	24.0603	23.5844	26.2424	25.4739	26.5773			+	SSX1_IgG	11	3865200000	2.30049	0.000984127	2.13433	1.54502	HNRNPD
22.6209	22.2694	20.3912	24.2367	23.6851	24.3609			+	SSX1_IgG	8	1082900000	1.49504	0.00562092	2.33377	1.35479	HNRNPDL
22.1374	22.1834	22.0567	24.245	23.5543	24.908			+	SSX1_IgG	9	1161300000	2.2374	0.000953846	2.10992	1.51514	HNRNPF
24.2504	23.9541	23.966	26.1317	25.3546	26.5782			+	SSX1_IgG	14	4845800000	2.21689	0.00438889	1.96463	1.43364	HNRNPH1
20.7286	19.7539	19.1061	22.7553	21.8067	22.6301			+	SSX1_IgG	6	326810000	1.98084	0	2.53448	1.62723	HNRNPH3
24.4357	24.4089	23.801	25.8116	25.167	26.2671			+	SSX1_IgG	16	5922700000	1.80305	0.0190833	1.53337	1.11072	HNRNPK
23.8926	23.9932	23.4778	25.5648	25.2843	26.2162			+	SSX1_IgG	18	4248200000	2.40512	0.00349296	1.90057	1.4421	HNRNPL
16.2483	15.8175	14.7458	16.9674	17.0319	17.4376			+	SSX1_IgG	2	15007000	1.51491	0.03046	1.54173	1.04857	HNRNPLL
23.3187	23.1014	22.7669	24.8685	24.4733	25.4559			+	SSX1_IgG	36	5947600000	2.33264	0.00427027	1.87027	1.40888	HNRNPM
22.0054	22.1273	21.6471	24.0673	23.6289	24.8583			+	SSX1_IgG	17	2483400000	2.36451	0	2.2582	1.6275	HNRNPR
22.8178	22.4721	22.9498	25.6087	25.0741	25.9224			+	SSX1_IgG	21	6341800000	3.20967	0	2.78852	2.16892	HNRNPU
18.6762	18.06	18.2763	19.4013	19.3541	20.5739			+	SSX1_IgG	3	114060000	1.51806	0.033534	1.43892	1.0007	HNRNPUL1
17.596	18.1696	18.0047	20.9469	20.6765	21.7093			+	SSX1_IgG	7	283750000	3.07873	0	3.18746	2.35566	HNRNPUL2
14.6851	15.4526	15.5871	18.9422	19.1909	20.1958			+	SSX1_IgG	1	32244000	3.0442	0	4.20138	2.84808	HP1BP3
14.2804	15.0509	14.4686	20.6061	20.5528	21.2049			+	SSX1_IgG	4	475490000	4.41752	0	6.18794	4.71562	HRNR
18.7258	19.0752	20.3184	14.7006	18.8067	15.4714			+	SSX1_IgG	1	35776000	1.06099	0.00860241	-3.04691	-1.29681	HSPB1
21.5082	21.1443	21.6567	19.4576	20.3154	15.9673			+	SSX1_IgG	3	74420000	1.00114	0.0103911	-2.8563	-1.2215	HSPE1
18.3324	18.564	18.5489	16.746	17.0393	17.47			+	SSX1_IgG	1	22678000	2.47822	0.017418	-1.39669	-1.14186	IGHA1
25.0857	24.778	24.9106	21.2769	22.0735	23.0767			+	SSX1_IgG	2	1452300000	2.20585	0	-2.78238	-1.8206	IGHG1
24.0062	24.035	23.6144	18.1217	16.1733	16.8803			+	SSX1_IgG	1	234400000	3.50987	0	-6.82674	-4.30598	IGLV4-60
16.8608	17.0161	14.7902	17.773	17.8706	18.8827			+	SSX1_IgG	1	26368000	1.1475	0.0262974	1.95308	1.08479	IK
22.8363	22.9878	22.2812	24.9207	24.8576	25.2704			+	SSX1_IgG	11	2100100000	3.11952	0	2.31444	1.85124	ILF2
22.0185	21.8455	21.2073	24.2802	23.6307	24.734			+	SSX1_IgG	18	2653100000	2.47508	0	2.52451	1.79786	ILF3
18.7611	18.5592	18.6246	16.6416	17.3432	17.6313			+	SSX1_IgG	1	90431000	2.06686	0.0189845	-1.44292	-1.11005	IQGAP1
18.153	19.1097	19.3315	14.9557	17.0028	15.4639			+	SSX1_IgG	4	57120000	1.89227	0	-3.05725	-1.78392	ITIH4
15.5475	14.7203	16.3784	21.6969	21.2641	23.0246			+	SSX1_IgG	5	174430000	3.07929	0	6.44646	3.76129	IWS1
22.0419	22.3279	21.6857	23.7835	24.0112	24.4545			+	SSX1_IgG	3	605640000	2.79889	0	2.06455	1.62462	KHDRBS1
17.9796	18.1449	19.6446	14.7746	18.5824	15.1906			+	SSX1_IgG	2	41994000	0.84889	0.0314851	-2.40715	-1.03887	KNG1
15.241	12.958	15.1821	21.153	19.9635	21.093			+	SSX1_IgG	6	139770000	2.75569	0	6.27613	3.40146	KPRP
24.7235	24.5112	23.9154	27.3624	26.5941	27.7837			+	SSX1_IgG	31	17743000000	2.6008	0	2.86332	2.01075	KRT1
23.6566	23.5781	23.0227	26.4643	25.7947	27.1253			+	SSX1_IgG	23	8618100000	2.66583	0	3.04231	2.12329	KRT10
20.3461	19.9509	19.5699	23.7209	23.0341	24.2121			+	SSX1_IgG	16	1304200000	3.08418	0	3.70004	2.62684	KRT14
15.5894	15.9197	15.1322	20.474	18.5503	20.8092			+	SSX1_IgG	13	109880000	2.39576	0	4.39739	2.52738	KRT16
22.184	21.8873	22.9185	19.9665	21.1853	21.3416			+	SSX1_IgG	13	565960000	1.31944	0.0379713	-1.4988	-0.978415	KRT18
22.3745	22.1625	21.9185	24.5714	24.2466	25.3849			+	SSX1_IgG	26	4109800000	2.68428	0	2.58243	1.8943	KRT2
15.6634	15.4001	17.3905	22.6502	21.1675	22.6389			+	SSX1_IgG	14	484860000	2.7823	0	6.00085	3.343	KRT5
17.3407	18.4671	16.5445	21.6628	20.7548	21.8901			+	SSX1_IgG	15	288010000	2.42878	0	3.98516	2.40537	KRT6B
17.0136	17.2587	17.0223	19.382	19.0202	20.6924			+	SSX1_IgG	15	99951000	2.14259	0	2.60006	1.71704	KRT6C
19.4739	19.4157	19.6098	15.1497	16.0057	14.8263			+	SSX1_IgG	4	63391000	3.51599	0	-4.17255	-3.07593	KRT81
23.683	23.7237	23.0288	26.734	25.96	27.0592			+	SSX1_IgG	19	9167900000	2.84456	0	3.10589	2.2245	KRT9
19.6781	19.632	20.4168	17.7863	17.6653	18.3337			+	SSX1_IgG	3	64862000	2.42582	0.00277612	-1.98049	-1.49246	LDHB
16.8179	16.5691	15.7804	22.8829	22.1977	23.0964			+	SSX1_IgG	8	849510000	3.97404	0	6.33653	4.48168	LEO1
20.2818	20.0228	19.5968	21.8249	21.4685	22.0377			+	SSX1_IgG	5	252990000	2.65186	0.00346853	1.80986	1.43673	LUC7L2
17.9295	15.6219	15.9634	21.6321	21.0747	20.507			+	SSX1_IgG	4	136770000	2.35357	0	4.56632	2.55238	LUC7L3
20.0543	19.9476	20.7968	16.0167	17.8487	18.1436			+	SSX1_IgG	1	90273000	1.82358	0	-2.92993	-1.70654	MAP2K2
22.7226	22.5678	21.9104	24.5164	23.7839	24.9256			+	SSX1_IgG	24	3233300000	2.0698	0.00432877	2.00834	1.41776	MATR3
15.2144	19.3424	15.2269	19.7444	18.1283	19.0133			+	SSX1_IgG	1	33023000	0.749206	0.0397925	2.3674	0.965814	MEMO1
19.0787	19.0175	18.9483	21.5881	20.3317	21.0499			+	SSX1_IgG	2	65868000	2.24414	0.00351773	1.97507	1.446	MRPL12
17.2312	13.6548	15.2969	20.2897	20.2107	21.1845			+	SSX1_IgG	1	29272000	2.05861	0	5.16735	2.48466	MRPS17
14.886	13.9193	13.3917	18.7985	17.9876	18.6835			+	SSX1_IgG	1	13642000	3.02688	0	4.4242	2.93851	MRPS22
15.3677	14.9645	15.8733	18.6493	19.7463	19.984			+	SSX1_IgG	1	20948000	2.94238	0	4.058	2.72726	MRPS23
15.9264	16.2973	16.1137	20.866	18.6159	21.1981			+	SSX1_IgG	6	221960000	2.13438	0	4.11421	2.26292	MTA2
19.6695	13.2468	15.2654	22.3225	20.7154	22.5682			+	SSX1_IgG	1	28039000	1.36781	0	5.80818	1.94693	NCBP2
15.1716	14.6406	13.5384	17.4096	16.0832	17.2949			+	SSX1_IgG	1	14556000	1.7431	0.000939394	2.47904	1.51034	NUMA1
17.8279	17.6909	17.7706	19.7761	20.0152	20.7141			+	SSX1_IgG	4	134710000	2.97149	0	2.40533	1.87303	PABPC1
14.9705	15.0608	16.3536	23.1988	22.3887	23.5676			+	SSX1_IgG	9	775640000	3.74631	0	7.59009	4.84557	PAF1
17.5486	18.0374	18.298	24.4727	24.5947	25.3952			+	SSX1_IgG	12	1590000000	4.33413	0	6.85951	5.03162	PDIA6
16.3934	15.8562	16.6061	19.8098	19.4359	20.4244			+	SSX1_IgG	2	57983000	3.23184	0	3.60481	2.64194	PGAM5
20.3847	19.7313	20.4358	15.5571	15.4901	19.9195			+	SSX1_IgG	1	41845000	1.01112	0.0096568	-3.19507	-1.28684	PGLS
14.0647	14.7017	15.3599	20.0523	19.2791	20.5456			+	SSX1_IgG	8	322150000	3.25024	0	5.25021	3.4427	PHF3
17.7489	17.6682	12.9909	20.2137	18.2175	20.2409			+	SSX1_IgG	1	19131000	0.935784	0.010152	3.42134	1.26272	PLRG1
15.8046	15.6585	14.5976	18.627	17.2698	18.4228			+	SSX1_IgG	2	31085000	2.07668	0	2.75296	1.75523	PNN
22.1804	21.9437	21.6891	25.065	24.5807	25.6572			+	SSX1_IgG	71	12026000000	3.11907	0	3.16324	2.357	POLR2A
20.2205	19.9463	20.1929	24.9515	24.7563	25.5237			+	SSX1_IgG	46	6522300000	4.44489	0	4.95727	3.97796	POLR2B
14.9931	15.0275	15.1434	22.1922	21.8963	22.5636			+	SSX1_IgG	5	208520000	5.45486	0	7.16267	5.97724	POLR2C
15.8191	15.252	14.1393	20.2952	20.0807	20.608			+	SSX1_IgG	1	23963000	3.27994	0	5.25786	3.46689	POLR2D
17.8986	19.3967	19.5193	25.1637	24.2693	25.3388			+	SSX1_IgG	7	1019300000	3.19834	0	5.98571	3.7009	POLR2E
19.3168	18.2822	14.8283	24.3451	23.6644	21.216			+	SSX1_IgG	3	190070000	1.55621	0	5.59939	2.10774	POLR2F
14.9724	15.3441	15.6903	22.4837	21.9204	22.5734			+	SSX1_IgG	1	48227000	4.74888	0	6.99026	5.41435	POLR2G
19.1238	17.3783	18.8797	24.0907	23.1389	24.4292			+	SSX1_IgG	3	458260000	2.90181	0	5.4257	3.2517	POLR2H
17.3109	18.0615	17.2266	24.1653	22.6987	24.3608			+	SSX1_IgG	4	382050000	3.34235	0	6.20863	3.91014	POLR2I
14.6515	14.7235	16.1392	23.7452	23.9312	24.6323			+	SSX1_IgG	4	392450000	4.06083	0	8.93153	5.74537	POLR2J3
21.198	19.9596	19.099	25.3091	23.6377	25.8803			+	SSX1_IgG	2	240750000	2.23048	0	4.85683	2.54596	POLR2K
20.7013	20.7727	20.2868	25.5912	25.8557	26.3691			+	SSX1_IgG	2	608150000	4.39233	0	5.35172	4.2007	POLR2L
14.1417	14.5146	14.382	19.1226	19.4971	18.9876			+	SSX1_IgG	2	23797000	4.87984	0	4.85632	4.08971	PPHLN1
14.7876	14.7307	13.8032	19.4572	18.3113	19.4726			+	SSX1_IgG	3	98278000	3.12588	0	4.63986	3.09385	PPP1R10
14.5488	14.5499	14.8759	19.4585	18.8068	19.5942			+	SSX1_IgG	3	65026000	4.19153	0	4.6283	3.65496	PRPF40A
14.3682	14.9339	16.0294	18.2242	18.4565	17.6669			+	SSX1_IgG	4	53642000	2.28921	0	3.00542	1.95034	PRPF6
17.4421	17.9981	16.8455	20.1871	19.3407	20.5419			+	SSX1_IgG	19	500630000	2.22195	0	2.59467	1.74424	PRPF8
21.0598	20.3177	20.3244	20.1792	14.7846	16.0195			+	SSX1_IgG	1	17979000	1.01615	0.00551282	-3.57286	-1.3481	PTMA
22.3098	22.0922	21.9314	24.9744	24.2729	25.3542			+	SSX1_IgG	11	1756800000	2.92362	0	2.75605	2.0642	RALY
18.4294	18.6413	18.3791	17.2907	17.4894	17.3945			+	SSX1_IgG	1	140890000	3.41984	0.0342115	-1.09173	-0.993633	RB1CC1
17.6404	17.7074	19.3417	21.0047	21.1987	21.6219			+	SSX1_IgG	4	123490000	2.18674	0	3.04527	1.92088	RBBP4
18.4839	18.6013	17.988	20.5066	20.0163	20.7939			+	SSX1_IgG	2	43140000	2.67356	0	2.08123	1.6075	RBFOX2
19.596	18.8506	18.352	21.3942	18.9797	22.1274			+	SSX1_IgG	5	217450000	0.869523	0.0468093	1.9009	0.942314	RBM14
17.527	17.256	14.579	20.0363	18.7149	20.0282			+	SSX1_IgG	3	97177000	1.40867	0.000976378	3.13913	1.54015	RBM25
16.7168	17.8307	17.1304	20.1348	20.3904	21.2882			+	SSX1_IgG	3	83562000	2.67663	0	3.37849	2.28665	RBM4
20.5581	19.9442	19.8263	22.7317	22.4463	22.7386			+	SSX1_IgG	7	579020000	3.29417	0	2.52934	2.02928	RBMX
17.9458	16.1544	14.0397	18.9917	18.0423	17.7917			+	SSX1_IgG	3	36275000	0.874334	0.0332549	2.2286	1.01923	RCC2
18.8452	19.0499	17.1294	20.8377	21.3397	21.146			+	SSX1_IgG	2	72049000	1.93806	0	2.76632	1.70108	RNPS1
16.9141	17.5424	15.1674	23.2549	23.1039	23.9663			+	SSX1_IgG	10	607390000	3.09144	0	6.90041	3.92374	RPRD1A
22.7298	18.882	17.6307	27.3235	26.9928	27.8341			+	SSX1_IgG	15	7677800000	2.09913	0	7.63592	2.99017	RPRD1B
16.6352	16.4896	16.4531	24.1232	23.5901	24.96			+	SSX1_IgG	25	4212300000	4.35605	0	7.6985	5.48891	RPRD2
20.0808	13.7834	19.7652	20.3464	20.8922	21.3496			+	SSX1_IgG	1	31806000	0.652852	0.039981	2.98627	0.973044	RPS16
17.5673	17.7433	17.3023	19.4826	19.5938	19.7252			+	SSX1_IgG	2	47452000	3.83582	0	2.06286	1.79994	RPS4X
19.1995	14.2668	18.6147	19.5894	19.819	20.4141			+	SSX1_IgG	2	28801000	0.752698	0.0336976	2.58051	1.00205	RPS9
14.9532	14.545	14.2435	18.8219	15.4469	17.5632			+	SSX1_IgG	2	17088000	1.25823	0.00544304	2.69678	1.3444	RSL1D1
18.2472	16.9901	14.9257	19.0368	19.2592	19.9942			+	SSX1_IgG	3	63625000	1.25822	0.00547771	2.70907	1.34744	RTCB
20.0025	19.62	19.1154	21.6361	21.3954	22.0408			+	SSX1_IgG	11	420950000	2.57084	0	2.11143	1.60138	SAFB
15.8359	15.7451	14.534	17.5701	17.0452	18.5021			+	SSX1_IgG	7	30137000	1.75713	0.00267626	2.33412	1.46066	SAFB2
14.4514	14.9967	14.1591	18.5678	18.0008	20.8512			+	SSX1_IgG	3	22882000	2.15212	0	4.60422	2.41685	SAP18
14.5513	15.2149	14.4827	16.9656	17.5625	18.8915			+	SSX1_IgG	2	37219000	2.11584	0	3.05688	1.89253	SCAF11
16.9415	16.2854	13.7154	19.6182	18.92	20.078			+	SSX1_IgG	4	81429000	1.69648	0	3.89129	1.90716	SCAF4
16.9606	16.3093	18.0328	14.346	14.9201	16.6314			+	SSX1_IgG	3	15845000	0.993248	0.0401714	-1.80173	-0.97356	SERPIND1
17.3555	17.6308	17.8254	19.7386	18.5399	19.9349			+	SSX1_IgG	8	177390000	1.77117	0.0105085	1.80052	1.23594	SF3B1
17.7263	17.3128	16.0002	19.7385	18.3498	19.7851			+	SSX1_IgG	3	115090000	1.5018	0.00540881	2.27801	1.33861	SF3B2
18.7054	18.897	18.9989	20.7197	20.1064	21.0619			+	SSX1_IgG	8	337180000	2.41766	0.00565789	1.76221	1.36346	SF3B3
18.0068	17.5197	17.0773	19.465	18.2477	19.6095			+	SSX1_IgG	1	38791000	1.43815	0.031204	1.57281	1.04264	SF3B4
14.0087	20.1495	15.2907	21.2132	19.7001	19.7379			+	SSX1_IgG	2	26601000	0.8999	0.0096	3.73405	1.27204	SF3B5
15.4905	15.4365	19.5417	19.8842	20.6627	20.4178			+	SSX1_IgG	1	38333000	1.19279	0.00273529	3.49869	1.47078	SF3B6
20.5873	18.861	19.6852	16.4835	15.7742	17.1589			+	SSX1_IgG	2	46313000	2.14654	0	-3.23899	-1.9762	SHMT1
14.7353	14.4518	14.921	23.6011	23.2349	23.8728			+	SSX1_IgG	28	2242400000	5.57009	0	8.86686	7.21049	SMARCA2
17.0471	16.9528	16.4109	25.6778	25.0282	26.2063			+	SSX1_IgG	40	10106000000	4.62961	0	8.83387	6.33644	SMARCA4
17.3755	16.9825	16.8966	19.7301	18.191	19.3396			+	SSX1_IgG	5	123970000	1.83843	0.00554839	2.00203	1.34828	SMARCA5
14.922	15.0134	14.6319	23.5492	22.7098	23.8703			+	SSX1_IgG	6	585990000	4.70183	0	8.5207	6.24416	SMARCB1
13.6298	13.7071	18.4963	23.8919	23.6624	24.3697			+	SSX1_IgG	27	2494900000	2.23283	0	8.69691	3.31581	SMARCC1
17.0129	16.7133	16.4978	24.5596	23.49	25.0088			+	SSX1_IgG	31	3600700000	4.05354	0	7.61148	5.16169	SMARCC2
14.9338	15.171	15.0759	23.4229	22.551	23.8641			+	SSX1_IgG	14	1047200000	4.51492	0	8.21909	5.90487	SMARCD1
14.993	15.2756	14.3757	23.2918	22.6277	23.5676			+	SSX1_IgG	12	848990000	4.55762	0	8.28093	5.9781	SMARCD2
15.7536	17.274	14.4711	20.9523	20.0002	21.2069			+	SSX1_IgG	10	170440000	2.27181	0	4.88691	2.58643	SMARCD3
16.1828	13.5679	16.0773	24.4734	23.8202	24.9119			+	SSX1_IgG	11	1326400000	3.25214	0	9.12582	4.77401	SMARCE1
17.8204	17.9271	16.6891	20.0708	19.5708	20.616			+	SSX1_IgG	14	480670000	2.19644	0	2.607	1.74034	SNRNP200
18.6865	17.8243	16.6923	20.8023	18.77	20.2997			+	SSX1_IgG	2	69220000	1.24148	0.0103333	2.22293	1.2076	SNRNP40
19.3628	15.3201	14.5362	21.4176	21.0104	21.0976			+	SSX1_IgG	3	78316000	1.4737	0	4.76884	1.90712	SNRPA1
20.5544	20.2975	19.3702	22.8391	22.0664	22.1806			+	SSX1_IgG	1	906990000	2.2116	0	2.28802	1.59688	SNX13
18.6807	19.2247	18.762	21.6158	21.391	22.2605			+	SSX1_IgG	4	87258000	3.11473	0	2.86659	2.18692	SRP14
19.5594	19.3032	15.4012	21.508	22.2491	22.4114			+	SSX1_IgG	3	104750000	1.35033	0	3.9682	1.67164	SRP9
18.4365	16.4261	17.5976	19.5868	19.3814	18.8097			+	SSX1_IgG	2	77131000	1.32213	0.0246598	1.77258	1.08904	SRRM1
17.3684	17.1877	14.9729	21.2988	20.7342	21.4675			+	SSX1_IgG	7	218730000	2.36012	0	4.65719	2.58529	SRRT
20.2882	20.2832	18.7811	22.7418	22.0494	22.6321			+	SSX1_IgG	5	271200000	2.10405	0	2.69026	1.74056	SRSF1
20.446	18.835	20.0896	21.6497	21.7281	22.0991			+	SSX1_IgG	2	128420000	1.7953	0.00558442	2.03544	1.34991	SRSF10
16.1014	14.2763	14.3982	19.8302	17.5927	19.0242			+	SSX1_IgG	1	15599000	1.93848	0	3.89037	2.06889	SRSF11
21.6315	21.6197	18.8244	23.3266	22.2943	24.2602			+	SSX1_IgG	5	256150000	1.11968	0.0105682	2.60182	1.24324	SRSF2
21.3706	22.7629	22.0638	23.8599	23.9767	24.5039			+	SSX1_IgG	5	557900000	1.98881	0.00429932	2.04774	1.4141	SRSF3
21.3	21.2525	21.0715	22.8342	22.2914	23.4345			+	SSX1_IgG	7	468470000	2.08732	0.0104494	1.64541	1.23032	SRSF6
20.2532	17.8076	20.2596	23.1937	22.95	24.0722			+	SSX1_IgG	5	304550000	1.95992	0	3.96521	2.10406	SRSF7
18.9957	16.1881	17.9371	21.2719	19.907	20.1352			+	SSX1_IgG	4	82728000	1.38364	0.00435862	2.73108	1.42167	SRSF9
16.1335	15.9028	15.6445	18.8047	17.8692	18.9994			+	SSX1_IgG	3	71697000	2.67738	0	2.66421	1.93569	SUPT5H
16.1415	16.3682	16.4554	23.8634	23.403	24.2381			+	SSX1_IgG	45	3711000000	5.07557	0	7.51314	5.96769	SUPT6H
19.3789	19.2019	18.673	21.7727	21.2435	22.1398			+	SSX1_IgG	9	346910000	2.84664	0	2.63408	1.9722	SYNCRIP
15.0199	15.1385	15.8161	21.4946	19.1621	21.4315			+	SSX1_IgG	4	95542000	2.57877	0	5.37121	2.97363	TAF15
17.0893	15.0207	16.397	18.8155	17.6648	18.9838			+	SSX1_IgG	1	21199000	1.46273	0.006925	2.31902	1.336	THOC6
18.5004	18.6883	18.2961	19.7468	19.3719	20.4538			+	SSX1_IgG	6	172600000	1.80886	0.0334187	1.36262	1.01932	THRAP3
20.6144	19.9472	21.0213	17.2424	19.8974	17.7844			+	SSX1_IgG	5	152550000	1.20139	0.0101639	-2.21961	-1.18801	TKT
17.8577	17.9104	17.5549	20.9043	20.8453	21.388			+	SSX1_IgG	3	43602000	4.04936	0	3.27154	2.71611	TRA2A
20.575	19.575	19.3468	22.4813	22.1623	23.2293			+	SSX1_IgG	3	140350000	2.3221	0	2.79202	1.87113	TRA2B
21.3552	21.46	20.7861	23.2999	23.2505	23.9323			+	SSX1_IgG	5	480600000	2.78542	0	2.29379	1.75995	U2AF1
22.5179	22.3617	22.5301	23.9146	23.9346	24.3725			+	SSX1_IgG	9	1065300000	3.26561	0.00482667	1.60402	1.38404	U2AF2
20.12	19.7075	19.231	23.1544	21.0737	23.2849			+	SSX1_IgG	2	121870000	1.68252	0	2.8182	1.60038	UBB
17.9998	17.7445	18.6696	16.4881	15.5861	17.2746			+	SSX1_IgG	1	23259000	1.40402	0.0260305	-1.68838	-1.08201	UGDH
20.187	20.4157	20.7336	18.0112	15.7074	20.1544			+	SSX1_IgG	2	80739000	0.896719	0.0261633	-2.48777	-1.08458	VDAC2
15.2906	17.3185	15.2803	22.6679	22.0215	22.8527			+	SSX1_IgG	5	261220000	3.08491	0	6.55091	3.80198	WDR61
13.7685	15.2832	13.9236	21.5706	21.1123	22.2344			+	SSX1_IgG	7	176550000	3.63974	0	7.31401	4.62612	WDR82
16.332	15.0204	16.6751	20.2138	16.7257	18.8095			+	SSX1_IgG	2	22047000	1.06887	0.0102762	2.57385	1.20737	XP32
17.668	17.8835	18.1987	20.5545	20.4974	21.1061			+	SSX1_IgG	6	229080000	3.45771	0	2.80261	2.24596	XRCC5
15.1524	15.2921	15.2832	21.5125	19.8969	21.4896			+	SSX1_IgG	1	27650000	3.35873	0	5.72374	3.72474	YBX3
17.8579	18.0937	16.3434	20.6706	20.0588	21.1813			+	SSX1_IgG	10	264030000	2.13478	0	3.20522	1.95777	ZFR
19.4875	18.265	19.1059	23.7659	23.1278	24.2956			+	SSX1_IgG	15	1323400000	3.19275	0	4.77696	3.19671	ZNF326
14.5592	15.4467	15.3231	22.0323	21.3905	22.0138			+	SSX1_IgG	5	259280000	4.36529	0	6.70253	4.96999	ZNF768
18.5289	17.8101	18.0186	16.1916	18.1061	17.7744					2	9659600	0.534774	0.426234	-0.761847	-0.467932	A2M
22.1661	21.9962	14.9678	22.4819	22.3341	23.5336					15	643550000	0.568904	0.0566847	3.07318	0.903482	ACTA1
25.6756	25.5328	25.4406	26.8383	26.0982	27.1801					20	9831200000	1.61947	0.0651004	1.15585	0.871332	ACTG1
18.2595	18.6096	18.6274	18.2027	18.4186	18.278					1	25064000	0.666283	0.823471	-0.199071	-0.17532	ACTN1
21.1718	21.0072	21.3614	18.8299	20.4211	20.4525					3	136100000	1.10265	0.0753171	-1.27894	-0.827577	AHSG
18.9744	19.5203	19.3651	16.5168	19.4253	16.3513					1	23817000	0.85243	0.0515023	-1.85548	-0.922505	AKR1A1
19.799	19.8087	20.1159	18.6218	17.7536	19.7412					3	80416000	0.963046	0.111813	-1.20233	-0.758738	AKR1B1
22.6556	22.6679	22.9621	20.9535	22.3733	22.0421					9	664490000	1.03679	0.165456	-0.972205	-0.674955	AKR1B10
20.9569	20.9081	20.9215	20.1436	20.7344	20.4276					6	195740000	1.34807	0.492857	-0.493645	-0.421482	AKR1C1
23.348	22.6898	23.4736	21.3243	22.1314	22.3973					7	669360000	1.40671	0.0653565	-1.21948	-0.868619	AKR1C2
19.8243	19.8196	20.5678	19.1221	19.3714	19.1647					1	131110000	1.51168	0.165609	-0.851175	-0.675385	AKT1
24.0438	23.6855	24.0755	23.001	23.386	23.6872					17	2927800000	1.15597	0.425533	-0.576846	-0.467209	ALB
22.6862	22.6894	22.8555	21.1495	21.8812	21.8451					10	745400000	1.98987	0.0564267	-1.11846	-0.898673	ALDH1A1
20.1976	20.4509	21.0062	17.284	19.3849	20.1257					5	154800000	0.85149	0.0680513	-1.62005	-0.859935	ALDOA
23.487	23.3123	23.0225	23.0003	21.865	23.343					6	1017300000	0.503932	0.57034	-0.537825	-0.366681	AMZ2
20.2468	20.6375	19.8875	20.5745	19.8157	20.8199					1	57265000	0.146068	0.890983	0.146116	0.106512	ANAPC10
20.22	20.1889	20.6247	18.449	19.8137	19.1488					4	117880000	1.34957	0.0707113	-1.20737	-0.851306	ANXA1
23.847	23.7028	23.5708	23.2121	22.7252	24.051					10	1279000000	0.404758	0.688376	-0.377446	-0.270506	ANXA2
20.4155	20.5075	21.1979	16.3197	20.0802	19.6361					2	108270000	0.77085	0.0531507	-2.02833	-0.917031	ANXA5
19.1265	18.4096	19.3319	18.5726	18.4184	18.6375					2	27285000	0.650847	0.627329	-0.413145	-0.321009	APCS
15.546	15.0952	16.5665	15.6281	16.0958	13.6567					3	65976000	0.283865	0.620933	-0.609031	-0.326579	APOB
23.7289	22.8838	22.8754	23.2458	21.7757	23.7364					5	625330000	0.13759	0.850825	-0.243406	-0.147201	ARGLU1
19.8012	19.5883	20.1187	19.7072	19.5682	20.3478					5	162630000	0.0458962	0.982391	0.0382875	0.0297896	ATP5A1
13.5744	14.2454	16.4548	15.602	16.4435	17.7283					3	28351000	0.793037	0.0593274	1.83307	0.886658	BAZ1B
18.7162	18.5207	19.1217	16.7077	17.9591	17.9668					1	21947000	1.28163	0.0695294	-1.24166	-0.85377	C1QA
16.3314	17.9271	16.0466	18.1802	18.1688	17.9735					2	38701000	1.06862	0.0714074	1.33914	0.84276	CCAR2
21.2508	21.1983	20.8494	20.9043	20.286	21.5918					2	118730000	0.162785	0.876256	-0.172115	-0.123152	CFL1
16.5726	15.9483	19.4714	14.8001	18.0507	16.4697					3	25568000	0.245332	0.570194	-0.890598	-0.365773	CLU
19.5548	19.8652	18.4123	20.5132	19.495	20.0909					2	59689000	0.641886	0.396653	0.755613	0.49342	CNN2
16.7735	16.4276	15.1748	16.5078	15.2718	16.5938					1	21566000	0.000433149	1	-0.000859578	-0.000521997	CUL5
21.4479	21.361	20.5582	21.2087	20.8034	21.3926					3	126940000	0.0124604	1	0.0125395	0.00941113	DAZAP1
18.1192	18.6024	19.0301	18.3267	18.0336	18.8					2	40888000	0.223087	0.848428	-0.197184	-0.146597	DDX39B
21.8123	21.4104	21.0842	22.4808	21.4713	22.9154					15	989200000	0.829967	0.274127	0.853507	0.577953	DDX3X
16.2796	16.62	16.3897	16.8554	16.2884	17.8779					2	37397000	0.535216	0.533846	0.577476	0.391305	DDX46
16.7607	16.7811	15.9298	17.4817	17.0019	18.3257					1	14862000	1.09463	0.113318	1.11255	0.752799	DDX49
21.2535	21.6188	20.5263	21.4104	20.2113	22.16					2	79591000	0.068421	0.918793	0.127736	0.0773199	DYNLL2
24.6998	24.4419	24.1048	24.4032	24.2061	24.6305					7	2847500000	0.0033911	1	-0.00219282	-0.00181009	EEF1A1P5
18.1667	18.1015	17.5447	17.5719	17.7675	18.0106					2	65192000	0.262263	0.874607	-0.154316	-0.124988	EEF2
22.9783	22.8091	22.5851	21.1386	20.9369	22.8884					4	271880000	0.836716	0.148672	-1.13623	-0.697069	ELOB
24.3176	23.626	23.269	24.0402	23.1661	24.407					2	371490000	0.0999091	0.909995	0.133583	0.090271	ELOC
17.3519	17.1639	17.2089	16.1537	16.9957	16.8231					2	59671000	1.04328	0.435934	-0.584054	-0.462444	ERBIN
22.8988	22.4259	22.5588	23.4737	23.2787	24.0682					3	295240000	1.622	0.107294	0.97901	0.767209	ERH
17.2856	16.5954	14.1878	16.7577	15.9401	17.6711					1	31417000	0.291659	0.565054	0.766765	0.371538	ESYT1
17.7966	17.6785	17.7515	17.4664	18.1491	17.6369					1	44013000	0.0136384	1	0.00857671	0.00709996	FGA
20.7183	21.339	21.226	20.4329	19.5997	20.7589					4	140600000	0.987303	0.248	-0.830596	-0.595659	FHL3
16.3306	16.985	16.9549	15.5597	15.74	17.0354					4	77256000	0.559645	0.489121	-0.64517	-0.426872	FLNA
14.5451	15.6562	16.2657	15.3983	14.8463	14.9856					2	18812000	0.318455	0.687308	-0.412207	-0.269375	FN1
20.9976	21.0911	20.8259	20.8651	20.5864	21.4681					5	402300000	0.00200343	1	0.00166639	0.00131052	FUBP3
25.7151	25.6601	25.3157	26.1177	25.771	26.4711					6	4848500000	1.10098	0.454535	0.556333	0.449524	FUS
17.4535	18.6522	17.7492	16.4169	16.772	16.9794					3	39914000	1.44179	0.0624846	-1.22892	-0.880189	G6PD
22.7368	22.6828	22.7343	21.2583	21.8822	22.2085					6	542640000	1.54309	0.127816	-0.934926	-0.730815	GAPDH
21.2088	20.4047	21.19	19.4445	20.8655	20.8791					5	215140000	0.4212	0.596523	-0.538138	-0.348367	GC
15.1936	15.2104	15.3085	15.0117	14.6524	15.5194					1	26163000	0.279234	0.853916	-0.176349	-0.140628	GPR179
17.6322	18.732	18.2376	18.383	17.3399	18.9008					4	91405000	0.00426805	1	0.00728162	0.00467244	GTF2I
21.2961	20.4252	20.3105	20.417	21.7118	21.1779					2	87434000	0.363673	0.67131	0.42496	0.285626	HBB
22.0164	21.4953	21.4458	22.8015	21.5513	23.1569					5	268120000	0.751616	0.302774	0.850733	0.559697	HIST1H1C
26.1312	26.1297	26.2287	26.6592	26.133	27.1494					4	2769900000	0.75316	0.563592	0.484009	0.373668	HIST1H2AJ
23.9253	24.0929	24.1173	24.9233	24.6679	25.4367					6	1091400000	1.83542	0.101123	0.964139	0.781317	HIST1H2BM
26.5548	26.4774	26.5223	27.5901	27.1668	27.9437					8	5395600000	2.01394	0.069384	1.04872	0.855622	HIST1H4A
25.214	25.2752	25.6321	25.1395	25.6583	26.6757					4	2300500000	0.407209	0.643227	0.450728	0.30669	HIST2H3PS2
19.8805	20.1987	19.8656	19.7431	18.9444	19.985					1	77612000	0.566541	0.628412	-0.424114	-0.318256	HMOX1
24.7983	24.705	24.483	25.8671	25.4086	25.9877					16	5045100000	2.2652	0.0550364	1.0924	0.910587	HNRNPA2B1
17.5077	17.1379	17.382	17.6256	15.2527	15.9292					1	9147100	0.683532	0.213036	-1.07334	-0.626189	HNRNPAB
20.3244	20.4572	20.5506	21.5113	20.756	22.2597					10	239190000	1.14077	0.121946	1.06491	0.740029	HNRNPH2
21.9653	21.42	22.2828	19.7128	21.6711	21.3835					3	435560000	0.663446	0.268028	-0.966874	-0.582299	HPX
20.2352	20.1824	20.732	20.45	20.6981	21.236					8	322380000	0.638822	0.629775	0.411537	0.318865	HSP90AB1
21.4232	21.1398	20.72	22.2595	21.5891	22.2614					15	641690000	1.44527	0.132061	0.942321	0.723198	HSPA1B
20.1867	20.0851	20.2547	19.6595	18.9391	20.6029					6	194400000	0.383648	0.655772	-0.441623	-0.297538	HSPA5
20.4415	20.133	20.2696	20.3653	19.8784	21.2277					7	318500000	0.198982	0.850221	0.209112	0.148889	HSPA6
22.9377	22.8801	22.7345	23.47	23.0502	23.8799					18	1871200000	1.17224	0.397242	0.615895	0.493886	HSPA8
20.6802	20.4695	19.7417	20.7527	19.3949	20.6111					8	306530000	0.0288035	0.98031	-0.0442422	-0.0291779	HSPA9
19.5193	20.4514	20.0087	19.7417	19.2121	20.1279					6	187840000	0.325186	0.768628	-0.299222	-0.217134	HSPD1
16.7149	16.8104	15.8053	18.9524	16.5175	18.1273					2	25678000	0.842698	0.0932	1.42223	0.797463	IGF2BP1
18.1367	17.6939	19.0988	15.5621	17.6146	17.839					2	72624000	0.714137	0.137474	-1.30456	-0.711026	ITIH2
16.5223	18.0389	17.8978	18.4079	19.062	18.8528					1	16938000	1.16295	0.0714357	1.28792	0.846892	KCNK1
19.716	19.4756	19.2295	19.6907	20.0303	20.858					7	204770000	0.896785	0.350331	0.719277	0.523479	KHSRP
18.0376	18.2719	17.9252	16.5597	17.1532	17.8525					5	38092000	1.07996	0.203217	-0.889772	-0.641365	KRT7
22.5283	22.6262	23.1602	20.8095	21.6704	22.1344					18	918600000	1.3272	0.0679661	-1.23346	-0.859559	KRT8
21.3827	21.9124	20.8535	21.3194	20.2878	21.4755					3	153890000	0.299384	0.733586	-0.355293	-0.239748	LANCL1
21.5781	21.4423	21.9476	18.8788	20.4093	21.1301					3	255500000	1.04665	0.0561786	-1.51654	-0.902335	LDHA
20.286	20.0756	19.7525	19.1337	18.9064	19.9251					2	47959000	0.971219	0.336512	-0.716283	-0.532351	LGALS1
24.0682	23.8775	23.5636	23.5674	23.213	24.1732					33	3545300000	0.229222	0.856315	-0.185232	-0.140691	LMNA
22.0694	22.0161	21.879	21.4955	21.3737	21.8304					16	766570000	1.33427	0.569262	-0.42163	-0.367321	LMNB1
20.8022	21.0092	20.7131	20.0362	20.2523	21.4267					14	399640000	0.24131	0.810548	-0.269725	-0.1872	LMNB2
15.7841	15.6854	15.3459	13.9638	15.1709	15.6506					1	50620000	0.58119	0.458592	-0.676694	-0.445469	LRP1
15.5816	15.4172	15.1687	16.351	14.6835	16.4576					2	29657000	0.306608	0.677692	0.441568	0.278274	LRPPRC
21.4338	21.2128	21.3982	20.2236	20.9538	21.0048					2	254350000	1.11683	0.398278	-0.620888	-0.492206	MAP2K1
18.3778	17.7543	18.9748	15.7698	18.1666	18.5303					1	22747000	0.398117	0.447139	-0.880025	-0.454821	MDH2
21.5394	21.6891	21.2136	20.0922	21.4958	20.8181					1	73922000	0.724211	0.420215	-0.678659	-0.474965	MIF
20.8248	20.49	20.2504	15.5831	19.6509	21.0777					3	76137000	0.4565	0.17819	-1.75117	-0.659699	MYL6
17.6161	17.7638	18.2819	17.9076	15.9493	16.805					1	45271000	0.764835	0.214638	-0.999974	-0.624327	NCKAP1
17.913	18.1372	16.8532	18.7398	17.4576	19.048					2	38079000	0.550565	0.413091	0.780673	0.479638	NCOA5
22.4793	22.5219	22.791	23.0103	22.2939	23.0541					4	289990000	0.28755	0.852318	0.188715	0.149178	NME1
20.5197	19.6928	20.3085	21.2726	20.7323	21.8082					7	231940000	1.29409	0.100287	1.09738	0.785259	NONO
21.7278	22.0343	22.0199	22.4427	21.7584	22.9796					4	324940000	0.563736	0.605627	0.466215	0.340997	NPM1
18.2461	16.9833	17.4986	17.9393	17.8787	18.9038					2	28952000	0.601701	0.458492	0.664632	0.44468	P4HB
21.6792	21.5258	21.529	21.8183	21.6814	21.4522					5	328670000	0.242448	0.926588	0.0726185	0.0649421	PCBP1
20.954	21.5914	20.8657	21.4142	19.6327	21.9497					3	177120000	0.0653558	0.920426	-0.138242	-0.0795996	PCMT1
21.3586	19.9499	20.3026	19.3313	20.3659	20.219					3	123400000	0.457781	0.568253	-0.564973	-0.368661	PCMTD1
19.5944	20.1806	19.7248	19.9347	19.7215	19.3992					3	86472000	0.248263	0.877141	-0.148141	-0.119834	PCMTD2
21.3806	20.8698	21.5778	19.9929	21.5445	21.5607					2	104810000	0.163136	0.842815	-0.243368	-0.155894	PFN1
20.2092	19.733	18.3715	21.4562	19.8523	21.756					3	78305000	0.915477	0.0642982	1.58358	0.875999	PHF5A
21.1353	21.0652	21.658	19.2093	20.3196	20.553					2	315280000	1.29741	0.0669091	-1.25888	-0.865362	PIK3R2
21.083	20.5002	20.9555	19.8292	20.0555	19.6949					8	292670000	2.06061	0.0794494	-0.986365	-0.817999	PKM
22.626	22.0838	22.4554	21.4329	21.5025	22.428					3	281150000	0.771732	0.462105	-0.600588	-0.442111	PPIA
18.6065	18.0061	18.6197	19.6117	18.8984	20.6148					1	27724000	1.13545	0.0717025	1.29749	0.84395	PPP1CB
24.2107	24.4454	24.3669	24.1611	24.1234	24.949					12	1999800000	0.0898421	0.944591	0.0701478	0.054895	PRDX1
19.4635	19.714	19.6534	17.7483	17.6178	19.5949					3	47071000	0.938415	0.0998889	-1.28998	-0.785212	PRDX2
18.8894	18.7058	17.583	18.9772	19.4545	20.3257					21	804800000	0.984734	0.110453	1.19309	0.760917	PRKDC
18.9342	19.5599	19.2782	20.5148	19.8958	21.5768					4	142720000	1.26051	0.0512661	1.40506	0.922489	PRPF19
18.2901	18.0081	18.9319	14.4046	18.9352	19.509					2	65286000	0.184961	0.654289	-0.793733	-0.30096	PSIP1
22.7618	22.9688	22.1303	23.2577	23.0074	24.0035					6	1048600000	0.960388	0.275172	0.80255	0.576846	PTBP1
19.6443	19.9366	18.8364	21.1755	19.708	21.4528					2	125800000	0.965796	0.0930281	1.30635	0.799721	PUF60
19.7508	19.7621	19.6982	19.3941	19.0989	20.7871					1	39774000	0.0146143	0.996939	0.0229931	0.0151178	QKI
16.4544	14.8514	14.6252	16.1565	16.2563	16.9503					1	16981000	0.84661	0.144914	1.14404	0.702935	RBM12B
21.5219	21.5929	20.7125	21.6877	21.6648	22.9935					5	458920000	0.737309	0.310861	0.839574	0.551589	RBM39
19.7122	20.2449	19.0472	20.4107	20.0617	20.9583					4	121870000	0.867563	0.295692	0.808776	0.564109	RCC1
18.2273	18.6818	17.6947	18.1205	16.5928	18.5246					3	42511000	0.280246	0.682796	-0.455296	-0.27531	RNMT
17.6344	17.4978	17.4815	18.8566	14.982	19.3033					1	15239000	0.0437701	0.920715	0.176099	0.0742124	RPS11
19.3311	19.0261	19.3908	18.8947	18.1532	19.3396					1	23262000	0.551531	0.615272	-0.453457	-0.332444	RPS15A
20.2725	19.8598	20.2992	20.2837	20.6681	21.0348					2	77395000	0.934505	0.503394	0.518368	0.411619	RPS18
19.2402	19.0596	19.2581	19.5814	18.4551	20.2427					2	58481000	0.173185	0.844183	0.240428	0.157588	RPS2
19.2946	19.3932	19.5389	20.6022	19.7702	20.6954					2	31386000	1.45381	0.129034	0.947059	0.727088	RPS25
20.3495	20.0009	20.0988	19.9128	20.4916	21.2305					1	50580000	0.427344	0.673246	0.395255	0.283301	RPSA
19.2543	18.6538	19.3732	17.3089	18.5898	18.2688					1	129480000	1.09777	0.133962	-1.03792	-0.718501	RPTOR
20.4296	20.0121	20.8781	18.2837	18.2251	20.3242					2	31676000	0.953645	0.0676034	-1.4956	-0.862491	S100A11
19.6795	19.8056	19.4635	18.5466	16.095	19.7514					4	110620000	0.633457	0.127328	-1.51856	-0.729941	SDHA
22.0038	21.7429	22.0348	20.5386	20.7864	21.2722					3	357520000	1.97446	0.0677617	-1.06146	-0.859833	SERPINA3
17.5685	14.4046	18.19	17.8309	17.4589	19.5968					1	28894000	0.513326	0.170168	1.57451	0.671483	SF1
17.2195	16.2808	13.7875	18.0557	16.6657	18.4235					1	23385000	0.778922	0.0553484	1.95236	0.90575	SF3A3
20.5989	20.7457	20.1361	20.084	20.121	21.0076					6	265760000	0.0900127	0.927438	-0.0893726	-0.0660364	SFPQ
24.0318	23.9213	23.5982	23.6413	22.6014	23.8695					12	1851700000	0.510935	0.60504	-0.47968	-0.339871	SIRT2
21.0837	21.0072	21.0288	21.1059	21.3806	21.6816					5	266770000	0.975868	0.654943	0.349431	0.299225	SLC25A3
24.2085	24.3157	24.0939	24.6201	24.4378	25.6838					9	3051100000	0.833724	0.374123	0.707827	0.507853	SLC25A5
19.927	19.864	19.5948	20.1859	15.3236	20.7377					7	113680000	0.23918	0.544537	-1.0462	-0.38419	SLC25A6
22.7555	22.6749	21.8554	23.8745	23.124	24.1195					14	1025400000	1.43118	0.0564305	1.27738	0.902623	SNRNP70
20.9925	21.2401	19.83	22.1391	21.0861	22.6519					2	189310000	0.938622	0.10126	1.27153	0.778399	SNRPA
22.4512	22.1443	21.7717	22.1925	21.676	22.5558					2	169560000	0.0196439	0.995777	0.0190074	0.0143765	SNRPC
24.1825	24.3148	23.5463	25.3312	24.6743	25.4469					3	667520000	1.54949	0.07085	1.13627	0.849333	SNRPD1
22.8854	23.3329	22.1725	23.8006	23.6137	24.6521					3	537960000	1.23713	0.0729836	1.22515	0.836234	SNRPD2
23.2999	23.2661	23.1007	23.9571	23.7199	24.7088					2	608550000	1.38913	0.149457	0.906374	0.694882	SNRPD3
21.1778	21.2712	20.849	21.6758	20.5849	22.6398					1	72999000	0.367846	0.613378	0.53416	0.332352	SNRPF
23.9469	23.7935	23.9358	22.9447	22.7322	25.5479					3	332560000	0.0573868	0.91842	-0.150479	-0.0789262	SNRPG
22.4988	22.8393	22.0341	23.3961	23.2068	24.0305					4	555820000	1.47656	0.0859032	1.08712	0.810479	SNRPN
19.4185	19.1869	18.7235	20.777	19.2423	20.6938					1	46748000	0.981786	0.127554	1.12806	0.733199	SNU13
14.6616	14.2073	14.2305	13.7946	13.9708	14.5186					2	16609000	0.443372	0.768881	-0.271795	-0.215147	SPTAN1
19.3615	19.4615	19.7727	18.1554	19.0961	18.6873					1	71314000	1.38149	0.159259	-0.885653	-0.681701	STK26
20.8751	21.1888	19.7942	20.8139	20.3195	21.1985					1	53905000	0.116455	0.891317	0.15793	0.105772	SUB1
21.0953	21.185	20.2942	22.6351	20.7375	22.2617					5	211210000	0.722632	0.218229	1.01993	0.619726	TARDBP
22.7775	22.656	22.1418	21.7177	21.7903	22.9429					5	402780000	0.352277	0.703018	-0.374779	-0.259882	TIA1
20.335	19.3578	20.4731	18.8883	20.7505	21.6532					5	143960000	0.158781	0.794728	0.37533	0.19896	TIAL1
13.986	19.7361	18.6237	19.8735	19.6701	19.9461					1	48985000	0.60538	0.0678112	2.38129	0.861917	TMPO
20.9532	20.3382	22.7945	17.7702	22.0345	20.6809					5	286130000	0.340242	0.404486	-1.20009	-0.488139	TPI1
20.9195	21.3232	22.2169	21.6482	22.457	21.1099					3	124740000	0.174144	0.838865	0.251831	0.16269	TPM3
24.3063	23.972	23.8828	22.9899	22.1804	23.483					17	2091900000	1.36237	0.0731918	-1.16929	-0.834621	TRIM21
18.7416	18.0277	18.5899	15.6966	18.3218	18.956					1	11618000	0.319009	0.532566	-0.794958	-0.393337	TSPO
23.0702	23.3298	23.1474	23.4224	22.9108	23.7399					8	1297300000	0.277919	0.852358	0.175255	0.139816	TUBA1B
23.348	23.2138	23.4422	23.4339	23.5182	24.1221					12	1394800000	0.720008	0.663797	0.356769	0.290854	TUBB
20.9341	20.0567	19.4965	20.8902	19.6796	21.5468					11	193610000	0.323889	0.627474	0.5431	0.32164	TUBB4B
23.1299	23.0679	23.078	21.9511	21.7833	23.0015					4	300220000	1.04203	0.227132	-0.846647	-0.612779	TXN
21.7355	21.4102	21.0946	21.1282	20.4461	21.2542					1	29479000	0.686539	0.580313	-0.470592	-0.358721	UCHL1
17.5794	17.3373	17.458	15.9303	16.3661	17.352					2	24367000	0.999949	0.203783	-0.908776	-0.637153	VCP
21.1385	20.4456	21.0845	20.6155	20.817	20.8993					7	363830000	0.179364	0.911407	-0.112272	-0.0906901	VIM
20.3729	20.2841	19.6453	20.7292	20.376	21.2491					4	262340000	0.935706	0.37244	0.683956	0.509741	XRCC6
17.648	17.8406	18.5576	17.0094	16.8806	18.2512					2	59792000	0.542324	0.496272	-0.63501	-0.418532	XRN2
21.4447	21.1779	21.1354	19.2153	20.54	21.0111					2	105990000	0.847919	0.200524	-0.997217	-0.644944	YWHAQ
