# Supplementary material for: Targeted degradation of BRD9 reverses oncogenic gene expression in synovial sarcoma
Source: eLife. 2018 Nov 15;7:e41305. doi: 10.7554/eLife.41305 (PMC6277197; doi:10.7554/eLife.41305)
Supplement: Figure 2—source data 2. [file elife-41305-fig2-data2.xlsx]

## Sheet: Figure 2-source data 2
LFQ intensity IgG_SY01_1	LFQ intensity IgG_SY01_2	LFQ intensity IgG_SY01_3	LFQ intensity SSX2_SY01_1	LFQ intensity SSX2_SY01_2	LFQ intensity SSX2_SY01_3	Only identified by site	Reverse	Student's T-test Significant SSX2_IgG	Student's T-test significant	Peptides	Intensity	-Log Student's T-test p-value SSX2_IgG	Student's T-test q-value SSX2_IgG	Student's T-test Difference SSX2_IgG	Student's T-test Test statistic SSX2_IgG	Gene ID
22.7692	22.881	23.4096	19.6233	18.7159	19.5142			+	SSX2_IgG	2	50273000	3.37159	0	-3.73547	-2.77195	A1BG
19.8137	19.6897	20.9043	22.7147	22.5781	22.69			+	SSX2_IgG	8	383250000	2.54045	0	2.52506	1.81901	ACIN1
19.0836	19.0351	20.2774	24.4633	24.4725	24.1713			+	SSX2_IgG	14	1310900000	3.5195	0	4.90365	3.45786	ACTA1
27.8819	27.3675	27.7345	28.007	27.9066	27.9134					19	12036000000	0.83365	0.713596	0.280995	0.243006	ACTG1
20.3614	19.6597	19.0586	22.8356	22.7652	22.9475			+	SSX2_IgG	5	434780000	2.93948	0	3.15618	2.28681	ACTL6A
22.4563	20.8558	18.844	25.6724	24.5547	24.572			+	SSX2_IgG	27	2006800000	1.71957	0	4.21432	1.99873	ADAR
19.0122	20.3765	19.8835	23.1688	23.0796	23.0866			+	SSX2_IgG	12	523880000	2.95658	0	3.35428	2.39611	ADNP
23.1456	22.8005	22.7061	22.1353	23.2187	22.4888					12	400540000	0.319792	0.773316	-0.269803	-0.200476	AHNAK
20.4803	19.5332	21.9733	20.1418	20.1661	20.2357					3	68559000	0.271097	0.655803	-0.481031	-0.281175	AKAP8
25.8278	26.5785	27.8073	21.1193	20.6423	21.8874			+	SSX2_IgG	6	436270000	2.89911	0	-5.52151	-3.2837	AKR1B10
24.2595	25.5375	26.4156	20.92	21.5176	21.5154			+	SSX2_IgG	4	243320000	2.46894	0	-4.08652	-2.46657	AKR1C2
28.5424	27.973	28.3928	25.6795	25.9659	25.9914			+	SSX2_IgG	16	2229700000	3.59551	0	-2.42378	-2.02383	ALB
26.6077	27.3632	27.6796	23.1991	24.2055	23.262			+	SSX2_IgG	8	541860000	2.88774	0	-3.66128	-2.51632	ALDH1A1
28.9261	28.9936	28.7782	26.543	26.4165	26.7732			+	SSX2_IgG	21	6997700000	4.34418	0	-2.32174	-2.06884	ANXA2
24.7169	25.7202	26.2413	18.6748	17.8898	18.7625			+	SSX2_IgG	2	131610000	3.76155	0	-7.11706	-4.66273	ANXA5
24.1834	23.3838	22.9582	22.0372	22.1048	19.0762			+	SSX2_IgG	5	94666000	1.0791	0.00675122	-2.43572	-1.18177	APOA4
23.328	25.0908	24.8423	20.0951	18.9424	21.8513			+	SSX2_IgG	5	60821000	1.82324	0	-4.12416	-2.05252	APOB
19.1146	19.3119	19.7536	22.6808	22.7459	22.5055			+	SSX2_IgG	7	379840000	4.05869	0	3.25075	2.70424	ARID1A
18.6848	19.3906	20.8811	22.6672	22.6329	22.117			+	SSX2_IgG	6	352170000	1.86361	0.000793893	2.82019	1.68734	ATAD3A
18.7996	20.9338	22.9284	21.4491	21.7433	20.4788					3	105870000	0.096157	0.836093	0.336476	0.149423	ATP5A1
18.7016	20.311	19.4007	25.2639	25.2129	25.0658			+	SSX2_IgG	13	2199400000	3.58041	0	5.70979	3.88502	BANP
18.7419	20.4494	20.0707	21.3644	21.404	21.4227			+	SSX2_IgG	4	162170000	1.47113	0.0123077	1.64301	1.08236	BAZ1A
19.265	18.6879	20.2807	23.3665	23.5055	23.4451			+	SSX2_IgG	14	657930000	3.0017	0	4.02784	2.74504	BAZ1B
18.1983	20.6211	20.886	22.7834	23.332	22.9657			+	SSX2_IgG	8	504400000	1.63945	0.00077037	3.12522	1.67102	BCLAF1
19.482	18.8588	20.135	22.3511	22.3511	22.3511			+	SSX2_IgG	1	23483000	2.82804	0	2.8592	2.08941	BRD7
19.2523	18.5148	19.1964	21.1238	21.1238	21.1238			+	SSX2_IgG	2	15390000	3.07546	0	2.13598	1.72662	BRD9
21.8979	19.837	19.7082	22.4727	22.212	22.314			+	SSX2_IgG	6	293720000	1.21952	0.0122523	1.85187	1.08079	BUB3
24.4454	24.7839	23.5475	22.291	23.3844	22.3423			+	SSX2_IgG	7	148210000	1.43821	0.0147611	-1.58635	-1.04859	C4B
21.8346	20.2208	20.0388	23.1831	23.3337	23.0098			+	SSX2_IgG	3	584460000	1.89255	0.000697987	2.47749	1.5697	CBX3
18.397	21.6051	19.3805	21.8028	21.7969	21.7426			+	SSX2_IgG	3	208350000	0.981009	0.0159134	1.98654	1.0192	CBX5
21.6471	21.1942	20.2208	24.8899	24.6528	24.0167			+	SSX2_IgG	15	1372700000	2.67513	0	3.4991	2.34056	CCAR2
19.1877	19.118	20.3293	20.5695	20.7135	20.6652					4	95111000	1.30982	0.0611218	1.10438	0.791698	CDC23
20.1958	20.0326	20.4694	20.9569	21.1922	20.8311					5	122340000	1.99642	0.129912	0.760814	0.6527	CDC27
18.012	19.9672	19.8174	21.8926	21.7658	21.9229			+	SSX2_IgG	5	222270000	1.83469	0.000712329	2.59491	1.59188	CDC5L
18.8456	21.1993	20.0946	21.2753	21.3773	21.1391					5	145950000	0.82556	0.085021	1.21739	0.723188	CDC73
19.2712	21.004	19.9111	19.2178	19.4833	19.1136					3	37037000	0.69578	0.27671	-0.790543	-0.520877	CEP170
18.7574	20.981	19.6209	20.3679	20.704	20.8547					11	95359000	0.574581	0.284149	0.855801	0.514611	CHD3
19.0017	20.153	21.4826	25.5171	26.3073	25.522			+	SSX2_IgG	38	3387500000	2.72675	0	5.56967	3.15854	CHD4
19.5638	19.8358	19.4785	23.2244	23.1174	23.0222			+	SSX2_IgG	8	528160000	5.04609	0	3.49527	3.11369	CHERP
20.1023	19.7355	19.2345	22.4135	22.6422	22.7595			+	SSX2_IgG	3	368750000	3.37126	0	2.91427	2.29247	CHTOP
20.3789	20.9519	20.6143	23.9774	24.1109	24.0237			+	SSX2_IgG	7	1008000000	4.41928	0	3.38897	2.89452	CNN3
19.1956	18.961	19.1164	20.9544	21.125	20.6897			+	SSX2_IgG	4	116250000	3.65578	0.000717241	1.83203	1.60118	CPSF2
20.626	21.4043	21.3914	22.391	22.3803	22.0606			+	SSX2_IgG	5	304240000	1.81792	0.04	1.13669	0.88859	CSNK2A1
18.8677	19.8524	19.7584	20.2375	20.4445	20.3068					2	77064000	1.22988	0.149169	0.836795	0.634133	CSNK2B
19.032	19.4514	19.7857	20.1561	20.3122	20.2169					3	71153000	1.64921	0.124271	0.805382	0.658691	CSTF1
19.5127	19.7643	19.7282	20.3514	20.4456	20.543					2	84095000	2.89903	0.0917924	0.778282	0.710069	CTBP1
18.5285	22.0617	20.2408	21.1612	21.1429	20.9298					6	166350000	0.321166	0.46985	0.800954	0.395958	CTNNB1
19.4567	19.5293	18.5988	20.3634	20.1536	20.2799					2	72857000	1.60815	0.0515606	1.07071	0.820488	CTR9
20.9122	20.1082	21.3439	21.2997	21.069	21.0669					4	125810000	0.40966	0.686272	0.357114	0.260628	DDX1
24.6617	25	24.5973	25.1334	25.3319	24.9318					20	2465000000	1.04772	0.588728	0.379393	0.324235	DDX17
19.1742	19.1171	20.0601	19.7328	19.9875	19.9216					2	55978000	0.613745	0.58473	0.430183	0.327222	DDX18
22.3149	22.059	19.8153	25.4722	24.7763	25.5541			+	SSX2_IgG	21	2371500000	2.01685	0	3.87109	2.11367	DDX21
21.4941	19.2215	20.869	21.5626	21.6507	21.6597					4	198780000	0.74112	0.129581	1.09618	0.65306	DDX23
24.3176	24.5747	25.1534	22.4027	22.3333	22.4443			+	SSX2_IgG	8	491350000	3.10692	0	-2.28844	-1.83182	DDX39A
25.3063	25.645	25.4014	26.5858	26.4116	27.3078			+	SSX2_IgG	22	3965700000	1.96802	0.0159826	1.3175	1.01948	DDX3X
20.9851	21.3137	19.9114	21.7952	21.7556	21.8702					8	233500000	1.18455	0.0733429	1.07027	0.751187	DDX46
27.254	27.3674	27.4495	27.2066	27.6083	27.2804					29	10215000000	0.0199281	0.991005	0.00812912	0.00715693	DDX5
19.1704	20.4647	20.358	19.7878	19.9176	19.8028					3	54205000	0.143882	0.879262	-0.161596	-0.114056	DDX50
18.8806	20.9221	19.8358	22.0404	21.9779	21.9114			+	SSX2_IgG	3	238300000	1.62298	0.00170811	2.09703	1.31813	DEK
24.019	23.9151	24.3288	25.0068	25.0151	25.0352					18	1994300000	2.76727	0.0501776	0.931379	0.828236	DHX15
25.8684	26.6221	27.0066	27.222	27.3188	27.2599					36	9407800000	1.07597	0.208606	0.767847	0.57497	DHX9
19.7107	19.4028	22.2294	21.6927	21.6892	22.0328					7	212660000	0.683897	0.0901944	1.35727	0.713395	DIEXF
18.7638	20.1168	19.1078	21.9972	22.1552	22.0017			+	SSX2_IgG	4	251850000	2.57591	0	2.72193	1.93138	DKC1
18.7143	20.4409	20.4158	24.4118	25.2334	24.2395			+	SSX2_IgG	5	161920000	2.74051	0	4.77125	2.89436	DPF2
20.8558	18.6228	20.3548	22.1426	23.2215	23.2153			+	SSX2_IgG	1	472170000	1.72181	0.000748201	2.91538	1.65119	DYNLL2
18.8333	18.3642	19.7179	26.5339	26.6033	26.5404			+	SSX2_IgG	52	5714100000	4.3528	0	7.58738	5.42928	EEA1
26.7519	26.6041	26.5085	25.708	25.9317	26.2772					8	2913700000	1.64483	0.240858	-0.649204	-0.550136	EEF1A1P5
19.105	22.8567	23.5938	21.7446	21.7563	20.7049					5	116850000	0.113937	0.792979	-0.449859	-0.184911	EEF2
19.238	20.4587	19.4915	21.8482	23.3407	23.153			+	SSX2_IgG	8	477920000	2.15447	0	3.05119	1.90835	EFTUD2
19.8369	19.1395	20.0393	19.6259	19.1499	19.3086					3	39890000	0.433814	0.719	-0.310403	-0.237607	EHMT2
19.4109	20.0242	18.3818	21.4311	21.0025	21.2939			+	SSX2_IgG	3	143520000	1.78362	0.00169892	1.97022	1.31739	EIF2AK2
22.3092	20.1744	22.033	23.5726	23.7698	24.0267			+	SSX2_IgG	10	835140000	1.54161	0.00174586	2.28417	1.35712	EIF4A3
24.3519	23.9555	22.259	26.0638	25.9881	26.04			+	SSX2_IgG	12	3609100000	1.75809	0.00122293	2.50846	1.52747	ELAVL1
21.2426	18.6696	20.4792	21.1338	21.1648	20.9735					2	133460000	0.556164	0.24556	0.960225	0.543962	ELOB
18.8406	19.344	20.2073	23.5895	23.4065	23.5918			+	SSX2_IgG	6	699220000	3.2618	0	4.06534	2.89604	EMG1
24.3901	24.2296	24.4475	23.3673	22.5693	23.0824			+	SSX2_IgG	4	157030000	2.29218	0.0124201	-1.34943	-1.08612	ENO1
22.3014	19.3875	18.6084	24.0806	24.0335	23.9306			+	SSX2_IgG	4	965500000	1.59655	0	3.91577	1.84292	ERH
18.1732	20.525	19.4811	19.9101	20.1909	20.2462					2	66246000	0.452224	0.408303	0.722609	0.428022	EWSR1
22.0723	23.0742	22.6756	23.051	22.9531	22.6617					7	507830000	0.375927	0.757696	0.281258	0.214075	FBL
23.7799	23.6353	24.2412	22.98	22.7278	22.7301			+	SSX2_IgG	7	254700000	2.22693	0.0385854	-1.07284	-0.893324	FLNA
23.2667	22.3404	22.278	22.0672	21.7878	22.1649					4	229980000	0.851956	0.350997	-0.621752	-0.464318	FSCN1
18.9965	19.8813	21.2893	22.9558	22.9248	22.7993			+	SSX2_IgG	10	455210000	1.8772	0.0008	2.83754	1.69984	FUBP3
26.0574	25.9415	24.9955	25.2267	25.7369	25.36					6	2332100000	0.238309	0.819698	-0.223565	-0.163259	FUS
25.7007	25.6385	26.0684	22.6956	19.083	20.7657			+	SSX2_IgG	3	159960000	2.03381	0	-4.95441	-2.41412	G6PD
25.3307	24.5266	25.0093	22.2522	22.3759	22.7818			+	SSX2_IgG	5	276460000	3.03189	0	-2.48559	-1.93703	GAPDH
19.4203	20.445	19.5872	20.4604	20.0189	20.2066					2	71025000	0.528845	0.616433	0.411119	0.306295	GAR1
19.4682	20.4159	19.9206	21.1061	21.171	21.1062			+	SSX2_IgG	3	132500000	1.91349	0.0304268	1.19283	0.9359	GATAD2A
24.648	23.865	23.7079	21.7462	21.9727	22.2781			+	SSX2_IgG	3	150320000	2.48997	0.000693333	-2.07458	-1.56093	GC
20.1569	19.7185	20.1617	24.7397	24.6113	24.8891			+	SSX2_IgG	5	1625200000	5.03111	0	4.73431	4.05531	GERRY_SSX1
23.7748	23.4664	25.1863	23.842	23.6522	23.5706					15	1061300000	0.35251	0.632729	-0.454213	-0.295806	GTF2I
19.5172	19.4296	18.1553	19.5586	19.6812	20.0301					3	51222000	0.714496	0.308722	0.722633	0.494213	GTF3C1
18.5932	21.0614	20.1727	21.4237	21.2283	21.2769					4	154110000	0.879291	0.0606222	1.36721	0.79299	H2AFY
25.7042	25.1532	24.9394	26.4972	26.1592	26.5975			+	SSX2_IgG	5	5200800000	1.9227	0.0356379	1.1524	0.912013	H3F3B
20.4251	20.4934	20.3353	23.4826	23.2918	23.4775			+	SSX2_IgG	8	645140000	5.57023	0	2.99939	2.78314	HDAC2
22.7211	20.0413	20.3385	23.5591	23.8181	23.7148			+	SSX2_IgG	7	818210000	1.45302	0.00186982	2.6637	1.43873	HIST1H1B
23.0274	22.4886	22.7514	24.582	24.7233	24.7286			+	SSX2_IgG	7	1476900000	3.53083	0.000759124	1.92217	1.65304	HIST1H1C
27.4989	27.9416	28.2976	26.5475	26.3071	26.4825			+	SSX2_IgG	4	6149900000	2.42786	0.00671845	-1.46697	-1.18123	HIST1H2AJ
26.2697	25.9328	25.6515	27.5242	27.3806	27.6605			+	SSX2_IgG	8	7469300000	2.87975	0.00168984	1.57045	1.31296	HIST1H2BL
27.6715	27.3654	27.3918	27.9273	27.958	28.3322					11	14588000000	1.6662	0.28616	0.596262	0.512745	HIST1H4A
18.9897	20.4486	19.8701	21.0255	21.2238	21.2432			+	SSX2_IgG	7	135990000	1.50136	0.023038	1.3947	0.975452	HIST2H2BE
21.4612	21.7915	21.5733	22.6239	22.3541	22.8151			+	SSX2_IgG	3	399110000	2.40761	0.0470275	0.989042	0.848832	HIST2H3PS2
22.699	20.753	22.9793	23.6667	23.7044	23.184					4	887850000	0.890069	0.058	1.37458	0.799258	HNRNPA0
25.5457	25.6301	26.4081	25.9645	25.2492	25.4682					12	2963200000	0.361936	0.740364	-0.300699	-0.223303	HNRNPA1
26.757	26.0535	25.5192	27.5726	27.5855	27.5873			+	SSX2_IgG	17	8440600000	1.8304	0.0123636	1.47189	1.08351	HNRNPA2B1
26.5446	26.9002	26.4971	27.629	27.62	27.9213			+	SSX2_IgG	17	13215000000	2.58246	0.0311203	1.0761	0.92674	HNRNPA3
24.5001	24.7258	25.1395	22.9251	22.5194	22.8981			+	SSX2_IgG	10	805220000	3.03364	0.000737589	-2.00761	-1.6342	HNRNPAB
27.4083	27.9547	28.0699	29.4919	29.5215	29.6652			+	SSX2_IgG	16	38653000000	2.93664	0.00189222	1.74855	1.44392	HNRNPC
26.1547	25.5921	25.9999	26.9957	26.5978	26.8791					12	7300800000	1.94158	0.0728315	0.908628	0.753922	HNRNPD
24.2521	25.0578	24.8694	24.1799	23.8433	24.0043					8	1552000000	1.28373	0.218543	-0.717312	-0.568385	HNRNPDL
20.4379	23.3023	19.5093	25.0933	25.3522	25.1137			+	SSX2_IgG	10	2093500000	1.63711	0	4.10321	1.91336	HNRNPF
26.6341	26.1023	25.9757	27.2199	27.1919	27.1922					15	8843500000	2.05486	0.0560599	0.963953	0.802016	HNRNPH1
18.3651	19.1717	19.9637	22.8237	22.864	22.738			+	SSX2_IgG	12	439810000	2.85019	0	3.64174	2.48924	HNRNPH2
19.1744	19.7383	20.4242	22.4658	22.2493	22.1548			+	SSX2_IgG	4	297410000	2.59618	0	2.51104	1.829	HNRNPH3
25.9034	25.4981	25.152	27.8839	27.9777	27.84			+	SSX2_IgG	16	11596000000	3.37781	0	2.38265	1.95156	HNRNPK
25.8109	24.4373	24.1359	27.1164	27.4391	27.2066			+	SSX2_IgG	19	8211700000	2.02793	0.000722222	2.45936	1.61336	HNRNPL
25.1625	25.0542	24.9615	28.0418	27.9029	27.8677			+	SSX2_IgG	36	12530000000	5.47615	0	2.87805	2.66803	HNRNPM
25.4507	24.9948	24.5673	27.0557	27.1054	27.3532			+	SSX2_IgG	19	9090400000	2.87657	0.0008125	2.16716	1.70488	HNRNPR
27.272	26.6092	26.5841	28.0291	28.1147	28.1212			+	SSX2_IgG	24	17150000000	2.29484	0.0151754	1.26658	1.03212	HNRNPU
22.4907	21.4745	23.3288	23.9873	23.45	23.6617					11	764030000	1.06745	0.0520301	1.26829	0.813829	HNRNPUL1
21.7213	22.9894	19.0859	27.4217	27.6448	28.3152			+	SSX2_IgG	32	13032000000	2.28188	0	6.52837	2.99385	HNRNPUL2
18.5087	19.3723	18.4854	22.1593	22.3257	22.4944			+	SSX2_IgG	9	306210000	3.48725	0	3.53769	2.70582	HP1BP3
25.2558	28.2148	26.4622	22.9622	23.1068	19.3559			+	SSX2_IgG	4	419770000	1.4947	0	-4.83598	-1.93613	HPX
23.325	23.0081	24.0513	22.6972	22.9554	22.6726					6	133210000	1.00058	0.278435	-0.686368	-0.519276	HSP90AB1
21.8601	23.0004	22.4695	22.3832	22.3236	22.2591					8	203340000	0.135058	0.897959	-0.121369	-0.0911602	HSPA1A
24.3246	23.9968	23.9853	22.3615	22.9898	22.5772			+	SSX2_IgG	6	177290000	2.60696	0.00535961	-1.45942	-1.20087	HSPA5
18.8087	19.6102	19.6853	22.5548	22.7681	23.0018			+	SSX2_IgG	7	422610000	3.41602	0	3.40682	2.60303	HSPA6
26.4287	26.4403	27.7066	26.1963	26.4367	26.2675					25	4334500000	0.578519	0.479759	-0.558325	-0.390441	HSPA8
25.4463	25.5383	26.046	22.9525	22.9012	22.7058			+	SSX2_IgG	10	542190000	3.82641	0	-2.82371	-2.35103	HSPA9
24.152	24.5305	23.5217	22.7349	23.5472	22.6889					9	382200000	1.24838	0.0677964	-1.07774	-0.766905	HSPD1
19.0881	20.7842	19.0318	20.2622	20.3912	20.057					3	71775000	0.44345	0.496672	0.602063	0.380293	IGF2BP1
19.2955	26.7131	26.7369	23.9066	23.8135	23.5917					3	906930000	0.0672757	0.853178	-0.477856	-0.137384	IGHG1
24.6713	26.1767	25.2549	27.1081	27.1494	27.1439			+	SSX2_IgG	12	8851400000	1.80258	0.00436923	1.76614	1.22783	ILF2
23.9631	23.9814	22.5164	27.8432	28.2099	27.8972			+	SSX2_IgG	30	14903000000	3.07712	0	4.49645	3.00044	ILF3
17.6158	19.8319	19.0463	21.3564	21.8724	21.8824			+	SSX2_IgG	4	207870000	1.89026	0	2.87241	1.71842	IMP3
23.4633	23.8328	24.3186	19.8446	19.2907	18.886			+	SSX2_IgG	3	46886000	3.58284	0	-4.53113	-3.30208	ITIH2
19.1343	19.1597	19.9138	21.8396	21.5641	21.9414			+	SSX2_IgG	6	208980000	2.98122	0	2.37911	1.85948	KANK2
22.73	22.3633	22.7512	24.7219	24.8224	24.8868			+	SSX2_IgG	6	1629700000	4.08093	0	2.19554	1.93485	KHDRBS1
22.2188	22.6641	23.2181	24.109	24.099	24.1477			+	SSX2_IgG	15	947650000	2.09472	0.0112778	1.41825	1.09993	KHSRP
18.5948	19.4293	19.5331	20.7787	20.8741	20.6641			+	SSX2_IgG	4	104240000	2.19601	0.00484422	1.58657	1.21749	KIAA1429
20.7035	20.7905	21.958	21.6892	21.6914	21.6411					7	257540000	0.575526	0.509432	0.523249	0.372474	KPNB1
30.8228	30.2055	30.017	26.8304	26.8853	27.0121			+	SSX2_IgG	24	5789800000	3.79636	0	-3.43918	-2.75305	KRT1
29.036	28.3598	28.1207	26.5101	26.5236	26.6253			+	SSX2_IgG	24	4204700000	2.67343	0.00123077	-1.95245	-1.52956	KRT10
23.8065	23.7298	23.8273	19.6074	19.3084	18.3991			+	SSX2_IgG	8	33815000	3.67432	0	-4.68289	-3.43187	KRT14
25.9256	25.92	24.5094	21.1972	19.1798	20.2938			+	SSX2_IgG	9	132530000	2.65253	0	-5.22806	-2.98763	KRT16
26.0276	25.9094	26.1199	23.5643	23.7094	23.8522			+	SSX2_IgG	13	383190000	4.63041	0	-2.31036	-2.09455	KRT18
27.6838	26.7742	26.4733	25.7481	25.8364	25.8368			+	SSX2_IgG	21	2319300000	1.4848	0.0470952	-1.17002	-0.857106	KRT2
25.5411	24.4052	23.6533	18.413	22.2059	19.1921			+	SSX2_IgG	11	108550000	1.6392	0	-4.59619	-2.01579	KRT5
22.0983	20.6756	19.9703	18.8723	18.8961	18.9366			+	SSX2_IgG	9	8480700	1.4891	0.0044375	-2.01308	-1.23798	KRT6B
26.597	26.7761	27.2417	23.26	23.4575	23.6683			+	SSX2_IgG	15	520090000	3.95327	0	-3.40969	-2.78246	KRT8
29.4055	28.5259	27.3675	24.3353	24.3637	24.4852			+	SSX2_IgG	13	1125800000	2.6173	0	-4.03824	-2.53669	KRT9
19.5846	19.255	18.9914	22.212	21.9353	22.2245			+	SSX2_IgG	4	264080000	3.88527	0	2.84692	2.38067	LAS1L
23.9409	24.8629	23.7423	19.4978	22.0184	21.572			+	SSX2_IgG	3	124230000	1.68486	0.000806202	-3.15264	-1.70426	LDHA
19.5248	19.3289	19.0317	19.7489	20.3281	20.3679					3	68379000	1.59078	0.105388	0.853153	0.684663	LEO1
27.3528	26.567	25.7555	26.6054	26.6477	26.5195					35	4726700000	0.0234423	0.978506	0.0324478	0.0221842	LMNA
25.0809	24.2923	24.3981	25.3303	25.4428	25.346					23	2216700000	1.4559	0.155553	0.782578	0.626265	LMNB1
24.6315	23.7945	23.1798	25.4065	25.4983	25.3678			+	SSX2_IgG	30	2672100000	1.6744	0.0125346	1.55558	1.09358	LMNB2
19.1058	19.8085	19.4659	20.1617	20.6432	20.4967					5	82715000	1.76608	0.0652059	0.973788	0.780323	LMO7
18.1467	19.7846	20.0755	20.574	20.9038	20.325					2	97324000	0.949947	0.065348	1.26534	0.779475	LRRC59
23.0581	24.0367	24.2521	23.2124	22.3671	22.0025			+	SSX2_IgG	10	464030000	1.14996	0.049845	-1.25497	-0.829341	LUC7L2
19.4046	19.8092	19.7658	21.2541	21.042	21.3561			+	SSX2_IgG	3	143270000	3.22488	0.00172678	1.55754	1.34488	LUC7L3
18.4073	20.8408	19.3805	23.1285	23.1385	23.2526			+	SSX2_IgG	7	645630000	2.16374	0	3.63032	2.12515	LUZP1
25.2538	24.1483	24.2769	27.3132	27.2976	27.4041			+	SSX2_IgG	26	9359600000	2.8625	0	2.77864	2.05728	MATR3
19.0004	18.6944	19.7411	19.158	19.8287	19.5166					3	43269000	0.413136	0.684412	0.355798	0.260433	MBD3
21.675	22.0764	20.1185	21.1703	20.959	21.5261					6	140390000	0.0391969	0.949166	-0.0714906	-0.0441417	MCM3
19.5843	21.3643	19.9031	20.6795	20.7656	20.753					4	101180000	0.337937	0.642	0.4488	0.289805	MCM5
19.4641	20.1907	20.8473	24.3397	24.4164	24.2641			+	SSX2_IgG	34	1230300000	3.31359	0	4.17269	2.97653	MDN1
19.7445	20.8604	20.2924	20.9732	21.1452	21.3915					3	137470000	1.18919	0.133365	0.870875	0.647846	MEOX2
19.0983	19.7986	18.9582	20.9547	20.8015	20.12			+	SSX2_IgG	2	96270000	1.66977	0.0223149	1.34035	0.981788	MFAP1
19.295	19.603	20.4187	23.2076	23.2024	23.0708			+	SSX2_IgG	8	543160000	3.25322	0	3.38804	2.53177	MPHOSPH10
18.7699	20.0222	19.9646	24.4255	24.3803	24.3665			+	SSX2_IgG	15	1267900000	3.52423	0	4.8052	3.41138	MRE11
18.5886	20.3764	20.3483	21.1042	21.136	21.1176			+	SSX2_IgG	2	132280000	1.07154	0.0468438	1.34814	0.847162	MRPS16
18.7476	20.4098	20.7971	20.6135	20.6909	20.8246					4	99057000	0.501498	0.379777	0.724824	0.444227	MRPS18B
18.607	19.0919	20.4175	20.8058	20.7188	20.6695			+	SSX2_IgG	2	100570000	1.17789	0.040416	1.35924	0.881166	MRPS2
18.8424	19.5668	19.8501	20.9258	20.3708	20.6826			+	SSX2_IgG	5	95913000	1.65951	0.0323967	1.23995	0.925096	MRPS22
18.1757	19.4539	20.4394	21.3228	21.5081	21.3235			+	SSX2_IgG	4	158870000	1.43345	0.00434694	2.02849	1.22333	MRPS23
18.8783	19.227	19.5267	19.9613	20.6921	19.8917					2	71389000	1.42449	0.0793357	0.970988	0.737144	MRPS25
20.3404	20.028	19.9827	20.9045	21.0257	21.2722					5	127490000	2.43501	0.0515573	0.950439	0.82216	MRPS26
18.8713	19.4178	19.2755	21.7977	21.5237	21.7955			+	SSX2_IgG	4	197500000	3.75153	0	2.51739	2.1203	MRPS28
19.2037	19.8067	18.2336	20.5488	20.7151	20.8797			+	SSX2_IgG	2	99768000	1.59955	0.010892	1.63313	1.11243	MRPS33
19.5026	19.2029	20.0629	21.6717	21.6771	21.2512			+	SSX2_IgG	4	176280000	2.59543	0.0012	1.94386	1.50827	MRPS34
18.5137	20.3289	19.621	19.4842	20.1076	19.6285					3	52777000	0.169955	0.821569	0.252253	0.161616	MRPS35
19.3024	20.0378	19.9127	21.0424	20.754	21.194			+	SSX2_IgG	2	121230000	2.05298	0.0215622	1.24582	0.987744	MRPS5
19.2244	18.8944	18.9517	20.9463	20.9331	20.8035			+	SSX2_IgG	3	112430000	4.13056	0.000776119	1.87079	1.68307	MRPS6
18.9996	19.5377	20.6426	22.0674	21.9241	21.8978			+	SSX2_IgG	5	236330000	1.99778	0.00195062	2.23644	1.50454	MRPS7
20.5146	21.7319	20.7596	23.2276	23.0748	24.751			+	SSX2_IgG	14	918680000	1.83424	0.000732394	2.68243	1.6242	MTA2
18.6208	18.6286	20.0765	20.9058	20.9227	21.0773			+	SSX2_IgG	2	118410000	1.72611	0.00332632	1.86001	1.25085	MTSS1
18.8954	18.7843	19.8424	20.7689	20.8858	20.6209			+	SSX2_IgG	6	103260000	1.99916	0.00668599	1.58449	1.17864	MYBBP1A
22.0273	21.1909	21.5974	21.4216	21.4439	21.5922					3	169560000	0.183849	0.896469	-0.119265	-0.0956159	MYL6
18.0861	19.9454	19.4882	22.7529	22.7014	22.6773			+	SSX2_IgG	10	395920000	2.49366	0	3.53732	2.2678	NBN
18.9062	20.3196	20.3997	20.5901	20.4484	20.3205					2	83219000	0.516061	0.482937	0.577806	0.387461	NCOA5
18.8481	20.2352	19.8622	21.0035	20.7922	20.9675			+	SSX2_IgG	3	114430000	1.41277	0.0387429	1.27262	0.896493	NFIB
18.8392	20.6229	19.6592	20.8273	21.1965	21.1546			+	SSX2_IgG	3	127000000	1.20261	0.0407419	1.35238	0.884765	NFIX
19.7326	20.7905	19.1878	20.716	20.6033	20.551					4	93290000	0.693111	0.313115	0.719838	0.488681	NKRF
22.9246	22.5755	21.6176	22.7385	22.0828	22.6404					6	318160000	0.0928073	0.909118	0.114689	0.0795973	NME2
19.0404	19.3885	20.3431	20.2795	20.3963	20.0364					2	70856000	0.734494	0.356155	0.646732	0.460779	NOC2L
17.9899	20.3199	18.0084	21.4322	21.4908	21.2844			+	SSX2_IgG	4	160640000	1.55964	0.00191515	2.62971	1.48066	NOL9
20.6587	20.213	20.5149	22.4233	22.4486	22.4681			+	SSX2_IgG	5	329670000	3.94325	0	1.9845	1.75314	NONO
17.67	20.432	21.6688	20.6672	21.038	21.0624					5	115860000	0.348632	0.364556	0.998913	0.456349	NOP56
18.6867	22.686	20.013	24.0994	23.5933	23.5854			+	SSX2_IgG	4	920010000	1.30034	0.00119255	3.2975	1.50685	NPM1
18.4203	19.9408	20.1944	20.0359	20.5642	20.2057					2	74495000	0.58115	0.332807	0.750118	0.47614	NR2F2
25.5331	25.7125	26.6112	22.1869	20.8348	19.0241			+	SSX2_IgG	2	202900000	2.24625	0	-5.27034	-2.66848	NRAS
22.2274	19.8987	19.7787	22.1676	22.1202	22.2549			+	SSX2_IgG	3	272870000	0.903965	0.0450996	1.54596	0.859844	NUDT21
22.2992	22.628	22.2331	25.0695	24.8741	24.8638			+	SSX2_IgG	31	1737400000	4.28085	0	2.54906	2.2375	NUMA1
22.7757	23.3621	23.4641	22.649	23.0133	22.9004					8	486990000	0.652829	0.657497	-0.346402	-0.279355	PABPC1
18.8477	19.8943	20.2691	24.4554	24.5985	24.6218			+	SSX2_IgG	7	1428600000	3.47253	0	4.88819	3.42188	PACSIN3
23.844	24.1124	24.0468	24.7947	24.5193	24.7149					6	811730000	2.37716	0.173511	0.675237	0.605619	PCBP1
18.8865	20.7172	19.8127	19.4373	19.1889	19.1115					2	36031000	0.447746	0.525348	-0.559589	-0.363948	PDS5A
21.4472	20.2142	20.6765	24.9495	24.9261	24.8788			+	SSX2_IgG	16	1835500000	3.4846	0	4.13883	3.04271	PELP1
19.733	19.3998	18.7874	20.447	20.7328	20.8538			+	SSX2_IgG	3	98103000	1.97881	0.0144286	1.37109	1.05304	PHF5A
20.067	23.8031	23.7453	21.5857	21.1454	21.7513					2	143070000	0.346673	0.352048	-1.04434	-0.464355	PIK3R2
23.8398	25.849	26.6407	21.0985	19.0865	19.3928			+	SSX2_IgG	4	169540000	2.23213	0	-5.58392	-2.73396	PKM
25.8634	25.8606	25.7364	26.0689	25.8664	26.0674					71	4769100000	1.07247	0.816251	0.180775	0.167504	PLEC
19.9276	19.9873	19.732	20.9481	21.2481	21.3898			+	SSX2_IgG	4	140010000	3.01304	0.00850943	1.31304	1.14048	PLRG1
20.2667	19.5305	19.3358	21.7854	23.2099	22.8864			+	SSX2_IgG	9	422630000	2.31621	0	2.91623	1.92366	PNN
18.7376	19.89	21.2934	20.1125	20.1071	20.2633					2	67514000	0.0899705	0.885402	0.187255	0.107572	POGZ
18.4972	19.9578	21.1659	20.7848	20.7647	21.0368					3	110350000	0.565499	0.234532	0.988489	0.556433	POLDIP3
20.9219	20.1929	19.4729	24.4489	23.3945	23.8442			+	SSX2_IgG	20	937960000	2.69212	0	3.69999	2.43745	POLR2A
18.1132	20.1987	19.3772	23.5667	23.5813	23.5906			+	SSX2_IgG	14	724320000	2.69853	0	4.34985	2.70754	POLR2B
19.2809	20.1773	19.7955	21.0861	21.3357	21.31			+	SSX2_IgG	3	144290000	2.27263	0.00715385	1.49275	1.17396	POLR2E
25.1982	25.4183	18.842	24.1961	24.1187	22.8637					4	236300000	0.0930247	0.800525	0.573336	0.179215	PPIA
18.8949	21.2547	19.4763	20.841	20.561	20.5178					4	95107000	0.460534	0.377706	0.764647	0.445339	PPP1CA
27.0253	27.1117	27.1847	26.6538	26.1377	26.4008					13	3398200000	1.9827	0.166164	-0.709799	-0.614039	PRDX1
18.0046	19.3647	19.1037	20.6122	20.0518	20.2468			+	SSX2_IgG	3	85801000	1.5248	0.0160524	1.47926	1.02163	PRDX2
24.2544	23.8573	23.8209	25.1736	25.4042	25.3403			+	SSX2_IgG	49	2492000000	2.99298	0.008	1.3285	1.15027	PRKDC
20.6895	20.5312	21.2212	22.0559	21.6143	21.8245					6	230320000	1.8497	0.051366	1.01757	0.817618	PRMT1
30.0497	19.6539	20.4134	28.8723	28.973	28.3324			+	SSX2_IgG	7	12021000000	0.731755	0.00439175	5.35352	1.23019	PRPF19
18.9869	19.6883	20.1311	22.5141	22.2584	22.3614			+	SSX2_IgG	7	318310000	2.90554	0	2.77584	2.06955	PRPF40A
19.641	20.8269	18.8545	19.0537	19.8662	19.4211					2	42818000	0.203839	0.773638	-0.327129	-0.201993	PRPF4B
19.3064	20.1617	19.7397	21.7897	21.6739	22.1438			+	SSX2_IgG	8	223220000	2.77146	0.000764706	2.1332	1.66072	PRPF6
20.0319	23.11	22.9325	24.8653	24.9425	24.7183			+	SSX2_IgG	34	1592300000	1.31917	0.00183721	2.81725	1.40866	PRPF8
19.9297	20.0469	19.8567	21.7385	21.719	21.7099			+	SSX2_IgG	4	199650000	5.22989	0.000781955	1.77804	1.68365	PRRX1
22.9652	23.3188	20.7084	23.2897	23.3416	23.4808					7	652620000	0.563318	0.214885	1.03988	0.571491	PSIP1
24.7706	24.1269	24.5714	26.309	26.4598	26.3437			+	SSX2_IgG	9	3531300000	3.18429	0.000702703	1.88118	1.57335	PTBP1
19.9708	18.366	19.487	21.0344	21.0278	20.8547			+	SSX2_IgG	4	118910000	1.62145	0.00796209	1.69764	1.14791	PTCD3
22.2624	21.4329	19.8807	22.7224	23.276	23.276			+	SSX2_IgG	8	517770000	1.23555	0.0113302	1.89945	1.10305	PUF60
19.7147	19.6369	21.8781	21.7846	21.9718	21.7578					4	216710000	0.903498	0.0513612	1.42818	0.821965	RACK1
18.9003	20.7113	18.5008	20.2648	20.3626	20.3069					3	75710000	0.621252	0.230844	0.940587	0.559641	RAD21
21.8132	22.0426	19.5979	25.7445	24.995	24.9457			+	SSX2_IgG	34	2408800000	2.11467	0	4.07719	2.23873	RAD50
19.8734	20.171	20.9788	26.0818	26.2709	26.0613			+	SSX2_IgG	13	4175000000	4.17434	0	5.79697	4.33611	RALY
22.8511	19.4791	20.0281	21.8059	21.733	21.5105					3	172360000	0.356143	0.389251	0.897043	0.437934	RAN
19.7928	23.8181	21.9315	22.6426	23.1212	22.9876					13	467710000	0.384209	0.310152	1.06966	0.492599	RANBP2
23.3566	23.1789	22.5278	22.774	22.4671	22.8032					6	363950000	0.548655	0.674398	-0.339688	-0.266648	RBBP4
18.9694	20.3246	21.0005	21.0828	20.941	21.0214					3	122530000	0.698256	0.210084	0.916908	0.573578	RBFOX2
18.7766	20.5112	20.5216	22.4004	22.4248	22.2899			+	SSX2_IgG	7	313010000	1.85933	0.000675325	2.43524	1.53989	RBM12B
21.9737	20.3786	19.826	24.053	24.1915	24.342			+	SSX2_IgG	16	1173000000	2.22838	0	3.46942	2.10363	RBM14
19.7299	20.294	20.5032	21.7043	21.5938	21.6324			+	SSX2_IgG	7	187790000	2.48753	0.00678431	1.46785	1.19029	RBM15
20.9382	19.5242	20.868	22.1629	21.6877	21.8602			+	SSX2_IgG	5	255840000	1.41495	0.0219658	1.46014	0.986201	RBM22
19.7457	19.779	20.3309	23.9729	23.9611	23.8898			+	SSX2_IgG	11	933570000	4.5032	0	3.98943	3.34816	RBM25
24.5854	25.4428	24.5513	22.113	21.854	22.0095			+	SSX2_IgG	6	430770000	3.16772	0	-2.86765	-2.20382	RBM39
17.8065	19.8956	19.7462	22.7784	22.6251	22.7684			+	SSX2_IgG	7	401190000	2.21503	0	3.57454	2.13446	RBM4
19.2969	19.2398	18.752	24.5463	24.5354	24.7559			+	SSX2_IgG	9	1483500000	5.10252	0	5.51628	4.64646	RBMX
23.1654	23.5312	23.6174	21.9018	21.9862	21.6389			+	SSX2_IgG	7	384280000	3.10897	0.00175556	-1.59571	-1.35967	RCC1
21.4753	20.1589	19.7119	21.7338	21.6401	21.7597					6	236120000	1.11916	0.0510651	1.2625	0.824891	RCC2
18.4064	19.5259	19.9507	22.5195	22.4093	22.2058			+	SSX2_IgG	2	323240000	2.55546	0	3.08388	2.09837	RNPS1
21.2827	21.2883	21.3359	20.8381	20.8421	20.3119					3	77649000	1.64619	0.245969	-0.638297	-0.542363	RPL10A
19.4665	21.0948	19.9155	21.5799	21.5626	21.1874			+	SSX2_IgG	5	167140000	1.20212	0.0469091	1.28438	0.855023	RPL4
19.6867	20.7184	19.0894	21.7144	21.4234	21.5767			+	SSX2_IgG	4	182720000	1.64341	0.00761722	1.74002	1.17319	RPL7
19.0084	20.007	20.0204	20.0199	20.0208	20.6287					2	71689000	0.625492	0.479874	0.544519	0.391255	RPRD1B
17.7495	19.9897	20.4554	20.8366	20.9307	20.7148					3	108660000	0.787426	0.0651095	1.42916	0.777742	RPS10
20.7331	21.4224	20.1386	22.8161	23.2322	23.6043			+	SSX2_IgG	7	628360000	2.31167	0.000818898	2.45285	1.70901	RPS11
22.4365	21.6487	20.0302	22.52	22.5064	22.7108					4	373430000	0.782736	0.0940069	1.20725	0.70543	RPS12
18.8931	18.8061	18.4413	21.6875	22.6222	22.1619			+	SSX2_IgG	3	287780000	3.46483	0	3.44372	2.6424	RPS13
21.4474	20.1894	21.8927	22.1526	22.4895	22.2977					3	273560000	1.02789	0.0742776	1.13677	0.748234	RPS15A
19.1694	20.016	19.1431	21.9677	22.1579	22.1838			+	SSX2_IgG	4	261970000	3.07894	0	2.66031	2.05481	RPS16
19.8967	20.7373	19.6307	21.2573	22.0383	21.1312			+	SSX2_IgG	3	186640000	1.46974	0.0242017	1.38735	0.96488	RPS17
19.6569	19.9868	21.4139	22.6663	22.3757	22.2966			+	SSX2_IgG	6	362460000	1.7194	0.00173626	2.09368	1.35009	RPS18
22.0996	22.0778	21.2831	22.6393	22.1844	21.9835					7	345440000	0.607366	0.568383	0.448877	0.337162	RPS19
20.0633	19.3649	21.379	22.3315	22.277	21.9883			+	SSX2_IgG	5	290810000	1.48966	0.00538614	1.92986	1.20619	RPS2
20.1367	19.4071	19.3487	22.2098	22.3218	21.7007			+	SSX2_IgG	2	264070000	2.81658	0	2.44662	1.85707	RPS20
19.7675	18.2579	20.231	22.0038	22.1731	21.9723			+	SSX2_IgG	3	227450000	1.92965	0.000742857	2.63094	1.64543	RPS21
19.9614	19.1428	18.9965	20.9572	20.6183	20.6853			+	SSX2_IgG	3	102230000	1.92071	0.0143644	1.3867	1.05245	RPS23
22.4973	21.0719	22.5164	22.4724	22.9813	22.4097					4	338890000	0.507168	0.478559	0.592587	0.392069	RPS25
20.0857	20.1998	18.9187	20.4863	20.4126	20.4555					1	82835000	0.808921	0.289411	0.716754	0.508373	RPS27
19.722	21.9984	19.6824	20.9373	21.3959	20.9668					2	132310000	0.334606	0.537333	0.632418	0.355353	RPS29
22.495	22.4186	22.8721	23.0536	23.0042	22.752					7	529900000	0.948245	0.639118	0.341354	0.292145	RPS3
22.3097	22.4868	19.0175	23.1978	23.7144	22.9322			+	SSX2_IgG	10	691020000	0.807663	0.0303	2.01017	0.934438	RPS3A
21.6794	22.9814	22.4383	22.749	23.2285	23.1372					6	470660000	0.762957	0.329728	0.671899	0.478159	RPS4X
19.6886	20.0473	19.8421	20.799	20.7579	20.756					3	103230000	3.01629	0.0512615	0.911655	0.82514	RPS5
19.1671	18.753	19.6885	22.1227	22.2357	22.0273			+	SSX2_IgG	2	271630000	3.34066	0	2.92568	2.29056	RPS6
19.3016	18.6896	19.9193	22.7302	22.4827	22.6578			+	SSX2_IgG	6	375760000	3.1029	0	3.3201	2.43674	RPS8
21.0925	18.8853	22.3125	23.2774	23.1416	23.2798			+	SSX2_IgG	8	567520000	1.15669	0.00441451	2.46951	1.23231	RPS9
21.3636	20.8199	20.7907	22.2144	22.5614	21.9122			+	SSX2_IgG	3	302650000	2.02571	0.0222203	1.23795	0.97913	RPSA
18.1177	20.4304	21.6564	20.8534	21.1329	21.1034					4	124180000	0.389392	0.341453	0.961725	0.471147	RTCB
21.7378	22.286	21.8475	23.2915	23.3325	23.1568			+	SSX2_IgG	10	556560000	2.75372	0.0108411	1.30316	1.10842	RUVBL1
22.3001	21.5883	21.4759	23.6108	23.4798	23.4804			+	SSX2_IgG	9	527730000	2.57144	0.00177528	1.73553	1.37554	RUVBL2
19.8445	19.6224	19.7431	19.7641	19.6808	19.7147					2	46023000	0.0869827	0.98329	-0.016812	-0.0157325	S100A11
22.7585	23.5322	23.5052	25.5144	25.4464	25.5459			+	SSX2_IgG	21	2612400000	3.02968	0	2.23694	1.78213	SAFB
20.2062	20.7601	21.4284	23.3857	23.2431	23.3339			+	SSX2_IgG	19	609710000	2.68003	0	2.52263	1.86065	SAFB2
17.9203	19.0967	19.9825	21.2064	21.2446	21.1686			+	SSX2_IgG	3	139960000	1.67824	0.00178531	2.20672	1.38122	SAMD1
18.0217	19.5557	22.1691	21.2756	21.1444	21.1888					3	148150000	0.45872	0.199003	1.28744	0.582205	SAP18
20.1939	20.2658	19.749	21.2195	21.4543	21.3333			+	SSX2_IgG	4	153800000	2.71039	0.0121973	1.26612	1.0773	SART1
19.2471	19.4268	20.2979	20.2791	20.6168	20.3348					3	81214000	1.03746	0.228752	0.753032	0.561585	SCAF11
21.6878	19.3472	20.8819	23.4828	22.876	22.7938			+	SSX2_IgG	5	571010000	1.54392	0.00181609	2.41191	1.40221	SCAF4
19.6164	20.2174	20.1501	20.5161	20.2188	20.3311					2	77649000	0.79769	0.629008	0.360728	0.298385	SEC61A1
20.1778	20.4539	20.947	23.91	23.9774	23.9256			+	SSX2_IgG	10	927760000	3.95066	0	3.41141	2.78282	SENP3
25.223	25.6689	26.1471	22.1576	22.3028	23.0098			+	SSX2_IgG	5	278520000	2.98056	0	-3.18962	-2.32006	SERPINA3
18.9391	19.5914	18.4171	21.7669	21.3686	21.3144			+	SSX2_IgG	3	170840000	2.60916	0	2.50076	1.82749	SF1
18.7343	19.7129	19.6214	22.8529	22.7735	22.7726			+	SSX2_IgG	8	422770000	3.41021	0	3.44345	2.62221	SF3A1
21.8313	19.1577	21.6493	22.1107	22.3303	22.4617					6	329930000	0.751946	0.0678705	1.42147	0.760758	SF3A3
20.6061	22.9328	20.2354	24.5224	23.8642	24.0085			+	SSX2_IgG	18	1019200000	1.52895	0.000670968	2.87362	1.53876	SF3B1
18.9221	20.273	20.2578	23.2588	23.1467	23.2555			+	SSX2_IgG	9	564730000	2.78789	0	3.40272	2.34784	SF3B2
23.0172	23.1073	23.1791	24.7975	24.5575	24.2123			+	SSX2_IgG	18	1232000000	2.89188	0.00479602	1.42129	1.20838	SF3B3
19.3032	19.9233	19.3813	20.8926	21.2859	21.0048			+	SSX2_IgG	2	129700000	2.58988	0.00446073	1.52516	1.24262	SF3B6
23.5261	22.5933	22.4805	23.9492	23.7387	23.9933					12	867630000	1.4055	0.0675507	1.0271	0.766188	SFPQ
18.7425	19.8693	19.2449	21.0892	21.7014	21.5925			+	SSX2_IgG	4	170860000	2.35102	0.000707483	2.17548	1.58042	SIPA1
19.3821	20.2656	20.0084	20.401	20.5115	20.6257					4	86337000	1.0915	0.30889	0.627368	0.493897	SKIV2L2
24.4626	19.9439	24.3006	24.4173	24.4503	24.5418					7	538990000	0.456658	0.150244	1.56741	0.631907	SLC25A5
25.2972	25.1125	25.4865	24.3784	24.295	24.7008					7	1293800000	2.16201	0.0850871	-0.840645	-0.722085	SLC25A6
20.8538	20.9284	19.7299	22.4696	23.7784	22.4702			+	SSX2_IgG	12	540080000	1.83398	0.00120755	2.40204	1.51688	SLTM
21.0039	20.3178	19.552	21.0117	21.0033	21.0266					14	122490000	0.795977	0.289649	0.722677	0.509143	SMARCA1
18.4532	18.8271	23.25	27.0946	27.1026	26.0237			+	SSX2_IgG	37	6939300000	1.84593	0	6.56355	2.54252	SMARCA4
22.3335	21.9779	22.1715	24.6654	24.754	24.7478			+	SSX2_IgG	26	1617300000	4.74795	0	2.56142	2.31444	SMARCA5
19.6681	20.2101	19.0124	21.6255	21.2471	21.0782			+	SSX2_IgG	3	152290000	1.93661	0.00430303	1.68673	1.22032	SMARCB1
18.6084	21.5232	19.9999	24.3391	24.3627	24.275			+	SSX2_IgG	15	1224900000	2.15127	0	4.28173	2.32435	SMARCC1
19.6484	19.8287	20.8491	21.6429	21.7327	21.9999			+	SSX2_IgG	12	210310000	1.90761	0.00482	1.68314	1.21185	SMARCC2
18.621	19.0906	19.1418	23.1253	23.3187	23.2559			+	SSX2_IgG	9	571690000	4.77869	0	4.28216	3.64362	SMARCD1
18.7212	18.8403	20.2917	21.8146	21.8852	21.7658			+	SSX2_IgG	6	212440000	2.13	0.000787879	2.53749	1.68491	SMARCE1
18.7572	20.0682	20.6324	21.0599	20.9809	21.1324					6	125990000	1.04413	0.0590483	1.23842	0.795305	SMC1A
22.4048	22.8309	17.9715	21.0139	21.8444	21.8445					5	151200000	0.114704	0.781132	0.498514	0.193362	SMC3
22.6363	23.0498	18.4805	21.5235	22.2203	21.3824					5	247710000	0.0758962	0.861381	0.319877	0.128884	SMU1
21.7128	22.4359	22.507	24.6266	24.6121	24.8186			+	SSX2_IgG	25	1536000000	3.14747	0	2.46718	1.95451	SNRNP200
18.0316	19.5801	20.9426	20.5765	20.6737	20.6845					2	94622000	0.599248	0.168	1.12684	0.611878	SNRNP40
20.1472	19.3935	18.6638	23.7784	23.2139	23.402			+	SSX2_IgG	9	672010000	3.04519	0	4.06328	2.78446	SNRNP70
19.2971	20.0379	19.8836	21.8607	22.0781	22.182			+	SSX2_IgG	4	251400000	3.14684	0	2.30076	1.84844	SNRPA1
24.2237	20.647	18.7575	23.821	23.9048	23.746			+	SSX2_IgG	3	907650000	0.748811	0.0185345	2.61456	1.00426	SNRPD1
19.4715	20.9658	18.9294	21.7633	21.9581	21.8944			+	SSX2_IgG	2	235260000	1.56657	0.00268783	2.08304	1.29254	SNRPD2
24.2753	24.492	25.1261	22.6384	22.647	22.9096			+	SSX2_IgG	5	796230000	2.66523	0.00193865	-1.8995	-1.49527	SNRPN
20.0585	19.1032	19.4091	21.0591	20.7852	20.7509			+	SSX2_IgG	4	118870000	1.96587	0.0152423	1.34147	1.03344	SNW1
18.9412	19.5349	19.634	21.812	22.142	22.0917			+	SSX2_IgG	4	246440000	3.41841	0	2.64519	2.13422	SRP14
20.2017	18.2459	19.8237	22.2296	21.8088	22.0692			+	SSX2_IgG	3	269760000	1.8886	0.000727273	2.61215	1.62106	SRP9
19.5408	19.9179	20.949	22.2176	22.4424	22.2425			+	SSX2_IgG	4	309690000	2.14752	0.00121519	2.16495	1.51731	SRRM1
18.6343	20.0847	19.0503	23.7996	23.6791	23.786			+	SSX2_IgG	13	817660000	3.31507	0	4.49843	3.13949	SRRM2
20.6764	18.7238	20.1403	22.9081	22.9392	22.829			+	SSX2_IgG	10	465140000	2.19195	0	3.04524	1.92325	SRRT
22.4795	19.105	20.2573	24.3762	24.2877	24.4595			+	SSX2_IgG	9	1316300000	1.71613	0	3.76055	1.88826	SRSF1
18.4542	19.3951	19.9706	23.2888	23.4483	23.4473			+	SSX2_IgG	4	646040000	3.12119	0	4.12151	2.85201	SRSF10
23.4548	22.476	22.6119	24.6809	24.5779	24.7863			+	SSX2_IgG	8	1185200000	2.37854	0.00180571	1.83415	1.398	SRSF3
19.0965	19.6552	18.6757	20.8237	20.985	20.9766			+	SSX2_IgG	4	115460000	2.46086	0.00179545	1.78597	1.3861	SRSF5
21.575	21.5075	21.1437	24.3277	24.9356	24.8407			+	SSX2_IgG	6	1535400000	3.84789	0	3.29261	2.67363	SRSF6
24.3655	24.334	23.8291	25.0533	25.1173	24.6985					9	1978400000	1.63995	0.139187	0.7802	0.640991	SRSF7
22.8307	20.5587	18.9367	23.5305	23.7154	23.586			+	SSX2_IgG	10	801520000	1.17899	0.00171739	2.83528	1.33071	SRSF9
19.2071	21.1187	20.8098	21.2647	20.8817	21.1835					3	131050000	0.533968	0.363481	0.731433	0.456055	SSRP1
19.563	20.2743	20.2065	24.5141	24.75	24.7841			+	SSX2_IgG	3	1560200000	4.37084	0	4.6681	3.75851	SSX2
19.0001	19.3077	20.1374	19.7516	19.7805	19.3982					2	47816000	0.169012	0.875424	0.161675	0.118773	STAG2
19.9086	19.285	20.2672	23.9759	23.8422	23.8701			+	SSX2_IgG	7	908750000	3.82864	0	4.07578	3.15995	STOML2
20.0971	19.9775	19.9769	23.2787	23.6809	23.5838			+	SSX2_IgG	11	697420000	4.97716	0	3.49725	3.10149	STRBP
19.1775	20.6788	20.1898	21.1999	21.4623	21.2184			+	SSX2_IgG	7	174180000	1.32902	0.0405783	1.27816	0.881432	SUGP2
18.1683	19.5513	18.1674	20.3895	20.5007	20.363			+	SSX2_IgG	2	81170000	1.74225	0.00432487	1.78876	1.22261	SUPT5H
19.066	20.1753	20.9901	21.4434	21.0188	21.2033					6	140870000	0.937504	0.0833825	1.14472	0.728665	SUPT6H
23.9671	24.9064	23.2031	26.8634	25.858	25.9152			+	SSX2_IgG	17	4671300000	1.68197	0.00176536	2.18669	1.3747	SYNCRIP
19.7069	19.0467	18.9138	21.8714	21.9457	22.2159			+	SSX2_IgG	4	244700000	3.32573	0	2.7885	2.20152	TAF15
19.6763	19.9698	20.6422	20.5382	20.3582	20.2788					4	79220000	0.426557	0.736622	0.295605	0.228088	TARDBP
20.2007	18.919	20.3301	21.9771	21.7691	21.8427			+	SSX2_IgG	7	220140000	1.9667	0.00182659	2.04639	1.40699	TCOF1
19.3947	19.7765	20.586	23.7167	23.9731	23.6829			+	SSX2_IgG	17	847870000	3.35904	0	3.87182	2.84071	TEX10
19.8099	19.5529	19.3412	21.4699	21.7464	21.8376			+	SSX2_IgG	4	195490000	3.57283	0	2.11657	1.80151	THOC1
19.3433	19.9095	19.8743	22.5854	22.6278	22.8064			+	SSX2_IgG	5	386620000	3.95946	0	2.96412	2.4799	THOC2
18.7002	20.0986	19.5807	22.0326	21.8763	22.1684			+	SSX2_IgG	7	246310000	2.45188	0	2.5659	1.81105	THOC5
19.1909	22.1666	19.6202	21.3266	21.4179	21.2989					5	153780000	0.477263	0.264412	1.02194	0.529684	THOC6
21.3801	21.5996	21.7089	23.6809	24.0212	23.9668			+	SSX2_IgG	12	955560000	4.0767	0	2.32678	2.03543	THRAP3
22.0472	22.4973	21.8307	20.6161	21.1507	21.1501			+	SSX2_IgG	3	137850000	1.9148	0.0354918	-1.15276	-0.911224	TIA1
18.4313	18.8264	20.4745	19.116	19.4376	19.2397					2	36650000	0.0106152	0.984449	0.020373	0.0124784	TLN1
22.2204	21.9524	21.8308	23.7204	23.6768	24.0454			+	SSX2_IgG	11	737570000	3.42334	0.000688742	1.813	1.55807	TMPO
19.4434	18.9131	21.5966	22.7758	22.7979	22.801			+	SSX2_IgG	10	418760000	1.57261	0.000684211	2.8072	1.54194	TOP2A
19.3908	19.5862	20.5639	20.5632	20.1489	20.7616					3	86139000	0.727899	0.359371	0.644252	0.458453	TP53BP1
23.2285	23.9093	20.4924	22.9416	22.7177	23.1408					9	431790000	0.13698	0.785773	0.389965	0.190108	TPM3
19.4317	19.6785	20.2896	21.3364	20.8893	21.4486			+	SSX2_IgG	4	142590000	2.01253	0.0124771	1.42483	1.09023	TPX2
18.4029	24.9626	25.2671	23.5635	23.5878	22.3056					6	405890000	0.0410363	0.905818	0.274769	0.083804	TRA2A
21.5058	19.3884	21.3144	23.0706	24.163	23.6308			+	SSX2_IgG	5	842810000	1.74384	0.000753623	2.88525	1.65241	TRA2B
18.7508	22.8533	19.1382	21.6735	21.8431	22.0543					7	248130000	0.54168	0.100232	1.60951	0.696053	TRIM28
18.3543	19.1118	19.4839	22.141	22.1218	22.0768			+	SSX2_IgG	9	267080000	3.14671	0	3.12982	2.34812	TRPS1
26.3971	27.1458	26.7197	26.6406	26.3426	26.3414					15	4765400000	0.584715	0.698432	-0.312679	-0.252449	TUBA1A
27.1461	27.7164	27.8671	25.8279	25.6338	25.9234			+	SSX2_IgG	16	4184500000	2.78572	0.00188095	-1.7815	-1.44188	TUBB
19.2202	20.2748	19.9961	19.4845	19.4707	19.284					13	43317000	0.577117	0.602916	-0.41732	-0.315656	TUBB2A
22.4089	19.9933	20.5481	23.5314	23.2244	23.5682			+	SSX2_IgG	14	690730000	1.53509	0.00184795	2.45788	1.4137	TUBB4B
24.6276	24.3739	19.8774	22.1625	21.8079	22.5241					4	199230000	0.196185	0.610652	-0.794811	-0.31088	TXN
17.9293	20.2633	19.3852	20.2523	20.171	20.3443					2	72209000	0.711702	0.150437	1.06327	0.631983	TXNDC12
18.3306	22.6135	20.2374	23.552	23.8499	23.426			+	SSX2_IgG	6	850520000	1.21342	0.00185882	3.21551	1.43218	U2AF1
24.3283	19.7432	24.4429	24.7335	24.7846	24.3564					9	1234600000	0.502741	0.097863	1.78666	0.699642	U2AF2
18.7467	19.4499	19.7082	22.7391	22.6545	22.7035			+	SSX2_IgG	8	393570000	3.52741	0	3.39745	2.63708	U2SURP
20.3667	20.5466	18.9728	21.1443	21.2673	21.2599			+	SSX2_IgG	3	141440000	1.18886	0.0482646	1.26181	0.841803	UBTF
19.7209	19.6065	20.3414	21.4274	21.483	21.6253			+	SSX2_IgG	5	173290000	2.6311	0.00168085	1.62228	1.31275	UHRF1
18.9229	20.4746	20.4565	20.0709	20.1672	20.3797					2	73236000	0.186131	0.814768	0.254589	0.167244	UQCR10
18.9219	20.7384	20.6794	20.8307	21.3261	21.05					3	128920000	0.712389	0.189156	0.955743	0.592563	USF2
19.6084	22.5818	22.7336	21.5564	21.2562	21.5769					3	105810000	0.060389	0.901701	-0.178125	-0.0880655	VDAC2
30.7954	30.3934	29.9446	32.1038	32.306	32.3299			+	SSX2_IgG	60	238440000000	2.72779	0.00192683	1.8688	1.48793	VIM
19.7827	19.0153	19.9366	24.8452	24.9627	24.9488			+	SSX2_IgG	10	1825000000	4.30706	0	5.34072	4.14868	WDR18
17.8972	20.6216	19.4503	20.7397	20.6044	20.5817					4	94317000	0.768031	0.0790563	1.31889	0.736565	WDR33
18.764	19.4945	19.692	20.1495	20.4277	20.3391					3	75089000	1.54953	0.0676245	0.988567	0.764013	WDR82
22.2449	22.8972	23.008	26.9404	27.1995	27.0825			+	SSX2_IgG	26	7817900000	4.19951	0	4.35745	3.48719	XRCC5
22.3838	23.3406	23.3247	27.2307	27.0708	26.9794			+	SSX2_IgG	27	8095300000	3.63536	0	4.07727	3.0778	XRCC6
19.7196	19.8876	19.8907	23.2236	23.4126	23.3192			+	SSX2_IgG	9	605830000	5.81164	0	3.48587	3.23195	XRN2
21.8192	18.9809	20.0834	24.0537	23.2065	23.4372			+	SSX2_IgG	5	792600000	1.71379	0	3.27131	1.75503	YBX1
19.4553	19.121	19.8532	21.217	21.2134	21.3486			+	SSX2_IgG	6	144950000	2.92805	0.00190361	1.78317	1.46609	YLPM1
19.5322	19.2682	20.1512	20.5968	20.7683	20.8238			+	SSX2_IgG	3	100430000	1.78875	0.0472126	1.0791	0.849383	YTHDC1
19.2197	19.7091	20.4906	19.533	19.4642	20.0343					2	48875000	0.114062	0.89998	-0.129295	-0.0916071	ZBTB10
18.7605	18.9476	19.6511	20.0405	19.9215	20.2504					2	64785000	1.52634	0.079617	0.951017	0.738567	ZC3H11A
19.6144	19.6528	19.052	20.3865	20.2602	20.2216					2	74034000	1.87679	0.0930483	0.849711	0.707811	ZC3H18
18.9234	19.7334	20.4081	20.2258	20.2062	20.37					3	72808000	0.599499	0.457605	0.57901	0.404255	ZFHX4
20.2632	20.1239	20.096	23.2605	24.1182	24.2815			+	SSX2_IgG	16	946630000	3.50279	0	3.72576	2.82078	ZFR
18.7783	19.446	19.9884	20.1316	19.857	19.8567					2	58508000	0.684202	0.465751	0.544211	0.399643	ZMYM4
21.5149	18.8383	20.1155	23.5645	23.6393	23.4568			+	SSX2_IgG	9	746470000	1.92707	0	3.39732	1.91425	ZNF326
18.2882	20.3707	19.6038	20.5969	20.2624	20.5637					3	84185000	0.787521	0.129785	1.05346	0.651361	ZNF512
19.1103	18.8251	20.2453	21.5512	21.811	21.4959			+	SSX2_IgG	6	186910000	2.12781	0.000679739	2.22577	1.54088	ZNF638
