# Supplementary material for: Targeted degradation of BRD9 reverses oncogenic gene expression in synovial sarcoma
Source: eLife. 2018 Nov 15;7:e41305. doi: 10.7554/eLife.41305 (PMC6277197; doi:10.7554/eLife.41305)
Supplement: Figure 2—source data 3. [file elife-41305-fig2-data3.xlsx]

## Sheet: Sheet1
HSSYII cells			SYO1 cells
sgRNA-ID	Fold change sgRNA abundance		sgRNA-ID	Fold change sgRNA abundance
sgRNA-2	8.49509		sgRNA-2	2.62853
sgRNA-1	0.687245		sgRNA-1	0.631451
sgRNA-7	3.08303		sgRNA-7	2.48068
sgRNA-6	4.62653		sgRNA-6	3.68086
sgRNA-9	5.88388		sgRNA-9	2.99588
sgRNA-4	3.93214		sgRNA-4	4.93888
sgRNA-3	3.51586		sgRNA-3	2.98297
sgRNA-11	1.8371		sgRNA-11	7.15344
sgRNA-5	2.36382		sgRNA-5	1.78031
sgRNA-10	4.75236		sgRNA-10	5.68496
sgRNA-8	2.22496		sgRNA-8	1.75228
sgRNA-12	5.96881		sgRNA-12	4.79029
sgRNA-25	3.84974		sgRNA-25	7.47532
sgRNA-22	7.85724		sgRNA-22	5.5664
sgRNA-20	4.85849		sgRNA-20	2.68138
sgRNA-23	5.59851		sgRNA-23	2.98231
sgRNA-24	4.63578		sgRNA-24	2.95117
sgRNA18	4.22473		sgRNA18	3.81746
sgRNA-17	1.17578		sgRNA-17	1.14625
sgRNA-15	3.53505		sgRNA-15	2.57961
sgRNA-13	1.29511		sgRNA-13	1.0173
sgRNA-21	3.63277		sgRNA-21	2.6307
sgRNA-16	4.12772		sgRNA-16	2.57102
sgRNA-19	3.6424		sgRNA-19	4.31603
sgRNA-14	11.4279		sgRNA-14	3.46667
sgRNA-29	1.22472		sgRNA-29	1.10117
sgRNA-28	9.9024		sgRNA-28	8.32799
sgRNA-26	7.8675		sgRNA-26	11.1056
sgRNA-27	13.6349		sgRNA-27	12.9156
sgRNA-30	2.49217		sgRNA-30	3.42121
sgRNA-31	1.42995		sgRNA-31	1.15276
sgRNA-32	18.7618		sgRNA-32	20.1447
sgRNA-34	4.50689		sgRNA-34	6.32804
sgRNA-35	12.6613		sgRNA-35	11.1283
sgRNA-33	6.32542		sgRNA-33	7.41768
sgRNA-41	7.30317		sgRNA-41	6.28793
sgRNA-36	3.35784		sgRNA-36	3.12169
sgRNA-38	12.8279		sgRNA-38	12.209
sgRNA-39	20.8188		sgRNA-39	17.4893
sgRNA-40	7.48315		sgRNA-40	7.88224
sgRNA-37	26.9538		sgRNA-37	19.13
sgRNA-45	1.99141		sgRNA-45	1.4632
sgRNA-46	3.23263		sgRNA-46	3.05225
sgRNA-44	3.67074		sgRNA-44	1.98873
sgRNA-43	3.67074		sgRNA-43	1.98873
sgRNA-42	1.03497		sgRNA-42	1.12185
sgRNA-51	3.18302		sgRNA-51	3.79349
sgRNA-47	4.53199		sgRNA-47	6.27429
sgRNA-52	4.84304		sgRNA-52	4.26795
sgRNA-48	1.32119		sgRNA-48	1.54587
sgRNA-54	12.7996		sgRNA-54	13.1143
sgRNA-50	3.18296		sgRNA-50	2.40428
sgRNA-49	10.1256		sgRNA-49	4.04866
sgRNA-53	2.78305		sgRNA-53	2.83272
sgRNA-60	16.1472		sgRNA-60	17.5533
sgRNA-59	2.13991		sgRNA-59	3.74043
sgRNA-56	4.95249		sgRNA-56	4.74724
sgRNA-58	13.2631		sgRNA-58	14.9464
sgRNA-57	9.35499		sgRNA-57	16.884
sgRNA-55	6.64781		sgRNA-55	13.1352
sgRNA-61	3.52363		sgRNA-61	1.91517
sgRNA-62	5.56654		sgRNA-62	1.61182
sgRNA-63	2.36437		sgRNA-63	2.18419
sgRNA-65	2.33074		sgRNA-65	2.35428
sgRNA-66	1.88311		sgRNA-66	1.94189
sgRNA-67	2.81341		sgRNA-67	2.07481
sgRNA-64	1.87738		sgRNA-64	1.50545
sgRNA-74	2.45622		sgRNA-74	1.80556
sgRNA-76	1.46831		sgRNA-76	1.29924
sgRNA-82	1.61146		sgRNA-82	1.34218
sgRNA-77	1.25312		sgRNA-77	1.97869
sgRNA-72	1.82486		sgRNA-72	1.43011
sgRNA-81	1.87948		sgRNA-81	1.13965
sgRNA-75	1.1705		sgRNA-75	1.17968
sgRNA-78	3.50736		sgRNA-78	1.65967
sgRNA-80	1.91407		sgRNA-80	1.17327
sgRNA-70	1.50559		sgRNA-70	1.21571
sgRNA-68	1.05524		sgRNA-68	1.23469
sgRNA-69	1.59718		sgRNA-69	1.19018
sgRNA-79	2.51912		sgRNA-79	1.83565
sgRNA-73	1.64878		sgRNA-73	1.69349
sgRNA-71	1.87865		sgRNA-71	1.34281
sgRNA-86	1.69414		sgRNA-86	1.15153
sgRNA-84	2.50538		sgRNA-84	1.83576
sgRNA-90	2.61667		sgRNA-90	1.73611
sgRNA-89	3.16181		sgRNA-89	2.20863
sgRNA-85	5.63859		sgRNA-85	3.92402
sgRNA-87	2.34003		sgRNA-87	1.63704
sgRNA-83	2.56455		sgRNA-83	2.5679
sgRNA-88	1.41488		sgRNA-88	1.26237
