# Supplementary material for: Targeted degradation of BRD9 reverses oncogenic gene expression in synovial sarcoma
Source: eLife. 2018 Nov 15;7:e41305. doi: 10.7554/eLife.41305 (PMC6277197; doi:10.7554/eLife.41305)
Supplement: Figure 2—source data 4. [file elife-41305-fig2-data4.xlsx]

## Sheet: Figure 2-source data 4
Time	Relative GFP+ve cells	StDev	n	Relative GFP+ve cells	StDev	n	Relative GFP+ve cells	StDev	n	Relative GFP+ve cells	StDev	n	Relative GFP+ve cells	StDev	n	Relative GFP+ve cells	StDev	n
Day 3	100	0	3	100	0	3	100	0	3	100	0	3	100	0	3	100	0	3
Day 6	98.511	3.37263	3	77.4759	1.06308	3	98.1785	3.42787	3	96.2832	1.70824	3	101.188	2.91688	3	90.652	1.37858	3
Day 9	95.5537	2.28479	3	55.1816	7.19813	3	97.7058	2.04494	3	94.0644	2.03895	3	97.3285	1.93993	3	62.8838	4.76091	3
Da 12	97.0023	1.75145	3	31.4114	7.4017	3	98.5175	1.46131	3	86.4128	1.27836	3	97.1717	2.68176	3	48.4576	1.84867	3
Day 15	96.4569	1.50982	3	16.3901	1.98018	3	97.5838	4.3146	3	85.7023	3.11603	3	95.3806	5.54422	3	33.0899	4.11587	3
Day 18	94.8317	0.726193	3	9.34176	1.3603	3	97.5869	6.6342	3	82.2757	3.40174	3	94.0938	6.41257	3	19.8672	2.39534	3
	sgROSA26			sg-58			sgROSA26			sg-58			sgROSA26			sg-58
	Vector						BRD9-FL						BRD9 D311-345
*	Relative GFP+ve cells reflects the percentage of GFP positive cells over time in cells infected with each of the indicated control (ROSA26) or BRD9 311-345 targeting (sg-58) sgRNAs in each respective rescue background - Vector, BRD9-FL, BRD9 D311-345
*	StDev reflects the standard deviation of values in 3 biological replicate experiments
