# Supplementary material for: Targeted degradation of BRD9 reverses oncogenic gene expression in synovial sarcoma
Source: eLife. 2018 Nov 15;7:e41305. doi: 10.7554/eLife.41305 (PMC6277197; doi:10.7554/eLife.41305)
Supplement: Figure 4—source data 1. [file elife-41305-fig4-data1.xlsx]

## Sheet: Figure 4-soruce data 1
	ChIP enrichments				StDev
Promoter region	Vector cells	BRD9-FL	BRD9 D311-345	BRD9 Dbromo	Vector cells	BRD9-FL	BRD9 D311-345	BRD9 Dbromo	n
SSX1	0.00224647	0.00201119	0.00196844	0.00242503	0.000479471	0.000378305	0.000144243	0.000341581	3
MYC	0.00276793	0.0169367	0.0072419	0.0069275	0.00046168	0.00160571	0.000370443	0.000863277	3
PAX3	0.00182172	0.0151059	0.0069531	0.00839173	0.00068968	0.00294429	0.000917552	0.000820565	3
GATA3	0.00228238	0.0148283	0.00563792	0.00648835	0.000354745	0.00284555	0.000423408	0.00208042	3
FZD10	0.00242326	0.0116273	0.00508902	0.00541936	0.000817351	0.000866723	0.000627839	0.000910128	3
