# Supplementary material for: Targeted degradation of BRD9 reverses oncogenic gene expression in synovial sarcoma
Source: eLife. 2018 Nov 15;7:e41305. doi: 10.7554/eLife.41305 (PMC6277197; doi:10.7554/eLife.41305)
Supplement: Figure 5—figure supplement 1—source data 1. [file elife-41305-fig5-figsupp1-data1.xlsx]

## Sheet: Figure5-figure supplement 1-sd1
	DMSO			dBRD9-13 100nM					DMSO			dBRD9-A					DMSO			dBRD9-A
	Rep-1	Rep-2	Rep-3	Rep-1	Rep-2	Rep-3			Rep-1	Rep-2	Rep-3	Rep-1	Rep-2	Rep-3			Rep-1	Rep-2	Rep-3	Rep-1	Rep-2	Rep-3
Day	Cell counts	Cell counts	Cell counts	Cell counts	Cell counts	Cell counts		Day	Cell counts	Cell counts	Cell counts	Cell counts	Cell counts	Cell counts		Day	Cell counts	Cell counts	Cell counts	Cell counts	Cell counts	Cell counts
0	150000	150000	150000	150000	150000	150000		0	150000	150000	150000	150000	150000	150000		0	150000	150000	150000	150000	150000	150000
3	594000	501000	554000	671000	613000	759000		3	625000	495000	455000	436000	612000	700000		3	501000	372000	946000	647000	519000	418000
6	3197000	3761000	3374000	2330000	2032000	1710000		6	2994000	3055000	3055000	2196000	2472000	2042000		6	3321000	2417000	2750000	2657000	3489000	3548000
9	6394000	7522000	6748000	4660000	4064000	3420000		9	5988000	6110000	6110000	4392000	5044000	4284000		9	6642000	4834000	5500000	5314000	6978000	7096000
	Vector cells								BRD9-WT								BRD9-BD7
*	Days indicate time following initiation of treatment
*	Numbers indicate cumulative cell numbers over experimental time course
