# Supplementary material for: Targeted degradation of BRD9 reverses oncogenic gene expression in synovial sarcoma
Source: eLife. 2018 Nov 15;7:e41305. doi: 10.7554/eLife.41305 (PMC6277197; doi:10.7554/eLife.41305)
Supplement: Figure 5—figure supplement 1—source data 2. [file elife-41305-fig5-figsupp1-data2.xlsx]

## Sheet: Figure5-figure supplement 1-sd2
	Vehicle treated mice					dBRD9-A treated mice
Day	Mouse-1	Mouse-2	Mouse-3	Mouse-4	Mouse-5	Mouse-1	Mouse-2	Mouse-3	Mouse-4	Mouse-5
1	21.6	19.7	19.7	19.5	20	19.5	21.4	22.3	20	21.6
3	21.5	20.1	20.2	19.3	19.4	19.8	21.9	22.5	20.6	21.6
6	21.8	19.7	19.8	20	20	19.5	22	22.6	20.5	22
9	21.6	19.7	19.7	19.6	20.2	19.6	21.9	22.8	20.6	22.1
12	21.7	19.6	19.1	19.6	20.1	18.1	21.2	22.5	20.6	21.8
15	21.4	19.8	18.9	19.8	20.5	18.5	21.6	22.5	20.6	21.7
18	21.2	20	19.8	19.9	20.2	19.3	21.4	22.2	20.8	22.1
21	21.1	19.5	19	19.6	19.7	18.6	21.7	22.2	20.6	21.7
24	21.4	19.8	18.8	19.9	20.2	18.7	20.9	20	18.3	19.4
*	Days indicate time following initiation of treatments
*	Numbers indicate mouse weight, measured in grams
