# Supplementary material for: Targeted degradation of BRD9 reverses oncogenic gene expression in synovial sarcoma
Source: eLife. 2018 Nov 15;7:e41305. doi: 10.7554/eLife.41305 (PMC6277197; doi:10.7554/eLife.41305)
Supplement: Figure 5—figure supplement 1—source data 3. [file elife-41305-fig5-figsupp1-data3.xlsx]

## Sheet: Figure5-figure supplement 1-sd3
	White blood cells				Neutrophils
Mouse	Vehicle	dBRD9-A		Mouse	Vehicle	dBRD9-A
Mouse-1	7.26	5.5		Mouse-1	1.67	2.47
Mouse-2	7.88	4.68		Mouse-2	3.69	3.79
Mouse-3	7.2	5.68		Mouse-3	2.46	2.66
Mouse-4	7.12	4.3		Mouse-4	2.15	3.21
Mouse-5	6.2	5.3		Mouse-5	2.77	3.86
	Cell number/ul of blood x1000				Cell number/ul of blood x1000
	Lymphocytes				Monocytes
Mouse	Vehicle	dBRD9-A		Mouse	Vehicle	dBRD9-A
Mouse-1	4.57	2.39		Mouse-1	0.72	0.13
Mouse-2	3.12	0.72		Mouse-2	0.61	0.11
Mouse-3	4.39	2.91		Mouse-3	0.23	0.09
Mouse-4	4.65	0.97		Mouse-4	0.29	0.09
Mouse-5	3.21	1.29		Mouse-5	0.19	0.12
	Cell number/ul of blood x1000				Cell number/ul of blood x1000
	Hemoglobin				Platelets
Mouse	Vehicle	dBRD9-A		Mouse	Vehicle	dBRD9-A
Mouse-1	14.2	15.2		Mouse-1	603	600
Mouse-2	15.1	15.9		Mouse-2	665	904
Mouse-3	15.7	15.8		Mouse-3	601	755
Mouse-4	15	16.9		Mouse-4	796	845
Mouse-5	15.3	15.6		Mouse-5	774	795
	gram/dl of blood				Platelet number/ul of blood x1000
