# Supplementary material for: Targeted degradation of BRD9 reverses oncogenic gene expression in synovial sarcoma
Source: eLife. 2018 Nov 15;7:e41305. doi: 10.7554/eLife.41305 (PMC6277197; doi:10.7554/eLife.41305)
Supplement: Figure 5—source data 1. [file elife-41305-fig5-data1.xlsx]

## Sheet: Figure 5-source data 1
	HSSYII cells					SYO1 cells
	Annexin V positivity					Annexin V positivity
Time	Relative cell number	StDev	n		Time	Relative cell number	StDev	n
-	1	0	3		-	1	0.03	3
Day3	2.04	0.29	3		Day3	1.81	0.04	3
Day6	3.13	0.11	3		Day6	2.18	0.13	3
Day9	3.34	0.35	3		Day9	3.64	0.08	3
