# Supplementary material for: Targeted degradation of BRD9 reverses oncogenic gene expression in synovial sarcoma
Source: eLife. 2018 Nov 15;7:e41305. doi: 10.7554/eLife.41305 (PMC6277197; doi:10.7554/eLife.41305)
Supplement: Figure 5—source data 2. [file elife-41305-fig5-data2.xlsx]

## Sheet: Figure 5-source data 2
	HSSYII cells							SYO1 cells
	S phase cells		G1/0 phase cells					S phase cells		G1/0 phase cells
Time	Relative cell number	StDev	Relative cell number	StDev	n		Time	Relative cell number	StDev	Relative cell number	StDev	n
-	1	0.04	1	0.03	3		-	1	0.03	1	0.02	3
Day3	0.81	0.01	1.14	0.03	3		Day3	0.68	0.12	1.29	0.06	3
Day6	0.63	0.02	1.23	0.01	3		Day6	0.78	0.07	1.12	0.04	3
Day9	0.63	0.02	1.27	0.01	3		Day9	0.52	0.03	1.29	0	3
