# Supplementary material for: Targeted degradation of BRD9 reverses oncogenic gene expression in synovial sarcoma
Source: eLife. 2018 Nov 15;7:e41305. doi: 10.7554/eLife.41305 (PMC6277197; doi:10.7554/eLife.41305)
Supplement: Figure 5—source data 3. [file elife-41305-fig5-data3.xlsx]

## Sheet: Figure 5-source data 3
Name	Description	baseMean	log2FoldChange	lfcSE	stat	pvalue	padj
NM_000014	A2M	0.715567	-0.0116259	0.0682273	-0.1704	0.864696	NA
NM_000015	NAT2	0	NA	NA	NA	NA	NA
NM_000017	ACADS	195.623	-0.100748	0.13152	-0.766028	0.44366	0.547673
NM_000019	ACAT1	1814.66	-0.325339	0.0991592	-3.28097	0.0010345	0.00562948
NM_000020	ACVRL1	0	NA	NA	NA	NA	NA
NM_000021	PSEN1	1238.46	-0.299491	0.0990996	-3.02212	0.00251007	0.0107203
NM_000022	ADA	462.967	-0.617464	0.106052	-5.8223	5.80444e-09	6.27649e-07
NM_000023	SGCA	5.81742	-0.0541326	0.158662	-0.341181	0.732967	NA
NM_000024	ADRB2	0	NA	NA	NA	NA	NA
NM_000025	ADRB3	0.541651	0.0701852	0.059471	1.18016	0.237937	NA
NM_000027	AGA	159.862	0.0311473	0.136497	0.22819	0.819498	0.866693
NM_000029	AGT	0	NA	NA	NA	NA	NA
NM_000030	AGXT	0	NA	NA	NA	NA	NA
NM_000031	ALAD	656.006	-0.25225	0.10417	-2.42152	0.0154555	0.0412898
NM_000032	ALAS2	1.63049	-0.0285821	0.0995144	-0.287215	0.773947	NA
NM_000033	ABCD1	185.958	-0.502067	0.131062	-3.83075	0.000127752	0.00121637
NM_000035	ALDOB	0.34542	-0.00643313	0.0467701	-0.137548	0.890598	NA
NM_000036	AMPD1	0.200416	-0.0258074	0.0347035	-0.743654	0.457086	NA
NM_000038	APC	1891.92	-0.29255	0.106524	-2.74633	0.00602667	0.0205285
NM_000039	APOA1	5.62748	-0.165387	0.153205	-1.07952	0.280357	NA
NM_000040	APOC3	0.201177	-0.0258809	0.0347514	-0.744745	0.456426	NA
NM_000041	APOE	1003.93	-0.230941	0.0986196	-2.34174	0.0191943	0.0485205
NM_000042	APOH	0	NA	NA	NA	NA	NA
NM_000044	AR	1.64278	0.120242	0.100603	1.19521	0.232003	NA
NM_000045	ARG1	0.201177	-0.0258809	0.0347514	-0.744745	0.456426	NA
NM_000046	ARSB	678.809	-0.205746	0.104371	-1.9713	0.048689	0.0976099
NM_000047	ARSE	0.201177	-0.0258809	0.0347514	-0.744745	0.456426	NA
NM_000049	ASPA	0	NA	NA	NA	NA	NA
NM_000050	ASS1	333.09	0.249861	0.114541	2.18141	0.0291532	0.0662323
NM_000051	ATM	2930.03	-0.562174	0.107406	-5.23409	1.658e-07	8.40156e-06
NM_000052	ATP7A	785.829	-0.474333	0.106122	-4.4697	7.83297e-06	0.00015098
NM_000053	ATP7B	288.559	-0.667767	0.128418	-5.19996	1.99332e-07	9.66477e-06
NM_000054	AVPR2	0.332885	-0.007319	0.0461538	-0.158578	0.874001	NA
NM_000055	BCHE	0.673107	0.0347329	0.0650987	0.533543	0.593658	NA
NM_000059	BRCA2	2128.14	-0.119927	0.101279	-1.18413	0.236362	0.332715
NM_000061	BTK	2.04967	-0.0284474	0.10763	-0.264306	0.791544	NA
NM_000062	SERPING1	160.121	-0.211012	0.133419	-1.58157	0.113747	0.188123
NM_000063	C2	0	NA	NA	NA	NA	NA
NM_000064	C3	16.0511	-0.00390374	0.188513	-0.0207081	0.983479	0.988183
NM_000065	C6	0	NA	NA	NA	NA	NA
NM_000066	C8B	0	NA	NA	NA	NA	NA
NM_000067	CA2	1034.48	0.0220866	0.10272	0.215016	0.829755	0.874046
NM_000068	CACNA1A	0.51439	0.0151811	0.0579319	0.262052	0.793282	NA
NM_000069	CACNA1S	0.165025	-0.0221846	0.0322425	-0.688056	0.491417	NA
NM_000072	CD36	0.276713	0.0375432	0.0439615	0.854002	0.393104	NA
NM_000073	CD3G	0.333647	-0.00737081	0.0461889	-0.15958	0.873212	NA
NM_000074	CD40LG	0	NA	NA	NA	NA	NA
NM_000075	CDK4	5615.92	-0.199077	0.0852048	-2.33646	0.0194675	0.0490494
NM_000077	CDKN2A	32.6612	-0.375593	0.185793	-2.02157	0.0432208	0.0891583
NM_000078	CETP	0.144243	0.0178801	0.0304507	0.587182	0.557081	NA
NM_000079	CHRNA1	0	NA	NA	NA	NA	NA
NM_000080	CHRNE	93.7307	-0.18451	0.154974	-1.19058	0.233817	0.32997
NM_000081	LYST	261.875	-0.291983	0.13826	-2.11185	0.0346997	0.0755695
NM_000083	CLCN1	0.16973	0.0203348	0.0324771	0.626128	0.531231	NA
NM_000085	CLCNKB	0.741054	-0.00901054	0.0666132	-0.135267	0.892401	NA
NM_000087	CNGA1	0.330051	-0.0430516	0.0447027	-0.963064	0.335515	NA
NM_000088	COL1A1	122.567	0.376662	0.146366	2.57343	0.0100695	0.0299849
NM_000089	COL1A2	0	NA	NA	NA	NA	NA
NM_000090	COL3A1	209.746	-0.336361	0.12747	-2.63875	0.00832131	0.0259988
NM_000091	COL4A3	2.3417	-0.0752029	0.114632	-0.65604	0.511799	NA
NM_000092	COL4A4	0.805577	0.0520038	0.0708789	0.7337	0.463132	NA
NM_000093	COL5A1	354.288	0.0362229	0.115822	0.312745	0.754474	0.815669
NM_000094	COL7A1	653.941	-0.307168	0.111638	-2.75145	0.00593316	0.0203194
NM_000095	COMP	21.9614	0.0484409	0.189784	0.255243	0.798535	0.850056
NM_000096	CP	74.3934	-0.454922	0.163682	-2.77931	0.0054474	0.019057
NM_000097	CPOX	1068.49	-0.2792	0.109256	-2.55546	0.0106047	0.0311443
NM_000098	CPT2	366.569	0.0270616	0.120799	0.224021	0.822741	0.869012
NM_000099	CST3	411.63	-0.180875	0.114235	-1.58336	0.11334	0.187647
NM_000100	CSTB	1516.11	-0.214707	0.0961296	-2.23352	0.0255148	0.0599414
NM_000101	CYBA	1849.62	-0.14709	0.0863373	-1.70367	0.0884434	0.15464
NM_000102	CYP17A1	1.17289	0.00925481	0.0835252	0.110803	0.911773	NA
NM_000103	CYP19A1	0.16973	0.0203348	0.0324771	0.626128	0.531231	NA
NM_000104	CYP1B1	4495.95	0.218325	0.0967224	2.25724	0.0239933	0.0572991
NM_000108	DLD	5369.05	-0.135552	0.0966891	-1.40194	0.160933	0.24717
NM_000109	DMD	6.1475	0.107808	0.159258	0.67694	0.498444	NA
NM_000110	DPYD	1035.19	-0.417372	0.099428	-4.19773	2.69607e-05	0.000377715
NM_000111	SLC26A3	0.488902	0.0120143	0.0545359	0.220302	0.825636	NA
NM_000112	SLC26A2	891.871	-0.182588	0.111059	-1.64406	0.100163	0.170059
NM_000113	TOR1A	1260.71	-0.15759	0.0959665	-1.64213	0.100562	0.170591
NM_000114	EDN3	0	NA	NA	NA	NA	NA
NM_000115	EDNRB	0	NA	NA	NA	NA	NA
NM_000117	EMD	2159.83	-0.247923	0.085949	-2.88454	0.00391986	0.0149977
NM_000119	EPB42	0.165025	-0.0221846	0.0322425	-0.688056	0.491417	NA
NM_000122	ERCC3	1795.3	-0.220314	0.0899745	-2.44863	0.0143401	0.0389863
NM_000123	ERCC5	1112.37	-0.223104	0.102763	-2.17106	0.0299265	0.0674593
NM_000124	ERCC6	450.099	-0.157257	0.11313	-1.39006	0.16451	0.251265
NM_000125	ESR1	0.43273	0.0504742	0.0506106	0.997306	0.318616	NA
NM_000126	ETFA	5808.7	-0.175578	0.0932047	-1.88379	0.0595931	0.1139
NM_000127	EXT1	2243.41	-0.147113	0.0897144	-1.63979	0.101049	0.171214
NM_000128	F11	0.165025	-0.0221846	0.0322425	-0.688056	0.491417	NA
NM_000129	F13A1	0.200416	-0.0258074	0.0347035	-0.743654	0.457086	NA
NM_000130	F5	0.144243	0.0178801	0.0304507	0.587182	0.557081	NA
NM_000131	F7	3.29139	-0.041631	0.130738	-0.318429	0.750159	NA
NM_000133	F9	0	NA	NA	NA	NA	NA
NM_000134	FABP2	0	NA	NA	NA	NA	NA
NM_000136	FANCC	1599.56	-0.170709	0.0919336	-1.85687	0.06333	0.119388
NM_000137	FAH	1074.7	-0.306753	0.097161	-3.15716	0.00159312	0.00771701
NM_000138	FBN1	481.194	-0.359346	0.113763	-3.15873	0.00158458	0.00768686
NM_000139	MS4A2	0	NA	NA	NA	NA	NA
NM_000140	FECH	2971.26	-0.154227	0.091469	-1.68611	0.0917737	0.159336
NM_000143	FH	4921.18	-0.172692	0.092723	-1.86245	0.0625395	0.118293
NM_000144	FXN	1047.67	-0.18854	0.10434	-1.80697	0.0707662	0.130027
NM_000145	FSHR	0	NA	NA	NA	NA	NA
NM_000146	FTL	22877.8	-0.0840497	0.0848652	-0.990391	0.321983	0.426567
NM_000147	FUCA1	109.044	-0.0311693	0.149001	-0.209189	0.834301	0.877043
NM_000148	FUT1	1.78249	0.0401903	0.104839	0.383353	0.701458	NA
NM_000149	FUT3	0.370908	-0.0046177	0.0479474	-0.0963076	0.923276	NA
NM_000150	FUT6	0	NA	NA	NA	NA	NA
NM_000151	G6PC	0.132469	0.0167661	0.0294891	0.568552	0.56966	NA
NM_000153	GALC	1163.24	-0.16304	0.0980013	-1.66366	0.0961813	0.165061
NM_000154	GALK1	656.32	-0.33699	0.101788	-3.31071	0.000930601	0.00520624
NM_000155	GALT	314.653	-0.188266	0.116685	-1.61346	0.106645	0.17879
NM_000156	GAMT	649.18	-0.370768	0.0996524	-3.72062	0.000198736	0.00171031
NM_000158	GBE1	544.19	-0.169699	0.120058	-1.41348	0.157516	0.243007
NM_000160	GCGR	83.593	0.151408	0.162965	0.929086	0.352844	0.457697
NM_000162	GCK	0	NA	NA	NA	NA	NA
NM_000163	GHR	2.61586	-0.0147881	0.115455	-0.128086	0.898081	NA
NM_000164	GIPR	10.7907	-0.081712	0.179217	-0.455938	0.648434	0.730261
NM_000165	GJA1	0.56738	-0.0770718	0.0591623	-1.30272	0.192671	NA
NM_000166	GJB1	0	NA	NA	NA	NA	NA
NM_000167	GK	212.38	-0.276915	0.131915	-2.0992	0.0357996	0.077373
NM_000168	GLI3	1244.44	-0.277697	0.10576	-2.62572	0.00864654	0.0267438
NM_000169	GLA	713.493	-0.247269	0.0995301	-2.48437	0.0129781	0.0362252
NM_000170	GLDC	1.20717	0.00174966	0.0848568	0.020619	0.98355	NA
NM_000171	GLRA1	0	NA	NA	NA	NA	NA
NM_000172	GNAT1	0.631141	-0.0120136	0.0635082	-0.189166	0.849962	NA
NM_000173	GP1BA	60.218	-0.0359202	0.170072	-0.211206	0.832727	0.875911
NM_000174	GP9	0.144243	0.0178801	0.0304507	0.587182	0.557081	NA
NM_000178	GSS	1782.77	-0.157782	0.0954472	-1.65308	0.0983138	0.167809
NM_000180	GUCY2D	0	NA	NA	NA	NA	NA
NM_000182	HADHA	11117.3	-0.269928	0.0907554	-2.97424	0.00293718	0.0120971
NM_000184	HBG2	0.165025	-0.0221846	0.0322425	-0.688056	0.491417	NA
NM_000185	SERPIND1	0.201177	-0.0258809	0.0347514	-0.744745	0.456426	NA
NM_000186	CFH	0.699849	-0.0571266	0.0662823	-0.861867	0.38876	NA
NM_000187	HGD	1.66775	-0.0268848	0.10178	-0.264145	0.791668	NA
NM_000189	HK2	3701.86	-0.200024	0.0966922	-2.06866	0.0385777	0.0818332
NM_000192	TBX5	0	NA	NA	NA	NA	NA
NM_000193	SHH	57.4619	0.305349	0.173255	1.76243	0.0779975	0.140679
NM_000194	HPRT1	2985.42	-0.256298	0.0920691	-2.78376	0.00537329	0.0188374
NM_000195	HPS1	797.549	-0.170642	0.0938006	-1.8192	0.068881	0.127324
NM_000196	HSD11B2	102.382	-0.401051	0.149531	-2.68205	0.00731716	0.0236447
NM_000197	HSD17B3	0.132469	0.0167661	0.0294891	0.568552	0.56966	NA
NM_000198	HSD3B2	0	NA	NA	NA	NA	NA
NM_000199	SGSH	744.429	0.0685469	0.0982305	0.697816	0.485292	0.587067
NM_000200	HTN3	0	NA	NA	NA	NA	NA
NM_000201	ICAM1	635.501	-0.503608	0.0995322	-5.05975	4.19805e-07	1.68017e-05
NM_000202	IDS	2015.52	-0.322706	0.102168	-3.15859	0.00158534	0.00768804
NM_000203	IDUA	173.374	-0.253663	0.133215	-1.90415	0.05689	0.109859
NM_000204	CFI	0.144243	0.0178801	0.0304507	0.587182	0.557081	NA
NM_000206	IL2RG	0.344659	-0.00638157	0.046736	-0.136545	0.89139	NA
NM_000207	INS	0	NA	NA	NA	NA	NA
NM_000208	INSR	2226.49	-0.36272	0.0898525	-4.03684	5.41771e-05	0.000637942
NM_000209	PDX1	1.37102	-0.0198199	0.0881352	-0.22488	0.822073	NA
NM_000210	ITGA6	6.78852	-0.103265	0.165165	-0.625225	0.531823	NA
NM_000212	ITGB3	1.89223	0.100814	0.107386	0.938802	0.347832	NA
NM_000214	JAG1	737.451	-0.274942	0.101168	-2.71768	0.00657413	0.0218501
NM_000215	JAK3	19.0333	-0.435928	0.189153	-2.30462	0.0211876	0.0522688
NM_000216	KAL1	1668.53	0.0103215	0.104234	0.0990227	0.92112	0.942236
NM_000217	KCNA1	1.32098	0.122012	0.0905956	1.34678	0.178052	NA
NM_000218	KCNQ1	0	NA	NA	NA	NA	NA
NM_000219	KCNE1	0.264939	0.0324582	0.040815	0.795252	0.426467	NA
NM_000220	KCNJ1	0	NA	NA	NA	NA	NA
NM_000221	KHK	251.409	-0.222001	0.126637	-1.75305	0.0795942	0.142946
NM_000222	KIT	5.95476	0.23466	0.158377	1.48166	0.138431	NA
NM_000223	KRT12	0	NA	NA	NA	NA	NA
NM_000224	KRT18	1.82051	0.0408458	0.102876	0.397041	0.691338	NA
NM_000226	KRT9	0	NA	NA	NA	NA	NA
NM_000227	LAMA3	0.497911	-0.0316628	0.0575448	-0.550228	0.582163	NA
NM_000228	LAMB3	0.602009	-0.0801048	0.0602602	-1.32932	0.183744	NA
NM_000229	LCAT	140.789	-0.0410395	0.139415	-0.294369	0.768476	0.826473
NM_000230	LEP	0.165025	-0.0221846	0.0322425	-0.688056	0.491417	NA
NM_000231	SGCG	0	NA	NA	NA	NA	NA
NM_000232	SGCB	788.769	-0.130099	0.101591	-1.28062	0.200327	0.292792
NM_000233	LHCGR	0.165025	-0.0221846	0.0322425	-0.688056	0.491417	NA
NM_000234	LIG1	1924.65	0.124169	0.0865723	1.43428	0.151494	0.235871
NM_000235	LIPA	1474.27	-0.293599	0.0960489	-3.05677	0.00223737	0.00986444
NM_000236	LIPC	0	NA	NA	NA	NA	NA
NM_000237	LPL	0.706677	0.0486402	0.0676397	0.719108	0.472075	NA
NM_000239	LYZ	1.96455	-0.0332846	0.104337	-0.319011	0.749718	NA
NM_000240	MAOA	0.144243	0.0178801	0.0304507	0.587182	0.557081	NA
NM_000242	MBL2	0	NA	NA	NA	NA	NA
NM_000243	MEFV	0.696253	-0.0943482	0.0652297	-1.4464	0.148066	NA
NM_000245	MET	41.0559	0.0795919	0.18295	0.435048	0.663527	0.742393
NM_000246	CIITA	0	NA	NA	NA	NA	NA
NM_000250	MPO	0.598585	0.0258449	0.0596344	0.433389	0.664732	NA
NM_000252	MTM1	383.135	-0.177928	0.114567	-1.55306	0.120409	0.196532
NM_000253	MTTP	0.648729	0.0380068	0.0644146	0.590033	0.555168	NA
NM_000255	MUT	1221.4	-0.211304	0.0971651	-2.17469	0.0296535	0.067041
NM_000256	MYBPC3	11.9122	-0.123077	0.181466	-0.678237	0.497621	0.59876
NM_000257	MYH7	0	NA	NA	NA	NA	NA
NM_000258	MYL3	2.31643	-0.0101451	0.107396	-0.0944645	0.92474	NA
NM_000260	MYO7A	1.9551	0.11344	0.105477	1.07549	0.282154	NA
NM_000261	MYOC	0.132469	0.0167661	0.0294891	0.568552	0.56966	NA
NM_000262	NAGA	1341.56	-0.413173	0.0968157	-4.26762	1.97565e-05	0.000298693
NM_000263	NAGLU	1155.26	0.0517143	0.0952045	0.543192	0.586998	0.677926
NM_000264	PTCH1	3488.79	-0.281118	0.0957351	-2.93642	0.0033203	0.0132844
NM_000265	NCF1	0	NA	NA	NA	NA	NA
NM_000266	NDP	0	NA	NA	NA	NA	NA
NM_000267	NF1	3708.68	-0.438413	0.104935	-4.17794	2.94158e-05	0.000403163
NM_000268	NF2	1615.68	-0.141535	0.0893695	-1.5837	0.113261	0.187558
NM_000270	PNP	1066.46	-0.330879	0.103414	-3.19956	0.00137637	0.006924
NM_000271	NPC1	644.117	-0.352904	0.104066	-3.39115	0.000696004	0.00422678
NM_000272	NPHP1	133.08	-0.20059	0.145604	-1.37764	0.168316	0.255776
NM_000273	GPR143	1.55299	0.0228852	0.0950067	0.24088	0.809648	NA
NM_000277	PAH	0	NA	NA	NA	NA	NA
NM_000278	PAX2	3.18799	0.290592	0.128579	2.26003	0.0238192	NA
NM_000283	PDE6B	7.40362	-0.234906	0.16679	-1.4084	0.159013	NA
NM_000285	PEPD	2494.52	-0.163681	0.0854991	-1.91442	0.0555667	0.107917
NM_000286	PEX12	307.469	0.0832272	0.122219	0.68097	0.495891	0.59699
NM_000287	PEX6	452.95	-0.695575	0.110817	-6.27678	3.45647e-10	7.07796e-08
NM_000288	PEX7	113.652	-0.128512	0.14837	-0.86616	0.386403	0.49121
NM_000290	PGAM2	62.3437	-0.253016	0.169734	-1.49066	0.136051	0.216277
NM_000291	PGK1	15414.2	-0.251428	0.0886483	-2.83625	0.00456472	0.0167614
NM_000292	PHKA2	958.785	-0.387413	0.102276	-3.7879	0.000151926	0.00139024
NM_000294	PHKG2	1154.8	-0.212538	0.0902159	-2.35589	0.0184786	0.0471699
NM_000295	SERPINA1	0	NA	NA	NA	NA	NA
NM_000296	PKD1	2598.76	-0.424001	0.0927912	-4.5694	4.89116e-06	0.000104858
NM_000297	PKD2	583.431	-0.132032	0.115143	-1.14668	0.251515	0.349636
NM_000298	PKLR	33.6383	-0.0883065	0.186283	-0.474044	0.635469	0.719808			0.584963
NM_000299	PKP1	0.309269	-0.00377776	0.0450428	-0.0838705	0.933159	NA
NM_000300	PLA2G2A	0	NA	NA	NA	NA	NA
NM_000301	PLG	0	NA	NA	NA	NA	NA
NM_000302	PLOD1	2917.37	-0.376839	0.0852536	-4.42021	9.86054e-06	0.000178343
NM_000303	PMM2	1668.07	-0.13481	0.0887181	-1.51954	0.128628	0.20703
NM_000305	PON2	840.16	-0.252607	0.100035	-2.52518	0.0115637	0.0332201
NM_000306	POU1F1	0	NA	NA	NA	NA	NA
NM_000307	POU3F4	0	NA	NA	NA	NA	NA
NM_000308	CTSA	3454.5	-0.142618	0.0936822	-1.52236	0.12792	0.206201
NM_000310	PPT1	4661.51	-0.236633	0.0892184	-2.65229	0.00799485	0.0252693
NM_000311	PRNP	708.89	-0.253936	0.110624	-2.2955	0.0217046	0.0531682
NM_000312	PROC	24.9281	-0.189768	0.189538	-1.00121	0.316725	0.421225
NM_000313	PROS1	641.355	-0.12914	0.11083	-1.16521	0.243934	0.341203
NM_000314	PTEN	3424.17	-0.326185	0.0967273	-3.37221	0.000745679	0.00444626
NM_000315	PTH	0.466116	0.0100751	0.0536393	0.187831	0.851009	NA
NM_000316	PTH1R	32.9254	0.545086	0.187967	2.89991	0.00373275	0.014497
NM_000317	PTS	361.336	-0.0499878	0.108598	-0.460302	0.6453	0.727718
NM_000318	PEX2	1301.4	-0.27776	0.0989649	-2.80665	0.00500599	0.0178768
NM_000320	QDPR	983.346	-0.0376988	0.0959398	-0.392943	0.694362	0.7675
NM_000321	RB1	2581.68	-0.437616	0.101166	-4.3257	1.52045e-05	0.000247182
NM_000322	PRPH2	117.778	-0.864303	0.148666	-5.81374	6.10913e-09	6.49981e-07
NM_000324	RHAG	0	NA	NA	NA	NA	NA
NM_000326	RLBP1	0.16973	0.0203348	0.0324771	0.626128	0.531231	NA
NM_000327	ROM1	46.2534	-0.238581	0.178329	-1.33787	0.180938	0.270584
NM_000329	RPE65	0	NA	NA	NA	NA	NA
NM_000330	RS1	0.16973	0.0203348	0.0324771	0.626128	0.531231	NA
NM_000331	SAA1	0.165025	-0.0221846	0.0322425	-0.688056	0.491417	NA
NM_000332	ATXN1	1362	-0.106982	0.100544	-1.06404	0.287311	0.389805
NM_000334	SCN4A	0.165025	-0.0221846	0.0322425	-0.688056	0.491417	NA
NM_000335	SCN5A	6.20512	0.1334	0.160462	0.831351	0.405775	NA
NM_000336	SCNN1B	0.332885	-0.007319	0.0461538	-0.158578	0.874001	NA
NM_000337	SGCD	0.200416	-0.0258074	0.0347035	-0.743654	0.457086	NA
NM_000338	SLC12A1	0	NA	NA	NA	NA	NA
NM_000339	SLC12A3	0	NA	NA	NA	NA	NA
NM_000340	SLC2A2	0	NA	NA	NA	NA	NA
NM_000341	SLC3A1	596.301	-0.407067	0.116415	-3.4967	0.000471046	0.00314982
NM_000342	SLC4A1	3.24831	-0.0857696	0.128111	-0.669495	0.50318	NA
NM_000343	SLC5A1	0	NA	NA	NA	NA	NA
NM_000344	SMN1	181.401	-0.155716	0.129321	-1.2041	0.228549	0.324143
NM_000345	SNCA	0	NA	NA	NA	NA	NA
NM_000346	SOX9	8.62583	0.155394	0.171686	0.905103	0.365411	0.470021
NM_000348	SRD5A2	0.276713	0.0375432	0.0439615	0.854002	0.393104	NA
NM_000349	STAR	11.1946	0.0710149	0.179284	0.396103	0.692029	0.765431
NM_000350	ABCA4	0.565199	0.0722578	0.0603118	1.19807	0.23089	NA
NM_000351	STS	321.771	0.052457	0.119742	0.438085	0.661325	0.740621
NM_000352	ABCC8	0	NA	NA	NA	NA	NA
NM_000353	TAT	0.144243	0.0178801	0.0304507	0.587182	0.557081	NA
NM_000354	SERPINA7	0	NA	NA	NA	NA	NA
NM_000355	TCN2	1.39463	-0.0246384	0.0915014	-0.269268	0.787724	NA
NM_000358	TGFBI	8.54047	-0.0262132	0.172089	-0.152324	0.878932	0.911429
NM_000359	TGM1	55.1246	0.415366	0.173699	2.39129	0.0167892	0.0439265
NM_000360	TH	0.297495	-0.00470443	0.044414	-0.105922	0.915644	NA
NM_000361	THBD	0	NA	NA	NA	NA	NA
NM_000362	TIMP3	27.6185	-0.142513	0.188204	-0.757224	0.448915	0.552331
NM_000363	TNNI3	114.233	-0.37216	0.145076	-2.56527	0.0103096	0.0305022
NM_000364	TNNT2	0.144243	0.0178801	0.0304507	0.587182	0.557081	NA
NM_000365	TPI1	16124.9	-0.160759	0.0855598	-1.87891	0.0602567	0.11484
NM_000367	TPMT	517.974	-0.387561	0.106488	-3.63948	0.000273189	0.00213922
NM_000369	TSHR	0	NA	NA	NA	NA	NA
NM_000370	TTPA	0.642154	-0.0118305	0.0662148	-0.178668	0.858198	NA
NM_000371	TTR	0	NA	NA	NA	NA	NA
NM_000372	TYR	0	NA	NA	NA	NA	NA
NM_000373	UMPS	2263.36	-0.193479	0.0942134	-2.05363	0.0400115	0.084093
NM_000374	UROD	813.314	-0.155622	0.0948553	-1.64062	0.100875	0.171006
NM_000375	UROS	1153.08	0.0316624	0.104799	0.302124	0.762558	0.821919
NM_000376	VDR	3.56774	0.115865	0.136607	0.848162	0.396348	NA
NM_000377	WAS	10.6479	-0.133717	0.179233	-0.74605	0.455637	0.558768
NM_000378	WT1	724.085	-0.169258	0.0989326	-1.71084	0.08711	0.152926
NM_000379	XDH	0	NA	NA	NA	NA	NA
NM_000380	XPA	543.383	0.127262	0.10102	1.25978	0.20775	0.301203
NM_000382	ALDH3A2	2008.53	-0.450932	0.102591	-4.39541	1.10562e-05	0.000195116
NM_000383	AIRE	42.8849	-0.153289	0.181876	-0.842821	0.399328	0.503829
NM_000384	APOB	0.132469	0.0167661	0.0294891	0.568552	0.56966	NA
NM_000386	BLMH	2054.41	-0.165236	0.0997061	-1.65723	0.0974735	0.166724
NM_000387	SLC25A20	462.553	-0.27893	0.105618	-2.64093	0.00826782	0.0258776
NM_000388	CASR	0	NA	NA	NA	NA	NA
NM_000390	CHM	1391.28	-0.305349	0.106243	-2.87407	0.00405216	0.0153427
NM_000391	TPP1	791.157	-0.470396	0.105233	-4.47002	7.82117e-06	0.00015098
NM_000392	ABCC2	24.321	-0.176704	0.189628	-0.931842	0.351418	0.456203
NM_000393	COL5A2	12759.8	-0.247927	0.0936326	-2.64787	0.00810018	0.0255266
NM_000394	CRYAA	26.0568	0.0613914	0.188743	0.325264	0.744981	0.808447
NM_000395	CSF2RB	0	NA	NA	NA	NA	NA
NM_000396	CTSK	38.6913	0.0136523	0.182659	0.074742	0.94042	0.95635
NM_000397	CYBB	0	NA	NA	NA	NA	NA
NM_000399	EGR2	1.23142	-0.124728	0.0864101	-1.44344	0.148896	NA
NM_000400	ERCC2	1060.69	-0.238973	0.0938332	-2.54678	0.010872	0.0316866
NM_000401	EXT2	1801.07	-0.326797	0.0967204	-3.37878	0.000728074	0.00437444
NM_000402	G6PD	1977.81	-0.237259	0.0915597	-2.5913	0.00956137	0.0287842
NM_000405	GM2A	603.345	-0.330254	0.105513	-3.13	0.00174808	0.0082511
NM_000406	GNRHR	4.49034	-0.101028	0.146247	-0.690807	0.489687	NA
NM_000407	GP1BB	280.535	-0.0856917	0.121698	-0.704134	0.481349	0.583289
NM_000408	GPD2	2009.4	-0.252833	0.0992808	-2.54664	0.0108764	0.0316902
NM_000409	GUCA1A	0.144243	0.0178801	0.0304507	0.587182	0.557081	NA
NM_000412	HRG	0	NA	NA	NA	NA	NA
NM_000413	HSD17B1	422.941	-0.167599	0.108951	-1.5383	0.123975	0.201035
NM_000415	IAPP	0.144243	0.0178801	0.0304507	0.587182	0.557081	NA
NM_000416	IFNGR1	593.441	0.00753818	0.105362	0.0715456	0.942964	0.958415
NM_000417	IL2RA	0	NA	NA	NA	NA	NA
NM_000418	IL4R	7.67979	0.166135	0.16824	0.987486	0.323405	NA
NM_000419	ITGA2B	24.1379	-0.152952	0.189352	-0.807766	0.419225	0.523634
NM_000420	KEL	6.29163	-0.233169	0.161038	-1.44791	0.147642	NA
NM_000421	KRT10	688.164	0.046084	0.0983082	0.468771	0.639233	0.723007
NM_000422	KRT17	1.56573	0.0588409	0.0982895	0.598649	0.549407	NA
NM_000423	KRT2	0	NA	NA	NA	NA	NA
NM_000424	KRT5	0	NA	NA	NA	NA	NA
NM_000426	LAMA2	180.124	-0.373978	0.137125	-2.72728	0.00638596	0.0213774
NM_000427	LOR	0	NA	NA	NA	NA	NA
NM_000428	LTBP2	13.1195	0.216234	0.183976	1.17534	0.23986	0.336576
NM_000429	MAT1A	16.3967	0.229827	0.188461	1.2195	0.222656	0.317669
NM_000430	PAFAH1B1	4141.05	-0.161605	0.0940535	-1.71822	0.0857557	0.151161
NM_000432	MYL2	0.132469	0.0167661	0.0294891	0.568552	0.56966	NA
NM_000433	NCF2	0.16973	0.0203348	0.0324771	0.626128	0.531231	NA
NM_000434	NEU1	0	NA	NA	NA	NA	NA
NM_000435	NOTCH3	821.349	-0.375405	0.102453	-3.66418	0.000248133	0.00199614
NM_000436	OXCT1	3072.47	-0.284158	0.0943447	-3.01191	0.00259607	0.0109889
NM_000437	PAFAH2	180.955	-0.0047539	0.133087	-0.0357202	0.971505	0.979386
NM_000439	PCSK1	0	NA	NA	NA	NA	NA
NM_000440	PDE6A	2.54416	0.0448695	0.121311	0.369871	0.711479	NA
NM_000441	SLC26A4	15.7341	-0.274539	0.18778	-1.46202	0.143735	0.226397
NM_000442	PECAM1	0.297495	-0.00470443	0.044414	-0.105922	0.915644	NA
NM_000443	ABCB4	1.20811	0.0614052	0.0859257	0.714631	0.474837	NA
NM_000444	PHEX	0.446443	0.0627939	0.0565675	1.11007	0.266969	NA
NM_000446	PON1	0	NA	NA	NA	NA	NA
NM_000447	PSEN2	680.064	-0.208845	0.0995615	-2.09765	0.0359361	0.0776119
NM_000448	RAG1	12.8763	-0.108243	0.183874	-0.588677	0.556078	0.651503
NM_000450	SELE	0.144243	0.0178801	0.0304507	0.587182	0.557081	NA
NM_000451	SHOX	0	NA	NA	NA	NA	NA
NM_000452	SLC10A2	0	NA	NA	NA	NA	NA
NM_000453	SLC5A5	2.79136	0.12093	0.12367	0.977841	0.328153	NA
NM_000454	SOD1	8190.34	-0.173122	0.0887011	-1.95174	0.0509689	0.101009
NM_000455	STK11	2771.22	-0.270445	0.0800125	-3.38003	0.000724767	0.00436334
NM_000456	SUOX	862.15	-0.227798	0.0967395	-2.35475	0.0185349	0.0472855
NM_000457	HNF4A	0.636956	0.0370579	0.0640525	0.578556	0.562889	NA
NM_000458	HNF1B	0	NA	NA	NA	NA	NA
NM_000459	TEK	0.165025	-0.0221846	0.0322425	-0.688056	0.491417	NA
NM_000462	UBE3A	2031.08	-0.268494	0.0975831	-2.75144	0.00593333	0.0203194
NM_000463	UGT1A1	0	NA	NA	NA	NA	NA
NM_000474	TWIST1	8631.84	-0.338698	0.078788	-4.29885	1.71683e-05	0.000269156
NM_000475	NR0B1	0	NA	NA	NA	NA	NA
NM_000476	AK1	440.147	-0.16935	0.105054	-1.61202	0.106957	0.179227
NM_000477	ALB	0.746252	-0.058832	0.0675371	-0.871106	0.383696	NA
NM_000479	AMH	521.08	-0.185416	0.113215	-1.63774	0.101476	0.171743
NM_000480	AMPD3	4.65779	0.0944695	0.145871	0.647624	0.517228	NA
NM_000482	APOA4	0	NA	NA	NA	NA	NA
NM_000483	APOC2	0.370908	-0.0046177	0.0479474	-0.0963076	0.923276	NA
NM_000485	APRT	1605.83	-0.135851	0.0902924	-1.50456	0.132436	0.211735
NM_000486	AQP2	0.144243	0.0178801	0.0304507	0.587182	0.557081	NA
NM_000487	ARSA	241.119	-0.271902	0.118412	-2.29625	0.0216617	0.05312
NM_000488	SERPINC1	1.18466	0.0101642	0.0837241	0.121401	0.903374	NA
NM_000490	AVP	0.144243	0.0178801	0.0304507	0.587182	0.557081	NA
NM_000491	C1QB	0	NA	NA	NA	NA	NA
NM_000492	CFTR	0.200416	-0.0258074	0.0347035	-0.743654	0.457086	NA
NM_000493	COL10A1	0.642154	-0.0118305	0.0662148	-0.178668	0.858198	NA
NM_000494	COL17A1	6.45865	0.121185	0.153383	0.790077	0.429483	NA
NM_000495	COL4A5	3027.01	-0.394698	0.0940242	-4.19783	2.69479e-05	0.000377713
NM_000496	CRYBB2	0.201177	-0.0258809	0.0347514	-0.744745	0.456426	NA
NM_000497	CYP11B1	0	NA	NA	NA	NA	NA
NM_000498	CYP11B2	0	NA	NA	NA	NA	NA
NM_000499	CYP1A1	30.8268	0.732561	0.187732	3.90217	9.53353e-05	0.000982503
NM_000500	CYP21A2	0	NA	NA	NA	NA	NA
NM_000502	EPX	9.34683	0.1518	0.174675	0.869039	0.384826	0.489539
NM_000504	F10	0.623242	0.0360907	0.0636443	0.567069	0.570667	NA
NM_000505	F12	77.5032	-0.583424	0.161263	-3.61783	0.000297083	0.00226879
NM_000506	F2	0	NA	NA	NA	NA	NA
NM_000507	FBP1	0.503377	0.0141687	0.0575266	0.246298	0.805452	NA
NM_000508	FGA	0.165025	-0.0221846	0.0322425	-0.688056	0.491417	NA
NM_000510	FSHB	0	NA	NA	NA	NA	NA
NM_000511	FUT2	6.41008	-0.0846576	0.162211	-0.521898	0.601741	NA
NM_000512	GALNS	591.397	-0.451873	0.102014	-4.42953	9.44405e-06	0.000172742
NM_000513	OPN1MW	0	NA	NA	NA	NA	NA
NM_000514	GDNF	0.578912	0.080661	0.0637538	1.26519	0.205802	NA
NM_000515	GH1	0	NA	NA	NA	NA	NA
NM_000517	HBA2	28.5252	-0.0542374	0.187874	-0.28869	0.772819	0.829622
NM_000518	HBB	0	NA	NA	NA	NA	NA
NM_000519	HBD	0	NA	NA	NA	NA	NA
NM_000520	HEXA	1433.63	-0.15869	0.0953691	-1.66395	0.0961221	0.165006
NM_000521	HEXB	1213.51	-0.354193	0.0914314	-3.87386	0.000107123	0.00106995
NM_000522	HOXA13	0.641661	0.0785367	0.0627843	1.2509	0.210972	NA
NM_000523	HOXD13	4.67435	0.0721507	0.147048	0.490661	0.623666	NA
NM_000524	HTR1A	0	NA	NA	NA	NA	NA
NM_000525	KCNJ11	1.14553	0.002795	0.0879566	0.0317771	0.97465	NA
NM_000526	KRT14	0	NA	NA	NA	NA	NA
NM_000527	LDLR	3204.86	-1.06881	0.091623	-11.6653	1.91743e-31	1.14651e-27
NM_000528	MAN2B1	1464.31	-0.207477	0.0866175	-2.39532	0.0166059	0.0435956
NM_000529	MC2R	0.144243	0.0178801	0.0304507	0.587182	0.557081	NA
NM_000530	MPZ	0.144243	0.0178801	0.0304507	0.587182	0.557081	NA
NM_000531	OTC	0	NA	NA	NA	NA	NA
NM_000532	PCCB	1736.3	-0.265579	0.0936579	-2.83562	0.00457365	0.0167818
NM_000533	PLP1	0.572085	-0.029144	0.0576609	-0.505438	0.613251	NA
NM_000535	PMS2	492.044	-0.178858	0.109711	-1.63026	0.103046	0.17382
NM_000536	RAG2	0	NA	NA	NA	NA	NA
NM_000537	REN	0	NA	NA	NA	NA	NA
NM_000538	RFXAP	426.945	-0.389058	0.111053	-3.50337	0.000459419	0.00309746
NM_000539	RHO	0	NA	NA	NA	NA	NA
NM_000540	RYR1	18.4669	0.00439959	0.189387	0.0232307	0.981466	0.986714
NM_000541	SAG	0	NA	NA	NA	NA	NA
NM_000542	SFTPB	1.01954	0.07981	0.0787919	1.01292	0.311098	NA
NM_000543	SMPD1	186.042	0.129583	0.128201	1.01078	0.31212	0.416193
NM_000544	TAP2	15.2702	-0.301997	0.186688	-1.61766	0.105736	0.17754
NM_000545	HNF1A	38.041	-0.16173	0.182211	-0.8876	0.374756	0.47975
NM_000547	TPO	0.344659	-0.00638157	0.046736	-0.136545	0.89139	NA
NM_000549	TSHB	0	NA	NA	NA	NA	NA
NM_000550	TYRP1	0	NA	NA	NA	NA	NA
NM_000552	VWF	0	NA	NA	NA	NA	NA
NM_000553	WRN	1401.13	-0.29665	0.107103	-2.76977	0.00560951	0.0194601
NM_000554	CRX	0	NA	NA	NA	NA	NA
NM_000555	DCX	0	NA	NA	NA	NA	NA
NM_000557	GDF5	0.976562	-0.0185828	0.0784927	-0.236746	0.812854	NA
NM_000558	HBA1	49.8936	-0.0547748	0.177173	-0.309159	0.757201	0.81773
NM_000559	HBG1	0	NA	NA	NA	NA	NA
NM_000560	CD53	0	NA	NA	NA	NA	NA
NM_000561	GSTM1	6.48249	0.0401065	0.16271	0.24649	0.805303	NA
NM_000562	C8A	0	NA	NA	NA	NA	NA
NM_000564	IL5RA	0.276713	0.0375432	0.0439615	0.854002	0.393104	NA
NM_000565	IL6R	3.41501	0.281591	0.133903	2.10296	0.0354696	NA
NM_000566	FCGR1A	0	NA	NA	NA	NA	NA
NM_000567	CRP	0	NA	NA	NA	NA	NA
NM_000569	FCGR3A	0	NA	NA	NA	NA	NA
NM_000570	FCGR3B	0	NA	NA	NA	NA	NA
NM_000572	IL10	0	NA	NA	NA	NA	NA
NM_000573	CR1	0	NA	NA	NA	NA	NA
NM_000575	IL1A	0.677544	-0.0135508	0.0648585	-0.208929	0.834503	NA
NM_000576	IL1B	0.165025	-0.0221846	0.0322425	-0.688056	0.491417	NA
NM_000577	IL1RN	0	NA	NA	NA	NA	NA
NM_000578	SLC11A1	7.45579	0.0616265	0.167768	0.367331	0.713372	NA
NM_000579	CCR5	0	NA	NA	NA	NA	NA
NM_000583	GC	0	NA	NA	NA	NA	NA
NM_000584	CXCL8	0	NA	NA	NA	NA	NA
NM_000586	IL2	0	NA	NA	NA	NA	NA
NM_000587	C7	0	NA	NA	NA	NA	NA
NM_000588	IL3	0	NA	NA	NA	NA	NA
NM_000589	IL4	0.165025	-0.0221846	0.0322425	-0.688056	0.491417	NA
NM_000590	IL9	0	NA	NA	NA	NA	NA
NM_000591	CD14	4.41393	-0.0785298	0.142841	-0.549769	0.582478	NA
NM_000593	TAP1	0	NA	NA	NA	NA	NA
NM_000594	TNF	0	NA	NA	NA	NA	NA
NM_000595	LTA	0	NA	NA	NA	NA	NA
NM_000596	IGFBP1	0	NA	NA	NA	NA	NA
NM_000597	IGFBP2	1662.01	-0.190591	0.0829979	-2.29633	0.0216568	0.0531151
NM_000598	IGFBP3	26.9336	0.351167	0.188634	1.86163	0.0626554	0.118453
NM_000599	IGFBP5	0.747013	-0.0588873	0.0675564	-0.871677	0.383385	NA
NM_000600	IL6	0.3022	0.0399597	0.0453408	0.881319	0.378145	NA
NM_000601	HGF	0	NA	NA	NA	NA	NA
NM_000602	SERPINE1	1.58367	-0.0212681	0.097654	-0.21779	0.827593	NA
NM_000603	NOS3	26.5577	-0.103385	0.188754	-0.547726	0.58388	0.6755
NM_000605	IFNA2	0	NA	NA	NA	NA	NA
NM_000606	C8G	0.297495	-0.00470443	0.044414	-0.105922	0.915644	NA
NM_000607	ORM1	0	NA	NA	NA	NA	NA
NM_000608	ORM2	0	NA	NA	NA	NA	NA
NM_000609	CXCL12	2.00586	0.159786	0.109474	1.45959	0.144403	NA
NM_000610	CD44	0	NA	NA	NA	NA	NA
NM_000613	HPX	1.22254	-0.00967262	0.0368296	-0.262631	0.792835	NA
NM_000614	CNTF	38.081	0.376662	0.18442	2.04242	0.0411099	0.0858884
NM_000618	IGF1	0	NA	NA	NA	NA	NA
NM_000619	IFNG	0	NA	NA	NA	NA	NA
NM_000620	NOS1	0	NA	NA	NA	NA	NA
NM_000621	HTR2A	0.132469	0.0167661	0.0294891	0.568552	0.56966	NA
NM_000623	BDKRB2	0	NA	NA	NA	NA	NA
NM_000624	SERPINA5	0	NA	NA	NA	NA	NA
NM_000625	NOS2	2.08466	-0.164649	0.109868	-1.4986	0.133977	NA
NM_000626	CD79B	0.919628	0.0263494	0.0774217	0.340336	0.733603	NA
NM_000628	IL10RB	1583.59	-0.242642	0.098156	-2.47201	0.0134357	0.0370833
NM_000629	IFNAR1	2465.37	-0.112997	0.0990377	-1.14095	0.253891	0.352214
NM_000631	NCF4	0	NA	NA	NA	NA	NA
NM_000632	ITGAM	1.496	0.045445	0.0954525	0.4761	0.634003	NA
NM_000634	CXCR1	0	NA	NA	NA	NA	NA
NM_000635	RFX2	275.06	-0.375906	0.117444	-3.20073	0.00137081	0.006903
NM_000636	SOD2	1329.44	-0.318139	0.0946797	-3.36017	0.000778958	0.00456012
NM_000638	VTN	1.82211	-0.0452573	0.104925	-0.431332	0.666227	NA
NM_000639	FASLG	0	NA	NA	NA	NA	NA
NM_000640	IL13RA2	0	NA	NA	NA	NA	NA
NM_000644	AGL	1708.44	-0.431942	0.0937845	-4.60569	4.11098e-06	9.38214e-05
NM_000655	SELL	0.710862	-0.0601548	0.0688268	-0.874002	0.382117	NA
NM_000657	BCL2	99.6027	-0.321209	0.151566	-2.11926	0.0340684	0.0745695
NM_000660	TGFB1	1900.33	-0.404071	0.0912231	-4.42948	9.44625e-06	0.000172742
NM_000667	ADH1A	0	NA	NA	NA	NA	NA
NM_000668	ADH1B	0	NA	NA	NA	NA	NA
NM_000669	ADH1C	0	NA	NA	NA	NA	NA
NM_000670	ADH4	0	NA	NA	NA	NA	NA
NM_000671	ADH5	2734.53	-0.239963	0.0918977	-2.6112	0.00902264	0.0276383
NM_000672	ADH6	0.570562	-0.0290346	0.0576123	-0.503965	0.614286	NA
NM_000673	ADH7	0	NA	NA	NA	NA	NA
NM_000674	ADORA1	1.18016	-5.47467e-06	0.0836415	-6.5454e-05	0.999948	NA
NM_000676	ADORA2B	3.76313	-0.0555085	0.135499	-0.409659	0.682056	NA
NM_000677	ADORA3	1.30661	-0.0627082	0.0886169	-0.707633	0.479173	NA
NM_000678	ADRA1D	0.201177	-0.0258809	0.0347514	-0.744745	0.456426	NA
NM_000679	ADRA1B	0	NA	NA	NA	NA	NA
NM_000680	ADRA1A	0	NA	NA	NA	NA	NA
NM_000681	ADRA2A	10.6197	0.448938	0.177299	2.53209	0.0113385	0.0326923
NM_000682	ADRA2B	0.276713	0.0375432	0.0439615	0.854002	0.393104	NA
NM_000683	ADRA2C	32.2772	0.667634	0.186735	3.5753	0.000349828	0.00254686
NM_000684	ADRB1	2.18214	-0.0114413	0.113117	-0.101145	0.919435	NA
NM_000685	AGTR1	0.132469	0.0167661	0.0294891	0.568552	0.56966	NA
NM_000686	AGTR2	0.333647	-0.00737081	0.0461889	-0.15958	0.873212	NA
NM_000687	AHCY	5376.57	-0.141216	0.0844952	-1.67129	0.094664	0.163169
NM_000688	ALAS1	920.579	-0.0674717	0.0965569	-0.698777	0.484692	0.586507
NM_000689	ALDH1A1	0	NA	NA	NA	NA	NA
NM_000691	ALDH3A1	0	NA	NA	NA	NA	NA
NM_000692	ALDH1B1	1771.11	-0.430308	0.0934937	-4.60253	4.17383e-06	9.44624e-05
NM_000695	ALDH3B2	0.264939	0.0324582	0.040815	0.795252	0.426467	NA
NM_000696	ALDH9A1	1847.28	-0.0903227	0.0919437	-0.982369	0.325918	0.430787
NM_000697	ALOX12	60.1422	-0.0588881	0.16897	-0.348512	0.727456	0.794463
NM_000698	ALOX5	0.503377	0.0141687	0.0575266	0.246298	0.805452	NA
NM_000699	AMY2A	0.200416	-0.0258074	0.0347035	-0.743654	0.457086	NA
NM_000700	ANXA1	0.16973	0.0203348	0.0324771	0.626128	0.531231	NA
NM_000701	ATP1A1	7250.48	-0.275072	0.0943538	-2.91532	0.00355324	0.0139907
NM_000702	ATP1A2	0.201177	-0.0258809	0.0347514	-0.744745	0.456426	NA
NM_000704	ATP4A	1.62266	0.0151092	0.101232	0.149254	0.881353	NA
NM_000705	ATP4B	0.201177	-0.0258809	0.0347514	-0.744745	0.456426	NA
NM_000706	AVPR1A	0	NA	NA	NA	NA	NA
NM_000707	AVPR1B	0	NA	NA	NA	NA	NA
NM_000709	BCKDHA	685.91	-0.00826969	0.0943819	-0.0876194	0.930179	0.948938
NM_000710	BDKRB1	0	NA	NA	NA	NA	NA
NM_000713	BLVRB	446.616	-0.185645	0.107743	-1.72303	0.0848838	0.149863
NM_000714	TSPO	1358.28	-0.282147	0.094354	-2.9903	0.00278703	0.0116163
NM_000715	C4BPA	0	NA	NA	NA	NA	NA
NM_000716	C4BPB	0.144243	0.0178801	0.0304507	0.587182	0.557081	NA
NM_000717	CA4	11.6533	0.00675666	0.182559	0.0370109	0.970476	0.978759
NM_000718	CACNA1B	7.0628	0.079009	0.161201	0.490126	0.624045	NA
NM_000720	CACNA1D	332.205	-0.0031135	0.169026	-0.0184203	0.985304	0.989374
NM_000721	CACNA1E	0	NA	NA	NA	NA	NA
NM_000722	CACNA2D1	417.654	-0.0474514	0.126184	-0.376049	0.70688	0.777828
NM_000723	CACNB1	360.834	-0.205167	0.110928	-1.84956	0.0643777	0.120982
NM_000724	CACNB2	44.1762	0.125353	0.180397	0.694874	0.487134	0.588731
NM_000725	CACNB3	447.603	-0.438132	0.10241	-4.27823	1.88385e-05	0.000288533
NM_000727	CACNG1	0	NA	NA	NA	NA	NA
NM_000728	CALCB	0.16973	0.0203348	0.0324771	0.626128	0.531231	NA
NM_000729	CCK	0	NA	NA	NA	NA	NA
NM_000730	CCKAR	0	NA	NA	NA	NA	NA
NM_000732	CD3D	0	NA	NA	NA	NA	NA
NM_000733	CD3E	0.333647	-0.00737081	0.0461889	-0.15958	0.873212	NA
NM_000734	CD247	3.32961	-0.00855955	0.133188	-0.0642668	0.948758	NA
NM_000735	CGA	0	NA	NA	NA	NA	NA
NM_000737	CGB	0	NA	NA	NA	NA	NA
NM_000738	CHRM1	3.85001	-0.017067	0.139313	-0.122508	0.902497	NA
NM_000739	CHRM2	0	NA	NA	NA	NA	NA
NM_000740	CHRM3	1.07564	0.0440227	0.0811121	0.542739	0.587309	NA
NM_000741	CHRM4	220.53	-0.194317	0.122993	-1.5799	0.114129	0.188608
NM_000742	CHRNA2	0	NA	NA	NA	NA	NA
NM_000744	CHRNA4	43.1391	-0.450752	0.179377	-2.51288	0.0119752	0.0341005
NM_000745	CHRNA5	697.667	-0.481614	0.105403	-4.56925	4.89475e-06	0.000104858
NM_000746	CHRNA7	0.829124	0.0538388	0.0714781	0.753221	0.451317	NA
NM_000747	CHRNB1	144.724	-0.120274	0.138218	-0.870173	0.384206	0.488979
NM_000748	CHRNB2	19.2296	0.0965344	0.189418	0.509636	0.610307	0.698452
NM_000749	CHRNB3	0	NA	NA	NA	NA	NA
NM_000750	CHRNB4	0.47193	0.059997	0.0552107	1.08669	0.277173	NA
NM_000751	CHRND	0.742829	0.0463913	0.0686196	0.676065	0.498999	NA
NM_000756	CRH	0	NA	NA	NA	NA	NA
NM_000757	CSF1	14.2726	-0.303823	0.185489	-1.63796	0.10143	0.171693
NM_000758	CSF2	0	NA	NA	NA	NA	NA
NM_000759	CSF3	0.400832	-0.049752	0.0479334	-1.03794	0.299298	NA
NM_000760	CSF3R	0.264939	0.0324582	0.040815	0.795252	0.426467	NA
NM_000761	CYP1A2	0.16973	0.0203348	0.0324771	0.626128	0.531231	NA
NM_000762	CYP2A6	0.264939	0.0324582	0.040815	0.795252	0.426467	NA
NM_000764	CYP2A7	0	NA	NA	NA	NA	NA
NM_000765	CYP3A7	4.53397	-0.143197	0.144889	-0.988325	0.322993	NA
NM_000766	CYP2A13	0	NA	NA	NA	NA	NA
NM_000767	CYP2B6	0	NA	NA	NA	NA	NA
NM_000769	CYP2C19	0	NA	NA	NA	NA	NA
NM_000770	CYP2C8	0.132469	0.0167661	0.0294891	0.568552	0.56966	NA
NM_000771	CYP2C9	0	NA	NA	NA	NA	NA
NM_000772	CYP2C18	0	NA	NA	NA	NA	NA
NM_000773	CYP2E1	30.97	-0.00803441	0.186729	-0.0430272	0.96568	0.975237
NM_000774	CYP2F1	0	NA	NA	NA	NA	NA
NM_000775	CYP2J2	1.16908	0.00440205	0.0857041	0.0513634	0.959036	NA
NM_000777	CYP3A5	2.76454	-0.043431	0.121988	-0.356026	0.721821	NA
NM_000778	CYP4A11	0	NA	NA	NA	NA	NA
NM_000779	CYP4B1	0	NA	NA	NA	NA	NA
NM_000780	CYP7A1	0	NA	NA	NA	NA	NA
NM_000781	CYP11A1	0	NA	NA	NA	NA	NA
NM_000782	CYP24A1	0.920737	0.0315101	0.0774627	0.406777	0.684172	NA
NM_000783	CYP26A1	1354.76	-0.407801	0.0982337	-4.15133	3.30545e-05	0.000438239
NM_000784	CYP27A1	2.14771	0.0231686	0.109478	0.211628	0.832397	NA
NM_000785	CYP27B1	86.4507	0.143413	0.15582	0.920376	0.357376	0.461812
NM_000786	CYP51A1	3025.42	-0.697299	0.0932249	-7.47975	7.44636e-14	6.39345e-11
NM_000787	DBH	153.315	-0.690543	0.13655	-5.05706	4.25762e-07	1.70028e-05
NM_000788	DCK	673.574	-0.332358	0.106039	-3.13429	0.00172269	0.00816992
NM_000789	ACE	18.2678	-0.160426	0.189492	-0.846609	0.397213	0.501986
NM_000790	DDC	0	NA	NA	NA	NA	NA
NM_000792	DIO1	2.5438	-0.144736	0.11331	-1.27735	0.20148	NA
NM_000793	DIO2	0	NA	NA	NA	NA	NA
NM_000794	DRD1	0	NA	NA	NA	NA	NA
NM_000795	DRD2	0.333647	-0.00737081	0.0461889	-0.15958	0.873212	NA
NM_000796	DRD3	0	NA	NA	NA	NA	NA
NM_000797	DRD4	21.1907	0.117142	0.1898	0.617184	0.537114	0.634707
NM_000798	DRD5	0	NA	NA	NA	NA	NA
NM_000799	EPO	16.7205	-0.164884	0.188817	-0.873249	0.382527	0.487444
NM_000800	FGF1	0	NA	NA	NA	NA	NA
NM_000802	FOLR1	0	NA	NA	NA	NA	NA
NM_000803	FOLR2	0	NA	NA	NA	NA	NA
NM_000804	FOLR3	0	NA	NA	NA	NA	NA
NM_000805	GAST	0	NA	NA	NA	NA	NA
NM_000806	GABRA1	0.297495	-0.00470443	0.044414	-0.105922	0.915644	NA
NM_000807	GABRA2	0.562434	0.0280992	0.0584649	0.480616	0.630789	NA
NM_000808	GABRA3	0	NA	NA	NA	NA	NA
NM_000809	GABRA4	0	NA	NA	NA	NA	NA
NM_000810	GABRA5	1.21282	0.108333	0.0875107	1.23794	0.215738	NA
NM_000811	GABRA6	0	NA	NA	NA	NA	NA
NM_000812	GABRB1	0.132469	0.0167661	0.0294891	0.568552	0.56966	NA
NM_000813	GABRB2	0.478999	0.0175425	0.0567009	0.309386	0.757028	NA
NM_000814	GABRB3	0.344659	-0.00638157	0.046736	-0.136545	0.89139	NA
NM_000815	GABRD	10.0223	-0.000426366	0.178966	-0.00238239	0.998099	0.998868
NM_000816	GABRG2	0	NA	NA	NA	NA	NA
NM_000817	GAD1	29.8359	0.443361	0.187324	2.36682	0.0179417	0.0461437
NM_000818	GAD2	0	NA	NA	NA	NA	NA
NM_000819	GART	10789.2	-0.556996	0.093522	-5.95578	2.5884e-09	3.53219e-07
NM_000820	GAS6	612.643	-0.237147	0.0961989	-2.46518	0.0136945	0.0376333
NM_000823	GHRHR	0	NA	NA	NA	NA	NA
NM_000824	GLRB	0.165025	-0.0221846	0.0322425	-0.688056	0.491417	NA
NM_000826	GRIA2	0	NA	NA	NA	NA	NA
NM_000827	GRIA1	0	NA	NA	NA	NA	NA
NM_000828	GRIA3	0	NA	NA	NA	NA	NA
NM_000829	GRIA4	0	NA	NA	NA	NA	NA
NM_000830	GRIK1	1.48499	0.0463952	0.0972098	0.477269	0.633171	NA
NM_000831	GRIK3	1739.63	0.147241	0.106141	1.38722	0.165376	0.252283
NM_000833	GRIN2A	0	NA	NA	NA	NA	NA
NM_000834	GRIN2B	0.409182	0.0543861	0.0526246	1.03347	0.301382	NA
NM_000836	GRIN2D	650.768	-0.650111	0.102329	-6.35315	2.10953e-10	4.742e-08
NM_000837	GRINA	2787.93	-0.35697	0.0898193	-3.97431	7.05823e-05	0.000781253
NM_000839	GRM2	1.1792	-0.0322716	0.083904	-0.384625	0.700515	NA
NM_000840	GRM3	0	NA	NA	NA	NA	NA
NM_000841	GRM4	4.40511	0.120516	0.145498	0.828303	0.407499	NA
NM_000842	GRM5	0	NA	NA	NA	NA	NA
NM_000843	GRM6	0	NA	NA	NA	NA	NA
NM_000844	GRM7	0	NA	NA	NA	NA	NA
NM_000845	GRM8	0.344659	-0.00638157	0.046736	-0.136545	0.89139	NA
NM_000846	GSTA2	0	NA	NA	NA	NA	NA
NM_000847	GSTA3	0	NA	NA	NA	NA	NA
NM_000848	GSTM2	180.024	-0.205125	0.137888	-1.48762	0.13685	0.217247
NM_000851	GSTM5	0	NA	NA	NA	NA	NA
NM_000852	GSTP1	4075.86	-0.141542	0.0824344	-1.71703	0.0859746	0.151488
NM_000853	GSTT1	0	NA	NA	NA	NA	NA
NM_000854	GSTT2	0	NA	NA	NA	NA	NA
NM_000855	GUCY1A2	63.6987	0.645468	0.17416	3.70618	0.000210407	0.00177198
NM_000856	GUCY1A3	17.6379	-0.304068	0.187969	-1.61765	0.105739	0.17754
NM_000858	GUK1	3404.88	-0.125849	0.0831863	-1.51286	0.130316	0.209154
NM_000859	HMGCR	3295.63	-0.40861	0.0974638	-4.19243	2.75985e-05	0.000384668
NM_000860	HPGD	0.16973	0.0203348	0.0324771	0.626128	0.531231	NA
NM_000861	HRH1	0.333647	-0.00737081	0.0461889	-0.15958	0.873212	NA
NM_000862	HSD3B1	0	NA	NA	NA	NA	NA
NM_000863	HTR1B	0	NA	NA	NA	NA	NA
NM_000864	HTR1D	0	NA	NA	NA	NA	NA
NM_000865	HTR1E	0	NA	NA	NA	NA	NA
NM_000866	HTR1F	0	NA	NA	NA	NA	NA
NM_000867	HTR2B	12.2117	-0.163497	0.181444	-0.901093	0.367539	0.47221
NM_000868	HTR2C	0	NA	NA	NA	NA	NA
NM_000869	HTR3A	0	NA	NA	NA	NA	NA
NM_000870	HTR4	0	NA	NA	NA	NA	NA
NM_000871	HTR6	1.12115	0.00601477	0.0856198	0.0702498	0.943995	NA
NM_000872	HTR7	0.434669	0.0566928	0.0537058	1.05562	0.291143	NA
NM_000873	ICAM2	0.653928	-0.0100851	0.0642025	-0.157083	0.875179	NA
NM_000874	IFNAR2	699.003	-0.378828	0.100855	-3.75617	0.000172533	0.00153427
NM_000875	IGF1R	1285.14	-0.201462	0.10165	-1.98193	0.0474876	0.0958117
NM_000876	IGF2R	3281.88	-0.432205	0.102079	-4.23401	2.29565e-05	0.000336107
NM_000877	IL1R1	0.200416	-0.0258074	0.0347035	-0.743654	0.457086	NA
NM_000878	IL2RB	0.3022	0.0399597	0.0453408	0.881319	0.378145	NA
NM_000879	IL5	0	NA	NA	NA	NA	NA
NM_000880	IL7	9.89919	-0.221838	0.177133	-1.25238	0.210431	0.304072
NM_000882	IL12A	0	NA	NA	NA	NA	NA
NM_000884	IMPDH2	6360.36	-0.251442	0.0862712	-2.91455	0.00356197	0.0140121
NM_000885	ITGA4	0.672346	0.034776	0.0650774	0.53438	0.593079	NA
NM_000887	ITGAX	0.653928	-0.0100851	0.0642025	-0.157083	0.875179	NA
NM_000888	ITGB6	0	NA	NA	NA	NA	NA
NM_000889	ITGB7	16.1422	-0.0632655	0.183582	-0.344617	0.730382	0.796769
NM_000890	KCNJ5	0.144243	0.0178801	0.0304507	0.587182	0.557081	NA
NM_000891	KCNJ2	0.144243	0.0178801	0.0304507	0.587182	0.557081	NA
NM_000892	KLKB1	0	NA	NA	NA	NA	NA
NM_000893	KNG1	0	NA	NA	NA	NA	NA
NM_000894	LHB	7.29853	0.0533822	0.165966	0.321645	0.747722	NA
NM_000896	CYP4F3	0.866948	-0.0390081	0.0718402	-0.542985	0.58714	NA
NM_000898	MAOB	0	NA	NA	NA	NA	NA
NM_000899	KITLG	8266.54	-0.0708566	0.0954871	-0.742054	0.458055	0.561045
NM_000900	MGP	0	NA	NA	NA	NA	NA
NM_000902	MME	0	NA	NA	NA	NA	NA
NM_000905	NPY	0	NA	NA	NA	NA	NA
NM_000906	NPR1	19.2051	-0.12098	0.189582	-0.638142	0.523381	0.622292
NM_000908	NPR3	1.22577	0.112393	0.0889124	1.26408	0.2062	NA
NM_000909	NPY1R	1.55188	0.0188566	0.0976897	0.193025	0.846939	NA
NM_000910	NPY2R	0	NA	NA	NA	NA	NA
NM_000911	OPRD1	1.97435	0.203907	0.106811	1.90904	0.0562569	NA
NM_000912	OPRK1	0	NA	NA	NA	NA	NA
NM_000913	OPRL1	21.0045	-0.501457	0.189794	-2.64211	0.00823911	0.0258175
NM_000914	OPRM1	0	NA	NA	NA	NA	NA
NM_000915	OXT	2.2917	-0.105331	0.111501	-0.944661	0.344832	NA
NM_000916	OXTR	16.8849	-0.0755367	0.187104	-0.403715	0.686422	0.760664
NM_000917	P4HA1	2324.7	-0.475072	0.10119	-4.69486	2.66788e-06	6.81437e-05
NM_000918	P4HB	15517.2	-0.184253	0.0855159	-2.1546	0.0311929	0.0696522
NM_000921	PDE3A	0	NA	NA	NA	NA	NA
NM_000922	PDE3B	1448.82	-0.225775	0.102682	-2.19878	0.0278933	0.0641433
NM_000924	PDE1B	0.16973	0.0203348	0.0324771	0.626128	0.531231	NA
NM_000925	PDHB	1771.81	-0.130833	0.0899345	-1.45476	0.145736	0.228802
NM_000926	PGR	0.6044	0.0767488	0.0621202	1.23549	0.216649	NA
NM_000927	ABCB1	0.43273	0.0504742	0.0506106	0.997306	0.318616	NA
NM_000928	PLA2G1B	0	NA	NA	NA	NA	NA
NM_000929	PLA2G5	0	NA	NA	NA	NA	NA
NM_000930	PLAT	5.46175	-0.0499284	0.155671	-0.32073	0.748415	NA
NM_000932	PLCB3	2788.96	-0.483545	0.0911855	-5.30287	1.13994e-07	6.60479e-06
NM_000933	PLCB4	3.26211	-0.0742567	0.128803	-0.576515	0.564267	NA
NM_000934	SERPINF2	3.57734	-0.116061	0.131094	-0.885331	0.375978	NA
NM_000936	PNLIP	0	NA	NA	NA	NA	NA
NM_000937	POLR2A	7982.71	-0.234501	0.0934869	-2.50838	0.0121285	0.0344453
NM_000938	POLR2B	2645.2	-0.307069	0.0961721	-3.19291	0.00140845	0.0070486
NM_000939	POMC	0.703031	-0.0117319	0.0655792	-0.178897	0.858018	NA
NM_000940	PON3	0.165025	-0.0221846	0.0322425	-0.688056	0.491417	NA
NM_000941	POR	2392.54	-0.270645	0.086568	-3.12639	0.00176969	0.00832811
NM_000942	PPIB	7205.66	-0.147756	0.0862192	-1.71372	0.0865801	0.1523
NM_000943	PPIC	1026.57	-0.258808	0.0978946	-2.64374	0.00819946	0.0257418
NM_000944	PPP3CA	2261.96	-0.288529	0.0924074	-3.12236	0.00179409	0.00840984
NM_000945	PPP3R1	7301.19	-0.16974	0.0974372	-1.74205	0.0814998	0.145564
NM_000946	PRIM1	1293.5	-0.120983	0.0976361	-1.23912	0.215301	0.309553
NM_000947	PRIM2	1330.19	-0.311952	0.103059	-3.02693	0.00247051	0.010603
NM_000948	PRL	0.332885	-0.007319	0.0461538	-0.158578	0.874001	NA
NM_000949	PRLR	0	NA	NA	NA	NA	NA
NM_000951	PRRG2	11.6054	-0.0056899	0.180739	-0.0314812	0.974886	0.981995
NM_000952	PTAFR	3.22546	0.0119981	0.127423	0.0941603	0.924982	NA
NM_000953	PTGDR	0	NA	NA	NA	NA	NA
NM_000954	PTGDS	23.3865	-0.104776	0.1896	-0.552617	0.580526	0.67253
NM_000955	PTGER1	8.43076	-0.205137	0.169676	-1.209	0.226664	0.322004
NM_000956	PTGER2	18.0633	-0.057694	0.189329	-0.30473	0.760572	0.820511
NM_000958	PTGER4	43.3909	-0.168504	0.178602	-0.943461	0.345445	0.450129
NM_000959	PTGFR	0	NA	NA	NA	NA	NA
NM_000960	PTGIR	0.264939	0.0324582	0.040815	0.795252	0.426467	NA
NM_000961	PTGIS	0.911277	-0.0865516	0.0763439	-1.13371	0.256917	NA
NM_000962	PTGS1	0.401593	-0.0550531	0.0502322	-1.09597	0.273091	NA
NM_000963	PTGS2	0	NA	NA	NA	NA	NA
NM_000968	RPL4	43363.4	-0.222284	0.0870858	-2.55247	0.0106962	0.031338
NM_000969	RPL5	14743.3	-0.196903	0.0879643	-2.23844	0.0251923	0.0594486
NM_000971	RPL7	13875.9	-0.185074	0.0899833	-2.05675	0.0397098	0.0836059
NM_000972	RPL7A	14285.7	-0.195397	0.0841784	-2.32123	0.0202745	0.0505332
NM_000975	RPL11	12291.1	-0.139938	0.0883243	-1.58437	0.11311	0.18737
NM_000976	RPL12	11898.7	-0.189782	0.0863688	-2.19734	0.0279963	0.0643355
NM_000978	RPL23	15014.2	-0.165174	0.0875496	-1.88663	0.0592099	0.113314
NM_000980	RPL18A	8091.05	-0.176678	0.0809443	-2.18271	0.0290571	0.0660724
NM_000981	RPL19	22261.4	-0.16139	0.0841132	-1.91872	0.0550199	0.10712
NM_000982	RPL21	5908.15	-0.151893	0.0908847	-1.67127	0.094668	0.163169
NM_000983	RPL22	1966.52	-0.157497	0.101893	-1.54571	0.122176	0.198795
NM_000984	RPL23A	5362.87	-0.203421	0.0957844	-2.12374	0.0336921	0.0739405
NM_000985	RPL17	11975.9	-0.210251	0.0857248	-2.45262	0.0141819	0.038661
NM_000986	RPL24	11334.1	-0.13021	0.0860612	-1.513	0.130281	0.209127
NM_000987	RPL26	6417.88	-0.142311	0.0906026	-1.57071	0.116249	0.191288
NM_000988	RPL27	11002.1	-0.158194	0.0868831	-1.82076	0.0686428	0.126986
NM_000989	RPL30	17793.7	-0.166179	0.0844701	-1.96731	0.0491476	0.0982904
NM_000990	RPL27A	9921.15	-0.1838	0.0837317	-2.19511	0.0281556	0.0645478
NM_000992	RPL29	6876.31	-0.167052	0.0863078	-1.93553	0.0529249	0.103948
NM_000994	RPL32	6914.82	-0.119738	0.0875054	-1.36836	0.171201	0.258936
NM_000996	RPL35A	10930.2	-0.145565	0.0878011	-1.65789	0.0973395	0.166524
NM_000997	RPL37	12183.7	-0.127711	0.0889988	-1.43498	0.151293	0.235608
NM_000998	RPL37A	14080.9	-0.151502	0.0821126	-1.84505	0.0650301	0.121909
NM_000999	RPL38	6881.39	-0.128615	0.094265	-1.3644	0.172441	0.260384
NM_001000	RPL39	363.117	-0.292834	0.110841	-2.64193	0.00824354	0.0258287
NM_001001	RPL36AL	1707.07	-0.18914	0.0993283	-1.90419	0.0568856	0.109859
NM_001001290	SLC2A9	0	NA	NA	NA	NA	NA
NM_001001317	PRSS58	0	NA	NA	NA	NA	NA
NM_001001325	SPINK14	0	NA	NA	NA	NA	NA
NM_001001330	REEP3	4234.21	-0.440805	0.0997771	-4.4179	9.96666e-06	0.000180044
NM_001001331	ATP2B2	0	NA	NA	NA	NA	NA
NM_001001343	FNDC9	0.201177	-0.0258809	0.0347514	-0.744745	0.456426	NA
NM_001001344	ATP2B3	2.72202	0.00473129	0.12196	0.0387936	0.969055	NA
NM_001001346	CLDN20	2.06055	-0.0642059	0.107326	-0.598233	0.549685	NA
NM_001001394	DNAJB3	0	NA	NA	NA	NA	NA
NM_001001395	LMO3	1.52821	-0.00126405	0.0982888	-0.0128606	0.989739	NA
NM_001001410	TSR3	1280.39	-0.240721	0.094542	-2.54618	0.010891	0.0317215
NM_001001411	ZNF676	3.93474	-0.163325	0.141193	-1.15676	0.247372	NA
NM_001001412	CALHM1	0.678306	-0.0144188	0.0672075	-0.214541	0.830125	NA
NM_001001413	GOLGA6L1	0	NA	NA	NA	NA	NA
NM_001001414	NCCRP1	3.42097	0.23505	0.134326	1.74984	0.0801455	NA
NM_001001415	ZNF429	317.183	-0.124617	0.116851	-1.06646	0.286218	0.388498
NM_001001417	TBC1D3B	0.200416	-0.0258074	0.0347035	-0.743654	0.457086	NA
NM_001001418	TBC1D3C	16.1501	-0.237299	0.187877	-1.26305	0.20657	0.299914
NM_001001420	SMAD5	3139.66	-0.319841	0.100179	-3.19268	0.00140959	0.00705195
NM_001001436	C16orf87	570.183	-0.188346	0.103757	-1.81526	0.0694841	0.128217
NM_001001437	CCL3L3	0	NA	NA	NA	NA	NA
NM_001001438	LSS	2170.51	-0.525883	0.097492	-5.39411	6.88625e-08	4.49516e-06
NM_001001479	SLC35E4	16.8658	0.0251189	0.189006	0.1329	0.894272	0.922522
NM_001001480	KRTAP5-5	0	NA	NA	NA	NA	NA
NM_001001481	UBE2W	950.001	-0.260968	0.10503	-2.48471	0.0129659	0.036201
NM_001001502	SNCB	0.663697	-0.0542806	0.0652703	-0.831627	0.40562	NA
NM_001001503	NDUFV3	627.505	-0.195097	0.105899	-1.8423	0.0654318	0.122381
NM_001001520	HDGFRP2	2884.17	-0.37922	0.0872149	-4.3481	1.37319e-05	0.000230772
NM_001001523	RORC	0	NA	NA	NA	NA	NA
NM_001001524	TM6SF2	8.37984	0.0248707	0.168653	0.147467	0.882763	0.914115
NM_001001550	GRB10	598.067	-0.0299323	0.102676	-0.291522	0.770652	0.828009
NM_001001552	LEMD1	0	NA	NA	NA	NA	NA
NM_001001557	GDF6	702.12	-0.385981	0.101436	-3.80517	0.000141707	0.00132086
NM_001001563	TIMM50	2358.34	-0.167528	0.0878718	-1.9065	0.0565849	0.109433
NM_001001575	PDE9A	729.537	-0.260619	0.102867	-2.53355	0.0112913	0.0325908
NM_001001656	OR9A4	0	NA	NA	NA	NA	NA
NM_001001657	OR2Y1	0	NA	NA	NA	NA	NA
NM_001001658	OR9A2	0	NA	NA	NA	NA	NA
NM_001001659	OR2A14	0	NA	NA	NA	NA	NA
NM_001001660	LYRM5	352.739	-0.135313	0.11539	-1.17266	0.240932	0.337811
NM_001001661	ZNF425	358.21	0.0530932	0.113799	0.466551	0.640821	0.724306
NM_001001662	ZNF782	216.286	-0.22992	0.125206	-1.83634	0.0663071	0.123667
NM_001001663	TMEM211	0	NA	NA	NA	NA	NA
NM_001001664	SPOPL	1290.01	-0.193868	0.106746	-1.81617	0.0693437	0.127989
NM_001001665	CYP27C1	4.61974	0.331538	0.143248	2.31443	0.0206443	NA
NM_001001667	OR6V1	0	NA	NA	NA	NA	NA
NM_001001668	ZNF470	507.597	-0.0333588	0.119025	-0.280268	0.779272	0.83496
NM_001001669	ARHGEF37	0.144243	0.0178801	0.0304507	0.587182	0.557081	NA
NM_001001670	SPATA31D1	0	NA	NA	NA	NA	NA
NM_001001671	MAP3K15	248.177	-0.173612	0.12319	-1.4093	0.158745	0.244476
NM_001001673	RNASE9	0	NA	NA	NA	NA	NA
NM_001001674	OR4F15	0	NA	NA	NA	NA	NA
NM_001001676	LCN9	0	NA	NA	NA	NA	NA
NM_001001683	MED11	137.327	-0.0500636	0.137766	-0.363395	0.71631	0.785919
NM_001001694	IL17REL	4.56016	0.0461559	0.146987	0.314013	0.753511	NA
NM_001001709	C9orf170	0	NA	NA	NA	NA	NA
NM_001001710	FAM166A	365.445	-0.0112564	0.113664	-0.0990324	0.921113	0.942236
NM_001001711	DDI1	0	NA	NA	NA	NA	NA
NM_001001712	LCN10	2.67374	0.00134913	0.123617	0.0109138	0.991292	NA
NM_001001713	SH3BGR	126.386	0.113337	0.146611	0.773045	0.439496	0.5437
NM_001001722	CDY2B	0	NA	NA	NA	NA	NA
NM_001001732	CC2D2B	1.68021	0.0634266	0.0975331	0.650308	0.515493	NA
NM_001001734	ATP1A4	0	NA	NA	NA	NA	NA
NM_001001786	BLID	0	NA	NA	NA	NA	NA
NM_001001788	RAET1G	0.16973	0.0203348	0.0324771	0.626128	0.531231	NA
NM_001001790	TOMM5	3307.25	-0.217091	0.094527	-2.2966	0.0216416	0.0530908
NM_001001791	C10orf55	0.879338	0.0152199	0.0373483	0.407513	0.683631	NA
NM_001001794	DENND6B	10.9496	-0.041086	0.179884	-0.228403	0.819333	0.86661
NM_001001795	C8orf82	2373.82	-0.246004	0.0851047	-2.8906	0.00384506	0.0148082
NM_001001802	OR2A42	0	NA	NA	NA	NA	NA
NM_001001821	OR2T34	0	NA	NA	NA	NA	NA
NM_001001824	OR2T27	0	NA	NA	NA	NA	NA
NM_001001827	OR2T35	0	NA	NA	NA	NA	NA
NM_001001850	STX19	1.48211	-0.00588004	0.056966	-0.10322	0.917788	NA
NM_001001851	ITIH5	3.19749	-0.0204089	0.129146	-0.15803	0.874433	NA
NM_001001852	PIM3	1702.65	-0.380034	0.089215	-4.25976	2.04649e-05	0.000306532
NM_001001872	C14orf37	9.96088	0.23674	0.175925	1.34569	0.178403	0.267569
NM_001001874	TPD52L3	0	NA	NA	NA	NA	NA
NM_001001877	HSFY2	0	NA	NA	NA	NA	NA
NM_001001888	VCX3B	0.16973	0.0203348	0.0324771	0.626128	0.531231	NA
NM_001001890	RUNX1	163.889	0.168757	0.136486	1.23644	0.216294	0.310668
NM_001001891	ANO7	127.38	-0.286154	0.140617	-2.03498	0.0418526	0.0870265
NM_001001894	TTC3	12115.8	-0.361726	0.0990584	-3.65164	0.000260571	0.00206803
NM_001001895	UBASH3A	0	NA	NA	NA	NA	NA
NM_001001912	OR4E2	0	NA	NA	NA	NA	NA
NM_001001913	OR52N1	0	NA	NA	NA	NA	NA
NM_001001914	OR2G3	0	NA	NA	NA	NA	NA
NM_001001915	OR2G2	0	NA	NA	NA	NA	NA
NM_001001916	OR52J3	0	NA	NA	NA	NA	NA
NM_001001917	OR56A1	0	NA	NA	NA	NA	NA
NM_001001918	OR14C36	0	NA	NA	NA	NA	NA
NM_001001919	OR13C4	0	NA	NA	NA	NA	NA
NM_001001920	OR4C15	0	NA	NA	NA	NA	NA
NM_001001921	OR5AS1	0	NA	NA	NA	NA	NA
NM_001001922	OR52N5	0	NA	NA	NA	NA	NA
NM_001001923	OR5C1	0	NA	NA	NA	NA	NA
NM_001001925	MTUS1	3222.04	-0.0294705	0.0998402	-0.295177	0.767859	0.826047
NM_001001936	AFAP1L2	3.85386	0.228173	0.138649	1.64569	0.0998273	NA
NM_001001937	ATP5A1	25384.7	-0.213634	0.0870891	-2.45305	0.014165	0.0386238
NM_001001938	C9orf47	0.132469	0.0167661	0.0294891	0.568552	0.56966	NA
NM_001001952	OR5D18	0	NA	NA	NA	NA	NA
NM_001001953	OR10G9	0	NA	NA	NA	NA	NA
NM_001001954	OR5A2	0	NA	NA	NA	NA	NA
NM_001001955	OR4C13	0	NA	NA	NA	NA	NA
NM_001001956	OR13C9	0	NA	NA	NA	NA	NA
NM_001001957	OR2W3	0	NA	NA	NA	NA	NA
NM_001001958	OR7G3	0	NA	NA	NA	NA	NA
NM_001001959	OR11L1	0	NA	NA	NA	NA	NA
NM_001001960	OR5W2	0	NA	NA	NA	NA	NA
NM_001001961	OR13C3	0	NA	NA	NA	NA	NA
NM_001001963	OR2L8	0	NA	NA	NA	NA	NA
NM_001001964	OR2T11	0	NA	NA	NA	NA	NA
NM_001001965	OR4D5	0	NA	NA	NA	NA	NA
NM_001001966	OR14A16	0	NA	NA	NA	NA	NA
NM_001001967	OR5D13	0	NA	NA	NA	NA	NA
NM_001001968	OR6S1	0	NA	NA	NA	NA	NA
NM_001001971	FAM13C	0	NA	NA	NA	NA	NA
NM_001001991	PAMR1	2.53531	0.0305051	0.119398	0.255492	0.798343	NA
NM_001002	RPLP0	37210	-0.198281	0.0813201	-2.43827	0.0147577	0.0398285
NM_001002000	GMPR2	1214.99	-0.299839	0.100381	-2.98701	0.00281723	0.0117135
NM_001002006	NT5C1B	2.77753	0.104898	0.123261	0.851026	0.394755	NA
NM_001002010	NT5C3A	446.017	-0.126611	0.113481	-1.1157	0.264551	0.364029
NM_001002017	HCFC1R1	727.575	-0.16644	0.0998112	-1.66755	0.0954045	0.164037
NM_001002027	ATP5G1	2837.1	-0.262677	0.0865207	-3.036	0.00239741	0.0103832
NM_001002029	C4B	0	NA	NA	NA	NA	NA
NM_001002031	ATP5G2	5195.57	-0.117006	0.090192	-1.2973	0.194528	0.286436
NM_001002034	FAM109B	398.941	-0.116546	0.111769	-1.04274	0.297068	0.400456
NM_001002035	DEFB108B	0	NA	NA	NA	NA	NA
NM_001002036	ASTL	3.12691	0.0104272	0.128037	0.0814389	0.935093	NA
NM_001002231	KLK2	0	NA	NA	NA	NA	NA
NM_001002243	AFTPH	904.361	-0.24195	0.112366	-2.15324	0.0312997	0.069849
NM_001002254	AWAT2	0	NA	NA	NA	NA	NA
NM_001002255	SUMO4	2.13214	-0.0448157	0.108655	-0.412459	0.680003	NA
NM_001002257	LCLAT1	577.471	-0.0912303	0.10728	-0.850394	0.395106	0.499957
NM_001002262	ZFYVE27	571.372	-0.150908	0.107415	-1.4049	0.16005	0.246054
NM_001002264	EPSTI1	0	NA	NA	NA	NA	NA
NM_001002266	2008-03-01	758.735	-0.103674	0.104671	-0.990473	0.321943	0.426551
NM_001002273	FCGR2B	0	NA	NA	NA	NA	NA
NM_001002292	WLS	1618.83	-0.385575	0.099766	-3.8648	0.000111181	0.00109234
NM_001002294	FMO3	0	NA	NA	NA	NA	NA
NM_001002295	GATA3	952.912	-0.171205	0.0983483	-1.74081	0.0817175	0.145875
NM_001002296	GOLGA7	1817.72	-0.353366	0.0963192	-3.6687	0.000243788	0.00197789
NM_001002755	NFU1	1167.57	-0.155146	0.111384	-1.3929	0.16365	0.250225
NM_001002758	PRY2	0	NA	NA	NA	NA	NA
NM_001002759	SFR1	309.963	-0.126665	0.124051	-1.02108	0.307218	0.411437
NM_001002760	BPY2B	0	NA	NA	NA	NA	NA
NM_001002761	BPY2C	0	NA	NA	NA	NA	NA
NM_001002796	MCTP1	19.433	0.0875192	0.1894	0.462088	0.644018	0.726769
NM_001002814	RAB11FIP1	2806.39	-0.179675	0.100998	-1.77899	0.0752411	0.136564
NM_001002836	ZNF787	1027.74	-0.185352	0.0948137	-1.95491	0.0505941	0.100472
NM_001002837	INPP5J	3.429	-0.0951892	0.134399	-0.708257	0.478786	NA
NM_001002838	WNK3	366.333	-0.339515	0.121524	-2.79382	0.00520902	0.0184061
NM_001002841	MYL4	0.34542	-0.00643313	0.0467701	-0.137548	0.890598	NA
NM_001002843	ZNF280D	806.566	-0.277474	0.113193	-2.45135	0.0142323	0.0387737
NM_001002862	DERL3	47.281	-0.161611	0.178704	-0.904348	0.365811	0.470434
NM_001002877	THOC5	1503.11	-0.327511	0.0928356	-3.52786	0.000418939	0.00289931
NM_001002880	CBY1	238.246	-0.245503	0.129105	-1.90157	0.0572275	0.110446
NM_001002901	FCRLB	0.839146	0.0640318	0.0723802	0.884659	0.37634	NA
NM_001002905	OR8G1	3.72245	0.266346	0.134029	1.98723	0.0468971	NA
NM_001002906	XKRY2	0	NA	NA	NA	NA	NA
NM_001002907	OR8K1	0	NA	NA	NA	NA	NA
NM_001002911	GPR139	0	NA	NA	NA	NA	NA
NM_001002912	ERICH3	0	NA	NA	NA	NA	NA
NM_001002913	PTRH1	125.692	-0.0964385	0.142854	-0.675083	0.499623	0.60054
NM_001002914	KCTD11	177.916	-0.0572442	0.131656	-0.4348	0.663707	0.74252
NM_001002915	IGFL2	0	NA	NA	NA	NA	NA
NM_001002916	H2BFWT	0	NA	NA	NA	NA	NA
NM_001002917	OR8D1	0.370146	-0.00456649	0.0479151	-0.0953039	0.924073	NA
NM_001002918	OR8D2	0.34542	-0.00643313	0.0467701	-0.137548	0.890598	NA
NM_001002919	FAM150B	3.39779	0.118848	0.129648	0.916693	0.359304	NA
NM_001002920	POTEA	0	NA	NA	NA	NA	NA
NM_001002923	IGFL4	1.25074	-0.0401208	0.0879958	-0.45594	0.648433	NA
NM_001002925	OR5AP2	0	NA	NA	NA	NA	NA
NM_001002926	TWISTNB	4050.08	-0.260315	0.0926834	-2.80865	0.00497499	0.0178
NM_001003	RPLP1	26930.9	-0.172914	0.0829251	-2.08518	0.0370526	0.079415
NM_001003395	TPD52L1	0.696253	-0.0943482	0.0652297	-1.4464	0.148066	NA
NM_001003406	CACNA1I	1.18951	-0.0419406	0.0840863	-0.49878	0.617934	NA
NM_001003408	ABLIM1	2404.62	-0.459403	0.100321	-4.57935	4.66427e-06	0.000101638
NM_001003443	OR56A3	0	NA	NA	NA	NA	NA
NM_001003652	SMAD2	4267.8	-0.28698	0.0928755	-3.08994	0.00200196	0.00911742
NM_001003665	C1orf95	0.662936	-0.0542229	0.065249	-0.831015	0.405965	NA
NM_001003676	C11orf49	213.574	-0.406743	0.129228	-3.14747	0.00164688	0.00791461
NM_001003688	SMAD1	921.152	-0.10477	0.0980687	-1.06833	0.285371	0.387489
NM_001003690	MAD2L1BP	472.069	-0.0433749	0.106953	-0.40555	0.685073	0.75931
NM_001003693	LY6G6F	0	NA	NA	NA	NA	NA
NM_001003694	BRPF1	911.252	0.0396531	0.103647	0.382578	0.702033	0.773951
NM_001003697	ATP5J	3630.6	-0.132573	0.0892771	-1.48496	0.137555	0.21818
NM_001003700	RREB1	1870.53	-0.219087	0.0979148	-2.23752	0.0252521	0.0595396
NM_001003702	ARHGEF35	0	NA	NA	NA	NA	NA
NM_001003712	OSBPL8	4179.45	-0.437561	0.0998168	-4.38364	1.16712e-05	0.000203459
NM_001003713	ATP5J2	2555.15	-0.120839	0.0865591	-1.39603	0.162706	0.249262
NM_001003745	OR10A3	0	NA	NA	NA	NA	NA
NM_001003750	OR8I2	0	NA	NA	NA	NA	NA
NM_001003760	KLHL31	9.42585	-0.11202	0.172857	-0.648053	0.516951	0.616528
NM_001003785	ATP5H	2980.74	-0.0996848	0.0910683	-1.09462	0.273685	0.374507
NM_001003791	ERLIN2	1088.73	-0.143149	0.105768	-1.35342	0.17592	0.264389
NM_001003794	MGLL	2.03714	-0.0307976	0.109806	-0.280473	0.779114	NA
NM_001003795	GTF2IRD2B	13.3384	-0.143654	0.184048	-0.780521	0.435084	0.539189
NM_001003796	NHP2L1	2619.14	-0.270135	0.0926315	-2.91623	0.00354287	0.013959
NM_001003799	TARP	0	NA	NA	NA	NA	NA
NM_001003802	SMARCD3	1328.46	-0.0658164	0.0919556	-0.715741	0.474151	0.576248
NM_001003809	DLGAP1	0	NA	NA	NA	NA	NA
NM_001003811	TEX11	0	NA	NA	NA	NA	NA
NM_001003818	TRIM6	137.858	-0.497313	0.141746	-3.50849	0.000450658	0.0030621
NM_001003819	TRIM6-TRIM34	170.843	-0.39386	0.131231	-3.00127	0.0026886	0.0113149
NM_001003827	TRIM34	119.79	-0.309835	0.144034	-2.15112	0.0314669	0.0701331
NM_001003841	SLC6A19	10.2864	0.269667	0.176577	1.52719	0.126714	0.204655
NM_001003845	SP5	4.1741	0.0758103	0.141369	0.536257	0.591781	NA
NM_001003892	DUPD1	0	NA	NA	NA	NA	NA
NM_001003894	CDY1B	0	NA	NA	NA	NA	NA
NM_001003927	EVI2A	0.911798	0.0709854	0.0775335	0.915545	0.359906	NA
NM_001003931	PARP3	330.951	-0.0210182	0.116768	-0.18	0.857153	0.895096
NM_001003936	TXNDC8	0	NA	NA	NA	NA	NA
NM_001003937	TSPYL6	0	NA	NA	NA	NA	NA
NM_001003938	HBM	0.165025	-0.0221846	0.0322425	-0.688056	0.491417	NA
NM_001003942	BMF	27.7878	-0.13732	0.188682	-0.727787	0.466744	0.569117
NM_001003954	ANXA13	0.144243	0.0178801	0.0304507	0.587182	0.557081	NA
NM_001003962	CAPNS1	11593.5	-0.182827	0.0861687	-2.12174	0.0338598	0.0742161
NM_001004	RPLP2	9217.93	-0.180147	0.0788297	-2.28527	0.022297	0.0541853
NM_001004019	FBLN2	1.0442	0.0919486	0.081754	1.1247	0.260717	NA
NM_001004051	GPRASP2	915.533	-0.130451	0.112911	-1.15534	0.24795	0.345704
NM_001004052	OR52B2	0	NA	NA	NA	NA	NA
NM_001004058	OR8K5	0	NA	NA	NA	NA	NA
NM_001004059	OR4S2	0	NA	NA	NA	NA	NA
NM_001004060	NOMO2	359.671	-0.369866	0.119155	-3.10407	0.00190881	0.00882037
NM_001004063	OR4K1	0	NA	NA	NA	NA	NA
NM_001004064	OR8J3	0	NA	NA	NA	NA	NA
NM_001004065	AKAP2	1.2197	0.00254878	0.0842762	0.0302432	0.975873	NA
NM_001004067	NOMO3	156.964	-0.165693	0.132784	-1.24784	0.21209	0.305996
NM_001004106	GRK6	762.384	-0.388462	0.0989769	-3.92478	8.681e-05	0.00091547
NM_001004124	OR4P4	0	NA	NA	NA	NA	NA
NM_001004125	TUSC1	0.747775	-0.021	0.0409342	-0.513018	0.607939	NA
NM_001004127	ALG11	915.186	-0.251478	0.109351	-2.29974	0.0214629	0.0527852
NM_001004128	QSOX1	2192.49	-0.235726	0.0856718	-2.7515	0.00593226	0.0203194
NM_001004134	OR10AD1	0	NA	NA	NA	NA	NA
NM_001004135	OR2A12	0	NA	NA	NA	NA	NA
NM_001004136	OR2T2	0	NA	NA	NA	NA	NA
NM_001004137	OR52M1	0	NA	NA	NA	NA	NA
NM_001004195	OR4F4	0	NA	NA	NA	NA	NA
NM_001004196	CD200	0	NA	NA	NA	NA	NA
NM_001004297	OR13A1	0.132469	0.0167661	0.0294891	0.568552	0.56966	NA
NM_001004298	C10orf90	0	NA	NA	NA	NA	NA
NM_001004301	ZNF813	465.267	-0.30451	0.116353	-2.61712	0.00886764	0.0272725
NM_001004303	C1orf168	0	NA	NA	NA	NA	NA
NM_001004304	ZNF740	1647.09	-0.123234	0.0953117	-1.29295	0.196027	0.288133
NM_001004306	CCDC144NL	0.144243	0.0178801	0.0304507	0.587182	0.557081	NA
NM_001004308	ZCCHC16	0	NA	NA	NA	NA	NA
NM_001004309	ZNF774	50.9117	-0.055288	0.174373	-0.317066	0.751193	0.812916
NM_001004310	FCRL6	0	NA	NA	NA	NA	NA
NM_001004311	FIGLA	0	NA	NA	NA	NA	NA
NM_001004312	RTP2	0	NA	NA	NA	NA	NA
NM_001004313	TMEM220	93.0191	0.0481124	0.154737	0.310931	0.755853	0.816751
NM_001004316	LEKR1	0.365441	-0.0516408	0.0487104	-1.06016	0.289073	NA
NM_001004317	LIN28B	0.478999	0.0175425	0.0567009	0.309386	0.757028	NA
NM_001004318	PAPL	1.9785	-0.0398261	0.0980907	-0.406013	0.684733	NA
NM_001004319	VHLL	0.313974	0.0410896	0.0459681	0.893871	0.371391	NA
NM_001004320	AGMO	0.51439	0.0151811	0.0579319	0.262052	0.793282	NA
NM_001004323	C7orf61	10.3378	-0.500938	0.177299	-2.82538	0.00472249	0.0171283
NM_001004325	KRTAP5-2	0.132469	0.0167661	0.0294891	0.568552	0.56966	NA
NM_001004328	ZNF705A	1.55419	-0.0951069	0.0978363	-0.972103	0.330999	NA
NM_001004329	DBX2	0.264939	0.0324582	0.040815	0.795252	0.426467	NA
NM_001004330	PLEKHG7	0	NA	NA	NA	NA	NA
NM_001004333	RNASEK	1367.43	-0.265705	0.0896093	-2.96515	0.00302536	0.0123869
NM_001004334	GPR179	1.74547	-0.118405	0.103256	-1.14672	0.251499	NA
NM_001004339	ZYG11A	474.305	-0.422238	0.116924	-3.61123	0.00030475	0.00230895
NM_001004340	FCGR1B	0	NA	NA	NA	NA	NA
NM_001004341	ETV3L	0.144243	0.0178801	0.0304507	0.587182	0.557081	NA
NM_001004342	TRIM67	5.76192	0.0278187	0.157025	0.177161	0.859382	NA
NM_001004343	MAP1LC3C	0	NA	NA	NA	NA	NA
NM_001004351	SPDYE3	61.0252	-0.107901	0.171669	-0.628543	0.529648	0.62792
NM_001004352	LOC100506422	0	NA	NA	NA	NA	NA
NM_001004354	NRARP	968.641	-0.708559	0.10103	-7.01334	2.32691e-12	1.24228e-09
NM_001004358	FGFRL1	2897.41	-0.0683855	0.0845393	-0.80892	0.418561	0.523105
NM_001004360	DPP10	0	NA	NA	NA	NA	NA
NM_001004416	UMODL1	0	NA	NA	NA	NA	NA
NM_001004419	CLEC2D	80.9375	-0.0764352	0.158526	-0.482161	0.629691	0.714907
NM_001004431	METRNL	2196.03	-0.0120014	0.0881881	-0.136089	0.891751	0.920637
NM_001004432	LINGO4	0.132469	0.0167661	0.0294891	0.568552	0.56966	NA
NM_001004434	SLC30A2	1.46002	0.191687	0.0951509	2.01456	0.0439504	NA
NM_001004439	ITGA11	1.44066	0.0795457	0.091313	0.871132	0.383682	NA
NM_001004440	FAM19A3	0	NA	NA	NA	NA	NA
NM_001004441	ANKRD34B	1.6219	0.0141133	0.0985052	0.143274	0.886073	NA
NM_001004450	OR1B1	0	NA	NA	NA	NA	NA
NM_001004451	OR1J1	0	NA	NA	NA	NA	NA
NM_001004452	OR1J4	0	NA	NA	NA	NA	NA
NM_001004453	OR1L6	0	NA	NA	NA	NA	NA
NM_001004454	OR1L8	0	NA	NA	NA	NA	NA
NM_001004456	OR1M1	0	NA	NA	NA	NA	NA
NM_001004457	OR1N2	0	NA	NA	NA	NA	NA
NM_001004458	OR1S1	0	NA	NA	NA	NA	NA
NM_001004459	OR1S2	0	NA	NA	NA	NA	NA
NM_001004460	OR10A2	0.429964	0.0124275	0.0522281	0.237947	0.811922	NA
NM_001004461	OR10A6	0	NA	NA	NA	NA	NA
NM_001004462	OR10G4	0	NA	NA	NA	NA	NA
NM_001004463	OR10G7	0	NA	NA	NA	NA	NA
NM_001004464	OR10G8	0	NA	NA	NA	NA	NA
NM_001004465	OR10H4	0	NA	NA	NA	NA	NA
NM_001004466	OR10H5	0	NA	NA	NA	NA	NA
NM_001004467	OR10J3	0	NA	NA	NA	NA	NA
NM_001004469	OR10J5	0	NA	NA	NA	NA	NA
NM_001004470	ST8SIA6	0.829124	0.0538388	0.0714781	0.753221	0.451317	NA
NM_001004471	OR10Q1	0	NA	NA	NA	NA	NA
NM_001004472	OR10R2	0	NA	NA	NA	NA	NA
NM_001004473	OR10K1	0	NA	NA	NA	NA	NA
NM_001004474	OR10S1	0	NA	NA	NA	NA	NA
NM_001004475	OR10T2	0	NA	NA	NA	NA	NA
NM_001004476	OR10K2	0	NA	NA	NA	NA	NA
NM_001004477	OR10X1	0	NA	NA	NA	NA	NA
NM_001004478	OR10Z1	0	NA	NA	NA	NA	NA
NM_001004479	OR11H4	0.132469	0.0167661	0.0294891	0.568552	0.56966	NA
NM_001004480	OR11H6	0	NA	NA	NA	NA	NA
NM_001004481	OR13C2	0	NA	NA	NA	NA	NA
NM_001004482	OR13C5	0	NA	NA	NA	NA	NA
NM_001004483	OR13C8	0	NA	NA	NA	NA	NA
NM_001004484	OR13D1	0	NA	NA	NA	NA	NA
NM_001004485	OR13F1	0	NA	NA	NA	NA	NA
NM_001004486	OR13H1	0	NA	NA	NA	NA	NA
NM_001004487	OR13J1	0	NA	NA	NA	NA	NA
NM_001004488	OR2A25	0	NA	NA	NA	NA	NA
NM_001004489	OR2AG1	0	NA	NA	NA	NA	NA
NM_001004490	OR2AG2	5.20108	0.00175343	0.150933	0.0116173	0.990731	NA
NM_001004491	OR2AK2	0	NA	NA	NA	NA	NA
NM_001004492	OR2B11	0	NA	NA	NA	NA	NA
NM_001004684	OR2D3	0.401593	-0.0550531	0.0502322	-1.09597	0.273091	NA
NM_001004685	OR2F2	0	NA	NA	NA	NA	NA
NM_001004686	OR2L2	0	NA	NA	NA	NA	NA
NM_001004687	OR2L3	0	NA	NA	NA	NA	NA
NM_001004688	OR2M2	0	NA	NA	NA	NA	NA
NM_001004689	OR2M3	0	NA	NA	NA	NA	NA
NM_001004690	OR2M5	0	NA	NA	NA	NA	NA
NM_001004691	OR2M7	0	NA	NA	NA	NA	NA
NM_001004692	OR2T12	0	NA	NA	NA	NA	NA
NM_001004693	OR2T10	0	NA	NA	NA	NA	NA
NM_001004694	OR2T29	0	NA	NA	NA	NA	NA
NM_001004695	OR2T33	0	NA	NA	NA	NA	NA
NM_001004696	OR2T4	0	NA	NA	NA	NA	NA
NM_001004697	OR2T5	0	NA	NA	NA	NA	NA
NM_001004698	OR2W5	0	NA	NA	NA	NA	NA
NM_001004699	OR2Z1	0	NA	NA	NA	NA	NA
NM_001004700	OR4C11	0	NA	NA	NA	NA	NA
NM_001004701	OR4C16	0	NA	NA	NA	NA	NA
NM_001004702	OR4C3	0	NA	NA	NA	NA	NA
NM_001004703	OR4C46	0	NA	NA	NA	NA	NA
NM_001004704	OR4C6	0	NA	NA	NA	NA	NA
NM_001004705	OR4D10	0	NA	NA	NA	NA	NA
NM_001004706	OR4D11	0	NA	NA	NA	NA	NA
NM_001004707	OR4D2	0	NA	NA	NA	NA	NA
NM_001004708	OR4D6	0	NA	NA	NA	NA	NA
NM_001004711	OR4D9	0	NA	NA	NA	NA	NA
NM_001004712	OR4K14	0	NA	NA	NA	NA	NA
NM_001004713	OR1I1	0	NA	NA	NA	NA	NA
NM_001004714	OR4K13	0	NA	NA	NA	NA	NA
NM_001004715	OR4K17	0	NA	NA	NA	NA	NA
NM_001004717	OR4L1	0	NA	NA	NA	NA	NA
NM_001004719	OR4M2	0	NA	NA	NA	NA	NA
NM_001004723	OR4N2	0	NA	NA	NA	NA	NA
NM_001004724	OR4N5	0	NA	NA	NA	NA	NA
NM_001004725	OR4S1	0	NA	NA	NA	NA	NA
NM_001004726	OR4X1	0	NA	NA	NA	NA	NA
NM_001004727	OR4X2	0	NA	NA	NA	NA	NA
NM_001004728	OR5A1	0	NA	NA	NA	NA	NA
NM_001004729	OR5AN1	0	NA	NA	NA	NA	NA
NM_001004730	OR5AR1	0	NA	NA	NA	NA	NA
NM_001004731	OR5AU1	0	NA	NA	NA	NA	NA
NM_001004733	OR5B12	0	NA	NA	NA	NA	NA
NM_001004734	OR14I1	0	NA	NA	NA	NA	NA
NM_001004735	OR5D14	0	NA	NA	NA	NA	NA
NM_001004736	OR5K1	0	NA	NA	NA	NA	NA
NM_001004737	OR5K2	0	NA	NA	NA	NA	NA
NM_001004738	OR5L1	0	NA	NA	NA	NA	NA
NM_001004739	OR5L2	0	NA	NA	NA	NA	NA
NM_001004740	OR5M1	0	NA	NA	NA	NA	NA
NM_001004741	OR5M10	0	NA	NA	NA	NA	NA
NM_001004742	OR5M3	0	NA	NA	NA	NA	NA
NM_001004743	OR5M9	0	NA	NA	NA	NA	NA
NM_001004744	OR5R1	0	NA	NA	NA	NA	NA
NM_001004745	OR5T1	0	NA	NA	NA	NA	NA
NM_001004746	OR5T2	0	NA	NA	NA	NA	NA
NM_001004747	OR5T3	0	NA	NA	NA	NA	NA
NM_001004748	OR51A2	0	NA	NA	NA	NA	NA
NM_001004749	OR51A7	0	NA	NA	NA	NA	NA
NM_001004750	OR51B6	0	NA	NA	NA	NA	NA
NM_001004751	OR51D1	0	NA	NA	NA	NA	NA
NM_001004752	OR51F1	0	NA	NA	NA	NA	NA
NM_001004753	OR51F2	0	NA	NA	NA	NA	NA
NM_001004754	OR51I2	0	NA	NA	NA	NA	NA
NM_001004755	OR51L1	0	NA	NA	NA	NA	NA
NM_001004756	OR51M1	0	NA	NA	NA	NA	NA
NM_001004757	OR51Q1	0	NA	NA	NA	NA	NA
NM_001004758	OR51S1	0	NA	NA	NA	NA	NA
NM_001004759	OR51T1	0	NA	NA	NA	NA	NA
NM_001004760	OR51V1	0	NA	NA	NA	NA	NA
NM_001005160	OR52A5	0	NA	NA	NA	NA	NA
NM_001005161	OR52B4	0	NA	NA	NA	NA	NA
NM_001005162	OR52B6	0	NA	NA	NA	NA	NA
NM_001005163	OR52D1	0	NA	NA	NA	NA	NA
NM_001005164	OR52E2	0	NA	NA	NA	NA	NA
NM_001005165	OR52E4	0	NA	NA	NA	NA	NA
NM_001005167	OR52E6	0	NA	NA	NA	NA	NA
NM_001005168	OR52E8	0	NA	NA	NA	NA	NA
NM_001005169	OR52I1	0	NA	NA	NA	NA	NA
NM_001005170	OR52I2	0	NA	NA	NA	NA	NA
NM_001005171	OR52K1	0	NA	NA	NA	NA	NA
NM_001005172	OR52K2	0	NA	NA	NA	NA	NA
NM_001005173	OR52L1	0	NA	NA	NA	NA	NA
NM_001005174	OR52N2	0	NA	NA	NA	NA	NA
NM_001005175	OR52N4	0	NA	NA	NA	NA	NA
NM_001005176	SP140	0.132469	0.0167661	0.0294891	0.568552	0.56966	NA
NM_001005177	OR52R1	0	NA	NA	NA	NA	NA
NM_001005178	OR52W1	0.16973	0.0203348	0.0324771	0.626128	0.531231	NA
NM_001005179	OR56A4	0	NA	NA	NA	NA	NA
NM_001005180	OR56B1	0	NA	NA	NA	NA	NA
NM_001005181	OR56B4	0.132469	0.0167661	0.0294891	0.568552	0.56966	NA
NM_001005182	OR6C1	0	NA	NA	NA	NA	NA
NM_001005183	OR6C76	0	NA	NA	NA	NA	NA
NM_001005184	OR6K6	0	NA	NA	NA	NA	NA
NM_001005185	OR6N1	0	NA	NA	NA	NA	NA
NM_001005186	OR6Q1	0	NA	NA	NA	NA	NA
NM_001005187	OR6T1	0	NA	NA	NA	NA	NA
NM_001005188	OR6X1	0.144243	0.0178801	0.0304507	0.587182	0.557081	NA
NM_001005189	OR6Y1	0	NA	NA	NA	NA	NA
NM_001005190	OR7A10	0	NA	NA	NA	NA	NA
NM_001005191	OR7D4	0	NA	NA	NA	NA	NA
NM_001005192	OR7G1	0	NA	NA	NA	NA	NA
NM_001005193	OR7G2	0	NA	NA	NA	NA	NA
NM_001005194	OR8A1	4.86326	-0.187409	0.149951	-1.2498	0.211371	NA
NM_001005195	OR8B12	0.401593	-0.0550531	0.0502322	-1.09597	0.273091	NA
NM_001005196	OR8B4	0	NA	NA	NA	NA	NA
NM_001005197	OR8D4	0	NA	NA	NA	NA	NA
NM_001005198	OR8G5	8.97548	0.324242	0.173804	1.86556	0.0621031	0.117572
NM_001005199	OR8H1	0	NA	NA	NA	NA	NA
NM_001005200	OR8H2	0	NA	NA	NA	NA	NA
NM_001005201	OR8H3	0	NA	NA	NA	NA	NA
NM_001005202	OR8K3	0	NA	NA	NA	NA	NA
NM_001005203	OR8S1	0	NA	NA	NA	NA	NA
NM_001005204	OR8U1	0	NA	NA	NA	NA	NA
NM_001005205	OR8J1	0	NA	NA	NA	NA	NA
NM_001005207	TRIM37	1630.25	-0.276284	0.10448	-2.64438	0.00818406	0.0257097
NM_001005209	TMEM198	77.3893	0.115105	0.163927	0.70217	0.482573	0.584511
NM_001005210	LRRC55	0	NA	NA	NA	NA	NA
NM_001005211	OR9I1	0	NA	NA	NA	NA	NA
NM_001005212	OR9Q1	0	NA	NA	NA	NA	NA
NM_001005213	OR9G1	0	NA	NA	NA	NA	NA
NM_001005214	LRRC52	0	NA	NA	NA	NA	NA
NM_001005216	OR2J3	0	NA	NA	NA	NA	NA
NM_001005217	FRG2	0	NA	NA	NA	NA	NA
NM_001005218	OR5B21	0	NA	NA	NA	NA	NA
NM_001005221	OR4F29	0	NA	NA	NA	NA	NA
NM_001005224	OR4F3	0	NA	NA	NA	NA	NA
NM_001005226	OR2B3	0	NA	NA	NA	NA	NA
NM_001005234	OR1L3	0	NA	NA	NA	NA	NA
NM_001005235	OR1L4	0	NA	NA	NA	NA	NA
NM_001005236	OR1L1	0	NA	NA	NA	NA	NA
NM_001005237	OR51G1	0	NA	NA	NA	NA	NA
NM_001005238	OR51G2	0	NA	NA	NA	NA	NA
NM_001005239	OR11H1	0	NA	NA	NA	NA	NA
NM_001005240	OR4F17	0	NA	NA	NA	NA	NA
NM_001005241	OR4N4	0	NA	NA	NA	NA	NA
NM_001005242	PKP2	316.574	-0.623531	0.117624	-5.30107	1.15129e-07	6.63201e-06
NM_001005243	OR9K2	0	NA	NA	NA	NA	NA
NM_001005245	OR5M11	0	NA	NA	NA	NA	NA
NM_001005270	OR4C12	0	NA	NA	NA	NA	NA
NM_001005272	OR4A5	0	NA	NA	NA	NA	NA
NM_001005274	OR4A16	0	NA	NA	NA	NA	NA
NM_001005275	OR4A15	0	NA	NA	NA	NA	NA
NM_001005276	OR2AE1	0.16973	0.0203348	0.0324771	0.626128	0.531231	NA
NM_001005277	OR4F16	0	NA	NA	NA	NA	NA
NM_001005278	OR6N2	0	NA	NA	NA	NA	NA
NM_001005279	OR6K2	0	NA	NA	NA	NA	NA
NM_001005280	OR10A7	0	NA	NA	NA	NA	NA
NM_001005281	OR6B1	0	NA	NA	NA	NA	NA
NM_001005282	OR5M8	0	NA	NA	NA	NA	NA
NM_001005283	OR9Q2	0	NA	NA	NA	NA	NA
NM_001005284	OR9G4	0	NA	NA	NA	NA	NA
NM_001005285	OR2AT4	0	NA	NA	NA	NA	NA
NM_001005286	OR6F1	0	NA	NA	NA	NA	NA
NM_001005287	OR2A1	0	NA	NA	NA	NA	NA
NM_001005288	OR51I1	0	NA	NA	NA	NA	NA
NM_001005289	OR52H1	0	NA	NA	NA	NA	NA
NM_001005290	PSRC1	981.574	-0.14529	0.0948206	-1.53226	0.125458	0.202901
NM_001005291	SREBF1	3952.77	-0.457622	0.0829954	-5.51382	3.51133e-08	2.59847e-06
NM_001005323	OR5AK2	0	NA	NA	NA	NA	NA
NM_001005324	OR10V1	0	NA	NA	NA	NA	NA
NM_001005325	OR6M1	0	NA	NA	NA	NA	NA
NM_001005326	OR4F6	0	NA	NA	NA	NA	NA
NM_001005327	OR6K3	0	NA	NA	NA	NA	NA
NM_001005328	OR2A7	0	NA	NA	NA	NA	NA
NM_001005329	OR51A4	0	NA	NA	NA	NA	NA
NM_001005338	OR5H1	0	NA	NA	NA	NA	NA
NM_001005339	RGS10	1903.9	-0.0891878	0.0923202	-0.96607	0.334009	0.438612
NM_001005340	GPNMB	1.01306	-0.017535	0.0832929	-0.210522	0.83326	NA
NM_001005353	AK4	10.3081	0.0304915	0.177235	0.17204	0.863406	0.899698
NM_001005356	POTEG	0	NA	NA	NA	NA	NA
NM_001005362	DNM2	3964.86	-0.230813	0.0848659	-2.71973	0.00653344	0.0217541
NM_001005367	TTYH1	10.3346	0.0654218	0.179368	0.364735	0.715309	0.785119
NM_001005369	MTIF2	2439.57	-0.225848	0.095277	-2.37044	0.0177669	0.0458036
NM_001005375	DAZ4	0	NA	NA	NA	NA	NA
NM_001005388	NFASC	8.27368	-0.0263172	0.167755	-0.156879	0.87534	0.908556
NM_001005404	YPEL2	103.606	-0.143015	0.151801	-0.942121	0.34613	0.450846
NM_001005405	KRTAP5-11	0	NA	NA	NA	NA	NA
NM_001005408	NEURL4	1425.8	-0.18084	0.0938295	-1.92732	0.0539396	0.105477
NM_001005413	ZWINT	3356.04	-0.170019	0.0884133	-1.92301	0.0544793	0.106296
NM_001005417	B4GALT2	2030.42	-0.215604	0.0844151	-2.5541	0.0106464	0.031239
NM_001005463	EBF3	4442.09	0.080279	0.0893829	0.898147	0.369107	0.473809
NM_001005464	HIST2H3A	0	NA	NA	NA	NA	NA
NM_001005465	OR10G3	0	NA	NA	NA	NA	NA
NM_001005466	OR10G2	0	NA	NA	NA	NA	NA
NM_001005467	OR8B3	0	NA	NA	NA	NA	NA
NM_001005468	OR8B2	0	NA	NA	NA	NA	NA
NM_001005469	OR5B3	0	NA	NA	NA	NA	NA
NM_001005470	OR4B1	0	NA	NA	NA	NA	NA
NM_001005471	OR2T6	0	NA	NA	NA	NA	NA
NM_001005473	PLCXD3	0	NA	NA	NA	NA	NA
NM_001005474	NFKBIZ	7.48336	0.0248716	0.167692	0.148317	0.882092	NA
NM_001005479	OR5H6	0	NA	NA	NA	NA	NA
NM_001005480	OR2A2	0	NA	NA	NA	NA	NA
NM_001005482	OR5H2	0	NA	NA	NA	NA	NA
NM_001005483	OR4K5	0	NA	NA	NA	NA	NA
NM_001005484	OR4F5	0	NA	NA	NA	NA	NA
NM_001005486	OR4K15	0	NA	NA	NA	NA	NA
NM_001005487	OR13G1	0	NA	NA	NA	NA	NA
NM_001005489	OR5B17	0	NA	NA	NA	NA	NA
NM_001005490	OR6C74	0	NA	NA	NA	NA	NA
NM_001005491	OR10AG1	0	NA	NA	NA	NA	NA
NM_001005492	OR5J2	0	NA	NA	NA	NA	NA
NM_001005493	OR6C6	0	NA	NA	NA	NA	NA
NM_001005494	OR6C4	0	NA	NA	NA	NA	NA
NM_001005495	OR2T3	0	NA	NA	NA	NA	NA
NM_001005496	OR5D16	0	NA	NA	NA	NA	NA
NM_001005497	OR6C75	0	NA	NA	NA	NA	NA
NM_001005498	RHBDF2	477.274	-0.463077	0.103407	-4.47818	7.52827e-06	0.000147299
NM_001005499	OR6C70	0	NA	NA	NA	NA	NA
NM_001005500	OR4M1	0	NA	NA	NA	NA	NA
NM_001005501	OR4K2	0	NA	NA	NA	NA	NA
NM_001005502	CPM	1.79547	-0.0739582	0.100957	-0.732572	0.463819	NA
NM_001005503	OR11G2	0	NA	NA	NA	NA	NA
NM_001005504	OR4F21	0	NA	NA	NA	NA	NA
NM_001005505	CACNA2D2	14.5505	0.0310969	0.186145	0.167058	0.867325	0.902296
NM_001005512	OR4A47	0	NA	NA	NA	NA	NA
NM_001005513	OR4C45	0	NA	NA	NA	NA	NA
NM_001005514	OR5H14	0	NA	NA	NA	NA	NA
NM_001005515	OR5H15	0	NA	NA	NA	NA	NA
NM_001005516	OR5K3	0	NA	NA	NA	NA	NA
NM_001005517	OR5K4	0	NA	NA	NA	NA	NA
NM_001005518	OR6C65	0	NA	NA	NA	NA	NA
NM_001005519	OR6C68	0	NA	NA	NA	NA	NA
NM_001005522	OR2T8	0	NA	NA	NA	NA	NA
NM_001005526	SF3B1	1386.21	-0.319293	0.103057	-3.09821	0.00194691	0.00893292
NM_001005527	FAM19A4	590.172	-0.019688	0.107105	-0.18382	0.854155	0.892578
NM_001005566	OR5B2	0	NA	NA	NA	NA	NA
NM_001005567	OR51B5	3.12831	-0.00178767	0.125673	-0.0142248	0.988651	NA
NM_001005609	EDA	5.81987	0.172066	0.152538	1.12802	0.259311	NA
NM_001005731	ITGB4	20.3517	-0.219629	0.189769	-1.15735	0.24713	0.344867
NM_001005738	FPR2	0.132469	0.0167661	0.0294891	0.568552	0.56966	NA
NM_001005739	VPS54	1341.35	-0.343411	0.100368	-3.42153	0.000622706	0.00388013
NM_001005741	GBA	675.003	-0.120171	0.111049	-1.08215	0.279188	0.380719
NM_001005745	NUMB	1317.27	-0.402263	0.0932963	-4.31167	1.62027e-05	0.000258125
NM_001005746	CACNB4	699.503	-0.494934	0.1042	-4.74986	2.03553e-06	5.55764e-05
NM_001005751	FAM21A	616.781	-0.315558	0.111268	-2.83601	0.00456803	0.0167695
NM_001005752	GJB3	1.47842	-0.00480961	0.0969366	-0.0496161	0.960428	NA
NM_001005783	HAO2	0.165025	-0.0221846	0.0322425	-0.688056	0.491417	NA
NM_001005785	DAZ2	0	NA	NA	NA	NA	NA
NM_001005849	SUMO2	3955.29	-0.176272	0.0890631	-1.97918	0.0477957	0.0963162
NM_001005850	ZNF835	0	NA	NA	NA	NA	NA
NM_001005851	ZNF780B	340.086	-0.27438	0.124388	-2.20583	0.0273956	0.0633447
NM_001005853	OR6B2	0	NA	NA	NA	NA	NA
NM_001005861	RYK	3086.19	-0.461944	0.0943953	-4.89372	9.89471e-07	3.28709e-05
NM_001005920	JMJD8	3602.2	-0.160906	0.0836544	-1.92346	0.0544228	0.10622
NM_001005922	KRTAP5-1	0.165025	-0.0221846	0.0322425	-0.688056	0.491417	NA
NM_001006114	YBEY	572.688	-0.172119	0.101431	-1.6969	0.0897153	0.15648
NM_001006117	RBMY1J	0	NA	NA	NA	NA	NA
NM_001006118	RBMY1E	0	NA	NA	NA	NA	NA
NM_001006120	RBMY1D	0	NA	NA	NA	NA	NA
NM_001006121	RBMY1B	0	NA	NA	NA	NA	NA
NM_001006600	ERBB2IP	4676.44	-0.33884	0.099453	-3.40704	0.000656715	0.00403997
NM_001006607	LRRC37A2	25.1713	-0.382226	0.188996	-2.02241	0.0431345	0.0890418
NM_001006610	SIAH1	609.317	-0.197397	0.104387	-1.89101	0.0586233	0.112437
NM_001006613	WBP5	2152.88	-0.200862	0.100137	-2.00587	0.0448704	0.0918451
NM_001006616	TSPAN17	371.287	-0.167865	0.118646	-1.41484	0.157116	0.242492
NM_001006622	WDR33	1168.23	-0.236861	0.102922	-2.30137	0.021371	0.0526257
NM_001006624	PDPN	0	NA	NA	NA	NA	NA
NM_001006634	ARHGAP17	1333.69	-0.246111	0.0942106	-2.61235	0.00899217	0.0275648
NM_001006638	RAB37	10.3663	-0.251029	0.176168	-1.42494	0.154175	0.239112
NM_001006655	FAM149A	0	NA	NA	NA	NA	NA
NM_001006656	ZNF473	590.744	-0.161148	0.099439	-1.62057	0.105109	0.176624
NM_001006657	WDR35	956.066	-0.233121	0.107973	-2.15905	0.0308459	0.0690115
NM_001006658	CR2	0	NA	NA	NA	NA	NA
NM_001006665	RPS6KA1	875.032	-0.449815	0.094594	-4.75522	1.9823e-06	5.44214e-05
NM_001006666	APOBEC3F	0.200416	-0.0258074	0.0347035	-0.743654	0.457086	NA
NM_001006681	SPIN2B	55.7651	-0.256256	0.174657	-1.4672	0.142322	0.224633
NM_001006684	TCEAL8	1181.24	-0.145397	0.110566	-1.31503	0.188501	0.279309
NM_001006932	RPS6KA2	2.73102	-0.03772	0.123503	-0.305417	0.760049	NA
NM_001006933	TCEAL3	632.506	-0.316718	0.103516	-3.05962	0.00221619	0.00979929
NM_001006935	TCEAL4	1869.39	-0.188497	0.0912714	-2.06523	0.0389009	0.0822911
NM_001006938	TCEAL6	0.545836	-0.033545	0.0591774	-0.566854	0.570813	NA
NM_001006939	LRRC18	0	NA	NA	NA	NA	NA
NM_001006943	EPHA8	2.33539	-0.0361049	0.11762	-0.306962	0.758872	NA
NM_001006944	RPS6KA4	1500.22	-0.187207	0.0919381	-2.03623	0.0417277	0.0868151
NM_001006947	UHRF1BP1L	443.639	-0.0874249	0.117495	-0.744074	0.456831	0.559849
NM_001007	RPS4X	20940.6	-0.18875	0.0831093	-2.27111	0.0231404	0.0556803
NM_001007025	GOSR1	1287.57	-0.0828235	0.0963506	-0.859606	0.390006	0.494617
NM_001007027	ALG8	1346.28	-0.328814	0.107618	-3.05538	0.00224776	0.00989128
NM_001007033	CLEC6A	0	NA	NA	NA	NA	NA
NM_001007067	SDCBP	4896.25	-0.33371	0.0942729	-3.53983	0.00040039	0.00280208
NM_001007089	RESP18	0	NA	NA	NA	NA	NA
NM_001007090	C8orf48	0.879173	0.115712	0.0754984	1.53264	0.125363	NA
NM_001007097	NTRK2	0	NA	NA	NA	NA	NA
NM_001007098	SCP2	440.724	-0.370959	0.119961	-3.09234	0.00198586	0.00906706
NM_001007101	ZNF484	0	NA	NA	NA	NA	NA
NM_001007102	L3MBTL3	363.012	-0.239947	0.122815	-1.95373	0.0507335	0.100676
NM_001007122	FSD2	132.35	-0.114219	0.145894	-0.782889	0.433692	0.537633
NM_001007125	LKAAEAR1	1.68617	0.019389	0.101901	0.190274	0.849095	NA
NM_001007156	NTRK3	0	NA	NA	NA	NA	NA
NM_001007176	C8orf22	0.144243	0.0178801	0.0304507	0.587182	0.557081	NA
NM_001007189	IGIP	30.9779	-0.035477	0.187318	-0.189394	0.849784	0.889348
NM_001007214	CACYBP	3915.72	-0.33586	0.0886211	-3.78984	0.000150745	0.00138203
NM_001007227	SPOP	2741.71	-0.298236	0.0961255	-3.10257	0.00191848	0.00885251
NM_001007231	ARHGAP25	0.132469	0.0167661	0.0294891	0.568552	0.56966	NA
NM_001007232	CARD17	0	NA	NA	NA	NA	NA
NM_001007233	ERCC8	338.108	-0.419002	0.123702	-3.38719	0.000706136	0.00427455
NM_001007237	IGSF3	1199.05	-0.524817	0.104443	-5.02492	5.0364e-07	1.91813e-05
NM_001007240	GP2	0	NA	NA	NA	NA	NA
NM_001007248	ZNF599	230.123	-0.117048	0.12443	-0.940675	0.346871	0.451516
NM_001007253	ERV3-1	195.25	-0.0603912	0.129582	-0.466046	0.641183	0.724633
NM_001007255	KLHDC9	16.7124	0.111842	0.188412	0.593601	0.552779	0.648759
NM_001007267	PLA2R1	1.07783	-0.102169	0.0795854	-1.28376	0.199226	NA
NM_001007271	DUSP13	0.653928	-0.0100851	0.0642025	-0.157083	0.875179	NA
NM_001007466	TULP4	478.684	-0.314523	0.105177	-2.99042	0.00278591	0.0116163
NM_001007469	HCST	2.89145	0.040645	0.124013	0.327749	0.743102	NA
NM_001007470	TRPM3	0	NA	NA	NA	NA	NA
NM_001007523	F8A2	2.36653	0.069584	0.116037	0.599673	0.548724	NA
NM_001007524	F8A3	2.36653	0.069584	0.116037	0.599673	0.548724	NA
NM_001007525	NWD1	0.344659	-0.00638157	0.046736	-0.136545	0.89139	NA
NM_001007527	LMBRD2	601.468	-0.275053	0.116668	-2.35758	0.0183945	0.047008
NM_001007530	CDRT15	1.28689	-0.0403537	0.0864155	-0.466973	0.640519	NA
NM_001007531	NKAPL	0	NA	NA	NA	NA	NA
NM_001007532	STH	0	NA	NA	NA	NA	NA
NM_001007533	PPP1R27	2.96764	-0.0412648	0.128116	-0.32209	0.747385	NA
NM_001007534	C3orf56	0	NA	NA	NA	NA	NA
NM_001007537	C1QTNF9B	9.60005	-0.0244371	0.176937	-0.138112	0.890152	0.919397
NM_001007538	SHISA2	47.8337	0.431198	0.182638	2.36095	0.0182283	0.0466944
NM_001007540	CDHR4	0.766273	-0.100286	0.0671379	-1.49374	0.135245	NA
NM_001007544	C1orf186	0	NA	NA	NA	NA	NA
NM_001007551	CT45A5	0	NA	NA	NA	NA	NA
NM_001007559	SS18	3463.03	-0.173274	0.0912451	-1.899	0.0575646	0.11089
NM_001007561	IRGQ	661.097	-0.0392016	0.102582	-0.382148	0.702351	0.774127
NM_001007563	IGFBPL1	17.305	-0.141899	0.189092	-0.750424	0.452999	0.556377
NM_001007595	C2CD4B	0.201177	-0.0258809	0.0347514	-0.744745	0.456426	NA
NM_001007792	NTRK1	11.1042	-0.0287829	0.18144	-0.158636	0.873956	0.90756
NM_001007794	CEPT1	1247.3	-0.505574	0.105449	-4.79447	1.63104e-06	4.6931e-05
NM_001008	RPS4Y1	0	NA	NA	NA	NA	NA
NM_001008211	OPTN	868.596	-0.304555	0.0950607	-3.2038	0.00135629	0.00685181
NM_001008215	COA5	1043.11	-0.339368	0.0954034	-3.5572	0.000374836	0.00267585
NM_001008216	GALE	474.558	-0.20055	0.103116	-1.9449	0.0517868	0.102223
NM_001008218	AMY1B	0	NA	NA	NA	NA	NA
NM_001008219	AMY1C	0	NA	NA	NA	NA	NA
NM_001008220	CPLX2	0	NA	NA	NA	NA	NA
NM_001008221	AMY1A	0	NA	NA	NA	NA	NA
NM_001008222	ZDHHC9	2397.93	-0.419923	0.0922797	-4.55055	5.35058e-06	0.000112336
NM_001008223	C1QL4	30.1193	0.00388153	0.187567	0.0206942	0.98349	0.988183
NM_001008226	FAM154B	15.2423	0.215231	0.187689	1.14674	0.251488	0.349628
NM_001008228	MOG	0.16973	0.0203348	0.0324771	0.626128	0.531231	NA
NM_001008237	TTC32	114.763	-0.133528	0.147677	-0.904185	0.365897	0.470484
NM_001008239	C18orf25	1066.92	-0.235816	0.105079	-2.24418	0.0248208	0.0588335
NM_001008269	TMEM89	1.20371	0.00154539	0.0806839	0.0191536	0.984719	NA
NM_001008270	PRSS37	0.16973	0.0203348	0.0324771	0.626128	0.531231	NA
NM_001008272	TAGLN3	0	NA	NA	NA	NA	NA
NM_001008274	TRIM72	7.04147	-0.044524	0.16532	-0.26932	0.787683	NA
NM_001008387	REG3G	0	NA	NA	NA	NA	NA
NM_001008388	CISD2	813.741	-0.197205	0.103051	-1.91367	0.0556627	0.108054
NM_001008389	UMOD	0	NA	NA	NA	NA	NA
NM_001008390	CGGBP1	3615.9	-0.231697	0.101077	-2.29228	0.0218895	0.0534577
NM_001008391	CCDC73	981.473	-0.216699	0.106152	-2.04141	0.0412105	0.0860221
NM_001008394	EID3	2.86201	0.119608	0.121467	0.984689	0.324777	NA
NM_001008395	LAMTOR4	1268.34	-0.292615	0.0987804	-2.96228	0.00305373	0.0124808
NM_001008397	GPX8	1634.7	-0.254861	0.0989868	-2.5747	0.0100328	0.0298944
NM_001008405	BCAP29	2336.75	-0.0815897	0.102973	-0.792337	0.428164	0.532232
NM_001008409	TTLL9	0.699088	-0.0611267	0.0684929	-0.892453	0.37215	NA
NM_001008410	STEAP3	16.3831	-0.0565832	0.187746	-0.301381	0.763124	0.822322
NM_001008487	SLC41A3	631.265	-0.254777	0.099814	-2.55251	0.0106948	0.031338
NM_001008493	ENAH	14290.7	-0.380163	0.0933254	-4.07353	4.63064e-05	0.000568085
NM_001008494	ISX	0.200416	-0.0258074	0.0347035	-0.743654	0.457086	NA
NM_001008496	PIWIL3	0	NA	NA	NA	NA	NA
NM_001008530	LGMN	888.954	-0.177341	0.0908622	-1.95176	0.0509671	0.101009
NM_001008534	AKAP14	0.996583	-0.0620038	0.0795333	-0.779595	0.435629	NA
NM_001008536	TCHHL1	0.132469	0.0167661	0.0294891	0.568552	0.56966	NA
NM_001008537	KIAA2022	1.17102	0.00441331	0.0864507	0.05105	0.959286	NA
NM_001008540	CXCR4	4.25093	0.191231	0.143097	1.33637	0.181427	NA
NM_001008564	NUPL1	3182.43	-0.285239	0.0938921	-3.03795	0.00238196	0.0103328
NM_001008566	TPST2	237.258	-0.28137	0.127803	-2.20159	0.0276943	0.0638152
NM_001008657	TCOF1	2175.48	-0.489847	0.0958739	-5.10929	3.23375e-07	1.37524e-05
NM_001008660	PICALM	3264.11	-0.369725	0.0990595	-3.73235	0.000189699	0.00165107
NM_001008661	CCBL2	0	NA	NA	NA	NA	NA
NM_001008693	CST9	0	NA	NA	NA	NA	NA
NM_001008695	THAP7	600.512	-0.193508	0.110297	-1.75443	0.0793567	0.142617
NM_001008701	LPHN1	4510.31	-0.209588	0.0868813	-2.41235	0.01585	0.0420636
NM_001008707	EML1	12.4268	0.476843	0.182367	2.61474	0.00892948	0.0274175
NM_001008708	CHAC2	630.526	-0.281336	0.115615	-2.43339	0.0149581	0.0402522
NM_001008709	PPP1CA	2878.96	-0.173155	0.0882547	-1.96199	0.0497638	0.0991726
NM_001008723	CFAP58	0.132469	0.0167661	0.0294891	0.568552	0.56966	NA
NM_001008727	ZNF121	721.02	-0.382388	0.104923	-3.64446	0.000267956	0.00210874
NM_001008737	LOC401052	19.3416	0.111198	0.189603	0.586476	0.557555	0.652815
NM_001008738	FNIP1	857.199	-0.277683	0.101951	-2.72369	0.00645569	0.0215649
NM_001008739	C6orf226	32.6329	0.0975393	0.187056	0.521443	0.602058	0.691237
NM_001008740	TMCO2	0	NA	NA	NA	NA	NA
NM_001008743	SULT1C3	0	NA	NA	NA	NA	NA
NM_001008747	CTAGE15	0	NA	NA	NA	NA	NA
NM_001008749	RAB19	0.201177	-0.0258809	0.0347514	-0.744745	0.456426	NA
NM_001008777	FBXO47	0.16973	0.0203348	0.0324771	0.626128	0.531231	NA
NM_001008778	SPDYC	0.16973	0.0203348	0.0324771	0.626128	0.531231	NA
NM_001008781	FAT3	0	NA	NA	NA	NA	NA
NM_001008783	SLC35D3	7.18498	0.165035	0.167332	0.986273	0.323999	NA
NM_001008784	CD200R1L	0	NA	NA	NA	NA	NA
NM_001008895	CUL4A	3377.74	-0.310432	0.0942023	-3.29537	0.000982915	0.00542251
NM_001008897	TCP1	11870.6	-0.329639	0.0920311	-3.58182	0.000341208	0.00250887
NM_001008901	GTSF1L	0	NA	NA	NA	NA	NA
NM_001008910	STK16	329.21	-0.137569	0.115374	-1.19238	0.233114	0.329347
NM_001008938	CKAP5	4378.79	-0.412316	0.0955998	-4.31293	1.61102e-05	0.000257427
NM_001008949	ITPRIPL1	1000.98	-0.185285	0.0889284	-2.08353	0.0372028	0.079657
NM_001009	RPS5	14933.6	-0.184088	0.0814238	-2.26087	0.0237676	0.0568464
NM_001009181	STATH	0	NA	NA	NA	NA	NA
NM_001009183	GEMIN2	486.577	0.00241072	0.113231	0.0212903	0.983014	0.987938
NM_001009185	ACSL6	0.276713	0.0375432	0.0439615	0.854002	0.393104	NA
NM_001009186	CCT6A	11086.4	-0.303269	0.0916822	-3.30783	0.000940235	0.00523956
NM_001009552	PPP2CB	1710.98	-0.169789	0.0976777	-1.73826	0.0821649	0.146481
NM_001009555	SH3D19	2.4655	0.0691247	0.118924	0.581252	0.561071	NA
NM_001009562	SLCO1B7	0	NA	NA	NA	NA	NA
NM_001009565	CDKL4	49.6307	-0.444644	0.179305	-2.47981	0.0131451	0.0365105
NM_001009566	CLSTN1	4704.29	-0.311746	0.0862555	-3.61421	0.00030126	0.00228889
NM_001009568	SMPDL3B	11.3258	-0.507532	0.181095	-2.80257	0.00506967	0.0180481
NM_001009571	CADPS2	4.64571	-0.0642254	0.147916	-0.434202	0.664142	NA
NM_001009606	HS3ST6	75.8593	0.169888	0.162633	1.04461	0.296203	0.399548
NM_001009608	SLX4IP	74.4942	-0.116577	0.172456	-0.675978	0.499055	0.600098
NM_001009609	SPANXN3	0	NA	NA	NA	NA	NA
NM_001009611	PRAMEF4	0.297495	-0.00470443	0.044414	-0.105922	0.915644	NA
NM_001009612	C20orf202	0.144243	0.0178801	0.0304507	0.587182	0.557081	NA
NM_001009613	SPANXN4	0	NA	NA	NA	NA	NA
NM_001009614	SPANXN1	0	NA	NA	NA	NA	NA
NM_001009615	SPANXN2	0	NA	NA	NA	NA	NA
NM_001009616	SPANXN5	0	NA	NA	NA	NA	NA
NM_001009812	LBX2	176.278	-0.442604	0.132499	-3.34043	0.000836477	0.00481574
NM_001009880	KIAA0930	1012.58	-0.275419	0.102501	-2.68698	0.00721002	0.0233642
NM_001009881	ZCCHC11	1352.45	-0.317591	0.0948321	-3.34898	0.000811098	0.00471228
NM_001009894	C12orf29	801.621	-0.372413	0.103498	-3.59828	0.000320328	0.00239601
NM_001009899	KIAA2018	888.463	-0.123139	0.111378	-1.1056	0.2689	0.369012
NM_001009905	B3GNTL1	180.21	-0.518451	0.132435	-3.91477	9.04907e-05	0.000945725
NM_001009909	LUZP2	0	NA	NA	NA	NA	NA
NM_001009931	HRNR	0.144243	0.0178801	0.0304507	0.587182	0.557081	NA
NM_001009939	2005-09-01	1146.58	-0.145645	0.0904684	-1.6099	0.107419	0.179835
NM_001009959	ERMN	0	NA	NA	NA	NA	NA
NM_001009984	C20orf194	492.891	-0.276574	0.117721	-2.34939	0.0188039	0.0477802
NM_001009991	SYTL3	0.928636	-0.0156543	0.0742425	-0.210854	0.833002	NA
NM_001009992	ZNF648	0	NA	NA	NA	NA	NA
NM_001009993	FAM168B	7370.65	-0.189954	0.0926612	-2.04998	0.0403659	0.0846475
NM_001009994	RIPPLY2	3.48507	-0.282625	0.13137	-2.15137	0.0314472	NA
NM_001009997	C10orf62	0.869927	-0.0283194	0.0719254	-0.393733	0.693778	NA
NM_001009998	SSBP4	2768.09	-0.351429	0.0814626	-4.314	1.6033e-05	0.000257014
NM_001010	RPS6	20694	-0.161872	0.087466	-1.85069	0.0642146	0.120736
NM_001010000	ARHGAP28	4282.94	0.17492	0.0912639	1.91664	0.0552838	0.107502
NM_001010844	IRAK1BP1	214.783	-0.509233	0.131745	-3.8653	0.000110951	0.00109129
NM_001010845	ACSM2A	0	NA	NA	NA	NA	NA
NM_001010846	SHE	0.3022	0.0399597	0.0453408	0.881319	0.378145	NA
NM_001010847	LRRC38	6.44511	0.157302	0.152556	1.03111	0.302488	NA
NM_001010848	NRG3	0	NA	NA	NA	NA	NA
NM_001010851	ZNF766	534.93	-0.364208	0.10471	-3.47824	0.000504721	0.00331641
NM_001010852	CLVS2	0	NA	NA	NA	NA	NA
NM_001010853	PM20D2	806.018	-0.418244	0.108211	-3.86508	0.000111051	0.00109178
NM_001010854	TTC7B	534.861	-0.488861	0.103347	-4.73027	2.24219e-06	6.05007e-05
NM_001010855	PIK3R6	0.165025	-0.0221846	0.0322425	-0.688056	0.491417	NA
NM_001010857	LELP1	0	NA	NA	NA	NA	NA
NM_001010858	RNF187	6778.76	-0.207969	0.0828801	-2.50928	0.0120979	0.0343747
NM_001010859	C22orf42	0	NA	NA	NA	NA	NA
NM_001010860	SAMD15	11.4171	0.17474	0.182139	0.959374	0.33737	0.44219
NM_001010861	LPPR5	0	NA	NA	NA	NA	NA
NM_001010862	SPIN3	356.591	-0.462709	0.122915	-3.76447	0.000166902	0.00149666
NM_001010863	C10orf128	0	NA	NA	NA	NA	NA
NM_001010867	IBA57	1014.51	0.109519	0.100115	1.09394	0.273983	0.374835
NM_001010868	C6orf163	7.13061	-0.062379	0.165882	-0.376044	0.706884	NA
NM_001010870	TDRD6	0	NA	NA	NA	NA	NA
NM_001010872	FAM83B	0	NA	NA	NA	NA	NA
NM_001010873	TSPO2	0.571323	-0.0317761	0.0600266	-0.529367	0.596551	NA
NM_001010874	TECRL	0	NA	NA	NA	NA	NA
NM_001010876	TMEM244	0	NA	NA	NA	NA	NA
NM_001010877	ZNF311	0	NA	NA	NA	NA	NA
NM_001010879	ZIK1	1.87474	-0.00226346	0.103724	-0.0218219	0.98259	NA
NM_001010880	ZNF780A	266.766	-0.062832	0.132368	-0.474676	0.635018	0.719451
NM_001010881	C1orf167	66.3696	-0.0657795	0.167333	-0.393106	0.694241	0.767395
NM_001010883	FAM102B	17.783	0.0626428	0.186459	0.33596	0.736901	0.802094
NM_001010886	CLPSL1	0	NA	NA	NA	NA	NA
NM_001010887	ACER2	43.5619	-0.104919	0.180469	-0.581371	0.56099	0.655845
NM_001010888	ZC3H12B	199.047	-0.578171	0.133729	-4.32345	1.53611e-05	0.000248456
NM_001010889	PRAMEF6	0.704554	-0.0118315	0.0656196	-0.180304	0.856914	NA
NM_001010890	PRAMEF9	0.704554	-0.0118315	0.0656196	-0.180304	0.856914	NA
NM_001010891	MTX3	681.399	-0.192443	0.121408	-1.58509	0.112946	0.187161
NM_001010892	RSPH4A	10.3188	0.0235699	0.176954	0.133198	0.894036	0.922326
NM_001010893	SLC10A5	13.9918	-0.00888698	0.184948	-0.0480513	0.961675	0.972211
NM_001010895	ERCC6L2	447.566	-0.259746	0.112308	-2.3128	0.0207334	0.0514412
NM_001010896	C10orf113	0.370908	-0.0046177	0.0479474	-0.0963076	0.923276	NA
NM_001010897	SERP2	0	NA	NA	NA	NA	NA
NM_001010898	SLC6A17	0.132469	0.0167661	0.0294891	0.568552	0.56966	NA
NM_001010903	C6orf222	0.144243	0.0178801	0.0304507	0.587182	0.557081	NA
NM_001010904	GLYATL3	0	NA	NA	NA	NA	NA
NM_001010905	C6orf58	0	NA	NA	NA	NA	NA
NM_001010906	NUGGC	0.200416	-0.0258074	0.0347035	-0.743654	0.457086	NA
NM_001010908	C1QL3	66.6953	-0.0575694	0.175095	-0.328789	0.742315	0.806344
NM_001010909	MUC21	0	NA	NA	NA	NA	NA
NM_001010911	CASC10	353.804	-0.312507	0.112071	-2.78848	0.00529564	0.0186263
NM_001010912	C10orf120	0	NA	NA	NA	NA	NA
NM_001010915	PTPLAD2	1.12004	0.000817979	0.0855929	0.00955662	0.992375	NA
NM_001010917	GOLGA7B	1.20215	0.115425	0.0884627	1.30479	0.191964	NA
NM_001010919	FAM26F	138.804	-0.0702669	0.144317	-0.486892	0.626335	0.712055
NM_001010922	BCL2L15	10.1694	0.151954	0.178666	0.850495	0.39505	0.499907
NM_001010923	THEMIS	0	NA	NA	NA	NA	NA
NM_001010924	FAM171A1	1968.86	-0.196897	0.088598	-2.22237	0.0262586	0.0613263
NM_001010926	HES5	39.9636	-0.247007	0.182793	-1.35129	0.176603	0.265283
NM_001010927	TIAM2	15.5659	0.0235248	0.186734	0.12598	0.899748	0.926205
NM_001010939	LIPJ	0	NA	NA	NA	NA	NA
NM_001010940	C9orf135	0	NA	NA	NA	NA	NA
NM_001010942	RAP1B	1284.47	-0.279095	0.0968872	-2.88061	0.00396904	0.0151374
NM_001010969	CYP4A22	0.400832	-0.049752	0.0479334	-1.03794	0.299298	NA
NM_001010972	ZYX	2773.63	0.322995	0.0892045	3.62084	0.000293644	0.00225336
NM_001010977	METTL21C	0.401593	-0.0550531	0.0502322	-1.09597	0.273091	NA
NM_001010978	LDLRAD1	0.200416	-0.0258074	0.0347035	-0.743654	0.457086	NA
NM_001010979	C1orf189	1.27751	0.104285	0.0853479	1.22188	0.221753	NA
NM_001010980	NCMAP	0.144243	0.0178801	0.0304507	0.587182	0.557081	NA
NM_001010983	GLT8D1	910.966	-0.297415	0.10265	-2.89736	0.00376319	0.0145698
NM_001010984	SPRTN	1817.48	-0.406177	0.100229	-4.0525	5.0674e-05	0.000606485
NM_001010985	MYBPHL	0.344659	-0.00638157	0.046736	-0.136545	0.89139	NA
NM_001010987	IFIT1B	0	NA	NA	NA	NA	NA
NM_001010989	HERPUD1	983.27	-0.0191369	0.100271	-0.190851	0.848642	0.888557
NM_001011	RPS7	9333.5	-0.171961	0.0833517	-2.06308	0.0391052	0.0826063
NM_001011543	MAGEA10	0.200416	-0.0258074	0.0347035	-0.743654	0.457086	NA
NM_001011544	MAGEA11	0.132469	0.0167661	0.0294891	0.568552	0.56966	NA
NM_001011546	DSTN	5407.75	-0.0903048	0.0939914	-0.960777	0.336664	0.441516
NM_001011547	SLC5A9	0.276713	0.0375432	0.0439615	0.854002	0.393104	NA
NM_001011548	MAGEA4	10833.4	-0.138348	0.086582	-1.59788	0.110069	0.183379
NM_001011552	SLC9A4	0	NA	NA	NA	NA	NA
NM_001011553	2007-09-01	5676.87	-0.302793	0.0965734	-3.13537	0.0017164	0.00814785
NM_001011554	SLC13A3	20.9345	-0.0536244	0.189669	-0.282727	0.777386	0.833503
NM_001011657	ZMAT1	0.333647	-0.00737081	0.0461889	-0.15958	0.873212	NA
NM_001011663	PCGF6	902.009	-0.201519	0.103824	-1.94098	0.0522613	0.102942
NM_001011666	CREB5	137.146	-0.174337	0.141809	-1.22938	0.218929	0.313653
NM_001011670	CHCHD7	1012.39	-0.227728	0.0916424	-2.48497	0.0129564	0.0361881
NM_001011699	HAUS8	908.252	-0.0758588	0.0963103	-0.78765	0.430901	0.534839
NM_001011700	MCCD1	0	NA	NA	NA	NA	NA
NM_001011703	MVB12B	42.4728	0.164003	0.179467	0.913835	0.360803	0.465375
NM_001011705	LECT1	1.45763	0.0378623	0.0949746	0.398657	0.690146	NA
NM_001011708	OLA1	5281.27	-0.243236	0.0944514	-2.57525	0.0100168	0.0298587
NM_001011709	PNLIPRP3	0	NA	NA	NA	NA	NA
NM_001011713	NAA30	1054.43	-0.300908	0.101875	-2.95368	0.00314005	0.0127476
NM_001011717	NMS	0	NA	NA	NA	NA	NA
NM_001011718	XKR7	0	NA	NA	NA	NA	NA
NM_001011719	ARSH	0	NA	NA	NA	NA	NA
NM_001011720	XKR9	0.534824	-0.0318361	0.0563796	-0.564673	0.572296	NA
NM_001011722	ARHGEF10L	72.7667	-0.0211723	0.168036	-0.125998	0.899733	0.926205
NM_001011725	HNRNPA1L2	278.061	-0.0924779	0.121183	-0.763126	0.445388	0.549195
NM_001011878	DEFB121	0	NA	NA	NA	NA	NA
NM_001011880	CLEC18B	0	NA	NA	NA	NA	NA
NM_001011885	BTBD1	4207	-0.265838	0.0932054	-2.85218	0.00434212	0.0161189
NM_001012	RPS8	16394.3	-0.176103	0.0872239	-2.01897	0.0434899	0.0896208
NM_001012241	MSL1	5840.98	-0.11749	0.0947975	-1.23938	0.215204	0.309443
NM_001012264	RNASE13	0.200416	-0.0258074	0.0347035	-0.743654	0.457086	NA
NM_001012271	BIRC5	3890.97	-0.171959	0.0864376	-1.9894	0.0466575	0.0946415
NM_001012276	PRAMEF8	0.622133	0.0309096	0.063576	0.486183	0.626837	NA
NM_001012277	PRAMEF7	0.622133	0.0309096	0.063576	0.486183	0.626837	NA
NM_001012279	SOGA3	9.69582	0.212454	0.177313	1.19819	0.230844	0.326712
NM_001012288	CRLF2	0	NA	NA	NA	NA	NA
NM_001012301	ARSI	0.67471	-0.0532713	0.0656017	-0.812042	0.416768	NA
NM_001012302	ANO9	23.7789	0.099434	0.189441	0.52488	0.599667	0.689123
NM_001012303	SERPINI2	0	NA	NA	NA	NA	NA
NM_001012321	RPSA	9603.47	-0.233749	0.0872079	-2.68036	0.00735429	0.0237262
NM_001012337	ROPN1B	0	NA	NA	NA	NA	NA
NM_001012339	DNAJC21	3785.62	-0.329221	0.0923164	-3.56623	0.000362155	0.00261152
NM_001012361	WDR31	2.61757	0.0452354	0.122175	0.370251	0.711195	NA
NM_001012393	OPCML	0	NA	NA	NA	NA	NA
NM_001012410	SGOL1	578.889	-0.380295	0.104727	-3.63131	0.000281984	0.0021869
NM_001012414	TRIM61	0	NA	NA	NA	NA	NA
NM_001012416	KRTAP5-6	0	NA	NA	NA	NA	NA
NM_001012417	MS4A13	0	NA	NA	NA	NA	NA
NM_001012418	MYLK4	8.21313	0.221097	0.171487	1.28929	0.197296	0.289573
NM_001012419	ANKRD20A3	4.2342	0.10098	0.142916	0.706569	0.479834	NA
NM_001012421	ANKRD20A2	0.946224	0.0333185	0.0780033	0.427142	0.669276	NA
NM_001012425	C1orf146	1.76042	-0.0677329	0.101433	-0.667759	0.504288	NA
NM_001012426	FOXP4	5648.3	-0.355883	0.0857042	-4.15246	3.28926e-05	0.00043648
NM_001012428	ASB11	0	NA	NA	NA	NA	NA
NM_001012446	FAM221B	0.791102	0.0547463	0.0729017	0.750961	0.452676	NA
NM_001012454	FAM71F2	2.71472	0.0562025	0.120763	0.465394	0.641649	NA
NM_001012455	ZSCAN23	14.6489	0.00193959	0.187397	0.0103502	0.991742	0.994189
NM_001012456	SEC61G	1089.69	-0.140363	0.0983211	-1.4276	0.153408	0.238232
NM_001012478	U2AF2	8407.91	-0.0177931	0.0833617	-0.213445	0.83098	0.874782
NM_001012502	C9orf117	55.5999	0.017874	0.175898	0.101616	0.919062	0.940677
NM_001012503	KRTAP5-7	0	NA	NA	NA	NA	NA
NM_001012506	CCDC66	548.52	-0.355788	0.114527	-3.1066	0.00189254	0.0087655
NM_001012508	SPRN	367.815	-0.0705128	0.116753	-0.603948	0.545878	0.642727
NM_001012509	SLC45A2	0.200416	-0.0258074	0.0347035	-0.743654	0.457086	NA
NM_001012512	GRP	0	NA	NA	NA	NA	NA
NM_001012614	CTBP1	4842.77	-0.155113	0.0854161	-1.81597	0.0693756	0.128032
NM_001012632	IL32	33.3098	0.0874272	0.185313	0.47178	0.637084	0.7212
NM_001012642	GRAMD2	22.1217	0.430861	0.18976	2.27057	0.0231733	0.0557284
NM_001012643	MYPOP	264.459	-0.122431	0.122074	-1.00293	0.315897	0.42031
NM_001012644	DUSP15	0.401593	-0.0550531	0.0502322	-1.09597	0.273091	NA
NM_001012659	ARGFX	0	NA	NA	NA	NA	NA
NM_001012662	SLC3A2	1311.64	-0.068074	0.089483	-0.760748	0.446807	0.550468
NM_001012706	C14orf182	0.823165	0.0966578	0.0692318	1.39615	0.16267	NA
NM_001012708	KRTAP5-3	0	NA	NA	NA	NA	NA
NM_001012709	KRTAP5-4	0	NA	NA	NA	NA	NA
NM_001012710	KRTAP5-10	0.165025	-0.0221846	0.0322425	-0.688056	0.491417	NA
NM_001012715	C9orf106	0.201177	-0.0258809	0.0347514	-0.744745	0.456426	NA
NM_001012716	TYMSOS	1003.23	-0.0745563	0.0974723	-0.764897	0.444333	0.548278
NM_001012720	RGR	0	NA	NA	NA	NA	NA
NM_001012727	AGPAT2	644.877	-0.203752	0.100135	-2.03478	0.0418735	0.0870585
NM_001012728	DPRX	0	NA	NA	NA	NA	NA
NM_001012729	DUXA	1.49854	0.102853	0.0971549	1.05865	0.28976	NA
NM_001012753	ZNF763	11.8529	-0.0921991	0.182374	-0.505549	0.613173	0.700498
NM_001012754	NHLRC3	331.521	-0.206554	0.117662	-1.75548	0.0791765	0.142376
NM_001012755	SLC25A53	59.0386	-0.309774	0.173173	-1.78882	0.0736444	0.134147
NM_001012758	NUDT17	71.8727	-0.140113	0.161875	-0.865562	0.38673	0.49148
NM_001012761	RGMB	799.866	-0.345872	0.102919	-3.36063	0.000777652	0.00455693
NM_001012762	CTU2	539.266	-0.21203	0.104746	-2.02424	0.0429456	0.0887622
NM_001012957	DISC1	4.96217	0.0569351	0.1458	0.3905	0.696167	NA
NM_001012964	KLK6	0	NA	NA	NA	NA	NA
NM_001012967	DDX60L	39.8334	-0.220145	0.184367	-1.19405	0.232457	0.3287
NM_001012968	SPIN4	1139.96	-0.240151	0.0978177	-2.45508	0.0140852	0.0384607
NM_001012969	ADAL	0.132469	0.0167661	0.0294891	0.568552	0.56966	NA
NM_001012970	C1orf100	0	NA	NA	NA	NA	NA
NM_001012971	FAM209A	1.91283	-0.00450884	0.102686	-0.0439088	0.964977	NA
NM_001012973	PLAC9	0.964788	-0.0181433	0.0750246	-0.241831	0.808911	NA
NM_001012975	RNASE10	0	NA	NA	NA	NA	NA
NM_001012977	PABPC1L2A	0	NA	NA	NA	NA	NA
NM_001012978	BEX5	1.85245	-0.0960207	0.104604	-0.917946	0.358647	NA
NM_001012979	TCEAL5	1.94993	0.0531857	0.106151	0.50104	0.616343	NA
NM_001012980	SATL1	138.495	-0.398774	0.139236	-2.86402	0.00418304	0.0156973
NM_001012981	ZKSCAN2	649.956	-0.171881	0.103388	-1.66248	0.0964158	0.165369
NM_001012984	C16orf86	2.7623	0.090312	0.115701	0.780563	0.43506	NA
NM_001012989	UBE2NL	0.927806	-0.00194883	0.0364045	-0.0535327	0.957308	NA
NM_001012991	KNOP1	2104.64	-0.221476	0.0935939	-2.36635	0.0179644	0.0461925
NM_001012993	C9orf152	0	NA	NA	NA	NA	NA
NM_001012994	SNX30	510.612	-0.279293	0.120707	-2.31381	0.020678	0.0513251
NM_001013	RPS9	16198	-0.134408	0.0784576	-1.71313	0.0866892	0.152438
NM_001013031	SORCS1	1.89543	0.00733801	0.105375	0.0696369	0.944483	NA
NM_001013253	LSP1	1.68454	-0.138954	0.0986891	-1.408	0.159131	NA
NM_001013257	BCAM	97.9204	-0.206185	0.151932	-1.35709	0.174752	0.263095
NM_001013354	OR11H12	0	NA	NA	NA	NA	NA
NM_001013355	OR2G6	0	NA	NA	NA	NA	NA
NM_001013356	OR8U8	0	NA	NA	NA	NA	NA
NM_001013358	OR9G9	0	NA	NA	NA	NA	NA
NM_001013403	CXorf66	0	NA	NA	NA	NA	NA
NM_001013407	PRAMEF5	0.201177	-0.0258809	0.0347514	-0.744745	0.456426	NA
NM_001013415	FBXW7	476.373	-0.159602	0.113677	-1.404	0.16032	0.246406
NM_001013435	PAGE5	0	NA	NA	NA	NA	NA
NM_001013579	AWAT1	0	NA	NA	NA	NA	NA
NM_001013615	LURAP1	12.174	-0.169816	0.182447	-0.930771	0.351972	0.456763
NM_001013619	HYKK	120.94	-0.22293	0.143928	-1.5489	0.121406	0.197854
NM_001013620	ALG10B	302.25	-0.163197	0.116497	-1.40087	0.161253	0.247509
NM_001013623	ZC2HC1B	0.132469	0.0167661	0.0294891	0.568552	0.56966	NA
NM_001013625	C1orf192	182.442	-0.317889	0.129368	-2.45724	0.0140009	0.0382654
NM_001013626	PPP1R42	0.200416	-0.0258074	0.0347035	-0.743654	0.457086	NA
NM_001013627	NHSL2	0.132469	0.0167661	0.0294891	0.568552	0.56966	NA
NM_001013628	DCAF12L2	0.553425	0.0723966	0.0603921	1.19878	0.230615	NA
NM_001013630	AADACL4	0	NA	NA	NA	NA	NA
NM_001013631	HNRNPCL1	1.83547	0.0829639	0.101975	0.813568	0.415892	NA
NM_001013632	TCTEX1D4	2.71337	-0.0807006	0.122571	-0.658401	0.510281	NA
NM_001013635	CCDC184	1.00316	-0.0114812	0.0790329	-0.145271	0.884497	NA
NM_001013638	PRR25	3.60945	-0.054773	0.136924	-0.400025	0.689138	NA
NM_001013641	TMEM82	0	NA	NA	NA	NA	NA
NM_001013642	TRNP1	19.2161	0.264179	0.189621	1.3932	0.163559	0.250124
NM_001013643	C1orf137	0	NA	NA	NA	NA	NA
NM_001013646	FAM209B	7.77213	0.175755	0.168171	1.0451	0.295978	NA
NM_001013647	FAM227A	64.9	-0.15631	0.168495	-0.927685	0.353571	0.458281
NM_001013649	C2orf68	1528.25	-0.342247	0.0983302	-3.48059	0.000500304	0.00329522
NM_001013650	PRR23B	0	NA	NA	NA	NA	NA
NM_001013653	LRRC26	30.0057	0.158612	0.187673	0.845151	0.398026	0.502759
NM_001013657	GDPGP1	109.048	-0.118955	0.149262	-0.796955	0.425477	0.529579
NM_001013658	PTX4	1.24261	0.0233955	0.0892983	0.261993	0.793327	NA
NM_001013659	ZNF793	54.9676	-0.132612	0.172879	-0.767079	0.443034	0.547103
NM_001013660	FRRS1	276.186	-0.505368	0.129745	-3.8951	9.81596e-05	0.00100228
NM_001013661	VSIG8	0.200416	-0.0258074	0.0347035	-0.743654	0.457086	NA
NM_001013663	PTRHD1	1063.08	0.0132173	0.0897962	0.147192	0.88298	0.914264
NM_001013672	C17orf97	15.0164	0.603554	0.186272	3.24018	0.00119455	0.00625015
NM_001013690	FIGNL2	1.98532	0.0507244	0.106458	0.476472	0.633738	NA
NM_001013693	LDLRAD2	142.349	-0.203876	0.143262	-1.4231	0.154706	0.239708
NM_001013694	SRRD	488.327	-0.237206	0.105101	-2.25693	0.0240126	0.0573314
NM_001013698	SMCO3	4.75366	0.0359202	0.148787	0.241419	0.80923	NA
NM_001013699	H3F3C	4.82963	-0.0104207	0.149849	-0.0695414	0.944559	NA
NM_001013703	EIF2AK4	2457.54	-0.506164	0.0914585	-5.53435	3.12384e-08	2.35248e-06
NM_001013706	PLIN5	13.4176	0.222636	0.185466	1.20042	0.229978	0.325829
NM_001013732	PTCHD4	0.165025	-0.0221846	0.0322425	-0.688056	0.491417	NA
NM_001013734	RFPL4B	22.3534	0.130016	0.189506	0.686082	0.492661	0.593796
NM_001013735	FOXB2	0.276713	0.0375432	0.0439615	0.854002	0.393104	NA
NM_001013736	FAM47C	0	NA	NA	NA	NA	NA
NM_001013742	DGKK	0.132469	0.0167661	0.0294891	0.568552	0.56966	NA
NM_001013743	TMEM225	0	NA	NA	NA	NA	NA
NM_001013836	MAD1L1	609.669	-0.325271	0.110713	-2.93795	0.00330386	0.0132443
NM_001013838	RLTPR	132.057	0.358285	0.142809	2.50884	0.0121129	0.0344042
NM_001013842	C8orf58	158.523	0.112992	0.133959	0.843484	0.398958	0.503574
NM_001013843	SLTM	4176.17	-0.278949	0.0952711	-2.92795	0.00341206	0.0135688
NM_001013845	CXorf40B	597.474	-0.04328	0.0979086	-0.442044	0.658457	0.738447
NM_001014	RPS10	3639.51	-0.209323	0.0849904	-2.4629	0.0137817	0.0378185
NM_001014279	ANXA2R	0.779328	0.0538099	0.0726013	0.741171	0.45859	NA
NM_001014283	DCUN1D2	409.661	-0.0907538	0.108795	-0.834173	0.404183	0.508602
NM_001014291	SPRR2G	0	NA	NA	NA	NA	NA
NM_001014336	IL31	0	NA	NA	NA	NA	NA
NM_001014342	FLG2	0	NA	NA	NA	NA	NA
NM_001014431	AKT1	3628	-0.200258	0.0809359	-2.47428	0.0133506	0.0369405
NM_001014433	CUTA	0	NA	NA	NA	NA	NA
NM_001014434	LHX9	0.144243	0.0178801	0.0304507	0.587182	0.557081	NA
NM_001014435	CA7	1.30262	-0.135124	0.0874581	-1.54501	0.122344	NA
NM_001014440	ODF3B	10.8114	0.00520383	0.181099	0.0287347	0.977076	0.983522
NM_001014442	C1QTNF9B-AS1	12.6085	-0.183325	0.183997	-0.996346	0.319082	0.423606
NM_001014443	USP21	859.557	-0.259691	0.0935854	-2.77491	0.00552174	0.0192427
NM_001014444	CRYM	6.10874	0.0118186	0.160821	0.073489	0.941417	NA
NM_001014446	OCIAD2	0	NA	NA	NA	NA	NA
NM_001014448	CPZ	12.6151	0.329035	0.18402	1.78804	0.07377	0.134334
NM_001014450	SPRR2F	0	NA	NA	NA	NA	NA
NM_001014763	ETFB	972.176	-0.164818	0.0928542	-1.77502	0.0758943	0.137548
NM_001014797	KCNMA1	0.796167	-0.0339046	0.070147	-0.483336	0.628857	NA
NM_001014811	ME3	1.28901	0.0223428	0.0907711	0.246144	0.805571	NA
NM_001014812	FAM96A	1414.65	-0.3956	0.0956488	-4.13596	3.53473e-05	0.000462283
NM_001014830	C14orf183	1.67439	0.017462	0.0990858	0.176231	0.860113	NA
NM_001014832	PAK4	1613.61	-0.139258	0.0873763	-1.59377	0.110987	0.184599
NM_001014977	BANF2	0	NA	NA	NA	NA	NA
NM_001014980	FAM132A	312.748	-0.340639	0.120056	-2.83734	0.00454905	0.0167182
NM_001014985	GLTPD2	17.4461	0.0407819	0.189086	0.215679	0.829238	0.873563
NM_001014986	FOLH1	0.200416	-0.0258074	0.0347035	-0.743654	0.457086	NA
NM_001014989	LAT	60.582	-0.152021	0.169065	-0.899184	0.368554	0.47327
NM_001014999	SLX1A	14.1318	-0.169967	0.186826	-0.909762	0.362948	0.467718
NM_001015	RPS11	15200.8	-0.161157	0.0843411	-1.91078	0.0560328	0.108597
NM_001015001	CKMT1A	108.439	-0.303901	0.155959	-1.94859	0.0513443	0.101557
NM_001015002	LLGL2	21.1125	-0.361657	0.189778	-1.90568	0.0566914	0.109582
NM_001015038	PAGE2B	1.63	0.0639833	0.0998597	0.640732	0.521697	NA
NM_001015048	BAG5	1653.97	-0.354574	0.0917031	-3.86654	0.00011039	0.00108778
NM_001015050	ALG1L	11.5638	0.431955	0.181375	2.38156	0.0172397	0.0448031
NM_001015052	MPG	1249.21	-0.279242	0.0868622	-3.21477	0.00130547	0.0066649
NM_001015053	HDAC5	1355.7	-0.36345	0.0894915	-4.06128	4.88049e-05	0.000591695
NM_001015072	UFSP1	30.4843	0.29617	0.186617	1.58704	0.112503	0.186581
NM_001015877	PHF6	3129.15	-0.423635	0.0982056	-4.31376	1.60499e-05	0.000257014
NM_001015878	AURKC	1.29054	0.02225	0.0907936	0.245062	0.806409	NA
NM_001015880	PAPSS2	1340.11	-0.419063	0.096424	-4.34605	1.38613e-05	0.000231645
NM_001015881	TSC22D3	231.048	-0.0937029	0.121097	-0.773783	0.439059	0.54325
NM_001015882	DNAJC25	450.768	-0.0503052	0.109099	-0.461095	0.644731	0.727158
NM_001015887	IGSF11	0.144243	0.0178801	0.0304507	0.587182	0.557081	NA
NM_001016	RPS12	11845.8	-0.15239	0.0852876	-1.78678	0.0739738	0.134656
NM_001017	RPS13	6682.42	-0.180188	0.0884484	-2.03721	0.0416288	0.0866637
NM_001017361	KHDC3L	0	NA	NA	NA	NA	NA
NM_001017363	ARID3C	5.61781	0.0432744	0.154462	0.280162	0.779353	NA
NM_001017371	SP3	5308.09	-0.138819	0.0934089	-1.48614	0.137242	0.217776
NM_001017372	SLC27A6	0.132469	0.0167661	0.0294891	0.568552	0.56966	NA
NM_001017373	SAMD3	0.566618	-0.0833039	0.0613059	-1.35882	0.174203	NA
NM_001017388	TLR10	0	NA	NA	NA	NA	NA
NM_001017390	SULT1A4	0.565199	0.0722578	0.0603118	1.19807	0.23089	NA
NM_001017395	TMCC1	596.681	-0.184215	0.105319	-1.74911	0.0802719	0.143895
NM_001017403	LGR6	0.132469	0.0167661	0.0294891	0.568552	0.56966	NA
NM_001017408	GOPC	996.156	-0.239317	0.106609	-2.2448	0.0247807	0.0587897
NM_001017416	USP1	4101.17	-0.177209	0.097038	-1.82619	0.0678223	0.12583
NM_001017417	CT45A1	0	NA	NA	NA	NA	NA
NM_001017418	SPRR2B	0	NA	NA	NA	NA	NA
NM_001017420	ESCO2	1557.94	-0.397469	0.102977	-3.8598	0.000113478	0.00111059
NM_001017423	ALDH18A1	6451.87	-0.33424	0.0867679	-3.85212	0.000117099	0.00113767
NM_001017424	KCNK2	0.288486	0.0347147	0.0421948	0.822724	0.410665	NA
NM_001017435	CT45A3	0	NA	NA	NA	NA	NA
NM_001017436	CT45A4	0	NA	NA	NA	NA	NA
NM_001017437	CCDC157	169.76	-0.15678	0.132413	-1.18402	0.236404	0.332752
NM_001017438	CT45A6	0	NA	NA	NA	NA	NA
NM_001017440	CALN1	0.165025	-0.0221846	0.0322425	-0.688056	0.491417	NA
NM_001017520	DNTT	0	NA	NA	NA	NA	NA
NM_001017524	SIRT3	508.629	-0.130619	0.103635	-1.26038	0.207534	0.300991
NM_001017534	CARD16	0	NA	NA	NA	NA	NA
NM_001017915	INPP5D	3.34947	0.00580368	0.132287	0.0438719	0.965007	NA
NM_001017917	CYB561	154.126	-0.145722	0.134879	-1.08039	0.279967	0.381589
NM_001017920	DAPL1	0	NA	NA	NA	NA	NA
NM_001017921	VMAC	69.9966	-0.0681958	0.163928	-0.416011	0.677402	0.753321
NM_001017923	C14orf28	66.6993	-0.0474467	0.171533	-0.276604	0.782084	0.837134
NM_001017924	LRIT2	0	NA	NA	NA	NA	NA
NM_001017927	C2orf76	263.088	-0.153728	0.127366	-1.20698	0.227441	0.322896
NM_001017928	CCDC58	1033.19	-0.154508	0.099074	-1.55952	0.118873	0.194642
NM_001017930	DCAF8L1	0	NA	NA	NA	NA	NA
NM_001017958	OS9	3904.25	-0.164749	0.094284	-1.74737	0.0805731	0.14434
NM_001017961	FAM78B	6.15567	-0.151126	0.159519	-0.947391	0.34344	NA
NM_001017964	YDJC	1052.64	-0.147416	0.0979241	-1.50542	0.132217	0.211438
NM_001017967	MARVELD3	4.51407	-0.0862344	0.143636	-0.600366	0.548262	NA
NM_001017969	KIAA2026	808.528	-0.391948	0.100526	-3.89898	9.65981e-05	0.00099276
NM_001017970	TMEM30B	0	NA	NA	NA	NA	NA
NM_001017971	ATP6AP1L	55.8186	-0.0759409	0.172813	-0.439439	0.660343	0.739817
NM_001017975	HFM1	3.65543	0.0235749	0.13385	0.176128	0.860193	NA
NM_001017977	DCAF6	3528.01	-0.326939	0.0962209	-3.3978	0.000679309	0.00414307
NM_001017978	CT83	0	NA	NA	NA	NA	NA
NM_001017980	VMA21	2374.56	-0.327039	0.0944342	-3.46314	0.000533908	0.00346328
NM_001017981	RNF215	210.133	-0.0592915	0.128442	-0.46162	0.644354	0.726953
NM_001017990	H2AFB1	0	NA	NA	NA	NA	NA
NM_001017991	H2AFB2	0	NA	NA	NA	NA	NA
NM_001017992	ACTBL2	0	NA	NA	NA	NA	NA
NM_001017995	SH3PXD2B	404.364	-0.387341	0.109288	-3.54423	0.000393766	0.00277129
NM_001017998	GNG10	270.841	-0.135815	0.123375	-1.10083	0.270971	0.371496
NM_001018	RPS15	8209.94	-0.21666	0.080516	-2.6909	0.00712605	0.0231448
NM_001018000	KAZN	330.833	-0.456018	0.114373	-3.98711	6.68836e-05	0.000751171
NM_001018008	TPM1	761.049	-0.0596014	0.0972106	-0.613116	0.5398	0.637302
NM_001018011	ZBTB16	0.956889	0.0307351	0.0803928	0.382311	0.702231	NA
NM_001018024	CMC4	546.946	-0.325032	0.10958	-2.96617	0.00301535	0.0123544
NM_001018025	MTCP1	440.351	-0.206112	0.114051	-1.8072	0.0707318	0.129982
NM_001018039	SFMBT2	305.694	-0.0805379	0.125735	-0.640538	0.521823	0.621106
NM_001018044	MAP3K19	0.309269	-0.00377776	0.0450428	-0.0838705	0.933159	NA
NM_001018049	PAEP	0	NA	NA	NA	NA	NA
NM_001018052	POLR3H	2647.16	-0.0866937	0.0870677	-0.995704	0.319394	0.423926
NM_001018053	PFKFB2	266.819	0.0610163	0.118483	0.51498	0.606567	0.69537
NM_001018054	LRP8	1158.32	-0.117771	0.104923	-1.12245	0.261671	0.360798
NM_001018055	BRCC3	1804.19	-0.43483	0.0945192	-4.60044	4.21592e-06	9.48409e-05
NM_001018057	DKK3	6.89747	0.104263	0.163993	0.635776	0.524922	NA
NM_001018058	TFEC	0.441738	0.0146351	0.0552607	0.264837	0.791135	NA
NM_001018060	AIFM3	7.99446	-0.192712	0.170312	-1.13152	0.257836	0.356612
NM_001018070	CORO1B	1256.83	-0.186698	0.0879751	-2.12216	0.033824	0.0741647
NM_001018071	FRMPD2	2.45796	-0.0129433	0.119054	-0.108718	0.913426	NA
NM_001018072	BTBD11	10.8784	0.542894	0.17744	3.05959	0.00221637	0.00979929
NM_001018073	PCK2	119.516	-0.414689	0.144552	-2.86878	0.00412056	0.0155193
NM_001018074	NR3C1	5144.34	-0.223646	0.0980457	-2.28104	0.0225461	0.0546196
NM_001018078	FPGS	1025.87	-0.083922	0.0938309	-0.894396	0.37111	0.475857
NM_001018081	KIR2DL5B	0	NA	NA	NA	NA	NA
NM_001018082	ADIG	0	NA	NA	NA	NA	NA
NM_001018088	VPS13C	440.795	-0.545052	0.123773	-4.40366	1.06441e-05	0.000189533
NM_001018100	MYZAP	0.16973	0.0203348	0.0324771	0.626128	0.531231	NA
NM_001018109	PIR	671.652	-0.320037	0.102307	-3.12821	0.00175877	0.00828845
NM_001018111	PODXL	6.02959	0.106412	0.157295	0.676511	0.498717	NA
NM_001018116	MURC	25.6452	-0.334191	0.189288	-1.76552	0.0774765	0.13984
NM_001020	RPS16	31276.7	-0.143264	0.0821594	-1.74373	0.0812065	0.145188
NM_001020658	PUM1	3086.07	-0.328873	0.0919463	-3.5768	0.000347832	0.00253885
NM_001022	RPS19	9468.76	-0.160506	0.0845916	-1.89743	0.0577718	0.111181
NM_001023	RPS20	15522	-0.12703	0.0851991	-1.49098	0.135967	0.216178
NM_001023561	ZNF749	312.599	-0.0655426	0.120524	-0.543816	0.586568	0.677718
NM_001023563	ZNF805	468.843	-0.20298	0.117372	-1.72937	0.0837424	0.148525
NM_001023571	IQCB1	1108.02	-0.344328	0.0982361	-3.50511	0.000456419	0.00308653
NM_001023587	ABCC5	289.377	-0.508959	0.129241	-3.93805	8.21454e-05	0.000875544
NM_001024	RPS21	8633.7	-0.131773	0.0850958	-1.54852	0.121497	0.197961
NM_001024024	GCH1	91.7693	0.124819	0.158268	0.788655	0.430314	0.534265
NM_001024074	HNMT	0.339461	0.0392793	0.0448528	0.875737	0.381173	NA
NM_001024209	SPRR2E	0	NA	NA	NA	NA	NA
NM_001024227	ARF1	17396.2	-0.226855	0.0840042	-2.70052	0.00692301	0.0226876
NM_001024372	BAALC	0	NA	NA	NA	NA	NA
NM_001024382	HMBS	762.137	-0.192669	0.0958215	-2.0107	0.0443567	0.0910306
NM_001024383	NAV3	0.309269	-0.00377776	0.0450428	-0.0838705	0.933159	NA
NM_001024401	SBK1	52.1407	-0.303118	0.17721	-1.7105	0.0871732	0.152975
NM_001024452	GLRA4	0	NA	NA	NA	NA	NA
NM_001024455	RGAG4	0.16973	0.0203348	0.0324771	0.626128	0.531231	NA
NM_001024457	RGPD1	2.23285	-0.0984393	0.112789	-0.872773	0.382787	NA
NM_001024593	MSS51	54.7228	-0.166538	0.172372	-0.966158	0.333965	0.438573
NM_001024594	C1orf53	11.0898	0.0872093	0.177766	0.490584	0.623721	0.709863
NM_001024596	ZNF772	3.3035	0.0241659	0.127594	0.189396	0.849782	NA
NM_001024598	HES3	36.0391	-0.138168	0.184376	-0.749378	0.453629	0.556853
NM_001024599	HIST2H2BF	3.32064	-0.195091	0.128948	-1.51295	0.130293	NA
NM_001024601	SPATA45	1.82778	0.0322638	0.103461	0.311846	0.755158	NA
NM_001024603	LOC154872	0	NA	NA	NA	NA	NA
NM_001024607	C7orf66	0	NA	NA	NA	NA	NA
NM_001024611	LRRC66	0.811391	0.0957643	0.0689291	1.38932	0.164737	NA
NM_001024613	FEZF1	0	NA	NA	NA	NA	NA
NM_001024644	XCR1	0	NA	NA	NA	NA	NA
NM_001024649	CANX	9519.34	-0.307555	0.0963215	-3.193	0.00140802	0.00704809
NM_001024656	ASPDH	0.993041	0.0266267	0.0789431	0.33729	0.735899	NA
NM_001024660	KALRN	1.14381	-0.026472	0.0795716	-0.332681	0.739375	NA
NM_001024661	PRAMEF14	0	NA	NA	NA	NA	NA
NM_001024662	RPL6	10160.6	-0.155633	0.0854039	-1.82232	0.0684071	0.126659
NM_001024674	LIN52	431.401	0.024148	0.113857	0.212091	0.832036	0.875462
NM_001024675	ACTL10	51.257	0.0434897	0.173736	0.25032	0.80234	0.853376
NM_001024678	LRRC24	1229.15	-0.278331	0.0880448	-3.16124	0.00157098	0.00763956
NM_001024679	C1orf68	0	NA	NA	NA	NA	NA
NM_001024680	FBXO48	55.9904	0.099007	0.171477	0.577378	0.563684	0.657959
NM_001024683	ZNF688	145.033	0.0306745	0.138041	0.222213	0.824148	0.870102
NM_001024732	MECR	502.047	-0.132446	0.103523	-1.27939	0.200759	0.293314
NM_001024736	CD276	705.423	-0.185702	0.101292	-1.83334	0.0667521	0.124326
NM_001024807	APLP1	648.875	-0.23248	0.0992536	-2.34228	0.0191661	0.0484739
NM_001024808	BCL7A	915.622	-0.0691071	0.0961156	-0.718999	0.472141	0.574366
NM_001024822	RNASE12	0	NA	NA	NA	NA	NA
NM_001024843	TNRC6B	1061.93	-0.377269	0.107065	-3.52375	0.000425486	0.00292798
NM_001024844	CD82	0.477128	0.0122972	0.0565774	0.217351	0.827935	NA
NM_001024845	SLC6A9	384.056	-0.106071	0.11466	-0.925094	0.354917	0.459587
NM_001024847	TGFBR2	31.5414	-0.154938	0.186383	-0.831289	0.40581	0.509897
NM_001024855	ZNF197	0	NA	NA	NA	NA	NA
NM_001024858	SPTB	53.2874	-0.146496	0.174632	-0.838885	0.401534	0.505992
NM_001024912	CEACAM1	0.946668	-0.0823091	0.0742352	-1.10876	0.267534	NA
NM_001024916	CBWD5	91.3204	-0.0533786	0.160184	-0.333233	0.738958	0.803807
NM_001024921	RPL9	8065.47	-0.193412	0.0926074	-2.08851	0.0367517	0.0789513
NM_001024924	EXOC1	351.095	-0.0973305	0.117017	-0.831767	0.405541	0.509752
NM_001024935	WASF1	1523.27	-0.311062	0.101117	-3.07625	0.00209622	0.00944155
NM_001024946	ASL	997.193	-0.182632	0.100901	-1.81001	0.0702935	0.129335
NM_001025	RPS23	9540.52	-0.10145	0.0845876	-1.19935	0.230391	0.326255
NM_001025068	ARPP21	0	NA	NA	NA	NA	NA
NM_001025070	RPS14	9496.88	-0.171025	0.0845326	-2.02319	0.0430538	0.0889325
NM_001025081	MBP	0.200416	-0.0258074	0.0347035	-0.743654	0.457086	NA
NM_001025087	CELF4	2.97326	-0.0773528	0.121344	-0.637466	0.523821	NA
NM_001025091	ABCF1	0.165025	-0.0221846	0.0322425	-0.688056	0.491417	NA
NM_001025096	PSMA8	0	NA	NA	NA	NA	NA
NM_001025104	CSN1S1	0	NA	NA	NA	NA	NA
NM_001025109	CD34	0.200416	-0.0258074	0.0347035	-0.743654	0.457086	NA
NM_001025158	CD74	1.71402	-0.069386	0.102765	-0.67519	0.499555	NA
NM_001025160	CD97	109.852	-0.537129	0.147269	-3.64726	0.000265047	0.00209411
NM_001025161	CYP2D6	26.6383	-0.125926	0.188903	-0.666616	0.505017	0.605831
NM_001025194	CES1	0	NA	NA	NA	NA	NA
NM_001025197	CHI3L2	0	NA	NA	NA	NA	NA
NM_001025200	CTRB2	0	NA	NA	NA	NA	NA
NM_001025201	CHN1	12.5759	0.250348	0.184193	1.35916	0.174095	0.262279
NM_001025203	U2AF1	5886.58	-0.124501	0.0911714	-1.36557	0.172073	0.259992
NM_001025205	AP2M1	8817.13	-0.233193	0.083936	-2.77823	0.00546566	0.0190918
NM_001025231	KPRP	0	NA	NA	NA	NA	NA
NM_001025232	CLLU1OS	0	NA	NA	NA	NA	NA
NM_001025233	CLLU1	0	NA	NA	NA	NA	NA
NM_001025237	TSPAN4	1523.52	-0.175642	0.0856775	-2.05004	0.0403608	0.0846428
NM_001025247	TAF5L	1803.69	-0.110046	0.0916578	-1.20062	0.229899	0.325733
NM_001025248	DUT	3483.62	-0.220802	0.0890438	-2.4797	0.0131495	0.0365159
NM_001025252	TPD52	1.98619	0.206215	0.108479	1.90096	0.057307	NA
NM_001025265	CXorf65	0	NA	NA	NA	NA	NA
NM_001025266	C3orf70	496.549	-0.0202951	0.109847	-0.184757	0.85342	0.892028
NM_001025290	DPPA5	0	NA	NA	NA	NA	NA
NM_001025295	IFITM5	0	NA	NA	NA	NA	NA
NM_001025300	RAB12	1890.66	-0.252798	0.102337	-2.47025	0.0135018	0.0372247
NM_001025357	AARD	0.365441	-0.0516408	0.0487104	-1.06016	0.289073	NA
NM_001025433	NQO1	3350.09	-0.0880608	0.0930579	-0.946301	0.343995	0.44871
NM_001025436	SPAG16	176.429	-0.282875	0.138566	-2.04145	0.0412061	0.0860221
NM_001025591	SCGB2B2	0.830138	0.105071	0.0720234	1.45885	0.144606	NA
NM_001025596	CELF1	1031.34	-0.453279	0.0981079	-4.62021	3.83359e-06	8.89851e-05
NM_001025598	ARHGAP30	3.92605	-0.0112932	0.136429	-0.0827765	0.934029	NA
NM_001025603	RFX5	2816.76	-0.49276	0.091167	-5.40503	6.47982e-08	4.26712e-06
NM_001025604	ARRDC2	605.853	-0.107853	0.103096	-1.04614	0.295495	0.398701
NM_001025616	ARHGAP24	0	NA	NA	NA	NA	NA
NM_001025780	ABHD17B	978.883	-0.325309	0.101507	-3.20479	0.0013516	0.00683319
NM_001028	RPS25	8534.64	-0.158676	0.0889618	-1.78364	0.0744814	0.135432
NM_001029	RPS26	3312.38	-0.118278	0.0877542	-1.34783	0.177712	0.266653
NM_001029851	PDE8B	21.0903	-0.0513951	0.189656	-0.270991	0.786398	0.840998
NM_001029858	SLC35F1	1.49064	0.149076	0.0959305	1.554	0.120184	NA
NM_001029859	KCTD21	186.751	-0.232818	0.13574	-1.71518	0.0863123	0.151972
NM_001029861	NANOS2	0	NA	NA	NA	NA	NA
NM_001029863	C6orf120	2218.93	-0.154267	0.0956858	-1.61223	0.106913	0.179169
NM_001029864	KIAA1755	0	NA	NA	NA	NA	NA
[truncated: 23,679 more rows]
