# Supplementary figures and images for: Targeted degradation of BRD9 reverses oncogenic gene expression in synovial sarcoma
Source: eLife journal article supplement (doi:10.7554/elife.41305), 2018-11-15

**A**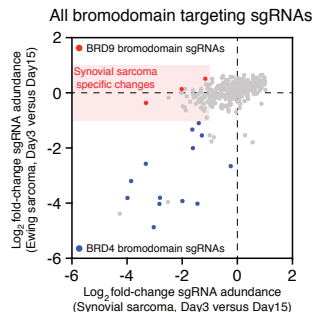**B**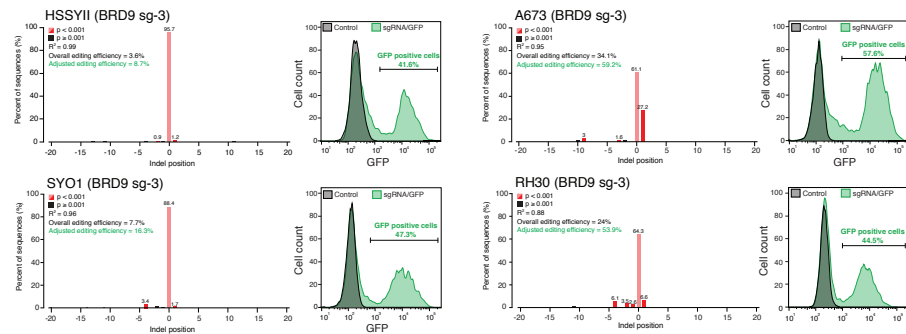**C**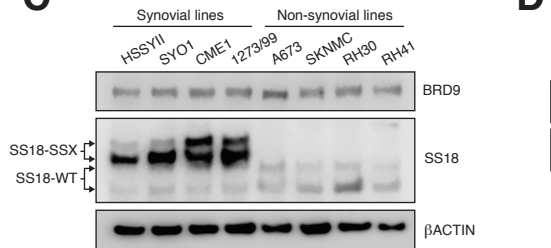**D**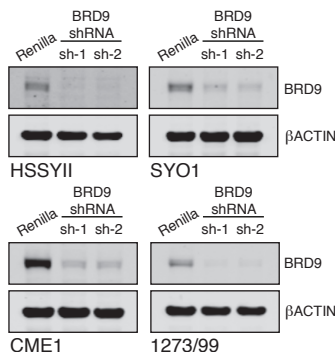**E**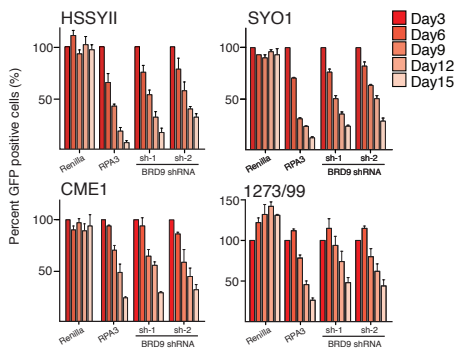**F**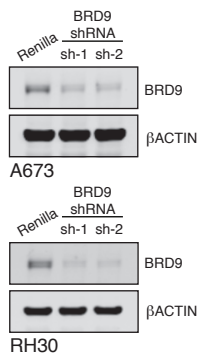**G**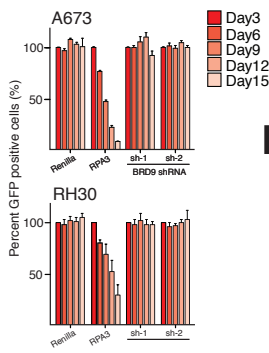**H**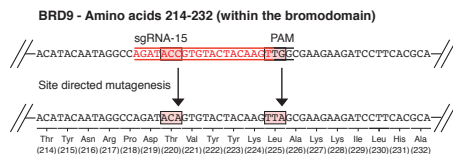**I**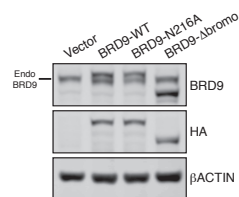

Supplement: supp [file elife_poa_e41305_Figure_1_figure_supplement_1.pdf › elife_poa_e41305_Figure_1_figure_supplement_1.pdf]

**A**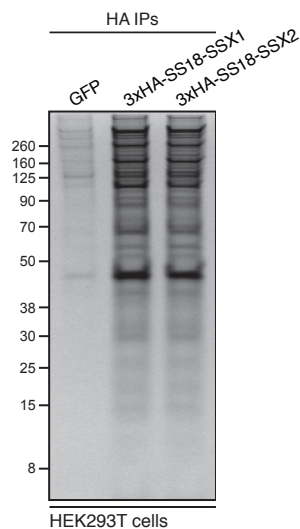**B**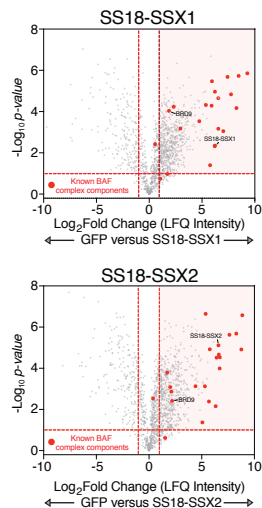**C**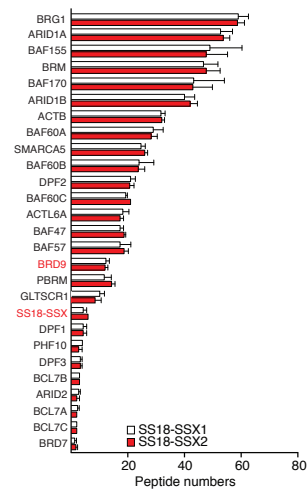**D**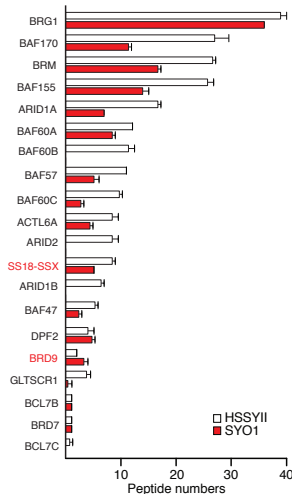**E**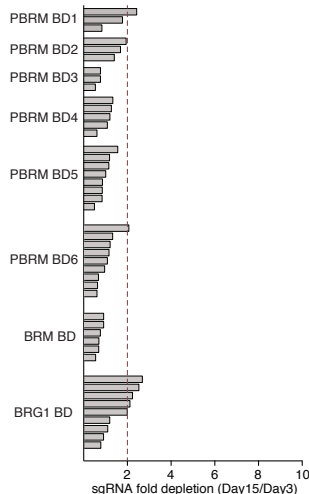

Supplement: supp [file elife_poa_e41305_Figure_2_figure_supplement_1.pdf › elife_poa_e41305_Figure_2_figure_supplement_1.pdf]

**A**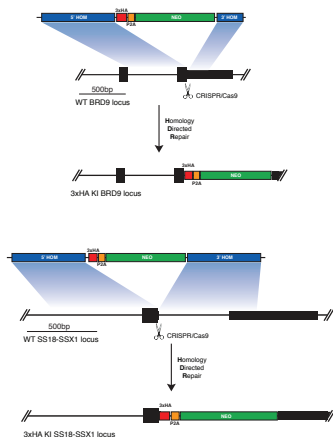**B**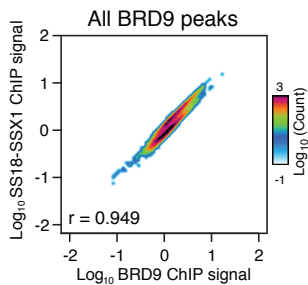**C**

BRD9 target genes (9299)

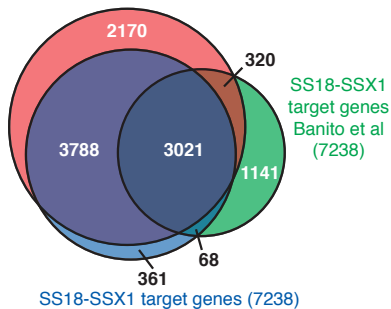

Supplement: supp [file elife_poa_e41305_Figure_3_figure_supplement_1.pdf › elife_poa_e41305_Figure_3_figure_supplement_1.pdf]

**A**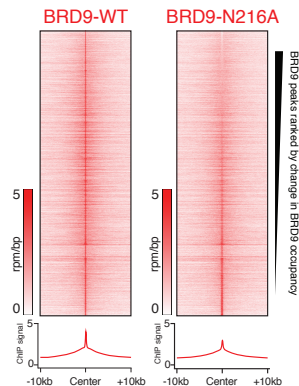**B**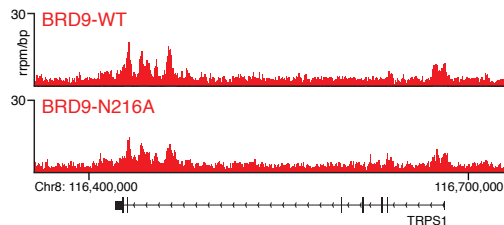**C**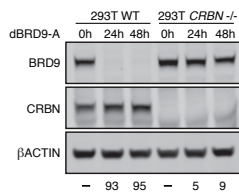**D**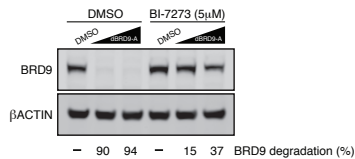**E**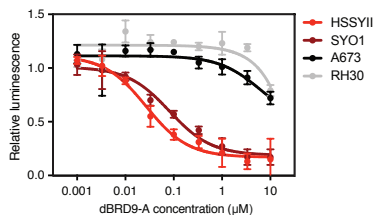**F**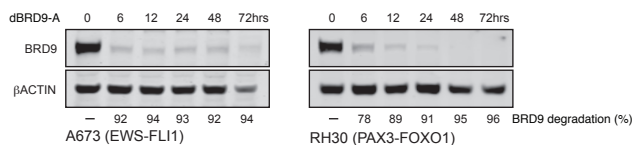**G**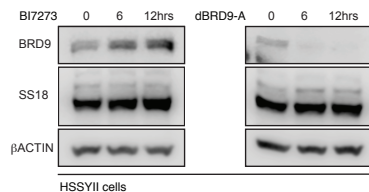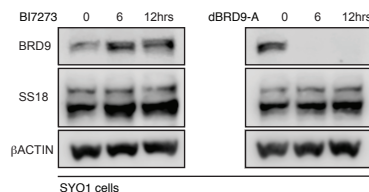**H**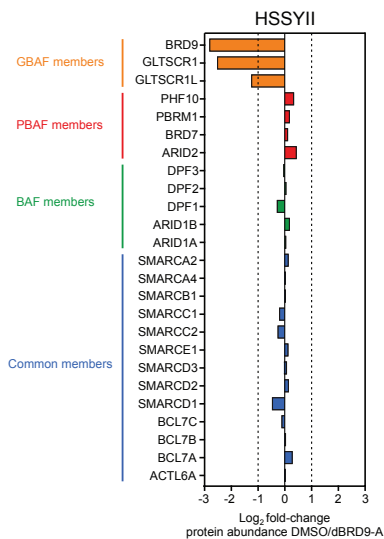

Supplement: supp [file elife_poa_e41305_Figure_4_figure_supplement_1.pdf › elife_poa_e41305_Figure_4_figure_supplement_1.pdf]

**A**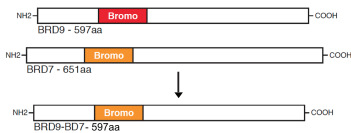**B**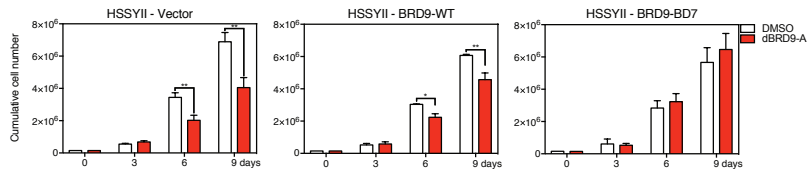**C**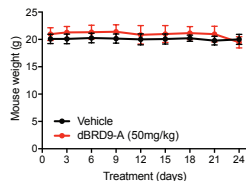**D**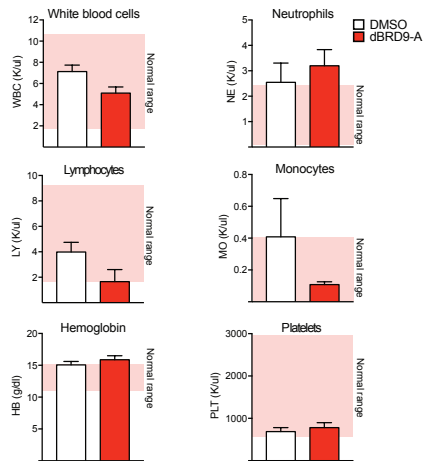**E**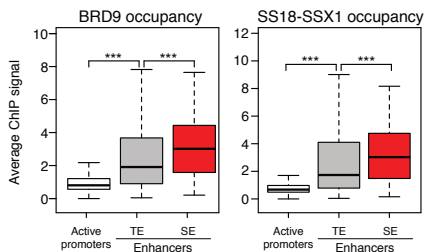**F**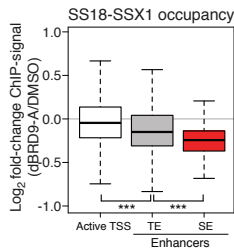**G**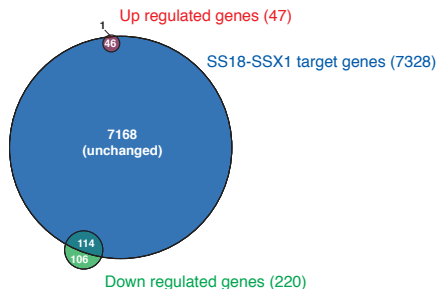

Supplement: supp [file elife_poa_e41305_Figure_5_figure_supplement_1.pdf › elife_poa_e41305_Figure_5_figure_supplement_1.pdf]
